# Supplementary material for: AKR1C1 as a Biomarker for Differentiating the Biological Effects of Combustible from Non-Combustible Tobacco Products
Source: Preprints.org preprint supplement (doi:10.20944/preprints201701.0111.v1), 2017-01-25
Supplement: Supplementary file 1 [file supplementary]

## Sheet: TPM
AffyIDs	logFC	AveExpr	t	P.Value	adj.P.Val	B	Gene_Symbol	EntrezID
209699_x_at	1.64579	1.20583	20.1272	2.92452e-13	1.33021e-07	17.9893	AKR1C1, AKR1C2	1645, 1646
216594_x_at	1.61808	1.18848	17.8433	2.05966e-12	4.68415e-07	16.7095	AKR1C1, AKR1C2	1645, 1646
204151_x_at	1.68029	1.24753	16.7111	5.90558e-12	8.95381e-07	15.9739	AKR1C1, AKR1C2	1645, 1646
206504_at	-1.75292	-0.403728	-15.6569	1.67009e-11	1.89909e-06	15.2185	CYP24A1	1591
211653_x_at	1.64597	1.22326	14.5579	5.28201e-11	4.80502e-06	14.3495	AKR1C1, AKR1C2	1645, 1646
242037_at	1.47933	0.50608	14.0806	8.91576e-11	6.75886e-06	13.9438	ASPH	444
200665_s_at	-1.1912	-0.26687	-13.591	1.54998e-10	9.12583e-06	13.5082	SPARC	6678
201510_at	-1.38422	-0.225448	-13.5606	1.60508e-10	9.12583e-06	13.4804	ELF3,	1999
210827_s_at	-1.23401	-0.110381	-12.0437	9.99827e-10	5.053e-05	11.9905	ELF3,	1999
214858_at	-1.42812	-0.0327465	-11.5039	2.0058e-09	8.2949e-05	11.4056		100130449
221232_s_at	-1.11858	-0.140987	-11.5038	2.00603e-09	8.2949e-05	11.4055	ANKRD2	26287
207528_s_at	1.28998	0.444444	10.9679	4.10961e-09	0.000148883	10.7935	SLC7A11	23657
203065_s_at	-0.738033	-0.138305	-10.9423	4.25521e-09	0.000148883	10.7636	CAV1	857
229842_at	-1.53654	-0.335484	-10.8638	4.73829e-09	0.000153943	10.671	ELF3	1999
226016_at	-1.11877	-0.326127	-10.8006	5.16924e-09	0.000156748	10.5958	CD47	961
205945_at	0.945461	0.189314	10.6212	6.63014e-09	0.000188482	10.3803	IL6R	3570
203973_s_at	-0.743405	-0.0980995	-10.5107	7.74133e-09	0.000207125	10.2456	CEBPD	1052
221521_s_at	-0.809767	-0.438342	-10.3089	1.03071e-08	0.000260453	9.99576	GINS2	51659
1555854_at	2.10743	1.41605	10.2695	1.09037e-08	0.000261027	9.94649	AKR1C1, AKR1C2	1645, 1646
228039_at	-0.859828	-0.114288	-10.167	1.26353e-08	0.000287358	9.81718	DDX46	9879
1557094_at	-1.03012	-0.0256914	-10.1149	1.3625e-08	0.000295111	9.75089	, ANXA8	653145
228401_at	-0.798477	-0.339584	-10.015	1.57541e-08	0.000325715	9.623	ATAD2	29028
239680_at	-1.07399	-0.437962	-9.92853	1.78794e-08	0.000353583	9.51127	WDR76	79968
1553764_a_at	-1.01397	-0.234581	-9.68837	2.55177e-08	0.000483612	9.1959	AJUBA	84962
205569_at	-0.706941	-0.0963871	-9.51526	3.31063e-08	0.000602333	8.9639	LAMP3	27074
219295_s_at	0.871698	0.360776	9.39046	4.00245e-08	0.000700195	8.79417	PCOLCE2	26577
207826_s_at	-0.731385	-0.139957	-9.15078	5.79105e-08	0.000975575	8.46235	ID3	3399
206785_s_at	-1.66654	0.0235387	-9.05137	6.76317e-08	0.00109865	8.3224	KLRC1, KLRC2	3821, 3822
209469_at	-1.29271	-0.370049	-8.9178	8.3463e-08	0.00128469	8.13221	GPM6A	2823
225807_at	-1.21922	-0.367026	-8.90826	8.47331e-08	0.00128469	8.11853	AJUBA	84962
203038_at	-0.581746	0.108919	-8.85606	9.20497e-08	0.0013303	8.04347	PTPRK	5796
219991_at	-0.743605	0.112972	-8.83877	9.46174e-08	0.0013303	8.01851	SLC2A9	56606
215729_s_at	-1.43988	-0.507585	-8.8263	9.65156e-08	0.0013303	8.00049	VGLL1	51442
205239_at	-0.720992	-0.135003	-8.78654	1.02838e-07	0.00137057	7.94288	AREG	374
203710_at	0.663325	0.36571	8.77077	1.05464e-07	0.00137057	7.91998	ITPR1	3708
212097_at	-0.654273	-0.164219	-8.74838	1.09315e-07	0.00138116	7.88738	CAV1	857
232126_at	-0.892341	-0.285716	-8.69431	1.19231e-07	0.00146573	7.8084
206385_s_at	-1.02802	-0.238034	-8.63646	1.30892e-07	0.00154162	7.72342	ANK3	288
223709_s_at	-1.22776	-0.0507703	-8.63039	1.32183e-07	0.00154162	7.71447	WNT10A	80326
1562102_at	2.22804	1.18412	8.39754	1.93271e-07	0.00219772	7.36735
1554079_at	-0.695465	-0.258574	-8.28089	2.34379e-07	0.00254275	7.19048	GALNT18	374378
217833_at	-0.708565	-0.265587	-8.27983	2.34793e-07	0.00254275	7.18886	SYNCRIP	10492
204798_at	-0.879889	-0.184456	-8.26045	2.42479e-07	0.00256492	7.15928	MYB	4602
203074_at	-0.999357	-0.135132	-8.2409	2.50499e-07	0.00258952	7.12938	ANXA8L1, ANXA8	643650, 728113, 653145
239587_at	-1.40472	-0.00658462	-8.19792	2.69121e-07	0.00268661	7.06346	TLR3	7098
1555536_at	0.939342	0.378225	8.17675	2.7882e-07	0.00268661	7.03089	ANTXR2	118429
1553449_at	1.34612	0.496054	8.16133	2.86116e-07	0.00268661	7.00712
219938_s_at	-1.09256	-0.305698	-8.15861	2.87424e-07	0.00268661	7.00292	PSTPIP2	9050
209788_s_at	-0.78272	-0.0915629	-8.15447	2.89424e-07	0.00268661	6.99654	ERAP1	51752
226225_at	-0.799134	-0.150571	-8.09456	3.20078e-07	0.00291174	6.9038	MCC	4163
226333_at	0.946607	0.263619	8.0234	3.6095e-07	0.00316117	6.79296	IL6R	3570
212096_s_at	-1.01978	-0.0916406	-8.02267	3.61398e-07	0.00316117	6.79181	MTUS1	57509
1556029_s_at	-1.05336	-0.0457461	-7.99116	3.8123e-07	0.00324835	6.74249	NMNAT2	23057
202659_at	-0.998848	-0.305261	-7.98438	3.85647e-07	0.00324835	6.73185	, PSMB10	5699
229543_at	-0.857295	-0.238002	-7.94498	4.12376e-07	0.00335977	6.66992
209470_s_at	-1.31691	-0.317481	-7.94317	4.13648e-07	0.00335977	6.66708	GPM6A	2823
219522_at	-0.947162	-0.346419	-7.88686	4.55397e-07	0.00363397	6.57814	FJX1	24147
202907_s_at	-0.56715	-0.270423	-7.84219	4.91634e-07	0.00384074	6.50725	NBN	4683
217626_at	1.10916	0.571367	7.82479	5.06546e-07	0.00384074	6.47957	AKR1C1	1645
238831_at	-0.657137	-0.281812	-7.81359	5.164e-07	0.00384074	6.46171	TMEM33	55161
204279_at	-1.15589	-0.300184	-7.80618	5.23034e-07	0.00384074	6.44988	PSMB9	5698
225806_at	-0.975456	-0.23036	-7.80563	5.23528e-07	0.00384074	6.44901	AJUBA	84962
209122_at	1.09537	0.635925	7.77845	5.48631e-07	0.00394969	6.40559	PLIN2	123
222455_s_at	-0.620966	-0.269569	-7.77099	5.55746e-07	0.00394969	6.39364	PARVA	55742
205603_s_at	-0.725666	-0.0892647	-7.71707	6.10067e-07	0.00426904	6.3071	DIAPH2	1730
204475_at	2.80278	1.45239	7.68736	6.42346e-07	0.004364	6.25921	MMP1	4312
1555852_at	-1.21193	-0.118244	-7.6856	6.44311e-07	0.004364	6.25637	PSMB8-AS1	100507463
214109_at	-0.510648	-0.0712269	-7.6784	6.52419e-07	0.004364	6.24476	LRBA	987
204324_s_at	-0.542551	-0.200606	-7.66715	6.65319e-07	0.00438578	6.22656	GOLIM4	27333
209457_at	1.19016	0.490468	7.65809	6.75882e-07	0.00439177	6.21192	DUSP5	1847
212461_at	-0.592375	-0.263448	-7.55511	8.09177e-07	0.00518385	6.04446	AZIN1	51582
205220_at	-0.965682	0.0214813	-7.52406	8.54544e-07	0.00532562	5.99365	HCAR3, HCAR2	8843, 338442
201743_at	-0.870059	0.0206151	-7.50175	8.88766e-07	0.00546289	5.95706	CD14	929
203946_s_at	0.656842	0.367339	7.43859	9.93648e-07	0.00602612	5.85303	ARG2	384
218435_at	-1.13642	-0.20434	-7.36869	1.12488e-06	0.00669475	5.7372	DNAJC15	29103
204646_at	-0.972547	-0.159345	-7.36449	1.13333e-06	0.00669475	5.73021	DPYD	1806
228153_at	-0.610093	-0.051099	-7.31548	1.23685e-06	0.00721257	5.64851	RNF144B	255488
212667_at	-0.669182	-0.270553	-7.29181	1.29033e-06	0.00742919	5.60891	SPARC	6678
208319_s_at	-0.672521	-0.522886	-7.25714	1.37304e-06	0.00779123	5.55078	RBM3	5935
202073_at	-0.679761	0.0524651	-7.25132	1.38747e-06	0.00779123	5.54099	OPTN	10133
242907_at	-0.712395	-0.149603	-7.1943	1.53736e-06	0.00852765	5.44491	GBP2	2634
230991_at	-0.878839	-0.10723	-7.18116	1.57425e-06	0.00862117	5.42269
214430_at	0.715102	0.213003	7.1749	1.59213e-06	0.00862117	5.4121	GLA	2717
226075_at	0.755934	0.175331	7.10764	1.79826e-06	0.00951088	5.29792	SPSB1	80176
212037_at	-0.639859	-0.355667	-6.96669	2.32556e-06	0.0116239	5.05636	PNN	5411
210367_s_at	-0.579074	0.0991534	-6.95198	2.38921e-06	0.0117116	5.03096	PTGES	9536
209016_s_at	-0.762399	-0.0669999	-6.93099	2.48313e-06	0.0120154	4.99468	KRT7	3855
211924_s_at	0.666509	0.294131	6.92279	2.52085e-06	0.0120695	4.98049	PLAUR	5329
218454_at	-0.610946	-0.184456	-6.91163	2.57317e-06	0.0121917	4.96116	PLBD1	79887
225885_at	-0.500871	-0.206127	-6.89438	2.65628e-06	0.0124557	4.93124	EEA1	8411
202481_at	-1.03242	-0.000802827	-6.86262	2.8167e-06	0.0130732	4.87601	DHRS3	9249
200790_at	1.04146	-0.106126	6.83981	2.93804e-06	0.0134015	4.83628	ODC1	4953
201288_at	-0.847046	-0.457	-6.83747	2.95079e-06	0.0134015	4.8322	ARHGDIB	397
218585_s_at	-0.569023	-0.222348	-6.83291	2.97583e-06	0.0134015	4.82423	DTL	51514
206157_at	-1.80921	-0.00541282	-6.8145	3.07912e-06	0.0136116	4.79207	PTX3	5806
203642_s_at	-0.616097	-0.240275	-6.81394	3.08233e-06	0.0136116	4.79109	COBLL1	22837
1557121_s_at	-0.560982	-0.146164	-6.80152	3.1542e-06	0.013795	4.76936	HEATR6	63897
205873_at	0.562241	-0.0385234	6.79011	3.22171e-06	0.0139561	4.7494	PIGL	9487
224428_s_at	-0.971584	-0.550297	-6.78003	3.28267e-06	0.014086	4.73172	CDCA7	83879
207723_s_at	-1.25358	0.0927173	-6.75812	3.41926e-06	0.014535	4.69326	KLRC3,	3823
1559433_at	0.810483	0.291127	6.74905	3.47753e-06	0.0146458	4.67732	APCDD1L-AS1	149773
224480_s_at	1.02047	0.321481	6.73499	3.56989e-06	0.0148969	4.65259	GPAT3	84803
208937_s_at	-0.572692	0.153268	-6.71898	3.67817e-06	0.0151849	4.62438	ID1	3397
225128_at	-0.578954	-0.198446	-6.715	3.70567e-06	0.0151849	4.61735	KDELC2	143888
204742_s_at	-0.530313	-0.19586	-6.65285	4.16301e-06	0.0164655	4.50744	PDS5B	23047
202043_s_at	-0.434111	-0.178751	-6.62468	4.38924e-06	0.0170636	4.45743	SMS,	6611
208673_s_at	-0.824926	-0.609952	-6.61971	4.43047e-06	0.0170779	4.44859	SRSF3	6428
208955_at	-0.641615	-0.262361	-6.60225	4.57852e-06	0.017249	4.41752	DUT	1854
222812_s_at	0.589192	0.298575	6.60213	4.57954e-06	0.017249	4.41731	RHOF	54509
223703_at	-0.626053	-0.2209	-6.60107	4.58863e-06	0.017249	4.41543	C10orf11	83938
201930_at	-0.818959	-0.400471	-6.58873	4.69663e-06	0.0175103	4.39343	MCM6	4175
200813_s_at	-0.613675	-0.311159	-6.57029	4.8629e-06	0.0178891	4.36053	PAFAH1B1	5048
204820_s_at	-0.543522	0.0561006	-6.56877	4.87691e-06	0.0178891	4.35781	BTN3A3, BTN3A2	10384, 11118
231897_at	0.478628	0.271408	6.531	5.23793e-06	0.0188161	4.29024	, PTGR1	22949
203665_at	1.43693	0.716205	6.49748	5.5815e-06	0.0196801	4.2301	HMOX1	3162
239817_at	-0.835194	-0.520165	-6.48022	5.76747e-06	0.0199529	4.19906
212922_s_at	-0.48521	-0.11282	-6.46968	5.88424e-06	0.0201236	4.18007	SMYD2	56950
208832_at	-0.774691	-0.287832	-6.44352	6.18466e-06	0.0209932	4.1329	ATXN10	25814
204840_s_at	-0.608107	-0.187317	-6.42822	6.36775e-06	0.0214306	4.10525	EEA1	8411
225664_at	-0.936688	-0.00575067	-6.42265	6.43568e-06	0.0214306	4.0952	COL12A1	1303
215724_at	-0.547405	-0.126764	-6.4197	6.4721e-06	0.0214306	4.08985	PLD1	5337
206108_s_at	-0.5879	-0.34169	-6.41256	6.56083e-06	0.0214306	4.07694	SRSF6,	6431
209442_x_at	-0.596114	-0.173583	-6.40975	6.59623e-06	0.0214306	4.07184	ANK3	288
225171_at	-0.668177	-0.259358	-6.39516	6.78266e-06	0.02188	4.04542	ARHGAP18	93663
209684_at	-0.568162	-0.256452	-6.3687	7.13489e-06	0.0228232	3.99741	RIN2	54453
1556226_at	0.590807	-0.200102	6.35074	7.38482e-06	0.0233262	3.96475
219990_at	-0.86674	-0.444707	-6.34083	7.5265e-06	0.0236098	3.94672	E2F8	79733
209118_s_at	0.522836	0.144545	6.33143	7.66363e-06	0.0238753	3.92959	TUBA1A	7846
232437_at	0.512934	0.184467	6.28339	8.40564e-06	0.0256597	3.84187	CPSF3L	54973, 102465435
214306_at	-0.687384	-0.21514	-6.27431	8.55394e-06	0.0259383	3.82526	OPA1	4976
1554539_a_at	0.617745	0.219362	6.24736	9.01077e-06	0.026964	3.77585	RHOF	54509
204472_at	1.221	0.745587	6.23649	9.20203e-06	0.0271787	3.7559	GEM	2669
201129_at	-0.810716	-0.469884	-6.22196	9.46433e-06	0.0277731	3.7292	SRSF7	6432
230405_at	-0.604871	-0.0136161	-6.20194	9.83842e-06	0.0286858	3.69236	C5orf56
225429_at	-0.477517	-0.249043	-6.19714	9.9304e-06	0.0287696	3.68352	PPP6C	5537
203640_at	-0.670303	0.164108	-6.1008	1.19772e-05	0.0330169	3.50531	MBNL2	10150
215772_x_at	-0.565916	-0.250234	-6.09644	1.20793e-05	0.0330842	3.49723	SUCLG2	8801
237435_at	-1.02831	-0.0533929	-6.07671	1.25539e-05	0.0330842	3.46056
219076_s_at	-0.461447	-0.202134	-6.07551	1.25835e-05	0.0330842	3.45832	, PXMP2	5827
239989_at	-0.631953	-0.366968	-6.06374	1.28765e-05	0.0336602	3.43641	CNTLN	54875
232752_at	-0.78188	-0.41164	-6.03097	1.37301e-05	0.0356863	3.3753	LOXL1-AS1	100287616
205633_s_at	0.501639	0.200918	6.00923	1.43287e-05	0.0370305	3.33467	ALAS1	211
1555812_a_at	-0.880351	-0.45003	-5.99205	1.48205e-05	0.0376596	3.30252	ARHGDIB	397
209755_at	-1.10031	0.164814	-5.98084	1.51509e-05	0.038066	3.28152	NMNAT2	23057
229879_at	0.570698	0.309681	5.98077	1.51529e-05	0.038066	3.28139	ASPH	444
238725_at	-1.11962	-0.0716396	-5.97685	1.52702e-05	0.038066	3.27404	IRF1	3659
236646_at	-0.83261	0.158497	-5.95689	1.58826e-05	0.0392618	3.23658	TMEM52B	120939
229568_at	-0.680731	-0.2184	-5.94787	1.61674e-05	0.0395059	3.21965	MOB3B	79817
222889_at	-0.550947	-0.404981	-5.94554	1.62419e-05	0.0395059	3.21526	DCLRE1B	64858
225381_at	0.679055	0.56424	5.93428	1.66066e-05	0.0397552	3.1941	MIR100HG	399959
200644_at	0.471367	0.211833	5.92054	1.70633e-05	0.0404603	3.16824	MARCKSL1	65108
204549_at	-0.46465	-0.0698724	-5.92008	1.7079e-05	0.0404603	3.16736	IKBKE	9641
203148_s_at	-0.857464	-0.386182	-5.91162	1.7367e-05	0.0409293	3.15142	TRIM14	9830
229551_x_at	-0.804122	-0.350077	-5.9016	1.77145e-05	0.0415329	3.13253	ZNF367	195828
211756_at	0.788675	0.326839	5.89385	1.79883e-05	0.0415718	3.11791	PTHLH	5744
202509_s_at	-0.807938	-0.162576	-5.89337	1.80052e-05	0.0415718	3.11701	TNFAIP2	7127
224617_at	-0.463282	-0.157793	-5.88679	1.82414e-05	0.0416939	3.10458	PTBP3	9991
216870_x_at	-0.520152	-0.685532	-5.87552	1.8653e-05	0.0422255	3.08331	DLEU2, DLEU2L	406948
227132_at	-0.522249	-0.246276	-5.87534	1.86597e-05	0.0422255	3.08296	ZNF706	51123
1564372_s_at	-0.635273	-0.45471	-5.84724	1.9729e-05	0.0442054	3.02981	CASC2	255082
1564064_a_at	0.46701	0.113133	5.8248	2.06287e-05	0.045598	2.98727	ATP11B	23200
204860_s_at	-0.708905	-0.41048	-5.82425	2.06512e-05	0.045598	2.98623	, NAIP	4671
223274_at	-0.638899	-0.280847	-5.81854	2.08869e-05	0.0458955	2.9754	TCF19	6941
209846_s_at	-0.580172	0.0759094	-5.81489	2.10391e-05	0.0459757	2.96847	BTN3A2	11118
228824_s_at	0.467812	0.275921	5.79124	2.20534e-05	0.0473159	2.92354	, PTGR1	22949
227068_at	-0.42086	-0.175858	-5.77917	2.25903e-05	0.0479742	2.90058	PGK1	5230
209123_at	-0.463752	-0.256544	-5.77749	2.26663e-05	0.0479742	2.89737	QDPR	5860
202488_s_at	-0.496685	0.231455	-5.77726	2.26767e-05	0.0479742	2.89693	FXYD3	5349, 102466205
222248_s_at	0.601769	0.205992	5.7484	2.40213e-05	0.0495239	2.84194	SIRT4	23409
215672_s_at	0.457151	0.203234	5.74803	2.40389e-05	0.0495239	2.84124	AHCYL2	23382
209488_s_at	-0.574434	-0.0967619	-5.74745	2.4067e-05	0.0495239	2.84013	RBPMS	11030
238824_at	0.557046	0.297346	5.74528	2.41714e-05	0.0495239	2.836	RPS29	6235
232026_at	-0.603928	-0.197313	-5.72448	2.5198e-05	0.0504204	2.79627	HERC4	26091
243136_at	-0.570258	-0.207847	-5.72298	2.5274e-05	0.0504204	2.7934	GINS2	51659
211864_s_at	-0.667135	0.0499477	-5.69931	2.65007e-05	0.0525711	2.74813	MYOF	26509
219045_at	0.702498	0.296724	5.69154	2.69166e-05	0.0529999	2.73326	RHOF	54509
227747_at	0.432884	0.180999	5.68678	2.7175e-05	0.0532779	2.72413	MPZL3	196264
202620_s_at	-0.444548	0.0454992	-5.68323	2.7369e-05	0.0534281	2.71733	PLOD2	5352
205034_at	-0.966306	-0.420023	-5.67959	2.75697e-05	0.0535899	2.71035	CCNE2	9134
226834_at	0.426688	0.164981	5.67203	2.79911e-05	0.0539479	2.69586	CLMP	79827
208606_s_at	-0.625256	0.156437	-5.65425	2.90089e-05	0.0554354	2.66173	WNT4	54361
227176_at	-0.529339	0.0860358	-5.64084	2.9802e-05	0.056014	2.63596	SLC2A13	114134
229296_at	-0.728566	0.227286	-5.63671	3.00506e-05	0.0562488	2.62802	LINC01503	100506119
225060_at	-0.553564	-0.0447754	-5.63181	3.03486e-05	0.0565739	2.61859	LRP11	84918
224797_at	0.664173	-0.322966	5.62828	3.0565e-05	0.0567447	2.6118	ARRDC3	57561
218875_s_at	-0.60997	-0.364782	-5.62288	3.08994e-05	0.0570802	2.6014	FBXO5	26271
201202_at	-0.418512	-0.222616	-5.62131	3.09967e-05	0.0570802	2.59839	PCNA	5111
226074_at	0.4814	0.279232	5.57734	3.38715e-05	0.0606679	2.5136	PPM1M	132160
202436_s_at	0.458656	0.126536	5.57625	3.39464e-05	0.0606679	2.51149	CYP1B1	1545
235520_at	0.503111	-0.0714036	5.57529	3.4012e-05	0.0606679	2.50964	ZNF280C	55609
203658_at	0.46179	0.0579526	5.56492	3.47324e-05	0.0616733	2.4896	SLC25A20	788
229823_at	-0.570057	-0.151221	-5.56065	3.50335e-05	0.0616733	2.48135	RIMS2	9699
225348_at	-0.68673	-0.471004	-5.56029	3.50591e-05	0.0616733	2.48065	SRSF10	10772
219926_at	0.645587	0.0390614	5.55946	3.5118e-05	0.0616733	2.47904	POPDC3	64208
218677_at	0.642286	0.378163	5.54104	3.6451e-05	0.0635236	2.44342	S100A14	57402
223974_at	-0.782374	0.343875	-5.53755	3.67094e-05	0.0637298	2.43666	DLGAP1-AS2
225276_at	-0.406574	0.0988173	-5.53417	3.69616e-05	0.0639236	2.43011	GSPT1	2935
207850_at	-0.568257	-0.33611	-5.50771	3.89977e-05	0.0666844	2.37882	CXCL3	2921
223158_s_at	-0.425916	0.0348266	-5.47749	4.14654e-05	0.0698535	2.32012	NEK6	10783
229011_at	0.559031	0.345083	5.47254	4.1885e-05	0.0698614	2.31048	EMP1	2012
206924_at	1.28348	0.859565	5.472	4.19308e-05	0.0698614	2.30944	IL11	3589
229391_s_at	-0.553987	-0.10445	-5.43701	4.50249e-05	0.0728809	2.2413	FAM26F	441168
204985_s_at	-0.538288	0.0363033	-5.42223	4.64023e-05	0.0747034	2.21246	TRAPPC6A	79090
232140_at	0.45834	0.246034	5.41796	4.68078e-05	0.0747034	2.20413
227314_at	1.14673	0.647297	5.40159	4.83975e-05	0.0761713	2.17216	ITGA2	3673
235766_x_at	-0.719269	-0.327603	-5.38394	5.01738e-05	0.0774687	2.13765	RAB27A	5873
214835_s_at	-0.545934	-0.279242	-5.38203	5.03707e-05	0.0774687	2.1339	SUCLG2P2, SUCLG2	8801
202920_at	-0.732265	-0.299269	-5.38161	5.0414e-05	0.0774687	2.13308	ANK2	287
202532_s_at	-0.454261	-0.206067	-5.36888	5.1743e-05	0.0786387	2.10817	DHFR	1719
202534_x_at	-0.441438	-0.191987	-5.36682	5.19614e-05	0.0786387	2.10413	DHFR	1719
226529_at	-0.665032	-0.301702	-5.3562	5.31025e-05	0.0790368	2.08333	TMEM106B	54664
222740_at	-0.408069	-0.2297	-5.34944	5.38426e-05	0.0797727	2.07008	ATAD2	29028
235921_at	-0.447951	-0.07809	-5.34258	5.46051e-05	0.0799482	2.05661
201324_at	0.53344	0.393836	5.33124	5.58882e-05	0.0812162	2.03437	EMP1	2012
228045_at	-0.785564	-0.376731	-5.31056	5.83097e-05	0.0841112	1.99374	SUGT1	10910
212308_at	-0.680717	-0.26249	-5.30948	5.84394e-05	0.0841112	1.99162	CLASP2	23122
226034_at	1.02046	0.706181	5.30797	5.862e-05	0.0841112	1.98866	DUSP4	1846
227153_at	-0.577909	-0.233873	-5.30126	5.94339e-05	0.0848074	1.97545	IMMP2L	83943
219561_at	-0.519045	-0.153756	-5.29713	5.99401e-05	0.0848074	1.96733	COPZ2	51226
204671_s_at	-0.662652	-0.30378	-5.29574	6.01109e-05	0.0848074	1.9646	ANKRD6	22881
201750_s_at	-0.366199	0.0567189	-5.29378	6.03543e-05	0.0848074	1.96073	ECE1	1889
1554250_s_at	0.625725	-0.0249926	5.29242	6.05232e-05	0.0848074	1.95805
205352_at	0.520229	0.0991454	5.29126	6.0667e-05	0.0848074	1.95578	SERPINI1	5274
236101_at	-0.525881	0.0427447	-5.28985	6.08428e-05	0.0848074	1.95301	SLC2A9	56606
201952_at	-0.400366	0.08917	-5.27909	6.22037e-05	0.0859977	1.93182	ALCAM	214
223136_at	-0.385702	-0.325761	-5.27001	6.33758e-05	0.0865404	1.91393	AIG1	51390
229615_at	-0.412453	-0.201928	-5.25744	6.50369e-05	0.0870708	1.88915	SLX4IP	128710
1565975_at	-0.506653	-0.427432	-5.25574	6.5265e-05	0.0870708	1.88579
209770_at	-0.454989	0.0419943	-5.25565	6.5277e-05	0.0870708	1.88562	BTN3A1	11119
217890_s_at	-0.380913	-0.271661	-5.24488	6.67405e-05	0.0885039	1.86437	PARVA	55742
1554287_at	-0.497957	-0.319926	-5.24269	6.7042e-05	0.0886452	1.86005	TRIM4	89122
241359_at	-0.648019	0.0668788	-5.23714	6.7813e-05	0.088847	1.8491	TLCD2	727910
202693_s_at	0.424787	0.230348	5.23464	6.81637e-05	0.088847	1.84415	STK17A	9263
213294_at	-0.583908	-0.254169	-5.22906	6.89526e-05	0.088847	1.83313	EIF2AK2	5610
220945_x_at	-0.443389	-0.222701	-5.22636	6.93367e-05	0.0890896	1.8278	MANSC1	54682
204856_at	0.453386	0.215827	5.20894	7.18753e-05	0.091065	1.79335	B3GNT3	10331
1553670_at	0.553677	0.0480863	5.20711	7.21466e-05	0.0910793	1.78973	INTS4	92105
227565_at	-0.597507	0.0986191	-5.1963	7.37744e-05	0.0926966	1.76835
1554557_at	0.406013	-0.00853854	5.18697	7.52116e-05	0.0936685	1.74986	ATP11B	23200
212095_s_at	-0.711393	-0.0499345	-5.18594	7.53716e-05	0.0936685	1.74782	MTUS1	57509
209653_at	0.364952	-0.112504	5.18455	7.55881e-05	0.0936815	1.74507	, KPNA4	3840
202082_s_at	0.493491	0.285573	5.18171	7.60338e-05	0.0939778	1.73944	SEC14L1	6397
1556769_a_at	-0.715469	0.46994	-5.17616	7.6911e-05	0.0943629	1.72844
202903_at	-0.502219	-0.39655	-5.17544	7.70253e-05	0.0943629	1.72702	LSM5	23658
239814_at	-0.535607	0.551873	-5.17467	7.71487e-05	0.0943629	1.72549
227578_at	-0.599233	-0.260053	-5.17125	7.76959e-05	0.0943629	1.71871	TMPO-AS1	100128191
228082_at	0.505127	0.148858	5.15087	8.1043e-05	0.097262	1.67828	CLMP	79827
209716_at	-0.624961	0.0477659	-5.14635	8.1804e-05	0.0979169	1.66933	CSF1	1435
216944_s_at	0.590139	0.321807	5.13243	8.41982e-05	0.0985749	1.64167	ITPR1	3708
230399_at	-0.448373	-0.290235	-5.1203	8.63422e-05	0.100135	1.61757
236700_at	0.474485	0.0180431	5.11396	8.74862e-05	0.100553	1.60495	EIF3C	8663, 728689
232122_s_at	-0.602589	0.174589	-5.11364	8.75437e-05	0.100553	1.60432	VEPH1	79674
240259_at	-0.73218	-0.270125	-5.11081	8.80589e-05	0.10089	1.59869	FLRT2	23768
243501_at	-0.486337	-0.285742	-5.10857	8.84701e-05	0.101097	1.59422	ATP5F1	515
218498_s_at	-0.579035	-0.0611082	-5.10539	8.90552e-05	0.101267	1.5879	ERO1A	30001
207605_x_at	-0.52643	0.28745	-5.10204	8.9678e-05	0.101514	1.58122	ZNF117	51351
230871_at	-0.395593	-0.247542	-5.10133	8.98096e-05	0.101514	1.57982	DHX30	22907
227807_at	-0.441593	-0.104223	-5.07675	9.45141e-05	0.105109	1.53086	PARP9	83666
1568611_at	-0.55303	-0.291278	-5.05896	9.8078e-05	0.1077	1.49537
242639_at	-0.642155	-0.43622	-5.058	9.82735e-05	0.1077	1.49346	ICE2	79664
201232_s_at	0.347078	-0.00753888	5.05447	9.89987e-05	0.107756	1.48641	PSMD13	5719
201084_s_at	-0.385	-0.161971	-5.05434	9.90261e-05	0.107756	1.48614	BCLAF1	9774
211323_s_at	0.62182	0.303903	5.04648	0.00010066	0.109272	1.47045	ITPR1	3708
202905_x_at	-0.381427	-0.188007	-5.03189	0.000103765	0.111589	1.44132	NBN	4683
229880_at	-0.527989	-0.172179	-5.03042	0.000104084	0.111589	1.43838
226726_at	0.401354	-0.0284294	5.03037	0.000104095	0.111589	1.43828	MBOAT2	129642
239085_at	-0.625366	0.0171488	-5.02958	0.000104266	0.111589	1.43669	JDP2	122953
216804_s_at	0.340414	0.037535	5.00349	0.000110096	0.115652	1.38452	PDLIM5	10611
213675_at	-0.409433	-0.0680294	-4.99719	0.000111553	0.116643	1.37191
219352_at	-0.462696	-0.243549	-4.98827	0.00011365	0.118118	1.35405	HERC6	55008
229514_at	0.561836	-0.163883	4.98611	0.000114164	0.118285	1.34972	GPATCH2L	55668
231964_at	0.500916	0.300476	4.95246	0.000122483	0.124975	1.28225	BICD1	636
236180_at	-0.563811	0.231068	-4.95187	0.000122635	0.124975	1.28106
203432_at	-0.380445	-0.304652	-4.94588	0.000124181	0.125798	1.26905	TMPO	7112
1552716_at	-0.645443	-0.342838	-4.93865	0.000126076	0.126943	1.25453	SPEF2	79925
225911_at	-0.512904	-0.228557	-4.93732	0.000126427	0.126943	1.25186	NPNT	255743
205487_s_at	-0.56855	-0.275161	-4.93411	0.000127279	0.127037	1.24541	VGLL1	51442
200934_at	-0.369208	-0.151321	-4.93192	0.000127864	0.127037	1.24102	DEK	7913
216237_s_at	-0.673112	-0.424734	-4.9288	0.000128702	0.127037	1.23475	MCM5	4174
218102_at	-0.360434	-0.289683	-4.92861	0.000128754	0.127037	1.23436	DERA	51071
203988_s_at	0.368034	0.187039	4.9172	0.00013187	0.129463	1.21142	FUT8	2530
204015_s_at	0.731116	0.520485	4.91467	0.000132571	0.129676	1.20634	DUSP4	1846
209008_x_at	-0.439708	-0.452403	-4.90228	0.000136061	0.131395	1.18141	KRT8P3, KRT8	3856
244764_at	-0.585915	0.0875135	-4.88902	0.000139897	0.13368	1.15474	HIVEP3	59269
228012_at	-0.399158	-0.177926	-4.88354	0.000141517	0.134663	1.14369	MATR3,	9782
203720_s_at	0.33689	0.169952	4.87868	0.000142966	0.135475	1.13392	ERCC1	2067
230383_x_at	-0.60424	-0.19853	-4.87739	0.000143356	0.135488	1.13131	SLFN5	162394
214106_s_at	-0.427078	-0.242312	-4.87666	0.000143576	0.135488	1.12983	GMDS	2762
207388_s_at	-0.547616	0.141606	-4.86156	0.000148203	0.137963	1.09941	PTGES	9536
208956_x_at	-0.468872	-0.30039	-4.8467	0.000152905	0.140219	1.06944	DUT	1854
235068_at	-0.436452	-0.217744	-4.84147	0.000154596	0.1412	1.05889	ZDHHC21	340481
201036_s_at	-0.525414	-0.276194	-4.83784	0.000155781	0.141434	1.05156	HADH	3033
215417_at	-0.382537	-0.180304	-4.83398	0.000157052	0.141826	1.04377	EXOC6B	23233
244766_at	0.556095	-0.242146	4.83252	0.000157535	0.141826	1.04082	SMG1P7, SMG1	100506060, 23049
205932_s_at	0.537988	0.259168	4.83083	0.000158097	0.141826	1.0374	MSX1	4487
203999_at	-0.459521	-0.0669111	-4.82992	0.000158399	0.141826	1.03558	SYT1	6857
239028_at	-0.492144	-0.288832	-4.82852	0.000158867	0.141965	1.03275	LYPD6	130574
1559094_at	0.498175	-0.0477265	4.82657	0.00015952	0.141982	1.02881	FBXO9	26268
211668_s_at	-0.467888	0.20481	-4.82069	0.000161509	0.142463	1.01692	PLAU	5328
209067_s_at	-0.319628	-0.161274	-4.81222	0.000164413	0.143263	0.999821	HNRNPDL	9987
1555914_a_at	-0.399163	-0.0799697	-4.81025	0.000165096	0.143583	0.995843	EXD3	54932
220129_at	-0.576125	-0.372772	-4.79941	0.000168913	0.146342	0.973916	SOHLH2	54937
205704_s_at	0.4841	-0.0573476	4.79661	0.000169913	0.146404	0.968254	ATP6V0A2	23545
237510_at	0.497873	0.303139	4.7965	0.000169949	0.146404	0.968048
212459_x_at	-0.464639	-0.245479	-4.78712	0.000173345	0.148485	0.949067	SUCLG2	8801
236390_at	-0.361248	-0.189216	-4.78075	0.000175691	0.150212	0.936172	SLX4IP	128710
211932_at	-0.44486	-0.132384	-4.75932	0.000183816	0.154935	0.892794	HNRNPA3	220988, 100616394
203925_at	0.545313	0.122336	4.75078	0.000187163	0.157002	0.875479	GCLM	2730
1554177_a_at	-0.39392	-0.195776	-4.73766	0.000192423	0.159824	0.84889	ATP5S	27109
225750_at	-0.505543	-0.183965	-4.73702	0.000192685	0.159824	0.847583	ERO1A	30001
229498_at	-0.573093	-0.255712	-4.73389	0.000193961	0.159824	0.84125	MBNL3	55796
200650_s_at	-0.288833	-0.0607403	-4.73129	0.00019503	0.160296	0.835976	LDHA,	3939
225007_at	-0.477826	-0.167812	-4.72803	0.000196382	0.160654	0.829351	G3BP1	10146
1560019_at	-0.717409	0.362618	-4.72332	0.000198347	0.161681	0.819797	DLGAP1-AS2
203343_at	0.519397	0.371587	4.7022	0.00020741	0.167353	0.776927	UGDH	7358
1570153_at	-0.416853	-0.329523	-4.70196	0.000207513	0.167353	0.776451	CCDC169	728591
228315_at	0.394662	0.110737	4.68805	0.000213719	0.171775	0.74818	ZMAT3	64393
217721_at	-0.525203	-0.432652	-4.68442	0.000215365	0.172349	0.740818	SEPT7	989
226998_at	-0.387808	-0.302772	-4.68197	0.000216487	0.172752	0.735833	NAA15	80155
208804_s_at	-0.384739	-0.184788	-4.67974	0.000217515	0.173268	0.73129	SRSF6	6431
207339_s_at	-0.659343	0.151851	-4.67537	0.000219536	0.174573	0.722415	LTB	4050
218593_at	0.287066	-0.0595099	4.63268	0.000240341	0.18687	0.635546	RBM28	55131
205519_at	-0.758524	-0.428627	-4.63051	0.000241454	0.187414	0.631116	WDR76	79968
1562062_at	0.326798	-0.110191	4.62534	0.000244115	0.188599	0.620599
220397_at	-0.48334	-0.201095	-4.62005	0.000246874	0.189662	0.609818	MDM1	56890
210942_s_at	0.427769	0.227384	4.61979	0.000247013	0.189662	0.609278	ST3GAL6	10402
215380_s_at	-0.320924	-0.184715	-4.60671	0.000253971	0.193175	0.582625	GGCT	79017
204014_at	0.888873	0.577566	4.60417	0.000255344	0.193847	0.577456	DUSP4	1846
201890_at	-0.412172	-0.424592	-4.6013	0.000256908	0.194219	0.571595	RRM2	6241
230003_at	-0.630002	-0.238367	-4.60104	0.000257052	0.194219	0.571057	SLC16A7	9194
213355_at	0.477209	0.187706	4.59897	0.000258182	0.194427	0.56685	ST3GAL6	10402
209351_at	-0.65726	0.00482516	-4.58979	0.00026327	0.196653	0.548129	KRT14	3861
201951_at	-0.323347	0.0846873	-4.58932	0.000263536	0.196653	0.54716	ALCAM	214
222016_s_at	-0.772006	0.545329	-4.58916	0.000263623	0.196653	0.546844	ZSCAN31	64288
201519_at	-0.32776	-0.198682	-4.58654	0.000265098	0.196653	0.541491	TOMM70	9868
205018_s_at	-0.925442	0.065153	-4.5859	0.00026546	0.196653	0.540181	MBNL2	10150
203719_at	0.318774	0.11375	4.5859	0.000265461	0.196653	0.540176	ERCC1	2067
227332_at	-0.527938	-0.000989021	-4.57569	0.000271285	0.199295	0.519357	PXN-AS1
219426_at	0.346155	0.0740284	4.56994	0.000274629	0.200561	0.507607	AGO3	192669
202748_at	-0.694516	0.0850469	-4.55107	0.000285883	0.206731	0.469078	GBP2	2634
1569322_at	-0.31437	-0.206624	-4.54264	0.000291061	0.209583	0.45186	LINC00857	439990
1558322_a_at	0.781093	0.503687	4.54166	0.000291671	0.209583	0.449852	PAQR9	344838
209230_s_at	-0.781891	-0.00130559	-4.54089	0.000292149	0.209595	0.448281	NUPR1	26471
229390_at	-0.55778	-0.0849577	-4.52838	0.000300045	0.212541	0.422699	FAM26F	441168
230240_at	0.496422	0.277748	4.52483	0.000302326	0.212541	0.415436
240831_at	-0.469575	0.0548313	-4.52477	0.000302359	0.212541	0.415329
225310_at	-0.368584	-0.337356	-4.51964	0.000305685	0.2138	0.404836	RBMX	27316
227333_at	0.295687	0.100917	4.51916	0.000306	0.2138	0.403849	DCUN1D3	123879
209824_s_at	0.378519	0.185025	4.5159	0.000308133	0.21496	0.397187	ARNTL	406
238135_at	0.741143	0.324507	4.50926	0.00031253	0.216494	0.383596	AGTRAP	57085
210143_at	0.743496	0.518093	4.50905	0.000312668	0.216494	0.383172	ANXA10	11199
215629_s_at	-0.543865	-0.724779	-4.50899	0.000312712	0.216494	0.383037	DLEU2, DLEU2L	406948
212552_at	0.656861	0.508417	4.49266	0.000323797	0.222812	0.349625	HPCAL1	3241
218901_at	-0.566333	0.0823895	-4.47846	0.000333762	0.227945	0.320554	PLSCR4	57088
229633_at	-0.328718	-0.125266	-4.47578	0.000335679	0.22891	0.315062
200898_s_at	0.397791	-0.019083	4.47164	0.00033866	0.230253	0.306581	MGEA5	10724
230974_at	-0.431611	-0.316484	-4.46972	0.000340055	0.230856	0.30264	DDX19B	11269
221931_s_at	-0.376286	-0.182763	-4.45866	0.000348185	0.234277	0.279981	SEH1L	81929
236514_at	-0.483797	-0.255052	-4.45742	0.00034911	0.234552	0.277437	ACOT8	10005
203455_s_at	0.380603	0.197594	4.45302	0.000352406	0.236269	0.268424	SAT1	6303
233105_at	0.634601	-0.305171	4.44906	0.000355401	0.237377	0.260308
202061_s_at	-0.33635	0.0322955	-4.4432	0.000359878	0.239593	0.248302	SEL1L	6400
202341_s_at	0.382237	0.235555	4.44124	0.00036139	0.239618	0.244282	TRIM2	23321
1555841_at	0.297414	0.280274	4.42903	0.000370954	0.241926	0.219236	MSANTD3	91283
225710_at	-0.376348	-0.314156	-4.42604	0.000373332	0.242932	0.213108	GNB4	59345
210355_at	0.501963	0.223367	4.41793	0.000379864	0.246126	0.196474	PTHLH	5744
235875_at	-0.428591	-0.247966	-4.41224	0.00038452	0.247731	0.184793
236595_at	-0.30868	0.0767217	-4.40762	0.000388344	0.249488	0.175305
210824_at	0.393929	0.138315	4.39636	0.000397817	0.254006	0.152197
228923_at	0.542484	0.379041	4.38897	0.00040416	0.255677	0.137029	S100A6	6277
240452_at	0.496372	-0.106568	4.38206	0.000410191	0.258414	0.122828	GSPT1	2935
202413_s_at	-0.345406	-0.198564	-4.38079	0.000411311	0.258761	0.120215	USP1	7398
234863_x_at	-0.663078	-0.334455	-4.37382	0.0004175	0.261051	0.105897	FBXO5	26271
46167_at	0.409483	0.00375979	4.37135	0.000419711	0.261872	0.100832	MROH7-TTC4, TTC4	7268
205227_at	-0.434954	-0.234694	-4.36705	0.000423596	0.263564	0.0919983	IL1RAP	3556
218574_s_at	0.373188	-0.197991	4.36643	0.000424161	0.263564	0.0907216	LMCD1	29995
229552_at	-0.583648	0.0334002	-4.36315	0.000427153	0.2647	0.0839823	HRK	8739
243024_at	0.411863	0.0942879	4.3612	0.000428949	0.264785	0.0799597	ZNF394	84124
202854_at	-0.317327	-0.234483	-4.36061	0.000429483	0.264785	0.0787668	HPRT1	3251
210592_s_at	0.340112	0.259005	4.35676	0.000433044	0.265661	0.0708508	SAT1	6303
211960_s_at	0.279275	0.0238505	4.35239	0.000437124	0.265982	0.0618623	RAB7A	7879
201325_s_at	0.42474	0.371399	4.35212	0.000437382	0.265982	0.0612968	EMP1	2012
225173_at	-0.392493	-0.278831	-4.35169	0.000437778	0.265982	0.0604293	ARHGAP18	93663
226990_at	-0.360838	-0.229508	-4.35141	0.000438042	0.265982	0.0598504	CAPRIN1	4076
212508_at	0.313611	0.130862	4.34742	0.000441812	0.266862	0.0516367	MOAP1	64112
1552370_at	-0.510228	-0.264047	-4.34672	0.000442476	0.266862	0.0501965	C4orf33	132321
206821_x_at	0.340851	0.153482	4.33911	0.000449756	0.268596	0.034554	AGFG2	3268
202351_at	-0.340856	0.150684	-4.33766	0.000451156	0.268596	0.0315741	ITGAV	3685
223687_s_at	0.606653	0.388541	4.33506	0.000453684	0.26966	0.0262191	LY6K	54742
210688_s_at	0.615433	0.289689	4.32902	0.000459597	0.272551	0.0138069	CPT1A	1374
222262_s_at	0.368979	0.164753	4.32807	0.000460534	0.272665	0.0118542	ETNK1	55500
239792_at	0.395583	-0.102535	4.31912	0.000469469	0.275177	-0.00656407	UBL7-AS1	440288
212763_at	-0.290406	-0.13996	-4.31551	0.000473119	0.276529	-0.0139867	CAMSAP2	23271
213762_x_at	-0.42995	-0.156721	-4.31444	0.000474208	0.276529	-0.0161902	RBMX, , RBMXP2	27316
1566256_s_at	-0.385884	-0.250327	-4.31141	0.000477299	0.277975	-0.0224159
45714_at	-0.723079	0.184558	-4.3058	0.000483083	0.279119	-0.0339601	HCFC1R1	54985
177_at	-0.406989	0.111442	-4.30551	0.000483388	0.279119	-0.0345656	PLD1	5337
212033_at	-0.294505	-0.162149	-4.30107	0.000488014	0.280477	-0.0436933	RBM25	58517
211547_s_at	-0.551045	-0.386107	-4.29553	0.000493864	0.282285	-0.0551131	PAFAH1B1	5048
206822_s_at	0.570548	0.300184	4.29217	0.000497441	0.283352	-0.0620289	L3MBTL1	26013
213995_at	-0.376505	-0.237322	-4.29053	0.000499195	0.283469	-0.0654027	ATP5S	27109
221677_s_at	-0.344937	-0.170929	-4.28556	0.000504549	0.284893	-0.0756262	DONSON	29980
1554822_at	-0.444164	-0.281212	-4.28446	0.000505745	0.284893	-0.0778954	PHTF2	57157
219595_at	-0.349163	-0.212001	-4.27862	0.00051213	0.287582	-0.0899159	ZNF26	7574
209275_s_at	0.366506	0.291962	4.27749	0.000513379	0.287928	-0.0922508	, CLN3	1201
238822_at	-0.418771	-0.269394	-4.27286	0.000518518	0.288674	-0.101795
200776_s_at	0.458631	0.0128674	4.25948	0.000533639	0.293168	-0.129337	BZW1P1, BZW1, BZW1P2	9689
219353_at	-0.563409	-0.36574	-4.25917	0.000534002	0.293168	-0.129989	NHLRC2	374354
227475_at	0.585225	0.434307	4.25117	0.000543268	0.297358	-0.146471	FOXQ1	94234
228493_at	-0.39475	-0.238328	-4.24697	0.0005482	0.299697	-0.155131	NKAP	79576
1570253_a_at	0.470571	-0.0679568	4.24622	0.000549085	0.29982	-0.156675	RHEBL1	121268
232058_at	0.463604	0.0548526	4.24527	0.000550199	0.300068	-0.158617
218442_at	0.369771	-0.0133148	4.232	0.00056614	0.303874	-0.18598	MROH7-TTC4, TTC4	7268
208732_at	-0.408244	-0.20513	-4.22681	0.000572492	0.304558	-0.196667	RAB2A	5862
225877_at	-0.351999	0.0541751	-4.21747	0.00058412	0.308855	-0.215928	TYSND1	219743
227452_at	-0.453251	0.364817	-4.21303	0.000589736	0.309746	-0.225093	LINC00511	400619
210986_s_at	-0.372412	-0.208863	-4.20881	0.000595116	0.312085	-0.233793	TPM1	7168
209875_s_at	1.42177	1.10017	4.19877	0.000608115	0.315625	-0.254488	SPP1	6696
218656_s_at	-0.398179	-0.290724	-4.19843	0.000608561	0.315625	-0.255189	LHFP	10186
214976_at	0.365683	0.0395528	4.19727	0.000610091	0.316058	-0.257595	RPL13	6137
228281_at	0.34386	-0.035668	4.18673	0.000624102	0.321122	-0.279341	DDIAS	220042
208833_s_at	-0.316713	-0.156894	-4.18465	0.000626904	0.322199	-0.28363	ATXN10	25814
205919_at	0.449174	0.137938	4.17546	0.000639433	0.327528	-0.302579	HBE1	3046
209932_s_at	-0.500058	-0.333793	-4.1725	0.000643534	0.328487	-0.308702	DUT	1854
233674_at	0.380231	0.21329	4.16855	0.000649035	0.329408	-0.316852
1552378_s_at	0.333039	0.116754	4.16257	0.000657444	0.330794	-0.329179	RDH10	157506
242053_at	-0.44036	-0.279595	-4.1618	0.000658537	0.330874	-0.330768
222843_at	-0.314428	-0.225737	-4.15929	0.000662117	0.331496	-0.335959	FIGNL1	63979
232138_at	-0.557786	0.160032	-4.15856	0.000663155	0.331496	-0.33746
216568_x_at	-0.355422	-0.321933	-4.15833	0.000663492	0.331496	-0.337946
223761_at	-0.517211	0.443816	-4.15461	0.000668828	0.333204	-0.345615	FGF19	9965
217299_s_at	-0.43704	-0.224344	-4.14977	0.000675847	0.334139	-0.35561	NBN	4683
228904_at	-0.431912	-0.256295	-4.13472	0.000698139	0.340351	-0.386678	HOXB3	3213
204767_s_at	-0.378595	-0.177929	-4.1331	0.000700579	0.341175	-0.390018	FEN1	2237
204658_at	-0.356754	-0.399045	-4.13172	0.000702669	0.341409	-0.392869	TRA2A	29896
239577_at	-0.476205	-0.262877	-4.13049	0.000704537	0.341526	-0.39541
235456_at	-0.416669	0.428264	-4.13001	0.000705272	0.341526	-0.396408
211814_s_at	-1.06814	-0.484061	-4.12915	0.000706579	0.341537	-0.398181	CCNE2	9134
227545_at	-0.321197	-0.292646	-4.1274	0.000709253	0.342103	-0.401797	BARD1	580
212242_at	0.276845	0.173255	4.12268	0.000716506	0.344496	-0.411536	TUBA4A	7277
203542_s_at	0.489426	0.403281	4.11888	0.000722405	0.346243	-0.419384	KLF9	687
201233_at	0.365732	-0.0295298	4.11245	0.000732491	0.348507	-0.432654	PSMD13	5719
222680_s_at	-0.463986	-0.259066	-4.10751	0.000740351	0.350586	-0.44287	DTL	51514
223384_s_at	0.3693	0.364974	4.1064	0.000742121	0.350586	-0.445156	TRIM4	89122
208747_s_at	-0.439902	0.120249	-4.1031	0.000747434	0.35098	-0.451982	C1S	716
236453_at	0.356225	-0.145077	4.0986	0.000754723	0.352358	-0.46127
205992_s_at	-0.434157	0.228686	-4.09824	0.000755305	0.352358	-0.462008	IL15	3600
230757_at	-0.422319	-0.330458	-4.09537	0.000759998	0.354184	-0.467935
205583_s_at	-0.294293	-0.30758	-4.0942	0.000761931	0.354722	-0.470367	ALG13	79868
201038_s_at	-0.484495	-0.292453	-4.09081	0.000767517	0.355605	-0.477357	ANP32A	8125
213647_at	-0.4102	-0.266404	-4.09058	0.0007679	0.355605	-0.477834	DNA2	1763
239302_s_at	-0.642747	-0.511392	-4.08642	0.000774831	0.357245	-0.486432
230362_at	-0.436796	-0.218524	-4.08557	0.00077626	0.357245	-0.488195	INPP5F	22876
223722_at	0.469395	-0.0161409	4.08526	0.000776777	0.357245	-0.488832	DNAJC12	56521
203389_at	0.338198	0.20886	4.07881	0.000787671	0.361261	-0.502158	KIF3C	3797
230721_at	0.483283	0.407749	4.07057	0.000801811	0.364702	-0.519182	C16orf52	730094, 102725138
218158_s_at	-0.334904	-0.168646	-4.06534	0.000810921	0.367925	-0.529991	APPL1	26060
227748_at	-0.362845	-0.217904	-4.06133	0.000817981	0.369471	-0.538284	RBMXL1	494115
202330_s_at	-0.323868	-0.259158	-4.0587	0.000822633	0.370469	-0.54371	UNG	7374
223159_s_at	-0.372589	0.0352344	-4.05375	0.000831471	0.372023	-0.553933	NEK6	10783
221778_at	0.373158	0.251461	4.05336	0.000832173	0.372023	-0.55474	KDM7A	80853
1555606_a_at	0.433837	0.256484	4.05083	0.000836734	0.373491	-0.559969	GDPD1	284161
218537_at	-0.548587	0.190414	-4.04861	0.000840764	0.374005	-0.564565	HCFC1R1	54985
229297_at	0.440135	0.231729	4.0476	0.000842592	0.374005	-0.566641	GPATCH2L	55668
218108_at	-0.263678	-0.14591	-4.03642	0.000863208	0.381193	-0.589763	UBR7	55148
230426_at	-0.474245	-0.28606	-4.02749	0.000880016	0.383771	-0.608207	DLD	1738
208920_at	-0.838951	-0.370519	-4.0214	0.000891678	0.385993	-0.620797	SRI	6717
227103_s_at	0.332	0.227997	4.01872	0.000896854	0.38739	-0.626332	ECE2	9718
211363_s_at	-0.285427	-0.235584	-4.00658	0.000920707	0.393592	-0.651432	, MTAP	4507
208672_s_at	-0.336042	-0.355124	-4.00159	0.000930696	0.397483	-0.66175	SRSF3	6428
203896_s_at	-0.440364	-0.300019	-4.00001	0.000933883	0.39773	-0.665018	PLCB4	5332
1558501_at	-0.570035	-0.0290781	-3.99892	0.0009361	0.397929	-0.667285	DNM3	26052
223556_at	-0.361288	-0.201603	-3.9974	0.000939164	0.398486	-0.67041	HELLS	3070
205676_at	0.59449	0.43452	3.98897	0.00095645	0.40207	-0.687846	CYP27B1	1594
231411_at	-0.399881	-0.271144	-3.98813	0.000958199	0.402225	-0.689592
225897_at	-0.596063	-0.299924	-3.98673	0.000961089	0.402903	-0.692471	MARCKS	4082
37547_at	-0.413803	0.254357	-3.98508	0.000964523	0.40397	-0.695881	BBS9	27241
225968_at	0.281756	0.191742	3.98243	0.000970073	0.404433	-0.701366	PRICKLE2	166336
213988_s_at	0.435912	0.321013	3.98119	0.000972678	0.40453	-0.703929	SAT1	6303
242868_at	0.469272	0.11675	3.97872	0.0009779	0.405507	-0.709048
235681_at	-0.401073	0.161065	-3.96469	0.00100803	0.414625	-0.738054
1569241_a_at	0.476045	-0.0973597	3.96357	0.00101047	0.414813	-0.740366	ZNF93	81931
231930_at	0.498984	0.235913	3.96107	0.00101595	0.416311	-0.745535	ELMOD1	55531, 643923
225919_s_at	0.353505	0.0276425	3.95815	0.00102239	0.417331	-0.751575	C9orf72	203228
226889_at	-0.502756	-0.270548	-3.95519	0.00102896	0.419	-0.757696	WDR35	57539
218979_at	-0.262739	-0.156296	-3.95314	0.00103352	0.420334	-0.761919	RMI1	80010
219067_s_at	-0.333747	-0.23369	-3.95289	0.00103409	0.420334	-0.762444	NSMCE4A	54780
223140_s_at	0.265244	-0.0567602	3.94296	0.00105655	0.426794	-0.782977	DHX36	170506
1564371_a_at	-0.629376	-0.351433	-3.94006	0.0010632	0.42863	-0.788973	CASC2	255082
203895_at	-0.442199	-0.260913	-3.93836	0.00106713	0.429164	-0.792501	PLCB4	5332
239823_at	-0.443173	0.0166049	-3.93515	0.00107455	0.431005	-0.799122
204334_at	-0.396157	-0.141252	-3.93414	0.00107691	0.431568	-0.801213	KLF7	8609
224826_at	0.38482	-0.454044	3.93356	0.00107826	0.43173	-0.802411	GPCPD1	56261
209921_at	0.456544	0.358335	3.92925	0.00108836	0.433866	-0.811322	SLC7A11	23657
242811_x_at	0.576263	0.230087	3.9243	0.0011001	0.43564	-0.821566
236691_at	-0.504565	-0.261574	-3.92428	0.00110014	0.43564	-0.821601
204126_s_at	-0.384292	-0.315094	-3.92117	0.00110757	0.437178	-0.828034	CDC45	8318
217356_s_at	-0.297526	-0.0745215	-3.91762	0.00111612	0.437463	-0.835379	PGK1	5230
235123_at	-0.376473	-0.251314	-3.89855	0.00116316	0.447979	-0.874811
235453_at	0.465826	-0.137773	3.89523	0.00117155	0.449308	-0.881673	TOR1AIP2	163590
217678_at	0.495402	0.33664	3.89334	0.00117637	0.450774	-0.885589	SLC7A11	23657
230532_at	-0.361827	-0.260169	-3.89021	0.00118435	0.451988	-0.89205	CXorf38	159013
238856_s_at	-0.651772	-0.452243	-3.89015	0.00118451	0.451988	-0.892173	MIR103A2	406896
239282_at	-0.528442	-0.39212	-3.8873	0.00119184	0.453267	-0.898069	CEP83	51134
201428_at	0.552635	0.290251	3.88402	0.00120034	0.454995	-0.904855	CLDN4	1364
231552_at	0.31175	-0.101088	3.88281	0.0012035	0.455684	-0.907362
1569631_at	0.302602	-0.178394	3.88046	0.00120963	0.456327	-0.912218	NMNAT1,	64802
225446_at	-0.403365	-0.321582	-3.88038	0.00120983	0.456327	-0.912376	BRWD1	54014
1552546_a_at	0.670259	-0.0504068	3.8793	0.00121267	0.456606	-0.914609	LETM2	137994
217150_s_at	-0.282271	-0.375466	-3.87549	0.00122272	0.456986	-0.922491
214141_x_at	-0.251295	-0.346587	-3.86289	0.00125656	0.464571	-0.948549	SRSF7	6432
210609_s_at	0.408506	0.267716	3.86173	0.0012597	0.464571	-0.950934	TP53I3	9540
1559322_at	-0.699522	0.305496	-3.86149	0.00126038	0.464571	-0.951448
204835_at	-0.28335	-0.212971	-3.85997	0.00126452	0.465124	-0.954579	POLA1	5422
218581_at	0.364118	0.226294	3.85924	0.00126653	0.465124	-0.956096	ABHD4	63874
229396_at	0.66581	0.395359	3.85716	0.00127223	0.465172	-0.960386	OVOL1	5017
203302_at	-0.398891	-0.24231	-3.85344	0.00128252	0.46631	-0.968076	DCK	1633
224851_at	-0.43444	-0.237745	-3.85039	0.00129102	0.468651	-0.974378	CDK6	1021
220419_s_at	-0.255365	0.0451824	-3.84717	0.00130006	0.471554	-0.981034	USP25	29761
1556212_x_at	-0.432152	-0.3762	-3.84235	0.00131373	0.472369	-0.991016
217529_at	0.865095	0.537079	3.83744	0.00132778	0.476291	-1.00117	ORAI2	80228
243918_at	0.536062	0.348434	3.83349	0.00133919	0.478874	-1.00933	KLHL24	54800
238977_at	-0.765764	-0.562109	-3.83223	0.00134284	0.479426	-1.01193	MCM6	4175
231332_at	0.412566	0.454555	3.82734	0.00135714	0.482424	-1.02204
207156_at	-0.419053	0.17828	-3.82718	0.0013576	0.482424	-1.02236	HIST1H2AG	8969
227865_at	-0.378799	-0.369848	-3.82347	0.00136858	0.484676	-1.03005	IDNK	414328
202284_s_at	0.677123	0.377733	3.81728	0.00138703	0.48755	-1.04283	CDKN1A	1026
219789_at	0.721094	0.537925	3.81506	0.00139372	0.48881	-1.04741	NPR3	4883
201111_at	-0.300905	-0.286241	-3.81323	0.00139927	0.490102	-1.0512	CSE1L	1434
228842_at	-0.375673	-0.201299	-3.81113	0.00140566	0.490774	-1.05555
202503_s_at	-0.366681	-0.223325	-3.81055	0.00140741	0.490774	-1.05674	KIAA0101	9768
221581_s_at	0.602888	0.370554	3.80998	0.00140915	0.490774	-1.05792	LAT2	7462
1568812_at	0.303022	0.433649	3.79251	0.00146351	0.50547	-1.09402		100507140
202412_s_at	-0.355862	-0.286168	-3.79216	0.00146463	0.50547	-1.09475	USP1	7398
220617_s_at	-0.335624	-0.186442	-3.79209	0.00146486	0.50547	-1.0949	ZNF532	55205
219814_at	-0.496241	-0.285272	-3.77541	0.00151876	0.519099	-1.12935	MBNL3	55796
220682_s_at	0.400562	0.0772791	3.77534	0.00151901	0.519099	-1.12951
37793_r_at	-0.37593	-0.196578	-3.76646	0.00154851	0.5254	-1.14785	RAD51D	5892
209460_at	-0.430268	0.105277	-3.76441	0.00155542	0.525649	-1.15209	ABAT	18
239841_at	-0.390356	-0.321738	-3.76426	0.00155592	0.525649	-1.1524
229983_at	-0.410324	-0.137437	-3.76415	0.00155629	0.525649	-1.15263	TIGD2	166815
212151_at	-0.261702	-0.0126884	-3.76404	0.00155667	0.525649	-1.15286	PBX1	5087
243413_at	-0.62439	-0.268842	-3.76129	0.00156597	0.527614	-1.15853	TTC30B	150737
229553_at	0.378804	0.192119	3.75915	0.00157324	0.528969	-1.16295	PGM2L1	283209
219895_at	-0.79863	0.281687	-3.75768	0.00157827	0.530189	-1.166	TMEM255A	55026
242289_at	-0.415285	-0.254793	-3.7557	0.00158506	0.531684	-1.17009	MRPL42	28977
219288_at	-0.339663	-0.213268	-3.75421	0.00159019	0.532225	-1.17316	C3orf14	57415
1554678_s_at	-0.30005	-0.214291	-3.74516	0.00162168	0.538408	-1.19185	HNRNPDL	9987
221679_s_at	0.374173	0.291991	3.74402	0.00162568	0.538678	-1.1942	ABHD6	57406
1557285_at	-0.622616	-0.279909	-3.7391	0.0016431	0.542352	-1.20436
227027_at	-0.364091	0.0816787	-3.73782	0.00164767	0.543351	-1.207	GFPT1	2673
215111_s_at	0.283653	0.136133	3.73759	0.00164852	0.543351	-1.20749	TSC22D1	8848
219518_s_at	0.33358	0.294775	3.73613	0.00165372	0.544649	-1.2105	ELL3,	80237
226760_at	-0.284021	-0.179279	-3.73115	0.00167165	0.54765	-1.22077	MBTPS2	51360
212980_at	-0.48413	-0.432687	-3.73001	0.00167579	0.54765	-1.22313	AHSA2	130872
231929_at	-0.549335	-0.27932	-3.72928	0.00167847	0.548063	-1.22465	IKZF2	22807
219469_at	-0.339177	-0.186085	-3.72782	0.00168379	0.548257	-1.22767	DYNC2H1	79659
206943_at	0.357454	0.227283	3.71322	0.00173792	0.556682	-1.25781	TGFBR1	7046
229028_s_at	-0.28473	-0.298571	-3.70939	0.00175239	0.559349	-1.26571	ARL17B	51326, 100506084, 100996709
227899_at	-0.341444	0.130406	-3.70633	0.00176404	0.56213	-1.27202	VIT	5212
226747_at	-0.246203	0.0766918	-3.70613	0.00176481	0.56213	-1.27243	TXNDC16	57544
1554067_at	0.40279	-0.145359	3.69926	0.00179128	0.567079	-1.28661	C12orf66	144577
235502_at	-0.377921	-0.125741	-3.69538	0.00180641	0.569795	-1.29462	PPP2CA	5515
201272_at	0.297833	0.377995	3.6913	0.00182245	0.572867	-1.30304	AKR1B1	231
212613_at	-0.35908	0.0538291	-3.68639	0.00184198	0.576616	-1.31319	BTN3A2	11118
243010_at	-0.310605	-0.156943	-3.6803	0.00186645	0.582672	-1.32575	MSI2	124540
222962_s_at	-0.438639	-0.397948	-3.6788	0.00187253	0.584169	-1.32885	MCM10	55388
209160_at	0.793068	0.765987	3.67116	0.00190376	0.590658	-1.34459	AKR1C3	8644
223124_s_at	0.28317	-0.0576372	3.66941	0.00191103	0.591923	-1.34822	PITHD1	57095
219952_s_at	0.35885	0.202529	3.66718	0.00192027	0.593767	-1.35281	MCOLN1	57192
218941_at	0.224976	-0.053019	3.66563	0.00192674	0.59496	-1.35601	FBXW2	26190
202483_s_at	-0.239422	-0.180223	-3.66407	0.00193324	0.596562	-1.35922	RANBP1,	5902
223482_at	0.252947	0.22826	3.65451	0.00197372	0.603729	-1.37894	TMEM120A	83862
1567107_s_at	0.517192	-0.0193275	3.64957	0.00199495	0.608361	-1.38912	TPM4	7171
241312_at	-0.884733	0.108084	-3.64834	0.00200031	0.608361	-1.39167	LINC00911	100996280
230277_at	0.406799	0.160792	3.64815	0.00200111	0.608361	-1.39205
224159_x_at	0.222371	0.156922	3.64269	0.00202496	0.611792	-1.40332	TRIM4	89122
223315_at	-0.885807	-0.013507	-3.6379	0.00204607	0.614291	-1.41319	NTN4	59277
212311_at	0.360811	0.334557	3.62944	0.00208394	0.620744	-1.43063	SEL1L3	23231
203264_s_at	-0.610639	-0.372475	-3.62785	0.00209111	0.621613	-1.4339	ARHGEF9	23229
211213_at	0.286496	-0.0691682	3.62604	0.00209934	0.621613	-1.43764	ORC5	5001
235114_x_at	0.325495	-0.169023	3.62577	0.00210054	0.621613	-1.43818	HOOK3	84376
200822_x_at	-0.214522	-0.0589035	-3.62281	0.00211407	0.621613	-1.44429	TPI1, TPI1P1	7167
205498_at	-0.507336	0.0889571	-3.62229	0.00211647	0.621613	-1.44537	GHR	2690
204348_s_at	-0.329358	-0.131381	-3.61551	0.00214776	0.627429	-1.45932	AK4P3, AK4, AK4P1	205
207087_x_at	0.283764	0.119339	3.61154	0.00216632	0.629962	-1.4675	ANK1	286
229303_at	-0.476702	-0.192018	-3.61153	0.00216637	0.629962	-1.46753	SF3B1	23451
208161_s_at	0.808155	0.56051	3.6035	0.0022044	0.637103	-1.48407	ABCC3	8714
200777_s_at	0.260269	7.20512e-05	3.60045	0.00221902	0.63881	-1.49036	BZW1	9689
202637_s_at	-0.503959	0.121825	-3.59646	0.0022383	0.642194	-1.49858	ICAM1	3383
1554266_at	-0.337273	-0.229709	-3.59503	0.00224524	0.643507	-1.50152
240358_at	0.324595	0.206562	3.59103	0.00226477	0.647136	-1.50975
244779_at	-0.329388	-0.248559	-3.59056	0.00226706	0.647136	-1.51072	ZDHHC2	51201
1559005_s_at	-0.561839	-0.429181	-3.59035	0.00226813	0.647136	-1.51116	CNTLN	54875
228366_at	0.320794	0.256093	3.58986	0.00227053	0.647136	-1.51217
218782_s_at	-0.326369	-0.277362	-3.58585	0.00229033	0.651096	-1.52042	ATAD2	29028
204532_x_at	0.473588	0.567154	3.57764	0.00233145	0.657851	-1.53733	UGT1A9, UGT1A4, UGT1A10, UGT1A3, UGT1A6, UGT1A8, UGT1A7, UGT1A1, UGT1A5	54600, 54657, 54575, 54659, 54578, 54576, 54577, 54658, 54579
1559675_at	0.297568	0.206099	3.57664	0.0023365	0.65808	-1.53939
218493_at	-0.241894	-0.231477	-3.57477	0.00234595	0.659891	-1.54322	SNRNP25	79622
200737_at	-0.391832	-0.178021	-3.56738	0.00238384	0.664952	-1.55845	PGK1	5230
214785_at	-0.485511	-0.251759	-3.56243	0.00240952	0.669498	-1.56863	VPS13A	23230
222666_s_at	0.25824	-0.111551	3.55502	0.00244851	0.677847	-1.58387	RCL1	10171
201072_s_at	-0.293941	-0.218049	-3.55343	0.00245696	0.678535	-1.58714	SMARCC1	6599
203438_at	-0.565977	0.284292	-3.54711	0.00249077	0.685375	-1.60012	STC2	8614
207312_at	0.300756	0.217213	3.5451	0.00250166	0.686805	-1.60427	PHKG1	5260
212665_at	0.318577	0.265805	3.53298	0.00256816	0.697309	-1.62918	TIPARP	25976
227680_at	-0.264414	-0.279032	-3.53261	0.00257025	0.697309	-1.62995	ZNF326	284695
202691_at	-0.354206	-0.288995	-3.52699	0.0026017	0.701885	-1.64149	SNRPD1	6632
221298_s_at	0.30829	0.180086	3.52153	0.00263266	0.707302	-1.65272	SLC22A8	9376
200738_s_at	-0.24785	-0.0571657	-3.5183	0.00265114	0.710678	-1.65936	PGK1	5230
238055_at	-0.330898	0.0861335	-3.51651	0.00266139	0.712496	-1.66303
213139_at	0.35472	0.254974	3.51209	0.00268697	0.717655	-1.6721	SNAI2	6591
237388_at	0.418619	-0.0990052	3.51155	0.00269016	0.718085	-1.67323
209974_s_at	-0.244098	-0.108511	-3.50918	0.00270398	0.719414	-1.67809	BUB3	9184
203518_at	0.364833	0.243088	3.50849	0.00270803	0.719563	-1.67951	LYST	1130
219185_at	-0.262181	-0.121188	-3.49728	0.0027745	0.731625	-1.70252	SIRT5	23408
229428_at	-0.418418	-0.499971	-3.49612	0.00278151	0.732654	-1.70491	TIMM23B	100652748
204768_s_at	-0.351834	-0.176219	-3.49595	0.00278252	0.732654	-1.70525	FEN1	2237
238599_at	-0.426927	-0.244493	-3.4958	0.0027834	0.732654	-1.70556	IRAK1BP1	134728
242138_at	-0.357423	-0.257092	-3.49514	0.00278742	0.73281	-1.70692	DLX1	1745
235130_at	-0.38967	-0.277096	-3.48341	0.00285908	0.743964	-1.731	MIR103A2	406896
209264_s_at	-0.320677	-0.169218	-3.48253	0.0028645	0.744144	-1.7328	TSPAN4	7106
1554486_a_at	-0.375558	-0.347329	-3.47846	0.00288986	0.747696	-1.74116	GFOD1	54438
225143_at	-0.237778	-0.12941	-3.47693	0.00289942	0.749741	-1.74429	SFXN4	119559
226727_at	-0.246757	-0.18989	-3.47412	0.0029171	0.753458	-1.75005	CISD3, MLLT6	284106, 4302
212930_at	-0.265802	0.185266	-3.46864	0.00295192	0.756863	-1.7613	ATP2B1	490
213017_at	0.270731	0.25302	3.46798	0.00295614	0.75752	-1.76266	ABHD3	171586
211386_at	0.420877	-0.139715	3.46543	0.00297245	0.759846	-1.76787
239010_at	0.399644	0.211887	3.46525	0.00297363	0.759846	-1.76825
234597_at	-0.269515	-0.391332	-3.46312	0.00298738	0.760383	-1.77262
238646_at	-0.337951	-0.304157	-3.4627	0.00299007	0.760536	-1.77348
210752_s_at	0.214734	0.0497805	3.46251	0.00299132	0.760536	-1.77387	MLX	6945
236578_at	0.283074	0.206645	3.46153	0.00299766	0.760802	-1.77588
203778_at	-0.321382	0.168574	-3.46082	0.00300225	0.761052	-1.77733	MANBA	4126
1557081_at	-0.288857	-0.341435	-3.46046	0.00300459	0.761052	-1.77807	RBM25	58517
209641_s_at	0.443766	0.460237	3.46039	0.00300507	0.761052	-1.77822	ABCC3	8714
1555284_at	0.504197	0.300555	3.45497	0.00304048	0.765542	-1.78932	ALS2	57679
212481_s_at	0.522892	-0.0755042	3.45152	0.00306328	0.768944	-1.7964	TPM4,	7171
1559942_at	-0.505425	-0.358011	-3.45055	0.00306969	0.769838	-1.79839	MDFIC	29969
208999_at	-0.339326	-0.182016	-3.44973	0.00307513	0.769878	-1.80006	SEPT8	23176
201650_at	-0.637125	-0.401045	-3.43603	0.00316758	0.783657	-1.82813	KRT19, KRT15	3880, 3866, 102466658
243887_at	-0.315446	-0.200617	-3.43591	0.00316841	0.783657	-1.82838	MRPL30	51263
209652_s_at	0.543729	0.461335	3.43258	0.00319129	0.787677	-1.8352	PGF	5228
222483_at	-0.267924	-0.255998	-3.42834	0.00322072	0.789546	-1.84389	EFHD2	79180
210587_at	-0.690243	0.577628	-3.42819	0.00322173	0.789546	-1.84419	INHBE	83729
203967_at	-0.323656	-0.195428	-3.42528	0.00324211	0.790284	-1.85016	CDC6	990
225684_at	-0.319123	-0.239394	-3.41863	0.00328905	0.795754	-1.86377	SKA2	348235
219257_s_at	0.440152	0.500491	3.40435	0.00339207	0.811101	-1.89298	SPHK1	8877
222036_s_at	-0.344074	-0.260402	-3.40356	0.00339786	0.811101	-1.89459	MCM4	4173
209172_s_at	-0.535613	-0.322161	-3.40319	0.00340063	0.811101	-1.89536	CENPF	1063
225509_at	-0.361296	0.188639	-3.40024	0.00342238	0.81421	-1.9014	SAP30L	79685
227349_at	-0.318642	-0.405817	-3.40007	0.00342363	0.81421	-1.90174	, HELLS	3070
244027_at	0.249961	0.00104992	3.3988	0.003433	0.815336	-1.90433
204547_at	-0.352064	-0.21021	-3.39812	0.0034381	0.815336	-1.90573	RAB40B	10966
228147_at	-0.383639	-0.339305	-3.389	0.00350649	0.822972	-1.92438	SEPT7P2
207855_s_at	0.356852	-0.138865	3.38482	0.0035383	0.82745	-1.93292	CLCC1	23155
200952_s_at	-0.386255	-0.362723	-3.38321	0.00355062	0.828866	-1.93621	CCND2	894
225716_at	-0.414007	-0.294981	-3.38287	0.00355324	0.828866	-1.93691	BRI3BP	140707
232001_at	-0.306796	-0.193364	-3.3824	0.0035568	0.828866	-1.93785	PRKCQ-AS1
225265_at	-0.311142	-0.176484	-3.38223	0.0035581	0.828866	-1.9382	RBMS1, RBMS1P1	5937, 100616364
205530_at	0.300223	0.134457	3.38196	0.00356021	0.828866	-1.93876	ETFDH	2110
221478_at	-0.243332	0.0822838	-3.38044	0.00357188	0.83018	-1.94186	BNIP3L	665
239441_at	-0.413232	-0.298879	-3.37727	0.00359644	0.831641	-1.94834	ZNF780A	284323
244450_at	-0.243354	-0.273055	-3.37618	0.00360493	0.83233	-1.95057
209343_at	-0.359314	0.334481	-3.37338	0.00362676	0.83483	-1.95628	EFHD1	80303
225534_at	-0.277742	-0.223517	-3.37276	0.0036316	0.8351	-1.95755	SMIM19	114926
238910_at	-0.396754	-0.336032	-3.36861	0.00366431	0.840074	-1.96603	CLUHP3	100132341
220915_s_at	-0.365776	0.164977	-3.36679	0.00367874	0.842957	-1.96975
201649_at	-0.297079	0.0512374	-3.36564	0.00368792	0.844211	-1.9721	UBE2L6	9246
201136_at	-0.206954	-0.243917	-3.36318	0.00370756	0.848278	-1.97712	PLP2	5355
204457_s_at	-0.334653	0.239351	-3.35781	0.00375074	0.85429	-1.98807	GAS1	2619
202489_s_at	-0.419503	0.157902	-3.35543	0.00377006	0.855876	-1.99293	FXYD3	5349, 102466205
207076_s_at	-0.484827	0.357004	-3.35308	0.00378922	0.858756	-1.99773	ASS1	445
208763_s_at	-0.269226	0.24182	-3.35205	0.00379773	0.859398	-1.99985	TSC22D3	1831
219000_s_at	-0.319341	-0.180795	-3.35116	0.00380497	0.859746	-2.00165	DSCC1	79075
242574_at	0.245625	-0.0994359	3.35094	0.00380683	0.859746	-2.00211
214073_at	0.393015	0.255435	3.34422	0.00386244	0.868426	-2.01582	CTTN	2017
209773_s_at	-0.271316	-0.239187	-3.34129	0.0038869	0.871184	-2.02179	RRM2	6241
244025_at	0.448929	0.299065	3.33976	0.00389979	0.873369	-2.02492	ITPRIP	85450
212888_at	-0.304349	-0.184569	-3.33761	0.00391785	0.876119	-2.02928	DICER1	23405
200645_at	-0.222188	0.0896467	-3.33155	0.00396943	0.882948	-2.04164	, GABARAP	11337
200754_x_at	-0.381318	-0.342209	-3.32708	0.00400789	0.889062	-2.05075	SRSF2	6427, 693221
225747_at	0.304081	0.211406	3.32625	0.00401507	0.889984	-2.05244	COQ10A	93058
230446_at	-0.467766	0.39822	-3.32524	0.00402385	0.891497	-2.05451
204246_s_at	-0.226153	-0.20435	-3.32386	0.00403584	0.892413	-2.05732	DCTN3	11258
226141_at	0.274712	0.154732	3.31937	0.00407507	0.89583	-2.06646	CCDC149	91050
213186_at	-0.497169	-0.39717	-3.30402	0.00421223	0.914524	-2.09772	DZIP3	9666
206102_at	-0.236016	-0.27211	-3.30288	0.00422258	0.915896	-2.10004	GINS1	9837
244777_at	-0.428403	-0.334061	-3.29337	0.00431006	0.925189	-2.1194	DCP2	167227
226813_at	-0.244595	-0.00317949	-3.29216	0.0043213	0.925831	-2.12186	NTPCR	84284
205014_at	-0.22416	0.042047	-3.28816	0.0043587	0.931649	-2.12999	FGFBP1	9982
210239_at	-0.328438	-0.27458	-3.285	0.00438847	0.93569	-2.13642	IRX5	10265
222454_s_at	-0.228021	-0.205418	-3.28448	0.00439337	0.93569	-2.13747	PARVA	55742
213233_s_at	-0.273161	-0.179724	-3.28196	0.00441727	0.938873	-2.14259	KLHL9	55958
203124_s_at	-0.261229	0.222671	-3.27379	0.00449573	0.948899	-2.1592	SLC11A2	4891
204218_at	-0.340054	-0.194057	-3.2694	0.0045384	0.953605	-2.16812	ANAPC15	25906
236699_at	-0.537577	0.137857	-3.26836	0.00454855	0.95385	-2.17022
216685_s_at	-0.257377	-0.255916	-3.26729	0.00455904	0.954921	-2.1724	MTAP	4507
231810_at	-0.34246	-0.303209	-3.26684	0.00456344	0.954921	-2.17331	BRI3BP	140707
209529_at	0.268707	0.569826	3.2665	0.00456679	0.954921	-2.174	PLPP2	8612
208596_s_at	0.579602	0.644566	3.26639	0.00456787	0.954921	-2.17422	UGT1A9, UGT1A4, UGT1A10, UGT1A3, UGT1A6, UGT1A8, UGT1A7, UGT1A1, UGT1A5	54600, 54657, 54575, 54659, 54578, 54576, 54577, 54658, 54579
212335_at	0.253829	0.188101	3.26213	0.00460998	0.959156	-2.18288	GNS	2799
1558540_s_at	0.268485	0.267545	3.26193	0.00461197	0.959156	-2.18328	SLC2A11	66035
218350_s_at	-0.209688	-0.230124	-3.26111	0.00462011	0.960005	-2.18495	GMNN	51053
225582_at	0.477175	0.508335	3.25916	0.00463962	0.962738	-2.18892	ITPRIP	85450
209263_x_at	-0.275292	-0.0986884	-3.25178	0.00471381	0.972565	-2.20388	TSPAN4	7106
229773_at	-0.270006	-0.129539	-3.24922	0.00473985	0.975526	-2.20907	SNAP23	8773
228155_at	-0.600489	0.298581	-3.24576	0.0047753	0.978814	-2.2161	FAM213A	84293
235783_at	0.209228	-0.197471	3.2412	0.00482239	0.98273	-2.22535	MRTO4	51154
232652_x_at	0.222873	0.135726	3.23435	0.00489397	0.99066	-2.23924	SCAND1	51282
203964_at	-0.281919	-0.136524	-3.23376	0.00490017	0.991474	-2.24043	NMI	9111
201458_s_at	-0.299662	-0.149548	-3.23345	0.00490342	0.991691	-2.24106	BUB3	9184
236028_at	0.548619	0.359644	3.23207	0.00491801	0.992583	-2.24385	IBSP	3381
232113_at	0.419312	0.353387	3.22973	0.00494289	0.993929	-2.24861
239252_at	-0.39217	-0.297066	-3.2278	0.00496341	0.995456	-2.25251	COX7B	1349
241413_at	0.294909	-0.00186315	3.22584	0.00498439	0.997423	-2.25649
204679_at	0.207507	0.179967	3.22095	0.00503705	1	-2.26639	KCNK1	3775
219517_at	0.273516	0.351297	3.21958	0.00505196	1	-2.26917	ELL3,	80237
224574_at	-0.284447	-0.235732	-3.21618	0.00508903	1	-2.27606	C17orf49, RNASEK-C17orf49	124944
226269_at	-0.3422	-0.245683	-3.21106	0.00514524	1	-2.2864	GDAP1	54332
218128_at	-0.326377	-0.180766	-3.21098	0.00514621	1	-2.28658	NFYB	4801
232024_at	-0.730833	0.423891	-3.2068	0.00519261	1	-2.29504	GIMAP2	26157
200921_s_at	0.390664	0.294572	3.203	0.00523519	1	-2.30273	BTG1	694
202195_s_at	0.27821	0.19312	3.1995	0.00527471	1	-2.30981	TMED5	50999
213338_at	0.440264	0.382445	3.19672	0.00530633	1	-2.31543	TMEM158	25907
229292_at	0.285227	0.0494306	3.19582	0.00531658	1	-2.31725	EPB41L5	57669
243405_at	-0.360325	-0.274735	-3.1948	0.00532816	1	-2.3193	BLOC1S5	63915
228326_at	0.333613	0.186664	3.1921	0.0053592	1	-2.32476	WDR27	253769
225855_at	0.359735	-0.102509	3.18529	0.00543817	1	-2.33853	EPB41L5	57669
238439_at	0.417455	0.628934	3.17478	0.0055622	1	-2.35975	ANKRD22	118932
227017_at	-0.3396	-0.201494	-3.17192	0.00559654	1	-2.36554	ERICH1	157697
202831_at	0.444355	0.823042	3.16871	0.00563521	1	-2.37202	GPX2	2877
204146_at	-0.326725	-0.237721	-3.16813	0.00564219	1	-2.37318	RAD51AP1	10635
202549_at	-0.298924	-0.324987	-3.16472	0.00568362	1	-2.38006	VAPB	9217
1568849_at	0.624182	0.55379	3.16441	0.00568738	1	-2.38068	LINC00165
228760_at	-0.312022	-0.387629	-3.16106	0.00572846	1	-2.38745	SRSF8	10929
227614_at	0.518478	0.867486	3.15777	0.005769	1	-2.39408	HKDC1	80201
201756_at	0.236976	-0.0952998	3.15646	0.00578528	1	-2.39673	RPA2	6118
233528_s_at	-0.530487	0.226083	-3.1564	0.005786	1	-2.39685	GATSL3,	652968
229980_s_at	-0.213228	-0.208807	-3.15553	0.00579672	1	-2.39859	, SNX5	27131
236704_at	0.260542	-0.00206644	3.15455	0.0058089	1	-2.40056
231487_at	0.50661	0.346157	3.15242	0.00583557	1	-2.40487	COX8C	341947
236777_at	0.328223	0.208828	3.14835	0.00588666	1	-2.41306
1554411_at	-0.444245	-0.258014	-3.14695	0.00590444	1	-2.4159	CTNNB1	1499
226899_at	-0.565618	0.238608	-3.14607	0.00591555	1	-2.41766	UNC5B	219699
220012_at	0.322404	0.196494	3.1414	0.00597502	1	-2.42706	ERO1B	56605
1555920_at	-0.37567	-0.355907	-3.14084	0.00598224	1	-2.4282	CBX3	11335
207231_at	-0.491104	-0.500604	-3.14012	0.00599143	1	-2.42964	DZIP3	9666
231269_at	-0.29625	-0.235138	-3.13806	0.00601805	1	-2.43381	ASCC3	10973
228080_at	0.396816	0.335958	3.13787	0.00602041	1	-2.43417	LAYN	143903
232800_at	-0.359923	-0.135949	-3.1375	0.0060252	1	-2.43492
209527_at	-0.235875	-0.257626	-3.13721	0.00602892	1	-2.4355	EXOSC2	23404
236506_at	-0.301308	-0.117961	-3.1365	0.00603813	1	-2.43694
213982_s_at	-0.362401	-0.236503	-3.12849	0.00614268	1	-2.45306	RABGAP1L	9910
201804_x_at	-0.201128	-0.13334	-3.12179	0.0062314	1	-2.46653	TBCB	1155
1569905_at	0.297916	0.145657	3.11929	0.00626491	1	-2.47157	HSD11B1L	374875
218622_at	0.232783	-0.16416	3.11541	0.00631722	1	-2.47937	NUP37	79023
212897_at	0.257335	0.149448	3.11436	0.0063314	1	-2.48148	CDK19	23097
211784_s_at	-0.255759	-0.258646	-3.11264	0.00635477	1	-2.48494	SRSF1	6426
33494_at	0.240432	0.0679559	3.10965	0.00639552	1	-2.49094	ETFDH	2110
205462_s_at	0.456634	0.432472	3.10958	0.00639655	1	-2.49109	HPCAL1	3241
204880_at	-0.367476	-0.243997	-3.10744	0.00642581	1	-2.49537	MGMT	4255
1554841_at	0.338063	-0.16681	3.1051	0.0064581	1	-2.50008	MTHFD2L	441024
206561_s_at	0.419566	0.250363	3.10336	0.00648216	1	-2.50357	AKR1B10	57016
235324_at	-0.690244	-0.495126	-3.10157	0.00650706	1	-2.50717	SRSF3	6428
208978_at	-0.287656	0.121453	-3.10105	0.0065143	1	-2.50821	CRIP2	1397
221887_s_at	0.309731	0.249015	3.09618	0.00658263	1	-2.518	WHRN	25861
218481_at	-0.246014	-0.1603	-3.09376	0.00661677	1	-2.52286	EXOSC5	56915
233827_s_at	-0.429043	-0.366585	-3.09367	0.00661807	1	-2.52304	SUPT16H	11198
226452_at	-0.358569	-0.396759	-3.08559	0.00673335	1	-2.53924	PDK1	5163
230588_s_at	0.245631	0.117535	3.08364	0.00676148	1	-2.54315
236313_at	0.357803	0.433973	3.07535	0.00688233	1	-2.55976	CDKN2B	1030
202732_at	-0.254772	-0.0927703	-3.07503	0.00688708	1	-2.56041	PKIG	11142
224492_s_at	0.29683	-0.123975	3.0749	0.00688894	1	-2.56066	ZNF627	199692
227291_s_at	-0.301041	-0.243626	-3.07452	0.00689456	1	-2.56143	BOLA3	388962
209531_at	-0.236465	-0.209022	-3.07226	0.00692801	1	-2.56597	GSTZ1	2954
225527_at	-0.269201	0.067785	-3.07185	0.00693402	1	-2.56678	CEBPG	1054
202899_s_at	-0.326904	-0.382003	-3.07057	0.00695305	1	-2.56935	SRSF3	6428
1554696_s_at	-0.32024	-0.241551	-3.07035	0.00695634	1	-2.56979	TYMS	7298
225857_s_at	-0.206989	-0.162388	-3.06878	0.00697961	1	-2.57292	, SNHG17
209504_s_at	0.306877	0.186038	3.06792	0.00699257	1	-2.57466	PLEKHB1	58473
1557812_a_at	0.390058	-0.140037	3.06499	0.0070364	1	-2.58052
218069_at	-0.202552	-0.21645	-3.06249	0.00707409	1	-2.58553	DCTPP1	79077
207117_at	-0.502194	0.206159	-3.06034	0.00710664	1	-2.58983	ZNF117	51351
221577_x_at	-0.66	0.545545	-3.06019	0.00710893	1	-2.59013	GDF15	9518
1554415_at	-0.275145	-0.221353	-3.05954	0.00711879	1	-2.59143	TAF5L	27097
230710_at	-0.36773	0.0781527	-3.0593	0.00712243	1	-2.59191	MIR210, MIR210HG	406992
214882_s_at	-0.337445	-0.363509	-3.0585	0.00713465	1	-2.59351	SRSF2	6427, 693221
218710_at	-0.209811	-0.179437	-3.0544	0.00719732	1	-2.60171	TTC27	55622
201755_at	-0.453597	-0.334743	-3.04515	0.00734083	1	-2.6202	MCM5	4174
37950_at	-0.271501	-0.178765	-3.04358	0.00736549	1	-2.62334	PREP	5550
220265_at	0.39254	0.354414	3.04033	0.0074168	1	-2.62984
209505_at	0.429605	0.292671	3.03838	0.00744767	1	-2.63373	NR2F1	7025
1555977_at	0.335309	-0.127741	3.03695	0.00747047	1	-2.6366	MYL12A	10627
243840_at	-0.263028	-0.278921	-3.03494	0.00750256	1	-2.64061
1557129_a_at	-0.736782	-0.404893	-3.03389	0.00751929	1	-2.6427	FAM111B	374393
206137_at	-0.234496	-0.0407296	-3.02555	0.00765423	1	-2.65934	RIMS2	9699
213057_at	-0.231307	-0.20399	-3.02432	0.00767427	1	-2.66179	ATPAF2	91647
39402_at	-0.898267	0.382759	-3.02431	0.00767457	1	-2.66183	IL1B	3553
230134_s_at	-0.256164	-0.310831	-3.0228	0.00769916	1	-2.66482	RC3H2	54542
1554237_at	-0.377993	-0.28178	-3.02104	0.00772811	1	-2.66833
202179_at	-0.232895	-0.160985	-3.02074	0.0077332	1	-2.66895	BLMH	642
229981_at	-0.33415	-0.46517	-3.01843	0.00777132	1	-2.67355	SNX5	27131
230363_s_at	-0.34485	-0.305741	-3.01535	0.00782242	1	-2.67968	INPP5F	22876
206095_s_at	-0.251949	-0.197312	-3.01505	0.00782742	1	-2.68028	SRSF10	10772
236924_at	0.353541	-0.113394	3.01304	0.0078611	1	-2.6843
202083_s_at	0.457737	0.270096	3.00993	0.00791328	1	-2.69049	SEC14L1	6397
214434_at	0.471154	0.23685	3.00815	0.00794332	1	-2.69403	HSPA12A	259217
232810_at	-0.446726	-0.351407	-3.00643	0.00797243	1	-2.69745	AIG1	51390
225269_s_at	-0.251665	-0.161563	-3.00453	0.0080048	1	-2.70124	RBMS1	5937, 100616364
1554085_at	-0.400667	-0.281896	-3.00374	0.00801826	1	-2.70281	DDX51	317781
226041_at	-0.294875	-0.153444	-2.99947	0.00809158	1	-2.71132	NAPEPLD	222236
241781_at	0.412825	-0.216917	2.99818	0.00811384	1	-2.71389	CARNMT1	138199
211712_s_at	-0.615727	0.108786	-2.99487	0.00817122	1	-2.72048	ANXA9	8416
229106_at	-0.222563	-0.185918	-2.99404	0.00818565	1	-2.72213	DYNLL2	140735
218489_s_at	-0.287487	-0.257147	-2.98357	0.00837001	1	-2.74295	ALAD	210
209481_at	0.226794	-0.0545877	2.97754	0.00847797	1	-2.75492	SNRK	54861
210336_x_at	0.277835	0.171777	2.97078	0.00860069	1	-2.76835	MZF1	7593
204299_at	-0.325966	-0.365962	-2.96299	0.00874432	1	-2.78381	SRSF10	10772
238183_at	0.241069	0.0164947	2.96237	0.00875582	1	-2.78504	PRKAR1B	5575
212119_at	-0.235992	0.101488	-2.96061	0.00878859	1	-2.78853	RHOQ	23433
224185_at	0.331512	-0.152489	2.96019	0.00879639	1	-2.78936
222037_at	-0.309772	-0.230186	-2.95824	0.00883297	1	-2.79323	MCM4	4173
218167_at	-0.230651	-0.152357	-2.95623	0.00887084	1	-2.79722	AMZ2	51321
214710_s_at	0.294595	-0.106548	2.9536	0.00892049	1	-2.80243	CCNB1	891
220673_s_at	0.403997	0.165113	2.94748	0.00903708	1	-2.81455	PPP4R4	57718
230527_at	0.403482	0.529832	2.94263	0.00913058	1	-2.82416
241342_at	-0.214909	0.0227795	-2.94262	0.00913086	1	-2.82418	TMEM65	157378
229022_at	-0.352639	-0.174983	-2.94164	0.0091497	1	-2.82611	ZFX	7543
232650_at	0.293268	-0.0748468	2.9407	0.00916796	1	-2.82797	C12orf65	91574
212030_at	-0.268334	-0.170936	-2.93694	0.00924144	1	-2.83541	RBM25	58517
235964_x_at	-0.19008	0.00520171	-2.93569	0.00926602	1	-2.83789	SAMHD1	25939
204695_at	-0.365268	-0.231536	-2.93169	0.00934502	1	-2.84581	CDC25A	993
217775_s_at	0.259145	0.220461	2.92888	0.00940089	1	-2.85137	RDH11	51109
217809_at	-0.266397	-0.241171	-2.92552	0.00946792	1	-2.85799	BZW2	28969
228846_at	0.454117	0.26776	2.92427	0.00949312	1	-2.86047	MXD1	4084
204603_at	-0.262102	-0.243766	-2.92101	0.00955893	1	-2.86691	EXO1	9156
208493_at	0.229554	-0.113823	2.92062	0.00956676	1	-2.86767	HOXA11	3207
225295_at	-0.282763	-0.319508	-2.91939	0.00959182	1	-2.87011	SLC39A10	57181
1556704_s_at	0.320415	0.0255403	2.91737	0.00963301	1	-2.8741		100133920, 101929583
232478_at	-0.546923	-0.373057	-2.91168	0.00974977	1	-2.88533
205036_at	-0.209132	-0.170984	-2.90891	0.00980714	1	-2.8908	LSM6	11157
212141_at	-0.334578	-0.215911	-2.90589	0.00987007	1	-2.89675	MCM4	4173
211795_s_at	-0.643368	0.377226	-2.90357	0.00991866	1	-2.90133	FYB	2533
214960_at	0.276696	-0.199496	2.90317	0.0099271	1	-2.90212	API5	8539
228328_at	0.312536	0.20104	2.90197	0.00995224	1	-2.90448	KLHL28	54813

## Sheet: WS_CM
AffyIDs	logFC	AveExpr	t	P.Value	adj.P.Val	B	Gene_Symbol	EntrezID
209699_x_at	1.22837	1.20583	15.0224	3.21796e-11	1.46368e-05	12.0273	AKR1C1, AKR1C2	1645, 1646
216594_x_at	1.142	1.18848	12.5934	5.04712e-10	0.000114784	10.5156	AKR1C1, AKR1C2	1645, 1646
204151_x_at	1.17434	1.24753	11.6792	1.59546e-09	0.000241898	9.8156	AKR1C1, AKR1C2	1645, 1646
211653_x_at	1.21654	1.22326	10.7597	5.46897e-09	0.000621888	9.02346	AKR1C1, AKR1C2	1645, 1646
223468_s_at	-0.770811	0.00778483	-7.86876	4.69732e-07	0.0423888	5.82144	RGMA	56963
241418_at	0.740446	0.202379	7.76744	5.5916e-07	0.0423888	5.68641
203710_at	0.560469	0.36571	7.41077	1.04386e-06	0.0659208	5.19746	ITPR1	3708
207528_s_at	0.864667	0.444444	7.3517	1.15943e-06	0.0659208	5.11442	SLC7A11	23657
1555854_at	1.44078	1.41605	7.02096	2.1057e-06	0.106419	4.63834	AKR1C1, AKR1C2	1645, 1646
1567253_at	-0.49914	-0.0301164	-6.22849	9.34553e-06	0.354107	3.4205	OR10D3
210752_s_at	0.36976	0.0497805	5.96225	1.57156e-05	0.476547	2.98696	MLX	6945
202831_at	0.820348	0.823042	5.84992	1.96243e-05	0.494732	2.80042	GPX2	2877
1554631_at	-0.513992	0.0780712	-5.76022	2.3461e-05	0.494732	2.64994	ATM	472
217678_at	0.720079	0.33664	5.65907	2.87296e-05	0.522704	2.47866	SLC7A11	23657
207743_at	-0.413345	-0.00981128	-5.49664	3.98839e-05	0.623158	2.20014
209921_at	0.637737	0.358335	5.48869	4.05329e-05	0.623158	2.1864	SLC7A11	23657
203665_at	1.20207	0.716205	5.43549	4.51646e-05	0.66268	2.0942	HMOX1	3162
1562102_at	1.41165	1.18412	5.32056	5.71254e-05	0.726492	1.8935
215170_s_at	0.366001	-0.105164	5.30618	5.88364e-05	0.726492	1.86824	CEP152	22995
1563320_at	-0.488838	-0.0922236	-5.2576	6.50157e-05	0.75951	1.78269
207746_at	-0.633987	-0.395415	-5.00042	0.000110803	0.971504	1.32406
1553449_at	0.817052	0.496054	4.95367	0.000122173	0.974916	1.23969
201750_s_at	0.339959	0.0567189	4.91445	0.000132631	0.988589	1.16868	ECE1	1889
201236_s_at	-0.470211	0.149084	-4.90688	0.000134754	0.988589	1.15494	BTG2	7832
214976_at	0.426594	0.0395528	4.8964	0.00013775	0.991591	1.13592	RPL13	6137
230013_s_at	0.421406	-0.0237972	4.79409	0.000170816	1	0.949511	ARHGAP23	57636
1563997_at	-0.427926	0.0715948	-4.76289	0.000182436	1	0.892403	CEP41	95681
244292_at	-0.50615	-0.19661	-4.74437	0.000189712	1	0.858451
203631_s_at	-0.406686	0.0780225	-4.6797	0.000217533	1	0.739544	GPRC5B	51704
210824_at	-0.418526	0.138315	-4.67087	0.00022164	1	0.723277
220682_s_at	0.492285	0.0772791	4.63984	0.000236715	1	0.666031
212665_at	0.415897	0.265805	4.61225	0.000250996	1	0.615038	TIPARP	25976
205873_at	0.380202	-0.0385234	4.59165	0.000262231	1	0.576905	PIGL	9487
232140_at	0.38534	0.246034	4.55504	0.000283479	1	0.509013
217626_at	0.643796	0.571367	4.54178	0.000291597	1	0.484397	AKR1C1	1645
232540_x_at	0.371048	-0.0520285	4.49139	0.000324674	1	0.39067
224480_s_at	0.677197	0.321481	4.46942	0.000340273	1	0.349711	GPAT3	84803
1556432_at	-0.53687	-0.377905	-4.40494	0.000390578	1	0.229273
203925_at	0.50536	0.122336	4.40271	0.000392449	1	0.225097	GCLM	2730
202436_s_at	0.361228	0.126536	4.39173	0.000401779	1	0.204561	CYP1B1	1545
227557_at	-0.369249	-0.0799897	-4.37806	0.000413723	1	0.17895	SCARF2	91179
226034_at	0.841513	0.706181	4.37716	0.000414524	1	0.177257	DUSP4	1846
209160_at	0.928912	0.765987	4.29999	0.000489148	1	0.0324376	AKR1C3	8644
229773_at	-0.355553	-0.129539	-4.27869	0.000512056	1	-0.00763367	SNAP23	8773
215125_s_at	0.714176	0.734957	4.27314	0.000518196	1	-0.0180717	UGT1A9, UGT1A4, UGT1A10, UGT1A3, UGT1A6, UGT1A8, UGT1A7, UGT1A1, UGT1A5	54600, 54657, 54575, 54659, 54578, 54576, 54577, 54658, 54579
235029_at	-0.31984	-0.258366	-4.25734	0.000536109	1	-0.0478343	GINS4	84296
1570171_at	-0.425876	-0.0122541	-4.24473	0.000550849	1	-0.0715928
235701_at	-0.455409	-0.278615	-4.20382	0.000601546	1	-0.148743
229011_at	0.429265	0.345083	4.20221	0.00060363	1	-0.151774	EMP1	2012
227349_at	-0.388461	-0.405817	-4.14507	0.000682722	1	-0.259735	, HELLS	3070
204133_at	0.344976	-0.0859802	4.13844	0.000692559	1	-0.272283	RRP9	9136
1569154_a_at	-0.301766	0.0958426	-4.09243	0.000764838	1	-0.359384
229671_s_at	0.399329	-0.176407	4.08347	0.00077978	1	-0.376365
204015_s_at	0.603948	0.520485	4.05982	0.000820637	1	-0.421194	DUSP4	1846
1554293_at	0.56872	-0.263804	4.02528	0.000884243	1	-0.486741	TTBK2	146057
1554074_s_at	-0.336958	0.0968534	-3.97194	0.000992329	1	-0.588041	SLFNL1	200172
228702_at	0.385819	0.521697	3.96338	0.00101088	1	-0.604315	LINC-PINT	378805
232889_at	-0.437296	-0.317033	-3.94871	0.0010435	1	-0.632216
203589_s_at	0.313271	-0.0362802	3.94673	0.00104797	1	-0.63598	TFDP2	7029
1554822_at	-0.408296	-0.281212	-3.93847	0.00106686	1	-0.651678	PHTF2	57157
234085_at	-0.351223	-0.234817	-3.92881	0.00108941	1	-0.670054	CCDC169	728591
235705_at	-0.443629	-0.261033	-3.92377	0.00110135	1	-0.679638
231897_at	0.287363	0.271408	3.92114	0.00110764	1	-0.684643	, PTGR1	22949
215919_s_at	0.322104	-0.140771	3.89145	0.00118118	1	-0.741144	MRPS11	64963
211213_at	0.306823	-0.0691682	3.8833	0.00120221	1	-0.756662	ORC5	5001
239164_at	-0.468224	-0.369288	-3.88045	0.00120966	1	-0.762091
1553167_a_at	0.439435	-0.157632	3.86868	0.00124089	1	-0.784498	SEPSECS	51091
226834_at	0.289762	0.164981	3.85186	0.00128694	1	-0.816538	CLMP	79827
213895_at	-0.346111	0.194608	-3.84235	0.00131373	1	-0.834652	EMP1	2012
224835_at	0.412577	-0.0261589	3.82131	0.001375	1	-0.874735	GPCPD1	56261
244661_at	0.289068	0.292122	3.79755	0.00144763	1	-0.920006	SOAT1	6646
244252_at	-0.339383	0.115014	-3.77492	0.00152039	1	-0.963136
221317_x_at	-0.362312	0.0792061	-3.74469	0.00162333	1	-1.02076	PCDHB6	56130
221826_at	0.31973	-0.0797651	3.74273	0.00163024	1	-1.02449	ANGEL2	90806
227103_s_at	0.309092	0.227997	3.74144	0.0016348	1	-1.02695	ECE2	9718
202862_at	0.3118	-0.109586	3.74138	0.00163501	1	-1.02706	FAH	2184
1565975_at	-0.353162	-0.427432	-3.66351	0.00193559	1	-1.17552
209875_s_at	1.23762	1.10017	3.65494	0.00197189	1	-1.19186	SPP1	6696
214197_s_at	0.352319	0.303019	3.64805	0.00200153	1	-1.20499	SETDB1	9869
1554099_a_at	0.269283	0.108469	3.63073	0.0020781	1	-1.23801	SPIN3	169981
240263_at	-0.416624	-0.387658	-3.61375	0.002156	1	-1.27039
222812_s_at	0.319736	0.298575	3.58277	0.00230568	1	-1.32943	RHOF	54509
208353_x_at	-0.234138	0.135812	-3.57961	0.00232149	1	-1.33544	ANK1	286
228824_s_at	0.288619	0.275921	3.57294	0.0023553	1	-1.34816	, PTGR1	22949
1569566_at	0.478201	0.3273	3.56779	0.00238169	1	-1.35796	TBC1D1	23216
207087_x_at	-0.280251	0.119339	-3.56684	0.0023866	1	-1.35977	ANK1	286
236721_at	0.317034	0.225747	3.56519	0.00239514	1	-1.36291	ALKBH1	8846
206094_x_at	0.575463	0.524628	3.55761	0.0024348	1	-1.37736	UGT1A9, UGT1A4, UGT1A10, UGT1A3, UGT1A6, UGT1A8, UGT1A7, UGT1A1, UGT1A5	54600, 54657, 54575, 54659, 54578, 54576, 54577, 54658, 54579
215724_at	0.302406	-0.126764	3.54647	0.00249424	1	-1.39857	PLD1	5337
218416_s_at	0.4101	0.17512	3.53837	0.00253837	1	-1.414	SLC48A1	55652
212314_at	0.320038	0.484362	3.53588	0.0025521	1	-1.41874	SEL1L3	23231
205390_s_at	-0.34485	-0.246314	-3.53577	0.00255272	1	-1.41895	ANK1	286
237510_at	0.365758	0.303139	3.52371	0.00262027	1	-1.44193
215109_at	-0.242393	-0.168064	-3.51813	0.00265209	1	-1.45254
218509_at	0.350111	0.10875	3.5179	0.00265341	1	-1.45298	PLPPR2	64748
221232_s_at	-0.340373	-0.140987	-3.5005	0.00275526	1	-1.48611	ANKRD2	26287
204345_at	0.347937	0.190122	3.48371	0.00285723	1	-1.51806	COL16A1	1307
212541_at	0.273543	-0.0825937	3.47669	0.00290092	1	-1.5314	FLAD1	80308
220141_at	0.369019	0.309212	3.46775	0.00295759	1	-1.54841	C11orf63	79864
203988_s_at	0.259446	0.187039	3.46638	0.00296634	1	-1.55101	FUT8	2530
228216_at	0.351245	-0.180572	3.46131	0.00299907	1	-1.56066	ZBTB37	84614
208161_s_at	0.77053	0.56051	3.43573	0.00316963	1	-1.60929	ABCC3	8714
238638_at	0.27241	0.163916	3.42962	0.00321183	1	-1.62091	SLC37A2	219855
235456_at	0.345861	0.428264	3.42816	0.00322197	1	-1.62369
225919_s_at	0.305357	0.0276425	3.41905	0.00328606	1	-1.641	C9orf72	203228
238183_at	0.277971	0.0164947	3.41584	0.0033089	1	-1.64709	PRKAR1B	5575
222705_s_at	0.290939	-0.264731	3.40845	0.00336221	1	-1.66113	SLC25A15	10166
236347_at	0.413512	-0.116419	3.37302	0.00362962	1	-1.72839	MMAA	166785
1566256_s_at	-0.301656	-0.250327	-3.37034	0.00365064	1	-1.73346
227004_at	0.324542	0.105882	3.36649	0.0036811	1	-1.74076	CDKL5	6792
221298_s_at	-0.294192	0.180086	-3.36048	0.00372919	1	-1.75216	SLC22A8	9376
1565817_at	-0.342948	-0.0744257	-3.35629	0.0037631	1	-1.76012
1555914_a_at	-0.277013	-0.0799697	-3.33825	0.00391251	1	-1.79432	EXD3	54932
226141_at	0.276209	0.154732	3.33746	0.00391912	1	-1.7958	CCDC149	91050
1562062_at	-0.235502	-0.110191	-3.33319	0.00395546	1	-1.80391
243869_at	0.284516	-0.0283575	3.33058	0.00397779	1	-1.80885	CCDC88C	440193
239627_at	0.279695	0.127592	3.32959	0.00398629	1	-1.81073
204210_s_at	0.468858	-0.105385	3.29804	0.00426684	1	-1.87045	PCYT1A	5130
206857_s_at	0.297647	0.256108	3.28539	0.00438473	1	-1.89438	FKBP1B, MFSD2B	2281, 388931
242037_at	0.343636	0.50608	3.27082	0.00452459	1	-1.92194	ASPH	444
239788_at	-0.280844	-0.285245	-3.26606	0.00457118	1	-1.93093
204014_at	0.629522	0.577566	3.26079	0.00462334	1	-1.94089	DUSP4	1846
227899_at	-0.299544	0.130406	-3.25151	0.00471664	1	-1.95842	VIT	5212
219594_at	0.41518	0.395467	3.24338	0.00479984	1	-1.97377	NINJ2	4815
209922_at	0.236733	-0.0604671	3.2334	0.00490394	1	-1.99259	BRAP	8315
231175_at	0.439427	0.264016	3.21873	0.00506118	1	-2.02028	BEND6	221336
1554557_at	0.251712	-0.00853854	3.21571	0.00509407	1	-2.02596	ATP11B	23200
209653_at	0.22572	-0.112504	3.2066	0.00519481	1	-2.04313	, KPNA4	3840
209641_s_at	0.411088	0.460237	3.20557	0.00520632	1	-2.04507	ABCC3	8714
219470_x_at	0.254881	-0.0484215	3.19521	0.00532349	1	-2.06459	CCNJ	54619
204807_at	0.287942	-0.241288	3.18945	0.00538983	1	-2.07545	TMEM5	10329
230527_at	0.436412	0.529832	3.18279	0.00546741	1	-2.08797
225747_at	0.29064	0.211406	3.17923	0.00550937	1	-2.09468	COQ10A	93058
243501_at	0.298037	-0.285742	3.13063	0.00611452	1	-2.18599	ATP5F1	515
220265_at	0.403863	0.354414	3.12803	0.00614878	1	-2.19089
222483_at	-0.243342	-0.255998	-3.1138	0.00633901	1	-2.21757	EFHD2	79180
230713_at	-0.287885	-0.2844	-3.10426	0.00646971	1	-2.23544
211363_s_at	0.221144	-0.235584	3.10424	0.00647007	1	-2.23549	, MTAP	4507
228366_at	0.276125	0.256093	3.08999	0.00667025	1	-2.26216
227517_s_at	0.244708	-0.296515	3.08696	0.00671362	1	-2.26783	GAS5	60674
223482_at	0.21349	0.22826	3.08444	0.00674991	1	-2.27255	TMEM120A	83862
237030_at	-0.321736	0.140683	-3.08436	0.00675102	1	-2.27269	ACPP	55
229842_at	-0.435763	-0.335484	-3.08097	0.00680018	1	-2.27904	ELF3	1999
228092_at	0.314618	-0.224958	3.07853	0.00683578	1	-2.28361	CREM	1390
227217_at	-0.238112	0.0944784	-3.06748	0.00699908	1	-2.30427	WNK2	65268
223152_at	0.297528	0.191383	3.0454	0.00733687	1	-2.34549	PPP1R12C	54776
242088_at	0.34136	0.459257	3.0446	0.00734955	1	-2.347	KLHL24	54800
1555292_at	0.240378	0.0337939	3.04377	0.00736244	1	-2.34853	STRIP2	57464
226939_at	0.501025	0.475175	3.04367	0.00736407	1	-2.34872	CPEB2	132864
1556195_a_at	0.263289	-0.186876	3.02597	0.00764743	1	-2.38173
204104_at	0.227628	0.0927032	3.02465	0.00766889	1	-2.38418	SNAPC2	6618
204541_at	0.249912	0.33045	3.02165	0.00771817	1	-2.38978	SEC14L2	23541
207714_s_at	0.250191	-0.13566	3.00923	0.00792517	1	-2.41291	SERPINH1	871
210609_s_at	0.317886	0.267716	3.00507	0.00799562	1	-2.42064	TP53I3	9540
232899_at	0.22715	-0.214252	2.99432	0.0081807	1	-2.44063	CENPBD1P1, RPL23AP82, , FAM41C	65996, 284593
221951_at	0.238286	0.202794	2.97594	0.00850698	1	-2.47478	TMEM80	283232
201072_s_at	-0.246046	-0.218049	-2.97442	0.00853438	1	-2.47759	SMARCC1	6599
215071_s_at	0.331218	0.644829	2.97405	0.00854116	1	-2.47828	HIST1H2AC	8334
226368_at	0.274632	0.332531	2.97328	0.00855508	1	-2.4797	CHST11	50515
1564407_a_at	-0.239614	-0.169913	-2.9691	0.00863154	1	-2.48747
1555967_at	0.3397	0.245922	2.96797	0.0086522	1	-2.48955
225968_at	0.209933	0.191742	2.96726	0.00866525	1	-2.49087	PRICKLE2	166336
227747_at	0.225629	0.180999	2.96408	0.00872399	1	-2.49677	MPZL3	196264
1561965_at	0.251924	-0.0678846	2.96267	0.00875014	1	-2.49938
217432_s_at	0.268765	-0.0146595	2.95947	0.00880983	1	-2.50531	IDS,	3423
1569144_a_at	0.264726	0.160845	2.95502	0.00889358	1	-2.51357	CYSRT1	375791
235610_at	0.326131	-0.0811268	2.95314	0.00892905	1	-2.51704	ALKBH8	91801
209504_s_at	0.295128	0.186038	2.95046	0.00898009	1	-2.52201	PLEKHB1	58473
209505_at	0.414275	0.292671	2.92996	0.00937932	1	-2.55995	NR2F1	7025
1558732_at	-0.304022	-0.185992	-2.92572	0.00946406	1	-2.56779	MAP4K4	9448
1564539_at	-0.458754	0.132594	-2.92442	0.00948999	1	-2.57018		647323
232440_at	-0.299309	-0.229796	-2.9205	0.00956921	1	-2.57743	ZDHHC13	54503
236278_at	0.357539	0.342542	2.9204	0.00957119	1	-2.57761	HIST1H3E	8353
201425_at	0.304276	0.266844	2.91168	0.00974965	1	-2.59371	ALDH2	217
232716_at	0.286682	-0.146378	2.90584	0.00987098	1	-2.60449

## Sheet: STE14
AffyIDs	logFC	AveExpr	t	P.Value	adj.P.Val	B	Gene_Symbol	EntrezID
232440_at	-0.511489	-0.229796	-4.99084	0.000113041	1	0.984507	ZDHHC13	54503
1563997_at	0.438539	0.0715948	4.88101	0.00014227	1	0.808665	CEP41	95681
207765_s_at	0.442061	0.351886	4.83539	0.000156588	1	0.735076	FAM214B	80256
202549_at	-0.449089	-0.324987	-4.75451	0.000185694	1	0.603866	VAPB	9217
209738_x_at	0.452621	0.213014	4.66528	0.000224283	1	0.457998	PSG6	5675
203631_s_at	0.394192	0.0780225	4.53593	0.000295254	1	0.244602	GPRC5B	51704
220669_at	-0.361018	-0.234255	-4.31065	0.000478079	1	-0.132142	OTUD4	54726
1563629_a_at	-0.314788	0.156132	-4.15065	0.000674559	1	-0.40318
223830_s_at	-0.406274	0.271203	-4.13788	0.000693402	1	-0.424933	TRIM5	85363
206068_s_at	-0.446188	-0.302435	-3.97281	0.000990462	1	-0.707234	ACADL	33
232912_at	-0.455561	-0.281078	-3.96363	0.00101035	1	-0.723014
1556804_s_at	0.517993	0.136817	3.89674	0.00116773	1	-0.838047
1553322_s_at	-0.331361	-0.163886	-3.85203	0.00128647	1	-0.915108	TEAD1	7003
227868_at	-0.43533	0.233333	-3.83775	0.00132689	1	-0.939743		154761
1568868_at	-0.466587	0.14223	-3.81356	0.00139825	1	-0.981484	CYP27C1	339761
221778_at	-0.350347	0.251461	-3.80558	0.00142265	1	-0.99527	KDM7A	80853
1555623_at	0.251397	0.151088	3.79551	0.00145404	1	-1.01267
239272_at	0.583503	0.469212	3.79439	0.00145756	1	-1.0146	MMP28	79148
210752_s_at	-0.233225	0.0497805	-3.76067	0.00156808	1	-1.0729	MLX	6945
215843_s_at	-0.379136	0.131663	-3.73372	0.0016624	1	-1.11952	TLL2	7093
1570171_at	-0.374097	-0.0122541	-3.72865	0.00168076	1	-1.12829
244653_at	-0.351196	-0.254533	-3.72016	0.00171198	1	-1.14299	SETD7	80854
1554752_a_at	-0.37885	-0.272545	-3.69745	0.00179833	1	-1.1823
1554486_a_at	-0.389229	-0.347329	-3.60509	0.00219683	1	-1.34238	GFOD1	54438
242788_at	-0.333231	-0.140891	-3.55896	0.00242768	1	-1.42239	KDM4D	55693
230711_at	-0.331412	0.198789	-3.52873	0.00259193	1	-1.47485
237502_at	-0.354726	-0.399437	-3.51015	0.00269831	1	-1.50709
232058_at	0.381772	0.0548526	3.49593	0.00278261	1	-1.53176
200952_s_at	-0.397142	-0.362723	-3.47857	0.00288918	1	-1.5619	CCND2	894
202342_s_at	0.36067	0.16908	3.44889	0.00308073	1	-1.61339	TRIM2	23321
238802_at	0.43484	0.17634	3.43927	0.00314547	1	-1.63008	TYSND1	219743
1559658_at	-0.494579	-0.395064	-3.43089	0.00320298	1	-1.64462	KATNBL1	79768
210293_s_at	0.267817	-0.0389673	3.42482	0.00324529	1	-1.65515	SEC23B	10483
235421_at	0.307893	0.170281	3.4058	0.00338147	1	-1.68815
205122_at	0.307131	0.0554618	3.40383	0.00339595	1	-1.69157	TMEFF1, MSANTD3-TMEFF1	8577
207312_at	0.288158	0.217213	3.39661	0.00344927	1	-1.70408	PHKG1	5260
238858_at	0.346335	-0.0957172	3.39305	0.00347592	1	-1.71026	TIFA	92610
1553559_at	0.258838	0.224724	3.37701	0.00359843	1	-1.73807	TMEM171	134285
231327_at	-0.251895	-0.0777931	-3.34221	0.00387921	1	-1.79841
214874_at	-0.311727	-0.31157	-3.32663	0.00401181	1	-1.82541	PKP4	8502
221604_s_at	-0.22229	-0.105104	-3.29059	0.0043359	1	-1.88783	PEX16	9409
210867_at	0.292141	0.293033	3.28543	0.00438434	1	-1.89676	CNOT4	4850
213675_at	0.266046	-0.0680294	3.24714	0.0047612	1	-1.96303
229926_at	-0.490707	-0.32582	-3.24357	0.00479783	1	-1.96919	MIR3682	100500850
205146_x_at	-0.266028	0.0188737	-3.24299	0.00480387	1	-1.9702	APBA3	9546
239627_at	-0.271053	0.127592	-3.22671	0.0049751	1	-1.99835
236480_at	-0.461114	-0.00345365	-3.21627	0.00508796	1	-2.01638	MIR210HG
236721_at	-0.284597	0.225747	-3.20042	0.00526423	1	-2.04376	ALKBH1	8846
221241_s_at	-0.337573	0.132219	-3.19449	0.00533175	1	-2.054	BCL2L14	79370
1552711_a_at	-0.251558	-0.186424	-3.1769	0.005537	1	-2.08437	, CYB5D1	124637
1565817_at	-0.323479	-0.0744257	-3.16576	0.00567098	1	-2.10359
233780_at	-0.325314	-0.346598	-3.15537	0.00579876	1	-2.1215	RIF1	55183
226530_at	-0.24121	0.0722464	-3.13881	0.00600829	1	-2.15004	BMF	90427
241036_at	-0.26496	-0.285995	-3.10425	0.00646992	1	-2.20955	HPS3	84343
238831_at	-0.258467	-0.281812	-3.07326	0.00691313	1	-2.26281	TMEM33	55161
221576_at	-0.418004	0.233048	-3.0497	0.00726987	1	-2.30325
205847_at	-0.263438	0.155235	-3.04401	0.0073587	1	-2.31302	PRSS22	64063
238910_at	-0.358084	-0.336032	-3.04029	0.00741744	1	-2.31941	CLUHP3	100132341
239346_at	0.32214	-0.188628	3.01955	0.0077527	1	-2.35493	GTF2H3	2967
242091_at	-0.252019	-0.0727593	-3.01886	0.00776416	1	-2.35612	ZNF720	124411
228088_at	-0.230361	-0.159728	-3.00609	0.00797834	1	-2.37799	SESTD1	91404
201945_at	0.271162	0.167264	2.99248	0.0082129	1	-2.40127	FURIN	5045
202488_s_at	0.257213	0.231455	2.99181	0.00822457	1	-2.40241	FXYD3	5349, 102466205
244779_at	-0.274035	-0.248559	-2.98717	0.00830614	1	-2.41034	ZDHHC2	51201
240185_at	-0.337075	-0.146633	-2.98224	0.00839379	1	-2.41878
235289_at	-0.28855	-0.276149	-2.97922	0.00844785	1	-2.42393	EIF5A2	56648
1559674_at	0.256961	0.122492	2.97849	0.00846095	1	-2.42518	ZNF333	84449
232650_at	0.296497	-0.0748468	2.97309	0.00855867	1	-2.4344	C12orf65	91574
230703_at	-0.298963	-0.332657	-2.9387	0.00920703	1	-2.49306
212978_at	-0.213226	-0.248098	-2.92213	0.00953618	1	-2.52127	LRRC8B	23507
202666_s_at	0.239041	-0.0359783	2.92143	0.00955051	1	-2.52247	ACTL6A	86
221317_x_at	-0.281369	0.0792061	-2.9081	0.00982387	1	-2.54513	PCDHB6	56130

## Sheet: STE474
AffyIDs	logFC	AveExpr	t	P.Value	adj.P.Val	B	Gene_Symbol	EntrezID
209699_x_at	3.46531	1.20583	42.379	1.26264e-18	5.74311e-13	31.3183	AKR1C1, AKR1C2	1645, 1646
216594_x_at	3.44649	1.18848	38.006	7.83705e-18	1.78233e-12	29.9342	AKR1C1, AKR1C2	1645, 1646
239814_at	3.75689	0.551873	36.2965	1.69299e-17	2.40156e-12	29.3256
221698_s_at	4.99202	0.897746	35.8198	2.11196e-17	2.40156e-12	29.1484	CLEC7A	64581
216870_x_at	-3.05683	-0.685532	-34.5292	3.89973e-17	3.54757e-12	28.651	DLEU2, DLEU2L	406948
204151_x_at	3.43331	1.24753	34.1454	4.70022e-17	3.56315e-12	28.4979	AKR1C1, AKR1C2	1645, 1646
1555756_a_at	4.62359	0.799977	31.8542	1.49764e-16	9.73139e-12	27.5314	CLEC7A	64581
211653_x_at	3.54757	1.22326	31.3767	1.92626e-16	1.0952e-11	27.3178	AKR1C1, AKR1C2	1645, 1646
1555427_s_at	-2.11822	-0.393264	-31.1166	2.21278e-16	1.11831e-11	27.1997	SYNCRIP	10492
215071_s_at	3.28566	0.644829	29.5024	5.36893e-16	2.44205e-11	26.4356	HIST1H2AC	8334
231018_at	2.72367	0.474271	28.9108	7.51759e-16	3.05565e-11	26.1416	PALM3	342979
224826_at	-2.81647	-0.454044	-28.7895	8.06155e-16	3.05565e-11	26.0804	GPCPD1	56261
224797_at	-3.32512	-0.322966	-28.1775	1.1517e-15	4.0296e-11	25.7663	ARRDC3	57561
209025_s_at	-2.01273	-0.392584	-26.4628	3.26027e-15	9.32173e-11	24.8378	SYNCRIP	10492
235456_at	2.66415	0.428264	26.4069	3.37637e-15	9.32173e-11	24.8063
230492_s_at	-2.95087	-0.509218	-26.3601	3.47694e-15	9.32173e-11	24.7798	, GPCPD1	56261
215629_s_at	-3.17912	-0.724779	-26.3569	3.484e-15	9.32173e-11	24.778	DLEU2, DLEU2L	406948
209911_x_at	3.5111	0.665632	26.0919	4.11786e-15	1.04056e-10	24.6271	HIST1H2BE, HIST1H2BD	8344, 3017
239196_at	2.52081	0.375165	25.8602	4.77253e-15	1.14252e-10	24.4935	ANKRD22	118932
200810_s_at	-1.90158	-0.451877	-24.7058	1.01462e-14	2.30748e-10	23.8055	CIRBP	1153
200811_at	-2.00802	-0.473575	-24.4982	1.16614e-14	2.5087e-10	23.6777	CIRBP	1153
1568812_at	1.95269	0.433649	24.4392	1.2134e-14	2.5087e-10	23.6412		100507140
214141_x_at	-1.57847	-0.346587	-24.2641	1.36614e-14	2.70169e-10	23.532	SRSF7	6432
238439_at	3.14731	0.628934	23.9356	1.71014e-14	3.24106e-10	23.3246	ANKRD22	118932
232291_at	-2.40674	-0.426405	-23.8219	1.84965e-14	3.36524e-10	23.2521	MIR17HG	406952, 406953, 406979, 406980, 406982, 407048, 407975
208937_s_at	1.96128	0.153268	23.0102	3.27144e-14	5.7231e-10	22.722	ID1	3397
217150_s_at	-1.64277	-0.375466	-22.5547	4.5433e-14	7.4569e-10	22.4148
1554406_a_at	2.58795	0.515099	22.5405	4.59039e-14	7.4569e-10	22.4051	CLEC7A	64581
32209_at	1.45068	0.252321	22.4292	4.97895e-14	7.68421e-10	22.3289	SSSCA1, FAM89B	10534, 23625
225803_at	2.30137	0.319392	22.4049	5.0682e-14	7.68421e-10	22.3122	FBXO32	114907
1556769_a_at	3.07951	0.46994	22.2791	5.5585e-14	8.03878e-10	22.2255
227517_s_at	-1.76424	-0.296515	-22.2556	5.65553e-14	8.03878e-10	22.2092	GAS5	60674
208319_s_at	-2.04694	-0.522886	-22.0885	6.39977e-14	8.82098e-10	22.0929	RBM3	5935
212173_at	-1.9074	-0.358663	-21.8304	7.75883e-14	1.02742e-09	21.9114	AK2	204
1554794_a_at	-1.55595	-0.335689	-21.8054	7.90585e-14	1.02742e-09	21.8937	UBE3C	9690
226258_at	2.76202	0.55715	21.6205	9.08884e-14	1.14835e-09	21.7619	AMN1	196394
208673_s_at	-2.66199	-0.609952	-21.3614	1.10708e-13	1.36096e-09	21.5751	SRSF3	6428
204658_at	-1.83465	-0.399045	-21.2479	1.20787e-13	1.44579e-09	21.4925	TRA2A	29896
230748_at	-3.14214	-0.581873	-21.1213	1.33178e-13	1.55323e-09	21.3998	SLC16A6	9120
228702_at	2.0478	0.521697	21.0363	1.42258e-13	1.58788e-09	21.3371	LINC-PINT	378805
201890_at	-1.88364	-0.424592	-21.0281	1.43162e-13	1.58788e-09	21.3311	RRM2	6241
212484_at	1.48267	0.26267	20.9974	1.46622e-13	1.58788e-09	21.3084	SSSCA1, FAM89B	10534, 23625
209529_at	1.72064	0.569826	20.9168	1.56124e-13	1.65146e-09	21.2486	PLPP2	8612
225381_at	2.38856	0.56424	20.8737	1.6148e-13	1.66929e-09	21.2165	MIR100HG	399959
207038_at	-2.54166	-0.409911	-20.7372	1.79733e-13	1.81366e-09	21.1145	SLC16A6P1, SLC16A6	9120
201272_at	1.67052	0.377995	20.7042	1.84468e-13	1.81366e-09	21.0897	AKR1B1	231
1555854_at	4.24462	1.41605	20.6841	1.87408e-13	1.81366e-09	21.0746	AKR1C1, AKR1C2	1645, 1646
215331_at	2.91985	0.62857	20.6158	1.97812e-13	1.87447e-09	21.0231	MYH15	22989
200892_s_at	-1.51037	-0.28821	-20.5379	2.10414e-13	1.95319e-09	20.9641	TRA2B	6434
227919_at	5.25	0.977015	20.4915	2.18317e-13	1.98602e-09	20.9289	, UCA1	652995
227443_at	3.35904	0.834146	20.385	2.37682e-13	2.11979e-09	20.8477	LURAP1L	286343
217010_s_at	-1.79519	-0.243613	-20.2283	2.69536e-13	2.35766e-09	20.7273
206554_x_at	-2.01364	-0.438985	-20.1644	2.8379e-13	2.4215e-09	20.678	SETMAR	6419
210367_s_at	1.67714	0.0991534	20.1347	2.90689e-13	2.4215e-09	20.6549	PTGES	9536
208107_s_at	-2.05266	-0.457793	-20.1107	2.96376e-13	2.4215e-09	20.6364		81691
219263_at	3.38945	0.60521	20.0996	2.99064e-13	2.4215e-09	20.6277	RNF128	79589
235783_at	-1.29497	-0.197471	-20.0607	3.08649e-13	2.4215e-09	20.5975	MRTO4	51154
208672_s_at	-1.6846	-0.355124	-20.0602	3.08777e-13	2.4215e-09	20.5971	SRSF3	6428
226452_at	-2.3112	-0.396759	-19.8885	3.55147e-13	2.66548e-09	20.4628	PDK1	5163
222889_at	-1.8429	-0.404981	-19.8877	3.5538e-13	2.66548e-09	20.4622	DCLRE1B	64858
202488_s_at	1.70918	0.231455	19.8805	3.5747e-13	2.66548e-09	20.4565	FXYD3	5349, 102466205
204044_at	1.64567	0.309737	19.7464	3.99065e-13	2.92765e-09	20.3508	QPRT	23475
231332_at	2.11544	0.454555	19.6247	4.41269e-13	3.18588e-09	20.2541
223761_at	2.43397	0.443816	19.5514	4.68952e-13	3.33284e-09	20.1955	FGF19	9965
242414_at	1.77118	0.333977	19.5002	4.89358e-13	3.42436e-09	20.1544	QPRT	23475
203661_s_at	1.65171	0.411926	19.3631	5.48784e-13	3.78202e-09	20.0439	TMOD1	7111
212944_at	2.02185	0.319354	19.3424	5.58396e-13	3.79083e-09	20.0272	SLC5A3	6526
210387_at	2.36081	0.493504	19.2148	6.21704e-13	4.15855e-09	19.9235	HIST1H2BG	8339
200699_at	1.51011	0.312486	19.1847	6.37714e-13	4.20382e-09	19.899	KDELR2	11014
218894_s_at	-2.02689	-0.392834	-19.1262	6.70104e-13	4.35422e-09	19.8511	MAGOHB	55110
205024_s_at	-1.55403	-0.293334	-19.0847	6.94145e-13	4.44691e-09	19.817	RAD51	5888
228760_at	-1.87402	-0.387629	-18.9855	7.55391e-13	4.77206e-09	19.7352	SRSF8	10929
225310_at	-1.54593	-0.337356	-18.9565	7.74331e-13	4.80471e-09	19.7113	RBMX	27316
221521_s_at	-1.48817	-0.438342	-18.9454	7.81685e-13	4.80471e-09	19.7021	GINS2	51659
210683_at	1.84299	0.245807	18.7879	8.94898e-13	5.42724e-09	19.5711	NRTN	4902
210587_at	3.7553	0.577628	18.6512	1.0072e-12	6.02793e-09	19.4565	INHBE	83729
206037_at	1.70645	0.269487	18.636	1.02059e-12	6.02874e-09	19.4436	KYAT1	883
215125_s_at	3.11162	0.734957	18.6178	1.03686e-12	6.04634e-09	19.4283	UGT1A9, UGT1A4, UGT1A10, UGT1A3, UGT1A6, UGT1A8, UGT1A7, UGT1A1, UGT1A5	54600, 54657, 54575, 54659, 54578, 54576, 54577, 54658, 54579
222016_s_at	3.12446	0.545329	18.5732	1.07789e-12	6.20604e-09	19.3906	ZSCAN31	64288
205771_s_at	-1.63648	-0.306665	-18.5425	1.10713e-12	6.29472e-09	19.3646	AKAP7	9465
208763_s_at	1.48056	0.24182	18.4339	1.2175e-12	6.83678e-09	19.2723	TSC22D3	1831
209343_at	1.96075	0.334481	18.4083	1.24519e-12	6.90697e-09	19.2504	EFHD1	80303
227020_at	2.21541	0.395607	18.3816	1.2747e-12	6.98547e-09	19.2277	YPEL2	388403
210537_s_at	-1.55172	-0.402582	-18.2232	1.46606e-12	7.81795e-09	19.0916	TADA2A	6871
203662_s_at	1.59796	0.250453	18.2194	1.47105e-12	7.81795e-09	19.0883	TMOD1	7111
226368_at	1.68236	0.332531	18.2139	1.47817e-12	7.81795e-09	19.0836	CHST11	50515
53071_s_at	-1.71687	-0.369344	-18.0593	1.69635e-12	8.79279e-09	18.9494	OGFOD3	79701
230657_at	2.05476	0.202298	18.0387	1.72779e-12	8.79279e-09	18.9315	TMEM165	55858
204580_at	3.87519	1.00575	18.0361	1.73179e-12	8.79279e-09	18.9293	MMP12	4321
207332_s_at	2.63156	0.766221	18.031	1.73981e-12	8.79279e-09	18.9248	TFRC	7037
242088_at	2.01665	0.459257	17.9866	1.81043e-12	9.04912e-09	18.886	KLHL24	54800
223082_at	1.95272	0.474707	17.9289	1.90662e-12	9.42635e-09	18.8355	SH3KBP1	30011
223075_s_at	1.84295	0.346892	17.895	1.9657e-12	9.61395e-09	18.8057	AIF1L	83543
219517_at	1.5184	0.351297	17.8732	2.00485e-12	9.7011e-09	18.7864	ELL3,	80237
208691_at	2.06818	0.620311	17.857	2.0343e-12	9.73996e-09	18.7722	TFRC	7037
211091_s_at	-1.42344	-0.33318	-17.7134	2.31698e-12	1.09779e-08	18.6451	NF2	4771
1565525_a_at	1.92652	0.275191	17.661	2.43016e-12	1.13722e-08	18.5985	TCP11L2	255394
209891_at	-2.29578	-0.451879	-17.652	2.45022e-12	1.13722e-08	18.5904	SPC25	57405
204532_x_at	2.32626	0.567154	17.5733	2.63303e-12	1.20973e-08	18.52	UGT1A9, UGT1A4, UGT1A10, UGT1A3, UGT1A6, UGT1A8, UGT1A7, UGT1A1, UGT1A5	54600, 54657, 54575, 54659, 54578, 54576, 54577, 54658, 54579
238686_at	-1.81074	-0.309839	-17.5482	2.69443e-12	1.21657e-08	18.4975	FBXO3	26273
222705_s_at	-1.49643	-0.264731	-17.5312	2.73677e-12	1.21657e-08	18.4822	SLC25A15	10166
223830_s_at	1.72015	0.271203	17.5196	2.76595e-12	1.21657e-08	18.4718	TRIM5	85363
222240_s_at	2.39991	0.394918	17.5135	2.78149e-12	1.21657e-08	18.4663	ISYNA1	51477
230356_at	3.0507	0.52398	17.5134	2.78166e-12	1.21657e-08	18.4663	NKX1-2	390010
202831_at	2.43896	0.823042	17.3923	3.11031e-12	1.34735e-08	18.3569	GPX2	2877
228069_at	-1.71531	-0.327256	-17.3714	3.17096e-12	1.36067e-08	18.338	MTFR2	113115
236313_at	2.01784	0.433973	17.3435	3.25401e-12	1.38325e-08	18.3126	CDKN2B	1030
227067_x_at	-1.35813	-0.280261	-17.3103	3.35568e-12	1.41326e-08	18.2825	NBPF26, NBPF19, NOTCH2, NBPF14, NOTCH2NL,	101060226, 4853, 25832, 100996763, 388677
200753_x_at	-1.79891	-0.348525	-17.2865	3.43066e-12	1.4192e-08	18.2608	SRSF2	6427, 693221
229981_at	-1.91362	-0.46517	-17.2861	3.43218e-12	1.4192e-08	18.2604	SNX5	27131
225710_at	-1.46091	-0.314156	-17.181	3.78525e-12	1.52904e-08	18.1643	GNB4	59345
204608_at	-1.29145	-0.248015	-17.1782	3.79533e-12	1.52904e-08	18.1617	, ASL	435
229312_s_at	1.33356	0.142383	17.1772	3.79865e-12	1.52904e-08	18.1608	GKAP1	80318
227680_at	-1.28295	-0.279032	-17.1404	3.93198e-12	1.56882e-08	18.127	ZNF326	284695
239752_at	2.09764	0.389559	17.087	4.13392e-12	1.63505e-08	18.0778	CECR2	27443
221577_x_at	3.68127	0.545545	17.0687	4.20541e-12	1.64899e-08	18.061	GDF15	9518
230446_at	2.39497	0.39822	17.0253	4.38099e-12	1.70315e-08	18.0208
213164_at	2.02241	0.356974	16.9952	4.50692e-12	1.73726e-08	17.9929	SLC5A3	6526
202899_s_at	-1.80092	-0.382003	-16.9158	4.8585e-12	1.85547e-08	17.9191	SRSF3	6428
205992_s_at	1.79118	0.228686	16.9079	4.89518e-12	1.85547e-08	17.9117	IL15	3600
206102_at	-1.20413	-0.27211	-16.851	5.16719e-12	1.94239e-08	17.8585	GINS1	9837
209161_at	-1.14968	-0.227971	-16.8292	5.2752e-12	1.96446e-08	17.8382	PRPF4	9128
226425_at	1.81623	0.361217	16.8219	5.31228e-12	1.96446e-08	17.8313	CLIP4	79745
228774_at	-1.38437	-0.201364	-16.7377	5.7569e-12	2.11171e-08	17.7522	CEP78	84131
203186_s_at	2.4779	0.43997	16.7183	5.86495e-12	2.13413e-08	17.7338	S100A4	6275
1554114_s_at	-1.97619	-0.428533	-16.6758	6.10896e-12	2.20453e-08	17.6937	SSH2	85464
210087_s_at	-1.09452	-0.219286	-16.6621	6.18944e-12	2.20453e-08	17.6808	MPZL1	9019
205959_at	1.91373	0.42952	16.6589	6.20872e-12	2.20453e-08	17.6777	MMP13	4322
244743_x_at	-1.79509	-0.351678	-16.6516	6.25228e-12	2.20453e-08	17.6709	ZNF138	7697
204199_at	2.28726	0.310396	16.6013	6.56263e-12	2.28405e-08	17.6231	RALGPS1	9649
45288_at	1.52167	0.252536	16.5928	6.61661e-12	2.28405e-08	17.615	ABHD6	57406
215983_s_at	-1.75535	-0.33361	-16.5831	6.67872e-12	2.28405e-08	17.6058	UBXN8	7993
1554080_at	-1.22433	-0.295585	-16.5822	6.68449e-12	2.28405e-08	17.605	CNOT9	9125
227068_at	-1.20708	-0.175858	-16.5753	6.7289e-12	2.28405e-08	17.5985	PGK1	5230
201136_at	-1.0175	-0.243917	-16.5353	6.99459e-12	2.34734e-08	17.5603	PLP2	5355
223384_s_at	1.48674	0.364974	16.5317	7.01857e-12	2.34734e-08	17.5569	TRIM4	89122
206030_at	1.8022	0.31571	16.502	7.22367e-12	2.37418e-08	17.5285	ASPA	443
215215_s_at	-2.36225	-0.521329	-16.4959	7.26611e-12	2.37418e-08	17.5227		81691
218549_s_at	-1.23047	-0.218035	-16.4924	7.2908e-12	2.37418e-08	17.5194	RMDN1	51115
223974_at	2.3298	0.343875	16.4901	7.3076e-12	2.37418e-08	17.5171	DLGAP1-AS2
209008_x_at	-1.475	-0.452403	-16.4447	7.63638e-12	2.4634e-08	17.4737	KRT8P3, KRT8	3856
212175_s_at	-1.05017	-0.213066	-16.2974	8.81711e-12	2.82426e-08	17.3318	AK2,	204
227545_at	-1.26505	-0.292646	-16.2559	9.18334e-12	2.90817e-08	17.2916	BARD1	580
1560019_at	2.46866	0.362618	16.2533	9.20694e-12	2.90817e-08	17.289	DLGAP1-AS2
209753_s_at	-1.36622	-0.282063	-16.1652	1.00418e-11	3.15001e-08	17.2032	TMPO	7112
226189_at	3.34906	0.44331	16.1467	1.02266e-11	3.186e-08	17.1852	ITGB8	3696
225295_at	-1.56086	-0.319508	-16.1151	1.05512e-11	3.26475e-08	17.1543	SLC39A10	57181
219518_s_at	1.43645	0.294775	16.0884	1.08343e-11	3.32656e-08	17.1281	ELL3,	80237
203217_s_at	1.47601	0.281753	16.0825	1.08972e-11	3.32656e-08	17.1224	ST3GAL5	8869
230527_at	2.20206	0.529832	16.0598	1.11458e-11	3.37023e-08	17.1001
212930_at	1.23037	0.185266	16.0559	1.11884e-11	3.37023e-08	17.0963	ATP2B1	490
39249_at	1.61726	0.318368	16.0387	1.13819e-11	3.40593e-08	17.0794	AQP3	360
205749_at	4.13297	0.983968	16.0212	1.15813e-11	3.44298e-08	17.0622	CYP1A1	1543
224428_s_at	-2.29475	-0.550297	-16.0135	1.16702e-11	3.44687e-08	17.0546	CDCA7	83879
217834_s_at	-1.17046	-0.210602	-15.9795	1.20724e-11	3.52638e-08	17.0211	SYNCRIP	10492
202937_x_at	-1.15612	-0.281534	-15.9777	1.20945e-11	3.52638e-08	17.0193	RRP7A	27341
229872_s_at	1.3649	0.331687	15.9584	1.23298e-11	3.5721e-08	17.0002		100996720
222454_s_at	-1.10601	-0.205418	-15.9313	1.26677e-11	3.64677e-08	16.9734	PARVA	55742
221768_at	-1.92308	-0.362678	-15.844	1.38256e-11	3.95508e-08	16.8868	SFPQ	6421
230871_at	-1.22188	-0.247542	-15.7566	1.50976e-11	4.29194e-08	16.7996	DHX30	22907
1560498_at	2.94693	0.60299	15.7364	1.54095e-11	4.35341e-08	16.7793
226998_at	-1.30117	-0.302772	-15.7089	1.5843e-11	4.44825e-08	16.7518	NAA15	80155
225582_at	2.29835	0.508335	15.698	1.60197e-11	4.4694e-08	16.7408	ITPRIP	85450
213096_at	1.8608	0.345592	15.6921	1.61149e-11	4.4694e-08	16.7349	TMCC2	9911
227452_at	1.68696	0.364817	15.6805	1.63065e-11	4.49515e-08	16.7232	LINC00511	400619
229428_at	-1.87403	-0.499971	-15.6586	1.66729e-11	4.54477e-08	16.7011	TIMM23B	100652748
234944_s_at	-1.74107	-0.349127	-15.6546	1.67408e-11	4.54477e-08	16.6971	MTFR2	113115
236193_at	2.68718	0.621879	15.6519	1.67863e-11	4.54477e-08	16.6944
237502_at	-1.58075	-0.399437	-15.6421	1.69537e-11	4.56295e-08	16.6846
1558322_a_at	2.68794	0.503687	15.629	1.71819e-11	4.59714e-08	16.6713	PAQR9	344838
1557081_at	-1.30251	-0.341435	-15.6039	1.76267e-11	4.64785e-08	16.6459	RBM25	58517
221552_at	1.22849	0.230468	15.6025	1.76511e-11	4.64785e-08	16.6446	ABHD6	57406
224840_at	-1.06288	-0.225102	-15.601	1.76779e-11	4.64785e-08	16.6431	FKBP5	2289
203946_s_at	1.37466	0.367339	15.5677	1.8288e-11	4.78061e-08	16.6094	ARG2	384
239134_at	-1.48821	-0.381024	-15.5077	1.94447e-11	5.05395e-08	16.5485
243529_at	-1.19298	-0.284507	-15.5015	1.95683e-11	5.05715e-08	16.5422	MARS2	92935
239406_at	-1.28733	-0.231338	-15.4643	2.03301e-11	5.22436e-08	16.5043	ZSCAN9	7746
230406_at	2.10505	0.378078	15.4422	2.0795e-11	5.31381e-08	16.4818	ASS1	445
202351_at	1.21261	0.150684	15.4314	2.1028e-11	5.32812e-08	16.4707	ITGAV	3685
1554168_a_at	1.82827	0.471525	15.4288	2.10853e-11	5.32812e-08	16.468	SH3KBP1	30011
223518_at	-1.24832	-0.299145	-15.4192	2.1294e-11	5.3334e-08	16.4582	DFFA	1676
230134_s_at	-1.30614	-0.310831	-15.4127	2.14357e-11	5.3334e-08	16.4517	RC3H2	54542
202854_at	-1.12133	-0.234483	-15.409	2.15176e-11	5.3334e-08	16.4479	HPRT1	3251
227052_at	1.68609	0.429277	15.4022	2.16694e-11	5.3334e-08	16.4409	SMIM14	201895
244661_at	1.17233	0.292122	15.4012	2.16925e-11	5.3334e-08	16.4398	SOAT1	6646
213459_at	-1.73759	-0.304789	-15.3872	2.20067e-11	5.38157e-08	16.4255	RPL37A	6168
219078_at	-1.71895	-0.310117	-15.3683	2.24392e-11	5.458e-08	16.4062	GPATCH2	55105
226815_at	-1.43807	-0.3376	-15.3474	2.29303e-11	5.54777e-08	16.3847	TAMM41	132001
219991_at	1.28814	0.112972	15.3113	2.38021e-11	5.72824e-08	16.3476	SLC2A9	56606
224558_s_at	1.5722	0.259219	15.2982	2.41259e-11	5.76163e-08	16.3341	, MALAT1	378938
221676_s_at	-1.56122	-0.286524	-15.2937	2.42407e-11	5.76163e-08	16.3294	CORO1C	23603
219390_at	1.36706	0.231649	15.2882	2.43781e-11	5.76163e-08	16.3238	FKBP14	55033
231970_at	-1.44901	-0.246819	-15.2823	2.4529e-11	5.76163e-08	16.3177
33307_at	-1.05365	-0.244663	-15.2805	2.45742e-11	5.76163e-08	16.3158	RRP7A, RRP7BP	27341, 91695
215224_at	-1.3964	-0.211513	-15.2738	2.47454e-11	5.772e-08	16.3089	, RPL23	9349
237309_at	-1.92352	-0.317802	-15.2456	2.54813e-11	5.91333e-08	16.2798
221989_at	-1.26372	-0.272261	-15.2334	2.58058e-11	5.94279e-08	16.2672	SNORA70, RPL10	26778, 6134
232596_at	-1.40235	-0.346451	-15.2282	2.5944e-11	5.94279e-08	16.2619	DIAPH3	81624
218102_at	-1.1135	-0.289683	-15.2262	2.60002e-11	5.94279e-08	16.2597	DERA	51071
222630_at	-2.73419	-0.440775	-15.2044	2.65961e-11	6.02086e-08	16.2372	RFX7	64864
39248_at	5.37389	0.971458	15.204	2.66065e-11	6.02086e-08	16.2368	AQP3	360
202903_at	-1.47468	-0.39655	-15.1968	2.68067e-11	6.03613e-08	16.2293	LSM5	23658
205583_s_at	-1.09183	-0.30758	-15.1895	2.70131e-11	6.05265e-08	16.2217	ALG13	79868
218350_s_at	-0.975906	-0.230124	-15.1775	2.73518e-11	6.09849e-08	16.2093	GMNN	51053
207605_x_at	1.56493	0.28745	15.1669	2.76559e-11	6.13623e-08	16.1983	ZNF117	51351
202682_s_at	-1.0774	-0.156054	-15.1613	2.78198e-11	6.14188e-08	16.1924	USP4	7375
220924_s_at	1.01493	0.232324	15.1552	2.79958e-11	6.14188e-08	16.1861	SLC38A2	54407
232481_s_at	2.27191	0.396558	15.1521	2.80865e-11	6.14188e-08	16.1829	SLITRK6	84189
229264_at	1.59992	0.339319	15.1386	2.84867e-11	6.19957e-08	16.1688
35148_at	1.80823	0.353321	15.11	2.93522e-11	6.35753e-08	16.139
204669_s_at	1.31314	0.250707	15.0992	2.96864e-11	6.39944e-08	16.1278	RNF24	11237
204541_at	1.24818	0.33045	15.0916	2.99236e-11	6.42014e-08	16.1198	SEC14L2	23541
200875_s_at	-1.16753	-0.253982	-15.0704	3.05942e-11	6.47513e-08	16.0978	NOP56	10528, 100302138
230383_x_at	-1.8667	-0.19853	-15.0679	3.06774e-11	6.47513e-08	16.0951	SLFN5	162394
218156_s_at	-1.11049	-0.1552	-15.0632	3.08284e-11	6.47513e-08	16.0902	TSR1	55720
226372_at	1.96639	0.287208	15.0622	3.0861e-11	6.47513e-08	16.0891	CHST11	50515
234915_s_at	-1.13095	-0.228911	-15.0612	3.08917e-11	6.47513e-08	16.0881	DENR,	8562
216228_s_at	-1.40518	-0.198906	-15.0402	3.15813e-11	6.58931e-08	16.0661	WDHD1	11169
201288_at	-1.86179	-0.457	-15.0286	3.19694e-11	6.63984e-08	16.054	ARHGDIB	397
202520_s_at	-1.22325	-0.274229	-14.9855	3.34527e-11	6.91633e-08	16.0088	MLH1	4292
212314_at	1.35574	0.484362	14.9786	3.36982e-11	6.93555e-08	16.0015	SEL1L3	23231
213847_at	1.52129	0.235685	14.9638	3.42297e-11	7.01322e-08	15.9859	PRPH	5630
214882_s_at	-1.64845	-0.363509	-14.9411	3.50611e-11	7.14227e-08	15.962	SRSF2	6427, 693221
202690_s_at	-1.09217	-0.210807	-14.9381	3.51737e-11	7.14227e-08	15.9588	SNRPD1	6632
233011_at	-1.33489	-0.228495	-14.9307	3.54491e-11	7.1662e-08	15.951
206924_at	3.48566	0.859565	14.8608	3.81741e-11	7.68292e-08	15.8772	IL11	3589
241360_at	-1.79404	-0.203441	-14.8559	3.83764e-11	7.68962e-08	15.8719	CCDC15	80071
233780_at	-1.52775	-0.346598	-14.8183	3.99399e-11	7.96247e-08	15.8321	RIF1	55183
238122_at	-1.85807	-0.34357	-14.8148	4.00882e-11	7.96247e-08	15.8284	RBM12B	389677
211985_s_at	-2.05781	-0.4341	-14.8021	4.06353e-11	8.03603e-08	15.8149	CALM1	801, 805
220206_at	-1.54095	-0.271241	-14.7734	4.18993e-11	8.25014e-08	15.7843	ZMYM1	79830
203640_at	1.62125	0.164108	14.7558	4.26933e-11	8.33845e-08	15.7656	MBNL2	10150
218093_s_at	2.51163	0.444585	14.7554	4.27144e-11	8.33845e-08	15.7651	ANKRD10	55608
220651_s_at	-1.52351	-0.343581	-14.6385	4.84184e-11	9.41155e-08	15.64	MCM10	55388
203432_at	-1.12397	-0.304652	-14.6119	4.98244e-11	9.60969e-08	15.6114	TMPO	7112
204347_at	-1.50194	-0.247429	-14.6113	4.98603e-11	9.60969e-08	15.6107	AK4	205
209527_at	-1.09827	-0.257626	-14.6073	5.00731e-11	9.60999e-08	15.6064	EXOSC2	23404
228401_at	-1.1633	-0.339584	-14.5908	5.09729e-11	9.74157e-08	15.5886	ATAD2	29028
207076_s_at	2.10796	0.357004	14.5787	5.1642e-11	9.82816e-08	15.5756	ASS1	445
221582_at	1.40313	0.199534	14.5603	5.26791e-11	9.98375e-08	15.5557	HIST3H2A	92815
203045_at	1.49957	0.219358	14.5361	5.40784e-11	1.01084e-07	15.5296	NINJ1	4814
240263_at	-1.67549	-0.387658	-14.533	5.42579e-11	1.01084e-07	15.5262
204299_at	-1.59877	-0.365962	-14.5326	5.42814e-11	1.01084e-07	15.5258	SRSF10	10772
1558540_s_at	1.19558	0.267545	14.5256	5.46984e-11	1.01084e-07	15.5182	SLC2A11	66035
242900_at	-2.20318	-0.469419	-14.5245	5.47612e-11	1.01084e-07	15.517	ALG10B	144245
200754_x_at	-1.66461	-0.342209	-14.5241	5.47868e-11	1.01084e-07	15.5166	SRSF2	6427, 693221
222896_at	1.83559	0.375379	14.5223	5.48925e-11	1.01084e-07	15.5146	TMEM38A	79041
207618_s_at	-1.01874	-0.208658	-14.5137	5.54103e-11	1.01626e-07	15.5052	BCS1L	617
203390_s_at	1.60784	0.340559	14.4861	5.70913e-11	1.04178e-07	15.4754	KIF3C	3797
212589_at	1.03257	0.191158	14.4834	5.72598e-11	1.04178e-07	15.4724	RRAS2	22800
229050_s_at	1.31911	0.206831	14.4732	5.78967e-11	1.04917e-07	15.4614	, SNHG7	84973
219305_x_at	2.30187	0.47963	14.4569	5.89355e-11	1.06376e-07	15.4436	FBXO2	26232
1556211_a_at	-2.04381	-0.442912	-14.433	6.04862e-11	1.08743e-07	15.4176
239817_at	-1.85902	-0.520165	-14.424	6.10809e-11	1.0938e-07	15.4078
203038_at	0.946684	0.108919	14.4116	6.19136e-11	1.10436e-07	15.3943	PTPRK	5796
219526_at	-1.17342	-0.158645	-14.3932	6.3172e-11	1.11846e-07	15.3742	C14orf169	79697
227993_at	-1.87578	-0.448435	-14.3928	6.31959e-11	1.11846e-07	15.3738	METAP2	10988
204603_at	-1.28934	-0.243766	-14.3692	6.48509e-11	1.14331e-07	15.348	EXO1	9156
224919_at	0.97401	0.180101	14.3078	6.93632e-11	1.21758e-07	15.2807	MRPS6	64968
226936_at	-1.2541	-0.249294	-14.3047	6.95991e-11	1.21758e-07	15.2773	CENPW	387103
212886_at	1.23659	0.205925	14.2991	7.00278e-11	1.22038e-07	15.2711	CCDC69	26112
203778_at	1.32752	0.168574	14.2955	7.03068e-11	1.22057e-07	15.2671	MANBA	4126
225912_at	1.83215	0.31077	14.2894	7.07771e-11	1.22406e-07	15.2605	TP53INP1	94241
231203_at	1.41448	0.271647	14.2605	7.30601e-11	1.25876e-07	15.2287		100505478
238646_at	-1.39141	-0.304157	-14.2566	7.33763e-11	1.25944e-07	15.2244
223241_at	-1.13923	-0.22315	-14.2272	7.5792e-11	1.29601e-07	15.192	SNX8	29886, 102465503
230193_at	-1.12481	-0.136295	-14.2218	7.62467e-11	1.2989e-07	15.186	WDR66	144406
223235_s_at	3.14574	0.687929	14.218	7.6568e-11	1.29951e-07	15.1818	SMOC2	64094
219212_at	-1.12606	-0.21266	-14.1989	7.82021e-11	1.31753e-07	15.1606	HSPA14	51182
222583_s_at	-1.29413	-0.2011	-14.1988	7.8209e-11	1.31753e-07	15.1605	NUP50,	10762
231772_x_at	-1.00506	-0.223337	-14.1935	7.8665e-11	1.32032e-07	15.1547	CENPH	64946
217890_s_at	-1.02883	-0.271661	-14.1662	8.10784e-11	1.35582e-07	15.1244	PARVA	55742
222067_x_at	2.02818	0.439551	14.1466	8.28593e-11	1.38038e-07	15.1027	HIST1H2BD	3017
222444_at	1.05919	0.335918	14.1434	8.31541e-11	1.38038e-07	15.0991	ARMCX3	51566
232899_at	-1.07201	-0.214252	-14.1313	8.42731e-11	1.386e-07	15.0857	CENPBD1P1, RPL23AP82, , FAM41C	65996, 284593
239680_at	-1.52861	-0.437962	-14.1312	8.42838e-11	1.386e-07	15.0856	WDR76	79968
222825_at	-1.36455	-0.26157	-14.1299	8.44065e-11	1.386e-07	15.0842	OTUD6B	51633
1552682_a_at	-1.64632	-0.279879	-14.0666	9.05618e-11	1.48e-07	15.0136	CASC5	57082
244766_at	-1.61844	-0.242146	-14.0644	9.07817e-11	1.48e-07	15.0112	SMG1P7, SMG1	100506060, 23049
210255_at	-1.31605	-0.231824	-14.0448	9.279e-11	1.50734e-07	14.9893	RAD51B	5890
203710_at	1.06125	0.36571	14.0323	9.40907e-11	1.51997e-07	14.9753	ITPR1	3708
203947_at	-1.5731	-0.25316	-14.0309	9.42363e-11	1.51997e-07	14.9738	CSTF3	1479
212171_x_at	1.4125	0.32978	14.0173	9.5684e-11	1.53787e-07	14.9585	VEGFA	7422
228286_at	-2.27447	-0.4234	-13.9926	9.83596e-11	1.57531e-07	14.9309	GEN1	348654
1556210_at	-1.32254	-0.315235	-13.9815	9.95834e-11	1.58931e-07	14.9185
201323_at	-0.962517	-0.188936	-13.946	1.03628e-10	1.64807e-07	14.8786	EBNA1BP2	10969, 102465439
221987_s_at	-1.02712	-0.175582	-13.9394	1.04395e-10	1.65449e-07	14.8712	TSR1	55720
212037_at	-1.27907	-0.355667	-13.9264	1.05937e-10	1.67212e-07	14.8565	PNN	5411
200783_s_at	-1.01428	-0.198116	-13.9238	1.06243e-10	1.67212e-07	14.8536	STMN1	3925, 100500808
202420_s_at	-0.926384	-0.194748	-13.9108	1.07806e-10	1.69087e-07	14.8389	DHX9	1660
210867_at	1.23653	0.293033	13.9061	1.08379e-10	1.69402e-07	14.8336	CNOT4	4850
206094_x_at	2.2481	0.524628	13.8981	1.09356e-10	1.70269e-07	14.8246	UGT1A9, UGT1A4, UGT1A10, UGT1A3, UGT1A6, UGT1A8, UGT1A7, UGT1A1, UGT1A5	54600, 54657, 54575, 54659, 54578, 54576, 54577, 54658, 54579
221891_x_at	-1.05077	-0.19253	-13.8955	1.09682e-10	1.70269e-07	14.8216	SNORD14E, HSPA8P8, HSPA8	85391, 3312
225348_at	-1.71547	-0.471004	-13.8897	1.10397e-10	1.70575e-07	14.8151	SRSF10	10772
209046_s_at	0.892649	0.145105	13.8878	1.10629e-10	1.70575e-07	14.813	GABARAPL2	11345
214960_at	-1.32323	-0.199496	-13.8837	1.11146e-10	1.70792e-07	14.8083	API5	8539
227298_at	-1.77865	-0.358028	-13.8642	1.13617e-10	1.74002e-07	14.7863	TRAM2-AS1	401264
202330_s_at	-1.10555	-0.259158	-13.8547	1.14842e-10	1.75288e-07	14.7755	UNG	7374
210180_s_at	-1.34971	-0.268773	-13.8467	1.15885e-10	1.76192e-07	14.7664	TRA2B	6434
218738_s_at	-1.19918	-0.254314	-13.8442	1.16209e-10	1.76192e-07	14.7636	RNF138	51444
212552_at	2.02352	0.508417	13.84	1.16755e-10	1.76431e-07	14.7589	HPCAL1	3241
226158_at	1.45053	0.368195	13.8352	1.17399e-10	1.76818e-07	14.7534	KLHL24	54800
224320_s_at	-1.00075	-0.192712	-13.8145	1.20168e-10	1.8039e-07	14.73	MCM8	84515
230518_at	1.27089	0.345945	13.808	1.2106e-10	1.81131e-07	14.7226	MPZL2	10205
206108_s_at	-1.26511	-0.34169	-13.7992	1.22265e-10	1.82163e-07	14.7126	SRSF6,	6431
216548_x_at	-0.994483	-0.168876	-13.7972	1.22551e-10	1.82163e-07	14.7103	HMGB3P1
207891_s_at	-1.02173	-0.218585	-13.7634	1.27336e-10	1.88659e-07	14.6719	HAUS7, TREX2	55559, 11219
202883_s_at	-1.05369	-0.241107	-13.757	1.28263e-10	1.89416e-07	14.6646	PPP2R1B	5519
218997_at	-0.950924	-0.208402	-13.7518	1.29023e-10	1.89922e-07	14.6587	POLR1E	64425
204510_at	-1.26289	-0.233677	-13.7469	1.29742e-10	1.90365e-07	14.6531	CDC7	8317
213365_at	-1.30312	-0.248463	-13.7435	1.30237e-10	1.90476e-07	14.6493	ERI2	112479
209160_at	2.9681	0.765987	13.7395	1.3083e-10	1.9073e-07	14.6447	AKR1C3	8644
206857_s_at	1.24401	0.256108	13.7312	1.32069e-10	1.91766e-07	14.6352	FKBP1B, MFSD2B	2281, 388931
224690_at	1.19784	0.312463	13.7292	1.32384e-10	1.91766e-07	14.6328	FAM210B	116151
230133_at	-1.28437	-0.233911	-13.7054	1.36006e-10	1.96388e-07	14.6057	RC3H2	54542
214126_at	1.22418	0.27048	13.6964	1.37414e-10	1.97574e-07	14.5954
205345_at	-1.17609	-0.255672	-13.6926	1.38e-10	1.97574e-07	14.5911	BARD1	580
209122_at	1.9281	0.635925	13.6918	1.38131e-10	1.97574e-07	14.5902	PLIN2	123
203752_s_at	1.54047	0.295607	13.6843	1.39326e-10	1.97822e-07	14.5815	JUND	3727
212633_at	-1.53111	-0.317371	-13.6801	1.39995e-10	1.97822e-07	14.5767	UFL1	23376
228162_at	-1.15757	-0.205916	-13.676	1.40643e-10	1.97822e-07	14.5721	ESD	2098
235033_at	-1.38345	-0.226019	-13.6758	1.40674e-10	1.97822e-07	14.5719
243938_x_at	-1.97902	-0.474114	-13.6752	1.40778e-10	1.97822e-07	14.5711	DNAH5	1767
229283_at	-1.20686	-0.25811	-13.6743	1.40914e-10	1.97822e-07	14.5701
239143_x_at	-1.15165	-0.287773	-13.6677	1.41989e-10	1.98718e-07	14.5625	RNF138	51444
1562019_at	2.42766	0.656362	13.6385	1.46789e-10	2.04806e-07	14.5291	NT5DC4	284958
219258_at	-1.60707	-0.341222	-13.6346	1.47449e-10	2.05098e-07	14.5246	TIPIN	54962
224629_at	0.881357	0.129937	13.6036	1.52779e-10	2.11863e-07	14.4889	LMAN1	3998
229028_s_at	-1.04373	-0.298571	-13.5975	1.5385e-10	2.127e-07	14.4819	ARL17B	51326, 100506084, 100996709
218270_at	-0.936476	-0.181556	-13.5917	1.54876e-10	2.1347e-07	14.4752	MRPL24	79590
207388_s_at	1.52998	0.141606	13.5827	1.56492e-10	2.15046e-07	14.4648	PTGES	9536
206214_at	1.2108	0.213196	13.5653	1.59639e-10	2.18215e-07	14.4448	PLA2G7	7941
235027_at	-1.49965	-0.280429	-13.5647	1.59757e-10	2.18215e-07	14.4441	ZNF736	728927
1560297_at	-1.22431	-0.261278	-13.5515	1.62187e-10	2.2087e-07	14.4289	HM13-IT1
235309_at	1.21113	0.29233	13.5436	1.63676e-10	2.22232e-07	14.4197	RPS15A	6210
204162_at	-1.46887	-0.304273	-13.5367	1.64975e-10	2.2333e-07	14.4118	NDC80	10403
201111_at	-1.06658	-0.286241	-13.5162	1.6891e-10	2.27977e-07	14.3881	CSE1L	1434
227865_at	-1.33748	-0.369848	-13.5	1.72096e-10	2.3159e-07	14.3693	IDNK	414328
201129_at	-1.75708	-0.469884	-13.485	1.75112e-10	2.34954e-07	14.3518	SRSF7	6432
215716_s_at	1.34639	0.253771	13.4796	1.76203e-10	2.35723e-07	14.3456	ATP2B1	490
209024_s_at	-1.01715	-0.19648	-13.4635	1.79507e-10	2.39438e-07	14.3269	, SYNCRIP	10492
207590_s_at	-1.63488	-0.274741	-13.4531	1.81668e-10	2.41612e-07	14.3149	CENPI	2491
236077_at	-0.986845	-0.187765	-13.435	1.85525e-10	2.45565e-07	14.2937	GANC	2595
202708_s_at	2.51772	0.41488	13.4341	1.8572e-10	2.45565e-07	14.2927	HIST2H2BE	8349
208596_s_at	2.38289	0.644566	13.429	1.86822e-10	2.46307e-07	14.2867	UGT1A9, UGT1A4, UGT1A10, UGT1A3, UGT1A6, UGT1A8, UGT1A7, UGT1A1, UGT1A5	54600, 54657, 54575, 54659, 54578, 54576, 54577, 54658, 54579
226185_at	1.23293	0.236637	13.4228	1.88156e-10	2.47349e-07	14.2796	CDS1	1040
225462_at	-1.02301	-0.230915	-13.4171	1.89404e-10	2.48271e-07	14.2729	TMEM128	85013
211984_at	-1.9242	-0.411335	-13.408	1.91423e-10	2.50197e-07	14.2623	CALM1	801, 805
211800_s_at	-0.867047	-0.110901	-13.3962	1.94062e-10	2.52919e-07	14.2485	USP4	7375
201743_at	1.55289	0.0206151	13.3892	1.9564e-10	2.54247e-07	14.2403	CD14	929
205739_x_at	-2.46404	-0.44872	-13.3815	1.97387e-10	2.55786e-07	14.2314	ZNF107	51427
218041_x_at	0.940804	0.217419	13.3591	2.02604e-10	2.61801e-07	14.2052	SLC38A2	54407
1555772_a_at	-1.55633	-0.343789	-13.3519	2.04298e-10	2.63243e-07	14.1968	CDC25A	993
204447_at	1.32437	0.259941	13.335	2.08373e-10	2.67734e-07	14.1769		9762
230728_at	1.58757	0.260211	13.3232	2.11248e-10	2.70665e-07	14.1631	FKBP14	55033
219132_at	2.32205	0.495171	13.3075	2.15171e-10	2.74916e-07	14.1446	PELI2	57161
207850_at	-1.37116	-0.33611	-13.2896	2.19693e-10	2.79907e-07	14.1237	CXCL3	2921
207126_x_at	2.21407	0.500206	13.2859	2.20643e-10	2.80332e-07	14.1193	UGT1A9, UGT1A4, UGT1A10, UGT1A3, UGT1A6, UGT1A8, UGT1A7, UGT1A1, UGT1A5	54600, 54657, 54575, 54659, 54578, 54576, 54577, 54658, 54579
236692_at	-1.45393	-0.280453	-13.2836	2.21261e-10	2.80335e-07	14.1165
218875_s_at	-1.4394	-0.364782	-13.2688	2.25109e-10	2.84418e-07	14.0992	FBXO5	26271
239392_s_at	-1.51205	-0.335737	-13.262	2.26899e-10	2.85886e-07	14.0912	POGK	57645
222804_x_at	1.03888	0.24486	13.246	2.31205e-10	2.90507e-07	14.0723	DCAF10	79269
241689_at	1.09319	0.192479	13.2428	2.32061e-10	2.90779e-07	14.0686	METTL14	57721
218710_at	-0.90864	-0.179437	-13.2279	2.36166e-10	2.95109e-07	14.0509	TTC27	55622
211668_s_at	1.2818	0.20481	13.2064	2.4218e-10	3.01795e-07	14.0256	PLAU	5328
226312_at	1.35506	0.30256	13.2022	2.43381e-10	3.02463e-07	14.0206	RICTOR	253260
241393_at	-1.38875	-0.304115	-13.1951	2.45432e-10	3.04181e-07	14.0121	, IPP	3652
229097_at	-0.880885	-0.234138	-13.1853	2.48287e-10	3.06883e-07	14.0005	DIAPH3	81624
226747_at	0.87538	0.0766918	13.1772	2.50646e-10	3.08959e-07	13.991	TXNDC16	57544
1560739_a_at	-2.06455	-0.347087	-13.1747	2.51394e-10	3.09043e-07	13.988
206746_at	1.69363	0.366248	13.1625	2.55041e-10	3.12682e-07	13.9735	, BFSP1	631
235927_at	-1.30166	-0.223994	-13.1485	2.59267e-10	3.1635e-07	13.9569	XPO1	7514
216568_x_at	-1.12379	-0.321933	-13.148	2.59424e-10	3.1635e-07	13.9563
210592_s_at	1.02611	0.259005	13.1442	2.60577e-10	3.16358e-07	13.9519	SAT1	6303
204080_at	-0.93049	-0.228319	-13.1434	2.60821e-10	3.16358e-07	13.9509	TOE1	114034
235168_at	-1.33277	-0.336451	-13.1363	2.63014e-10	3.18169e-07	13.9425	PIGM	93183
203091_at	-1.06487	-0.206137	-13.1321	2.64335e-10	3.18919e-07	13.9374	FUBP1	8880
205909_at	-1.65348	-0.305964	-13.1085	2.71806e-10	3.27065e-07	13.9094	POLE2	5427
209256_s_at	0.972675	0.148127	13.1018	2.73969e-10	3.28798e-07	13.9014	KLHDC10	23008
241762_at	1.65484	0.146897	13.091	2.77501e-10	3.32161e-07	13.8885	FBXO32	114907
223493_at	-2.0228	-0.414781	-13.0869	2.78831e-10	3.32293e-07	13.8836	FBXO4	26272
218663_at	-1.4533	-0.286909	-13.0862	2.79073e-10	3.32293e-07	13.8828	NCAPG	64151
212977_at	1.84786	0.476834	13.082	2.80457e-10	3.33069e-07	13.8778	ACKR3	57007
203542_s_at	1.55406	0.403281	13.0786	2.81604e-10	3.3356e-07	13.8737	KLF9	687
1552739_s_at	-1.49563	-0.362668	-13.0575	2.88719e-10	3.411e-07	13.8485	ST7L	54879
218678_at	1.09864	0.260897	13.0465	2.92524e-10	3.43471e-07	13.8353	NES	10763
223441_at	1.19193	0.268976	13.0442	2.93311e-10	3.43471e-07	13.8326	SLC17A5	26503
234295_at	-1.37037	-0.241868	-13.0436	2.93514e-10	3.43471e-07	13.8319	DBR1	51163
205036_at	-0.937703	-0.170984	-13.0429	2.93747e-10	3.43471e-07	13.8311	LSM6	11157
202364_at	1.00705	0.238012	13.0282	2.98917e-10	3.4862e-07	13.8136	MXI1	4601
224478_s_at	-1.37953	-0.265206	-13.0177	3.02668e-10	3.5161e-07	13.801	C7orf50	84310
228274_at	-1.77186	-0.371859	-13.0167	3.03027e-10	3.5161e-07	13.7998	SDSL	113675
219257_s_at	1.68201	0.500491	13.0095	3.05651e-10	3.53112e-07	13.7911	SPHK1	8877
201192_s_at	-1.05807	-0.266634	-13.0089	3.05874e-10	3.53112e-07	13.7904	PITPNA	5306
225786_at	-1.18885	-0.187205	-12.9863	3.14193e-10	3.61798e-07	13.7633	HNRNPU	3192
229566_at	1.76986	0.255392	12.9769	3.1775e-10	3.6497e-07	13.752	WFDC21P
221986_s_at	2.79708	0.733731	12.9746	3.18627e-10	3.65055e-07	13.7492	KLHL24	54800
203140_at	1.94031	0.360324	12.9558	3.25827e-10	3.71131e-07	13.7267	BCL6	604
202082_s_at	1.23384	0.285573	12.9554	3.25988e-10	3.71131e-07	13.7262	SEC14L1	6397
231897_at	0.949362	0.271408	12.9543	3.26435e-10	3.71131e-07	13.7248	, PTGR1	22949
209938_at	-1.36126	-0.310262	-12.9523	3.27194e-10	3.71131e-07	13.7224	TADA2A	6871
210706_s_at	0.997663	0.207555	12.9446	3.30242e-10	3.73657e-07	13.7131	RNF24	11237
222118_at	-1.20621	-0.295836	-12.9339	3.34474e-10	3.77506e-07	13.7003	CENPN	55839
204671_s_at	-1.61741	-0.30378	-12.9259	3.37694e-10	3.80197e-07	13.6906	ANKRD6	22881
208687_x_at	-1.36551	-0.266517	-12.9222	3.39189e-10	3.80938e-07	13.6861	SNORD14E, HSPA8	85391, 3312
218537_at	1.74879	0.190414	12.9062	3.45735e-10	3.8675e-07	13.6669	HCFC1R1	54985
206785_s_at	2.37603	0.0235387	12.9047	3.46352e-10	3.8675e-07	13.6651	KLRC1, KLRC2	3821, 3822
205053_at	-1.07935	-0.250839	-12.9034	3.46916e-10	3.8675e-07	13.6634	PRIM1	5557
203816_at	-0.888543	-0.218679	-12.8756	3.58673e-10	3.9888e-07	13.6298	DGUOK	1716
1555325_s_at	-1.62703	-0.245551	-12.8686	3.61663e-10	4.00999e-07	13.6214	ZNF26	7574
234192_s_at	1.60848	0.13421	12.8671	3.62342e-10	4.00999e-07	13.6195	GKAP1	80318
1556195_a_at	-1.11855	-0.186876	-12.8555	3.67429e-10	4.05642e-07	13.6055
226787_at	-1.16044	-0.211848	-12.8517	3.69091e-10	4.05649e-07	13.6009	ZNF18,	7566
213238_at	1.07636	0.232761	12.8514	3.69219e-10	4.05649e-07	13.6006	ATP10D	57205
227638_at	-1.1444	-0.162298	-12.8352	3.76491e-10	4.12642e-07	13.5809	EPG5	57724
206226_at	1.37986	0.274956	12.8328	3.77592e-10	4.12854e-07	13.578	HRG	3273
201478_s_at	-0.772143	-0.193019	-12.8269	3.80275e-10	4.1479e-07	13.5708	DKC1	1736, 100847052
224574_at	-1.13374	-0.235732	-12.8189	3.83921e-10	4.17765e-07	13.5612	C17orf49, RNASEK-C17orf49	124944
200941_at	1.45755	0.325253	12.8048	3.90523e-10	4.23935e-07	13.544	HSBP1	3281
206110_at	2.01343	0.489324	12.7989	3.93289e-10	4.25921e-07	13.5369	HIST1H3H	8357
1560011_at	1.93935	0.452977	12.7964	3.94468e-10	4.26183e-07	13.5338	JRK	8629
221963_x_at	-1.8908	-0.317804	-12.7865	3.99217e-10	4.30292e-07	13.5218	ZNF587B	100293516
205042_at	1.44946	0.121988	12.7787	4.02995e-10	4.32742e-07	13.5123	GNE	10020
244669_at	-1.91974	-0.303983	-12.7779	4.03393e-10	4.32742e-07	13.5113	SNORD50B, SNHG5
218622_at	-0.953531	-0.16416	-12.7614	4.11515e-10	4.39705e-07	13.4911	NUP37	79023
223469_at	1.19056	0.299848	12.7608	4.11817e-10	4.39705e-07	13.4904	PGPEP1	54858
230721_at	1.51463	0.407749	12.7574	4.13512e-10	4.40481e-07	13.4863	C16orf52	730094, 102725138
238962_at	-1.10995	-0.334663	-12.7453	4.19624e-10	4.45946e-07	13.4715	ZNF681	148213
213223_at	1.16804	0.344935	12.7372	4.23744e-10	4.49276e-07	13.4616	RPL28	6158, 102465483
224990_at	1.69503	0.47063	12.7277	4.28611e-10	4.53218e-07	13.4501	SMIM14	201895
219534_x_at	2.5652	0.600716	12.7231	4.31018e-10	4.53218e-07	13.4444	CDKN1C	1028
208606_s_at	1.4069	0.156437	12.7228	4.31193e-10	4.53218e-07	13.444	WNT4	54361
220012_at	1.3057	0.196494	12.7223	4.31448e-10	4.53218e-07	13.4434	ERO1B	56605
206934_at	1.21659	0.22925	12.7103	4.37757e-10	4.58786e-07	13.4287	SIRPB1	10326
219288_at	-1.14904	-0.213268	-12.7001	4.43234e-10	4.63458e-07	13.4162	C3orf14	57415
224663_s_at	-1.19346	-0.185121	-12.6922	4.47506e-10	4.66852e-07	13.4065	CFL2	1073
226060_at	-0.924559	-0.20357	-12.6889	4.49305e-10	4.67656e-07	13.4025	RFT1	91869
225158_at	-0.995438	-0.215861	-12.6822	4.52953e-10	4.70377e-07	13.3943	GFM1	85476
230822_at	1.55586	0.349783	12.6635	4.63369e-10	4.80097e-07	13.3713	TMEM61	199964
1562386_s_at	-0.97775	-0.154041	-12.6413	4.76059e-10	4.92124e-07	13.3441	ZNF501	115560
217721_at	-1.41684	-0.432652	-12.6372	4.7846e-10	4.92632e-07	13.339	SEPT7	989
200615_s_at	-1.24469	-0.258513	-12.6367	4.78716e-10	4.92632e-07	13.3384	AP2B1	163
203343_at	1.39549	0.371587	12.6336	4.80532e-10	4.93195e-07	13.3346	UGDH	7358
1564372_s_at	-1.37241	-0.45471	-12.6321	4.81432e-10	4.93195e-07	13.3327	CASC2	255082
223096_at	-1.09852	-0.235883	-12.63	4.82623e-10	4.93305e-07	13.3302	NOP58	51602
1568815_a_at	-1.29757	-0.343466	-12.6222	4.87237e-10	4.96903e-07	13.3206
219650_at	-1.25539	-0.26491	-12.6125	4.93077e-10	5.01735e-07	13.3086	ERCC6L	54821
37547_at	1.3068	0.254357	12.585	5.09872e-10	5.17667e-07	13.2748	BBS9	27241
219045_at	1.55265	0.296724	12.5794	5.13425e-10	5.20112e-07	13.2677	RHOF	54509
1552304_at	-1.22924	-0.246543	-12.5707	5.18882e-10	5.24473e-07	13.2571	ALG10	84920
222843_at	-0.949787	-0.225737	-12.5639	5.23233e-10	5.27698e-07	13.2486	FIGNL1	63979
206118_at	1.80428	0.380916	12.5459	5.34857e-10	5.38227e-07	13.2264	STAT4	6775
227889_at	0.959628	0.178902	12.5425	5.37117e-10	5.39308e-07	13.2222	LPCAT2	54947
232752_at	-1.62547	-0.41164	-12.5379	5.40136e-10	5.41145e-07	13.2165	LOXL1-AS1	100287616
227719_at	-1.63212	-0.229045	-12.5247	5.48945e-10	5.4798e-07	13.2002	SMAD9	4093
223136_at	-0.916427	-0.325761	-12.5215	5.51106e-10	5.4798e-07	13.1962	AIG1	51390
205691_at	1.93776	0.482299	12.5213	5.51295e-10	5.4798e-07	13.1958	SYNGR3	9143
224187_x_at	-1.16837	-0.221633	-12.5185	5.53158e-10	5.4798e-07	13.1924	SNORD14E, HSPA8	85391, 3312
222483_at	-0.978293	-0.255998	-12.5182	5.53373e-10	5.4798e-07	13.192	EFHD2	79180
227983_at	0.949689	0.197994	12.517	5.54186e-10	5.4798e-07	13.1906	RILPL2	196383
1555812_a_at	-1.83815	-0.45003	-12.5112	5.58109e-10	5.49511e-07	13.1834	ARHGDIB	397
243661_at	-1.70639	-0.465775	-12.5112	5.58151e-10	5.49511e-07	13.1834	ZNF273	10793
231944_at	1.29602	0.204809	12.5073	5.60853e-10	5.50978e-07	13.1785	ERO1B	56605
205394_at	-1.19021	-0.200667	-12.4955	5.69027e-10	5.56467e-07	13.1639	CHEK1	1111
205891_at	1.55197	0.282621	12.4948	5.69475e-10	5.56467e-07	13.1631	ADORA2B	136
204807_at	-1.1278	-0.241288	-12.4923	5.71238e-10	5.56467e-07	13.1599	TMEM5	10329
202907_s_at	-0.90344	-0.270423	-12.4922	5.71334e-10	5.56467e-07	13.1598	NBN	4683
208863_s_at	-1.02579	-0.252753	-12.4833	5.77586e-10	5.61355e-07	13.1488	SRSF1	6426
224856_at	-1.03422	-0.230522	-12.474	5.84288e-10	5.66658e-07	13.1371	FKBP5	2289
203358_s_at	-1.03792	-0.24628	-12.466	5.9005e-10	5.70524e-07	13.1272	EZH2	2146
220685_at	1.23489	0.190894	12.465	5.90783e-10	5.70524e-07	13.1259	FAM120C	54954
222455_s_at	-0.995834	-0.269569	-12.4622	5.92804e-10	5.71262e-07	13.1225	PARVA	55742
213988_s_at	1.36427	0.321013	12.4599	5.94484e-10	5.71501e-07	13.1196	SAT1	6303
218533_s_at	1.05269	0.135586	12.4584	5.95565e-10	5.71501e-07	13.1178	UCKL1	54963, 100302137
219880_at	1.38308	0.217723	12.4528	5.99747e-10	5.74303e-07	13.1107
243840_at	-1.07898	-0.278921	-12.4498	6.01948e-10	5.752e-07	13.107
218651_s_at	1.53411	0.214513	12.4416	6.08095e-10	5.79855e-07	13.0967	LARP6	55323
218493_at	-0.841541	-0.231477	-12.4365	6.11913e-10	5.82276e-07	13.0904	SNRNP25	79622
229947_at	1.40651	0.294198	12.4309	6.16144e-10	5.85077e-07	13.0835	PI15	51050
225470_at	-0.914615	-0.147926	-12.4266	6.19407e-10	5.8695e-07	13.0781	NUP35	129401
225837_at	-1.12279	-0.22047	-12.4237	6.21679e-10	5.87879e-07	13.0744	RHNO1	83695
214211_at	2.02078	0.534131	12.4123	6.30473e-10	5.93968e-07	13.0602	FTH1	2495
211784_s_at	-1.01986	-0.258646	-12.412	6.3073e-10	5.93968e-07	13.0598	SRSF1	6426
234597_at	-0.964849	-0.391332	-12.3978	6.41894e-10	6.02897e-07	13.0421
222869_s_at	-1.12904	-0.326862	-12.3966	6.42863e-10	6.02897e-07	13.0405	ELAC1	55520
1555758_a_at	-1.0732	-0.295641	-12.3762	6.59285e-10	6.17026e-07	13.015	CDKN3	1033
213899_at	-2.01185	-0.440967	-12.3682	6.65842e-10	6.21509e-07	13.005	METAP2	10988
222962_s_at	-1.47458	-0.397948	-12.367	6.66807e-10	6.21509e-07	13.0036	MCM10	55388
1555892_s_at	-1.72155	-0.428811	-12.3625	6.70533e-10	6.23703e-07	12.9979	PSMD5-AS1
241720_at	-1.63591	-0.34214	-12.3566	6.75478e-10	6.2702e-07	12.9905	ZNF326	284695
225841_at	-1.24896	-0.269185	-12.3546	6.7714e-10	6.27283e-07	12.988	HENMT1	113802
239273_s_at	1.45081	0.249307	12.3267	7.01062e-10	6.48124e-07	12.9529	MMP28	79148
209773_s_at	-1.00025	-0.239187	-12.3182	7.08443e-10	6.53619e-07	12.9423	RRM2	6241
223059_s_at	1.56301	0.282054	12.2909	7.32943e-10	6.73479e-07	12.9079	FAM107B	83641
1554678_s_at	-0.984681	-0.214291	-12.2906	7.33269e-10	6.73479e-07	12.9075	HNRNPDL	9987
1553313_s_at	1.73605	0.329363	12.2893	7.34411e-10	6.73479e-07	12.9059	SLC5A3	6526
222740_at	-0.936784	-0.2297	-12.2805	7.42572e-10	6.79593e-07	12.8947	ATAD2	29028
230556_at	-1.51238	-0.309863	-12.2674	7.54723e-10	6.89327e-07	12.8783	IMMP1L	196294
204731_at	1.55975	0.36804	12.2505	7.70815e-10	7.02613e-07	12.8569	TGFBR3	7049
235990_at	1.33609	0.183766	12.2457	7.75468e-10	7.0544e-07	12.8509
225534_at	-1.00726	-0.223517	-12.2317	7.8922e-10	7.16518e-07	12.8331	SMIM19	114926
218782_s_at	-1.11302	-0.277362	-12.2288	7.92037e-10	7.17643e-07	12.8295	ATAD2	29028
231964_at	1.23651	0.300476	12.2251	7.95708e-10	7.19535e-07	12.8248	BICD1	636
226374_at	0.805385	0.123269	12.2232	7.97587e-10	7.19804e-07	12.8224	CXADR	1525
206316_s_at	-1.03241	-0.240606	-12.2156	8.05281e-10	7.24175e-07	12.8127	KNTC1	9735
213594_x_at	-1.19093	-0.232566	-12.2137	8.07142e-10	7.24175e-07	12.8103	SRSF10	10772
241816_at	-1.27622	-0.282064	-12.2125	8.08344e-10	7.24175e-07	12.8088	MIS18BP1	55320
236502_at	-1.30052	-0.131717	-12.2121	8.08799e-10	7.24175e-07	12.8083	RNU2-22P
226917_s_at	-0.842068	-0.148935	-12.205	8.16053e-10	7.27827e-07	12.7992	ANAPC4	29945
242837_at	-1.24191	-0.244971	-12.2049	8.16078e-10	7.27827e-07	12.7992
217933_s_at	-1.09225	-0.242675	-12.1969	8.24312e-10	7.33732e-07	12.789	LAP3	51056
201019_s_at	-0.989774	-0.182044	-12.192	8.29474e-10	7.36884e-07	12.7827	EIF1AXP1, EIF1AX	1964
220663_at	1.38933	0.397978	12.1884	8.332e-10	7.38752e-07	12.7782	IL1RAPL1	11141
212686_at	1.26812	0.203971	12.1819	8.40011e-10	7.43342e-07	12.77	PPM1H	57460
228248_at	1.27621	0.314836	12.1622	8.61087e-10	7.60513e-07	12.7449	RICTOR	253260
213253_at	-1.0917	-0.268171	-12.158	8.65632e-10	7.63045e-07	12.7395	SMC2	10592
209231_s_at	-1.39412	-0.284492	-12.1413	8.84012e-10	7.7774e-07	12.7183	DCTN5	84516
201425_at	1.2683	0.266844	12.1367	8.89114e-10	7.80718e-07	12.7125	ALDH2	217
228941_at	-1.93812	-0.432851	-12.1286	8.98171e-10	7.87152e-07	12.7022	ALG10B	144245
243704_at	-1.71571	-0.448764	-12.1209	9.06952e-10	7.93318e-07	12.6923	GPATCH2	55105
220141_at	1.28828	0.309212	12.1063	9.2385e-10	8.06548e-07	12.6737	C11orf63	79864
226625_at	1.57615	0.375747	12.1037	9.26804e-10	8.07578e-07	12.6704	TGFBR3	7049
227349_at	-1.13382	-0.405817	-12.0984	9.33015e-10	8.10002e-07	12.6637	, HELLS	3070
229676_at	-1.02106	-0.188067	-12.0983	9.33149e-10	8.10002e-07	12.6635
213112_s_at	2.79024	0.629646	12.0916	9.41137e-10	8.1395e-07	12.6549	SQSTM1	8878
209123_at	-0.970568	-0.256544	-12.0915	9.41275e-10	8.1395e-07	12.6547	QDPR	5860
235681_at	1.22233	0.161065	12.083	9.51379e-10	8.21125e-07	12.6439
227614_at	1.98348	0.867486	12.0803	9.54652e-10	8.2239e-07	12.6404	HKDC1	80201
202748_at	1.84284	0.0850469	12.0759	9.59984e-10	8.2542e-07	12.6348	GBP2	2634
201362_at	-0.952425	-0.156007	-12.0691	9.68223e-10	8.30685e-07	12.6261	IVNS1ABP	10625
203664_s_at	-0.849836	-0.144532	-12.0679	9.6976e-10	8.30685e-07	12.6245	, POLR2D	5433
1556911_at	-1.53383	-0.30258	-12.0601	9.79305e-10	8.37284e-07	12.6146	ALMS1-IT1
218662_s_at	-1.14493	-0.202421	-12.051	9.90637e-10	8.4386e-07	12.603	NCAPG	64151
239272_at	1.8531	0.469212	12.0503	9.91568e-10	8.4386e-07	12.602	MMP28	79148
200748_s_at	0.93591	0.230889	12.0495	9.92562e-10	8.4386e-07	12.601	FTH1P20, FTH1P2, FTH1P11, FTH1, FTH1P16	2495
212956_at	1.26775	0.264783	12.0393	1.00547e-09	8.53242e-07	12.5879	TBC1D9	23158
241434_at	-1.31007	-0.289766	-12.0285	1.01934e-09	8.63401e-07	12.574
203355_s_at	1.77318	0.31316	12.0172	1.03405e-09	8.7423e-07	12.5595	PSD3	23362
218683_at	-1.14206	-0.236734	-12.0122	1.0406e-09	8.78134e-07	12.5531	PTBP2	58155
237593_at	-1.55261	-0.390613	-12.0041	1.05141e-09	8.85613e-07	12.5427	MNAT1	4331
216525_x_at	-0.81737	-0.205788	-11.9984	1.05895e-09	8.90318e-07	12.5354	PMS2P3	5387
219080_s_at	-1.20037	-0.231689	-11.9938	1.06519e-09	8.93915e-07	12.5295	CTPS2	56474
211267_at	-1.0653	-0.13748	-11.9909	1.06921e-09	8.94921e-07	12.5257	HESX1	8820
230015_at	1.24924	0.295206	11.9892	1.07146e-09	8.94921e-07	12.5235	PRCD	768206
220466_at	-1.13477	-0.24913	-11.9886	1.0723e-09	8.94921e-07	12.5227	CCDC15	80071
218430_s_at	-1.97652	-0.327224	-11.9854	1.07662e-09	8.96325e-07	12.5187	RFX7	64864
213088_s_at	-0.775317	-0.139101	-11.9845	1.07792e-09	8.96325e-07	12.5174	DNAJC9,	23234
220840_s_at	-1.50371	-0.262597	-11.9806	1.08323e-09	8.9841e-07	12.5125	C1orf112	55732
201567_s_at	0.965602	0.208519	11.9798	1.08438e-09	8.9841e-07	12.5114	GOLGA4	2803
212031_at	-0.88835	-0.157396	-11.9757	1.09005e-09	8.99177e-07	12.5061	RBM25	58517
201061_s_at	1.22352	0.170427	11.9753	1.09061e-09	8.99177e-07	12.5056	STOM	2040
239366_at	-1.05328	-0.27673	-11.9748	1.09123e-09	8.99177e-07	12.505
201952_at	0.908021	0.08917	11.9729	1.09397e-09	8.99801e-07	12.5025	ALCAM	214
205301_s_at	-0.971766	-0.235097	-11.9705	1.09729e-09	9.00429e-07	12.4994	OGG1	4968
203785_s_at	-1.41929	-0.248817	-11.9695	1.09869e-09	9.00429e-07	12.4981	DDX28	55794
45633_at	-1.25966	-0.163339	-11.965	1.10496e-09	9.03939e-07	12.4923	GINS3	64785
229434_at	-0.91309	-0.225939	-11.959	1.11345e-09	9.0925e-07	12.4846
209713_s_at	-1.24464	-0.249621	-11.9542	1.12029e-09	9.1319e-07	12.4784	SLC35D1	23169
209624_s_at	-0.948604	-0.219899	-11.9521	1.12332e-09	9.14025e-07	12.4757	MCCC2	64087
201925_s_at	1.25222	0.260355	11.9496	1.12683e-09	9.15242e-07	12.4725	CD55	1604
1557267_s_at	-2.05028	-0.573347	-11.935	1.14801e-09	9.30789e-07	12.4536	GEN1	348654
220346_at	-1.37323	-0.354148	-11.9327	1.15133e-09	9.31816e-07	12.4507	MTHFD2L	441024
235646_at	-1.44508	-0.30475	-11.9229	1.16588e-09	9.41914e-07	12.438
222400_s_at	0.815151	0.169481	11.917	1.17467e-09	9.46103e-07	12.4304	ADI1	55256
224579_at	0.939725	0.178901	11.9167	1.17522e-09	9.46103e-07	12.4299	SLC38A1	81539
236028_at	2.02235	0.359644	11.9143	1.17883e-09	9.47331e-07	12.4268	IBSP	3381
205393_s_at	-1.26469	-0.174772	-11.9047	1.19334e-09	9.57299e-07	12.4144	CHEK1	1111
213940_s_at	-1.037	-0.245378	-11.8999	1.20072e-09	9.61523e-07	12.4081	FNBP1	23048
214455_at	2.33519	0.474765	11.8978	1.20386e-09	9.62249e-07	12.4055	HIST1H2BC	8347
220688_s_at	-1.11358	-0.187681	-11.8954	1.20758e-09	9.62249e-07	12.4024	MRTO4	51154
209520_s_at	-0.909984	-0.145635	-11.8952	1.20797e-09	9.62249e-07	12.402	NCBP1	4686
201202_at	-0.884892	-0.222616	-11.8856	1.22285e-09	9.72394e-07	12.3896	PCNA	5111
206079_at	-1.23321	-0.239153	-11.8832	1.22665e-09	9.73029e-07	12.3865	CHML	1122
227687_at	-1.04006	-0.17491	-11.8824	1.22792e-09	9.73029e-07	12.3854	HYLS1	219844
219490_s_at	-0.919648	-0.158067	-11.8776	1.23541e-09	9.77257e-07	12.3793	DCLRE1B	64858
200884_at	1.48355	0.336616	11.87	1.24755e-09	9.85152e-07	12.3694
1569077_x_at	0.884521	0.201153	11.8613	1.26156e-09	9.94331e-07	12.358	ZNF836	162962
218653_at	-0.932087	-0.175142	-11.8593	1.26472e-09	9.94331e-07	12.3555
243852_at	-0.794226	-0.114748	-11.8587	1.26573e-09	9.94331e-07	12.3547
213647_at	-1.18891	-0.266404	-11.856	1.27005e-09	9.95529e-07	12.3512	DNA2	1763
225276_at	0.870945	0.0988173	11.8551	1.27164e-09	9.95529e-07	12.35	GSPT1	2935
225073_at	-1.00366	-0.197117	-11.8442	1.28949e-09	1.00777e-06	12.3358	PPHLN1	51535
226308_at	-0.796365	-0.157417	-11.837	1.30142e-09	1.01535e-06	12.3265	HAUS8	93323
225993_at	-0.947951	-0.156425	-11.8339	1.30656e-09	1.01595e-06	12.3225	EARS2	124454
205642_at	-1.18625	-0.216121	-11.8339	1.30665e-09	1.01595e-06	12.3224	CNTRL	11064
231047_at	-1.11537	-0.168883	-11.8313	1.31097e-09	1.01757e-06	12.3191
205164_at	-0.964418	-0.233401	-11.826	1.31992e-09	1.02169e-06	12.3122	GCAT	23464
205521_at	-1.2462	-0.231896	-11.8255	1.32078e-09	1.02169e-06	12.3115	EXOG	9941
213449_at	-1.70628	-0.366074	-11.8219	1.32698e-09	1.02474e-06	12.3068	POP1	10940
1562020_s_at	2.00119	0.492451	11.8131	1.3421e-09	1.03467e-06	12.2953	NT5DC4	284958
221952_x_at	-0.971053	-0.186613	-11.8036	1.35846e-09	1.04383e-06	12.283	HMGN2P41, TRMT5, HMGN2P3,	57570
238829_at	-1.15729	-0.221739	-11.8036	1.35858e-09	1.04383e-06	12.2829	EIF3J	8669
242453_at	-1.54528	-0.359069	-11.7866	1.38869e-09	1.06439e-06	12.2607
210512_s_at	1.48877	0.387986	11.7858	1.39002e-09	1.06439e-06	12.2597	VEGFA	7422
209714_s_at	-1.00808	-0.284547	-11.7819	1.39698e-09	1.06792e-06	12.2547	CDKN3	1033
224200_s_at	-1.49801	-0.284621	-11.7798	1.40076e-09	1.06901e-06	12.2519	RAD18	56852
227633_at	0.981108	0.226623	11.7647	1.42839e-09	1.08827e-06	12.2321	RHEB	6009
216237_s_at	-1.60641	-0.424734	-11.7628	1.43192e-09	1.08914e-06	12.2296	MCM5	4174
218882_s_at	-0.814318	-0.229365	-11.7592	1.43851e-09	1.09129e-06	12.225	WDR3	10885
204546_at	1.27169	0.165684	11.7585	1.43979e-09	1.09129e-06	12.2241	KIAA0513	9764
238501_at	-1.07041	-0.220295	-11.7574	1.44194e-09	1.09129e-06	12.2225
223154_at	-1.16388	-0.259674	-11.755	1.44633e-09	1.0928e-06	12.2195	MRPL1	65008
209162_s_at	-1.1976	-0.18773	-11.7464	1.46262e-09	1.10327e-06	12.2081	PRPF4	9128
228092_at	-1.20025	-0.224958	-11.7444	1.46629e-09	1.10421e-06	12.2056	CREM	1390
235667_at	-1.51173	-0.276447	-11.737	1.4804e-09	1.11298e-06	12.1959	USP46-AS1
1555841_at	0.787676	0.280274	11.7299	1.49404e-09	1.12139e-06	12.1865	MSANTD3	91283
222802_at	-1.77503	-0.417168	-11.7243	1.50503e-09	1.12778e-06	12.1791	EDN1	1906
214144_at	-1.04156	-0.216807	-11.7203	1.51268e-09	1.13164e-06	12.174	, POLR2D	5433
207113_s_at	1.64419	0.224296	11.7164	1.52044e-09	1.13558e-06	12.1688	TNF	7124
235634_at	1.28176	0.171379	11.7129	1.52733e-09	1.13704e-06	12.1642	PURG	29942
1552680_a_at	-1.42985	-0.297903	-11.7129	1.52739e-09	1.13704e-06	12.1642	CASC5	57082
244260_at	1.76026	0.327238	11.7111	1.53082e-09	1.13773e-06	12.1619
209421_at	-1.12087	-0.2497	-11.7085	1.53597e-09	1.1397e-06	12.1585	MSH2	4436
1554266_at	-1.09832	-0.229709	-11.7071	1.5389e-09	1.14001e-06	12.1565
229671_s_at	-1.14454	-0.176407	-11.7039	1.54521e-09	1.14282e-06	12.1524
214469_at	1.94397	0.375394	11.694	1.56512e-09	1.15567e-06	12.1394	HIST1H2AE	3012
212174_at	-1.35742	-0.250699	-11.6897	1.57385e-09	1.16023e-06	12.1338	AK2	204
229980_s_at	-0.789772	-0.208807	-11.6877	1.57801e-09	1.16142e-06	12.1311	, SNX5	27131
243918_at	1.63345	0.348434	11.6812	1.59147e-09	1.16943e-06	12.1225	KLHL24	54800
239302_s_at	-1.83663	-0.511392	-11.6768	1.60042e-09	1.17382e-06	12.1168
239086_at	-1.56293	-0.355441	-11.6744	1.60553e-09	1.17382e-06	12.1136
208506_at	-1.47711	-0.338245	-11.6731	1.60828e-09	1.17382e-06	12.1118	HIST1H3F	8968
236721_at	1.03788	0.225747	11.6714	1.61172e-09	1.17382e-06	12.1096	ALKBH1	8846
217815_at	-0.76994	-0.159982	-11.6713	1.61203e-09	1.17382e-06	12.1095	SUPT16H, SUPT16HP1	11198
1555920_at	-1.39593	-0.355907	-11.6708	1.61293e-09	1.17382e-06	12.1089	CBX3	11335
219790_s_at	0.985731	0.166306	11.6686	1.61769e-09	1.1754e-06	12.1059	NPR3	4883
223520_s_at	-1.73899	-0.345512	-11.6623	1.63083e-09	1.18307e-06	12.0977	KIF13A	63971
229871_at	-1.47729	-0.385367	-11.6601	1.63549e-09	1.18456e-06	12.0948	SAMD4B	55095
1554287_at	-1.10709	-0.319926	-11.6559	1.64447e-09	1.18917e-06	12.0892	TRIM4	89122
219990_at	-1.59263	-0.444707	-11.6512	1.65453e-09	1.19454e-06	12.0831	E2F8	79733
230927_at	-1.97157	-0.446948	-11.6491	1.65914e-09	1.19597e-06	12.0802
204039_at	1.05425	0.124169	11.6443	1.66954e-09	1.20156e-06	12.0739	CEBPA	1050
205139_s_at	1.30894	0.147142	11.6389	1.68125e-09	1.20808e-06	12.0668	UST	10090
232193_at	-1.0472	-0.205848	-11.6357	1.68839e-09	1.2113e-06	12.0625
220155_s_at	-0.856964	-0.170926	-11.6307	1.69924e-09	1.21544e-06	12.056	BRD9	65980
221679_s_at	1.16235	0.291991	11.6306	1.69952e-09	1.21544e-06	12.0558	ABHD6	57406
203720_s_at	0.802356	0.169952	11.6194	1.72465e-09	1.23148e-06	12.0409	ERCC1	2067
205141_at	1.37934	0.346208	11.6126	1.73982e-09	1.24037e-06	12.0321	ANG	283
206675_s_at	1.41573	0.343041	11.6106	1.74445e-09	1.24099e-06	12.0294	SKIL	6498
231990_at	-1.6027	-0.314012	-11.6095	1.747e-09	1.24099e-06	12.0279	USP15	9958, 102465133
200893_at	-1.09392	-0.208642	-11.6087	1.74888e-09	1.24099e-06	12.0268	TRA2B	6434
226119_at	1.08133	0.21962	11.6015	1.76536e-09	1.25048e-06	12.0173	PCMTD1	115294
224447_s_at	1.10217	0.209365	11.6004	1.76774e-09	1.25048e-06	12.0159	MIEN1	84299
229933_at	-1.19441	-0.2582	-11.5983	1.77274e-09	1.25206e-06	12.013	C1orf74	148304
229969_at	-1.63843	-0.341607	-11.5942	1.78216e-09	1.25676e-06	12.0077	SEC63	11231
228536_at	-0.88362	-0.175394	-11.5913	1.78903e-09	1.25923e-06	12.0038	PRMT9	90826
209264_s_at	-1.06725	-0.169218	-11.5903	1.79125e-09	1.25923e-06	12.0025	TSPAN4	7106
222335_at	-1.57192	-0.282644	-11.5884	1.79565e-09	1.25923e-06	12	TGS1	96764
212565_at	1.16311	0.170616	11.588	1.79674e-09	1.25923e-06	11.9994	STK38L	23012
218069_at	-0.766153	-0.21645	-11.5838	1.80645e-09	1.26409e-06	11.9939	DCTPP1	79077
1554018_at	2.90563	0.620915	11.58	1.81554e-09	1.2685e-06	11.9888	GPNMB	10457
205134_s_at	-0.86181	-0.165939	-11.5727	1.83294e-09	1.27869e-06	11.9791	NUFIP1, NUFIP1P	26747
50965_at	1.88234	0.242941	11.5694	1.84093e-09	1.2823e-06	11.9747	RAB26	25837
40837_at	1.10606	0.189098	11.5659	1.84939e-09	1.28622e-06	11.9701	TLE2	7089
221760_at	1.36687	0.270873	11.5629	1.85656e-09	1.28925e-06	11.9661	MAN1A1	4121
1558021_at	-1.75571	-0.35421	-11.5606	1.86218e-09	1.29117e-06	11.9631	RABEPK	10244
209323_at	-1.0461	-0.170311	-11.5586	1.86716e-09	1.29265e-06	11.9604	THAP12	5612
1565975_at	-1.11372	-0.427432	-11.5531	1.88043e-09	1.29986e-06	11.9532
218827_s_at	-1.10892	-0.179651	-11.5514	1.88464e-09	1.3008e-06	11.9509	CEP192	55125
209572_s_at	-0.989868	-0.152334	-11.55	1.88824e-09	1.30131e-06	11.949	EED	8726, 102465452
232489_at	-2.06075	-0.420874	-11.5445	1.9018e-09	1.30459e-06	11.9417	TRMT13	54482
1559322_at	2.09129	0.305496	11.5443	1.90237e-09	1.30459e-06	11.9414
233156_at	-1.47383	-0.347764	-11.5441	1.90283e-09	1.30459e-06	11.9412
219459_at	-1.45927	-0.303741	-11.5424	1.90717e-09	1.30459e-06	11.9388	POLR3B	55703
202691_at	-1.15916	-0.288995	-11.5423	1.90734e-09	1.30459e-06	11.9388	SNRPD1	6632
218656_s_at	-1.09436	-0.290724	-11.539	1.91549e-09	1.30819e-06	11.9344	LHFP	10186
1570153_at	-1.02259	-0.329523	-11.5345	1.9269e-09	1.31402e-06	11.9284	CCDC169	728591
206653_at	-1.08343	-0.23508	-11.5307	1.93645e-09	1.31855e-06	11.9234	POLR3G	10622
226319_s_at	-0.954917	-0.208668	-11.5219	1.95907e-09	1.33003e-06	11.9116	ALYREF	10189
224989_at	1.64025	0.2948	11.5219	1.95915e-09	1.33003e-06	11.9116	SMIM14	201895
218839_at	2.43936	0.476695	11.5152	1.97632e-09	1.33968e-06	11.9027	HEY1	23462
213296_at	1.10168	0.293643	11.5068	1.99831e-09	1.35123e-06	11.8915	RER1	11079
227595_at	-1.48338	-0.238121	-11.5064	1.9993e-09	1.35123e-06	11.891	ZMYM6	9204
241885_at	-1.34675	-0.356211	-11.5048	2.00355e-09	1.3521e-06	11.8888
1554053_at	-1.67748	-0.327636	-11.5005	2.01477e-09	1.35674e-06	11.8831	SPTLC1	10558
1560738_at	-2.22696	-0.458839	-11.4999	2.0164e-09	1.35674e-06	11.8823
209485_s_at	0.94521	0.131069	11.4911	2.03997e-09	1.36887e-06	11.8705	OSBPL1A	114876
228479_at	0.916277	0.179527	11.4909	2.04045e-09	1.36887e-06	11.8703	SOAT1	6646
235786_at	-1.1441	-0.282863	-11.4881	2.04794e-09	1.37188e-06	11.8666
206205_at	-0.934016	-0.219669	-11.479	2.07261e-09	1.38636e-06	11.8544	MPHOSPH9	10198
201106_at	1.14379	0.0536379	11.471	2.09459e-09	1.39901e-06	11.8437	GPX4	2879
228080_at	1.44993	0.335958	11.4655	2.1097e-09	1.40703e-06	11.8364	LAYN	143903
1552546_a_at	-1.98011	-0.0504068	-11.4604	2.12397e-09	1.41447e-06	11.8295	LETM2	137994
1553400_a_at	1.30118	0.174482	11.4583	2.12996e-09	1.41639e-06	11.8267	CRHR1-IT1	147081, 401884
206336_at	1.26016	0.179677	11.4503	2.15246e-09	1.42926e-06	11.816	CXCL6	6372
238311_at	-1.33986	-0.14247	-11.4447	2.16831e-09	1.43737e-06	11.8086
208896_at	-0.850447	-0.124117	-11.4438	2.171e-09	1.43737e-06	11.8073	DDX18	8886
222608_s_at	-1.02862	-0.17669	-11.4402	2.18125e-09	1.44026e-06	11.8025	ANLN	54443
57516_at	-1.60626	-0.352186	-11.4401	2.1817e-09	1.44026e-06	11.8023	ZNF764	92595
229899_s_at	-1.61287	-0.342688	-11.4387	2.18565e-09	1.44078e-06	11.8005
209853_s_at	-1.01968	-0.23277	-11.4362	2.19272e-09	1.44335e-06	11.7972	PSME3	10197
214113_s_at	-1.02174	-0.19925	-11.4312	2.20744e-09	1.45094e-06	11.7904	RBM8A	9939
225509_at	1.21451	0.188639	11.43	2.21078e-09	1.45104e-06	11.7889	SAP30L	79685
200904_at	1.35336	0.333114	11.4269	2.22008e-09	1.45504e-06	11.7846	HLA-E	3133
239393_at	-1.37093	-0.24797	-11.4221	2.2341e-09	1.46213e-06	11.7782
212227_x_at	0.953178	0.206863	11.418	2.24625e-09	1.46796e-06	11.7727	EIF1	10209
215190_at	-1.08968	-0.235413	-11.4055	2.28372e-09	1.49031e-06	11.7559	EIF3M	10480
230361_at	-1.38362	-0.0433428	-11.4029	2.29163e-09	1.49333e-06	11.7524	MROH1	727957
209849_s_at	-0.871723	-0.241398	-11.3962	2.31177e-09	1.5022e-06	11.7435	RAD51C	5889
235747_at	-1.47426	-0.311293	-11.3962	2.31185e-09	1.5022e-06	11.7435	SLC25A16	8034
225083_at	-1.07142	-0.17517	-11.3923	2.32394e-09	1.50791e-06	11.7382	, GTF3C6	112495
1552946_at	2.59395	0.697322	11.3894	2.33287e-09	1.51154e-06	11.7343	ZNF114	163071
210687_at	1.09362	0.211204	11.3873	2.33928e-09	1.51354e-06	11.7315	CPT1A	1374
1554251_at	-1.45618	-0.354213	-11.3835	2.35121e-09	1.51695e-06	11.7263
219352_at	-1.05589	-0.243549	-11.3835	2.35123e-09	1.51695e-06	11.7263	HERC6	55008
227748_at	-1.01656	-0.217904	-11.3784	2.36703e-09	1.52498e-06	11.7195	RBMXL1	494115
205462_s_at	1.66895	0.432472	11.3651	2.40897e-09	1.54981e-06	11.7017	HPCAL1	3241
201631_s_at	1.28565	0.345236	11.3638	2.41338e-09	1.55029e-06	11.6998	IER3	8870
209275_s_at	0.973592	0.291962	11.3628	2.41653e-09	1.55029e-06	11.6985	, CLN3	1201
216212_s_at	-0.783523	-0.172874	-11.3597	2.42653e-09	1.55451e-06	11.6943	DKC1	1736, 100847052
218374_s_at	-1.60855	-0.318888	-11.3448	2.47474e-09	1.58262e-06	11.6743	C12orf4	57102
213916_at	-1.49611	-0.216119	-11.3441	2.47736e-09	1.58262e-06	11.6732	ZNF625-ZNF20, ZNF20	7568
213183_s_at	2.48721	0.556086	11.339	2.49412e-09	1.59109e-06	11.6664
222362_at	1.21277	0.204051	11.3374	2.49938e-09	1.59221e-06	11.6642	AGFG2	3268
228450_at	1.50386	0.229817	11.3357	2.50508e-09	1.59361e-06	11.6619	PLEKHA7	144100
205339_at	-1.01934	-0.15349	-11.3343	2.50978e-09	1.59437e-06	11.66	STIL	6491
230720_at	1.1039	0.155147	11.327	2.53424e-09	1.60766e-06	11.6502	RNF182	221687
207222_at	0.997781	0.192529	11.3231	2.54733e-09	1.61372e-06	11.6449	PLA2G10	8399
216958_s_at	-0.961636	-0.233994	-11.317	2.56811e-09	1.62462e-06	11.6367	IVD	3712
202585_s_at	-1.11704	-0.201212	-11.3049	2.60975e-09	1.64867e-06	11.6203	NFX1	4799
219562_at	2.26318	0.30695	11.3003	2.62596e-09	1.6566e-06	11.6141	RAB26	25837
238824_at	1.0949	0.297346	11.2926	2.65273e-09	1.66912e-06	11.6037	RPS29	6235
205733_at	-1.18863	-0.233853	-11.2925	2.65314e-09	1.66912e-06	11.6036	BLM	641
208117_s_at	-0.805507	-0.135343	-11.2913	2.65762e-09	1.66963e-06	11.6019	LAS1L	81887
222578_s_at	-0.926816	-0.166396	-11.2635	2.75791e-09	1.73025e-06	11.5642	UBA5	79876
204521_at	-1.25045	-0.280468	-11.257	2.78198e-09	1.74294e-06	11.5554	FAM216A	29902
221985_at	2.66195	0.544421	11.2552	2.7888e-09	1.74481e-06	11.5529	KLHL24	54800
213574_s_at	1.32135	0.24718	11.2509	2.80487e-09	1.75246e-06	11.5471	KPNB1	3837
1554711_at	1.2444	0.245611	11.2405	2.84381e-09	1.77435e-06	11.5331	CALHM3	119395
1563796_s_at	-1.16907	-0.257239	-11.2371	2.85697e-09	1.77838e-06	11.5284	EARS2	124454
213983_s_at	-0.863968	-0.205843	-11.2368	2.85809e-09	1.77838e-06	11.528	PDS5A	23244
209653_at	-0.79062	-0.112504	-11.2316	2.87785e-09	1.78823e-06	11.521	, KPNA4	3840
221219_s_at	-1.23631	-0.302888	-11.226	2.89962e-09	1.79696e-06	11.5133	KLHDC4	54758, 105371397
242639_at	-1.42523	-0.43622	-11.226	2.89979e-09	1.79696e-06	11.5132	ICE2	79664
211999_at	-0.687628	-0.130926	-11.2246	2.90509e-09	1.79779e-06	11.5114	H3F3B	3021, 100616282
209805_at	-0.955575	-0.154343	-11.2207	2.92014e-09	1.80405e-06	11.5061	PMS2, PMS2CL	5395
230399_at	-0.982507	-0.290235	-11.22	2.92314e-09	1.80405e-06	11.5051
228466_at	-1.28257	-0.170918	-11.2159	2.93917e-09	1.8109e-06	11.4995	GABPB2	126626
227252_at	1.86754	0.414772	11.2151	2.94219e-09	1.8109e-06	11.4985	LRP10	26020
213049_at	0.880768	0.1036	11.2106	2.96005e-09	1.81943e-06	11.4923	RALGAPA1	253959
226535_at	1.64547	0.362243	11.2075	2.97246e-09	1.82459e-06	11.4881	ITGB6	3694, 100505984
226890_at	-0.935381	-0.148113	-11.2032	2.98954e-09	1.8326e-06	11.4823	WDR35	57539
205996_s_at	-1.33976	-0.25374	-11.2001	3.00214e-09	1.83785e-06	11.478	AK2	204
1569144_a_at	1.00293	0.160845	11.1952	3.02171e-09	1.84137e-06	11.4714	CYSRT1	375791
1556126_s_at	-1.18714	-0.190504	-11.1952	3.02179e-09	1.84137e-06	11.4714	GPATCH2	55105
204709_s_at	-1.31818	-0.230274	-11.1949	3.02312e-09	1.84137e-06	11.4709	KIF23	9493
215667_x_at	-1.08568	-0.202777	-11.1947	3.0241e-09	1.84137e-06	11.4706
229829_at	-0.989812	-0.163295	-11.1924	3.03343e-09	1.84459e-06	11.4675	LINC00526
205569_at	0.831301	-0.0963871	11.1891	3.04669e-09	1.85018e-06	11.463	LAMP3	27074
1554740_a_at	-1.48695	-0.276976	-11.1879	3.05153e-09	1.85064e-06	11.4614	IPP	3652
238982_at	-1.27349	-0.303943	-11.1856	3.06119e-09	1.85403e-06	11.4582	DENR	8562
200874_s_at	-1.31105	-0.279186	-11.17	3.12583e-09	1.89067e-06	11.437	SNORA51, NOP56	677831, 10528, 100302138
204472_at	2.18573	0.745587	11.164	3.15119e-09	1.90347e-06	11.4287	GEM	2669
204126_s_at	-1.09334	-0.315094	-11.1561	3.18497e-09	1.92133e-06	11.4179	CDC45	8318
1554594_at	-1.82983	-0.301675	-11.1549	3.18992e-09	1.92176e-06	11.4163	ARHGAP27	201176
211458_s_at	1.01909	0.24838	11.1505	3.20889e-09	1.93063e-06	11.4103	GABARAPL1	23710
238813_at	1.07691	0.244652	11.1467	3.22539e-09	1.9361e-06	11.4051	APEX2	27301
220526_s_at	-1.06439	-0.246186	-11.1465	3.22649e-09	1.9361e-06	11.4047	MRPL20	55052
1556212_x_at	-1.25297	-0.3762	-11.1404	3.25275e-09	1.94928e-06	11.3965
232083_at	-1.15252	-0.114411	-11.1384	3.2618e-09	1.95214e-06	11.3937	KIF16B	55614
223221_at	-1.00739	-0.20885	-11.134	3.28099e-09	1.96104e-06	11.3877	SCO1	6341
1559382_at	-1.45445	-0.277166	-11.1304	3.29684e-09	1.96793e-06	11.3828	SMIM7	79086
212980_at	-1.44424	-0.432687	-11.1272	3.31115e-09	1.97388e-06	11.3784	AHSA2	130872
236462_at	-1.55395	-0.368511	-11.1235	3.32797e-09	1.98131e-06	11.3732
211686_s_at	-0.71065	-0.161756	-11.1132	3.37448e-09	2.00637e-06	11.3591	MAK16	84549
208956_x_at	-1.07494	-0.30039	-11.1116	3.38152e-09	2.00793e-06	11.357	DUT	1854
203917_at	0.875996	0.168302	11.1105	3.38674e-09	2.00841e-06	11.3554	CXADR	1525
231950_at	-2.12395	-0.45769	-11.1081	3.39763e-09	2.01225e-06	11.3522	ZNF658, ZNF658B	26149
243963_at	-1.56199	-0.307166	-11.1049	3.41261e-09	2.01849e-06	11.3477
1552947_x_at	2.26172	0.645557	11.0949	3.459e-09	2.04327e-06	11.334	ZNF114	163071
227157_at	-0.951859	-0.104979	-11.0904	3.47984e-09	2.05161e-06	11.3279	PRIMPOL	201973
223482_at	0.767589	0.22826	11.0899	3.48214e-09	2.05161e-06	11.3272	TMEM120A	83862
1562102_at	2.94182	1.18412	11.0878	3.49211e-09	2.05483e-06	11.3243
202533_s_at	-2.05055	-0.521016	-11.0864	3.49864e-09	2.05601e-06	11.3224	DHFR, DHFRP1	1719
202150_s_at	1.12941	0.291332	11.085	3.50522e-09	2.05722e-06	11.3205	NEDD9	4739
1558292_s_at	-1.33813	-0.20902	-11.0812	3.52351e-09	2.06529e-06	11.3152	PIGW	284098
223058_at	1.52093	0.240617	11.0772	3.54266e-09	2.06923e-06	11.3097	FAM107B	83641
200871_s_at	0.876413	0.168039	11.0771	3.54288e-09	2.06923e-06	11.3096	PSAP	5660
228824_s_at	0.89477	0.275921	11.0767	3.54485e-09	2.06923e-06	11.309	, PTGR1	22949
206453_s_at	1.03123	0.271055	11.076	3.54843e-09	2.06923e-06	11.308	NDRG2	57447, 102465428
208926_at	1.48678	0.369899	11.07	3.57716e-09	2.08331e-06	11.2998	NEU1	4758
219649_at	-1.15498	-0.198945	-11.0662	3.59577e-09	2.09147e-06	11.2945	ALG6	29929
230026_at	-1.12721	-0.300029	-11.0613	3.61977e-09	2.10274e-06	11.2878	MRPL43	84545
242424_at	-1.26893	-0.28314	-11.0585	3.63328e-09	2.10537e-06	11.284
211363_s_at	-0.7878	-0.235584	-11.0585	3.63356e-09	2.10537e-06	11.2839	, MTAP	4507
200790_at	-1.68256	-0.106126	-11.0502	3.67438e-09	2.12632e-06	11.2725	ODC1	4953
239768_x_at	-1.49137	-0.285589	-11.0475	3.688e-09	2.13149e-06	11.2688	GPATCH2	55105
226354_at	0.842437	0.255797	11.0404	3.72362e-09	2.14934e-06	11.259	LACTB	114294
200789_at	1.00054	0.150069	11.037	3.74073e-09	2.15648e-06	11.2543
214071_at	1.55106	0.241193	11.0353	3.7497e-09	2.15724e-06	11.2519	GNAL	2774
204735_at	2.11008	0.422859	11.0341	3.75536e-09	2.15724e-06	11.2504	PDE4A	5141
208990_s_at	-0.946299	-0.194033	-11.034	3.75628e-09	2.15724e-06	11.2501	HNRNPH3	3189
231930_at	1.38965	0.235913	11.0315	3.76905e-09	2.16185e-06	11.2467	ELMOD1	55531, 643923
230060_at	-1.78082	-0.434678	-11.0231	3.81232e-09	2.18391e-06	11.2351	CDCA7	83879
215919_s_at	-0.911811	-0.140771	-11.0159	3.84943e-09	2.2024e-06	11.2252	MRPS11	64963
203383_s_at	-0.847111	-0.183166	-11.0131	3.86406e-09	2.20799e-06	11.2213	GOLGA1	2800
228601_at	1.20816	0.297747	11.011	3.87505e-09	2.21149e-06	11.2185	HAGLR	401022
223185_s_at	1.87677	0.355817	11.0068	3.89718e-09	2.22134e-06	11.2127	BHLHE41	79365
222429_at	-0.914047	-0.175874	-11.0041	3.91194e-09	2.22696e-06	11.2088	DBNL	28988, 102466985
221988_at	0.985626	0.170064	10.996	3.95503e-09	2.24867e-06	11.1977	SMIM7	79086
204579_at	1.7692	0.279794	10.9919	3.97735e-09	2.25854e-06	11.192	FGFR4	2264
204127_at	-1.22141	-0.272659	-10.9905	3.98478e-09	2.25876e-06	11.1901	RFC3	5983
48825_at	0.825195	0.214755	10.99	3.98766e-09	2.25876e-06	11.1893	ING4	51147
200798_x_at	-0.979917	-0.143239	-10.988	3.99817e-09	2.26189e-06	11.1866	MCL1	4170
207714_s_at	-0.913453	-0.13566	-10.9867	4.00529e-09	2.2631e-06	11.1848	SERPINH1	871
203524_s_at	0.867404	0.186846	10.9812	4.03575e-09	2.27749e-06	11.1771	MPST	4357
203775_at	-1.15568	-0.21051	-10.9802	4.0411e-09	2.27768e-06	11.1758	SLC25A13	10165
210111_s_at	0.940651	0.155413	10.9778	4.05423e-09	2.28168e-06	11.1725	KLHDC10	23008
45714_at	1.8434	0.184558	10.9771	4.05823e-09	2.28168e-06	11.1715	HCFC1R1	54985
224188_s_at	-0.778956	-0.189607	-10.9757	4.06572e-09	2.28307e-06	11.1696	XPNPEP3	63929
231730_at	-1.14522	-0.189208	-10.9722	4.0852e-09	2.28847e-06	11.1647	SEPSECS	51091
1557985_s_at	-1.1564	-0.225031	-10.972	4.0865e-09	2.28847e-06	11.1644	CEP78	84131
236969_at	-1.06721	-0.237398	-10.9713	4.09043e-09	2.28847e-06	11.1634
1553861_at	1.74429	0.445828	10.9666	4.11689e-09	2.30045e-06	11.1569	TCP11L2	255394
218429_s_at	1.11576	0.148349	10.9564	4.17435e-09	2.328e-06	11.1428	C19orf66	55337
209457_at	1.7027	0.490468	10.956	4.17644e-09	2.328e-06	11.1423	DUSP5	1847
219634_at	1.20064	0.203161	10.9515	4.20229e-09	2.33954e-06	11.136	CHST11	50515
242138_at	-1.11964	-0.257092	-10.9486	4.21895e-09	2.34594e-06	11.132	DLX1	1745
219587_at	-1.35601	-0.288161	-10.9469	4.22882e-09	2.34856e-06	11.1296	TTC12	54970
35156_at	-0.739239	-0.200362	-10.9422	4.25599e-09	2.36077e-06	11.1231	R3HCC1	203069
222734_at	-1.17363	-0.264368	-10.9408	4.26406e-09	2.36236e-06	11.1211	WARS2	10352
212281_s_at	-0.689067	-0.172996	-10.9379	4.28089e-09	2.3688e-06	11.1171	TMEM97	27346
202021_x_at	0.986587	0.191166	10.9357	4.29404e-09	2.37093e-06	11.114	EIF1	10209
223180_s_at	-0.859247	-0.132562	-10.9355	4.29517e-09	2.37093e-06	11.1137	TIMM21	29090
37793_r_at	-1.09125	-0.196578	-10.9333	4.30825e-09	2.3751e-06	11.1106	RAD51D	5892
226868_at	-0.98765	-0.159476	-10.9324	4.31316e-09	2.3751e-06	11.1095	GXYLT1	283464
223308_s_at	-0.976311	-0.219209	-10.9304	4.32499e-09	2.37874e-06	11.1067	WDR5	11091
210213_s_at	-0.89174	-0.147911	-10.9239	4.36394e-09	2.39726e-06	11.0976	EIF6,	3692
226271_at	-1.26847	-0.277282	-10.9228	4.37046e-09	2.39794e-06	11.0961	GDAP1	54332
218198_at	0.830469	0.209991	10.9184	4.39674e-09	2.40814e-06	11.09	DHX32	55760
212230_at	1.68069	0.433898	10.9179	4.39962e-09	2.40814e-06	11.0893	PLPP3	8613
212928_at	-1.35869	-0.209337	-10.9164	4.40907e-09	2.41041e-06	11.0871	TSPYL4	23270
236278_at	1.33621	0.342542	10.9142	4.42183e-09	2.41448e-06	11.0842	HIST1H3E	8353
201016_at	-1.14471	-0.244888	-10.9128	4.43076e-09	2.41646e-06	11.0821	EIF1AXP1, EIF1AX	1964
202108_at	0.83956	0.159776	10.9099	4.44812e-09	2.42302e-06	11.0781	PEPD	5184
227526_at	1.40099	0.12738	10.9089	4.45453e-09	2.42361e-06	11.0767	CDON	50937
233496_s_at	-1.25352	-0.225891	-10.9025	4.4936e-09	2.44194e-06	11.0678	CFL2	1073
229417_at	0.902031	0.142672	10.8938	4.54759e-09	2.46834e-06	11.0556	STAU2	27067
204146_at	-1.1232	-0.237721	-10.8913	4.56312e-09	2.47381e-06	11.0522	RAD51AP1	10635
53720_at	1.34202	0.240972	10.8874	4.58743e-09	2.48403e-06	11.0468	C19orf66	55337
232013_at	-1.42575	-0.294935	-10.8861	4.59556e-09	2.48547e-06	11.0449	ERCC6L2	375748
223452_s_at	-1.00091	-0.115575	-10.8836	4.61145e-09	2.49111e-06	11.0414	ATL3	25923
1554768_a_at	-1.14589	-0.197333	-10.8814	4.62522e-09	2.49558e-06	11.0384	MAD2L1,	4085
201060_x_at	1.04745	0.193637	10.8777	4.64908e-09	2.50548e-06	11.0332	STOM	2040
211017_s_at	-1.19324	-0.228911	-10.8651	4.72984e-09	2.54599e-06	11.0156	NF2	4771
223035_s_at	-0.921808	-0.165708	-10.8628	4.74517e-09	2.55122e-06	11.0123	FARSB	10056
232810_at	-1.6132	-0.351407	-10.8567	4.78449e-09	2.56932e-06	11.0039	AIG1	51390
205441_at	1.2144	0.225808	10.8516	4.81827e-09	2.58441e-06	10.9968	OCEL1	79629
217356_s_at	-0.823992	-0.0745215	-10.8498	4.83047e-09	2.5879e-06	10.9942	PGK1	5230
202341_s_at	0.933067	0.235555	10.8414	4.88655e-09	2.61487e-06	10.9825	TRIM2	23321
202706_s_at	-1.14733	-0.195736	-10.8385	4.90613e-09	2.62227e-06	10.9784	UMPS	7372
1563629_a_at	0.821716	0.156132	10.8348	4.93129e-09	2.63262e-06	10.9732
231810_at	-1.13371	-0.303209	-10.8148	5.06842e-09	2.70083e-06	10.9453	BRI3BP	140707
212311_at	1.07509	0.334557	10.8145	5.07094e-09	2.70083e-06	10.9448	SEL1L3	23231
222976_s_at	-0.695213	-0.0953641	-10.8034	5.14934e-09	2.73938e-06	10.9291	TPM3P8, TPM3	7170
211376_s_at	-1.01072	-0.220117	-10.7955	5.20531e-09	2.76592e-06	10.9181	NSMCE4A	54780
212130_x_at	0.96581	0.189907	10.7939	5.21707e-09	2.7676e-06	10.9158	EIF1	10209
232366_at	-1.41928	-0.229698	-10.7934	5.22065e-09	2.7676e-06	10.9151	KIAA0232	9778
202396_at	-0.86365	-0.170334	-10.7907	5.24007e-09	2.77467e-06	10.9114	TCERG1,	10915
200987_x_at	-0.964451	-0.232512	-10.7879	5.26025e-09	2.77922e-06	10.9074	PSME3	10197
204633_s_at	0.761631	0.107971	10.7877	5.26189e-09	2.77922e-06	10.9071	RPS6KA5	9252
212729_at	-0.862227	-0.244165	-10.7866	5.26976e-09	2.77922e-06	10.9056	DLG3	1741
213017_at	0.842031	0.25302	10.7861	5.27312e-09	2.77922e-06	10.905	ABHD3	171586
202489_s_at	1.34821	0.157902	10.7838	5.29006e-09	2.78492e-06	10.9017	FXYD3	5349, 102466205
235158_at	-1.08118	-0.161197	-10.7828	5.29725e-09	2.78549e-06	10.9003	TMEM209	84928
203747_at	1.3394	0.297956	10.78	5.31783e-09	2.79308e-06	10.8964	AQP3	360
218319_at	0.917568	0.240162	10.7785	5.3288e-09	2.7954e-06	10.8943	PELI1	57162
200998_s_at	0.81544	0.125308	10.7778	5.33454e-09	2.7954e-06	10.8932	CKAP4	10970
236565_s_at	0.98206	0.15135	10.7701	5.39105e-09	2.82176e-06	10.8824	LARP6	55323
222417_s_at	-0.934454	-0.266529	-10.7653	5.42702e-09	2.83732e-06	10.8757	SNX5	27131
208158_s_at	0.921451	0.105549	10.7609	5.46055e-09	2.85158e-06	10.8694	, OSBPL1A	114876
203042_at	1.23469	0.272758	10.7588	5.47638e-09	2.85518e-06	10.8664	LAMP2	3920
217775_s_at	0.951888	0.220461	10.7583	5.48001e-09	2.85518e-06	10.8658	RDH11	51109
238977_at	-2.14853	-0.562109	-10.7522	5.52647e-09	2.87449e-06	10.8572	MCM6	4175
209804_at	-0.972328	-0.181773	-10.7518	5.52971e-09	2.87449e-06	10.8566	DCLRE1A	9937
213133_s_at	-0.999559	-0.227067	-10.7476	5.56172e-09	2.88602e-06	10.8507	GCSHP5, GCSH	2653
212419_at	1.55715	0.249403	10.7472	5.56458e-09	2.88602e-06	10.8502	ZCCHC24	219654
202309_at	-0.775188	-0.20275	-10.746	5.57411e-09	2.88767e-06	10.8484	MTHFD1	4522
1553229_at	-1.3767	-0.331661	-10.7402	5.61888e-09	2.90755e-06	10.8403	ZNF572	137209
211527_x_at	1.82909	0.425929	10.7271	5.72195e-09	2.95752e-06	10.8218	VEGFA	7422
241838_at	-1.545	-0.347568	-10.7212	5.76927e-09	2.9786e-06	10.8134	MIR3939	100500857
221951_at	0.85832	0.202794	10.7195	5.78252e-09	2.98205e-06	10.8111	TMEM80	283232
214651_s_at	-2.0125	-0.365405	-10.7126	5.8381e-09	3.0073e-06	10.8013	, HOXA9	3205, 442920
207917_at	-0.895265	-0.172262	-10.7057	5.89431e-09	3.03282e-06	10.7916
209507_at	-0.869958	-0.215014	-10.6988	5.95067e-09	3.05837e-06	10.7819	RPA3	6119
64942_at	0.846849	0.147147	10.6955	5.9788e-09	3.06936e-06	10.7771	GPR153	387509
223486_at	-1.08311	-0.177805	-10.6913	6.01359e-09	3.08374e-06	10.7712	GTPBP8	29083
214700_x_at	-0.907804	-0.20413	-10.687	6.04921e-09	3.09658e-06	10.7651	RIF1	55183
205667_at	-0.992434	-0.190933	-10.6867	6.05225e-09	3.09658e-06	10.7646	WRN	7486
220275_at	1.54701	0.165445	10.685	6.06671e-09	3.10049e-06	10.7622	CUZD1	50624
209965_s_at	-0.933556	-0.246665	-10.6822	6.08971e-09	3.10875e-06	10.7583	RAD51D	5892
218108_at	-0.697651	-0.14591	-10.6797	6.11106e-09	3.11615e-06	10.7548	UBR7	55148
218677_at	1.23761	0.378163	10.677	6.13447e-09	3.12458e-06	10.7509	S100A14	57402
220018_at	-1.15055	-0.190788	-10.6611	6.2716e-09	3.19086e-06	10.7284	CBLL1	79872
231983_at	-0.93736	-0.225615	-10.6578	6.30005e-09	3.19968e-06	10.7238	IBA57	200205
227475_at	1.46713	0.434307	10.6575	6.30302e-09	3.19968e-06	10.7233	FOXQ1	94234
231861_at	1.75191	0.388525	10.6513	6.35801e-09	3.21884e-06	10.7144	LRP10	26020
236000_s_at	-1.08015	-0.296763	-10.6511	6.35934e-09	3.21884e-06	10.7142
40446_at	1.08565	0.198447	10.6508	6.36199e-09	3.21884e-06	10.7138	PHF1	5252
44783_s_at	2.76524	0.627556	10.6462	6.40334e-09	3.23616e-06	10.7072	HEY1	23462
216685_s_at	-0.838157	-0.255916	-10.6401	6.45811e-09	3.26022e-06	10.6985	MTAP	4507
219671_at	1.09299	0.164813	10.6377	6.47904e-09	3.26496e-06	10.6952	HPCAL4	51440
219703_at	-1.61175	-0.408225	-10.6374	6.48185e-09	3.26496e-06	10.6948	MNS1	55329
214727_at	-1.83398	-0.353555	-10.6351	6.50324e-09	3.27211e-06	10.6914	BRCA2	675
226938_at	-0.752961	-0.107778	-10.6316	6.53466e-09	3.28348e-06	10.6865	DCAF4	26094
216305_s_at	-1.33872	-0.264014	-10.631	6.54028e-09	3.28348e-06	10.6856	GCFC2	6936
217998_at	0.794448	0.296615	10.6239	6.60554e-09	3.31173e-06	10.6755	PHLDA1, NAP1L1	22822, 4673
204519_s_at	1.32273	0.460125	10.6233	6.61111e-09	3.31173e-06	10.6747	PLLP	51090
235410_at	-1.1026	-0.220542	-10.6206	6.63614e-09	3.32061e-06	10.6708	NPHP3	27031
201038_s_at	-1.25765	-0.292453	-10.6189	6.65143e-09	3.32186e-06	10.6685	ANP32A	8125
201699_at	-0.666323	-0.104493	-10.6178	6.66209e-09	3.32186e-06	10.6668	PSMC6,	5706
203892_at	1.19193	0.217081	10.6165	6.67457e-09	3.32186e-06	10.6649
206280_at	0.986748	0.0980537	10.6153	6.68571e-09	3.32186e-06	10.6632	CDH18	1016
202412_s_at	-0.996149	-0.286168	-10.6152	6.68606e-09	3.32186e-06	10.6632	USP1	7398
224759_s_at	0.767644	0.182418	10.6152	6.68643e-09	3.32186e-06	10.6631	TMEM263	90488
219420_s_at	-0.798092	-0.145017	-10.6148	6.68976e-09	3.32186e-06	10.6626	COA7	65260
202549_at	-1.00216	-0.324987	-10.6099	6.73591e-09	3.34113e-06	10.6556	VAPB	9217
227291_s_at	-1.03869	-0.243626	-10.6081	6.75326e-09	3.34609e-06	10.653	BOLA3	388962
201873_s_at	-1.02937	-0.207281	-10.6072	6.76183e-09	3.34669e-06	10.6517	ABCE1	6059
224483_s_at	-0.748635	-0.0910985	-10.6057	6.77531e-09	3.34972e-06	10.6497	MFSD9	84804
219843_at	-1.26361	-0.251932	-10.6035	6.79669e-09	3.35314e-06	10.6465	IPP	3652
201327_s_at	-0.803286	-0.165722	-10.6035	6.79697e-09	3.35314e-06	10.6464	CCT6A	908
219638_at	-1.59092	-0.43233	-10.5986	6.84312e-09	3.37225e-06	10.6395	FBXO22	26263
213823_at	-1.03777	-0.202686	-10.5971	6.85727e-09	3.37348e-06	10.6374	HOXA11	3207
236595_at	0.74213	0.0767217	10.5968	6.86045e-09	3.37348e-06	10.6369
235311_at	1.32373	0.183681	10.5945	6.8823e-09	3.38057e-06	10.6337	FKBP14	55033
206788_s_at	-1.03358	-0.156514	-10.5921	6.90532e-09	3.38821e-06	10.6303	CBFB	865
207517_at	-1.32307	-0.0462016	-10.5878	6.94722e-09	3.4051e-06	10.6241	LAMC2	3918
229864_at	-0.779235	-0.123064	-10.5832	6.99277e-09	3.42374e-06	10.6175	ELP6	54859
1557285_at	-1.76183	-0.279909	-10.5806	7.01777e-09	3.42898e-06	10.6138
236506_at	-1.01642	-0.117961	-10.5805	7.01856e-09	3.42898e-06	10.6137
236398_s_at	1.16444	0.136735	10.576	7.06334e-09	3.44716e-06	10.6073		101927851
203657_s_at	0.949796	0.168405	10.5691	7.13194e-09	3.4769e-06	10.5974	CTSF	8722
202352_s_at	-0.795746	-0.101877	-10.5666	7.15735e-09	3.48556e-06	10.5938	PSMD12	5718
219017_at	0.886412	0.108953	10.563	7.19281e-09	3.49908e-06	10.5887	ETNK1	55500
206081_at	-2.023	-0.414973	-10.5569	7.25514e-09	3.52563e-06	10.58	SLC24A1	9187
205061_s_at	-0.961938	-0.175898	-10.5521	7.30409e-09	3.54324e-06	10.5731	EXOSC9	5393
240459_at	-1.29183	-0.261796	-10.5518	7.30696e-09	3.54324e-06	10.5727	YTHDC1	91746
228597_at	-1.16204	-0.186914	-10.5471	7.35538e-09	3.5613e-06	10.566	MIS18A	54069
223758_s_at	-1.39226	-0.236208	-10.5464	7.36279e-09	3.5613e-06	10.5649	GTF2H2, GTF2H2C, GTF2H2B	2966, 728340
221970_s_at	-0.862042	-0.142593	-10.5459	7.3677e-09	3.5613e-06	10.5643	NOL11	25926
209715_at	-1.01171	-0.24871	-10.5436	7.39143e-09	3.56898e-06	10.561	CBX5	23468, 100616400
230387_at	-1.16182	-0.229088	-10.5347	7.4844e-09	3.60887e-06	10.5483
217626_at	1.49321	0.571367	10.5342	7.49044e-09	3.60887e-06	10.5474	AKR1C1	1645
236524_at	-1.16809	-0.392121	-10.5329	7.50415e-09	3.60887e-06	10.5456	TM2D1	83941
1560433_at	-1.10217	-0.206157	-10.5327	7.50578e-09	3.60887e-06	10.5453	CLTA	1211
206879_s_at	1.00733	0.253024	10.5232	7.60704e-09	3.65369e-06	10.5317	NRG2	9542
208368_s_at	-1.54633	-0.261886	-10.5134	7.71243e-09	3.6953e-06	10.5177	BRCA2	675
1557321_a_at	1.57003	0.295946	10.5132	7.71467e-09	3.6953e-06	10.5174	CAPN14	440854
203405_at	-0.845744	-0.185042	-10.5129	7.71804e-09	3.6953e-06	10.5169	PSMG1	8624
1554894_a_at	-1.55486	-0.371956	-10.511	7.73826e-09	3.70109e-06	10.5143	PCBD2	84105
209844_at	-0.988226	-0.27867	-10.5062	7.79078e-09	3.72205e-06	10.5074	HOXB13	10481
231411_at	-1.05337	-0.271144	-10.5055	7.79846e-09	3.72205e-06	10.5064
214177_s_at	1.14507	0.199968	10.4967	7.89647e-09	3.76211e-06	10.4936	PBXIP1	57326
225897_at	-1.56934	-0.299924	-10.4964	7.89894e-09	3.76211e-06	10.4933	MARCKS	4082
239841_at	-1.0883	-0.321738	-10.4947	7.91838e-09	3.76588e-06	10.4908
225625_at	-0.821881	-0.170564	-10.4941	7.92497e-09	3.76588e-06	10.49	ALKBH2	121642
214473_x_at	-0.858896	-0.157771	-10.4935	7.93167e-09	3.76588e-06	10.4891	PMS2P3	5387
204088_at	1.33459	0.316759	10.4846	8.03148e-09	3.80928e-06	10.4764	P2RX4	5025
217647_at	-1.09336	-0.333409	-10.4768	8.12024e-09	3.84737e-06	10.4652	DHODH	1723
209806_at	0.795282	0.226599	10.4742	8.15061e-09	3.85774e-06	10.4614
47553_at	1.20623	0.240854	10.4704	8.19493e-09	3.87469e-06	10.4558	WHRN	25861
212634_at	-1.36934	-0.244467	-10.4677	8.22574e-09	3.88522e-06	10.452	UFL1	23376
210216_x_at	-0.788409	-0.129075	-10.4661	8.24417e-09	3.88611e-06	10.4497	RAD1	5810
219895_at	2.22438	0.281687	10.4661	8.24471e-09	3.88611e-06	10.4497	TMEM255A	55026
215984_s_at	-1.11547	-0.224885	-10.4589	8.32884e-09	3.9217e-06	10.4393	ARFRP1	10139
223255_at	-1.06817	-0.209331	-10.458	8.33874e-09	3.9223e-06	10.4381	G2E3	55632
227847_at	-1.28269	-0.245593	-10.4542	8.38359e-09	3.93932e-06	10.4326	EPM2AIP1	9852
229930_at	1.30009	0.17063	10.4492	8.4438e-09	3.96352e-06	10.4253	LINC01315	102723775
236476_at	-1.18566	-0.349673	-10.4482	8.45542e-09	3.96488e-06	10.4239
213348_at	2.74922	0.606634	10.4458	8.48378e-09	3.97408e-06	10.4205	CDKN1C	1028
218440_at	0.820209	0.19292	10.4382	8.57641e-09	4.01334e-06	10.4094	MCCC1	56922
215239_x_at	-1.12608	-0.154296	-10.4274	8.70866e-09	4.07104e-06	10.3938	ZNF273	10793
201577_at	-0.796519	-0.158968	-10.4244	8.74542e-09	4.08403e-06	10.3896	NME1-NME2, NME1	654364, 4830
224280_s_at	0.88025	0.125942	10.4235	8.75613e-09	4.08483e-06	10.3883	MTFR1L	56181
1554415_at	-0.93728	-0.221353	-10.4223	8.7713e-09	4.08772e-06	10.3865	TAF5L	27097
229533_x_at	-1.07265	-0.229277	-10.4154	8.85749e-09	4.12366e-06	10.3766	ZNF680	340252
226155_at	0.850057	0.204277	10.4141	8.87338e-09	4.12683e-06	10.3747	FAM160B1	57700
218979_at	-0.692103	-0.156296	-10.4133	8.88339e-09	4.12727e-06	10.3736	RMI1	80010
1569566_at	1.3948	0.3273	10.4064	8.97123e-09	4.16383e-06	10.3636	TBC1D1	23216
219814_at	-1.36748	-0.285272	-10.4038	9.00371e-09	4.17464e-06	10.3599	MBNL3	55796
210187_at	-1.27062	-0.193298	-10.4025	9.02107e-09	4.1783e-06	10.3579	FKBP1A	2280, 102465524
213334_x_at	-0.823102	-0.157932	-10.4018	9.02997e-09	4.1783e-06	10.3569	HAUS7, TREX2	55559, 11219
210827_s_at	1.06563	-0.110381	10.4004	9.04801e-09	4.18239e-06	10.3549	ELF3,	1999
210594_x_at	-0.815894	-0.131408	-10.3964	9.09874e-09	4.20157e-06	10.3492	MPZL1	9019
219295_s_at	0.964236	0.360776	10.3873	9.21734e-09	4.25202e-06	10.336	PCOLCE2	26577
203726_s_at	-1.21118	-0.113411	-10.3829	9.27612e-09	4.2748e-06	10.3295	LAMA3	3909
242916_at	-1.27759	-0.286263	-10.3789	9.329e-09	4.29355e-06	10.3237	CNTRL	11064
238662_at	-1.15164	-0.20327	-10.3783	9.33569e-09	4.29355e-06	10.323	DPH6	89978
212498_at	0.940264	0.148043	10.3756	9.37207e-09	4.30593e-06	10.319	MARCH6	10299
228859_at	-1.51337	-0.289183	-10.3723	9.41695e-09	4.32218e-06	10.3141	ZGRF1	55345
1553244_at	-1.16826	-0.148419	-10.3707	9.43781e-09	4.32739e-06	10.3119	FANCB	2187
226194_at	-1.25904	-0.273737	-10.3689	9.46191e-09	4.33408e-06	10.3093	CHAMP1	283489
212110_at	1.26599	0.290846	10.3654	9.50935e-09	4.35142e-06	10.3042	SLC39A14	23516
229535_at	0.910371	0.191351	10.3637	9.53209e-09	4.35465e-06	10.3017	PTPMT1	114971
218237_s_at	0.955207	0.221017	10.3635	9.53555e-09	4.35465e-06	10.3014	SLC38A1	81539
242218_at	-1.18838	-0.22502	-10.3616	9.56012e-09	4.36149e-06	10.2987
219067_s_at	-0.874358	-0.23369	-10.3559	9.63903e-09	4.39139e-06	10.2904	NSMCE4A	54780
213984_at	-0.946166	-0.225776	-10.3554	9.64496e-09	4.39139e-06	10.2897	PDS5A	23244
202019_s_at	-0.838126	-0.18809	-10.354	9.66495e-09	4.39366e-06	10.2876	LANCL1	10314
207375_s_at	0.809706	0.186975	10.3531	9.67738e-09	4.39366e-06	10.2863	IL15RA	3601
226577_at	0.749991	0.201341	10.353	9.67893e-09	4.39366e-06	10.2862	PSEN1	5663
210054_at	-0.70383	-0.131872	-10.3498	9.72239e-09	4.40899e-06	10.2816	HAUS3	79441
204027_s_at	-0.744651	-0.256919	-10.3439	9.80486e-09	4.44196e-06	10.273	METTL1	4234
221778_at	0.951556	0.251461	10.3361	9.91423e-09	4.48677e-06	10.2617	KDM7A	80853
219254_at	-0.996608	-0.166268	-10.3355	9.9235e-09	4.48677e-06	10.2607	OGFOD3	79701
222837_s_at	-0.905096	-0.217178	-10.3247	1.00767e-08	4.5515e-06	10.2451	NAA15	80155
223734_at	1.36734	0.173064	10.3234	1.00962e-08	4.5549e-06	10.2431	MGARP	84709
231714_s_at	-0.95905	-0.0785736	-10.3228	1.01042e-08	4.5549e-06	10.2423	AP4B1	10717
218983_at	1.71453	0.326952	10.3136	1.02384e-08	4.61079e-06	10.2289	C1RL	51279
219960_s_at	-0.856233	-0.188408	-10.3087	1.03096e-08	4.6383e-06	10.2218	UCHL5	51377
226320_at	-0.956548	-0.223149	-10.3067	1.03386e-08	4.64676e-06	10.2189	ALYREF	10189
205034_at	-1.75336	-0.420023	-10.3056	1.03553e-08	4.64928e-06	10.2173	CCNE2	9134
1559970_at	-1.3808	-0.242072	-10.3049	1.03653e-08	4.64928e-06	10.2163
215672_s_at	0.819518	0.203234	10.3043	1.03749e-08	4.64928e-06	10.2153	AHCYL2	23382
202909_at	-1.62116	-0.315506	-10.3026	1.04004e-08	4.65612e-06	10.2128	EPM2AIP1	9852
204957_at	-1.25568	-0.232753	-10.3018	1.04121e-08	4.65677e-06	10.2117	ORC5	5001
204459_at	-0.781161	-0.136539	-10.3009	1.04251e-08	4.658e-06	10.2104	CSTF2	1478
235299_at	1.53265	0.252199	10.2977	1.04724e-08	4.67454e-06	10.2058	SLC41A2	84102
213573_at	1.17332	0.289648	10.2955	1.05053e-08	4.68464e-06	10.2026	KPNB1	3837
205084_at	-0.971141	-0.172657	-10.2897	1.05934e-08	4.71348e-06	10.1941	BCAP29	55973
226066_at	1.07668	0.180606	10.2893	1.06002e-08	4.71348e-06	10.1934	MITF	4286
207183_at	-1.64561	-0.30157	-10.2892	1.06011e-08	4.71348e-06	10.1933	GPR19	2842
226833_at	-0.843876	-0.120402	-10.2873	1.06295e-08	4.72151e-06	10.1906	, CYB5D1	124637
209146_at	0.981789	0.290761	10.2832	1.06922e-08	4.7447e-06	10.1846	MSMO1	6307
215359_x_at	-1.15603	-0.15794	-10.2796	1.07472e-08	4.76445e-06	10.1794	ZNF44	51710
210338_s_at	-1.37913	-0.24439	-10.2784	1.07661e-08	4.76821e-06	10.1776	SNORD14C, HSPA8	85389, 3312
1556616_a_at	-1.37443	-0.199091	-10.2737	1.08394e-08	4.79599e-06	10.1707	KLHDC4	54758, 105371397
235394_at	-1.20755	-0.262199	-10.2717	1.087e-08	4.79978e-06	10.1678	PLAA	9373
219366_at	-0.945036	-0.182609	-10.2713	1.08762e-08	4.79978e-06	10.1672	AVEN	57099
229446_at	-1.17496	-0.280479	-10.2711	1.08796e-08	4.79978e-06	10.1669
213057_at	-0.785303	-0.20399	-10.2678	1.09311e-08	4.81782e-06	10.1621	ATPAF2	91647
1556821_x_at	-1.9691	-0.511524	-10.2655	1.09669e-08	4.82894e-06	10.1587
205628_at	-0.989114	-0.182897	-10.2624	1.1016e-08	4.84586e-06	10.1542	, PRIM2	5558
239069_s_at	1.09475	0.260501	10.256	1.1118e-08	4.88598e-06	10.1448
229551_x_at	-1.39688	-0.350077	-10.2519	1.11822e-08	4.90947e-06	10.1389	ZNF367	195828
219510_at	-1.08643	-0.204486	-10.25	1.12129e-08	4.91821e-06	10.1361	POLQ	10721
221085_at	1.91835	0.421277	10.2493	1.12245e-08	4.91856e-06	10.1351	TNFSF15	9966
202350_s_at	1.15856	0.0636419	10.2474	1.12555e-08	4.92738e-06	10.1323	MATN2	4147
210761_s_at	1.95539	0.399506	10.2462	1.12744e-08	4.93089e-06	10.1305	GRB7	2886
205847_at	0.886649	0.155235	10.2452	1.12908e-08	4.93336e-06	10.1291	PRSS22	64063
223443_s_at	-1.01105	-0.22933	-10.2445	1.13024e-08	4.93365e-06	10.128	AMZ2P1	201283
203150_at	-0.852877	-0.182131	-10.2431	1.13254e-08	4.93895e-06	10.1259	RABEPK	10244
208216_at	1.27812	0.354204	10.2414	1.1353e-08	4.94413e-06	10.1235	DLX4	1748
204935_at	-1.50463	-0.290169	-10.241	1.1359e-08	4.94413e-06	10.1229	PTPN2	5771
203359_s_at	-1.46312	-0.361181	-10.2357	1.14453e-08	4.97695e-06	10.1152	, MYCBP	26292
205281_s_at	-0.863103	-0.0837367	-10.2334	1.14842e-08	4.98907e-06	10.1117	PIGA	5277
239989_at	-1.06602	-0.366968	-10.2287	1.15613e-08	5.01647e-06	10.1049	CNTLN	54875
214871_x_at	-1.65224	-0.459731	-10.2282	1.15693e-08	5.01647e-06	10.1042
204728_s_at	-1.01864	-0.174904	-10.2239	1.16418e-08	5.0431e-06	10.0978	WDHD1	11169
1554390_s_at	-1.1424	-0.237447	-10.221	1.16899e-08	5.05912e-06	10.0936	ACTR2	10097
221586_s_at	0.985632	0.199384	10.2162	1.17719e-08	5.08975e-06	10.0865	E2F5	1875
201516_at	-1.1753	-0.248092	-10.2146	1.17978e-08	5.09611e-06	10.0843	SRM	6723
222856_at	-1.15826	-0.160756	-10.2122	1.18397e-08	5.10936e-06	10.0806	APLN	8862
227578_at	-1.18211	-0.260053	-10.2013	1.20256e-08	5.18469e-06	10.0647	TMPO-AS1	100128191
233105_at	-1.45441	-0.305171	-10.1966	1.21079e-08	5.21519e-06	10.0578
218613_at	1.14726	0.255315	10.1947	1.21403e-08	5.22346e-06	10.0551	PSD3	23362
218768_at	-0.777063	-0.138339	-10.1942	1.215e-08	5.22346e-06	10.0542	NUP107	57122
222266_at	-0.944593	-0.263023	-10.1914	1.21991e-08	5.23961e-06	10.0501
213893_x_at	-0.806121	-0.189117	-10.1877	1.22643e-08	5.26263e-06	10.0447	PMS2P6, , PMS2P10, DTX2P1-UPK3BP1-PMS2P11, PMS2P2, PMS2P7	441263
201930_at	-1.26539	-0.400471	-10.1804	1.23942e-08	5.31335e-06	10.0339	MCM6	4175
229083_at	-1.20233	-0.228242	-10.1778	1.24401e-08	5.32802e-06	10.0302	HNRNPA0	10949
229095_s_at	1.00276	0.205915	10.1754	1.24826e-08	5.34119e-06	10.0267		440895, 100507334
226140_s_at	1.49659	0.290266	10.1746	1.24976e-08	5.34258e-06	10.0255	OTUD1	220213
200866_s_at	0.826023	0.149845	10.1707	1.25679e-08	5.36761e-06	10.0197	PSAP	5660
228382_at	-0.981328	-0.211514	-10.1672	1.26327e-08	5.39019e-06	10.0145	OTULIN	90268
204000_at	1.10483	0.188606	10.1656	1.26609e-08	5.39061e-06	10.0122	GNB5	10681
203164_at	0.762708	0.222143	10.1653	1.26665e-08	5.39061e-06	10.0118	SLC33A1	9197
209684_at	-0.906851	-0.256452	-10.1652	1.26692e-08	5.39061e-06	10.0116	RIN2	54453
1554271_a_at	-1.15719	-0.214394	-10.1628	1.27133e-08	5.4043e-06	10.008	CENPL	91687
204237_at	1.98007	0.40701	10.1617	1.27322e-08	5.4073e-06	10.0065	GULP1	51454
241937_s_at	-1.30782	-0.326858	-10.1574	1.28124e-08	5.43341e-06	10.0001	WDR4	10785
225885_at	-0.737867	-0.206127	-10.1566	1.28271e-08	5.43341e-06	9.99892	EEA1	8411
1569190_at	-1.88419	-0.306035	-10.1565	1.28295e-08	5.43341e-06	9.99873	SCLT1	132320
226834_at	-0.763768	0.164981	-10.1529	1.28955e-08	5.45629e-06	9.99349	CLMP	79827
206561_s_at	1.37251	0.250363	10.1519	1.29141e-08	5.45907e-06	9.99202	AKR1B10	57016
211709_s_at	0.715627	0.152418	10.1507	1.2937e-08	5.46366e-06	9.99021	CLEC11A	6320
218544_s_at	-0.709842	-0.168119	-10.1496	1.29578e-08	5.46738e-06	9.98857	RCL1	10171
201951_at	0.714648	0.0846873	10.1431	1.30793e-08	5.51355e-06	9.97905	ALCAM	214
225696_at	-0.623693	-0.185664	-10.1409	1.31209e-08	5.52595e-06	9.97581	COPS7B	64708
215170_s_at	-0.6994	-0.105164	-10.1397	1.3144e-08	5.53055e-06	9.97402	CEP152	22995
229886_at	-1.45786	-0.208678	-10.1369	1.31964e-08	5.54478e-06	9.96996	C5orf34	375444
235940_at	-0.839159	-0.168328	-10.1366	1.32022e-08	5.54478e-06	9.96951	C9orf64	84267
209641_s_at	1.29982	0.460237	10.1357	1.32206e-08	5.54741e-06	9.96808	ABCC3	8714
227541_at	-1.18048	-0.239854	-10.1343	1.32466e-08	5.55106e-06	9.96609	WDR20	91833
202867_s_at	-0.711942	-0.212916	-10.1339	1.32537e-08	5.55106e-06	9.96553	DNAJB12	54788
221650_s_at	-0.916344	-0.132267	-10.1327	1.32772e-08	5.55578e-06	9.96372	MED18	54797
213476_x_at	-0.794953	-0.0718858	-10.1313	1.33044e-08	5.56204e-06	9.96164	TUBB2B, , TUBB4A, TUBB2A, TUBB3	347733, 10382, 7280, 10381
212151_at	0.704083	-0.0126884	10.1268	1.33921e-08	5.59354e-06	9.95494	PBX1	5087
227260_at	0.843057	0.117814	10.1248	1.34294e-08	5.60398e-06	9.9521
223330_s_at	-0.869792	-0.169011	-10.1237	1.3451e-08	5.60787e-06	9.95045	SUGT1	10910
218258_at	0.91823	0.219924	10.122	1.34846e-08	5.61178e-06	9.94791	POLR1D	51082
229370_at	-1.39814	-0.161587	-10.1219	1.34866e-08	5.61178e-06	9.94776
200813_s_at	-0.945349	-0.311159	-10.1214	1.34974e-08	5.61178e-06	9.94694	PAFAH1B1	5048
204244_s_at	-1.1318	-0.159861	-10.1202	1.35199e-08	5.616e-06	9.94524	DBF4	10926
212978_at	-0.73814	-0.248098	-10.1158	1.36071e-08	5.6457e-06	9.93868	LRRC8B	23507
210552_s_at	1.17605	0.15572	10.1153	1.36163e-08	5.6457e-06	9.938	RALGPS1	9649
221902_at	1.03529	0.166078	10.1044	1.38325e-08	5.73014e-06	9.92192	GPR153	387509
51228_at	-1.60585	-0.375527	-10.1007	1.39084e-08	5.75634e-06	9.91633	RBM12B	389677
210250_x_at	-0.897921	-0.225491	-10.0966	1.3991e-08	5.78526e-06	9.91029	ADSL	158
212411_at	-0.774332	-0.162058	-10.0951	1.40199e-08	5.79193e-06	9.90819	IMP4	92856
229455_at	-1.57825	-0.238239	-10.0919	1.40869e-08	5.81434e-06	9.90332
217776_at	0.773392	0.190263	10.0812	1.43066e-08	5.89639e-06	9.88752	RDH11	51109
244764_at	1.20813	0.0875135	10.081	1.43116e-08	5.89639e-06	9.88717	HIVEP3	59269
209398_at	1.38465	0.21916	10.0787	1.43595e-08	5.90589e-06	9.88376	HIST1H1C	3006
228596_at	1.84717	0.391943	10.0786	1.43606e-08	5.90589e-06	9.88368
203543_s_at	1.57627	0.286794	10.0775	1.43834e-08	5.90845e-06	9.88206	KLF9	687
223417_at	-1.20356	-0.262982	-10.0771	1.43928e-08	5.90845e-06	9.88139	RAD18	56852
238903_at	-0.866271	-0.159423	-10.0755	1.44252e-08	5.91638e-06	9.8791	UBXN2B	137886
227962_at	1.0537	0.265559	10.0699	1.45428e-08	5.95923e-06	9.87082	ACOX1	51
221514_at	-0.951884	-0.174042	-10.0689	1.45646e-08	5.96282e-06	9.86929	UTP14A	10813
232991_at	-0.938389	-0.306493	-10.0617	1.47175e-08	6.01898e-06	9.85863
235164_at	-1.07482	-0.195504	-10.0612	1.47282e-08	6.01898e-06	9.85788	ZNF25	219749
228157_at	-1.37469	-0.273663	-10.0601	1.47527e-08	6.02355e-06	9.85619	ZNF207	7756, 693217
235026_at	-1.06141	-0.13108	-10.0563	1.48337e-08	6.05043e-06	9.8506	C12orf66	144577
203071_at	0.791825	0.153006	10.0558	1.48451e-08	6.05043e-06	9.84982	SEMA3B	7869, 102465526
1556033_at	0.801005	0.17332	10.0531	1.49029e-08	6.06853e-06	9.84585	LINC01138
1558128_at	-1.04955	-0.203793	-10.0517	1.49329e-08	6.07531e-06	9.8438
220945_x_at	-0.852693	-0.222701	-10.051	1.49496e-08	6.07667e-06	9.84266	MANSC1	54682
239231_at	-0.930051	-0.123414	-10.0477	1.50204e-08	6.09476e-06	9.83784	ZNF101	94039
232382_s_at	1.09638	0.277772	10.0473	1.50289e-08	6.09476e-06	9.83726
1554445_at	-1.3271	-0.322363	-10.0463	1.50522e-08	6.09476e-06	9.83568	ZNF85	7639
238953_at	-2.25603	-0.62292	-10.046	1.50575e-08	6.09476e-06	9.83532	SP2-AS1
209460_at	1.14823	0.105277	10.0459	1.50611e-08	6.09476e-06	9.83508	ABAT	18
224509_s_at	-0.799504	-0.212233	-10.0402	1.51845e-08	6.13924e-06	9.82675	RTN4IP1	84816
202478_at	1.18674	0.258674	10.038	1.52335e-08	6.15359e-06	9.82346	TRIB2	28951
238681_at	1.19011	0.225363	10.0312	1.53852e-08	6.20934e-06	9.81334	GDPD1	284161
208663_s_at	0.789586	0.136403	10.0303	1.54067e-08	6.21252e-06	9.81192	TTC3	7267
205352_at	0.986011	0.0991454	10.0287	1.54412e-08	6.22093e-06	9.80963	SERPINI1	5274
203966_s_at	0.742412	0.151638	10.0257	1.55099e-08	6.23839e-06	9.8051	PPM1A	5494
1552738_a_at	-1.07723	-0.298087	-10.0256	1.5512e-08	6.23839e-06	9.80496	ST7L	54879
209631_s_at	1.50837	0.259668	10.0196	1.56493e-08	6.28457e-06	9.79597	GPR37	2861
226656_at	0.997228	0.189614	10.0193	1.56545e-08	6.28457e-06	9.79563	CRTAP	10491
232323_s_at	1.01422	0.16213	10.0141	1.57752e-08	6.32744e-06	9.78779	TTC17	55761
209019_s_at	1.15711	0.295944	10.0075	1.59265e-08	6.3825e-06	9.77805	PINK1	65018, 102464833
222963_s_at	1.74597	0.407703	10.0038	1.60135e-08	6.41173e-06	9.77249	IL1RAPL1	11141
218282_at	1.05466	0.240547	10.003	1.60316e-08	6.41331e-06	9.77134	EDEM2	55741
228323_at	-0.972126	-0.1599	-9.99888	1.61289e-08	6.44659e-06	9.76515	CASC5	57082
210707_x_at	-0.779805	-0.208727	-9.99477	1.62261e-08	6.47974e-06	9.75902	PMS2P5, PMS2P11, PMS2P3, , DTX2P1-UPK3BP1-PMS2P11, PMS2P9	5387, 441263
229385_s_at	1.62651	0.37738	9.99397	1.62451e-08	6.48161e-06	9.75783	TINCR
219105_x_at	-0.898885	-0.12533	-9.99328	1.62615e-08	6.48247e-06	9.7568	ORC6	23594
232242_at	-1.81834	-0.454113	-9.99078	1.63208e-08	6.50044e-06	9.75308	PTPRG-AS1	100506994
203308_x_at	0.802644	0.23255	9.98889	1.63661e-08	6.51275e-06	9.75026	HPS1	3257
223459_s_at	1.131	0.282402	9.98677	1.64168e-08	6.52724e-06	9.74709	C1orf56	54964
235509_at	-0.795662	-0.190718	-9.97677	1.66589e-08	6.6177e-06	9.73215	NDUFAF6	137682
243887_at	-0.915661	-0.200617	-9.9736	1.67363e-08	6.64266e-06	9.72742	MRPL30	51263
223639_s_at	-0.854419	-0.129446	-9.96422	1.69676e-08	6.72858e-06	9.71341	ZNRD1	30834
40255_at	-1.29046	-0.16818	-9.95307	1.72472e-08	6.83349e-06	9.69672	DDX28	55794
233070_at	-0.88189	-0.158875	-9.95217	1.72697e-08	6.83648e-06	9.69539	ZNF197	10168
211707_s_at	-0.805334	-0.136281	-9.95017	1.73205e-08	6.85059e-06	9.69239	IQCB1	9657
213412_at	1.32118	0.192138	9.94857	1.73612e-08	6.86075e-06	9.68999	TJP3	27134
236935_at	1.21861	0.319241	9.94338	1.74938e-08	6.90546e-06	9.68223	PTPN4	5775
222494_at	0.891804	0.148231	9.94296	1.75047e-08	6.90546e-06	9.68159	FOXN3	1112
202413_s_at	-0.783828	-0.198564	-9.9413	1.75472e-08	6.91621e-06	9.67912	USP1	7398
217809_at	-0.904673	-0.241171	-9.93494	1.77119e-08	6.9751e-06	9.66958	BZW2	28969
203860_at	0.854089	0.142393	9.93108	1.78124e-08	7.00861e-06	9.6638	PCCA	5095
226889_at	-1.26163	-0.270548	-9.92522	1.79663e-08	7.06304e-06	9.65502	WDR35	57539
208579_x_at	0.956133	0.243364	9.92391	1.80011e-08	7.0706e-06	9.65304	HIST1H2BK, H2BFS,	85236, 102724334
1552306_at	-1.3931	-0.234187	-9.92202	1.80509e-08	7.07833e-06	9.65022	ALG10	84920
210513_s_at	1.51828	0.326701	9.92145	1.80661e-08	7.07833e-06	9.64936	VEGFA	7422
232398_at	-1.06028	-0.18784	-9.9214	1.80674e-08	7.07833e-06	9.64929	CCDC150	284992
1569303_s_at	0.867289	0.291683	9.9183	1.81499e-08	7.1003e-06	9.64463	RGS20	8601
235459_at	1.3063	0.168838	9.91812	1.81547e-08	7.1003e-06	9.64436	RNF41	10193
218857_s_at	1.10778	0.131355	9.91451	1.82512e-08	7.1227e-06	9.63895	ASRGL1	80150
1552487_a_at	-1.07075	-0.206671	-9.91424	1.82586e-08	7.1227e-06	9.63854	BNC1	646
211547_s_at	-1.27183	-0.386107	-9.91422	1.8259e-08	7.1227e-06	9.63852	PAFAH1B1	5048
218581_at	0.935255	0.226294	9.91265	1.83013e-08	7.13065e-06	9.63615	ABHD4	63874
213571_s_at	-0.752786	-0.0739346	-9.9123	1.83107e-08	7.13065e-06	9.63563	EIF4E2	9470
203408_s_at	2.01841	0.427299	9.91033	1.83637e-08	7.14519e-06	9.63268	SATB1	6304
212866_at	-0.716407	-0.199729	-9.89778	1.87059e-08	7.27207e-06	9.61383	R3HCC1	203069
226939_at	1.62918	0.475175	9.89711	1.87245e-08	7.27311e-06	9.61281	CPEB2	132864
209230_s_at	1.70338	-0.00130559	9.89254	1.88508e-08	7.31591e-06	9.60595	NUPR1	26471
228575_at	1.27573	0.322642	9.88962	1.89321e-08	7.33927e-06	9.60155	IL20RB	53833
225161_at	-0.971464	-0.202473	-9.88922	1.89432e-08	7.33927e-06	9.60095	GFM1	85476
223479_s_at	-0.986295	-0.20631	-9.88809	1.89747e-08	7.34522e-06	9.59925	CHCHD5	84269
225047_at	-0.663127	-0.149109	-9.88746	1.89923e-08	7.34576e-06	9.59831	NUP58	9818
201066_at	0.641598	0.0663225	9.88444	1.90771e-08	7.37229e-06	9.59376	CYC1	1537
218570_at	-0.747736	-0.11375	-9.88358	1.91011e-08	7.3753e-06	9.59248	KBTBD4	55709
203124_s_at	0.788462	0.222671	9.88119	1.91685e-08	7.39506e-06	9.58888	SLC11A2	4891
235875_at	-0.95976	-0.247966	-9.88048	1.91885e-08	7.39648e-06	9.58782
232652_x_at	0.680741	0.135726	9.87898	1.92312e-08	7.40666e-06	9.58555	SCAND1	51282
224984_at	0.972692	0.116428	9.87707	1.92851e-08	7.41569e-06	9.58269	, NFAT5	10725
1553510_s_at	-0.848695	-0.19209	-9.877	1.92872e-08	7.41569e-06	9.58258	CNOT9	9125
225173_at	-0.890687	-0.278831	-9.87533	1.93348e-08	7.42769e-06	9.58006	ARHGAP18	93663
207723_s_at	1.83154	0.0927173	9.87396	1.93737e-08	7.43442e-06	9.57801	KLRC3,	3823
1559005_s_at	-1.54508	-0.429181	-9.87357	1.9385e-08	7.43442e-06	9.57741	CNTLN	54875
202377_at	0.904157	0.179768	9.87136	1.94482e-08	7.45237e-06	9.57409	LEPROT	54741
229423_at	-1.19179	-0.19139	-9.86931	1.95072e-08	7.46871e-06	9.57099
219052_at	-1.40896	-0.300375	-9.86861	1.95273e-08	7.47013e-06	9.56994	HPS6	79803
213895_at	0.888489	0.194608	9.86354	1.96739e-08	7.5174e-06	9.5623	EMP1	2012
236907_at	-0.99059	-0.153148	-9.86319	1.9684e-08	7.5174e-06	9.56178
236153_at	-1.32264	-0.325651	-9.85978	1.97832e-08	7.53256e-06	9.55665
205745_x_at	0.758725	0.186832	9.85939	1.97947e-08	7.53256e-06	9.55606	ADAM17	6868
220083_x_at	-1.15912	-0.214997	-9.85927	1.97983e-08	7.53256e-06	9.55587	UCHL5	51377
241569_at	-1.62702	-0.453376	-9.85835	1.9825e-08	7.53256e-06	9.55449
204348_s_at	-0.898047	-0.131381	-9.85828	1.98272e-08	7.53256e-06	9.55438	AK4P3, AK4, AK4P1	205
201694_s_at	-3.4572	-0.581786	-9.85731	1.98556e-08	7.53256e-06	9.55292	EGR1	1958
231862_at	-1.1647	-0.331524	-9.8573	1.98558e-08	7.53256e-06	9.55291	CBX5	23468, 100616400
242230_at	1.33171	0.213767	9.85685	1.98689e-08	7.53256e-06	9.55223	ATXN1	6310
223274_at	-1.0823	-0.280847	-9.85664	1.98752e-08	7.53256e-06	9.55191	TCF19	6941
243764_at	1.08201	0.253124	9.85616	1.98893e-08	7.53256e-06	9.55119	VSIG1	340547
218726_at	-1.23886	-0.193803	-9.85472	1.99315e-08	7.54228e-06	9.54902	HJURP	55355
204240_s_at	-1.00167	-0.183128	-9.85368	1.99621e-08	7.54759e-06	9.54745	SMC2	10592
213912_at	-1.31246	-0.282735	-9.85117	2.00364e-08	7.56937e-06	9.54366	TBC1D30	23329
1552619_a_at	-1.17228	-0.224777	-9.84936	2.009e-08	7.58331e-06	9.54093	ANLN	54443
229845_at	-0.932453	-0.143166	-9.84356	2.02629e-08	7.64226e-06	9.53218	MAPKAP1	79109
238432_at	0.976213	0.296147	9.84107	2.03376e-08	7.66407e-06	9.52842	DLGAP1-AS1
235203_at	-1.85008	-0.394693	-9.83852	2.04143e-08	7.68583e-06	9.52458
222551_s_at	-0.914988	-0.117366	-9.83803	2.04292e-08	7.68583e-06	9.52383	C8orf33	65265
221241_s_at	1.03943	0.132219	9.83621	2.04842e-08	7.70016e-06	9.52109	BCL2L14	79370
226341_at	-0.887466	-0.200996	-9.82971	2.0682e-08	7.7681e-06	9.51127	OTUD6B-AS1	100506365
218630_at	-0.692135	-0.110937	-9.8275	2.07496e-08	7.78176e-06	9.50794	MKS1	54903
222111_at	-1.32551	-0.265037	-9.82734	2.07544e-08	7.78176e-06	9.5077	FAM63B	54629
215489_x_at	0.926298	0.200091	9.82614	2.07914e-08	7.78176e-06	9.50588	HOMER3	9454
1553099_at	-1.22577	-0.208866	-9.82578	2.08026e-08	7.78176e-06	9.50533	TIGD1	200765, 100847037
230157_at	1.22785	0.233356	9.82573	2.08039e-08	7.78176e-06	9.50527	CDH24	64403
220865_s_at	-1.09952	-0.246927	-9.82278	2.08951e-08	7.80947e-06	9.5008	PDSS1	23590
201170_s_at	1.5188	0.376958	9.82049	2.0966e-08	7.82952e-06	9.49734	BHLHE40	8553
218897_at	-1.01273	-0.158821	-9.81892	2.10148e-08	7.8413e-06	9.49497	TMEM177	80775
227599_at	-1.22923	-0.25343	-9.81779	2.10498e-08	7.84794e-06	9.49327	MB21D2	151963
209380_s_at	1.20826	0.26137	9.81438	2.11565e-08	7.88125e-06	9.4881	ABCC5	10057
200644_at	0.781246	0.211833	9.81274	2.12077e-08	7.88905e-06	9.48563	MARCKSL1	65108
208647_at	0.697779	0.16434	9.8126	2.12122e-08	7.88905e-06	9.48542	FDFT1	2222
219730_at	-1.17554	-0.177777	-9.81083	2.12678e-08	7.90331e-06	9.48274	MED18	54797
203313_s_at	1.04029	0.25636	9.81011	2.12905e-08	7.90527e-06	9.48166	TGIF1	7050
36936_at	-0.858683	-0.201753	-9.80831	2.13476e-08	7.92001e-06	9.47892	TSTA3	7264
203278_s_at	1.17542	0.216918	9.79543	2.17589e-08	8.06602e-06	9.45943	PHF21A	51317
218992_at	-0.989816	-0.164527	-9.79284	2.18427e-08	8.09049e-06	9.4555	PLGRKT	55848
225143_at	-0.669385	-0.12941	-9.78814	2.19954e-08	8.1404e-06	9.44839	SFXN4	119559
1555281_x_at	-0.980985	-0.202394	-9.78502	2.20976e-08	8.17158e-06	9.44365	ARMC8	25852
213803_at	1.04583	0.194674	9.78258	2.21775e-08	8.19448e-06	9.43997	KPNB1	3837
230860_at	1.19653	0.22296	9.78086	2.22343e-08	8.20881e-06	9.43735	CEP19	84984
209276_s_at	1.68948	0.253269	9.77203	2.25275e-08	8.31031e-06	9.42397	GLRX	2745
235425_at	-1.16841	-0.21918	-9.76639	2.27172e-08	8.36889e-06	9.4154	SGO2	151246
204186_s_at	-0.66768	-0.130587	-9.76572	2.27397e-08	8.36889e-06	9.41439	PPID	5481
221709_s_at	-0.900481	-0.241113	-9.76567	2.27415e-08	8.36889e-06	9.41431	ZNF839	55778
210778_s_at	1.21603	0.175739	9.76482	2.27703e-08	8.37269e-06	9.41302	MXD4	10608, 100616358
214522_x_at	1.10111	0.275352	9.75558	2.30851e-08	8.48161e-06	9.39899	, HIST1H2AD	3013
215136_s_at	-0.769868	-0.144094	-9.75202	2.32077e-08	8.51976e-06	9.39358	EXOSC8	11340
200737_at	-1.0709	-0.178021	-9.74983	2.32834e-08	8.54065e-06	9.39026	PGK1	5230
224413_s_at	-1.00623	-0.193098	-9.74929	2.33023e-08	8.54071e-06	9.38943	TM2D2	83877
209372_x_at	-0.860856	-0.111344	-9.7487	2.33225e-08	8.54124e-06	9.38854	TUBB2B, TUBB2A, TUBB2BP1	347733, 7280
219408_at	-0.891486	-0.239082	-9.74689	2.33854e-08	8.55737e-06	9.38579	PRMT7	54496
201477_s_at	-0.77923	-0.168132	-9.74184	2.3562e-08	8.61373e-06	9.37811	RRM1	6240
204679_at	0.627583	0.179967	9.7414	2.35773e-08	8.61373e-06	9.37744	KCNK1	3775
211721_s_at	-1.15604	-0.26824	-9.74061	2.36052e-08	8.617e-06	9.37624	ZNF551	90233
201576_s_at	0.905165	0.22081	9.73664	2.37449e-08	8.66104e-06	9.37021	GLB1	2720
1569607_s_at	-1.57024	-0.392275	-9.73348	2.3857e-08	8.69496e-06	9.3654
242273_at	-1.85435	-0.410442	-9.726	2.41243e-08	8.78533e-06	9.35402	LLPH	84298
244427_at	-1.21911	-0.228379	-9.71906	2.43754e-08	8.86969e-06	9.34343
201115_at	-1.03208	-0.194091	-9.71807	2.44114e-08	8.8757e-06	9.34193	POLD2	5425
229213_at	1.22954	0.274751	9.71105	2.4668e-08	8.96182e-06	9.33124	DIRC2	84925
1553167_a_at	-1.10258	-0.157632	-9.70688	2.48221e-08	9.00371e-06	9.32488	SEPSECS	51091
238070_at	-1.13074	-0.19983	-9.70686	2.48229e-08	9.00371e-06	9.32485
225329_at	-0.752202	-0.127208	-9.70464	2.49053e-08	9.0264e-06	9.32146	MCRIP1	348262
230925_at	1.46889	0.390284	9.70053	2.50587e-08	9.07476e-06	9.31519	APBB1IP	54518
202378_s_at	0.970792	0.223589	9.69937	2.51019e-08	9.08296e-06	9.31343	LEPROT	54741
228923_at	1.19879	0.379041	9.69886	2.51212e-08	9.08296e-06	9.31264	S100A6	6277
230307_at	-1.21881	-0.235235	-9.69651	2.52095e-08	9.10764e-06	9.30906	SLC25A21-AS1	100129794
228987_at	0.914307	0.112813	9.69564	2.52421e-08	9.10941e-06	9.30774	FAM49B	51571
203719_at	0.67394	0.11375	9.69531	2.52545e-08	9.10941e-06	9.30724	ERCC1	2067
224444_s_at	-1.19644	-0.256659	-9.68683	2.55767e-08	9.21831e-06	9.29429	LINC00467
202905_x_at	-0.734023	-0.188007	-9.68342	2.57072e-08	9.25803e-06	9.28908	NBN	4683
33494_at	0.748322	0.0679559	9.67851	2.58969e-08	9.31518e-06	9.28157	ETFDH	2110
204739_at	-1.24974	-0.256359	-9.67825	2.59069e-08	9.31518e-06	9.28118	CENPC, CENPCP1	1060
223212_at	0.637867	0.0844463	9.67354	2.609e-08	9.37363e-06	9.27398	ZDHHC16	84287
1561969_at	1.33444	0.247738	9.67229	2.61387e-08	9.38371e-06	9.27208	ZPLD1	131368
228243_at	0.815246	0.174566	9.6707	2.62012e-08	9.39158e-06	9.26964
202886_s_at	-1.03862	-0.193789	-9.6706	2.62051e-08	9.39158e-06	9.26949	PPP2R1B	5519
203968_s_at	-0.974123	-0.213429	-9.67015	2.62226e-08	9.39158e-06	9.2688	CDC6	990
218884_s_at	-0.953378	-0.250928	-9.66904	2.62661e-08	9.39975e-06	9.26711	GUF1	60558
223258_s_at	-1.22291	-0.247737	-9.6675	2.63267e-08	9.41405e-06	9.26475	G2E3	55632
229828_at	1.03513	0.169157	9.66498	2.64265e-08	9.44229e-06	9.26089	CDC73	79577
234040_at	-1.50717	-0.350871	-9.66381	2.64728e-08	9.45141e-06	9.2591	HELLS	3070
207233_s_at	1.03851	0.185085	9.66251	2.65241e-08	9.45695e-06	9.25712	MITF	4286
201138_s_at	-0.705244	-0.111045	-9.66237	2.65299e-08	9.45695e-06	9.2569	SSB	6741
1554082_a_at	-0.895917	-0.19206	-9.66174	2.65549e-08	9.45847e-06	9.25594	NOL9	79707
202957_at	-1.15286	-0.07986	-9.66078	2.65931e-08	9.46466e-06	9.25447	HCLS1	3059
1552711_a_at	-0.764783	-0.186424	-9.65838	2.66889e-08	9.49134e-06	9.25079	, CYB5D1	124637
244777_at	-1.25626	-0.334061	-9.65756	2.67215e-08	9.49549e-06	9.24955	DCP2	167227
1554283_at	-1.15313	-0.300675	-9.65608	2.67809e-08	9.50916e-06	9.24728	NOCT	25819
231618_s_at	2.15501	0.556314	9.65513	2.6819e-08	9.51083e-06	9.24583	SUN3	256979
213989_x_at	-0.96091	-0.188688	-9.65462	2.68396e-08	9.51083e-06	9.24504	SETD4	54093
219004_s_at	-1.04489	-0.204726	-9.6544	2.68483e-08	9.51083e-06	9.24471	MIS18A	54069
206662_at	1.58036	0.252483	9.65359	2.68808e-08	9.51494e-06	9.24347	GLRX	2745
1554294_s_at	-1.09285	-0.339519	-9.65279	2.69133e-08	9.51903e-06	9.24224	TTBK2	146057
218564_at	-1.03682	-0.26149	-9.64543	2.72118e-08	9.61712e-06	9.23097	RFWD3	55159
218356_at	-1.07553	-0.23209	-9.64001	2.74336e-08	9.68799e-06	9.22267	MRM2	29960
235848_x_at	-1.42774	-0.369132	-9.63886	2.7481e-08	9.69457e-06	9.22091	ATL2	64225
206095_s_at	-0.805431	-0.197312	-9.63852	2.74949e-08	9.69457e-06	9.22039	SRSF10	10772
242574_at	-0.706012	-0.0994359	-9.63178	2.77744e-08	9.78556e-06	9.21006
236312_at	-1.61957	-0.292873	-9.63037	2.78333e-08	9.7987e-06	9.20789	MAD2L1	4085
219927_at	-1.03606	-0.147592	-9.62858	2.79081e-08	9.81746e-06	9.20515	FCF1	51077
224298_s_at	0.767677	0.125038	9.62701	2.79741e-08	9.83307e-06	9.20274	UBAC2	337867
1569154_a_at	0.709791	0.0958426	9.62591	2.80202e-08	9.84166e-06	9.20105
244732_at	-1.08981	-0.234223	-9.61803	2.8354e-08	9.95122e-06	9.18895
1553954_at	-0.912243	-0.239214	-9.61415	2.85194e-08	1.00015e-05	9.18301	ALG14	199857
1557218_s_at	-1.17587	-0.207696	-9.61093	2.8658e-08	1.00424e-05	9.17805	FANCB	2187
201586_s_at	-1.27943	-0.302881	-9.60581	2.88792e-08	1.01121e-05	9.1702	SFPQ	6421
238435_at	-1.29928	-0.249734	-9.6029	2.90058e-08	1.01487e-05	9.16573	CA5BP1	340591
202483_s_at	-0.627403	-0.180223	-9.60168	2.90593e-08	1.01595e-05	9.16384	RANBP1,	5902
215287_at	-1.29523	-0.320779	-9.60065	2.91042e-08	1.01607e-05	9.16227	, STRN	6801
232001_at	-0.870808	-0.193364	-9.60058	2.91073e-08	1.01607e-05	9.16216	PRKCQ-AS1
212423_at	1.56823	0.387807	9.59749	2.9243e-08	1.02003e-05	9.1574	ZCCHC24	219654
218927_s_at	0.912503	0.134948	9.59646	2.92882e-08	1.02082e-05	9.15583	CHST12	55501, 101927181
240032_at	-1.50204	-0.381944	-9.59352	2.9418e-08	1.02456e-05	9.1513		105274304
207165_at	-1.20877	-0.212755	-9.59079	2.95391e-08	1.02799e-05	9.14711	HMMR	3161
201458_s_at	-0.888457	-0.149548	-9.58675	2.97193e-08	1.03347e-05	9.14089	BUB3	9184
225391_at	-0.831626	-0.154076	-9.58624	2.97424e-08	1.03348e-05	9.1401
217754_at	-0.699018	-0.171723	-9.58556	2.97726e-08	1.03374e-05	9.13906	DDX56	54606
1558015_s_at	-1.18583	-0.238236	-9.58489	2.98029e-08	1.03401e-05	9.13802	ACTR2	10097
235363_at	-1.12735	-0.218689	-9.58343	2.98686e-08	1.03549e-05	9.13577
232065_x_at	-0.876346	-0.159483	-9.58216	2.99253e-08	1.03667e-05	9.13383	CENPL	91687
222130_s_at	-0.855494	-0.210603	-9.58109	2.9974e-08	1.03757e-05	9.13217	MRM2	29960
243634_at	1.39003	0.305573	9.57775	3.0125e-08	1.042e-05	9.12704	SMIM14	201895
223590_at	-0.758307	-0.205334	-9.57427	3.02834e-08	1.04668e-05	9.12168	ZNF700,	90592
207884_at	0.972896	0.230797	9.57121	3.04234e-08	1.05065e-05	9.11696	GUCY2D	3000
228415_at	-0.820574	-0.126456	-9.57049	3.04565e-08	1.05065e-05	9.11585	AP1S2	8905
203622_s_at	-0.845469	-0.167885	-9.57025	3.04676e-08	1.05065e-05	9.11548	PNO1	56902
244354_at	-1.17371	-0.270606	-9.56387	3.07621e-08	1.06001e-05	9.10565	, STRN	6801
204985_s_at	0.948965	0.0363033	9.55901	3.09882e-08	1.06699e-05	9.09816	TRAPPC6A	79090
230104_s_at	1.38926	0.286328	9.55733	3.10671e-08	1.06863e-05	9.09556	TPPP	11076
229975_at	-0.983259	-0.0615692	-9.55699	3.1083e-08	1.06863e-05	9.09504	BMPR1B	658
215729_s_at	-1.55835	-0.507585	-9.55248	3.1295e-08	1.07493e-05	9.08809	VGLL1	51442
241359_at	1.18193	0.0668788	9.5521	3.13132e-08	1.07493e-05	9.0875	TLCD2	727910
202439_s_at	-0.826316	-0.106456	-9.55011	3.14074e-08	1.07712e-05	9.08443	IDS,	3423
238756_at	-0.888405	-0.165263	-9.54975	3.14244e-08	1.07712e-05	9.08387	GAS2L3	283431
219715_s_at	-0.686756	-0.104922	-9.54814	3.15009e-08	1.07893e-05	9.08139	TDP1	55775
222443_s_at	-0.691751	-0.126165	-9.54095	3.18447e-08	1.08988e-05	9.0703	RBM8B, RBM8A	9939
226217_at	-1.03904	-0.197295	-9.53635	3.20668e-08	1.09666e-05	9.06319	SLC30A7	148867
234942_s_at	-0.672832	-0.163876	-9.52639	3.25531e-08	1.11245e-05	9.04781	DNTTIP1	116092
219758_at	-0.957819	-0.16288	-9.52142	3.27991e-08	1.12002e-05	9.04011	TTC26	79989
201141_at	1.99452	0.320002	9.5199	3.28745e-08	1.12175e-05	9.03777	GPNMB	10457
221887_s_at	0.95163	0.249015	9.5128	3.32298e-08	1.13302e-05	9.02678	WHRN	25861
228238_at	-1.05755	-0.203112	-9.50992	3.33747e-08	1.13711e-05	9.02233	GAS5	60674
90610_at	0.870072	0.126703	9.5032	3.37162e-08	1.14789e-05	9.01192	, LRCH4	4034
202787_s_at	-0.780678	-0.136501	-9.50198	3.37784e-08	1.14914e-05	9.01004	MAPKAPK3	7867
227893_at	1.08156	0.258419	9.50072	3.38432e-08	1.15049e-05	9.00808	LINC00476	100128782
37232_at	-0.984611	-0.195975	-9.49921	3.39206e-08	1.15226e-05	9.00574	KIAA0586	9786
223275_at	-1.58642	-0.307628	-9.49805	3.39803e-08	1.15342e-05	9.00395	PRMT6	55170
231940_at	-0.903402	-0.163387	-9.4962	3.40757e-08	1.15574e-05	9.00108	ZNF529	57711
229692_at	-1.14933	-0.199131	-9.49574	3.40993e-08	1.15574e-05	9.00037
231437_at	-0.775422	-0.172186	-9.49251	3.42668e-08	1.15973e-05	8.99536	SLC35D2	11046
219595_at	-0.774624	-0.212001	-9.49218	3.4284e-08	1.15973e-05	8.99485	ZNF26	7574
204820_s_at	0.7854	0.0561006	9.492	3.42937e-08	1.15973e-05	8.99456	BTN3A3, BTN3A2	10384, 11118
223700_at	-0.894655	-0.202059	-9.49054	3.43697e-08	1.16144e-05	8.9923	MND1	84057
225978_at	-1.03102	-0.291581	-9.48494	3.46626e-08	1.17047e-05	8.98363	RIMKLB	57494
213097_s_at	-0.786985	-0.136449	-9.48397	3.47138e-08	1.17133e-05	8.98212	DNAJC2	27000
1554364_at	-1.06155	-0.110862	-9.48148	3.48451e-08	1.17489e-05	8.97826	PPP2R5C	5527
214472_at	1.39007	0.274167	9.48049	3.48973e-08	1.17578e-05	8.97673	, HIST1H3D	8351
205596_s_at	-0.980248	-0.140884	-9.47844	3.5006e-08	1.17857e-05	8.97355	SMURF2	64750
236514_at	-1.02851	-0.255052	-9.47612	3.51296e-08	1.18185e-05	8.96994	ACOT8	10005
203972_s_at	-1.09933	-0.216751	-9.47419	3.52326e-08	1.18444e-05	8.96695	PEX3	8504
225608_at	0.92448	0.0966362	9.47107	3.53999e-08	1.18919e-05	8.96211	SNX29	92017
213508_at	0.831506	0.122463	9.46976	3.54704e-08	1.19067e-05	8.96008	SPTSSA	171546
204835_at	-0.695113	-0.212971	-9.46926	3.54977e-08	1.19071e-05	8.95929	POLA1	5422
205968_at	0.967164	0.291278	9.4678	3.55762e-08	1.19176e-05	8.95703	KCNS3	3790
222201_s_at	-0.839584	-0.195255	-9.46771	3.55814e-08	1.19176e-05	8.95688	CASP8AP2	9994
221685_s_at	-0.928734	-0.130397	-9.46457	3.5751e-08	1.19656e-05	8.95202	SPDL1	54908
228773_at	1.09313	0.179941	9.46034	3.59818e-08	1.2034e-05	8.94544		100506100
226064_s_at	0.704869	0.262995	9.4575	3.61376e-08	1.20773e-05	8.94102	DGAT2	84649
226530_at	0.726635	0.0722464	9.45554	3.62455e-08	1.21044e-05	8.93798	BMF	90427
242509_at	-1.51381	-0.318897	-9.45383	3.63396e-08	1.21269e-05	8.93533
219888_at	-0.992303	0.0427373	-9.45311	3.63796e-08	1.21286e-05	8.9342	SPAG4	6676
212033_at	-0.647255	-0.162149	-9.45277	3.6398e-08	1.21286e-05	8.93369	RBM25	58517
213532_at	0.835788	0.233059	9.4519	3.64462e-08	1.21358e-05	8.93233	ADAM17	6868
217168_s_at	1.35662	0.262462	9.45078	3.65084e-08	1.21476e-05	8.93059	HERPUD1	9709
204991_s_at	-1.34985	-0.232695	-9.45016	3.65429e-08	1.21479e-05	8.92962	NF2	4771
34408_at	1.34525	0.237958	9.44981	3.65626e-08	1.21479e-05	8.92907	RTN2	6253
214804_at	-0.980241	-0.130272	-9.4484	3.66412e-08	1.21609e-05	8.92688	CENPI	2491
215412_x_at	-0.753926	-0.163734	-9.44767	3.66815e-08	1.21609e-05	8.92575	PMS2P5, PMS2P11, PMS2P6, , PMS2P10, PMS2P2, PMS2P7, PMS2P9
203518_at	0.982422	0.243088	9.44766	3.66821e-08	1.21609e-05	8.92574	LYST	1130
204141_at	-0.994582	-0.124522	-9.44679	3.67306e-08	1.21642e-05	8.92439	TUBB2A	7280
222848_at	-1.50358	-0.259764	-9.44653	3.67455e-08	1.21642e-05	8.92397	CENPK	64105
226784_at	-0.999728	-0.181398	-9.44368	3.6905e-08	1.22081e-05	8.91954	TWISTNB	221830
202681_at	-0.850415	-0.119401	-9.44159	3.70222e-08	1.2236e-05	8.9163	C3orf62, USP4	375341, 7375
238929_at	-1.12698	-0.215624	-9.44123	3.70431e-08	1.2236e-05	8.91573	SRSF8	10929
202286_s_at	1.00894	0.148203	9.43717	3.72722e-08	1.23028e-05	8.90942	TACSTD2	4070
204341_at	1.25871	0.29192	9.43376	3.74663e-08	1.23573e-05	8.90411	TRIM16, TRIM16L	10626, 147166
227486_at	-1.21878	-0.0793091	-9.43331	3.74918e-08	1.23573e-05	8.90341
209490_s_at	0.776892	0.095215	9.43184	3.75761e-08	1.23761e-05	8.90112	PPT2	9374
205895_s_at	-1.07175	-0.215598	-9.42495	3.79729e-08	1.24978e-05	8.89038	NOLC1	9221
1554696_s_at	-0.981103	-0.241551	-9.40646	3.90581e-08	1.28456e-05	8.86157	TYMS	7298
224492_s_at	-0.907977	-0.123975	-9.40585	3.90949e-08	1.28484e-05	8.86061	ZNF627	199692
209905_at	-1.36576	-0.256406	-9.40488	3.91529e-08	1.28582e-05	8.85909	HOXA9	3205, 442920
223540_at	1.28404	0.248131	9.40362	3.9228e-08	1.28736e-05	8.85713	NECTIN4	81607
238887_at	-0.791063	-0.12494	-9.40129	3.93678e-08	1.29101e-05	8.85349
222316_at	-1.49684	-0.273555	-9.39992	3.94499e-08	1.29248e-05	8.85136
65086_at	0.619056	0.0833302	9.39942	3.94802e-08	1.29248e-05	8.85058	YIPF2	78992
1554539_a_at	0.929396	0.219362	9.39913	3.94977e-08	1.29248e-05	8.85013	RHOF	54509
209450_at	-1.33291	-0.238958	-9.39736	3.96045e-08	1.29504e-05	8.84736	OSGEP	55644
238614_x_at	-0.98354	-0.120584	-9.39593	3.96915e-08	1.29696e-05	8.84512	ZNF430	80264
1554264_at	-2.10003	-0.512207	-9.39496	3.97502e-08	1.29794e-05	8.84361	CKAP2	26586
243338_at	-1.02321	-0.182765	-9.39409	3.98029e-08	1.29873e-05	8.84226
218170_at	-0.714948	-0.143599	-9.39094	3.9995e-08	1.30277e-05	8.83733	ISOC1	51015
228204_at	-0.655924	-0.164803	-9.39051	4.00213e-08	1.30277e-05	8.83666
217371_s_at	1.21519	0.18289	9.39029	4.00343e-08	1.30277e-05	8.83633	IL15	3600
230592_at	-0.977803	-0.256368	-9.39018	4.00413e-08	1.30277e-05	8.83615	NSL1	25936
210143_at	1.54819	0.518093	9.38925	4.0098e-08	1.30356e-05	8.8347	ANXA10	11199
222680_s_at	-1.06056	-0.259066	-9.38876	4.01285e-08	1.30356e-05	8.83392	DTL	51514
238785_at	-1.61272	-0.23422	-9.38838	4.01517e-08	1.30356e-05	8.83334
202098_s_at	0.640429	0.0976152	9.38609	4.02921e-08	1.30719e-05	8.82977	PRMT2	3275
213233_s_at	-0.781119	-0.179724	-9.38494	4.03631e-08	1.30856e-05	8.82797	KLHL9	55958
225716_at	-1.14846	-0.294981	-9.38414	4.04126e-08	1.30923e-05	8.82671	BRI3BP	140707
232710_at	-0.945529	-0.275952	-9.37818	4.07827e-08	1.31971e-05	8.81739
214805_at	-0.728935	-0.11589	-9.37764	4.0816e-08	1.31971e-05	8.81656	SNORA48, EIF4A1	652965, 1973
236101_at	0.932181	0.0427447	9.37684	4.08663e-08	1.31971e-05	8.8153	SLC2A9	56606
213092_x_at	-0.665079	-0.125265	-9.37674	4.08724e-08	1.31971e-05	8.81515	DNAJC9	23234
218577_at	-0.942164	-0.181863	-9.3766	4.0881e-08	1.31971e-05	8.81493	LRRC40	55631
218585_s_at	-0.780584	-0.222348	-9.37337	4.10836e-08	1.32531e-05	8.80987	DTL	51514
223152_at	0.915239	0.191383	9.36811	4.14153e-08	1.33506e-05	8.80165	PPP1R12C	54776
238509_at	-0.768666	-0.196351	-9.36725	4.147e-08	1.33588e-05	8.8003
212619_at	-1.44356	-0.235366	-9.36675	4.15014e-08	1.33594e-05	8.79953	NEMP1	23306
229610_at	-1.22849	-0.187692	-9.36578	4.15633e-08	1.33699e-05	8.798	CKAP2L	150468
1560622_at	-0.773577	-0.223319	-9.36326	4.17239e-08	1.3412e-05	8.79406
200804_at	0.634248	0.231341	9.35864	4.20204e-08	1.34978e-05	8.78682	TMBIM6	7009
205046_at	-1.11635	-0.205151	-9.35633	4.21693e-08	1.35361e-05	8.7832	CENPE	1062
211949_s_at	-0.906112	-0.223865	-9.34773	4.27283e-08	1.37058e-05	8.76974	NOLC1	9221
223470_at	-0.952997	-0.249556	-9.34608	4.28367e-08	1.37309e-05	8.76715	PIGM	93183
1554151_at	-1.05691	-0.119458	-9.34465	4.29306e-08	1.37513e-05	8.76491	OGDH	4967
204286_s_at	1.08135	0.255984	9.34168	4.31266e-08	1.38044e-05	8.76025	PMAIP1	5366
212027_at	-0.757292	-0.118806	-9.34063	4.31962e-08	1.38149e-05	8.7586	RBM25	58517
1563259_at	-0.973741	-0.156264	-9.33991	4.32438e-08	1.38149e-05	8.75747
215165_x_at	-1.00537	-0.179256	-9.33941	4.32766e-08	1.38149e-05	8.7567	UMPS	7372
219076_s_at	-0.709342	-0.202134	-9.33935	4.32809e-08	1.38149e-05	8.7566	, PXMP2	5827
201693_s_at	-2.57101	-0.495406	-9.32853	4.40048e-08	1.40361e-05	8.73963	EGR1	1958
207732_s_at	-0.963212	-0.221574	-9.32502	4.4243e-08	1.41022e-05	8.73411	DLG3	1741
217485_x_at	-0.703794	-0.132431	-9.32423	4.42967e-08	1.41094e-05	8.73287
209932_s_at	-1.11738	-0.333793	-9.32341	4.43523e-08	1.41143e-05	8.73159	DUT	1854
210691_s_at	-0.633623	-0.124841	-9.32309	4.4374e-08	1.41143e-05	8.73109	CACYBP, CACYBPP2	27101
203360_s_at	-0.917974	-0.263887	-9.32018	4.45725e-08	1.41675e-05	8.72653	, MYCBP	26292
219532_at	0.757036	0.109489	9.31641	4.48315e-08	1.42322e-05	8.7206	ELOVL4	6785
204133_at	-0.776599	-0.0859802	-9.31631	4.48385e-08	1.42322e-05	8.72044	RRP9	9136
227038_at	-0.904656	-0.206208	-9.31342	4.5038e-08	1.42855e-05	8.7159	SGMS2	166929
235114_x_at	-0.835816	-0.169023	-9.31036	4.52503e-08	1.43429e-05	8.71109	HOOK3	84376
233713_at	-1.5788	-0.283511	-9.30909	4.53386e-08	1.43609e-05	8.7091
242932_at	-1.28596	-0.365842	-9.3069	4.54914e-08	1.43992e-05	8.70566
225446_at	-0.966826	-0.321582	-9.30089	4.59139e-08	1.45228e-05	8.6962	BRWD1	54014
226350_at	-1.11308	-0.200877	-9.30018	4.59644e-08	1.45287e-05	8.69508	CHML	1122
215411_s_at	0.677475	0.158129	9.29798	4.61195e-08	1.45676e-05	8.69163	TRAF3IP2	10758
219324_at	-0.968766	-0.226648	-9.2918	4.65605e-08	1.46967e-05	8.6819	NOL12,	79159
214016_s_at	-1.0045	-0.186828	-9.28846	4.68005e-08	1.47622e-05	8.67664	SFPQ	6421
209504_s_at	0.929056	0.186038	9.28797	4.68356e-08	1.47631e-05	8.67588	PLEKHB1	58473
228305_at	-0.975733	-0.115735	-9.28741	4.68761e-08	1.47654e-05	8.67499	ZNF565	147929
229296_at	1.20038	0.227286	9.28697	4.69079e-08	1.47654e-05	8.6743	LINC01503	100506119
235190_at	-0.88875	-0.186357	-9.2854	4.70216e-08	1.47909e-05	8.67182
227027_at	0.904369	0.0816787	9.28441	4.70928e-08	1.48031e-05	8.67027	GFPT1	2673
215066_at	-1.21615	-0.172156	-9.28299	4.71964e-08	1.48254e-05	8.66803
219043_s_at	-1.15216	-0.174906	-9.27697	4.76359e-08	1.49531e-05	8.65855	PDCL3P5, PDCL3, PDCL3P4, PDCL3P6	79031
238794_at	-1.42589	-0.234077	-9.27529	4.77595e-08	1.49816e-05	8.6559	SFR1	119392
222500_at	-0.762775	-0.104126	-9.27429	4.78329e-08	1.49943e-05	8.65433	PPIL1	51645
1569631_at	-0.722599	-0.178394	-9.26637	4.84207e-08	1.51681e-05	8.64183	NMNAT1,	64802
209191_at	-0.815083	-0.0626081	-9.26382	4.86113e-08	1.52173e-05	8.63782	TUBB6	84617
209605_at	1.05695	0.259998	9.26123	4.8806e-08	1.52678e-05	8.63373	TST	7263
226269_at	-0.986535	-0.245683	-9.25725	4.91065e-08	1.53476e-05	8.62745	GDAP1	54332
224871_at	0.813467	0.184221	9.25695	4.91287e-08	1.53476e-05	8.62699	TPRG1L	127262
238704_at	-1.79244	-0.388119	-9.25138	4.95528e-08	1.54695e-05	8.6182
224903_at	-0.576469	-0.111576	-9.24931	4.97118e-08	1.55085e-05	8.61492	UTP4	84916
222222_s_at	0.75359	0.195484	9.24876	4.97541e-08	1.5511e-05	8.61405	, HOMER3	9454
215269_at	-0.909543	-0.0980942	-9.24579	4.99824e-08	1.55636e-05	8.60937
230467_at	1.19421	0.236489	9.24563	4.99952e-08	1.55636e-05	8.60911	TMEM52	339456
236613_at	-1.38931	-0.36044	-9.24523	5.00256e-08	1.55636e-05	8.60849	RBM25	58517
235130_at	-1.03412	-0.277096	-9.24444	5.00872e-08	1.55687e-05	8.60723	MIR103A2	406896
232158_x_at	-0.818582	-0.0171139	-9.24414	5.01103e-08	1.55687e-05	8.60675	NIPAL1	152519
231954_at	-1.54464	-0.312641	-9.24241	5.02439e-08	1.55995e-05	8.60403	MIR4453	54553, 100616193
219037_at	-1.03028	-0.156139	-9.24063	5.03825e-08	1.56241e-05	8.60121	RRP15	51018
213982_s_at	-1.07039	-0.236503	-9.24035	5.04042e-08	1.56241e-05	8.60077	RABGAP1L	9910
225817_at	0.835044	0.159881	9.24005	5.04278e-08	1.56241e-05	8.60029	CGNL1	84952
212667_at	-0.847937	-0.270553	-9.23963	5.04604e-08	1.56241e-05	8.59963	SPARC	6678
226899_at	1.66046	0.238608	9.23576	5.07632e-08	1.57072e-05	8.59351	UNC5B	219699
224852_at	0.920965	0.169768	9.23426	5.08807e-08	1.57328e-05	8.59115	TTC17	55761
203041_s_at	1.24559	0.274623	9.22523	5.15958e-08	1.59431e-05	8.57687	LAMP2	3920
208668_x_at	-0.769842	-0.140696	-9.22401	5.16939e-08	1.59626e-05	8.57493	HMGN2P41, RPL12P38, HMGN2P17, HMGN2P3, HMGN2P5, HMGN2, HMGN2P6	3151
201755_at	-1.37382	-0.334743	-9.22294	5.1779e-08	1.5978e-05	8.57325	MCM5	4174
219353_at	-1.2198	-0.36574	-9.22125	5.19145e-08	1.6009e-05	8.57058	NHLRC2	374354
231035_s_at	1.4663	0.244676	9.21978	5.20328e-08	1.60346e-05	8.56825
201959_s_at	0.639092	0.0837671	9.21849	5.2137e-08	1.60452e-05	8.5662	MYCBP2	23077
228089_x_at	0.755416	0.140887	9.21804	5.21735e-08	1.60452e-05	8.56548	TMEM179B	374395, 102465448
206582_s_at	0.762171	0.0531004	9.2179	5.21845e-08	1.60452e-05	8.56527	ADGRG1	9289
201594_s_at	-0.760079	-0.112417	-9.21761	5.22083e-08	1.60452e-05	8.5648	PPP4R1	9989
230287_at	0.943921	0.159408	9.21628	5.23153e-08	1.60672e-05	8.56271	SGSM1	129049
201414_s_at	-0.584043	-0.0921915	-9.21529	5.23956e-08	1.60776e-05	8.56114	NAP1L4	4676
222571_at	0.668219	0.0900864	9.21483	5.24335e-08	1.60776e-05	8.5604	ST6GALNAC6	30815
220766_at	-1.0758	-0.212317	-9.21456	5.24552e-08	1.60776e-05	8.55998	BTG4	54766
218408_at	-0.827398	-0.18654	-9.21323	5.25634e-08	1.60999e-05	8.55787	TIMM10	26519
213220_at	0.792721	0.207904	9.20941	5.28745e-08	1.61571e-05	8.55183	BBIP1	92482
1554520_at	-1.04874	-0.114434	-9.2094	5.28754e-08	1.61571e-05	8.55181
230811_at	-0.910623	-0.272809	-9.20919	5.2893e-08	1.61571e-05	8.55148	SPATA33	124045
202455_at	0.984756	0.209863	9.20857	5.29439e-08	1.61571e-05	8.55049	HDAC5	10014
212412_at	-0.694804	-0.120441	-9.2084	5.29574e-08	1.61571e-05	8.55023	PDLIM5	10611
217925_s_at	0.88334	0.116664	9.20833	5.29633e-08	1.61571e-05	8.55012	C6orf106	64771
213552_at	0.879069	0.114922	9.20647	5.3116e-08	1.61907e-05	8.54717	GLCE	26035
224159_x_at	0.561997	0.156922	9.20613	5.31444e-08	1.61907e-05	8.54662	TRIM4	89122
210176_at	-0.842494	-0.168277	-9.20513	5.32268e-08	1.62049e-05	8.54504	TLR1	7096
222126_at	1.62637	0.234457	9.20463	5.3268e-08	1.62066e-05	8.54425	AGFG2	3268
219865_at	-0.658534	-0.204464	-9.20372	5.33425e-08	1.62184e-05	8.54282	LINC00339	29092
213320_at	-0.854044	-0.167555	-9.19987	5.36623e-08	1.63047e-05	8.5367	PRMT3	10196
219178_at	-0.893915	-0.165754	-9.19762	5.38497e-08	1.63508e-05	8.53314	QTRT2	79691
225485_at	-0.909536	-0.195109	-9.19502	5.40671e-08	1.64058e-05	8.52902	CEP41	95681
217640_x_at	-0.98073	-0.152413	-9.19131	5.43785e-08	1.64752e-05	8.52314	SKA1	220134
203827_at	1.50625	0.366927	9.1913	5.43793e-08	1.64752e-05	8.52313	WIPI1	55062
223570_at	-1.09259	-0.260073	-9.191	5.44044e-08	1.64752e-05	8.52265	MCM10	55388
237415_at	1.27903	0.302256	9.18833	5.46308e-08	1.65327e-05	8.51841
218225_at	0.644961	0.158369	9.18571	5.48528e-08	1.65889e-05	8.51426	ECSIT	51295
228181_at	1.45891	0.270496	9.18374	5.50206e-08	1.66286e-05	8.51113	SLC30A1	7779
201479_at	-0.58119	-0.126101	-9.18326	5.50616e-08	1.66299e-05	8.51037	DKC1	1736, 100847052
227940_at	-0.924366	-0.237875	-9.18162	5.52024e-08	1.66614e-05	8.50776		339803
41387_r_at	0.720209	0.147133	9.17793	5.55193e-08	1.67459e-05	8.5019	KDM6B	23135
213117_at	-1.17331	-0.274019	-9.17665	5.56294e-08	1.6768e-05	8.49988	KLHL9	55958
208836_at	0.656997	0.168778	9.17478	5.57914e-08	1.67875e-05	8.4969	ATP1B3, ATP1B3P1	483
201644_at	-0.769348	-0.150019	-9.17469	5.57988e-08	1.67875e-05	8.49677	TSTA3	7264
206777_s_at	-0.8216	-0.137823	-9.17462	5.58049e-08	1.67875e-05	8.49665	CRYBB2, CRYBB2P1	1415, 1416
236668_at	1.165	0.260115	9.17413	5.58473e-08	1.67892e-05	8.49588
228468_at	-0.787171	-0.0500264	-9.17351	5.59011e-08	1.67943e-05	8.49489	MASTL	84930
202588_at	0.858524	0.122613	9.17121	5.61012e-08	1.68378e-05	8.49124	AK1	203
200898_s_at	-0.81584	-0.019083	-9.17099	5.61202e-08	1.68378e-05	8.49089	MGEA5	10724
1557828_a_at	-1.74605	-0.262951	-9.16736	5.64377e-08	1.6922e-05	8.48512
230240_at	1.00571	0.277748	9.16688	5.64798e-08	1.69234e-05	8.48436
1558586_at	1.28227	0.196928	9.16317	5.68065e-08	1.70101e-05	8.47846	ZNF33B	7582
242710_at	0.793421	0.165668	9.16241	5.68732e-08	1.70189e-05	8.47726
243501_at	-0.872024	-0.285742	-9.15989	5.70963e-08	1.70744e-05	8.47325	ATP5F1	515
223181_at	-0.965609	-0.1844	-9.15552	5.74857e-08	1.71796e-05	8.4663	TIMM21	29090
225834_at	-1.52035	-0.272454	-9.15233	5.77719e-08	1.72537e-05	8.46122	FAM72C, FAM72A, FAM72B, FAM72D	554282, 728833, 729533, 653820
202862_at	-0.762685	-0.109586	-9.15168	5.78303e-08	1.72599e-05	8.46018	FAH	2184
228764_s_at	-1.13197	-0.241668	-9.1487	5.80988e-08	1.73286e-05	8.45544	NEDD8-MDP1, , MDP1	145553
235917_at	-0.813062	-0.149408	-9.14697	5.82546e-08	1.73637e-05	8.4527	INIP	58493
218175_at	1.47043	0.227042	9.13787	5.90863e-08	1.76001e-05	8.4382	CCDC92	80212
225967_s_at	-0.763078	-0.158759	-9.13706	5.91608e-08	1.76107e-05	8.43691	C17orf89	284184
236428_at	-0.990117	-0.258906	-9.1325	5.95823e-08	1.77136e-05	8.42965
1556216_s_at	-1.52823	-0.226206	-9.13248	5.95842e-08	1.77136e-05	8.42962
218719_s_at	-1.02843	-0.135177	-9.12865	5.99402e-08	1.78078e-05	8.42352	GINS3	64785
208787_at	-0.633629	-0.156067	-9.12769	6.00299e-08	1.78228e-05	8.42199	MRPL3	11222
228568_at	0.92834	0.167	9.12704	6.00907e-08	1.78292e-05	8.42096	MYZAP	100820829
218766_s_at	-0.91227	-0.188911	-9.12592	6.01953e-08	1.78486e-05	8.41918	WARS2	10352
214662_at	-0.635518	-0.155302	-9.12425	6.03529e-08	1.78734e-05	8.4165	WDR43	23160
218294_s_at	-0.829084	-0.0891142	-9.1242	6.03575e-08	1.78734e-05	8.41642	NUP50	10762
236198_at	2.45604	0.460075	9.12073	6.06844e-08	1.79585e-05	8.4109	LINC01215	101929623
226074_at	0.786539	0.279232	9.11257	6.14612e-08	1.81765e-05	8.39789	PPM1M	132160
1556088_at	-1.2033	-0.346109	-9.11199	6.15175e-08	1.81807e-05	8.39695	RPAIN	84268
210239_at	-0.910982	-0.27458	-9.11152	6.15622e-08	1.81807e-05	8.39621	IRX5	10265
219262_at	-1.31734	-0.298872	-9.11118	6.1595e-08	1.81807e-05	8.39566	SUV39H2	79723
225549_at	-0.6579	-0.0858195	-9.10968	6.17394e-08	1.82115e-05	8.39326	DDX6	1656
201363_s_at	-1.00055	-0.178122	-9.10601	6.20936e-08	1.83041e-05	8.38741	IVNS1ABP	10625
208025_s_at	-1.91993	-0.133293	-9.09896	6.27803e-08	1.84945e-05	8.37616	HMGA2	8091
209440_at	-0.675106	-0.160305	-9.09725	6.29486e-08	1.85321e-05	8.37342	PRPS1	5631
243606_at	1.1365	0.273705	9.09588	6.30831e-08	1.85561e-05	8.37124	NXPE3	91775
204695_at	-1.13325	-0.231536	-9.09559	6.31117e-08	1.85561e-05	8.37077	CDC25A	993
205490_x_at	1.03423	0.329555	9.09093	6.3573e-08	1.8677e-05	8.36332	GJB3	2707
241731_x_at	-1.10071	-0.225406	-9.09061	6.3605e-08	1.8677e-05	8.36281	ZNF440	126070
230039_at	1.06887	0.240097	9.08517	6.41479e-08	1.88242e-05	8.35411
238151_at	1.16225	0.080964	9.0847	6.41948e-08	1.88259e-05	8.35336
227884_at	-1.19957	-0.291899	-9.08364	6.43011e-08	1.88449e-05	8.35167	TAF15,	8148
213103_at	-1.3647	-0.352248	-9.08171	6.4496e-08	1.88898e-05	8.34857	STARD13	90627
217850_at	-0.634184	-0.113537	-9.07978	6.46903e-08	1.89345e-05	8.3455	GNL3	26354
238856_s_at	-1.52063	-0.452243	-9.07602	6.50714e-08	1.90338e-05	8.33948	MIR103A2	406896
229954_at	-1.52922	-0.361453	-9.07441	6.52358e-08	1.90697e-05	8.3369	CHDH	55349
203581_at	0.852837	0.121691	9.07204	6.5478e-08	1.91282e-05	8.33311	RAB4A	5867
218517_at	-0.910634	-0.232836	-9.07032	6.56548e-08	1.91591e-05	8.33035	JADE1	79960
224434_s_at	0.774595	0.149968	9.07019	6.5668e-08	1.91591e-05	8.33015	WDR83	84292
224944_at	-0.904542	-0.184562	-9.06566	6.61348e-08	1.92829e-05	8.3229	TMPO	7112
241900_at	-1.03289	-0.264023	-9.0644	6.62661e-08	1.93088e-05	8.32087
205519_at	-1.48433	-0.428627	-9.06125	6.65928e-08	1.93916e-05	8.31584	WDR76	79968
232184_at	-1.24721	-0.245854	-9.05931	6.6796e-08	1.94383e-05	8.31272	ALS2	57679
209971_x_at	-0.627153	-0.132437	-9.05872	6.68575e-08	1.94437e-05	8.31178	AIMP2	7965
235071_at	-0.838094	-0.198117	-9.05723	6.70142e-08	1.94769e-05	8.30938	WDR92,	116143
219169_s_at	-0.933705	-0.144163	-9.05611	6.71314e-08	1.94985e-05	8.3076	TFB1M	51106
235290_at	-1.61878	-0.428916	-9.05544	6.7202e-08	1.95065e-05	8.30652	ZNF782	158431
220035_at	-1.17664	-0.364909	-9.05107	6.76634e-08	1.96231e-05	8.29952	NUP210	23225
231175_at	1.23564	0.264016	9.05082	6.76901e-08	1.96231e-05	8.29912	BEND6	221336
224693_at	0.90589	0.22781	9.04994	6.77831e-08	1.96287e-05	8.29771	FAM210B	116151
226458_at	-0.964942	-0.169411	-9.04983	6.77956e-08	1.96287e-05	8.29752
204460_s_at	-0.815406	-0.154135	-9.04492	6.83185e-08	1.97675e-05	8.28966	RAD1	5810
81811_at	-0.964338	-0.204329	-9.04396	6.84215e-08	1.97848e-05	8.28812
236423_at	1.14304	0.237901	9.04288	6.85375e-08	1.98057e-05	8.28638
227891_s_at	-1.07864	-0.183304	-9.03999	6.88491e-08	1.98831e-05	8.28174
220144_s_at	-0.962967	-0.162818	-9.03925	6.89285e-08	1.98934e-05	8.28056	ANKEF1	63926
239081_at	-0.866069	-0.132624	-9.03434	6.94617e-08	2.00346e-05	8.27268
214369_s_at	0.742615	0.194028	9.02854	7.00967e-08	2.02049e-05	8.26337	RASGRP2	10235
1556035_s_at	-1.19866	-0.227192	-9.02498	7.04898e-08	2.03054e-05	8.25764	ZNF207	7756, 693217
210139_s_at	-1.07238	-0.247553	-9.02418	7.05787e-08	2.03137e-05	8.25635	PMP22	5376
202468_s_at	-0.744043	-0.150526	-9.02391	7.06081e-08	2.03137e-05	8.25593	CTNNAL1	8727
232716_at	-0.88949	-0.146378	-9.01598	7.14928e-08	2.05482e-05	8.24319
230185_at	-1.05642	-0.192398	-9.0158	7.15135e-08	2.05482e-05	8.24289	THAP9	79725
203438_at	1.4382	0.284292	9.01356	7.17647e-08	2.06074e-05	8.2393	STC2	8614
242037_at	0.946905	0.50608	9.01289	7.18413e-08	2.06164e-05	8.23821	ASPH	444
200645_at	0.600971	0.0896467	9.01112	7.20407e-08	2.06605e-05	8.23537	, GABARAP	11337
209989_at	-1.38122	-0.197123	-9.00933	7.22439e-08	2.06848e-05	8.23249	ZNF268	10795
242655_at	-0.950428	-0.0672759	-9.00931	7.22456e-08	2.06848e-05	8.23247	BARD1	580
202819_s_at	-0.661832	-0.166678	-9.00917	7.22616e-08	2.06848e-05	8.23224	TCEB3	6924
201860_s_at	2.02353	0.266085	9.00858	7.23287e-08	2.0691e-05	8.23129	PLAT	5327
213182_x_at	1.99526	0.383061	9.00613	7.26085e-08	2.07579e-05	8.22734	CDKN1C	1028
209885_at	0.666489	0.064777	9.00466	7.27759e-08	2.07883e-05	8.22498	RHOD	29984
1565951_s_at	-1.02083	-0.21523	-9.0044	7.2806e-08	2.07883e-05	8.22456	CHML	1122
203755_at	-1.01534	-0.142021	-9.00051	7.32527e-08	2.08884e-05	8.2183	BUB1B	701
1555058_a_at	-0.787844	-0.176472	-9.00017	7.32919e-08	2.08884e-05	8.21775	LPGAT1	9926
224233_s_at	-0.638437	-0.128181	-9.00015	7.32945e-08	2.08884e-05	8.21772	MSTO2P, MSTO1	55154
241702_at	-0.859384	-0.113901	-8.996	7.37744e-08	2.1012e-05	8.21104
222666_s_at	-0.65319	-0.111551	-8.99205	7.42345e-08	2.11298e-05	8.20468	RCL1	10171
204228_at	-0.684936	-0.176273	-8.98874	7.46216e-08	2.12267e-05	8.19935	PPIH	10465
201169_s_at	2.01655	0.441263	8.98816	7.46895e-08	2.12308e-05	8.19842	BHLHE40	8553
209240_at	0.633109	0.0956884	8.98783	7.47294e-08	2.12308e-05	8.19788	OGT	8473
221471_at	0.594501	0.125922	8.98564	7.4987e-08	2.12793e-05	8.19435	SERINC3	10955
212461_at	-0.704535	-0.263448	-8.98558	7.49935e-08	2.12793e-05	8.19427	AZIN1	51582
207039_at	0.689772	0.0961607	8.98261	7.53459e-08	2.13659e-05	8.18947	CDKN2A	1029
203389_at	0.744321	0.20886	8.97684	7.6034e-08	2.15476e-05	8.18016	KIF3C	3797
228180_at	-0.911518	-0.211932	-8.97579	7.61588e-08	2.15696e-05	8.17849
208493_at	-0.705405	-0.113823	-8.9749	7.62657e-08	2.15864e-05	8.17705	HOXA11	3207
205796_at	-1.12301	-0.271127	-8.97349	7.64358e-08	2.16211e-05	8.17477	TCP11L1	55346
223133_at	-0.973154	-0.202649	-8.97291	7.65052e-08	2.16273e-05	8.17384	TMEM14B	81853
228075_x_at	-0.788157	-0.105403	-8.96958	7.69089e-08	2.17279e-05	8.16846	TFB1M	51106
224780_at	0.997571	0.23154	8.96835	7.70581e-08	2.17565e-05	8.16647	RBM17	84991
218078_s_at	0.668717	0.113852	8.96539	7.74181e-08	2.18446e-05	8.1617	ZDHHC3	51304
235289_at	-0.868003	-0.276149	-8.96196	7.78382e-08	2.19495e-05	8.15616	EIF5A2	56648
239792_at	-0.820776	-0.102535	-8.96152	7.78926e-08	2.19513e-05	8.15545	UBL7-AS1	440288
212455_at	-0.665249	-0.141388	-8.95781	7.8349e-08	2.20662e-05	8.14947	YTHDC1	91746
1560792_at	-1.11179	-0.141447	-8.95628	7.85382e-08	2.21048e-05	8.147	IER5	51278
232063_x_at	-1.28015	-0.283887	-8.95581	7.85968e-08	2.21048e-05	8.14624
227904_at	-0.687967	-0.134204	-8.95553	7.86318e-08	2.21048e-05	8.14578	AZI2	64343
222270_at	-1.44467	-0.386503	-8.95354	7.88796e-08	2.21608e-05	8.14256	PPP4R3B	57223
202918_s_at	-1.04671	-0.157597	-8.95137	7.91497e-08	2.22229e-05	8.13906	MOB4, HSPE1-MOB4	25843, 100529241
204139_x_at	0.807698	0.157268	8.94929	7.94096e-08	2.22821e-05	8.13571	MZF1	7593
244779_at	-0.820929	-0.248559	-8.94871	7.94833e-08	2.22891e-05	8.13476	ZDHHC2	51201
222735_at	0.845561	0.200951	8.94746	7.96402e-08	2.23193e-05	8.13274	TMEM38B	55151
226990_at	-0.741755	-0.229508	-8.94498	7.99529e-08	2.23931e-05	8.12873	CAPRIN1	4076
202679_at	1.27025	0.315202	8.94288	8.02184e-08	2.24537e-05	8.12534	NPC1	4864
208264_s_at	-0.899383	-0.202364	-8.9399	8.0597e-08	2.25458e-05	8.12052	EIF3J	8669
239433_at	1.22802	0.307731	8.93229	8.1572e-08	2.27846e-05	8.10821	LRRC8E	80131
207338_s_at	-1.25692	-0.149871	-8.93218	8.15857e-08	2.27846e-05	8.10804	ZNF200	7752
208978_at	0.828512	0.121453	8.93172	8.16455e-08	2.27846e-05	8.10729	CRIP2	1397
214816_x_at	-1.00348	-0.186143	-8.93167	8.16511e-08	2.27846e-05	8.10722	FAAP24	91442
205280_at	1.01822	0.0512266	8.92755	8.21852e-08	2.29173e-05	8.10055	GLRB	2743
206931_at	-1.22255	-0.295283	-8.92722	8.22276e-08	2.29173e-05	8.10002	ZNF141	7700
227192_at	0.729146	0.0417485	8.92611	8.2373e-08	2.29438e-05	8.09821	PRRT2, PAGR1	112476, 79447
204812_at	-0.755626	-0.137105	-8.92476	8.25492e-08	2.29788e-05	8.09602	ZW10	9183
226887_at	-0.989562	-0.179813	-8.92406	8.26396e-08	2.29899e-05	8.0949
205135_s_at	-0.780835	-0.151523	-8.92271	8.28164e-08	2.3025e-05	8.09272	NUFIP1, NUFIP1P	26747
225328_at	1.42847	0.124032	8.91946	8.3244e-08	2.31298e-05	8.08744	FBXO32	114907
31846_at	0.567623	0.0876504	8.91735	8.35222e-08	2.31929e-05	8.08403	RHOD	29984
214874_at	-0.835165	-0.31157	-8.91257	8.41571e-08	2.33391e-05	8.07628	PKP4	8502
211712_s_at	1.83234	0.108786	8.9124	8.41794e-08	2.33391e-05	8.07601	ANXA9	8416
218355_at	-0.893973	-0.140085	-8.91222	8.42026e-08	2.33391e-05	8.07573	KIF4A	24137
226630_at	-0.957025	-0.137741	-8.91157	8.42891e-08	2.33448e-05	8.07468	MIS18BP1	55320
224517_at	-0.763218	-0.23802	-8.91101	8.43645e-08	2.33448e-05	8.07376
205584_at	-1.3594	-0.318936	-8.91054	8.44277e-08	2.33448e-05	8.07299	ALG13	79868
226542_at	1.29566	0.29261	8.91053	8.44286e-08	2.33448e-05	8.07298	RNF24	11237
241908_at	0.846234	0.261199	8.90826	8.47332e-08	2.34148e-05	8.0693	BROX	148362
233999_s_at	-1.42786	-0.209227	-8.90398	8.53095e-08	2.35597e-05	8.06236	TTC26	79989
209921_at	1.03451	0.358335	8.90354	8.53687e-08	2.35618e-05	8.06165	SLC7A11	23657
207156_at	0.97464	0.17828	8.90132	8.56698e-08	2.36244e-05	8.05805	HIST1H2AG	8969
226073_at	-0.703175	-0.128775	-8.9011	8.56996e-08	2.36244e-05	8.05769	TMEM218	219854
235850_at	-1.10076	-0.217957	-8.90068	8.57568e-08	2.36246e-05	8.05701	FAM162A	26355
238044_at	1.78095	0.43758	8.90033	8.58041e-08	2.36246e-05	8.05644
200729_s_at	-0.674472	-0.127869	-8.89893	8.59947e-08	2.36628e-05	8.05417	ACTR2	10097
223147_s_at	-0.857624	-0.237767	-8.89707	8.62477e-08	2.3718e-05	8.05116	WDR33	55339
236981_at	1.54287	0.375459	8.88742	8.75778e-08	2.40672e-05	8.0355	C17orf99	100141515
206613_s_at	-0.733606	-0.0319832	-8.8871	8.76232e-08	2.40672e-05	8.03497	TAF1A	9015
206686_at	-1.27654	-0.13177	-8.88496	8.7921e-08	2.41344e-05	8.0315	PDK1	5163
204457_s_at	0.885464	0.239351	8.88449	8.79867e-08	2.41379e-05	8.03073	GAS1	2619
203316_s_at	-0.585265	-0.117285	-8.88257	8.82541e-08	2.41966e-05	8.02763	SNRPE, SNRPEP4, SNRPEP2	6635
205530_at	0.788432	0.134457	8.88154	8.83986e-08	2.42217e-05	8.02595	ETFDH	2110
239026_x_at	0.716548	0.126678	8.87919	8.87297e-08	2.42978e-05	8.02212	AGAP3	116988
228088_at	-0.680364	-0.159728	-8.8784	8.884e-08	2.43133e-05	8.02085	SESTD1	91404
1560271_at	-1.02571	-0.271409	-8.87759	8.89556e-08	2.43303e-05	8.01952
1554246_at	1.01795	0.238031	8.87652	8.91062e-08	2.43569e-05	8.01779	C1orf210	149466
202043_s_at	-0.581419	-0.178751	-8.87263	8.96579e-08	2.44929e-05	8.01147	SMS,	6611
209724_s_at	-0.961977	-0.176188	-8.87124	8.98563e-08	2.45324e-05	8.00921	ZBTB14	7541
201428_at	1.26208	0.290251	8.8701	9.00185e-08	2.45373e-05	8.00736	CLDN4	1364
202532_s_at	-0.75046	-0.206067	-8.86963	9.00863e-08	2.45373e-05	8.00659	DHFR	1719
226663_at	0.936584	0.0457981	8.86927	9.0138e-08	2.45373e-05	8.00601	ANKRD10-IT1
218932_at	-0.753073	-0.124378	-8.86923	9.01439e-08	2.45373e-05	8.00594	ZNHIT6	54680
214502_at	1.08893	0.298583	8.86923	9.01439e-08	2.45373e-05	8.00594
227256_at	1.33936	0.246712	8.86745	9.03989e-08	2.4592e-05	8.00305	USP31,	57478
244025_at	1.19181	0.299065	8.8663	9.05636e-08	2.46221e-05	8.00118	ITPRIP	85450
243808_at	-1.06344	-0.225436	-8.86541	9.06925e-08	2.46381e-05	7.99973
202584_at	-0.74111	-0.119246	-8.86514	9.0731e-08	2.46381e-05	7.99929	NFX1	4799
229517_at	0.668361	0.0667207	8.8629	9.10551e-08	2.47114e-05	7.99564	PTPDC1	138639
214755_at	1.52099	0.476724	8.86159	9.12443e-08	2.4748e-05	7.99352	UAP1L1	91373
225836_s_at	-0.771358	-0.134115	-8.86066	9.13794e-08	2.47698e-05	7.99201	RHNO1	83695
210766_s_at	-0.659	-0.145332	-8.86004	9.14699e-08	2.47796e-05	7.99099	CSE1L	1434
213913_s_at	-1.47338	-0.247952	-8.85898	9.16243e-08	2.48066e-05	7.98927	TBC1D30	23329
239252_at	-1.07601	-0.297066	-8.8562	9.20298e-08	2.49016e-05	7.98475	COX7B	1349
228211_at	-0.910478	-0.229089	-8.84979	9.29719e-08	2.51416e-05	7.97432	ERCC6L2	375748
212184_s_at	0.755764	0.126469	8.84669	9.34315e-08	2.52508e-05	7.96927	TAB2	23118
53202_at	-1.25564	-0.231091	-8.84401	9.38312e-08	2.53297e-05	7.9649	C7orf25,	79020
240259_at	-1.267	-0.270125	-8.84399	9.38346e-08	2.53297e-05	7.96487	FLRT2	23768
205788_s_at	0.597098	0.128075	8.84262	9.40387e-08	2.53697e-05	7.96264	ZC3H11B, ZC3H11A	441155, 9877
214764_at	-0.875804	-0.271865	-8.84077	9.4317e-08	2.54175e-05	7.95962	RRP15	51018
201450_s_at	-1.05527	-0.193587	-8.84053	9.43526e-08	2.54175e-05	7.95923	TIA1	7072
219496_at	-1.44208	-0.241368	-8.84032	9.43833e-08	2.54175e-05	7.9589	SOWAHC	65124
230306_at	-0.679645	-0.182802	-8.83643	9.49708e-08	2.55605e-05	7.95255	VPS26B	112936
210859_x_at	0.897703	0.254802	8.83138	9.57372e-08	2.57516e-05	7.94432	, CLN3	1201
209505_at	1.24854	0.292671	8.83026	9.59076e-08	2.57583e-05	7.9425	NR2F1	7025
211750_x_at	-0.659566	-0.0958105	-8.83016	9.5924e-08	2.57583e-05	7.94232	TUBA1C	84790
204235_s_at	1.83836	0.354081	8.83002	9.59451e-08	2.57583e-05	7.9421	GULP1	51454
218466_at	1.14274	0.293531	8.82973	9.59886e-08	2.57583e-05	7.94163	TBC1D17	79735, 100616314
209375_at	-1.04819	-0.218259	-8.82427	9.68272e-08	2.59472e-05	7.93273	XPC	7508
242918_at	-1.22703	-0.434017	-8.82411	9.68533e-08	2.59472e-05	7.93245	NASP	4678
223824_at	-0.967155	-0.207019	-8.82404	9.68637e-08	2.59472e-05	7.93234	RNLS	55328
215243_s_at	1.03517	0.269276	8.82267	9.70755e-08	2.59744e-05	7.93011	GJB3	2707
226242_at	-1.13289	-0.254993	-8.82264	9.70795e-08	2.59744e-05	7.93007	C1orf131	128061
209018_s_at	0.770987	0.237452	8.81952	9.75637e-08	2.60886e-05	7.92497	PINK1	65018, 102464833
208758_at	-0.645398	-0.108777	-8.81752	9.78761e-08	2.61568e-05	7.9217	ATIC	471
235926_at	-0.708356	-0.188677	-8.81585	9.81357e-08	2.62107e-05	7.91899	ANAPC5	51433
201067_at	-1.30797	-0.257207	-8.8115	9.88201e-08	2.6378e-05	7.91187	PSMC2	5701
1568699_at	0.827301	0.223104	8.80916	9.91898e-08	2.64612e-05	7.90805	IFT43	112752
231312_at	-0.780617	-0.0420414	-8.80535	9.97944e-08	2.66069e-05	7.90183
208290_s_at	-1.08473	-0.205661	-8.80436	9.99518e-08	2.66332e-05	7.90022	EIF5	1983
235025_at	-1.22489	-0.269255	-8.80254	1.00243e-07	2.66951e-05	7.89724	WDR89	112840
213009_s_at	0.569072	0.106335	8.80101	1.00488e-07	2.67448e-05	7.89474	TRIM37	4591
218712_at	-0.647091	-0.103676	-8.79938	1.00749e-07	2.67987e-05	7.89208	C1orf109	54955
209846_s_at	0.877606	0.0759094	8.79599	1.01296e-07	2.69284e-05	7.88654	BTN3A2	11118
1553768_a_at	-1.03653	-0.162421	-8.79553	1.01371e-07	2.69326e-05	7.88578	DCBLD1	285761
218886_at	-0.895568	-0.150591	-8.7941	1.01603e-07	2.69784e-05	7.88344	PAK1IP1	55003
1554158_at	-0.911764	-0.138348	-8.79163	1.02005e-07	2.70692e-05	7.8794	ZMYND11	10771
219072_at	-0.882401	-0.191708	-8.78752	1.02677e-07	2.72317e-05	7.87268	BCL7C	9274
209766_at	-0.905193	-0.122742	-8.78705	1.02754e-07	2.72364e-05	7.87191	PRDX3	10935
208869_s_at	0.828217	0.217254	8.78514	1.03068e-07	2.73037e-05	7.86879	GABARAPL1	23710
212282_at	-0.664953	-0.1704	-8.78258	1.03491e-07	2.73997e-05	7.8646	TMEM97	27346
222931_s_at	-0.991548	-0.231872	-8.77987	1.0394e-07	2.75027e-05	7.86016	THNSL1	79896
203362_s_at	-1.06352	-0.179894	-8.77508	1.04739e-07	2.76979e-05	7.85232	MAD2L1	4085
218735_s_at	-1.09386	-0.215979	-8.77413	1.04899e-07	2.77241e-05	7.85076	ZNF544	27300
203384_s_at	-0.767386	-0.140148	-8.77349	1.05006e-07	2.77362e-05	7.84972	GOLGA1	2800
202795_x_at	0.869519	0.238508	8.77057	1.05498e-07	2.78501e-05	7.84493	TRIOBP	11078
211628_x_at	0.608992	0.159147	8.76895	1.05772e-07	2.79061e-05	7.84228	FTH1P5
215357_s_at	-0.91362	-0.201011	-8.76769	1.05985e-07	2.79461e-05	7.84022	POLDIP3	84271
239138_at	-1.13272	-0.22944	-8.76393	1.06625e-07	2.80986e-05	7.83405	NAA50	80218
241353_s_at	1.16571	0.334475	8.76133	1.0707e-07	2.81996e-05	7.82979
221712_s_at	-0.657899	-0.147292	-8.75879	1.07507e-07	2.82983e-05	7.82562	WDR74	54663
231269_at	-0.826688	-0.235138	-8.75675	1.07858e-07	2.83741e-05	7.82229	ASCC3	10973
205486_at	1.0431	0.0903615	8.75564	1.0805e-07	2.84082e-05	7.82046	TESK2	10420
205296_at	-1.19377	-0.231546	-8.75528	1.08112e-07	2.84082e-05	7.81987	RBL1	5933
229838_at	0.700547	0.168791	8.75409	1.08318e-07	2.84381e-05	7.81793	NUCB2	4925, 105376575
212026_s_at	-0.792592	-0.149706	-8.7539	1.08351e-07	2.84381e-05	7.81761	EXOC7	23265
227187_at	-0.76336	-0.0842493	-8.74961	1.09099e-07	2.86179e-05	7.81057	CBLL1	79872
219231_at	-0.880059	-0.16847	-8.74579	1.09769e-07	2.87772e-05	7.8043	TGS1	96764
228009_x_at	-0.85611	-0.140246	-8.74142	1.10541e-07	2.89629e-05	7.79712	ZNRD1,	30834
228493_at	-0.812361	-0.238328	-8.73989	1.10813e-07	2.90173e-05	7.79461	NKAP	79576
202705_at	-0.819312	-0.160844	-8.73549	1.11598e-07	2.92061e-05	7.78738	CCNB2	9133
221826_at	-0.746113	-0.0797651	-8.73393	1.11877e-07	2.92622e-05	7.78483	ANGEL2	90806
218558_s_at	-0.854942	-0.146782	-8.731	1.12404e-07	2.93832e-05	7.78002	MRPL39	54148
222946_s_at	-0.754296	-0.133294	-8.72798	1.1295e-07	2.95031e-05	7.77505	AUNIP	79000
225527_at	0.764855	0.067785	8.72775	1.12992e-07	2.95031e-05	7.77467	CEBPG	1054
231973_s_at	0.684135	0.107118	8.72593	1.13323e-07	2.95659e-05	7.77168	, ANAPC1	64682
213338_at	1.20174	0.382445	8.72571	1.13363e-07	2.95659e-05	7.77132	TMEM158	25907
228425_at	1.44864	0.426975	8.72375	1.13721e-07	2.96424e-05	7.76809	PAX8-AS1	654433
201017_at	-0.882115	-0.208628	-8.72296	1.13865e-07	2.96629e-05	7.76679	EIF1AX	1964
226358_at	0.7871	0.0607639	8.72208	1.14027e-07	2.9688e-05	7.76534	APH1B	83464
235230_at	-1.03718	-0.178567	-8.71679	1.14998e-07	2.99196e-05	7.75665	PLCXD2	257068
1553391_at	1.35712	0.220884	8.71652	1.15048e-07	2.99196e-05	7.75621	CXorf58	254158
203830_at	-0.709365	-0.153758	-8.71279	1.15741e-07	3.00801e-05	7.75006	C17orf75	64149
228040_at	-1.03851	-0.197469	-8.71248	1.15798e-07	3.00801e-05	7.74956	GLIDR,	389741
202138_x_at	-0.613387	-0.129881	-8.7116	1.15963e-07	3.01058e-05	7.7481	AIMP2	7965
222748_s_at	-1.04974	-0.168283	-8.70942	1.16369e-07	3.01789e-05	7.74452	TXNL4B	54957
1555775_a_at	-0.880094	-0.105026	-8.70938	1.16377e-07	3.01789e-05	7.74445	ZAR1	326340
244524_at	1.06211	0.195974	8.70768	1.16695e-07	3.02441e-05	7.74166	PAX8-AS1	654433
204266_s_at	0.940004	0.190644	8.70552	1.171e-07	3.0332e-05	7.73811	CHKA	1119
228455_at	-1.17044	-0.328361	-8.70289	1.17597e-07	3.04433e-05	7.73377
226455_at	-0.656607	-0.132516	-8.69887	1.1836e-07	3.06235e-05	7.72715	CREB3L4	148327
203378_at	-2.05089	-0.391321	-8.69522	1.19057e-07	3.07863e-05	7.72114	PCF11,	51585
229396_at	1.50079	0.395359	8.69439	1.19217e-07	3.08101e-05	7.71976	OVOL1	5017
201267_s_at	-0.621957	-0.106768	-8.69396	1.193e-07	3.08139e-05	7.71905	PSMC3	5702
202490_at	-0.993636	-0.319507	-8.69317	1.19451e-07	3.08355e-05	7.71776	IKBKAP	8518
221566_s_at	-0.698347	-0.0724249	-8.69262	1.19556e-07	3.08452e-05	7.71685	NOL3	8996
205091_x_at	-0.839512	-0.131777	-8.69165	1.19743e-07	3.08759e-05	7.71526	RECQL,	5965
207117_at	1.42561	0.206159	8.68761	1.20525e-07	3.10599e-05	7.70859	ZNF117	51351
202713_s_at	-0.794318	-0.156406	-8.68701	1.20641e-07	3.10721e-05	7.70761	KIAA0391,	9692
222479_s_at	-0.877021	-0.195893	-8.68384	1.2126e-07	3.12138e-05	7.70237	DYNC1LI1	51143
1555960_at	-0.875403	-0.0731877	-8.68302	1.2142e-07	3.12373e-05	7.70102
209067_s_at	-0.576547	-0.161274	-8.6803	1.21952e-07	3.13394e-05	7.69654	HNRNPDL	9987
213075_at	1.43625	0.173548	8.68029	1.21954e-07	3.13394e-05	7.69652	OLFML2A	169611
202257_s_at	-0.714266	-0.152527	-8.67849	1.22308e-07	3.13807e-05	7.69355	CD2BP2	10421
232524_x_at	-0.792423	-0.152878	-8.67847	1.22312e-07	3.13807e-05	7.69352	ANAPC4	29945
210178_x_at	-0.9198	-0.228353	-8.67842	1.22322e-07	3.13807e-05	7.69344	SRSF10	10772
226574_at	-0.988941	-0.190309	-8.67729	1.22545e-07	3.14168e-05	7.69157	PSPC1P1, PSPC1	55269
231929_at	-1.27815	-0.27932	-8.67701	1.22601e-07	3.14168e-05	7.69111	IKZF2	22807
227165_at	-0.678173	-0.135219	-8.67568	1.22863e-07	3.14662e-05	7.68892	SKA3	221150
222223_s_at	1.2221	0.218648	8.67445	1.23108e-07	3.15111e-05	7.68688	IL36RN	26525
204187_at	1.30713	0.318465	8.67378	1.2324e-07	3.15272e-05	7.68579	GMPR	2766
229519_at	-0.88937	-0.185963	-8.67326	1.23343e-07	3.15359e-05	7.68493	FXR1	8087
226059_at	-0.718317	-0.104009	-8.67221	1.23552e-07	3.15717e-05	7.68319	TOMM40L	84134, 100847090
219177_at	-0.848955	-0.114982	-8.67093	1.23808e-07	3.16192e-05	7.68108	BRIX1	55299
223089_at	-1.09128	-0.197135	-8.67035	1.23925e-07	3.16252e-05	7.68011	VEZT	55591
200928_s_at	-1.17758	-0.281465	-8.67012	1.2397e-07	3.16252e-05	7.67973	RAB14	51552
201413_at	0.616998	0.105026	8.66386	1.25228e-07	3.19282e-05	7.66939	HSD17B4	3295
209311_at	0.793932	0.101573	8.66129	1.25748e-07	3.20428e-05	7.66515	BCL2L2	599
210563_x_at	-0.881669	-0.172772	-8.66064	1.25881e-07	3.20483e-05	7.66408	CFLAR	8837
243016_at	-1.08243	-0.22536	-8.66049	1.25911e-07	3.20483e-05	7.66383
229059_at	-0.956357	-0.154701	-8.65937	1.26137e-07	3.20713e-05	7.66199	FAM225A	286333
227054_at	-1.14522	-0.241228	-8.65935	1.26142e-07	3.20713e-05	7.66195	EEF1AKMT1	221143
227221_at	0.807406	0.0912184	8.65545	1.26939e-07	3.2256e-05	7.6555	ZMAT3	64393
1553957_at	-0.843333	-0.136048	-8.65506	1.27018e-07	3.22579e-05	7.65487	ZNF564,	163050
227164_at	-1.69381	-0.403581	-8.65172	1.27706e-07	3.24116e-05	7.64934	SRSF1	6426
205012_s_at	0.611031	0.115646	8.65143	1.27766e-07	3.24116e-05	7.64886	HAGH	3029
219294_at	-0.985593	-0.204917	-8.64659	1.28768e-07	3.26476e-05	7.64086	CENPQ	55166
239010_at	0.996773	0.211887	8.64286	1.29545e-07	3.28226e-05	7.63469
1554411_at	-1.22005	-0.258014	-8.64259	1.29602e-07	3.28226e-05	7.63424	CTNNB1	1499
239863_at	-0.849164	-0.233241	-8.64101	1.29934e-07	3.28883e-05	7.63163
1558942_at	-1.04245	-0.2199	-8.63826	1.30512e-07	3.30162e-05	7.62708	ZNF765	91661
230165_at	-1.04042	-0.206156	-8.63319	1.31586e-07	3.32657e-05	7.61869	SGO2	151246
1552287_s_at	-1.43415	-0.236327	-8.63292	1.31644e-07	3.32657e-05	7.61823	AFG3L1P	172
211774_s_at	-0.836555	-0.170264	-8.63152	1.31941e-07	3.33222e-05	7.61593	MMACHC	25974
201084_s_at	-0.657045	-0.161971	-8.6258	1.33169e-07	3.36137e-05	7.60644	BCLAF1	9774
230139_at	-0.919861	-0.280543	-8.62511	1.33317e-07	3.36324e-05	7.6053
225272_at	0.657677	0.14406	8.62143	1.34114e-07	3.38146e-05	7.5992	SAT2	112483
236622_at	-0.985694	-0.261304	-8.61835	1.34784e-07	3.39646e-05	7.5941	PIGM	93183
231166_at	1.21679	0.196814	8.61727	1.3502e-07	3.40053e-05	7.59231	GPR155	151556
230580_at	1.00799	0.305428	8.6149	1.3554e-07	3.41173e-05	7.58837
227176_at	0.808165	0.0860358	8.61212	1.3615e-07	3.4252e-05	7.58377	SLC2A13	114134
212030_at	-0.786367	-0.170936	-8.60685	1.37317e-07	3.45264e-05	7.57504	RBM25	58517
222380_s_at	-1.04303	-0.266252	-8.60366	1.3803e-07	3.46866e-05	7.56973
212708_at	0.94954	0.136447	8.59945	1.38974e-07	3.49044e-05	7.56275	MSL1	339287
208353_x_at	0.562348	0.135812	8.59745	1.39424e-07	3.49983e-05	7.55944	ANK1	286
230711_at	0.806789	0.198789	8.59033	1.41044e-07	3.53855e-05	7.54761
209355_s_at	1.61572	0.37147	8.58922	1.41298e-07	3.54296e-05	7.54576	PLPP3	8613
226306_at	0.646057	0.215523	8.58716	1.41772e-07	3.55288e-05	7.54234	C6orf1	221491
238015_at	-0.739753	-0.133043	-8.58661	1.41898e-07	3.55407e-05	7.54143	C4orf46	201725
212334_at	0.784601	0.199512	8.5817	1.43033e-07	3.58054e-05	7.53327	GNS	2799
232270_at	-1.19018	-0.36273	-8.57952	1.4354e-07	3.59124e-05	7.52965	C9orf3	84909, 407012
219204_s_at	-1.06029	-0.21188	-8.57865	1.43745e-07	3.5944e-05	7.52819	SRR	63826
229236_s_at	-0.829494	-0.143078	-8.57572	1.4443e-07	3.60955e-05	7.52332	SFXN4	119559
226661_at	-1.0703	-0.212503	-8.57499	1.44599e-07	3.6118e-05	7.52212	CDCA2	157313
221580_s_at	-0.717127	-0.164669	-8.57389	1.44859e-07	3.61481e-05	7.52028	TAF1D	79101, 100302240
1558102_at	-1.03161	-0.221385	-8.57381	1.44879e-07	3.61481e-05	7.52014		50810
232839_at	-1.50547	-0.479854	-8.57301	1.45066e-07	3.61748e-05	7.51882	STK24-AS1
221513_s_at	-0.835712	-0.162531	-8.57265	1.4515e-07	3.6176e-05	7.51822	UTP14C, UTP14A	9724, 10813
239482_x_at	-0.926129	-0.180906	-8.57061	1.45633e-07	3.62765e-05	7.51482	ZNF708	7562
209754_s_at	-1.33497	-0.279623	-8.56842	1.46152e-07	3.63858e-05	7.51118	TMPO	7112
205637_s_at	0.847393	0.0865948	8.56766	1.46333e-07	3.64064e-05	7.50991	SH3GL3	6457
236027_at	-1.18555	-0.255502	-8.56739	1.46397e-07	3.64064e-05	7.50946	SFR1	119392
203805_s_at	-1.37365	-0.278788	-8.56706	1.46475e-07	3.64064e-05	7.50892	FANCA	2175
1568813_at	-1.23611	-0.309676	-8.56648	1.46614e-07	3.64211e-05	7.50795	SLC16A1-AS1	100506392
225890_at	-0.766066	-0.154779	-8.56555	1.46834e-07	3.64559e-05	7.50641	MGME1	92667
223146_at	-1.01091	-0.155878	-8.56376	1.47264e-07	3.65427e-05	7.50342	WDR33	55339
203682_s_at	-0.847134	-0.192681	-8.56123	1.4787e-07	3.66732e-05	7.49921	IVD	3712
215772_x_at	-0.794682	-0.250234	-8.56087	1.47957e-07	3.66746e-05	7.49861	SUCLG2	8801
207838_x_at	0.909612	0.172451	8.56047	1.48053e-07	3.6678e-05	7.49794	PBXIP1	57326
235502_at	-0.875433	-0.125741	-8.56014	1.48132e-07	3.6678e-05	7.4974	PPP2CA	5515
222425_s_at	-0.630722	-0.128549	-8.55594	1.49146e-07	3.69091e-05	7.49041	POLDIP2	26073
213836_s_at	1.35452	0.349749	8.55404	1.49608e-07	3.70033e-05	7.48724	WIPI1	55062
227266_s_at	2.01953	0.372704	8.55289	1.49888e-07	3.70524e-05	7.48533	FYB	2533
232094_at	-1.46064	-0.343331	-8.54911	1.50814e-07	3.72587e-05	7.47902	KATNBL1	79768
223589_at	-1.01763	-0.191131	-8.54871	1.5091e-07	3.72587e-05	7.47837	ZNF416	55659
236170_x_at	-1.37627	-0.291907	-8.54848	1.50969e-07	3.72587e-05	7.47797		101930085
228045_at	-1.26384	-0.376731	-8.54383	1.52116e-07	3.75215e-05	7.47022	SUGT1	10910
227560_at	-1.02256	-0.286507	-8.53986	1.53101e-07	3.77439e-05	7.46361	SFXN2	118980
230710_at	-1.02637	0.0781527	-8.53882	1.53362e-07	3.77879e-05	7.46186	MIR210, MIR210HG	406992
225429_at	-0.657824	-0.249043	-8.53713	1.53784e-07	3.78713e-05	7.45905	PPP6C	5537
222982_x_at	0.655267	0.160862	8.53675	1.53879e-07	3.78732e-05	7.45842	SLC38A2	54407
227161_at	-1.01942	-0.153693	-8.53643	1.53958e-07	3.78732e-05	7.45789	NOM1	64434
228155_at	1.5791	0.298581	8.53534	1.54233e-07	3.79204e-05	7.45606	FAM213A	84293
237768_x_at	-0.672806	-0.172254	-8.533	1.54821e-07	3.80329e-05	7.45217
238599_at	-1.04208	-0.244493	-8.53286	1.54858e-07	3.80329e-05	7.45192	IRAK1BP1	134728
228216_at	-0.865776	-0.180572	-8.53171	1.55148e-07	3.80658e-05	7.45	ZBTB37	84614
219094_at	-1.23308	-0.264403	-8.53166	1.55159e-07	3.80658e-05	7.44993	ARMC8	25852
221696_s_at	-0.782745	-0.100376	-8.53079	1.55379e-07	3.80991e-05	7.44848	STYK1	55359
200757_s_at	0.711223	0.128517	8.52941	1.5573e-07	3.81646e-05	7.44617	CALU	813
206829_x_at	-0.87413	-0.0994051	-8.52874	1.55901e-07	3.8186e-05	7.44505	ZNF430	80264
200715_x_at	0.711787	0.127585	8.52833	1.56004e-07	3.81906e-05	7.44437	SNORD35A, RPL13A	26816, 23521
226727_at	-0.605677	-0.18989	-8.5274	1.56241e-07	3.8228e-05	7.44282	CISD3, MLLT6	284106, 4302
217857_s_at	-0.88251	-0.203902	-8.52645	1.56484e-07	3.82669e-05	7.44123	RBM8A	9939
244664_at	-0.940069	-0.107059	-8.52531	1.56773e-07	3.83169e-05	7.43934	ZNF530	348327
218173_s_at	0.87933	0.205529	8.52415	1.57071e-07	3.83693e-05	7.43739	WHSC1L1	54904
236472_at	-1.16838	-0.211614	-8.52336	1.57274e-07	3.83983e-05	7.43607
219494_at	-0.705579	-0.171379	-8.52268	1.57447e-07	3.8409e-05	7.43495	, RAD54B	25788
202534_x_at	-0.701005	-0.191987	-8.52253	1.57487e-07	3.8409e-05	7.43468	DHFR	1719
205130_at	-0.751025	-0.0882602	-8.52048	1.58013e-07	3.85165e-05	7.43127	MOK	5891
224443_at	-1.36905	-0.252702	-8.5182	1.58601e-07	3.86393e-05	7.42746	LINC00467
228899_at	-1.23455	-0.333302	-8.51652	1.59037e-07	3.87247e-05	7.42465
200777_s_at	-0.615604	7.20512e-05	-8.51602	1.59167e-07	3.87356e-05	7.42382	BZW1	9689
203730_s_at	-0.889161	-0.134171	-8.51467	1.59519e-07	3.88005e-05	7.42155	ZKSCAN5	23660
238431_at	-1.05971	-0.198648	-8.5133	1.59874e-07	3.88661e-05	7.41928	ARL5A	26225
208770_s_at	-0.601273	-0.0651761	-8.51195	1.60227e-07	3.89311e-05	7.41702	EIF4EBP2	1979
1554293_at	-1.20257	-0.263804	-8.51155	1.60333e-07	3.8936e-05	7.41634	TTBK2	146057
212807_s_at	0.69632	0.0832901	8.51101	1.60473e-07	3.89494e-05	7.41544	SORT1	6272
212913_at	-1.32762	-0.266717	-8.50697	1.61534e-07	3.91859e-05	7.40869	MSH5-SAPCD1, SAPCD1	401251
236076_at	-1.1053	-0.194217	-8.50643	1.61678e-07	3.91999e-05	7.40778		257396
224714_at	-0.872495	-0.154553	-8.50505	1.62042e-07	3.92671e-05	7.40548	NIFK	84365
238557_at	-0.951391	-0.177908	-8.50393	1.6234e-07	3.93185e-05	7.4036	CHKB-AS1	100144603
229128_s_at	-1.05784	-0.238762	-8.50315	1.62545e-07	3.93471e-05	7.40231
218740_s_at	-0.673297	-0.101823	-8.50097	1.63125e-07	3.94592e-05	7.39866	CDK5RAP3	80279
205593_s_at	1.23252	0.204616	8.50058	1.63228e-07	3.94592e-05	7.39801	PDE9A	5152
212960_at	0.740273	0.257204	8.50043	1.63268e-07	3.94592e-05	7.39776	TBC1D9	23158
212060_at	-0.734465	-0.152139	-8.49999	1.63388e-07	3.94671e-05	7.39701	U2SURP	23350
222794_x_at	-0.625398	-0.122613	-8.49733	1.64099e-07	3.96072e-05	7.39256	MTPAP	55149, 102466227
224910_at	1.05465	0.116755	8.49717	1.64142e-07	3.96072e-05	7.3923	CARHSP1	23589
239751_at	1.35527	0.321299	8.49657	1.64301e-07	3.96078e-05	7.3913
1555864_s_at	-0.610777	-0.125468	-8.49642	1.64343e-07	3.96078e-05	7.39104	PDHA1	5160
214757_at	-0.860922	-0.188738	-8.49618	1.64405e-07	3.96078e-05	7.39065	DTX2P1-UPK3BP1-PMS2P11	441263
209281_s_at	1.30853	0.219895	8.49506	1.64708e-07	3.96538e-05	7.38877	ATP2B1	490
211682_x_at	2.0736	0.602198	8.49483	1.64771e-07	3.96538e-05	7.38838	UGT2B25P, UGT2B28, UGT2B11, UGT2B24P, UGT2B27P	54490, 10720
208662_s_at	0.743395	0.132666	8.49281	1.65314e-07	3.97635e-05	7.38501	TTC3	7267
46256_at	0.802859	0.171675	8.48706	1.66875e-07	4.01178e-05	7.37538	SPSB3	90864
216315_x_at	-0.707949	-0.0923219	-8.48618	1.67114e-07	4.01541e-05	7.37391	UBE2V1P9, UBE2V1P3
206245_s_at	-0.922243	-0.122726	-8.48584	1.67209e-07	4.01556e-05	7.37333	IVNS1ABP	10625
217808_s_at	-0.577875	-0.0950225	-8.4797	1.68897e-07	4.05396e-05	7.36305	MAPKAP1	79109
212847_at	-0.978755	-0.19893	-8.47706	1.69627e-07	4.06934e-05	7.35863
205104_at	0.853629	0.0744509	8.47573	1.69997e-07	4.07605e-05	7.3564	SNPH	9751
224849_at	0.911408	0.19091	8.4734	1.70646e-07	4.08762e-05	7.35249	TTC17	55761
229833_at	0.779219	0.13175	8.47335	1.70659e-07	4.08762e-05	7.35242	ALOX12-AS1	100506713
242751_at	-1.0392	-0.127338	-8.47246	1.70908e-07	4.08882e-05	7.35093
209424_s_at	-0.966761	-0.157028	-8.47234	1.70944e-07	4.08882e-05	7.35071	C1QTNF3-AMACR, AMACR	23600
209946_at	2.06243	0.488375	8.47221	1.70979e-07	4.08882e-05	7.3505	VEGFC	7424
227899_at	0.780374	0.130406	8.47086	1.71357e-07	4.09571e-05	7.34824	VIT	5212
204476_s_at	1.24284	0.214817	8.47039	1.71488e-07	4.0967e-05	7.34745	PC	5091
204159_at	-0.949985	-0.242291	-8.4693	1.71794e-07	4.10185e-05	7.34563	CDKN2C	1031
211212_s_at	-1.3889	-0.198854	-8.46884	1.71925e-07	4.10283e-05	7.34484	ORC5	5001
203138_at	-0.70408	-0.141118	-8.46763	1.72267e-07	4.10882e-05	7.34281	HAT1	8520
238021_s_at	0.664277	0.0997273	8.46722	1.72381e-07	4.10939e-05	7.34213	CRNDE	101927480
220585_at	0.991541	0.321053	8.46676	1.7251e-07	4.11033e-05	7.34136	HKDC1	80201
222048_at	-0.844131	-0.193149	-8.46542	1.7289e-07	4.11722e-05	7.33911	CRYBB2P1	1416
232530_at	1.35537	0.239988	8.462	1.73861e-07	4.13717e-05	7.33338	PLD1	5337
238821_at	-0.97057	-0.205828	-8.46183	1.7391e-07	4.13717e-05	7.33309	CSTF2	1478
207753_at	-0.742656	-0.165187	-8.45953	1.74564e-07	4.14699e-05	7.32924	ZNF304	57343
243008_at	-1.23821	-0.333089	-8.45945	1.74589e-07	4.14699e-05	7.3291
238030_at	-1.17597	-0.1967	-8.45942	1.74596e-07	4.14699e-05	7.32906	ZNF268	10795
207746_at	-1.07197	-0.395415	-8.45488	1.759e-07	4.17578e-05	7.32143
202586_at	-0.67869	-0.179377	-8.45373	1.76234e-07	4.18151e-05	7.31949	POLR2L	5441
220942_x_at	-0.822339	-0.153731	-8.45315	1.76402e-07	4.18332e-05	7.31852	FAM162A	26355
228642_at	1.03213	0.242705	8.45095	1.77039e-07	4.19624e-05	7.31483	, HOTAIRM1
227004_at	0.814582	0.105882	8.44972	1.77396e-07	4.20252e-05	7.31276	CDKL5	6792
225587_at	0.794837	0.118411	8.4489	1.77635e-07	4.20311e-05	7.31138	TMEM129	92305
200886_s_at	-0.596313	-0.0908349	-8.44868	1.77697e-07	4.20311e-05	7.31102	PGAM1, PGAM4,	5223, 441531
226866_at	0.602421	0.17384	8.44868	1.77699e-07	4.20311e-05	7.31102	ESCO1	114799
235029_at	-0.634649	-0.258366	-8.44771	1.77979e-07	4.20757e-05	7.3094	GINS4	84296
1555623_at	0.55926	0.151088	8.44354	1.79202e-07	4.23428e-05	7.30239
1554822_at	-0.874996	-0.281212	-8.44032	1.80151e-07	4.25278e-05	7.29698	PHTF2	57157
204822_at	-0.894987	-0.109997	-8.44025	1.80172e-07	4.25278e-05	7.29686	TTK	7272
202641_at	0.739434	0.0924261	8.4387	1.8063e-07	4.26136e-05	7.29426	ARL3	403
224345_x_at	-0.885017	-0.172897	-8.43719	1.81079e-07	4.26975e-05	7.29171	FAM162A	26355
235282_at	-0.838473	-0.152646	-8.43629	1.81345e-07	4.27381e-05	7.29021		102724532
219522_at	-1.01309	-0.346419	-8.43581	1.81489e-07	4.275e-05	7.2894	FJX1	24147
235226_at	1.78253	0.247473	8.43501	1.81728e-07	4.2784e-05	7.28805	CDK19	23097
219567_s_at	-1.27637	-0.352237	-8.43444	1.81897e-07	4.28016e-05	7.2871	EXO5	64789
218689_at	-1.18825	-0.294754	-8.43253	1.82468e-07	4.29138e-05	7.28389	FANCF	2188
232889_at	-0.933637	-0.317033	-8.43057	1.83056e-07	4.29954e-05	7.28059
225855_at	-0.952099	-0.102509	-8.4304	1.83108e-07	4.29954e-05	7.2803	EPB41L5	57669
224666_at	-0.882106	-0.216544	-8.43036	1.83121e-07	4.29954e-05	7.28023	NSMCE1	197370
1553192_at	-0.851095	-0.150598	-8.42992	1.83254e-07	4.29954e-05	7.27949	ZNF441	126068
222548_s_at	-1.14974	-0.182359	-8.42939	1.83411e-07	4.29954e-05	7.27861	MAP4K4	9448
1556766_at	-0.618594	-0.0540706	-8.42927	1.83448e-07	4.29954e-05	7.2784
208832_at	-1.01342	-0.287832	-8.42913	1.83491e-07	4.29954e-05	7.27816	ATXN10	25814
208114_s_at	-0.916265	-0.157286	-8.42886	1.83571e-07	4.29954e-05	7.27771	ISG20L2	81875
1553269_at	-1.48173	-0.304758	-8.42544	1.84606e-07	4.32155e-05	7.27196	ZNF718	255403
235008_at	1.10165	0.185145	8.42508	1.84716e-07	4.3219e-05	7.27135
225741_at	-0.74405	-0.137146	-8.42165	1.85759e-07	4.34407e-05	7.26558	THUMPD3	25917
226285_at	-0.777655	-0.149406	-8.4212	1.85895e-07	4.34502e-05	7.26483	CAPRIN1	4076
228087_at	0.783617	0.200034	8.42021	1.86199e-07	4.3499e-05	7.26315	CCDC126	90693
219030_at	-0.869206	-0.166626	-8.41948	1.86422e-07	4.35287e-05	7.26193	TPRKB	51002
224359_s_at	-0.625558	-0.173401	-8.41731	1.87089e-07	4.36425e-05	7.25827	HOOK3	84376
237065_s_at	-0.961834	-0.149612	-8.41727	1.87102e-07	4.36425e-05	7.2582	LAMTOR5-AS1
228783_at	0.766163	0.191153	8.41677	1.87255e-07	4.36558e-05	7.25737	BVES	11149
238804_at	1.29526	0.199229	8.41401	1.88106e-07	4.38319e-05	7.25272
205022_s_at	0.983254	0.207533	8.41232	1.88628e-07	4.39309e-05	7.24988	FOXN3	1112
220673_s_at	1.15287	0.165113	8.4111	1.89008e-07	4.39827e-05	7.24782	PPP4R4	57718
233271_at	-0.85447	-0.147225	-8.41098	1.89044e-07	4.39827e-05	7.24763
206583_at	-0.732408	-0.212406	-8.40546	1.9077e-07	4.43616e-05	7.23832	KRBOX4	55634
205559_s_at	1.01962	0.289422	8.40412	1.91191e-07	4.44369e-05	7.23606	PCSK5	5125
201112_s_at	-0.700983	-0.152039	-8.4026	1.91668e-07	4.45249e-05	7.23351	CSE1L	1434
219848_s_at	-1.71745	-0.271734	-8.39965	1.926e-07	4.47187e-05	7.22853	ZNF432	9668
1568611_at	-0.91809	-0.291278	-8.39843	1.9299e-07	4.47863e-05	7.22646
207351_s_at	0.779052	0.301264	8.39574	1.93845e-07	4.49462e-05	7.22194	SH2D2A	9047
201903_at	0.626797	0.0805913	8.39564	1.93877e-07	4.49462e-05	7.22177	UQCRC1	7384
1555279_at	-0.964465	-0.210459	-8.39362	1.94524e-07	4.50733e-05	7.21835	ARMC8	25852
229880_at	-0.880828	-0.172179	-8.3921	1.9501e-07	4.51629e-05	7.2158
230363_s_at	-0.959391	-0.305741	-8.38885	1.96055e-07	4.53819e-05	7.21032	INPP5F	22876
234465_at	-0.742068	-0.10523	-8.3858	1.97043e-07	4.55874e-05	7.20517	EME1	146956
204768_s_at	-0.843873	-0.176219	-8.38503	1.97295e-07	4.56054e-05	7.20387	FEN1	2237
244353_s_at	0.953554	0.179741	8.38475	1.97386e-07	4.56054e-05	7.20339	SLC2A12	154091
208999_at	-0.824737	-0.182016	-8.38464	1.97422e-07	4.56054e-05	7.20321	SEPT8	23176
201540_at	1.15782	0.32006	8.38281	1.98018e-07	4.57198e-05	7.20012	FHL1	2273
209068_at	-0.825852	-0.166902	-8.37984	1.98989e-07	4.59208e-05	7.19511	HNRNPDL	9987
201960_s_at	0.791166	0.140489	8.37853	1.99419e-07	4.59967e-05	7.1929	MYCBP2	23077
226037_s_at	-0.604835	-0.157761	-8.37759	1.9973e-07	4.6045e-05	7.1913	TAF9B	51616
244027_at	-0.616064	0.00104992	-8.37684	1.99975e-07	4.60783e-05	7.19004
221290_s_at	-1.04269	-0.256386	-8.37318	2.01185e-07	4.63335e-05	7.18387	MUM1	84939
217492_s_at	0.55832	0.0698766	8.37044	2.02096e-07	4.65197e-05	7.17924	PTENP1, PTEN	11191, 5728
222844_s_at	-1.19282	-0.282961	-8.36972	2.02336e-07	4.65515e-05	7.17802	SRR	63826
228739_at	1.45809	0.286129	8.36896	2.02589e-07	4.65638e-05	7.17674	CYS1	192668
225086_at	-0.803953	-0.196335	-8.36886	2.02624e-07	4.65638e-05	7.17657	FAM98B	283742
240831_at	0.868487	0.0548313	8.36864	2.02697e-07	4.65638e-05	7.1762
1553158_at	0.910361	0.240608	8.36715	2.03195e-07	4.66547e-05	7.17368	CEP19, RNU6-646P	84984
240434_at	0.66275	0.22442	8.36586	2.03629e-07	4.67308e-05	7.1715
201519_at	-0.597701	-0.198682	-8.36398	2.04263e-07	4.68525e-05	7.16831	TOMM70	9868
223698_at	-1.00786	-0.13085	-8.36106	2.05248e-07	4.70548e-05	7.16339	SLC25A36	55186
203856_at	-0.663099	-0.105453	-8.36029	2.05511e-07	4.70697e-05	7.16207	VRK1	7443
239096_at	-0.669604	-0.0894835	-8.36006	2.05587e-07	4.70697e-05	7.1617
232476_at	-0.972431	-0.269408	-8.35996	2.05623e-07	4.70697e-05	7.16151
204766_s_at	-0.625295	-0.0728573	-8.35871	2.06045e-07	4.71005e-05	7.15942	NUDT1	4521
239028_at	-0.851948	-0.288832	-8.35863	2.06073e-07	4.71005e-05	7.15928	LYPD6	130574
212459_x_at	-0.81126	-0.245479	-8.35831	2.06182e-07	4.71005e-05	7.15874	SUCLG2	8801
204287_at	0.953966	0.189147	8.3579	2.06324e-07	4.71005e-05	7.15803	SYNGR1	9145
227448_at	-1.57803	-0.424304	-8.35789	2.06324e-07	4.71005e-05	7.15803	ARGLU1	55082
228185_at	-1.11115	-0.310823	-8.35762	2.06417e-07	4.71005e-05	7.15757	ZNF25	219749
219548_at	-0.803988	-0.138154	-8.35743	2.06483e-07	4.71005e-05	7.15724	ZNF16	7564
203279_at	0.990101	0.202987	8.35536	2.0719e-07	4.72381e-05	7.15374	EDEM1	9695
222764_at	0.784886	0.090177	8.35479	2.07385e-07	4.7259e-05	7.15277	ASRGL1	80150
208661_s_at	0.749944	0.135037	8.35252	2.08164e-07	4.74126e-05	7.14894	TTC3, TTC3P1	7267
242770_at	-0.762223	-0.15404	-8.35051	2.08857e-07	4.75466e-05	7.14553
241845_at	-0.978541	-0.118869	-8.34814	2.09674e-07	4.77089e-05	7.14153
[truncated: 1,370 more rows]

## Sheet: NIC14
AffyIDs	logFC	AveExpr	t	P.Value	adj.P.Val	B	Gene_Symbol	EntrezID
220669_at	-0.546931	-0.234255	-6.53049	5.24293e-06	1	3.08624	OTUD4	54726
242091_at	0.503348	-0.0727593	6.02945	1.37712e-05	1	2.42359	ZNF720	124411
208651_x_at	0.75525	0.261414	5.9577	1.58572e-05	1	2.32493	CD24	100133941
234597_at	-0.460435	-0.391332	-5.91633	1.72059e-05	1	2.26761
230979_at	0.545172	0.305627	5.81259	2.11357e-05	1	2.1225	BMPR1A	657
217814_at	0.435404	0.122278	5.78487	2.23352e-05	1	2.0834	CCDC47	57003
206943_at	0.552112	0.227283	5.73532	2.46577e-05	1	2.01314	TGFBR1	7046
236164_at	-0.509907	-0.263245	-5.67707	2.77094e-05	1	1.93	GABPB1	2553, 55056
229021_at	0.525133	0.173588	5.5433	3.62846e-05	1	1.73673	MCTP2	55784
214422_at	-0.415163	-0.272727	-5.142	8.25449e-05	1	1.13801
207351_s_at	0.461962	0.301264	4.97851	0.000115991	1	0.886266	SH2D2A	9047
231327_at	-0.373656	-0.0777931	-4.95777	0.000121131	1	0.854019
244450_at	-0.348237	-0.273055	-4.83127	0.000157948	1	0.655878
217357_at	0.380696	0.154322	4.81034	0.000165068	1	0.622839
235751_s_at	0.450508	0.248375	4.79908	0.000169028	1	0.605056	VMO1	284013
1564407_a_at	-0.386273	-0.169913	-4.78638	0.000173617	1	0.584955
244252_at	0.429922	0.115014	4.78197	0.000175238	1	0.577978
205390_s_at	-0.462799	-0.246314	-4.74511	0.000189417	1	0.519506	ANK1	286
215109_at	-0.321146	-0.168064	-4.66116	0.000226252	1	0.385566
235178_x_at	-0.433563	-0.280346	-4.39363	0.000400153	1	-0.047737	ESCO2	157570
1556226_at	-0.400052	-0.200102	-4.30027	0.000488862	1	-0.201091
226064_s_at	0.313147	0.262995	4.20161	0.000604415	1	-0.364225	DGAT2	84649
221317_x_at	0.406336	0.0792061	4.1997	0.000606897	1	-0.367382	PCDHB6	56130
1559674_at	0.361758	0.122492	4.19321	0.000615442	1	-0.378153	ZNF333	84449
232991_at	-0.387351	-0.306493	-4.1533	0.000670714	1	-0.444473
238341_at	-0.461434	-0.322216	-4.06154	0.000817593	1	-0.597541
1556804_s_at	0.538038	0.136817	4.04753	0.000842731	1	-0.620994
230713_at	-0.373891	-0.2844	-4.03166	0.000872129	1	-0.647562
215685_s_at	-0.361246	-0.0501477	-3.96228	0.00101329	1	-0.76397	DLX2	1746
239557_at	-0.383718	-0.192217	-3.92347	0.00110207	1	-0.82925
1554074_s_at	0.330922	0.0968534	3.90078	0.00115755	1	-0.867467	SLFNL1	200172
224483_s_at	0.272685	-0.0910985	3.86306	0.00125608	1	-0.93108	MFSD9	84804
242868_at	-0.455472	0.11675	-3.86172	0.00125975	1	-0.933356
239936_at	-0.477126	-0.314211	-3.77484	0.00152065	1	-1.08021	DLEU2	406948
233674_at	0.342399	0.21329	3.75379	0.00159162	1	-1.11585
222812_s_at	0.330831	0.298575	3.7071	0.00176113	1	-1.195	RHOF	54509
209652_s_at	0.577743	0.461335	3.64731	0.00200475	1	-1.29645	PGF	5228
236719_at	0.237453	0.123532	3.64622	0.00200949	1	-1.2983
203661_s_at	0.307566	0.411926	3.60562	0.00219429	1	-1.36727	TMOD1	7111
227557_at	-0.302812	-0.0799897	-3.59034	0.00226814	1	-1.39324	SCARF2	91179
207312_at	0.300377	0.217213	3.54063	0.00252597	1	-1.47776	PHKG1	5260
240241_at	-0.366804	-0.258283	-3.4959	0.00278282	1	-1.55385
1567253_at	-0.273548	-0.0301164	-3.41344	0.00332609	1	-1.69412	OR10D3
241885_at	-0.398403	-0.356211	-3.40341	0.00339901	1	-1.7112
235029_at	-0.253028	-0.258366	-3.36802	0.00366898	1	-1.77138	GINS4	84296
238311_at	0.392841	-0.14247	3.35554	0.00376921	1	-1.79261
229461_x_at	0.386576	-0.129148	3.33198	0.00396577	1	-1.83266	NEGR1	257194
244027_at	0.242581	0.00104992	3.29846	0.00426299	1	-1.88961
228326_at	0.340697	0.186664	3.25988	0.00463238	1	-1.95513	WDR27	253769
238509_at	-0.264679	-0.196351	-3.22548	0.00498828	1	-2.0135
1558053_s_at	-0.289905	-0.141628	-3.21266	0.00512759	1	-2.03523
244779_at	0.293386	-0.248559	3.19812	0.00529037	1	-2.05988	ZDHHC2	51201
214447_at	0.360647	-0.0268238	3.17493	0.00556042	1	-2.09916	ETS1	2113
229514_at	-0.354512	-0.163883	-3.14618	0.00591421	1	-2.14784	GPATCH2L	55668
236524_at	-0.346678	-0.392121	-3.12605	0.0061749	1	-2.18187	TM2D1	83941
232338_at	-0.323905	-0.358743	-3.09371	0.0066175	1	-2.2365	ZNF431	170959
236180_at	0.351672	0.231068	3.08868	0.006689	1	-2.24499
230383_x_at	0.380785	-0.19853	3.07368	0.00690702	1	-2.2703	SLFN5	162394
227868_at	0.345956	0.233333	3.04985	0.00726764	1	-2.31046		154761
1560622_at	-0.251964	-0.223319	-3.04974	0.00726935	1	-2.31065
212478_at	0.306686	0.18505	3.04874	0.00728476	1	-2.31232	RMND5A	64795
1554631_at	0.271726	0.0780712	3.04519	0.00734023	1	-2.31831	ATM	472
236428_at	-0.326539	-0.258906	-3.01188	0.00788048	1	-2.37435
241499_at	-0.294267	-0.230519	-3.01141	0.00788835	1	-2.37514	ZNF621	285268
231964_at	0.301261	0.300476	2.97851	0.00846053	1	-2.4304	BICD1	636
1569631_at	-0.231586	-0.178394	-2.96978	0.0086191	1	-2.44505	NMNAT1,	64802
235376_at	-0.390078	-0.326624	-2.96629	0.00868319	1	-2.45089
231128_at	0.229895	0.0377256	2.96356	0.00873363	1	-2.45546	FAM181B	220382
205003_at	0.408906	0.167271	2.92738	0.00943072	1	-2.51605	DOCK4	9732
232912_at	-0.334391	-0.281078	-2.90939	0.00979721	1	-2.54612

## Sheet: NIC474
AffyIDs	logFC	AveExpr	t	P.Value	adj.P.Val	B	Gene_Symbol	EntrezID
236180_at	2.1851	0.231068	19.1914	6.34148e-13	2.88441e-07	17.8362
230710_at	1.75063	0.0781527	14.5642	5.24567e-11	1.15208e-05	14.5653	MIR210, MIR210HG	406992
227868_at	1.61359	0.233333	14.2249	7.59869e-11	1.15208e-05	14.2691		154761
203435_s_at	1.55996	0.338351	13.2217	2.37888e-10	2.70507e-05	13.3381	MME	4311
227614_at	2.13316	0.867486	12.9919	3.12106e-10	2.82733e-05	13.1126	HKDC1	80201
203434_s_at	1.31231	0.0970844	12.7085	4.38711e-10	2.82733e-05	12.8278	MME	4311
221478_at	0.912522	0.0822838	12.677	4.55798e-10	2.82733e-05	12.7957	BNIP3L	665
219888_at	1.32321	0.0427373	12.6055	4.97278e-10	2.82733e-05	12.7224	SPAG4	6676
204320_at	1.11101	0.202996	12.2505	7.70884e-10	3.89595e-05	12.3514	COL11A1	1301
209529_at	0.968442	0.569826	11.7728	1.4136e-09	6.42973e-05	11.8323	PLPP2	8612
208691_at	1.35365	0.620311	11.6877	1.57806e-09	6.52526e-05	11.7374	TFRC	7037
234597_at	-0.891092	-0.391332	-11.45	2.15319e-09	8.16148e-05	11.4682
207332_s_at	1.65974	0.766221	11.3723	2.38636e-09	8.34948e-05	11.3788	TFRC	7037
236480_at	1.58652	-0.00345365	11.066	3.59681e-09	0.000111769	11.0202	MIR210HG
1557389_at	1.42973	0.405915	11.0479	3.68592e-09	0.000111769	10.9988	SH3PXD2A-AS1	100505839
37892_at	1.54576	0.395766	10.9952	3.95955e-09	0.000112562	10.9359	COL11A1	1301
218574_s_at	-0.925421	-0.197991	-10.8278	4.97903e-09	0.000133218	10.7341	LMCD1	29995
226834_at	0.804323	0.164981	10.692	6.00754e-09	0.000151807	10.5681	CLMP	79827
208134_x_at	1.20044	0.177206	10.641	6.44994e-09	0.000154408	10.5052	PSG2	5670
205352_at	-1.03447	0.0991454	-10.5216	7.62359e-09	0.000173379	10.3568	SERPINI1	5274
212314_at	0.942185	0.484362	10.4096	8.93102e-09	0.000193441	10.2158	SEL1L3	23231
224604_at	0.840929	0.112606	10.3564	9.63223e-09	0.000199146	10.1484	C4orf3	401152
209699_x_at	0.824642	1.20583	10.085	1.42286e-08	0.00027213	9.7991	AKR1C1, AKR1C2	1645, 1646
201849_at	1.48867	-0.0635852	10.0787	1.43589e-08	0.00027213	9.79091	BNIP3	664
212689_s_at	0.846261	0.144699	10.015	1.57541e-08	0.000286629	9.70755	KDM3A	55818
223136_at	-0.730421	-0.325761	-9.98006	1.65789e-08	0.000290034	9.66162	AIG1	51390
200632_s_at	2.38424	0.441783	9.9372	1.76532e-08	0.000294713	9.60507	NDRG1	10397
227068_at	0.722307	-0.175858	9.91859	1.81422e-08	0.000294713	9.58044	PGK1	5230
217998_at	0.735023	0.296615	9.82923	2.06967e-08	0.000324615	9.46155	PHLDA1, NAP1L1	22822, 4673
242053_at	-1.03169	-0.279595	-9.75039	2.32639e-08	0.00034973	9.35582
223376_s_at	0.781198	0.181799	9.73408	2.38357e-08	0.00034973	9.33385	BRI3	25798
1554052_at	-0.684077	-0.120213	-9.57717	3.01515e-08	0.000416125	9.12069	CNOT1	23019
207339_s_at	1.3505	0.151851	9.57631	3.01905e-08	0.000416125	9.11951	LTB	4050
201324_at	0.946549	0.393836	9.45989	3.60062e-08	0.000481687	8.95928	EMP1	2012
203124_s_at	0.749581	0.222671	9.39392	3.98134e-08	0.000517402	8.86768	SLC11A2	4891
217356_s_at	0.703886	-0.0745215	9.2683	4.82767e-08	0.000609961	8.69167	PGK1	5230
201848_s_at	1.52146	-0.0804351	9.15504	5.75283e-08	0.000707207	8.53116	BNIP3, BNIP3P1	664
222847_s_at	1.32315	0.157328	8.99949	7.337e-08	0.000878216	8.30786	EGLN3	112399
236453_at	-0.774831	-0.145077	-8.91493	8.38423e-08	0.000977834	8.18508
201325_s_at	0.863404	0.371399	8.8469	9.34004e-08	0.00106208	8.08558	EMP1	2012
218274_s_at	0.621789	0.192406	8.82291	9.70383e-08	0.00107653	8.05034	ANKZF1	55139
1555841_at	0.590364	0.280274	8.79159	1.02012e-07	0.00110476	8.0042	MSANTD3	91283
238750_at	0.906131	0.103411	8.77641	1.04517e-07	0.00110557	7.9818	CCL28	56477
205807_s_at	-0.688949	-0.110802	-8.75079	1.08892e-07	0.00112567	7.94391	TUFT1	7286
228082_at	0.852536	0.148858	8.69346	1.19395e-07	0.00119276	7.85879	CLMP	79827
222830_at	-0.798003	-0.114576	-8.68709	1.20627e-07	0.00119276	7.84929	GRHL1	29841
220663_at	0.988235	0.397978	8.66962	1.2407e-07	0.0012007	7.82325	IL1RAPL1	11141
229312_s_at	-0.666966	0.142383	-8.59099	1.40893e-07	0.00130729	7.70549	GKAP1	80318
232338_at	-0.897799	-0.358743	-8.57513	1.44567e-07	0.00130729	7.68163	ZNF431	170959
205769_at	-0.997223	-0.016126	-8.57445	1.44727e-07	0.00130729	7.6806	SLC27A2	11001
1560240_at	1.81809	0.327932	8.56662	1.4658e-07	0.00130729	7.6688	LINC01293
206156_at	0.710541	0.260091	8.49766	1.64009e-07	0.00141803	7.56456	GJB5	2709
229907_at	-1.04101	-0.164936	-8.49312	1.65232e-07	0.00141803	7.55766
204151_x_at	0.851862	1.24753	8.47207	1.71018e-07	0.00144051	7.52569	AKR1C1, AKR1C2	1645, 1646
205003_at	1.18179	0.167271	8.46048	1.74294e-07	0.00144141	7.50806	DOCK4	9732
221479_s_at	0.844725	0.103617	8.36063	2.05395e-07	0.00166828	7.35537	BNIP3L	665
217999_s_at	0.767967	0.298124	8.29976	2.27155e-07	0.00180115	7.26159	PHLDA1, NAP1L1	22822, 4673
1569631_at	-0.646704	-0.178394	-8.29312	2.29673e-07	0.00180115	7.25131	NMNAT1,	64802
240434_at	0.649902	0.22442	8.20369	2.66541e-07	0.00203043	7.11246
229812_at	-0.880555	-0.080352	-8.20078	2.67838e-07	0.00203043	7.10792	USP48	84196
241844_x_at	1.23156	0.247106	8.19074	2.72371e-07	0.00203094	7.09226	TMEM156	80008
212978_at	-0.591171	-0.248098	-8.10165	3.16281e-07	0.00232032	6.95259	LRRC8B	23507
222869_s_at	-0.732697	-0.326862	-8.04479	3.48121e-07	0.00251337	6.86285	ELAC1	55520
1561266_at	0.702085	0.132143	7.98902	3.82622e-07	0.0027193	6.77435
225911_at	-0.824229	-0.228557	-7.9342	4.20022e-07	0.002935	6.68693	NPNT	255743
205199_at	1.35495	-0.0357087	7.92608	4.25879e-07	0.002935	6.67394	CA9	768
201972_at	-0.571999	-0.140329	-7.91688	4.32619e-07	0.00293696	6.65921	ATP6V1A	523
202732_at	-0.648784	-0.0927703	-7.83065	5.01474e-07	0.00335433	6.52055	PKIG	11142
1557665_at	1.19182	0.154302	7.81947	5.11203e-07	0.00336986	6.5025
205768_s_at	-0.834323	-0.0228021	-7.77879	5.4831e-07	0.00356283	6.43663	SLC27A2	11001
243355_at	0.734075	0.0922799	7.75402	5.72274e-07	0.00365778	6.3964
229292_at	-0.691083	0.0494306	-7.74322	5.83063e-07	0.00365778	6.37883	EPB41L5	57669
230518_at	0.712325	0.345945	7.73928	5.87048e-07	0.00365778	6.37242	MPZL2	10205
227452_at	0.831063	0.364817	7.72484	6.01907e-07	0.00369968	6.3489	LINC00511	400619
231283_at	-0.66487	0.00931042	-7.67061	6.61322e-07	0.00401068	6.26026	MGAT4A	11320
226064_s_at	0.568673	0.262995	7.6301	7.09682e-07	0.00424734	6.19376	DGAT2	84649
213139_at	0.768691	0.254974	7.61082	7.33974e-07	0.00427525	6.16204	SNAI2	6591
1552390_a_at	-1.13815	-0.233197	-7.59869	7.49697e-07	0.00427525	6.14205	ERICH5	203111
237323_at	1.16331	0.351739	7.59745	7.51333e-07	0.00427525	6.14	HKDC1	80201
220669_at	-0.634205	-0.234255	-7.57257	7.84775e-07	0.00439876	6.09892	OTUD4	54726
206969_at	1.0156	0.117187	7.56662	7.93007e-07	0.00439876	6.08908	KRT34	3885
35156_at	-0.510575	-0.200362	-7.55753	8.05757e-07	0.00441563	6.07403	R3HCC1	203069
208540_x_at	0.565312	0.138194	7.55039	8.15903e-07	0.004418	6.06222	S100A11P1
1552389_at	-1.2185	-0.278104	-7.53254	8.41892e-07	0.00450509	6.03262	ERICH5	203111
235068_at	-0.674354	-0.217744	-7.48046	9.22761e-07	0.0047695	5.94601	ZDHHC21	340481
210051_at	0.575583	0.213412	7.47294	9.35096e-07	0.00477895	5.93346	RAPGEF3	10411
230979_at	0.699879	0.305627	7.46207	9.53221e-07	0.00481746	5.91532	BMPR1A	657
205830_at	-0.932447	-0.0523194	-7.45324	9.68216e-07	0.00483947	5.90057	CLGN	1047
238962_at	-0.647649	-0.334663	-7.43679	9.96819e-07	0.00492828	5.87305	ZNF681	148213
239853_at	-0.578752	-0.0503384	-7.42415	1.01937e-06	0.00493763	5.85189	KLC3	147700
1552685_a_at	-0.710572	-0.0855797	-7.3869	1.08904e-06	0.0052032	5.78936	GRHL1	29841
216594_x_at	0.669438	1.18848	7.3822	1.09818e-06	0.0052032	5.78146	AKR1C1, AKR1C2	1645, 1646
1569974_x_at	-0.493062	-0.152717	-7.37586	1.11064e-06	0.00520796	5.77079
206011_at	1.48233	0.427152	7.34136	1.18101e-06	0.00548142	5.71264	CASP1	834
203404_at	0.743419	0.149357	7.32504	1.21592e-06	0.00557717	5.68506	ARMCX2	9823
238432_at	0.726162	0.296147	7.32034	1.22616e-06	0.00557717	5.67712	DLGAP1-AS1
207366_at	1.12725	0.173734	7.28407	1.30832e-06	0.00589196	5.61568	KCNS1	3787
238831_at	-0.610318	-0.281812	-7.2569	1.37363e-06	0.00612543	5.56951	TMEM33	55161
223159_s_at	0.665931	0.0352344	7.2453	1.40253e-06	0.00619359	5.54978	NEK6	10783
204348_s_at	0.659253	-0.131381	7.23693	1.4238e-06	0.00622704	5.53551	AK4P3, AK4, AK4P1	205
238536_at	-0.654765	-0.305175	-7.21961	1.46885e-06	0.00636289	5.50597
230657_at	-0.820241	0.202298	-7.2009	1.51918e-06	0.0063981	5.47401	TMEM165	55858
235888_at	-1.16674	-0.287023	-7.18483	1.56384e-06	0.00652578	5.44652	GUSBP1	728411
218498_s_at	0.812705	-0.0611082	7.16567	1.61889e-06	0.00667613	5.41369	ERO1A	30001
203589_s_at	-0.568266	-0.0362802	-7.15927	1.63772e-06	0.00667613	5.40271	TFDP2	7029
204860_s_at	-0.869244	-0.41048	-7.14157	1.69101e-06	0.00667613	5.37231	, NAIP	4671
229390_at	0.878768	-0.0849577	7.13435	1.71327e-06	0.00667613	5.3599	FAM26F	441168
200738_s_at	0.502516	-0.0571657	7.13335	1.71638e-06	0.00667613	5.35818	PGK1	5230
241312_at	1.72959	0.108084	7.13225	1.71981e-06	0.00667613	5.35628	LINC00911	100996280
229461_x_at	-0.827031	-0.129148	-7.12836	1.73197e-06	0.00667613	5.34959	NEGR1	257194
210537_s_at	-0.606548	-0.402582	-7.1232	1.74823e-06	0.00668218	5.34072	TADA2A	6871
204519_s_at	0.88074	0.460125	7.07354	1.91322e-06	0.00707501	5.25504	PLLP	51090
228625_at	0.519988	0.166005	7.0518	1.99049e-06	0.00730138	5.21741	CITED4	163732
209970_x_at	1.41569	0.292171	7.03439	2.05467e-06	0.00747652	5.18723	CASP1	834
207351_s_at	0.652063	0.301264	7.0272	2.08183e-06	0.00751521	5.17475	SH2D2A	9047
200737_at	0.766987	-0.178021	6.98291	2.25743e-06	0.00790267	5.09772	PGK1	5230
223692_at	-0.786104	-0.194482	-6.97875	2.27472e-06	0.00790267	5.09046	NMNAT1	64802
212274_at	0.73999	0.262304	6.97844	2.27603e-06	0.00790267	5.08991	LPIN1	23175
226452_at	0.807965	-0.396759	6.95276	2.38576e-06	0.0081635	5.0451	PDK1	5163
204027_s_at	-0.500483	-0.256919	-6.95218	2.38832e-06	0.0081635	5.04408	METTL1	4234
229872_s_at	0.594268	0.331687	6.94815	2.40607e-06	0.0081635	5.03703		100996720
223158_s_at	0.539662	0.0348266	6.94032	2.44089e-06	0.0081635	5.02335	NEK6	10783
210367_s_at	-0.577283	0.0991534	-6.93048	2.48548e-06	0.00825194	5.00612	PTGES	9536
225462_at	-0.526554	-0.230915	-6.90594	2.6003e-06	0.00850892	4.96311	TMEM128	85013
206385_s_at	-0.821321	-0.238034	-6.89998	2.629e-06	0.00854141	4.95265	ANK3	288
209008_x_at	-0.617181	-0.452403	-6.88091	2.72313e-06	0.00878448	4.91914	KRT8P3, KRT8	3856
204547_at	-0.709481	-0.21021	-6.8479	2.89439e-06	0.00926167	4.86101	RAB40B	10966
229296_at	0.884699	0.227286	6.84466	2.91178e-06	0.00926167	4.8553	LINC01503	100506119
200650_s_at	0.416972	-0.0607403	6.8303	2.99024e-06	0.00944516	4.82996	LDHA,	3939
207012_at	-0.907779	-0.0364561	-6.82322	3.02976e-06	0.009504	4.81744	MMP16	4325
220346_at	-0.781223	-0.354148	-6.78849	3.23145e-06	0.0100673	4.75598	MTHFD2L	441024
241781_at	-0.929917	-0.216917	-6.75361	3.44813e-06	0.0105971	4.69405	CARNMT1	138199
205569_at	-0.500756	-0.0963871	-6.74006	3.53631e-06	0.0107798	4.66995	LAMP3	27074
228606_at	-0.64537	-0.185926	-6.72883	3.61115e-06	0.010877	4.64996	TCTEX1D2	255758
200804_at	0.455785	0.231341	6.72533	3.63486e-06	0.010877	4.64372	TMBIM6	7009
207419_s_at	0.766032	0.251474	6.70911	3.74662e-06	0.0110659	4.6148
33494_at	-0.518456	0.0679559	-6.70551	3.77199e-06	0.0110689	4.60836	ETFDH	2110
204636_at	0.839932	-0.0581176	6.69554	3.84292e-06	0.0112048	4.59057	COL17A1	1308, 100126326
205280_at	-0.762599	0.0512266	-6.68631	3.90992e-06	0.0112844	4.57406	GLRB	2743
202436_s_at	-0.549375	0.126536	-6.67918	3.96246e-06	0.0113353	4.56131	CYP1B1	1545
209732_at	1.23606	0.428992	6.66891	4.03947e-06	0.0114834	4.54293	CLEC2B	9976
1557684_at	-0.594489	-0.0839215	-6.65969	4.10989e-06	0.0115408	4.52641	ZNF286A, ZNF286B	57335, 729288
208353_x_at	0.435597	0.135812	6.65962	4.11041e-06	0.0115408	4.52629	ANK1	286
236164_at	-0.597366	-0.263245	-6.6508	4.179e-06	0.0116614	4.51048	GABPB1	2553, 55056
213603_s_at	0.821416	0.312698	6.63306	4.32063e-06	0.0119119	4.47863	RAC2	5880
209442_x_at	-0.616876	-0.173583	-6.63299	4.32115e-06	0.0119119	4.47852	ANK3	288
203123_s_at	0.667657	0.225502	6.62922	4.35193e-06	0.0119245	4.47174	SLC11A2	4891
238638_at	0.52597	0.163916	6.62193	4.41201e-06	0.0120167	4.45863	SLC37A2	219855
235760_at	-0.770701	-0.241724	-6.59845	4.6114e-06	0.0122826	4.41638	NSD1	64324
201627_s_at	0.825223	0.285813	6.59838	4.612e-06	0.0122826	4.41625	INSIG1	3638
218489_s_at	-0.635551	-0.257147	-6.59582	4.63426e-06	0.0122826	4.41165	ALAD	210
227272_at	1.00554	0.343806	6.593	4.65901e-06	0.0122826	4.40656	C15orf52, RNA5SP392	388115
222646_s_at	0.517892	-0.0136755	6.59156	4.67165e-06	0.0122826	4.40396	ERO1A	30001
201626_at	0.885286	0.325418	6.56337	4.92687e-06	0.0128056	4.3531	INSIG1	3638
200810_s_at	-0.501368	-0.451877	-6.51391	5.41026e-06	0.0139031	4.26355	CIRBP	1153
235296_at	-0.542759	-0.147267	-6.50053	5.54926e-06	0.0140645	4.23927	EIF5A2	56648
234192_s_at	-0.812082	0.13421	-6.49629	5.59411e-06	0.0140645	4.23157	GKAP1	80318
226760_at	-0.494357	-0.179279	-6.49431	5.61521e-06	0.0140645	4.22797	MBTPS2	51360
1564372_s_at	-0.70525	-0.45471	-6.49133	5.64704e-06	0.0140645	4.22256	CASC2	255082
1554794_a_at	-0.463119	-0.335689	-6.49026	5.6586e-06	0.0140645	4.2206	UBE3C	9690
242989_at	-0.787758	-0.289011	-6.48075	5.76171e-06	0.014243	4.20331	STRN	6801
220129_at	-0.773246	-0.372772	-6.44153	6.2082e-06	0.0151817	4.13184	SOHLH2	54937
223655_at	1.21686	0.636888	6.4235	6.42528e-06	0.0155155	4.09892	CD163L1	283316
232183_at	-0.530925	0.0548378	-6.42214	6.44194e-06	0.0155155	4.09644	SERAC1	84947
209738_x_at	0.617561	0.213014	6.36534	7.18095e-06	0.0169235	3.99237	PSG6	5675
207765_s_at	0.579537	0.351886	6.33913	7.55109e-06	0.0175235	3.94419	FAM214B	80256
209875_s_at	2.14231	1.10017	6.32669	7.73373e-06	0.0178562	3.92127	SPP1	6696
201192_s_at	-0.51404	-0.266634	-6.32008	7.83259e-06	0.0179931	3.90909	PITPNA	5306
223140_s_at	-0.424562	-0.0567602	-6.31128	7.96617e-06	0.018208	3.89288	DHX36	170506
205873_at	-0.52229	-0.0385234	-6.30763	8.02231e-06	0.0182344	3.88614	PIGL	9487
226037_s_at	-0.455225	-0.157761	-6.30533	8.0579e-06	0.0182344	3.8819	TAF9B	51616
1554557_at	-0.493345	-0.00853854	-6.30267	8.09929e-06	0.0182374	3.87698	ATP11B	23200
1569303_s_at	0.54953	0.291683	6.28442	8.38898e-06	0.0187966	3.84327	RGS20	8601
1556704_s_at	0.689497	0.0255403	6.27785	8.49582e-06	0.0188808	3.83113		100133920, 101929583
225842_at	0.897298	0.390582	6.27701	8.50959e-06	0.0188808	3.82958	PHLDA1, NAP1L1	22822, 4673
244450_at	-0.449948	-0.273055	-6.24238	9.09785e-06	0.019991	3.76544
204044_at	0.519884	0.309737	6.23812	9.17303e-06	0.0200158	3.75754	QPRT	23475
200811_at	-0.511176	-0.473575	-6.23644	9.20291e-06	0.0200158	3.75442	CIRBP	1153
205730_s_at	0.624327	0.286243	6.2343	9.24114e-06	0.0200158	3.75044	ABLIM3	22885
202620_s_at	0.487243	0.0454992	6.22906	9.33517e-06	0.0201236	3.74072	PLOD2	5352
202831_at	0.872607	0.823042	6.22259	9.45287e-06	0.0202812	3.72869	GPX2	2877
1552546_a_at	1.07085	-0.0504068	6.19782	9.91732e-06	0.0210348	3.68265	LETM2	137994
1568812_at	0.494531	0.433649	6.18938	1.00809e-05	0.0211958	3.66693		100507140
227863_at	0.484013	0.144703	6.18542	1.01588e-05	0.0211958	3.65955	IFITM10,	402778
222444_at	0.463023	0.335918	6.18274	1.02116e-05	0.0212089	3.65456	ARMCX3	51566
228081_at	0.536139	0.1253	6.16828	1.05025e-05	0.0217138	3.6276	CCNG2	901
204457_s_at	0.612749	0.239351	6.14815	1.09216e-05	0.022377	3.59001	GAS1	2619
205014_at	0.417577	0.042047	6.12533	1.14176e-05	0.0231249	3.54734	FGFBP1	9982
222866_s_at	0.621403	0.234408	6.11563	1.16355e-05	0.0234176	3.52918	FLVCR2	55640
1552738_a_at	-0.652199	-0.298087	-6.0699	1.27225e-05	0.0252698	3.44335	ST7L	54879
1555536_at	0.696603	0.378225	6.06377	1.28757e-05	0.0253528	3.43183	ANTXR2	118429
209849_s_at	-0.463606	-0.241398	-6.06083	1.29501e-05	0.0253893	3.4263	RAD51C	5889
202019_s_at	-0.489711	-0.18809	-6.04977	1.32336e-05	0.0258339	3.40547	LANCL1	10314
223608_at	-0.559393	-0.154768	-6.04729	1.32979e-05	0.0258483	3.40082	EFCAB2	84288
225401_at	0.460478	0.137674	6.04281	1.34153e-05	0.0258555	3.39237	GLMP	112770
1557283_a_at	-0.652018	-0.312527	-6.02759	1.38216e-05	0.0263179	3.36368	ZNF519	162655
1552739_s_at	-0.690135	-0.362668	-6.02519	1.38866e-05	0.0263179	3.35917	ST7L	54879
202073_at	0.563793	0.0524651	6.01423	1.41885e-05	0.0266696	3.33848	OPTN	10133
236719_at	0.391572	0.123532	6.01279	1.42287e-05	0.0266696	3.33576
216247_at	-0.889997	-0.388425	-6.00992	1.43092e-05	0.0266743	3.33033	RPS20	6224
227865_at	-0.594913	-0.369848	-6.00485	1.44524e-05	0.0268312	3.32076	IDNK	414328
200699_at	0.472389	0.312486	6.00133	1.45526e-05	0.0268693	3.31411	KDELR2	11014
1555292_at	0.473842	0.0337939	5.99999	1.45911e-05	0.0268693	3.31157	STRIP2	57464
213186_at	-0.897083	-0.39717	-5.96171	1.57323e-05	0.0283802	3.23913	DZIP3	9666
225919_s_at	-0.53229	0.0276425	-5.95999	1.57859e-05	0.0283802	3.23586	C9orf72	203228
225047_at	-0.399149	-0.149109	-5.95146	1.60535e-05	0.0285714	3.21968	NUP58	9818
210986_s_at	-0.52498	-0.208863	-5.93305	1.66472e-05	0.0293487	3.18473	TPM1	7168
218353_at	-0.56941	-0.23424	-5.9224	1.70009e-05	0.0298565	3.1645	RGS5	8490
211653_x_at	0.668859	1.22326	5.91576	1.72254e-05	0.0301344	3.15187	AKR1C1, AKR1C2	1645, 1646
211682_x_at	1.44262	0.602198	5.9099	1.7426e-05	0.0303685	3.14073	UGT2B25P, UGT2B28, UGT2B11, UGT2B24P, UGT2B27P	54490, 10720
211363_s_at	-0.420254	-0.235584	-5.89917	1.77998e-05	0.0306152	3.1203	, MTAP	4507
223044_at	-0.892628	0.0435372	-5.89491	1.79503e-05	0.0306152	3.11219	SLC40A1	30061
219594_at	0.754522	0.395467	5.89432	1.79714e-05	0.0306152	3.11106	NINJ2	4815
40284_at	0.517552	0.197304	5.872	1.87837e-05	0.031761	3.0685	FOXA2	3170
1553670_at	-0.623284	0.0480863	-5.86173	1.91699e-05	0.0320566	3.0489	INTS4	92105
1559496_at	-0.611566	-0.276988	-5.8549	1.94314e-05	0.0323462	3.03586
219203_at	-0.428814	-0.211655	-5.85288	1.95095e-05	0.0323462	3.032	EMC9	51016
202052_s_at	0.556052	0.00366535	5.85152	1.95624e-05	0.0323462	3.02939	RAI14	26064
203896_s_at	-0.643848	-0.300019	-5.84834	1.96861e-05	0.0323462	3.02332	PLCB4	5332
211961_s_at	0.537088	0.196562	5.8474	1.97228e-05	0.0323462	3.02152	RAB7A	7879
217357_at	0.462675	0.154322	5.8462	1.97698e-05	0.0323462	3.01923
207231_at	-0.913594	-0.500604	-5.84153	1.9954e-05	0.0324176	3.0103	DZIP3	9666
204015_s_at	0.868799	0.520485	5.84019	2.00071e-05	0.0324176	3.00774	DUSP4	1846
1554096_a_at	-0.681304	-0.260809	-5.82859	2.04736e-05	0.0330227	2.98554	RBM33	155435
237706_at	-0.567346	-0.0609224	-5.81687	2.09566e-05	0.0336822	2.96309	STXBP4	252983
203438_at	0.927016	0.284292	5.80984	2.12517e-05	0.0340363	2.94961	STC2	8614
217859_s_at	-0.630576	-0.24345	-5.78245	2.24431e-05	0.0352007	2.89707	SLC39A9	55334
209146_at	0.551537	0.290761	5.77677	2.26987e-05	0.0354793	2.88615	MSMO1	6307
207312_at	0.489724	0.217213	5.77253	2.28915e-05	0.0355817	2.878	PHKG1	5260
230013_s_at	-0.507355	-0.0237972	-5.77189	2.29207e-05	0.0355817	2.87678	ARHGAP23	57636
204475_at	2.10216	1.45239	5.76573	2.32043e-05	0.0358994	2.86493	MMP1	4312
218884_s_at	-0.567741	-0.250928	-5.75796	2.35669e-05	0.0363368	2.84999	GUF1	60558
1562019_at	1.02327	0.656362	5.74874	2.40049e-05	0.0366396	2.83224	NT5DC4	284958
219020_at	0.549021	0.242762	5.74509	2.41805e-05	0.0367841	2.82522	HS1BP3	64342
241036_at	-0.489774	-0.285995	-5.73816	2.45181e-05	0.0370498	2.81186	HPS3	84343
242414_at	0.520532	0.333977	5.73092	2.48752e-05	0.0374651	2.79792	QPRT	23475
232270_at	-0.794069	-0.36273	-5.72413	2.52157e-05	0.0378526	2.78481	C9orf3	84909, 407012
211924_s_at	0.550715	0.294131	5.72008	2.54207e-05	0.03791	2.77701	PLAUR	5329
235520_at	-0.515312	-0.0714036	-5.71051	2.59129e-05	0.0382299	2.75852	ZNF280C	55609
1559674_at	0.492638	0.122492	5.71027	2.59249e-05	0.0382299	2.75808	ZNF333	84449
212230_at	0.878633	0.433898	5.70767	2.60605e-05	0.0382299	2.75305	PLPP3	8613
203726_s_at	0.665634	-0.113411	5.70616	2.61395e-05	0.0382299	2.75013	LAMA3	3909
203719_at	-0.396196	0.11375	-5.69968	2.64812e-05	0.0383383	2.73761	ERCC1	2067
1552946_at	1.29781	0.697322	5.69837	2.65507e-05	0.0383383	2.73508	ZNF114	163071
229975_at	0.585481	-0.0615692	5.69071	2.69618e-05	0.0384134	2.72027	BMPR1B	658
231128_at	0.440785	0.0377256	5.68213	2.74297e-05	0.0386592	2.70368	FAM181B	220382
227221_at	-0.529614	0.0912184	-5.67749	2.76861e-05	0.0386592	2.69471	ZMAT3	64393
206685_at	0.745836	0.0409751	5.67557	2.77929e-05	0.0386592	2.691	HCG4
220585_at	0.664404	0.321053	5.67334	2.79177e-05	0.0387144	2.68668	HKDC1	80201
1555733_s_at	-0.622898	-0.252541	-5.6594	2.87105e-05	0.0393341	2.65968	AP1S3	130340
213995_at	-0.495752	-0.237322	-5.64943	2.92917e-05	0.0400099	2.64036	ATP5S	27109
221207_s_at	-0.60214	-0.00900827	-5.63946	2.98847e-05	0.0403641	2.62103	NBEA	26960
228575_at	0.725527	0.322642	5.62438	3.08058e-05	0.0407152	2.59175	IL20RB	53833
221081_s_at	0.380202	0.156313	5.62409	3.08242e-05	0.0407152	2.59118	DENND2D	79961
228326_at	0.587338	0.186664	5.61981	3.10908e-05	0.040754	2.58287	WDR27	253769
241703_at	-0.70782	-0.00689916	-5.6165	3.12986e-05	0.0409084	2.57645	RUNDC3B	154661
228147_at	-0.635288	-0.339305	-5.61202	3.15827e-05	0.0410439	2.56773	SEPT7P2
236476_at	-0.635532	-0.349673	-5.60042	3.23301e-05	0.0417765	2.54517
203925_at	-0.642191	0.122336	-5.59478	3.27e-05	0.0417954	2.5342	GCLM	2730
1552947_x_at	1.13901	0.645557	5.58743	3.31887e-05	0.0422852	2.51989	ZNF114	163071
223413_s_at	-0.350298	-0.143095	-5.56565	3.4681e-05	0.0439404	2.47745	LYAR	55646
57540_at	-0.674014	-0.176987	-5.54282	3.63204e-05	0.0458896	2.43289	RBKS	64080
203360_s_at	-0.545492	-0.263887	-5.53838	3.66476e-05	0.0460239	2.42423	, MYCBP	26292
239788_at	-0.47617	-0.285245	-5.53758	3.67073e-05	0.0460239	2.42266
209624_s_at	-0.439247	-0.219899	-5.53435	3.69484e-05	0.0460436	2.41635	MCCC2	64087
205530_at	-0.488184	0.134457	-5.4993	3.96691e-05	0.0483738	2.34778	ETFDH	2110
219316_s_at	0.712064	0.315669	5.49472	4.00395e-05	0.0486949	2.33881	FLVCR2	55640
236646_at	0.767524	0.158497	5.49123	4.03239e-05	0.0489101	2.33198	TMEM52B	120939
214155_s_at	-0.487893	-0.200089	-5.48142	4.11354e-05	0.0495401	2.31275	LARP4	113251
235751_s_at	0.514523	0.248375	5.48101	4.11701e-05	0.0495401	2.31193	VMO1	284013
206155_at	1.68724	0.721348	5.47054	4.20557e-05	0.0504723	2.29139	ABCC2	1244
229391_s_at	0.55487	-0.10445	5.44567	4.42378e-05	0.0523997	2.24256	FAM26F	441168
241815_at	-0.665114	-0.283195	-5.44121	4.46413e-05	0.0527403	2.23379	ZNF431	170959
227919_at	1.39054	0.977015	5.42747	4.59089e-05	0.0538185	2.20676	, UCA1	652995
210552_s_at	-0.626062	0.15572	-5.38483	5.00826e-05	0.0581122	2.12274	RALGPS1	9649
243704_at	-0.760613	-0.448764	-5.37346	5.12607e-05	0.0592874	2.10029	GPATCH2	55105
204580_at	1.15333	1.00575	5.36792	5.18448e-05	0.0596875	2.08935	MMP12	4321
203912_s_at	0.516641	0.259361	5.36678	5.19651e-05	0.0596875	2.08711	DNASE1L1	1774
206943_at	0.516356	0.227283	5.36389	5.22737e-05	0.0597402	2.08139	TGFBR1	7046
203895_at	-0.601765	-0.260913	-5.3595	5.27457e-05	0.0601286	2.07271	PLCB4	5332
237593_at	-0.691847	-0.390613	-5.34904	5.38874e-05	0.0608203	2.05203	MNAT1	4331
1554074_s_at	0.452814	0.0968534	5.3376	5.51644e-05	0.0619541	2.02941	SLFNL1	200172
239557_at	-0.520843	-0.192217	-5.32556	5.65427e-05	0.0631103	2.00557
200987_x_at	-0.476059	-0.232512	-5.32498	5.66101e-05	0.0631103	2.00442	PSME3	10197
226034_at	1.02286	0.706181	5.32043	5.7141e-05	0.063394	1.9954	DUSP4	1846
239134_at	-0.510463	-0.381024	-5.31922	5.72827e-05	0.063394	1.99301
206061_s_at	-0.407019	-0.210049	-5.30717	5.87172e-05	0.0646669	1.96912	DICER1	23405
216870_x_at	-0.465949	-0.685532	-5.26326	6.42629e-05	0.0688422	1.88194	DLEU2, DLEU2L	406948
201536_at	0.402905	0.149715	5.25778	6.49908e-05	0.0690529	1.87106	DUSP3	1845
1554067_at	-0.572413	-0.145359	-5.25711	6.50811e-05	0.0690529	1.86971	C12orf66	144577
222849_s_at	-0.490194	-0.161157	-5.25675	6.51287e-05	0.0690529	1.86901	SCRN3	79634
214755_at	0.901701	0.476724	5.2535	6.55668e-05	0.0693557	1.86253	UAP1L1	91373
202459_s_at	0.423709	0.209426	5.23181	6.85631e-05	0.0716541	1.81936	LPIN2	9663
204347_at	0.537486	-0.247429	5.22879	6.89903e-05	0.0718081	1.81335	AK4	205
225317_at	-0.328882	-0.137289	-5.21494	7.09906e-05	0.0733863	1.78574	ACBD6	84320, 100527964
214422_at	-0.420105	-0.272727	-5.20322	7.27288e-05	0.0750127	1.76236
213902_at	0.530489	0.190862	5.20153	7.2982e-05	0.0751035	1.75901	ASAH1	427
229264_at	0.54948	0.339319	5.19922	7.33315e-05	0.0752928	1.75439
215109_at	-0.35801	-0.168064	-5.19621	7.3789e-05	0.0755919	1.74838
205083_at	1.61249	-0.0524862	5.19391	7.41406e-05	0.0757814	1.74379	AOX1	316
206137_at	0.402145	-0.0407296	5.18861	7.49564e-05	0.0762725	1.73321	RIMS2	9699
200742_s_at	0.531626	0.223579	5.18216	7.59629e-05	0.0771241	1.72032	TPP1	1200
204246_s_at	-0.352496	-0.20435	-5.18077	7.61806e-05	0.0771729	1.71756	DCTN3	11258
1556804_s_at	0.686926	0.136817	5.16758	7.82881e-05	0.0784949	1.69119
226749_at	-0.359283	-0.0951376	-5.16508	7.86936e-05	0.0784949	1.68619	MRPS9	64965
204977_at	-0.372577	-0.156933	-5.164	7.88694e-05	0.0784981	1.68404	DDX10	1662
220915_s_at	0.558403	0.164977	5.13983	8.29169e-05	0.0817284	1.63567
230193_at	0.406075	-0.136295	5.13428	8.38761e-05	0.0817284	1.62456	WDR66	144406
221488_s_at	0.3422	0.0895784	5.13309	8.40832e-05	0.0817284	1.62217	CUTA	51596
222856_at	0.582144	-0.160756	5.13265	8.41609e-05	0.0817284	1.62128	APLN	8862
200701_at	0.564925	0.230238	5.13195	8.42829e-05	0.0817284	1.61988	NPC2	10577, 100616211
239143_x_at	-0.43191	-0.287773	-5.12588	8.53497e-05	0.081908	1.60773	RNF138	51444
219631_at	-0.364674	0.0189341	-5.12263	8.59275e-05	0.081908	1.6012	LRP12	29967
210793_s_at	-0.432512	-0.225661	-5.12262	8.59285e-05	0.081908	1.60119	NUP98	4928
218882_s_at	-0.354734	-0.229365	-5.12257	8.59377e-05	0.081908	1.60109	WDR3	10885
222666_s_at	-0.371979	-0.111551	-5.12079	8.62546e-05	0.081908	1.59753	RCL1	10171
241353_s_at	0.681307	0.334475	5.12061	8.62881e-05	0.081908	1.59716
1554177_a_at	-0.425691	-0.195776	-5.11977	8.64373e-05	0.081908	1.59549	ATP5S	27109
209853_s_at	-0.45572	-0.23277	-5.11114	8.8e-05	0.0826998	1.57817	PSME3	10197
203988_s_at	0.381895	0.187039	5.10239	8.9613e-05	0.083869	1.56061	FUT8	2530
223518_at	-0.412835	-0.299145	-5.09931	9.01867e-05	0.0838881	1.55445	DFFA	1676
219257_s_at	0.658972	0.500491	5.09681	9.06561e-05	0.0841526	1.54943	SPHK1	8877
208937_s_at	-0.434088	0.153268	-5.09284	9.14072e-05	0.0842019	1.54145	ID1	3397
238822_at	-0.498877	-0.269394	-5.09021	9.19084e-05	0.0844533	1.53617
218997_at	-0.351241	-0.208402	-5.07948	9.39806e-05	0.0858423	1.51462	POLR1E	64425
232991_at	-0.473726	-0.306493	-5.07945	9.39862e-05	0.0858423	1.51456
209524_at	-0.501192	-0.224364	-5.07229	9.53961e-05	0.0868827	1.50017		50810
209121_x_at	0.551225	-0.0976098	5.06979	9.58926e-05	0.0868827	1.49515	NR2F2	7026, 100302258
203857_s_at	0.415356	0.173572	5.06885	9.60803e-05	0.0868827	1.49326	PDIA5	10954, 102465667
241754_at	-0.599729	-0.218528	-5.06288	9.7282e-05	0.0874891	1.48125	SCAI	286205
206554_x_at	-0.505419	-0.438985	-5.06122	9.76175e-05	0.0875763	1.47792	SETMAR	6419
219238_at	0.463865	0.198047	5.06015	9.78351e-05	0.0875987	1.47577	PIGV	55650
235921_at	0.423894	-0.07809	5.05566	9.87535e-05	0.0879457	1.46674
205220_at	0.648546	0.0214813	5.05311	9.92786e-05	0.0879571	1.46161	HCAR3, HCAR2	8843, 338442
202490_at	-0.576477	-0.319507	-5.04351	0.000101283	0.0883922	1.44229	IKBKAP	8518
207517_at	0.630234	-0.0462016	5.04343	0.000101301	0.0883922	1.44212	LAMC2	3918
204121_at	0.358588	0.154024	5.04281	0.000101431	0.0883922	1.44088	GADD45G	10912
236428_at	-0.545842	-0.258906	-5.03466	0.000103169	0.0895537	1.42446
230492_s_at	-0.563025	-0.509218	-5.0295	0.000104283	0.090177	1.41407	, GPCPD1	56261
230925_at	0.761189	0.390284	5.02689	0.000104853	0.0902295	1.40881	APBB1IP	54518
230277_at	-0.559756	0.160792	-5.01987	0.000106398	0.0909718	1.39466
224856_at	-0.415453	-0.230522	-5.01089	0.000108409	0.0925134	1.37657	FKBP5	2289
236515_at	-0.389865	-0.107479	-5.00584	0.000109558	0.0928449	1.36638
212527_at	-0.456847	-0.235791	-5.00474	0.000109809	0.0928449	1.36417	DESI1	27351
202903_at	-0.485309	-0.39655	-5.00118	0.000110628	0.0931155	1.35698	LSM5	23658
230383_x_at	0.619103	-0.19853	4.99736	0.000111514	0.0935826	1.34927	SLFN5	162394
236578_at	0.408186	0.206645	4.99144	0.000112899	0.094054	1.33733
227443_at	0.822158	0.834146	4.98942	0.000113378	0.094054	1.33324	LURAP1L	286343
230026_at	-0.508391	-0.300029	-4.98881	0.000113523	0.094054	1.33201	MRPL43	84545
233674_at	0.454369	0.21329	4.98134	0.000115307	0.0950132	1.31693
243661_at	-0.678084	-0.465775	-4.97167	0.00011766	0.0963632	1.29741	ZNF273	10793
224188_s_at	-0.352618	-0.189607	-4.96849	0.000118445	0.0965502	1.29098	XPNPEP3	63929
202937_x_at	-0.359171	-0.281534	-4.96375	0.000119625	0.0973364	1.2814	RRP7A	27341
243529_at	-0.38037	-0.284507	-4.94252	0.000125059	0.100639	1.23845	MARS2	92935
228204_at	-0.345162	-0.164803	-4.9415	0.000125324	0.100639	1.2364
219958_at	0.478696	0.216648	4.92234	0.000130456	0.103376	1.19761	TMEM74B	55321
224826_at	-0.479592	-0.454044	-4.90231	0.00013605	0.106694	1.15702	GPCPD1	56261
212866_at	-0.354404	-0.199729	-4.89639	0.00013775	0.10784	1.14502	R3HCC1	203069
214197_s_at	0.471978	0.303019	4.88705	0.000140477	0.109211	1.12606	SETDB1	9869
200822_x_at	0.289291	-0.0589035	4.8855	0.000140934	0.109211	1.12292	TPI1, TPI1P1	7167
202883_s_at	-0.373266	-0.241107	-4.87337	0.00014457	0.110703	1.0983	PPP2R1B	5519
208778_s_at	-0.368006	-0.129979	-4.86978	0.000145666	0.111355	1.091	TCP1, SNORA20	6950, 677806
224840_at	-0.331546	-0.225102	-4.86644	0.00014669	0.111949	1.08423	FKBP5	2289
234990_at	-0.568003	-0.274334	-4.861	0.000148378	0.1124	1.07317	CBX5	23468, 100616400
225532_at	0.488515	0.232037	4.86056	0.000148516	0.1124	1.07227	CABLES1	91768
222963_s_at	0.848062	0.407703	4.85909	0.000148973	0.112558	1.0693	IL1RAPL1	11141
209463_s_at	-0.423443	-0.133133	-4.8297	0.000158472	0.118165	1.00955	TAF12	6883
225750_at	0.51504	-0.183965	4.82601	0.000159709	0.118698	1.00203	ERO1A	30001
1553192_at	-0.486966	-0.150598	-4.82329	0.000160625	0.119184	0.9965	ZNF441	126068
232024_at	1.09791	0.423891	4.8175	0.000162594	0.120058	0.98472	GIMAP2	26157
206632_s_at	-0.589261	0.0177334	-4.81379	0.00016387	0.120626	0.977161	APOBEC3A, APOBEC3B	200315, 100913187, 9582
212541_at	-0.378139	-0.0825937	-4.80608	0.000166553	0.120997	0.961461	FLAD1	80308
1562020_s_at	0.813405	0.492451	4.80155	0.000168152	0.121403	0.952225	NT5DC4	284958
207855_s_at	-0.504822	-0.138865	-4.78834	0.000172901	0.123669	0.925303	CLCC1	23155
243405_at	-0.538574	-0.274735	-4.77524	0.000177744	0.125884	0.8986	BLOC1S5	63915
223235_s_at	1.05559	0.687929	4.77102	0.000179333	0.126215	0.889998	SMOC2	64094
224690_at	0.416053	0.312463	4.76864	0.000180238	0.126215	0.885134	FAM210B	116151
228315_at	-0.400663	0.110737	-4.75933	0.000183814	0.12784	0.866144	ZMAT3	64393
209946_at	1.15686	0.488375	4.75223	0.00018659	0.129221	0.851652	VEGFC	7424
214364_at	-0.537547	-0.194596	-4.74561	0.000189219	0.129617	0.83813	MTERF4	130916
207850_at	-0.489118	-0.33611	-4.74068	0.000191199	0.130777	0.828066	CXCL3	2921
202502_at	-0.373029	-0.162435	-4.73339	0.000194168	0.132211	0.813173	ACADM	34
235289_at	-0.458235	-0.276149	-4.73118	0.000195075	0.132394	0.808668	EIF5A2	56648
209531_at	-0.363803	-0.209022	-4.72668	0.000196941	0.133103	0.799468	GSTZ1	2954
235964_x_at	-0.305351	0.00520171	-4.716	0.000201441	0.135216	0.777628	SAMHD1	25939
229050_s_at	-0.429467	0.206831	-4.7121	0.000203112	0.135462	0.769646	, SNHG7	84973
204014_at	0.909484	0.577566	4.71093	0.000203611	0.135596	0.767273	DUSP4	1846
210276_s_at	0.461097	0.259667	4.70489	0.000206233	0.13617	0.754905	TRIOBP	11078
209885_at	-0.348231	0.064777	-4.7048	0.000206269	0.13617	0.754734	RHOD	29984
230361_at	0.570526	-0.0433428	4.7019	0.000207542	0.136546	0.748788	MROH1	727957
209844_at	-0.441299	-0.27867	-4.69162	0.000212109	0.139016	0.727754	HOXB13	10481
239863_at	-0.460903	-0.233241	-4.6901	0.000212792	0.139063	0.724646
235453_at	-0.560663	-0.137773	-4.68825	0.000213625	0.13923	0.720869	TOR1AIP2	163590
205543_at	-0.462626	-0.137942	-4.68643	0.000214451	0.139234	0.717139	HSPA4L	22824
216568_x_at	-0.400536	-0.321933	-4.68614	0.000214583	0.139234	0.716543
209263_x_at	0.396354	-0.0986884	4.68178	0.000216573	0.139932	0.707624	TSPAN4	7106
1556432_at	-0.570451	-0.377905	-4.68047	0.000217177	0.139932	0.70493
207746_at	-0.591424	-0.395415	-4.66471	0.000224552	0.14265	0.672656
210250_x_at	-0.414681	-0.225491	-4.66283	0.000225451	0.142822	0.668795	ADSL	158
201170_s_at	0.72041	0.376958	4.65815	0.000227698	0.143511	0.659209	BHLHE40	8553
204525_at	-0.465653	-0.149319	-4.65754	0.000227991	0.143511	0.657965	PHF14	9678
1553559_at	0.356967	0.224724	4.65729	0.000228116	0.143511	0.657438	TMEM171	134285
202478_at	0.549932	0.258674	4.65161	0.000230877	0.145047	0.645812	TRIB2	28951
227475_at	0.639902	0.434307	4.64835	0.00023248	0.145107	0.639124	FOXQ1	94234
235114_x_at	-0.417279	-0.169023	-4.64818	0.000232567	0.145107	0.638763	HOOK3	84376
218513_at	-0.731912	-0.350691	-4.64709	0.000233101	0.145241	0.636545	TMA16	55319
229428_at	-0.555813	-0.499971	-4.64413	0.00023457	0.145756	0.630476	TIMM23B	100652748
228153_at	0.387117	-0.051099	4.64183	0.000235721	0.146272	0.625745	RNF144B	255488
206686_at	0.666107	-0.13177	4.63623	0.000238535	0.147615	0.614277	PDK1	5163
210311_at	0.597548	-0.0634503	4.63445	0.000239438	0.147973	0.610625	FGF5	2250
223082_at	0.504463	0.474707	4.63173	0.000240828	0.148428	0.605032	SH3KBP1	30011
209653_at	-0.325933	-0.112504	-4.63024	0.000241589	0.148495	0.601984	, KPNA4	3840
203308_x_at	0.371749	0.23255	4.62641	0.00024356	0.149195	0.594129	HPS1	3257
1555785_a_at	-0.461425	-0.138648	-4.61792	0.000247993	0.149999	0.576699	XRN1	54464
218544_s_at	-0.322638	-0.168119	-4.61319	0.000250498	0.151313	0.566987	RCL1	10171
209714_s_at	-0.39405	-0.284547	-4.60546	0.000254645	0.152803	0.551122	CDKN3	1033
219638_at	-0.690106	-0.43233	-4.59744	0.000259024	0.154412	0.534647	FBXO22	26263
202819_s_at	-0.337622	-0.166678	-4.59587	0.000259892	0.154727	0.531416	TCEB3	6924
217728_at	0.427372	0.221763	4.59506	0.000260338	0.15479	0.529757	S100A6	6277
226341_at	-0.414591	-0.200996	-4.59208	0.000261994	0.155227	0.523629	OTUD6B-AS1	100506365
223711_s_at	-0.358009	-0.163601	-4.59189	0.000262097	0.155227	0.52325	THYN1	29087
239936_at	-0.579275	-0.314211	-4.58301	0.000267097	0.156664	0.504991	DLEU2	406948
243501_at	-0.43558	-0.285742	-4.57541	0.000271451	0.158091	0.489369	ATP5F1	515
1556226_at	-0.425214	-0.200102	-4.57074	0.000274162	0.159059	0.479768
213201_s_at	0.391025	0.221948	4.57004	0.000274568	0.159091	0.478339	TNNT1	7138
206857_s_at	-0.413928	0.256108	-4.56889	0.000275242	0.159279	0.475968	FKBP1B, MFSD2B	2281, 388931
224509_s_at	-0.363502	-0.212233	-4.56489	0.000277592	0.159723	0.467755	RTN4IP1	84816
219426_at	-0.345761	0.0740284	-4.56473	0.000277688	0.159723	0.46742	AGO3	192669
238501_at	-0.414042	-0.220295	-4.54786	0.000287847	0.163047	0.432705
213984_at	-0.41521	-0.225776	-4.54432	0.000290021	0.163406	0.425438	PDS5A	23244
244252_at	0.408477	0.115014	4.54344	0.000290568	0.163406	0.423617
221534_at	0.462198	0.24387	4.54275	0.000290996	0.163406	0.422195	C11orf68	83638
1569077_x_at	0.338608	0.201153	4.54067	0.000292288	0.163691	0.417914	ZNF836	162962
203999_at	-0.431847	-0.0669111	-4.53904	0.000293303	0.163691	0.414565	SYT1	6857
230703_at	-0.461574	-0.332657	-4.53712	0.000294509	0.163962	0.410601
215919_s_at	-0.375458	-0.140771	-4.53604	0.000295184	0.164137	0.408391	MRPS11	64963
214211_at	0.738341	0.534131	4.53513	0.000295757	0.164255	0.406518	FTH1	2495
207826_s_at	-0.362257	-0.139957	-4.53241	0.000297479	0.165009	0.40091	ID3	3399
202364_at	0.349872	0.238012	4.52632	0.000301363	0.166511	0.388376	MXI1	4601
205968_at	0.462205	0.291278	4.52464	0.000302448	0.166547	0.384905	KCNS3	3790
226535_at	0.663592	0.362243	4.51979	0.000305586	0.167796	0.374935	ITGB6	3694, 100505984
209118_s_at	0.373057	0.144545	4.51764	0.000306995	0.168237	0.37049	TUBA1A	7846
212871_at	-0.302222	-0.0827307	-4.50561	0.000314972	0.17178	0.345713	MAPKAPK5	8550
208647_at	0.319867	0.16434	4.49817	0.00032001	0.173281	0.330384	FDFT1	2222
1555439_at	-0.619954	-0.326207	-4.49474	0.000322366	0.173964	0.323299	GTF3C3	9330
227413_at	-0.498872	-0.197086	-4.49454	0.000322502	0.173964	0.322892	UBLCP1	134510
224483_s_at	-0.317122	-0.0910985	-4.49259	0.000323844	0.173986	0.318882	MFSD9	84804
236524_at	-0.497863	-0.392121	-4.4893	0.000326125	0.174727	0.312101	TM2D1	83941
227314_at	0.951299	0.647297	4.48101	0.000331948	0.177214	0.295008	ITGA2	3673
222764_at	-0.420657	0.090177	-4.47772	0.000334292	0.177631	0.288213	ASRGL1	80150
205164_at	-0.364285	-0.233401	-4.467	0.000342036	0.180379	0.266093	GCAT	23464
243372_at	-0.527863	-0.320306	-4.46696	0.000342065	0.180379	0.266014	HSPD1	3329
201596_x_at	-0.47293	-0.272936	-4.46102	0.000346432	0.181537	0.253762	KRT18	3875
226333_at	0.525935	0.263619	4.4578	0.000348821	0.182369	0.247125	IL6R	3570
205583_s_at	-0.319916	-0.30758	-4.45067	0.000354176	0.184105	0.232412	ALG13	79868
225446_at	-0.462482	-0.321582	-4.44909	0.00035538	0.184105	0.229135	BRWD1	54014
219045_at	-0.54841	0.296724	-4.44314	0.000359925	0.185619	0.216864	RHOF	54509
221317_x_at	0.429638	0.0792061	4.44054	0.000361929	0.186014	0.211502	PCDHB6	56130
203622_s_at	-0.392178	-0.167885	-4.43925	0.000362936	0.186111	0.20882	PNO1	56902
212311_at	0.44086	0.334557	4.43466	0.000366512	0.186775	0.199352	SEL1L3	23231
222837_s_at	-0.388508	-0.217178	-4.43183	0.00036874	0.187397	0.1935	NAA15	80155
205637_s_at	-0.438174	0.0865948	-4.43021	0.000370019	0.187838	0.190156	SH3GL3	6457
225696_at	-0.272209	-0.185664	-4.42597	0.000373391	0.188289	0.181397	COPS7B	64708
227899_at	0.407352	0.130406	4.42176	0.000376771	0.189064	0.172696	VIT	5212
208615_s_at	0.329218	0.150951	4.42146	0.000377007	0.189064	0.172091	PTP4A2	8073
238575_at	-0.375619	0.0531431	-4.41876	0.00037919	0.18974	0.166516	OSBPL6	114880
202350_s_at	-0.499022	0.0636419	-4.41383	0.000383217	0.191124	0.156317	MATN2	4147
1565817_at	0.450864	-0.0744257	4.41242	0.000384373	0.191281	0.153409
239969_at	-0.376081	-0.210619	-4.40858	0.000387546	0.191395	0.145472
200921_s_at	0.536577	0.294572	4.39931	0.000395311	0.19334	0.126318	BTG1	694
1554080_at	-0.324198	-0.295585	-4.39091	0.000402489	0.19509	0.108947	CNOT9	9125
226354_at	0.335025	0.255797	4.39061	0.000402748	0.19509	0.108326	LACTB	114294
229500_at	-0.416114	-0.19093	-4.38762	0.000405339	0.195672	0.102134	SLC30A9	10463
204646_at	-0.578845	-0.159345	-4.38323	0.000409165	0.196701	0.0930647	DPYD	1806
202342_s_at	-0.457643	0.16908	-4.37619	0.000415387	0.197634	0.078497	TRIM2	23321
1568849_at	0.862538	0.55379	4.3728	0.000418411	0.19845	0.071496	LINC00165
207753_at	-0.383688	-0.165187	-4.37056	0.000420421	0.198988	0.0668692	ZNF304	57343
226306_at	0.328597	0.215523	4.3676	0.000423103	0.199586	0.0607309	C6orf1	221491
205704_s_at	-0.440716	-0.0573476	-4.36674	0.000423879	0.199586	0.0589635	ATP6V0A2	23545
232912_at	-0.501553	-0.281078	-4.36379	0.000426573	0.200233	0.0528474
219174_at	-0.514911	-0.215347	-4.35296	0.000436591	0.203693	0.0304432	IFT74	80173
221159_at	0.429981	0.240518	4.35268	0.000436854	0.203693	0.0298618
205490_x_at	0.49482	0.329555	4.34949	0.000439848	0.203693	0.0232699	GJB3	2707
220299_at	-0.412173	0.0339525	-4.34701	0.000442202	0.204142	0.0181176	SPATA6	54558
215567_at	-0.435286	-0.158727	-4.34666	0.00044253	0.204142	0.017402
204807_at	-0.392149	-0.241288	-4.34372	0.000445332	0.205019	0.0113098	TMEM5	10329
206653_at	-0.408001	-0.23508	-4.34228	0.000446711	0.205446	0.00832732	POLR3G	10622
231930_at	-0.546571	0.235913	-4.33883	0.000450021	0.206346	0.00120182	ELMOD1	55531, 643923
229370_at	0.599256	-0.161587	4.33836	0.000450482	0.206346	0.00021288
223687_s_at	0.606948	0.388541	4.33717	0.000451631	0.206456	-0.0022453	LY6K	54742
220173_at	-0.543689	-0.160692	-4.33547	0.000453278	0.20652	-0.00575688	BBOF1	80127
208284_x_at	0.414247	0.180158	4.33372	0.000454982	0.20652	-0.00937886	GGTLC2, GGT1, GGT2, GGTLC3, GGTLC5P, GGTLC4P, GGT3P	91227, 2678, 92086, 728441, 102724197, 102724823
221604_s_at	-0.292751	-0.105104	-4.33364	0.000455061	0.20652	-0.00954611	PEX16	9409
1554018_at	1.08697	0.620915	4.33196	0.000456709	0.20652	-0.0130342	GPNMB	10457
211354_s_at	-0.660642	-0.182746	-4.3319	0.000456766	0.20652	-0.0131553	LEPR	3953
213223_at	0.396956	0.344935	4.3287	0.000459917	0.207532	-0.0197893	RPL28	6158, 102465483
235168_at	-0.438035	-0.336451	-4.31745	0.000471155	0.210308	-0.0430837	PIGM	93183
203658_at	-0.357978	0.0579526	-4.31391	0.000474752	0.210984	-0.0504222	SLC25A20	788
205676_at	0.642895	0.43452	4.31377	0.000474894	0.210984	-0.0507116	CYP27B1	1594
1554294_s_at	-0.488378	-0.339519	-4.31367	0.000474987	0.210984	-0.0509009	TTBK2	146057
221298_s_at	0.377087	0.180086	4.30737	0.000481456	0.212818	-0.0639522	SLC22A8	9376
225158_at	-0.337946	-0.215861	-4.30554	0.000483355	0.21283	-0.0677508	GFM1	85476
204541_at	0.355256	0.33045	4.29535	0.000494047	0.216281	-0.0888596	SEC14L2	23541
215570_s_at	-0.522372	-0.246636	-4.28039	0.000510184	0.221006	-0.119868	ZNF780B, ZNF780A	163131, 284323
239164_at	-0.516118	-0.369288	-4.27738	0.000513503	0.221903	-0.126122
208617_s_at	0.36128	0.193923	4.27039	0.000521278	0.224105	-0.140619	PTP4A2	8073
227486_at	0.551463	-0.0793091	4.2683	0.000523618	0.22463	-0.144938
226425_at	0.460231	0.361217	4.26264	0.000530035	0.226159	-0.156688	CLIP4	79745
219711_at	-0.485911	-0.270796	-4.25879	0.000534435	0.227115	-0.164661	ZNF586	54807
235178_x_at	-0.419365	-0.280346	-4.24975	0.000544934	0.230355	-0.183425	ESCO2	157570
229028_s_at	-0.32613	-0.298571	-4.24875	0.000546102	0.230635	-0.185491	ARL17B	51326, 100506084, 100996709
213049_at	-0.333723	0.1036	-4.2477	0.000547332	0.230726	-0.18766	RALGAPA1	253959
208025_s_at	0.896066	-0.133293	4.24665	0.000548576	0.230877	-0.18985	HMGA2	8091
238737_at	-0.33305	-0.160813	-4.24449	0.000551122	0.231274	-0.194316	TCEANC2	127428, 100616315
233105_at	-0.605373	-0.305171	-4.24414	0.00055154	0.231274	-0.195046
209096_at	-0.317877	-0.148387	-4.24402	0.000551682	0.231274	-0.195296	UBE2V2	7336
222270_at	-0.684469	-0.386503	-4.24208	0.000553995	0.231816	-0.199329	PPP4R3B	57223
204742_s_at	-0.338006	-0.19586	-4.24034	0.000556075	0.232361	-0.202944	PDS5B	23047
230363_s_at	-0.48489	-0.305741	-4.23985	0.000556653	0.232361	-0.203946	INPP5F	22876
205329_s_at	-0.395627	-0.132213	-4.23947	0.000557106	0.232361	-0.204731	SNX4	8723
238953_at	-0.951254	-0.62292	-4.23589	0.000561417	0.232992	-0.212164	SP2-AS1
229549_at	0.312986	0.162119	4.23266	0.000565331	0.233976	-0.218864	CALU	813
203432_at	-0.325349	-0.304652	-4.22962	0.000569044	0.235008	-0.225177	TMPO	7112
235410_at	-0.439081	-0.220542	-4.22935	0.000569375	0.235008	-0.225736	NPHP3	27031
205042_at	-0.479361	0.121988	-4.22614	0.000573323	0.235109	-0.2324	GNE	10020
236622_at	-0.483219	-0.261304	-4.22499	0.000574738	0.235177	-0.234777	PIGM	93183
235123_at	-0.407221	-0.251314	-4.21696	0.000584758	0.238117	-0.251442
235376_at	-0.554239	-0.326624	-4.21463	0.000587704	0.2383	-0.256287
242289_at	-0.465402	-0.254793	-4.20894	0.000594954	0.239906	-0.268108	MRPL42	28977
204324_s_at	-0.297696	-0.200606	-4.20694	0.000597517	0.240513	-0.272253	GOLIM4	27333
228624_at	0.543363	-0.0621086	4.20643	0.000598169	0.240562	-0.273305	TMEM144	55314
229720_at	0.52291	0.302397	4.20185	0.000604102	0.242306	-0.28282	BAG1	573
219781_s_at	0.293562	0.147344	4.19241	0.000616506	0.24598	-0.302415	ZNF771	51333
212151_at	-0.291112	-0.0126884	-4.18704	0.000623686	0.247221	-0.313576	PBX1	5087
200904_at	0.495109	0.333114	4.18036	0.000632723	0.249172	-0.327443	HLA-E	3133
223734_at	-0.553618	0.173064	-4.1798	0.000633491	0.249258	-0.328612	MGARP	84709
233297_s_at	-0.551035	-0.230761	-4.17876	0.000634913	0.249503	-0.330772	CCDC169, CCDC169-SOHLH2	728591, 100526761
213761_at	-0.363373	-0.175095	-4.17854	0.00063521	0.249503	-0.331223	MDM1	56890
209034_at	0.402753	0.231799	4.16929	0.000647995	0.252202	-0.350431	PNRC1	10957
205771_s_at	-0.367159	-0.306665	-4.16018	0.00066084	0.256469	-0.369348	AKAP7	9465
1557384_at	-0.406491	-0.22672	-4.15913	0.000662336	0.256831	-0.371528	ZNF131	7690
1558890_at	0.381524	0.232527	4.14887	0.000677161	0.2599	-0.392858
212301_at	-0.334896	-0.172718	-4.1451	0.000682691	0.261381	-0.400696	RTF1	23168
220945_x_at	-0.351214	-0.222701	-4.13987	0.000690421	0.263516	-0.411545	MANSC1	54682
1568815_a_at	-0.425549	-0.343466	-4.13958	0.000690864	0.263516	-0.412163
33307_at	-0.285428	-0.244663	-4.13938	0.000691164	0.263516	-0.412581	RRP7A, RRP7BP	27341, 91695
236390_at	-0.312714	-0.189216	-4.13845	0.00069254	0.263582	-0.414498	SLX4IP	128710
215331_at	0.586086	0.62857	4.13809	0.000693075	0.263582	-0.415241	MYH15	22989
53071_s_at	-0.393242	-0.369344	-4.1364	0.000695614	0.264327	-0.418765	OGFOD3	79701
238465_at	-0.47649	-0.232189	-4.1351	0.000697574	0.26485	-0.421475	SETD9	133383
51146_at	0.423604	0.205723	4.1326	0.000701342	0.265174	-0.426666	PIGV	55650
214662_at	-0.287623	-0.155302	-4.12945	0.000706123	0.2661	-0.433212	WDR43	23160
202795_x_at	0.409351	0.238508	4.12899	0.000706818	0.2661	-0.43416	TRIOBP	11078
225905_s_at	0.400475	0.176548	4.12867	0.000707302	0.2661	-0.434819	ST3GAL3	6487
234942_s_at	-0.291544	-0.163876	-4.12787	0.000708531	0.266122	-0.436492	DNTTIP1	116092
1555281_x_at	-0.413535	-0.202394	-4.12488	0.000713121	0.267185	-0.442713	ARMC8	25852
234347_s_at	-0.46774	-0.209676	-4.11757	0.000724446	0.268639	-0.457892
229095_s_at	0.404482	0.205915	4.10444	0.000745271	0.274482	-0.485191		440895, 100507334
237435_at	0.694454	-0.0533929	4.1038	0.000746297	0.274637	-0.486516
214106_s_at	-0.35918	-0.242312	-4.10135	0.00075025	0.275578	-0.491605	GMDS	2762
236153_at	-0.550158	-0.325651	-4.10122	0.000750474	0.275578	-0.491892
225114_at	-0.36645	-0.182407	-4.09856	0.000754796	0.275979	-0.497423	AGPS	8540
227263_at	0.377036	-0.0932609	4.09764	0.000756296	0.276084	-0.499336	C8orf58	541565
206205_at	-0.333181	-0.219669	-4.09478	0.000760977	0.276819	-0.505278	MPHOSPH9	10198
200886_s_at	0.288996	-0.0908349	4.09455	0.000761353	0.276819	-0.505753	PGAM1, PGAM4,	5223, 441531
203448_s_at	-0.286675	-0.108982	-4.08941	0.000769846	0.278792	-0.516437	TERF1P5, TERF1P1, TERF1P4, TERF1,	7013
201510_at	-0.41727	-0.225448	-4.08782	0.0007725	0.279309	-0.519752	ELF3,	1999
1564407_a_at	-0.329786	-0.169913	-4.08645	0.000774789	0.279692	-0.522601
1554168_a_at	0.483838	0.471525	4.0831	0.000780398	0.281112	-0.529547	SH3KBP1	30011
209191_at	0.359127	-0.0626081	4.08165	0.000782849	0.281484	-0.532567	TUBB6	84617
230532_at	-0.379519	-0.260169	-4.08043	0.000784926	0.281749	-0.535118	CXorf38	159013
240259_at	0.581752	-0.270125	4.06079	0.00081893	0.290327	-0.575954	FLRT2	23768
219567_s_at	-0.613068	-0.352237	-4.05124	0.000835996	0.294062	-0.595809	EXO5	64789
205945_at	0.36062	0.189314	4.05117	0.00083612	0.294062	-0.595952	IL6R	3570
204664_at	0.320752	0.182762	4.04797	0.000841922	0.294408	-0.602609	ALPP	250
219205_at	-0.395382	-0.182865	-4.04532	0.000846759	0.295081	-0.608123	SRR	63826
215358_x_at	-0.476435	-0.266497	-4.03993	0.000856674	0.297372	-0.619329	ZNF37BP	100129482
241499_at	-0.394747	-0.230519	-4.03969	0.000857131	0.297372	-0.619842	ZNF621	285268
1569241_a_at	-0.48514	-0.0973597	-4.03929	0.000857863	0.297372	-0.620664	ZNF93	81931
226259_at	-0.437634	-0.254545	-4.03827	0.000859762	0.297611	-0.622793	EXOC6	54536
203944_x_at	-0.295803	-0.125602	-4.03342	0.000868814	0.298699	-0.632874	BTN2A1	11120
208747_s_at	0.432257	0.120249	4.0318	0.000871866	0.299087	-0.636248	C1S	716
219470_x_at	-0.321613	-0.0484215	-4.03177	0.000871916	0.299087	-0.636303	CCNJ	54619
202150_s_at	0.409873	0.291332	4.02285	0.000888888	0.302853	-0.654857	NEDD9	4739
238044_at	0.803561	0.43758	4.01581	0.00090252	0.304985	-0.669503
236347_at	-0.492129	-0.116419	-4.01429	0.000905494	0.305763	-0.672669	MMAA	166785
203304_at	0.619075	0.316381	4.00144	0.000930998	0.309069	-0.699395	BAMBI	25805
238151_at	-0.511802	0.080964	-4.00047	0.000932951	0.309069	-0.701412
225432_s_at	-0.40659	-0.195936	-3.99578	0.000942459	0.311312	-0.711166	KAT14	57325
201236_s_at	0.382159	0.149084	3.98802	0.000958423	0.313738	-0.727326	BTG2	7832
239282_at	-0.540525	-0.39212	-3.97618	0.000983273	0.318547	-0.751947	CEP83	51134
229283_at	-0.350714	-0.25811	-3.97375	0.000988461	0.319318	-0.757009
242261_at	-0.542064	-0.284625	-3.97134	0.000993633	0.320534	-0.762028	IREB2	3658
1554915_a_at	-0.411093	-0.148121	-3.97031	0.000995852	0.320794	-0.764174	PDE12	201626
224797_at	0.468124	-0.322966	3.96694	0.00100313	0.32106	-0.771177	ARRDC3	57561
203359_s_at	-0.565844	-0.361181	-3.95855	0.00102151	0.323403	-0.788636	, MYCBP	26292
220083_x_at	-0.465111	-0.214997	-3.95615	0.00102683	0.324434	-0.793632	UCHL5	51377
211795_s_at	0.875435	0.377226	3.9509	0.00103854	0.326681	-0.80454	FYB	2533
216685_s_at	-0.309535	-0.255916	-3.92943	0.00108796	0.335269	-0.849229	MTAP	4507
210561_s_at	0.362565	-0.0219242	3.92459	0.0010994	0.337109	-0.859289	WSB1	26118
206280_at	-0.364756	0.0980537	-3.92398	0.00110086	0.337189	-0.860563	CDH18	1016
209715_at	-0.376193	-0.24871	-3.92052	0.00110914	0.338585	-0.867765	CBX5	23468, 100616400
204549_at	0.30766	-0.0698724	3.91988	0.00111066	0.338595	-0.869083	IKBKE	9641
213940_s_at	-0.341471	-0.245378	-3.91847	0.00111407	0.339407	-0.872028	FNBP1	23048
225978_at	-0.42559	-0.291581	-3.91525	0.00112187	0.340884	-0.878732	RIMKLB	57494
1562606_a_at	0.358117	-0.0545388	3.90805	0.00113949	0.344154	-0.893709		440028
210087_s_at	-0.256665	-0.219286	-3.90725	0.00114147	0.344522	-0.895374	MPZL1	9019
230974_at	-0.377208	-0.316484	-3.90633	0.00114374	0.344732	-0.897287	DDX19B	11269
222844_s_at	-0.55637	-0.282961	-3.90392	0.00114972	0.345864	-0.902293	SRR	63826
223469_at	0.364104	0.299848	3.90258	0.00115306	0.346514	-0.90508	PGPEP1	54858
229091_s_at	-0.325501	-0.0719412	-3.90203	0.00115442	0.346592	-0.906218	CCNJ	54619
228493_at	-0.362623	-0.238328	-3.90132	0.0011562	0.346897	-0.907696	NKAP	79576
229075_at	-0.458809	-0.17296	-3.89812	0.00116425	0.347707	-0.914364	SPATA5	166378
210630_s_at	-0.513433	-0.168936	-3.89723	0.0011665	0.348149	-0.916215	RAD52	5893
225953_at	-0.311105	0.00588837	-3.89553	0.00117079	0.3492	-0.919742	RPRD1A	55197
1553322_s_at	-0.334861	-0.163886	-3.89271	0.00117796	0.350421	-0.925611	TEAD1	7003
227067_x_at	-0.304915	-0.280261	-3.88637	0.00119426	0.353077	-0.938812	NBPF26, NBPF19, NOTCH2, NBPF14, NOTCH2NL,	101060226, 4853, 25832, 100996763, 388677
1553167_a_at	-0.441375	-0.157632	-3.88576	0.00119584	0.353179	-0.940082	SEPSECS	51091
219472_at	-0.523341	-0.229469	-3.88548	0.00119655	0.353179	-0.940654	CENPO	79172
210512_s_at	0.490353	0.387986	3.88186	0.00120597	0.354808	-0.948188	VEGFA	7422
236198_at	1.04497	0.460075	3.88059	0.00120929	0.355048	-0.950832	LINC01215	101929623
214144_at	-0.34484	-0.216807	-3.88035	0.00120991	0.355048	-0.95132	, POLR2D	5433
209716_at	0.471032	0.0477659	3.87879	0.001214	0.355115	-0.954565	CSF1	1435
213447_at	-0.282567	0.00803335	-3.86399	0.00125355	0.360582	-0.98536	SNHG14
241434_at	-0.420814	-0.289766	-3.86373	0.00125426	0.360582	-0.985899
204472_at	0.756415	0.745587	3.86353	0.0012548	0.360582	-0.986313	GEM	2669
226060_at	-0.281212	-0.20357	-3.85942	0.00126602	0.36194	-0.994862	RFT1	91869
203816_at	-0.265029	-0.218679	-3.84043	0.00131918	0.371648	-1.03436	DGUOK	1716
215629_s_at	-0.46285	-0.724779	-3.83732	0.00132811	0.372893	-1.04083	DLEU2, DLEU2L	406948
244743_x_at	-0.413418	-0.351678	-3.83495	0.00133495	0.373938	-1.04577	ZNF138	7697
1553348_a_at	-0.418597	-0.15211	-3.83052	0.00134782	0.376107	-1.05498	NFX1	4799
1556088_at	-0.505749	-0.346109	-3.82977	0.00135001	0.376485	-1.05653	RPAIN	84268
231730_at	-0.399589	-0.189208	-3.82841	0.001354	0.377223	-1.05937	SEPSECS	51091
209344_at	0.415245	-0.0808089	3.82131	0.00137498	0.379199	-1.07412	TPM4,	7171
228757_at	0.346264	0.20653	3.81745	0.00138652	0.381753	-1.08215	HSD11B1L	374875
225691_at	-0.361004	-0.192421	-3.81658	0.00138916	0.382009	-1.08397	CDK12	51755
230720_at	-0.371927	0.155147	-3.81631	0.00138997	0.382009	-1.08453	RNF182	221687
209938_at	-0.400883	-0.310262	-3.81437	0.00139581	0.382183	-1.08856	TADA2A	6871
1558689_a_at	-0.35353	-0.00974728	-3.81382	0.00139747	0.382183	-1.0897	STX17-AS1	441461
204901_at	-0.340378	-0.164447	-3.80843	0.0014139	0.385095	-1.10091	BTRC	8945
201106_at	-0.379641	0.0536379	-3.8074	0.00141707	0.385267	-1.10306	GPX4	2879
208319_s_at	-0.352697	-0.522886	-3.80594	0.00142156	0.385795	-1.1061	RBM3	5935
222266_at	-0.352559	-0.263023	-3.80382	0.00142809	0.386416	-1.1105
205390_s_at	-0.370923	-0.246314	-3.8031	0.00143031	0.386645	-1.11198	ANK1	286
219703_at	-0.575154	-0.408225	-3.79597	0.0014526	0.391677	-1.12682	MNS1	55329
226440_at	0.445343	0.281895	3.7938	0.00145943	0.393026	-1.13133	DUSP22	56940
225625_at	-0.296777	-0.170564	-3.78937	0.00147352	0.395579	-1.14054	ALKBH2	121642
215672_s_at	-0.301058	0.203234	-3.78538	0.00148632	0.396875	-1.14884	AHCYL2	23382
225291_at	-0.31951	-0.185565	-3.78408	0.00149052	0.39763	-1.15154	PNPT1	87178
202309_at	-0.27279	-0.20275	-3.78154	0.00149874	0.39872	-1.15682	MTHFD1	4522
209470_s_at	-0.626933	-0.317481	-3.78146	0.00149899	0.39872	-1.15698	GPM6A	2823
217647_at	-0.39444	-0.333409	-3.77963	0.00150493	0.399367	-1.16078	DHODH	1723
241569_at	-0.623404	-0.453376	-3.77729	0.00151259	0.400232	-1.16564
241393_at	-0.397002	-0.304115	-3.77209	0.00152973	0.402157	-1.17645	, IPP	3652
241885_at	-0.441391	-0.356211	-3.77064	0.00153457	0.402157	-1.17948
205063_at	-0.349208	-0.149782	-3.77063	0.00153459	0.402157	-1.1795	GEMIN2	8487
212980_at	-0.489361	-0.432687	-3.77031	0.00153564	0.402157	-1.18015	AHSA2	130872
1555731_a_at	-0.426306	-0.187742	-3.77027	0.00153578	0.402157	-1.18024	AP1S3	130340
209806_at	0.286103	0.226599	3.76809	0.00154305	0.403026	-1.18476
232257_s_at	-0.657334	-0.32278	-3.7677	0.00154435	0.403026	-1.18558
222453_at	0.441538	0.24417	3.76768	0.00154442	0.403026	-1.18561	CYBRD1	79901
233070_at	-0.333746	-0.158875	-3.76634	0.00154891	0.403506	-1.1884	ZNF197	10168
230306_at	-0.288907	-0.182802	-3.75623	0.00158322	0.40718	-1.20941	VPS26B	112936
223268_at	-0.446071	0.0861401	-3.75559	0.00158545	0.40718	-1.21076	C11orf54	28970
220216_at	-0.49825	-0.219416	-3.75482	0.00158809	0.40718	-1.21235	C8orf44	56260
202886_s_at	-0.402918	-0.193789	-3.75156	0.00159932	0.408739	-1.21911	PPP2R1B	5519
241418_at	0.357227	0.202379	3.74739	0.00161385	0.410545	-1.22778
201389_at	0.499129	0.288611	3.7465	0.00161697	0.41111	-1.22963	ITGA5	3678
213983_s_at	-0.287841	-0.205843	-3.74367	0.00162693	0.41331	-1.23552	PDS5A	23244
224450_s_at	-0.333678	-0.163621	-3.74197	0.00163291	0.414238	-1.23904	RIOK1	83732
230556_at	-0.461107	-0.309863	-3.74021	0.00163918	0.415133	-1.24271	IMMP1L	196294
226046_at	-0.365953	-0.22685	-3.73832	0.0016459	0.41594	-1.24663	MAPK8	5599
1554841_at	-0.407	-0.16681	-3.73828	0.00164602	0.41594	-1.2467	MTHFD2L	441024
231062_at	0.477319	0.274588	3.73315	0.00166445	0.418503	-1.25737	DOCK9-AS2
204469_at	1.26098	-0.00836194	3.73231	0.00166748	0.418785	-1.25911	PTPRZ1	5803
205796_at	-0.46705	-0.271127	-3.73198	0.00166866	0.418785	-1.25979	TCP11L1	55346
228180_at	-0.378713	-0.211932	-3.72922	0.00167869	0.419978	-1.26553
208506_at	-0.471803	-0.338245	-3.72848	0.00168137	0.419978	-1.26707	HIST1H3F	8968
1555758_a_at	-0.323312	-0.295641	-3.72845	0.0016815	0.419978	-1.26714	CDKN3	1033
1559658_at	-0.537348	-0.395064	-3.72758	0.00168465	0.420099	-1.26893	KATNBL1	79768
219204_s_at	-0.460175	-0.21188	-3.72322	0.00170064	0.422645	-1.27799	SRR	63826
203830_at	-0.303092	-0.153758	-3.72273	0.00170244	0.422645	-1.279	C17orf75	64149
1554099_a_at	-0.276099	0.108469	-3.72263	0.00170282	0.422645	-1.27921	SPIN3	169981
220673_s_at	-0.50947	0.165113	-3.71699	0.00172377	0.426116	-1.29093	PPP4R4	57718
242812_at	-0.346915	-0.177677	-3.7154	0.00172973	0.426827	-1.29424	HCG18
228092_at	-0.379422	-0.224958	-3.71264	0.00174011	0.428294	-1.29997	CREM	1390
212922_s_at	0.278391	-0.11282	3.712	0.0017425	0.428504	-1.30129	SMYD2	56950
1556029_s_at	0.488982	-0.0457461	3.70958	0.00175167	0.429041	-1.30631	NMNAT2	23057
231327_at	-0.278972	-0.0777931	-3.70148	0.00178271	0.433332	-1.32314
215417_at	-0.292646	-0.180304	-3.69807	0.00179594	0.435329	-1.33022	EXOC6B	23233
230003_at	-0.506317	-0.238367	-3.69774	0.00179722	0.435329	-1.33091	SLC16A7	9194
211686_s_at	-0.236268	-0.161756	-3.69478	0.00180878	0.43692	-1.33705	MAK16	84549
1558053_s_at	-0.333169	-0.141628	-3.6921	0.00181932	0.437838	-1.34261
205126_at	-0.256518	-0.0782397	-3.68692	0.00183987	0.442316	-1.35337	VRK2	7444
225108_at	-0.438582	-0.304501	-3.681	0.00186361	0.445669	-1.36565	AGPS	8540
222705_s_at	-0.314001	-0.264731	-3.67862	0.00187325	0.447268	-1.37059	SLC25A15	10166
203065_s_at	0.247999	-0.138305	3.67691	0.00188018	0.448452	-1.37412	CAV1	857
211721_s_at	-0.43603	-0.26824	-3.67392	0.00189243	0.450242	-1.38034	ZNF551	90233
1555854_at	0.753833	1.41605	3.67345	0.00189436	0.450242	-1.38132	AKR1C1, AKR1C2	1645, 1646
206118_at	0.528143	0.380916	3.6724	0.00189865	0.450731	-1.38348	STAT4	6775
230991_at	0.449304	-0.10723	3.67134	0.00190302	0.451296	-1.38568
1569144_a_at	-0.328702	0.160845	-3.66915	0.00191209	0.451922	-1.39023	CYSRT1	375791
202547_s_at	-0.308159	-0.137231	-3.66902	0.00191261	0.451922	-1.3905	ARHGEF7	8874
214874_at	-0.343616	-0.31157	-3.66694	0.00192129	0.453264	-1.39483	PKP4	8502
1556210_at	-0.346441	-0.315235	-3.66248	0.00193995	0.456248	-1.40408
224825_at	-0.261551	-0.115621	-3.65448	0.00197385	0.462546	-1.42066	DNTTIP1	116092
1554158_at	-0.378754	-0.138348	-3.65212	0.001984	0.463817	-1.42557	ZMYND11	10771
221020_s_at	-0.315894	-0.177722	-3.64686	0.00200671	0.46688	-1.43647	SLC25A32	81034
208926_at	0.489708	0.369899	3.64618	0.00200967	0.467329	-1.43787	NEU1	4758
1564383_s_at	0.432054	-0.115866	3.64297	0.00202373	0.468822	-1.44455		400579
44783_s_at	0.944699	0.627556	3.63709	0.00204965	0.472999	-1.45672	HEY1	23462
214855_s_at	-0.314802	0.0557991	-3.6324	0.00207061	0.475903	-1.46646	RALGAPA1, RALGAPA1P1	253959
202957_at	0.433308	-0.07986	3.63104	0.00207672	0.476345	-1.46927	HCLS1	3059
226158_at	0.380626	0.368195	3.6304	0.00207959	0.476523	-1.4706	KLHL24	54800
36475_at	-0.343755	-0.226693	-3.62971	0.00208269	0.476575	-1.47202	GCAT	23464
209922_at	-0.265224	-0.0604671	-3.62255	0.00211527	0.480104	-1.48687	BRAP	8315
212411_at	-0.277763	-0.162058	-3.62126	0.00212119	0.48025	-1.48955	IMP4	92856
229933_at	-0.372823	-0.2582	-3.62029	0.00212565	0.480779	-1.49155	C1orf74	148304
202144_s_at	-0.30608	-0.17171	-3.61961	0.00212878	0.481248	-1.49296	ADSL	158
227565_at	0.416144	0.0986191	3.61905	0.00213137	0.481595	-1.49412
209120_at	0.52616	-0.146483	3.61734	0.0021393	0.482189	-1.49768	NR2F2	7026, 100302258
229587_at	-0.281347	-0.155271	-3.61676	0.00214196	0.482311	-1.49886	UBA2	10054
242037_at	0.379542	0.50608	3.61258	0.00216147	0.485263	-1.50754	ASPH	444
200602_at	0.324961	0.13522	3.60592	0.00219286	0.489938	-1.52132	APP	351
201519_at	-0.257631	-0.198682	-3.60518	0.00219641	0.489963	-1.52287	TOMM70	9868
223308_s_at	-0.321716	-0.219209	-3.60182	0.00221244	0.492546	-1.52982	WDR5	11091
219017_at	-0.302214	0.108953	-3.60137	0.00221462	0.492574	-1.53076	ETNK1	55500
1569322_at	-0.248776	-0.206624	-3.59482	0.00224627	0.496656	-1.54433	LINC00857	439990
229106_at	-0.267208	-0.185918	-3.59463	0.00224716	0.496656	-1.54471	DYNLL2	140735
224444_s_at	-0.443781	-0.256659	-3.59303	0.002255	0.497339	-1.54804	LINC00467
220237_at	-0.385753	-0.287597	-3.5924	0.00225806	0.497373	-1.54933	ATG3	64422
1564371_a_at	-0.5735	-0.351433	-3.59027	0.00226852	0.498863	-1.55375	CASC2	255082
221576_at	0.490968	0.233048	3.58204	0.0023093	0.504023	-1.57078
211091_s_at	-0.287589	-0.33318	-3.57877	0.0023257	0.505902	-1.57754	NF2	4771
212026_s_at	-0.323563	-0.149706	-3.57364	0.00235173	0.509373	-1.58818	EXOC7	23265
212977_at	0.504701	0.476834	3.57305	0.0023547	0.509399	-1.58939	ACKR3	57007
207388_s_at	-0.402074	0.141606	-3.56948	0.00237299	0.511624	-1.59678	PTGES	9536
221598_s_at	-0.331594	-0.185518	-3.56919	0.0023745	0.511624	-1.59739	MED27	9442
218512_at	-0.257563	-0.103757	-3.56849	0.0023781	0.511914	-1.59883	WDR12	55759
1554445_at	-0.470966	-0.322363	-3.56527	0.00239476	0.514526	-1.6055	ZNF85	7639
229980_s_at	-0.240741	-0.208807	-3.56269	0.00240814	0.515697	-1.61083	, SNX5	27131
215215_s_at	-0.510051	-0.521329	-3.56176	0.002413	0.516073	-1.61275		81691
209016_s_at	0.391024	-0.0669999	3.55481	0.0024496	0.520097	-1.62713	KRT7	3855
205486_at	-0.423484	0.0903615	-3.55466	0.00245042	0.520097	-1.62745	TESK2	10420
227052_at	0.388329	0.429277	3.54734	0.00248957	0.525708	-1.64259	SMIM14	201895
215411_s_at	0.258434	0.158129	3.54687	0.00249208	0.525995	-1.64355	TRAF3IP2	10758
218953_s_at	-0.481646	-0.253331	-3.5357	0.00255309	0.532933	-1.66665	PCYOX1L	78991
224233_s_at	-0.250736	-0.128181	-3.53466	0.00255884	0.532933	-1.6688	MSTO2P, MSTO1	55154
209469_at	-0.512313	-0.370049	-3.5342	0.00256142	0.532933	-1.66976	GPM6A	2823
203637_s_at	-0.254335	0.043009	-3.53412	0.00256184	0.532933	-1.66992	MID1	4281
241906_at	-0.348253	-0.14756	-3.53173	0.00257512	0.534348	-1.67485
227192_at	-0.28819	0.0417485	-3.52798	0.00259614	0.536371	-1.68261	PRRT2, PAGR1	112476, 79447
226140_s_at	0.518876	0.290266	3.52759	0.00259831	0.536371	-1.68341	OTUD1	220213
225712_at	-0.331014	-0.172769	-3.52753	0.00259864	0.536371	-1.68353	GEMIN5	25929
216652_s_at	-0.273192	-0.113561	-3.52335	0.00262231	0.539559	-1.69219	DR1	1810
219534_x_at	0.710117	0.600716	3.52211	0.00262935	0.540137	-1.69475	CDKN1C	1028
226998_at	-0.291643	-0.302772	-3.52099	0.00263573	0.540512	-1.69706	NAA15	80155
220682_s_at	-0.3735	0.0772791	-3.52028	0.00263976	0.540772	-1.69852
1554486_a_at	-0.380058	-0.347329	-3.52014	0.00264056	0.540772	-1.69881	GFOD1	54438
225073_at	-0.29789	-0.197117	-3.51539	0.00266789	0.544408	-1.70864	PPHLN1	51535
1555679_a_at	-0.340918	-0.203083	-3.51115	0.00269249	0.54735	-1.7174	RTN4IP1	84816
214764_at	-0.34782	-0.271865	-3.51105	0.00269303	0.54735	-1.71759	RRP15	51018
215190_at	-0.335317	-0.235413	-3.50969	0.002701	0.548702	-1.7204	EIF3M	10480
219938_s_at	-0.469755	-0.305698	-3.50787	0.00271164	0.550128	-1.72416	PSTPIP2	9050
203647_s_at	-0.279195	-0.14421	-3.50638	0.0027204	0.551168	-1.72724	FDX1, FDX1P1	2230
239587_at	0.600173	-0.00658462	3.5026	0.00274275	0.553723	-1.73504	TLR3	7098
218722_s_at	-0.251418	-0.119873	-3.49954	0.00276099	0.555923	-1.74136	CCDC51	79714
230927_at	-0.591853	-0.446948	-3.49699	0.00277629	0.558309	-1.74664
212334_at	0.319679	0.199512	3.49655	0.00277894	0.558548	-1.74755	GNS	2799
239790_s_at	-0.321777	-0.181301	-3.49504	0.00278799	0.559469	-1.75065
239960_x_at	-0.510458	-0.376297	-3.4908	0.0028137	0.562306	-1.75941
223974_at	0.492395	0.343875	3.48511	0.00284856	0.564804	-1.77115	DLGAP1-AS2
222931_s_at	-0.393418	-0.231872	-3.4836	0.00285789	0.566076	-1.77427	THNSL1	79896
210282_at	-0.435907	-0.263734	-3.48347	0.0028587	0.566076	-1.77454	ZMYM2	7750
210827_s_at	-0.356607	-0.110381	-3.48044	0.0028775	0.567575	-1.78079	ELF3,	1999
239768_x_at	-0.469459	-0.285589	-3.47756	0.00289545	0.569515	-1.78672	GPATCH2	55105
218266_s_at	0.260999	-0.0643568	3.47228	0.00292877	0.571002	-1.79763	NCS1	23413
239482_x_at	-0.374888	-0.180906	-3.46929	0.00294773	0.573713	-1.80378	ZNF708	7562
207022_s_at	0.3202	-0.107932	3.46629	0.00296696	0.576225	-1.80998	LDHC	3948
227575_s_at	-0.265672	-0.151666	-3.46471	0.00297713	0.577325	-1.81324	NRDE2	55051
201174_s_at	-0.238124	0.081126	-3.46286	0.00298904	0.578836	-1.81705	TERF2IP	54386
207654_x_at	-0.218506	-0.0846874	-3.46282	0.00298931	0.578836	-1.81714	DR1	1810
1557285_at	0.5765	-0.279909	3.46215	0.00299361	0.579175	-1.81851
222438_at	-0.399498	-0.254928	-3.46062	0.00300356	0.580358	-1.82167	MED4	29079
202377_at	0.316884	0.179768	3.45966	0.00300982	0.580859	-1.82365	LEPROT	54741
222417_s_at	-0.30021	-0.266529	-3.45855	0.00301707	0.58158	-1.82594	SNX5	27131
244623_at	-0.477201	-0.268727	-3.45776	0.00302222	0.581736	-1.82757	KCNQ5	56479
212171_x_at	0.348327	0.32978	3.45671	0.00302904	0.581736	-1.82972	VEGFA	7422
244354_at	-0.423865	-0.270606	-3.45382	0.00304808	0.583263	-1.83569	, STRN	6801
225429_at	-0.265793	-0.249043	-3.44942	0.00307718	0.58661	-1.84475	PPP6C	5537
229842_at	-0.487641	-0.335484	-3.44777	0.00308823	0.587362	-1.84816	ELF3	1999
204679_at	0.2221	0.179967	3.44745	0.00309031	0.587362	-1.8488	KCNK1	3775
215243_s_at	0.404486	0.269276	3.44742	0.00309056	0.587362	-1.84888	GJB3	2707
1566256_s_at	-0.308513	-0.250327	-3.44696	0.00309365	0.587532	-1.84983
202378_s_at	0.344955	0.223589	3.44651	0.00309663	0.587853	-1.85075	LEPROT	54741
206662_at	-0.562734	0.252483	-3.43744	0.00315796	0.59552	-1.86944	GLRX	2745
227349_at	-0.321938	-0.405817	-3.43524	0.00317304	0.596633	-1.87397	, HELLS	3070
228466_at	0.392456	-0.170918	3.43197	0.00319552	0.599999	-1.8807	GABPB2	126626
224693_at	0.343342	0.22781	3.43002	0.00320901	0.600664	-1.88471	FAM210B	116151
207627_s_at	-0.337444	-0.171205	-3.42718	0.00322881	0.602119	-1.89057	TFCP2	7024
213943_at	0.543063	0.227497	3.42614	0.00323605	0.602995	-1.8927	TWIST1	7291
215357_s_at	-0.356465	-0.201011	-3.42087	0.00327315	0.604573	-1.90356	POLDIP3	84271
235509_at	-0.272805	-0.190718	-3.42069	0.00327439	0.604573	-1.90392	NDUFAF6	137682
223773_s_at	-0.298799	-0.181545	-3.41843	0.00329042	0.606419	-1.90857	SNHG12	85028
203664_s_at	-0.240531	-0.144532	-3.41559	0.00331069	0.6082	-1.91442	, POLR2D	5433
1565975_at	-0.328745	-0.427432	-3.41022	0.00334934	0.611916	-1.92546
238542_at	-0.380495	0.114024	-3.40981	0.00335231	0.611916	-1.92631	ULBP2	80328
227476_at	-0.323299	-0.233566	-3.40909	0.00335755	0.612257	-1.9278	LPGAT1	9926
219587_at	-0.421845	-0.288161	-3.40551	0.00338364	0.614634	-1.93517	TTC12	54970
219865_at	-0.243128	-0.204464	-3.39797	0.00343915	0.620563	-1.95065	LINC00339	29092
242424_at	-0.389249	-0.28314	-3.39223	0.00348208	0.626758	-1.96246
242639_at	-0.430283	-0.43622	-3.38917	0.0035052	0.629176	-1.96875	ICE2	79664
228941_at	-0.541163	-0.432851	-3.38657	0.00352492	0.631222	-1.97409	ALG10B	144245
238135_at	0.556524	0.324507	3.386	0.00352926	0.631544	-1.97526	AGTRAP	57085
221290_s_at	-0.421284	-0.256386	-3.38305	0.00355181	0.632924	-1.98132	MUM1	84939
205239_at	0.277545	-0.135003	3.38237	0.00355706	0.633228	-1.98273	AREG	374
230757_at	-0.348499	-0.330458	-3.37951	0.00357907	0.635872	-1.9886
226030_at	-0.605563	-0.335055	-3.37896	0.00358333	0.636173	-1.98973	ACADSB	36
1555279_at	-0.387617	-0.210459	-3.37338	0.0036268	0.641386	-2.0012	ARMC8	25852
200777_s_at	0.243823	7.20512e-05	3.37295	0.00363015	0.641728	-2.00207	BZW1	9689
236981_at	0.585425	0.375459	3.37224	0.00363572	0.641965	-2.00353	C17orf99	100141515
226990_at	-0.279517	-0.229508	-3.37075	0.00364744	0.643284	-2.00659	CAPRIN1	4076
222222_s_at	0.273724	0.195484	3.3594	0.00373795	0.65225	-2.0299	, HOMER3	9454
229021_at	0.31824	0.173588	3.35934	0.00373842	0.65225	-2.03002	MCTP2	55784
220012_at	-0.344573	0.196494	-3.35741	0.00375398	0.653767	-2.03397	ERO1B	56605
1560498_at	0.628409	0.60299	3.35566	0.00376824	0.65494	-2.03757
224359_s_at	-0.249195	-0.173401	-3.35308	0.00378924	0.656834	-2.04286	HOOK3	84376
208622_s_at	-0.239119	-0.165974	-3.35028	0.00381219	0.65801	-2.0486	EZR	7430
201327_s_at	-0.253808	-0.165722	-3.35028	0.0038122	0.65801	-2.0486	CCT6A	908
222152_at	-0.339764	-0.202396	-3.34805	0.00383058	0.659476	-2.05317
205995_x_at	-0.294103	-0.134329	-3.34684	0.00384065	0.659857	-2.05567	IQCB1	9657
213187_x_at	0.322472	0.233942	3.34426	0.00386207	0.662327	-2.06095	, FTL, FTLP3	2512
201323_at	-0.230689	-0.188936	-3.34247	0.00387699	0.663448	-2.06462	EBNA1BP2	10969, 102465439
209507_at	-0.271723	-0.215014	-3.34168	0.00388363	0.663584	-2.06624	RPA3	6119
205664_at	-0.414133	-0.212818	-3.34025	0.00389562	0.664883	-2.06917	KIN	22944
1555284_at	0.487376	0.300555	3.33971	0.00390017	0.665411	-2.07028	ALS2	57679
221581_s_at	0.527983	0.370554	3.33661	0.00392631	0.668627	-2.07663	LAT2	7462
212494_at	0.251826	0.12381	3.33459	0.00394347	0.670034	-2.08077	TNS2	23371
236958_at	-0.355402	-0.144534	-3.33394	0.00394904	0.67048	-2.08211
210824_at	0.298707	0.138315	3.33365	0.00395146	0.670639	-2.0827
229519_at	-0.341392	-0.185963	-3.32931	0.00398871	0.675588	-2.09161	FXR1	8087
238565_at	-0.311255	-0.116905	-3.32734	0.00400567	0.676574	-2.09564	PUS7L	83448
208290_s_at	-0.409479	-0.205661	-3.32359	0.00403814	0.680172	-2.10331	EIF5	1983
220526_s_at	-0.317219	-0.246186	-3.32195	0.00405245	0.681424	-2.10667	MRPL20	55052
242932_at	-0.457566	-0.365842	-3.31155	0.0041444	0.689816	-2.12798
243008_at	-0.483571	-0.333089	-3.30375	0.00421468	0.697083	-2.14394
235940_at	-0.273074	-0.168328	-3.29861	0.00426164	0.702318	-2.15446	C9orf64	84267
226649_at	0.386374	0.276793	3.2974	0.00427273	0.703269	-2.15693	PANK1	53354
229553_at	-0.331676	0.192119	-3.29147	0.00432774	0.709102	-2.16907	PGM2L1	283209
219644_at	-0.346338	-0.185297	-3.28916	0.00434928	0.711997	-2.17378	CEP83	51134
204647_at	0.350314	0.177509	3.28829	0.00435743	0.71232	-2.17556	HOMER3	9454
229981_at	-0.364	-0.46517	-3.28806	0.00435957	0.71232	-2.17602	SNX5	27131
205122_at	0.296668	0.0554618	3.28787	0.00436141	0.71232	-2.17642	TMEFF1, MSANTD3-TMEFF1	8577
242710_at	0.284713	0.165668	3.28786	0.00436148	0.71232	-2.17643
211547_s_at	-0.421487	-0.386107	-3.28559	0.00438286	0.714018	-2.18108	PAFAH1B1	5048
201576_s_at	0.305404	0.22081	3.28515	0.004387	0.714436	-2.18197	GLB1	2720
225684_at	-0.306218	-0.239394	-3.28038	0.00443236	0.720275	-2.19173	SKA2	348235
229395_at	0.736121	0.485639	3.27673	0.00446733	0.723631	-2.19919	STX4	6810
225897_at	0.489873	-0.299924	3.27649	0.00446968	0.723754	-2.19968	MARCKS	4082
204835_at	-0.240163	-0.212971	-3.27165	0.00451647	0.728542	-2.20956	POLA1	5422
225510_at	0.26675	0.11766	3.27046	0.00452802	0.728543	-2.21199	OAF	220323
229533_x_at	-0.336513	-0.229277	-3.26754	0.00455661	0.731402	-2.21795	ZNF680	340252
232323_s_at	-0.330851	0.16213	-3.26673	0.00456456	0.731932	-2.21961	TTC17	55761
37547_at	0.339209	0.254357	3.26671	0.00456473	0.731932	-2.21964	BBS9	27241
234685_x_at	0.359413	-0.111238	3.2622	0.00460934	0.734343	-2.22886	KRTAP4-9	100132386
207732_s_at	-0.336737	-0.221574	-3.26001	0.00463109	0.736121	-2.23333	DLG3	1741
235543_at	-0.354981	-0.290322	-3.25955	0.0046357	0.736307	-2.23427
242907_at	-0.32273	-0.149603	-3.25917	0.00463947	0.736307	-2.23504	GBP2	2634
208787_at	-0.226193	-0.156067	-3.25841	0.00464708	0.737258	-2.2366	MRPL3	11222
225422_at	0.29572	0.201147	3.25628	0.00466846	0.739206	-2.24095	CDC26,	246184
1570153_at	-0.288679	-0.329523	-3.25621	0.00466911	0.739206	-2.24108	CCDC169	728591
209504_s_at	-0.325639	0.186038	-3.25548	0.00467645	0.739595	-2.24257	PLEKHB1	58473
239680_at	-0.351772	-0.437962	-3.25196	0.00471206	0.743155	-2.24976	WDR76	79968
223482_at	0.225078	0.22826	3.25186	0.00471302	0.743155	-2.24995	TMEM120A	83862
221213_s_at	-0.46855	-0.20927	-3.25059	0.00472594	0.74355	-2.25255	ZNF280D	54816, 145783
219078_at	-0.363572	-0.310117	-3.25053	0.00472654	0.74355	-2.25267	GPATCH2	55105
206068_s_at	-0.364821	-0.302435	-3.24833	0.00474896	0.74459	-2.25715	ACADL	33
228714_at	0.362673	-0.0861087	3.24382	0.00479534	0.748704	-2.26636
214850_at	-0.396401	-0.229232	-3.24254	0.00480855	0.749798	-2.26897
223515_s_at	-0.261744	-0.166042	-3.23379	0.00489994	0.75627	-2.28681	COQ3	51805
209276_s_at	-0.558875	0.253269	-3.23257	0.00491275	0.756711	-2.28928	GLRX	2745
220672_at	-0.497108	0.15049	-3.2321	0.00491771	0.757215	-2.29024	PPP4R4	57718
227993_at	-0.421152	-0.448435	-3.23149	0.00492413	0.757596	-2.29147	METAP2	10988
208510_s_at	0.328941	0.179876	3.23092	0.00493023	0.758116	-2.29265	PPARG	5468
203164_at	0.242187	0.222143	3.22785	0.00496285	0.760304	-2.29889	SLC33A1	9197
205667_at	-0.299648	-0.190933	-3.22665	0.00497568	0.760804	-2.30134	WRN	7486
209488_s_at	0.322314	-0.0967619	3.22488	0.00499465	0.762425	-2.30494	RBPMS	11030
219634_at	-0.353547	0.203161	-3.22484	0.00499513	0.762425	-2.30503	CHST11	50515
216210_x_at	0.371991	0.232703	3.21925	0.00505547	0.768798	-2.31641	TRIOBP	11078
206157_at	0.854531	-0.00541282	3.21865	0.00506205	0.769027	-2.31764	PTX3	5806
1554539_a_at	-0.318175	0.219362	-3.21776	0.00507173	0.769212	-2.31945	RHOF	54509
201111_at	-0.253659	-0.286241	-3.2145	0.00510734	0.771782	-2.32607	CSE1L	1434
223330_s_at	-0.276081	-0.169011	-3.21338	0.00511969	0.773135	-2.32836	SUGT1	10910
217754_at	-0.234259	-0.171723	-3.21237	0.00513081	0.77338	-2.33041	DDX56	54606
203279_at	0.379908	0.202987	3.206	0.0052015	0.779279	-2.34336	EDEM1	9695
221596_s_at	-0.306653	-0.102747	-3.20513	0.00521128	0.779462	-2.34514	RBM48	84060
208579_x_at	0.308313	0.243364	3.20005	0.0052685	0.784923	-2.35548	HIST1H2BK, H2BFS,	85236, 102724334
226871_s_at	-0.383931	0.0906339	-3.1958	0.00531674	0.788853	-2.3641	ATG4D	84971
219880_at	-0.354375	0.217723	-3.19067	0.0053757	0.792177	-2.37454
1569181_x_at	-0.443553	-0.319785	-3.18989	0.00538466	0.792214	-2.37611
213573_at	0.363531	0.289648	3.18988	0.0053848	0.792214	-2.37614	KPNB1	3837
237324_s_at	0.481354	0.333426	3.18382	0.00545533	0.797092	-2.38845	HKDC1	80201
227054_at	-0.420937	-0.241228	-3.18282	0.00546702	0.797678	-2.39047	EEF1AKMT1	221143
223154_at	-0.315124	-0.259674	-3.1827	0.00546849	0.797678	-2.39073	MRPL1	65008
209018_s_at	0.278216	0.237452	3.18258	0.00546986	0.797678	-2.39096	PINK1	65018, 102464833
1554631_at	0.283894	0.0780712	3.18155	0.00548199	0.798679	-2.39306	ATM	472
227638_at	0.283232	-0.162298	3.17664	0.00554009	0.804447	-2.40303	EPG5	57724
222479_s_at	-0.320784	-0.195893	-3.17625	0.00554476	0.804447	-2.40383	DYNC1LI1	51143
1556211_a_at	-0.449769	-0.442912	-3.17619	0.00554545	0.804447	-2.40394
234980_at	-0.277203	0.0493874	-3.17237	0.00559114	0.806827	-2.4117	TMEM56	148534
227895_at	-0.270651	-0.0976903	-3.17137	0.00560312	0.807875	-2.41373	FAM120B	84498
230015_at	0.329575	0.295206	3.16301	0.00570452	0.817116	-2.43068	PRCD	768206
226439_s_at	-0.396517	0.0702993	-3.15756	0.00577161	0.821438	-2.44173	NBEA	26960
210691_s_at	-0.214284	-0.124841	-3.15297	0.00582872	0.827978	-2.45104	CACYBP, CACYBPP2	27101
229879_at	0.300763	0.309681	3.15192	0.00584181	0.828517	-2.45316	ASPH	444
204104_at	-0.237005	0.0927032	-3.14926	0.00587528	0.830451	-2.45855	SNAPC2	6618
31846_at	-0.200331	0.0876504	-3.14719	0.00590132	0.831391	-2.46273	RHOD	29984
212226_s_at	0.633408	0.377024	3.13875	0.00600906	0.838161	-2.47982	PLPP3	8613
234915_s_at	-0.23567	-0.228911	-3.13849	0.00601243	0.838254	-2.48035	DENR,	8562
238473_at	0.267653	0.141964	3.13805	0.00601812	0.838254	-2.48125	KMT2E-AS1
217933_s_at	-0.280984	-0.242675	-3.1377	0.0060227	0.838254	-2.48196	LAP3	51056
204080_at	-0.222102	-0.228319	-3.13726	0.00602838	0.838357	-2.48285	TOE1	114034
215489_x_at	0.295261	0.200091	3.13212	0.00609509	0.843734	-2.49325	HOMER3	9454
242900_at	-0.474962	-0.469419	-3.1312	0.00610709	0.843734	-2.4951	ALG10B	144245
221219_s_at	-0.344228	-0.302888	-3.12567	0.00617989	0.850048	-2.50629	KLHDC4	54758, 105371397
222118_at	-0.291432	-0.295836	-3.12495	0.00618942	0.850785	-2.50775	CENPN	55839
228211_at	-0.321463	-0.229089	-3.1246	0.00619408	0.851168	-2.50846	ERCC6L2	375748
219758_at	-0.313865	-0.16288	-3.12005	0.00625477	0.85563	-2.51766	TTC26	79989
211999_at	-0.19093	-0.130926	-3.11668	0.00630001	0.860145	-2.52446	H3F3B	3021, 100616282
1557541_at	-0.328051	-0.158838	-3.11639	0.00630392	0.860284	-2.52505	FAM201A
218839_at	0.659951	0.476695	3.11536	0.00631786	0.861412	-2.52713	HEY1	23462
207375_s_at	0.242932	0.186975	3.10618	0.00644316	0.872634	-2.54566	IL15RA	3601
229823_at	0.318423	-0.151221	3.10607	0.00644469	0.872634	-2.54589	RIMS2	9699
209343_at	0.330826	0.334481	3.10593	0.00644672	0.872634	-2.54618	EFHD1	80303
205401_at	-0.296776	-0.117083	-3.10338	0.006482	0.873562	-2.55133	AGPS	8540
226747_at	-0.206053	0.0766918	-3.10174	0.00650468	0.874304	-2.55463	TXNDC16	57544
224903_at	-0.193213	-0.111576	-3.10007	0.00652808	0.875895	-2.55801	UTP4	84916
209755_at	0.570041	0.164814	3.0985	0.00654992	0.876757	-2.56117	NMNAT2	23057
201036_s_at	-0.336084	-0.276194	-3.09455	0.00660557	0.880674	-2.56914	HADH	3033
211213_at	-0.244289	-0.0691682	-3.09185	0.00664387	0.883674	-2.5746	ORC5	5001
223354_x_at	-0.268033	-0.17408	-3.08679	0.00671603	0.887253	-2.58478	MFF	56947
1569154_a_at	0.227483	0.0958426	3.08504	0.00674124	0.889103	-2.58831
218738_s_at	-0.266761	-0.254314	-3.07967	0.0068191	0.895089	-2.59914	RNF138	51444
205559_s_at	0.373584	0.289422	3.07921	0.00682575	0.895236	-2.60006	PCSK5	5125
208216_at	0.38401	0.354204	3.07701	0.00685794	0.896873	-2.60449	DLX4	1748
218677_at	0.356521	0.378163	3.07573	0.00687685	0.898828	-2.60709	S100A14	57402
205757_at	-0.340093	-0.221882	-3.07541	0.00688152	0.89918	-2.60773	ENTPD5	957
228216_at	-0.311809	-0.180572	-3.07269	0.00692156	0.902725	-2.61319	ZBTB37	84614
225342_at	0.771298	-0.268576	3.07263	0.00692254	0.902725	-2.61333	AK4	205
230588_s_at	-0.244723	0.117535	-3.07225	0.00692817	0.902788	-2.61409
218239_s_at	-0.272146	-0.127017	-3.06984	0.00696381	0.905207	-2.61893	GTPBP4	23560
203038_at	0.201037	0.108919	3.06044	0.00710509	0.915766	-2.63785	PTPRK	5796
238681_at	-0.362793	0.225363	-3.05792	0.00714351	0.918816	-2.64293	GDPD1	284161
228259_s_at	-0.361255	-0.240933	-3.05549	0.00718066	0.922394	-2.64781	EPB41L4A-AS1
226758_at	-0.221269	-0.155212	-3.05455	0.00719497	0.922791	-2.64969
1554085_at	-0.407125	-0.281896	-3.05216	0.00723189	0.924952	-2.65451	DDX51	317781
233156_at	-0.389367	-0.347764	-3.04979	0.00726846	0.927102	-2.65925
227687_at	-0.266652	-0.17491	-3.04642	0.00732101	0.931719	-2.66604	HYLS1	219844
229097_at	-0.203311	-0.234138	-3.0432	0.00737142	0.935198	-2.6725	DIAPH3	81624
224852_at	-0.303495	0.169768	-3.04306	0.00737359	0.935198	-2.67277	TTC17	55761
223098_s_at	-0.285455	-0.202947	-3.04297	0.00737511	0.935198	-2.67297	LONP2	83752
218622_at	-0.227333	-0.16416	-3.04247	0.00738303	0.935407	-2.67398	NUP37	79023
204671_s_at	0.380695	-0.30378	3.04242	0.00738381	0.935407	-2.67408	ANKRD6	22881
218593_at	-0.188446	-0.0595099	-3.04114	0.00740389	0.936655	-2.67663	RBM28	55131
206931_at	-0.416056	-0.295283	-3.03809	0.00745231	0.938968	-2.68277	ZNF141	7700
1554894_a_at	-0.449042	-0.371956	-3.03557	0.00749247	0.941159	-2.68782	PCBD2	84105
213895_at	0.273244	0.194608	3.03341	0.00752702	0.943155	-2.69215	EMP1	2012
1559094_at	-0.31281	-0.0477265	-3.03067	0.00757119	0.946151	-2.69766	FBXO9	26268
221709_s_at	-0.279393	-0.241113	-3.03	0.00758198	0.946151	-2.699	ZNF839	55778
228601_at	0.332434	0.297747	3.02978	0.00758555	0.946168	-2.69944	HAGLR	401022
1555058_a_at	-0.265112	-0.176472	-3.02858	0.00760497	0.947328	-2.70185	LPGAT1	9926
240358_at	0.273484	0.206562	3.02559	0.00765362	0.950119	-2.70785
228577_x_at	-0.317842	-0.212641	-3.02451	0.00767124	0.951008	-2.71001	ODF2L	57489
207884_at	0.306901	0.230797	3.01925	0.00775778	0.955746	-2.72056	GUCY2D	3000
177_at	0.285227	0.111442	3.01741	0.00778827	0.958204	-2.72425	PLD1	5337
211932_at	0.281904	-0.132384	3.01594	0.00781255	0.959976	-2.72717	HNRNPA3	220988, 100616394
226631_at	-0.423823	-0.296831	-3.01192	0.00787982	0.964841	-2.73524	METTL10	399818
219000_s_at	-0.287011	-0.180795	-3.01189	0.0078804	0.964841	-2.7353	DSCC1	79075
214168_s_at	-0.292903	-0.200439	-3.01082	0.00789839	0.965405	-2.73745	TJP1	7082
1553679_s_at	-0.348085	-0.237286	-3.01035	0.00790626	0.965405	-2.73839	VKORC1L1	154807
211747_s_at	-0.230117	-0.0887531	-3.01001	0.0079119	0.965405	-2.73906	LSM5	23658
229829_at	0.265991	-0.163295	3.00771	0.00795086	0.966703	-2.74367	LINC00526
209275_s_at	0.257564	0.291962	3.00602	0.00797945	0.968885	-2.74705	, CLN3	1201
228536_at	-0.229056	-0.175394	-3.00475	0.00800116	0.970148	-2.7496	PRMT9	90826
205067_at	0.90443	0.437254	3.00464	0.00800303	0.970148	-2.74982	IL1B	3553
205642_at	-0.300995	-0.216121	-3.00269	0.00803625	0.973701	-2.75371	CNTRL	11064
200720_s_at	-0.256434	-0.124121	-3.00207	0.00804686	0.974467	-2.75495	ACTR1A	10121
223035_s_at	-0.254637	-0.165708	-3.00068	0.00807065	0.97579	-2.75773	FARSB	10056
232596_at	-0.275928	-0.346451	-2.99632	0.00814597	0.983589	-2.76646	DIAPH3	81624
225161_at	-0.29433	-0.202473	-2.9962	0.00814814	0.98359	-2.76671	GFM1	85476
209641_s_at	0.383801	0.460237	2.99279	0.00820738	0.987072	-2.77351	ABCC3	8714
224759_s_at	0.216399	0.182418	2.99242	0.00821388	0.987072	-2.77426	TMEM263	90488
219258_at	-0.352128	-0.341222	-2.9875	0.00830025	0.992209	-2.78408	TIPIN	54962
208107_s_at	-0.304593	-0.457793	-2.98422	0.00835843	0.995964	-2.79064		81691
223497_at	-0.288251	0.120569	-2.98394	0.00836345	0.996067	-2.79121	FAM135A	57579
235644_at	-0.360383	-0.190319	-2.98283	0.00838321	0.996365	-2.79342	CCDC138	165055
212788_x_at	0.22347	0.193565	2.97999	0.00843394	1	-2.79909	FTL, FTLP3	2512
1554287_at	-0.282541	-0.319926	-2.97471	0.00852926	1	-2.80964	TRIM4	89122
240831_at	0.308705	0.0548313	2.97465	0.00853028	1	-2.80975
1555910_at	-0.384919	-0.220165	-2.97446	0.00853374	1	-2.81013	PTCD2	79810
220035_at	-0.386614	-0.364909	-2.97395	0.00854305	1	-2.81115	NUP210	23225
211709_s_at	0.209494	0.152418	2.97154	0.00858694	1	-2.81596	CLEC11A	6320
201872_s_at	-0.266683	-0.119759	-2.96747	0.00866152	1	-2.82408	, ABCE1	6059
218678_at	0.249583	0.260897	2.96382	0.00872884	1	-2.83135	NES	10763
209188_x_at	-0.223007	-0.121114	-2.96353	0.00873429	1	-2.83193	DR1	1810
207039_at	0.227363	0.0961607	2.96085	0.0087841	1	-2.83727	CDKN2A	1029
217529_at	0.667315	0.537079	2.96011	0.00879791	1	-2.83874	ORAI2	80228
231973_s_at	-0.232013	0.107118	-2.95926	0.00881391	1	-2.84045	, ANAPC1	64682
210293_s_at	-0.231292	-0.0389673	-2.95775	0.00884216	1	-2.84345	SEC23B	10483
229514_at	-0.333199	-0.163883	-2.95703	0.00885569	1	-2.84488	GPATCH2L	55668
1556769_a_at	0.408337	0.46994	2.95417	0.00890959	1	-2.85058
213552_at	-0.281815	0.114922	-2.95144	0.00896141	1	-2.85602	GLCE	26035
225754_at	-0.250296	-0.147803	-2.95003	0.00898822	1	-2.85882	AP1G1	164
212807_s_at	-0.24132	0.0832901	-2.94962	0.00899613	1	-2.85964	SORT1	6272
242453_at	-0.386673	-0.359069	-2.94934	0.00900153	1	-2.8602
218258_at	0.267519	0.219924	2.94897	0.00900858	1	-2.86094	POLR1D	51082
200875_s_at	-0.228425	-0.253982	-2.9485	0.00901761	1	-2.86188	NOP56	10528, 100302138
223181_at	-0.310896	-0.1844	-2.9478	0.00903103	1	-2.86327	TIMM21	29090
229615_at	-0.231246	-0.201928	-2.94764	0.00903407	1	-2.86359	SLX4IP	128710
223590_at	-0.233312	-0.205334	-2.94576	0.00907004	1	-2.86731	ZNF700,	90592
207917_at	-0.246322	-0.172262	-2.94555	0.00907408	1	-2.86773
232193_at	-0.265057	-0.205848	-2.94511	0.00908273	1	-2.86862
228736_at	-0.484451	-0.217778	-2.94001	0.00918143	1	-2.87876	HELQ	113510
235394_at	-0.345569	-0.262199	-2.93948	0.00919186	1	-2.87982	PLAA	9373
206583_at	-0.256009	-0.212406	-2.93808	0.00921923	1	-2.88261	KRBOX4	55634
227004_at	-0.283009	0.105882	-2.93567	0.00926641	1	-2.88739	CDKL5	6792
203150_at	-0.243973	-0.182131	-2.93013	0.00937598	1	-2.89841	RABEPK	10244
202268_s_at	-0.232169	-0.108306	-2.92445	0.00948958	1	-2.90969	NAE1	8883
235029_at	-0.219581	-0.258366	-2.9228	0.00952268	1	-2.91295	GINS4	84296
217150_s_at	-0.212848	-0.375466	-2.92234	0.00953204	1	-2.91388
232889_at	-0.323441	-0.317033	-2.92062	0.0095669	1	-2.91729
209264_s_at	0.268711	-0.169218	2.91818	0.00961646	1	-2.92213	TSPAN4	7106
207087_x_at	0.229203	0.119339	2.91714	0.00963767	1	-2.9242	ANK1	286
232839_at	-0.511665	-0.479854	-2.91372	0.00970765	1	-2.93097	STK24-AS1
226232_at	-0.257106	0.0433404	-2.91047	0.00977476	1	-2.93742	GDF11	10220
226656_at	0.289497	0.189614	2.90863	0.009813	1	-2.94108	CRTAP	10491
211985_s_at	-0.404301	-0.4341	-2.90819	0.00982197	1	-2.94193	CALM1	801, 805
232650_at	-0.289987	-0.0748468	-2.9078	0.00983014	1	-2.94271	C12orf65	91574
230748_at	-0.431818	-0.581873	-2.90266	0.00993783	1	-2.95291	SLC16A6	9120
208914_at	0.254554	0.177943	2.90228	0.00994572	1	-2.95365	GGA2	23062
