# Supplementary material for: AKR1C1 as a Biomarker for Differentiating the Biological Effects of Combustible from Non-Combustible Tobacco Products
Source: Preprints.org preprint supplement (doi:10.20944/preprints201701.0111.v1), 2017-01-25
Supplement: Supplementary file 4 [file Sup_Table3_SigGenes_HGEC.xlsx]

## Sheet: TPM
AffyIDs	logFC	AveExpr	t	P.Value	adj.P.Val	B	Gene_Symbol	EntrezID
1562102_at	3.447	2.29653	19.4144	9.80351e-13	4.45911e-07	18.3513
226702_at	-2.58595	-1.38142	-18.3829	2.3101e-12	4.85055e-07	17.6776	CMPK2	129607
202437_s_at	5.65685	3.17904	17.7265	4.07899e-12	4.85055e-07	17.221	CYP1B1	1545
201467_s_at	2.19753	1.19491	17.6757	4.26564e-12	4.85055e-07	17.1847	NQO1	1728
204151_x_at	2.38335	1.51993	17.3686	5.60666e-12	5.10036e-07	16.9623	AKR1C1, AKR1C2	1645, 1646
210519_s_at	1.9888	1.06142	16.4634	1.28801e-11	8.43414e-07	16.2753	NQO1	1728
201468_s_at	2.37043	1.37364	16.4552	1.29799e-11	8.43414e-07	16.2689	NQO1	1728
AFFX-HUMISGF3A/M97935_MA_at	-1.78592	-0.805203	-15.8052	2.42033e-11	1.23616e-06	15.7446	STAT1	6772
202435_s_at	4.80266	2.39609	15.7944	2.44597e-11	1.23616e-06	15.7356	CYP1B1	1545
204972_at	-2.52628	-1.31724	-15.0009	5.40337e-11	2.45771e-06	15.0573	OAS2	4939
214059_at	-2.98601	-1.32105	-14.6326	7.90437e-11	3.12901e-06	14.7275	IFI44	10561
202436_s_at	4.94677	2.96377	14.5911	8.25508e-11	3.12901e-06	14.6897	CYP1B1	1545
201266_at	1.81279	1.04128	14.4528	9.54617e-11	3.34005e-06	14.5629	TXNRD1	7296
216594_x_at	2.371	1.60501	14.0863	1.41149e-10	4.58582e-06	14.2198	AKR1C1, AKR1C2	1645, 1646
203665_at	3.86732	1.42808	13.877	1.77172e-10	5.37243e-06	14.0192	HMOX1	3162
218542_at	-4.42785	-1.50546	-13.4244	2.92561e-10	8.31692e-06	13.5734	CEP55	55165
209921_at	2.93787	1.56538	13.2886	3.41007e-10	8.7581e-06	13.4364	SLC7A11	23657
217678_at	2.95956	1.57455	13.269	3.48677e-10	8.7581e-06	13.4164	SLC7A11	23657
209642_at	-4.14621	-1.41784	-13.2267	3.65845e-10	8.7581e-06	13.3734	BUB1	699
224399_at	-1.40286	-0.596715	-13.0902	4.27639e-10	9.5646e-06	13.2333	PDCD1LG2	80380
211653_x_at	2.28265	1.53109	13.0623	4.4159e-10	9.5646e-06	13.2044	AKR1C1, AKR1C2	1645, 1646
222608_s_at	-4.68977	-1.6027	-13.0067	4.70758e-10	9.73289e-06	13.1468	ANLN	54443
228617_at	-2.9005	-1.24754	-12.8305	5.77634e-10	1.14233e-05	12.9623	XAF1	54739
203764_at	-4.46147	-1.74898	-12.7926	6.03755e-10	1.14424e-05	12.9223	DLGAP5	9787
203153_at	-4.14049	-2.24248	-12.6091	7.49336e-10	1.33083e-05	12.7266	IFIT1	3434
205552_s_at	-2.39385	-0.92135	-12.5964	7.60729e-10	1.33083e-05	12.7129	OAS1	4938
228607_at	-1.76724	-0.709312	-12.3866	9.77154e-10	1.63152e-05	12.4852	OAS2	4939
207528_s_at	3.21078	1.46737	12.3637	1.00434e-09	1.63152e-05	12.4602	SLC7A11	23657
AFFX-HUMISGF3A/M97935_MB_at	-1.73175	-0.862108	-12.3125	1.06833e-09	1.67562e-05	12.4038	STAT1	6772
204822_at	-4.0363	-1.39749	-12.1938	1.23373e-09	1.87054e-05	12.2723	TTK	7272
229097_at	-2.48457	-1.0315	-11.9353	1.69453e-09	2.47685e-05	11.9813	DIAPH3	81624
218755_at	-3.88464	-1.49846	-11.9105	1.74733e-09	2.47685e-05	11.9531	KIF20A	10112
209699_x_at	2.00564	1.50736	11.886	1.80129e-09	2.47685e-05	11.9252	AKR1C1, AKR1C2	1645, 1646
204502_at	-1.62899	-0.696717	-11.8639	1.85145e-09	2.47685e-05	11.8999	SAMHD1	25939
201291_s_at	-4.77812	-1.54735	-11.8108	1.97815e-09	2.57073e-05	11.839	TOP2A	7153
209969_s_at	-1.81288	-0.796219	-11.7413	2.15799e-09	2.72656e-05	11.7588	STAT1	6772
219148_at	-4.13597	-1.49594	-11.7024	2.26611e-09	2.78577e-05	11.7137	PBK	55872
202869_at	-2.09196	-0.847363	-11.6361	2.46371e-09	2.94898e-05	11.6364	OAS1	4938
201292_at	-4.18343	-1.51996	-11.5692	2.68183e-09	3.12776e-05	11.558	TOP2A	7153
230314_at	-1.32591	-0.816707	-11.4624	3.07273e-09	3.49407e-05	11.432
219918_s_at	-4.29638	-1.59877	-11.4026	3.31732e-09	3.68019e-05	11.361	ASPM	259266
AFFX-HUMISGF3A/M97935_3_at	-1.47813	-0.725392	-11.2896	3.83782e-09	4.15625e-05	11.2256	STAT1	6772
202095_s_at	-3.38418	-1.34259	-11.2594	3.99085e-09	4.22147e-05	11.1893	BIRC5	332
205749_at	4.9868	2.62489	11.2157	4.22416e-09	4.36671e-05	11.1364	CYP1A1	1543
231577_s_at	-3.1153	-1.45828	-11.1228	4.76855e-09	4.81993e-05	11.0235	GBP1	2633
1552619_a_at	-4.27916	-1.51262	-11.0773	5.06182e-09	5.00514e-05	10.9678	ANLN	54443
200887_s_at	-1.46328	-0.68939	-11.057	5.19912e-09	5.03152e-05	10.9428	STAT1	6772
202269_x_at	-2.89413	-1.45863	-11.0341	5.35801e-09	5.07726e-05	10.9147	GBP1, GBP1P1	2633, 400759
207165_at	-4.1053	-1.31305	-10.9674	5.85172e-09	5.42583e-05	10.8324	HMMR	3161
235609_at	-2.37171	-0.930251	-10.953	5.96443e-09	5.42583e-05	10.8145	BRIP1	83990
214453_s_at	-2.45053	-1.53918	-10.7403	7.92349e-09	7.06664e-05	10.5485	IFI44	10561
AFFX-HUMISGF3A/M97935_5_at	-1.51988	-0.695932	-10.7032	8.32946e-09	7.28585e-05	10.5016	STAT1	6772
202086_at	-2.32909	-1.15783	-10.6718	8.69099e-09	7.45865e-05	10.4617	MX1	4599
204033_at	-2.88584	-0.968102	-10.6014	9.56e-09	8.0525e-05	10.3721	TRIP13	9319
227609_at	-2.23485	-1.29872	-10.5593	1.0124e-08	8.29666e-05	10.3182	EPSTI1	94240
203755_at	-3.66691	-1.21197	-10.5386	1.0415e-08	8.29666e-05	10.2915	BUB1B	701
209709_s_at	-3.55354	-1.17544	-10.5374	1.04311e-08	8.29666e-05	10.2901	HMMR	3161
218986_s_at	-2.37552	-1.46122	-10.5271	1.05795e-08	8.29666e-05	10.2768	DDX60	55601
205483_s_at	-2.25958	-1.07962	-10.5085	1.08515e-08	8.36574e-05	10.2529	ISG15	9636
203418_at	-3.36321	-1.26439	-10.46	1.15974e-08	8.79178e-05	10.1903	CCNA2	890
229450_at	-3.47843	-1.6798	-10.2543	1.54144e-08	0.000113193	9.92164	IFIT3	3437
228323_at	-3.36227	-1.12625	-10.2536	1.54293e-08	0.000113193	9.92073	CASC5	57082
204439_at	-3.59947	-1.82034	-10.2137	1.63141e-08	0.000117785	9.86798	IFI44L	10964
214710_s_at	-2.96094	-0.982788	-10.1949	1.67487e-08	0.000119033	9.8431	CCNB1	891
204962_s_at	-3.46533	-1.13403	-10.1393	1.81052e-08	0.000125821	9.76936	CENPA	1058
204059_s_at	0.900942	0.460561	10.1232	1.85208e-08	0.000125821	9.74786	ME1	4199
206133_at	-3.27977	-1.24033	-10.1211	1.8576e-08	0.000125821	9.74504	XAF1	54739
202270_at	-3.17244	-1.4977	-10.1122	1.88103e-08	0.000125821	9.73316	GBP1	2633
235570_at	-1.59023	-0.717487	-10.0865	1.95032e-08	0.000128566	9.69887	RBMS3	27303
226847_at	-2.65886	-0.644779	-9.97978	2.26858e-08	0.00014543	9.55545	FST	10468
222958_s_at	-3.7152	-1.30382	-9.97931	2.2701e-08	0.00014543	9.55482	DEPDC1	55635
204641_at	-4.02266	-1.38282	-9.96529	2.31584e-08	0.000146297	9.53587	NEK2	4751
204948_s_at	-2.1999	-0.599869	-9.95561	2.34796e-08	0.000146297	9.52279	FST	10468
207345_at	-2.64988	-0.566934	-9.89954	2.54359e-08	0.000156344	9.44674	FST	10468
204994_at	-2.14333	-1.12084	-9.86903	2.65721e-08	0.00016115	9.40518	MX2	4600
203213_at	-4.08945	-1.29757	-9.79773	2.94393e-08	0.00017619	9.30767	CDK1	983
201649_at	-1.04778	-0.469723	-9.76039	3.10693e-08	0.000182217	9.25634	UBE2L6	9246
228762_at	-1.37293	-0.421421	-9.75643	3.12476e-08	0.000182217	9.25089	LFNG	3955
211122_s_at	-3.17556	-1.62402	-9.74533	3.1753e-08	0.00018282	9.2356	CXCL11	6373
210559_s_at	-3.69838	-1.32512	-9.72009	3.29352e-08	0.000185508	9.20077	CDK1	983
210052_s_at	-2.53386	-0.825847	-9.71799	3.30355e-08	0.000185508	9.19787	TPX2	22974
228273_at	-2.31411	-0.771332	-9.70255	3.37839e-08	0.000186524	9.17651	PRR11	55771
218009_s_at	-3.03922	-0.848501	-9.68479	3.46667e-08	0.000186524	9.15191	PRC1	9055
213294_at	-1.06744	-0.523575	-9.68427	3.46929e-08	0.000186524	9.15119	EIF2AK2	5610
243041_s_at	-1.91508	-0.678917	-9.67924	3.49473e-08	0.000186524	9.14422
205623_at	2.20713	0.905299	9.67298	3.52669e-08	0.000186524	9.13554	ALDH3A1	218
219211_at	-1.55288	-0.610932	-9.64962	3.64867e-08	0.000188648	9.1031	, USP18	11274
218663_at	-3.65061	-1.09309	-9.64941	3.6498e-08	0.000188648	9.10281	NCAPG	64151
201890_at	-4.03751	-1.41878	-9.63269	3.73985e-08	0.000191131	9.07955	RRM2	6241
204709_s_at	-3.07178	-1.18011	-9.5688	4.10611e-08	0.000205347	8.99033	KIF23	9493
212203_x_at	-0.885589	-0.327551	-9.56844	4.1083e-08	0.000205347	8.98982	IFITM3	10410
207828_s_at	-3.22238	-1.19119	-9.56082	4.15449e-08	0.000205398	8.97914	CENPF	1063
219493_at	-3.70158	-1.3362	-9.539	4.28966e-08	0.0002098	8.94855	SHCBP1	79801
203925_at	1.33511	0.782511	9.49599	4.56996e-08	0.000220843	8.88804	GCLM	2730
204279_at	-1.55709	-0.628694	-9.4897	4.61255e-08	0.000220843	8.87917	PSMB9	5698
218943_s_at	-1.51818	-0.712172	-9.46864	4.75813e-08	0.00022544	8.84945	DDX58	23586
201616_s_at	-1.33375	-0.865631	-9.41414	5.15784e-08	0.000241037	8.77225	CALD1	800
226936_at	-2.00859	-1.03066	-9.40428	5.23379e-08	0.000241037	8.75826	CENPW	387103
218662_s_at	-3.74516	-1.14076	-9.40267	5.2463e-08	0.000241037	8.75597	NCAPG	64151
232596_at	-1.90639	-0.8926	-9.38716	5.36861e-08	0.00024419	8.7339	DIAPH3	81624
235964_x_at	-1.24126	-0.54102	-9.36602	5.54004e-08	0.000249493	8.70379	SAMHD1	25939
204162_at	-3.69331	-1.28706	-9.35704	5.61461e-08	0.000250372	8.69098	NDC80	10403
201118_at	1.25163	0.729309	9.33404	5.81043e-08	0.000256589	8.65813	PGD	5226
219352_at	-1.261	-0.863958	-9.31085	6.0152e-08	0.000263077	8.62493	HERC6	55008
206767_at	-1.29749	-0.623605	-9.28552	6.24747e-08	0.000270634	8.5886	RBMS3	27303
220295_x_at	-3.05854	-1.00889	-9.27249	6.37064e-08	0.000273366	8.56988	DEPDC1	55635
225834_at	-2.89915	-1.15416	-9.25728	6.51758e-08	0.000277057	8.548	FAM72C, FAM72A, FAM72B, FAM72D	554282, 728833, 729533, 653820
218355_at	-3.09762	-1.06089	-9.23819	6.70716e-08	0.000282476	8.52049	KIF4A	24137
236429_at	2.95408	1.01452	9.1878	7.23585e-08	0.000301946	8.44765
213226_at	-2.51621	-0.999177	-9.15219	7.63568e-08	0.000315734	8.39599	CCNA2	890
235529_x_at	-1.19006	-0.51228	-9.12559	7.94948e-08	0.000325748	8.35729	SAMHD1	25939
202954_at	-2.78622	-1.114	-9.07329	8.60656e-08	0.000349525	8.28093	UBE2C	11065
218726_at	-2.53765	-0.927531	-9.04597	8.97228e-08	0.000361153	8.2409	HJURP	55355
208079_s_at	-2.46912	-0.822835	-9.02255	9.2988e-08	0.000371013	8.2065	AURKA	6790
224823_at	-3.09924	-1.58721	-9.01034	9.47394e-08	0.000374714	8.18854	MYLK	4638
205046_at	-2.49281	-0.852349	-8.97488	1.00024e-07	0.000392206	8.13628	CENPE	1062
216565_x_at	-0.964733	-0.370041	-8.96331	1.01815e-07	0.000395817	8.11919
203214_x_at	-3.17005	-1.18375	-8.94909	1.04063e-07	0.000401127	8.09815	CDK1	983
205227_at	-1.20205	-0.508304	-8.93698	1.06018e-07	0.000404474	8.08023	IL1RAP	3556
223220_s_at	-1.68238	-0.759502	-8.93275	1.0671e-07	0.000404474	8.07395	PARP9	83666
202705_at	-2.87318	-1.11291	-8.92125	1.08614e-07	0.000408288	8.05691	CCNB2	9133
228729_at	-3.15487	-1.01201	-8.91378	1.0987e-07	0.000409626	8.04583	CCNB1	891
234986_at	1.37203	0.915364	8.84512	1.2216e-07	0.00044415	7.9436	GCLM	2730
204444_at	-2.95855	-0.826937	-8.84475	1.2223e-07	0.00044415	7.94304	KIF11	3832
201762_s_at	-0.827173	-0.428566	-8.84302	1.22557e-07	0.00044415	7.94046	PSME2P2, PSME2,	5721, 102465801
1554539_a_at	1.62617	0.800537	8.83748	1.23614e-07	0.00044415	7.93218	RHOF	54509
214022_s_at	-1.6469	-0.649911	-8.8354	1.24013e-07	0.00044415	7.92907	IFITM1, IFITM2	8519, 10581
204070_at	-1.26487	-0.544689	-8.82836	1.25374e-07	0.000445518	7.91854	RARRES3	5920
213906_at	-2.15385	-0.540502	-8.81463	1.28072e-07	0.000451577	7.89799	MYBL1	4603
204533_at	-3.1606	-1.74399	-8.80434	1.30134e-07	0.000455318	7.88258	CXCL10	3627
228892_at	-1.46778	-0.478203	-8.78883	1.3331e-07	0.000462868	7.85931	SH3RF2	153769
235588_at	-1.93601	-0.67786	-8.77806	1.35562e-07	0.000465895	7.84314	ESCO2	157570
223307_at	-2.41697	-0.921351	-8.76688	1.37943e-07	0.000465895	7.82633	CDCA3	83461
201601_x_at	-1.79694	-0.69815	-8.76242	1.38903e-07	0.000465895	7.81963	IFITM1	8519
234987_at	-1.48457	-0.690947	-8.76152	1.391e-07	0.000465895	7.81826	SAMHD1	25939
220049_s_at	-1.20173	-0.51397	-8.76058	1.39303e-07	0.000465895	7.81685	PDCD1LG2	80380
202870_s_at	-3.48444	-1.20217	-8.74243	1.43301e-07	0.000475768	7.78953	CDC20	991
226980_at	-2.22373	-0.58296	-8.7316	1.45745e-07	0.000477068	7.77319	DEPDC1B	55789
235337_at	-1.35446	-0.655579	-8.7314	1.4579e-07	0.000477068	7.77289	SERTAD4	56256
1555854_at	3.12401	2.28227	8.70089	1.52915e-07	0.000495948	7.72679	AKR1C1, AKR1C2	1645, 1646
201842_s_at	-0.923179	-0.501847	-8.69745	1.53741e-07	0.000495948	7.72159	EFEMP1	2202
242873_at	-1.76022	-0.731878	-8.67619	1.58948e-07	0.000509136	7.68939
204146_at	-2.70474	-1.07657	-8.66317	1.6223e-07	0.000516016	7.66963	RAD51AP1	10635
225687_at	-3.67777	-1.36738	-8.61186	1.75867e-07	0.000555505	7.59158	FAM83D	81610
236769_at	1.22728	0.681149	8.60544	1.77658e-07	0.000557292	7.58178
219306_at	-2.15186	-0.994059	-8.58267	1.84159e-07	0.000573729	7.547	KIF15	56992
201617_x_at	-1.27004	-0.933718	-8.57153	1.87428e-07	0.00057844	7.52997	CALD1	800
201288_at	-1.64548	-0.772865	-8.56888	1.88215e-07	0.00057844	7.52592	ARHGDIB	397
234863_x_at	-2.23766	-0.654555	-8.55771	1.91573e-07	0.000584809	7.5088	FBXO5	26271
238447_at	-1.52269	-0.827797	-8.54433	1.95675e-07	0.00059335	7.48829	RBMS3	27303
231033_at	1.74242	0.537786	8.53886	1.97379e-07	0.000594552	7.4799	DSC2	1824
222793_at	-1.61492	-0.697642	-8.52439	2.0196e-07	0.000604349	7.45768	DDX58	23586
202446_s_at	-1.01704	-0.60103	-8.47502	2.1845e-07	0.000649422	7.38165	PLSCR1	5359
211569_s_at	-1.82659	-0.760072	-8.43162	2.34113e-07	0.000691468	7.31453	HADH	3033
223381_at	-3.01631	-1.17533	-8.41744	2.39482e-07	0.000702761	7.29255	NUF2	83540
228069_at	-2.21374	-0.868109	-8.39925	2.46559e-07	0.000718891	7.2643	MTFR2	113115
202800_at	-1.74616	-0.554357	-8.38324	2.5297e-07	0.000732885	7.23941	SLC1A3	6507
212077_at	-0.954989	-0.585667	-8.35323	2.6546e-07	0.000764202	7.19265	CALD1	800
209891_at	-2.9092	-1.20253	-8.34214	2.70238e-07	0.000773065	7.17534	SPC25	57405
206482_at	1.08714	0.396029	8.32583	2.7743e-07	0.000788678	7.14985	PTK6	5753
223734_at	-1.35815	-0.443693	-8.29703	2.9062e-07	0.000821045	7.10475	MGARP	84709
202430_s_at	-1.01337	-0.57746	-8.25986	3.08629e-07	0.000866534	7.04636	PLSCR1	5359
218039_at	-2.78017	-0.731938	-8.25606	3.10532e-07	0.000866534	7.04039	NUSAP1	51203
225291_at	-1.26433	-0.496855	-8.20266	3.38654e-07	0.000939246	6.95615	PNPT1	87178
209773_s_at	-4.10231	-1.44263	-8.17926	3.51803e-07	0.0009682	6.91912	RRM2	6241
209159_s_at	2.17493	0.799101	8.17657	3.53351e-07	0.0009682	6.91485	NDRG4	65009
201036_s_at	-1.83067	-0.717485	-8.16866	3.57936e-07	0.000974131	6.90232	HADH	3033
204748_at	1.89904	0.956403	8.16522	3.59952e-07	0.000974131	6.89686	PTGS2	5743
211042_x_at	-1.83288	-0.691113	-8.16184	3.61941e-07	0.000974131	6.8915	SKP2	6502
232278_s_at	-3.40212	-1.23978	-8.15622	3.65275e-07	0.000977321	6.88258	DEPDC1,	55635
204092_s_at	-2.50454	-0.733584	-8.13658	3.77187e-07	0.00100329	6.85137	AURKA	6790
225439_at	-0.689664	-0.341657	-8.09667	4.02663e-07	0.0010634	6.78778	NUDCD1	84955
204211_x_at	-0.786635	-0.381812	-8.09395	4.04461e-07	0.0010634	6.78344	EIF2AK2	5610
1553764_a_at	-1.2198	-0.15022	-8.07864	4.14756e-07	0.00108188	6.75898	AJUBA	84962
1554696_s_at	-1.93631	-0.652328	-8.07645	4.16247e-07	0.00108188	6.75549	TYMS	7298
222039_at	-2.19955	-0.950891	-8.06533	4.23922e-07	0.00109557	6.73771	KIF18B	146909
204058_at	0.814425	0.384213	8.06083	4.27075e-07	0.00109748	6.73049	ME1	4199
1556332_at	1.24462	0.542432	8.04676	4.37075e-07	0.00111687	6.70796
201035_s_at	-1.36793	-0.633017	-8.03422	4.46198e-07	0.00113242	6.68784	HADH	3033
203362_s_at	-3.08644	-0.966407	-8.03159	4.48139e-07	0.00113242	6.68362	MAD2L1	4085
203798_s_at	-2.8083	-0.946414	-8.01652	4.59412e-07	0.00115449	6.65942	VSNL1	7447
1554538_at	1.06179	0.482573	8.00556	4.67806e-07	0.00116913	6.64178	RHOF	54509
209040_s_at	-1.1183	-0.376827	-7.97935	4.88519e-07	0.00121422	6.59958	PSMB8	5696
209714_s_at	-2.47331	-0.943745	-7.96794	4.97835e-07	0.00122598	6.58117	CDKN3	1033
206348_s_at	-0.783364	-0.317017	-7.96503	5.00245e-07	0.00122598	6.57646	PDK3	5165
217640_x_at	-2.20964	-0.805532	-7.96371	5.01335e-07	0.00122598	6.57434	SKA1	220134
216918_s_at	-1.75797	-0.398848	-7.93686	5.24168e-07	0.00127064	6.53094	DST	667
204728_s_at	-1.58658	-0.436674	-7.93569	5.25186e-07	0.00127064	6.52904	WDHD1	11169
222848_at	-2.22296	-0.696093	-7.89197	5.6481e-07	0.00135927	6.45813	CENPK	64105
206102_at	-2.36579	-0.786634	-7.84391	6.11989e-07	0.00146191	6.37987	GINS1	9837
202589_at	-1.88129	-0.564224	-7.84182	6.14129e-07	0.00146191	6.37646	TYMS	7298
1554768_a_at	-2.55682	-0.806599	-7.83894	6.171e-07	0.00146191	6.37175	MAD2L1,	4085
224701_at	-1.14495	-0.478557	-7.82081	6.36116e-07	0.00149915	6.34214	PARP14	54625
209417_s_at	-1.2786	-0.858322	-7.80231	6.56151e-07	0.0015384	6.31187	IFI35	3430
212022_s_at	-2.32735	-0.716438	-7.79597	6.63177e-07	0.0015469	6.30147	MKI67	4288
210567_s_at	-2.21057	-1.01194	-7.79066	6.69108e-07	0.00155277	6.29278	SKP2	6502
218875_s_at	-2.30889	-0.625493	-7.76936	6.93496e-07	0.0016012	6.25783	FBXO5	26271
241789_at	-1.34366	-0.592182	-7.74607	7.21236e-07	0.00165683	6.21953	RBMS3	27303
225806_at	-1.14368	-0.0786601	-7.73361	7.36543e-07	0.00168349	6.19902	AJUBA	84962
203180_at	1.77238	0.607405	7.72638	7.45585e-07	0.00169564	6.1871	ALDH1A3	220
218585_s_at	-2.8913	-0.744117	-7.68527	7.99238e-07	0.00180862	6.1192	DTL	51514
203626_s_at	-1.70369	-0.650509	-7.66002	8.34182e-07	0.00187835	6.07738	SKP2	6502
202831_at	1.45182	1.30977	7.65495	8.41384e-07	0.00188523	6.06898	GPX2	2877
202863_at	-1.64783	-0.546199	-7.63764	8.66495e-07	0.00193198	6.04023	SP100	6672
219045_at	2.10041	1.06003	7.63262	8.73907e-07	0.00193814	6.0319	RHOF	54509
219978_s_at	-2.59653	-0.731895	-7.63002	8.7778e-07	0.00193814	6.02758	NUSAP1	51203
201615_x_at	-1.03725	-0.77833	-7.61387	9.02244e-07	0.00198253	6.0007	CALD1	800
229414_at	1.14357	0.41838	7.60197	9.20715e-07	0.00201339	5.98088	PITPNC1	26207
224428_s_at	-2.5517	-0.682924	-7.59589	9.30309e-07	0.00202464	5.97074	CDCA7	83879
204069_at	-0.943578	-0.114231	-7.58269	9.51492e-07	0.00206088	5.94872	MEIS1	4211
221436_s_at	-1.99125	-0.825846	-7.564	9.82343e-07	0.00211762	5.9175	CDCA3	83461
204127_at	-2.53797	-0.875612	-7.52046	1.05836e-06	0.00227071	5.84457	RFC3	5983
211113_s_at	1.48138	0.992553	7.49901	1.09804e-06	0.0023448	5.80854	ABCG1	9619
227764_at	-0.865187	-0.251604	-7.49031	1.11458e-06	0.00236695	5.7939	LYPD6	130574
203625_x_at	-1.97844	-0.76284	-7.4881	1.11882e-06	0.00236695	5.79018	SKP2	6502
238015_at	-1.43177	-0.337435	-7.47831	1.13782e-06	0.002396	5.7737	C4orf46	201725
204455_at	-1.48583	-0.30245	-7.47136	1.15152e-06	0.00241367	5.76198	DST	667
212665_at	0.808731	0.493502	7.43952	1.21647e-06	0.00253492	5.70824	TIPARP	25976
201315_x_at	-0.850366	-0.353377	-7.43365	1.22885e-06	0.00253492	5.69832	IFITM2	10581
223540_at	1.3007	0.291784	7.43329	1.22962e-06	0.00253492	5.69771	NECTIN4	81607
204567_s_at	1.52341	1.03074	7.42832	1.24021e-06	0.00253492	5.68931	ABCG1	9619
1555950_a_at	1.10765	0.547884	7.42761	1.24174e-06	0.00253492	5.68811	CD55	1604
204747_at	-2.17468	-1.05045	-7.42711	1.2428e-06	0.00253492	5.68726	IFIT3	3437
213253_at	-1.23198	-0.516425	-7.41492	1.26927e-06	0.00257734	5.66662	SMC2	10592
205240_at	-0.917659	-0.209787	-7.39898	1.30474e-06	0.0026376	5.63961	GPSM2	29899
219644_at	-1.04849	-0.279455	-7.3597	1.3967e-06	0.002811	5.57287	CEP83	51134
242907_at	-1.01729	-0.379763	-7.33963	1.44624e-06	0.00289789	5.5387	GBP2	2634
203554_x_at	-1.32199	-0.292515	-7.33283	1.46347e-06	0.00291112	5.5271	PTTG1	9232
227807_at	-1.17959	-0.620428	-7.33197	1.46565e-06	0.00291112	5.52564	PARP9	83666
1554997_a_at	1.9696	0.966589	7.32773	1.4765e-06	0.00291993	5.51841	PTGS2	5743
236346_at	1.52238	0.742369	7.32018	1.49603e-06	0.00294575	5.50552
1553982_a_at	-1.85465	-0.774035	-7.31419	1.51172e-06	0.00295537	5.49529	RAB7B	338382
223437_at	0.602197	0.578918	7.31336	1.51391e-06	0.00295537	5.49387	PPARA	5465
219926_at	1.07032	0.638504	7.30891	1.52571e-06	0.00296567	5.48626	POPDC3	64208
1555758_a_at	-2.30831	-1.01057	-7.30109	1.54663e-06	0.00299355	5.4729	CDKN3	1033
202923_s_at	0.866192	0.582341	7.29319	1.56809e-06	0.00302223	5.45939	GCLC	2729
209408_at	-2.4494	-1.00921	-7.28783	1.58285e-06	0.0030378	5.4502	KIF2C	11004
202555_s_at	-2.32188	-1.49262	-7.27731	1.61219e-06	0.0030811	5.43219	MYLK	4638
213820_s_at	-1.05341	-0.54126	-7.27053	1.6314e-06	0.00308916	5.42057	STARD5	80765
202350_s_at	-1.44017	-0.41739	-7.26869	1.63668e-06	0.00308916	5.4174	MATN2	4147
205569_at	-2.03436	-0.83747	-7.26865	1.63678e-06	0.00308916	5.41734	LAMP3	27074
1559477_s_at	-0.649412	-0.171677	-7.25465	1.67735e-06	0.00314087	5.39332	MEIS1	4211
221258_s_at	-2.32612	-0.779747	-7.25444	1.67799e-06	0.00314087	5.39295	KIF18A	81930
204026_s_at	-2.25609	-0.943645	-7.24412	1.70857e-06	0.00318501	5.37523	ZWINT	11130
227928_at	-1.69845	-0.721555	-7.23921	1.72333e-06	0.0031994	5.36679	PARPBP	55010
218349_s_at	-1.41128	-0.706855	-7.2094	1.81585e-06	0.00334387	5.31547	ZWILCH	55055
1554003_at	-1.05564	-0.168673	-7.20186	1.84008e-06	0.00337482	5.30247	ARHGEF28	64283
228286_at	-1.29484	-0.560716	-7.18411	1.8984e-06	0.00346781	5.27184	GEN1	348654
204727_at	-1.63494	-0.452816	-7.17337	1.93465e-06	0.00350814	5.25327	WDHD1	11169
201387_s_at	0.914936	0.521247	7.173	1.93591e-06	0.00350814	5.25264	UCHL1	7345
204240_s_at	-1.39373	-0.520525	-7.12375	2.11165e-06	0.00381144	5.16731	SMC2	10592
230165_at	-1.8697	-0.718804	-7.11462	2.14605e-06	0.00385822	5.15145	SGO2	151246
226142_at	-1.60594	-0.723226	-7.09549	2.21999e-06	0.00397543	5.11818	GLIPR1	11010
218997_at	-0.753658	-0.243331	-7.07327	2.30918e-06	0.00411893	5.07948	POLR1E	64425
212658_at	1.11567	0.526708	7.06916	2.3261e-06	0.0041329	5.07231	LHFPL2	10184
203968_s_at	-1.88781	-0.516534	-7.06416	2.34684e-06	0.00414942	5.06359	CDC6	990
209464_at	-2.39978	-0.950121	-7.04078	2.44642e-06	0.00428063	5.02275	AURKB	9212
231880_at	1.91281	0.806638	7.03614	2.46672e-06	0.00428063	5.01463	STRIP2	57464
201926_s_at	1.09784	0.512056	7.03592	2.46765e-06	0.00428063	5.01426	CD55	1604
225807_at	-1.06804	-0.283571	-7.03471	2.47301e-06	0.00428063	5.01213	AJUBA	84962
210705_s_at	-1.13353	-0.431626	-7.03392	2.47646e-06	0.00428063	5.01076	TRIM5	85363
225415_at	-1.1332	-0.411791	-7.03123	2.48837e-06	0.00428063	5.00605	DTX3L	151636
219684_at	-1.58768	-0.725112	-7.02997	2.49395e-06	0.00428063	5.00385	RTP4	64108
202087_s_at	0.876095	0.424599	7.02445	2.51856e-06	0.00430663	4.99419	CTSL	1514
228152_s_at	-1.17249	-0.675258	-7.01343	2.56851e-06	0.00437559	4.97489	DDX60L	91351
203967_at	-1.9615	-0.665495	-7.01012	2.58372e-06	0.00438508	4.96909	CDC6	990
235088_at	-1.48372	-0.516817	-6.99218	2.66778e-06	0.0045041	4.93762	C4orf46	201725
235545_at	-2.4373	-0.950898	-6.99095	2.67365e-06	0.0045041	4.93546	DEPDC1	55635
217933_s_at	-0.883785	-0.616394	-6.94666	2.89407e-06	0.00483958	4.85756	LAP3	51056
210118_s_at	0.727972	0.409566	6.93372	2.96202e-06	0.00493201	4.83474	IL1A	3552
212949_at	-1.94011	-0.852199	-6.93203	2.97104e-06	0.00493201	4.83175	NCAPH	23397
231897_at	0.804117	0.674218	6.91777	3.04804e-06	0.00504145	4.80659	, PTGR1	22949
241418_at	1.8093	1.27607	6.91389	3.06938e-06	0.00505834	4.79973
1557286_at	1.16052	0.389795	6.88418	3.23782e-06	0.00531666	4.74717
204821_at	-1.42499	-0.367785	-6.87838	3.27182e-06	0.00535318	4.73689	BTN3A3	10384
228010_at	1.30403	0.530389	6.87578	3.28715e-06	0.00535898	4.73229	PPP2R2C	5522
206554_x_at	-1.61292	-0.689915	-6.87274	3.30522e-06	0.00536919	4.7269	SETMAR	6419
1555292_at	0.93677	0.452569	6.86047	3.37916e-06	0.00546976	4.70513	STRIP2	57464
201518_at	-0.664088	-0.21192	-6.8573	3.39855e-06	0.00548165	4.6995	CBX1	10951
204128_s_at	-1.87895	-0.669061	-6.82813	3.58233e-06	0.00574365	4.64768	RFC3	5983
48808_at	-1.82789	-0.727735	-6.82753	3.58624e-06	0.00574365	4.6466	DHFR	1719
242560_at	-1.7488	-0.656202	-6.81025	3.70015e-06	0.00587154	4.61582	FANCD2	2177
221520_s_at	-1.51853	-0.540184	-6.80986	3.70276e-06	0.00587154	4.61513	CDCA8	55143
200772_x_at	-0.969405	-0.236773	-6.80955	3.70482e-06	0.00587154	4.61458	, PTMA, PTMAP5, PTMAP2	5757, 728026, 100302285
223542_at	-1.44653	-0.521069	-6.80289	3.74977e-06	0.00590427	4.60271	SLF1	84250
206364_at	-1.98165	-0.719012	-6.80265	3.75144e-06	0.00590427	4.60227	KIF14	9928
205642_at	-1.41436	-0.50903	-6.79158	3.82743e-06	0.00599794	4.58253	CNTRL	11064
203797_at	-2.35999	-0.730342	-6.79016	3.83733e-06	0.00599794	4.57999	VSNL1	7447
1558846_at	2.31084	1.00012	6.77429	3.94943e-06	0.00615203	4.55164	PNLIPRP3	119548
204222_s_at	-1.52232	-0.798312	-6.76753	3.99818e-06	0.00620672	4.53956	GLIPR1	11010
211080_s_at	-2.2361	-0.776322	-6.76418	4.02257e-06	0.00620785	4.53357	NEK2	4751
212872_s_at	-0.749738	-0.385756	-6.76368	4.02621e-06	0.00620785	4.53268	MED20	9477
201014_s_at	-1.20091	-0.505834	-6.76066	4.04839e-06	0.0062099	4.52727	PAICS, PAICSP4	10606
219295_s_at	1.14768	0.526965	6.75978	4.05485e-06	0.0062099	4.52571	PCOLCE2	26577
208966_x_at	-1.04842	-0.264493	-6.75687	4.07641e-06	0.00622197	4.52048	IFI16	3428
203642_s_at	-0.952772	-0.273792	-6.74192	4.18871e-06	0.006372	4.49372	COBLL1	22837
205733_at	-1.88576	-0.708755	-6.72431	4.3252e-06	0.00655771	4.46214	BLM	641
203065_s_at	-1.38234	-0.649833	-6.71324	4.41337e-06	0.00666915	4.44227	CAV1	857
219885_at	-1.33277	-0.642444	-6.70462	4.48338e-06	0.00675251	4.42677	SLFN12	55106
219650_at	-1.58632	-0.529247	-6.69993	4.52188e-06	0.00678803	4.41834	ERCC6L	54821
225300_at	-1.09761	-0.459431	-6.69158	4.59135e-06	0.00686963	4.40333	KNSTRN	90417
204475_at	4.32382	1.81828	6.67311	4.74903e-06	0.00707417	4.37006	MMP1	4312
228281_at	-2.06311	-0.719798	-6.66699	4.8025e-06	0.00710519	4.35903	DDIAS	220042
211921_x_at	-0.942044	-0.268857	-6.666	4.81127e-06	0.00710519	4.35723	PTMA, PTMAP5, PTMAP2	5757, 728026, 100302285
222077_s_at	-1.35525	-0.349284	-6.64871	4.96597e-06	0.00728845	4.32605	RACGAP1	29127
227970_at	0.794808	0.35085	6.64856	4.96741e-06	0.00728845	4.32577	GPR157	80045
232914_s_at	-0.9213	-0.492876	-6.63979	5.04784e-06	0.00738265	4.30994	SYTL2	54843
208964_s_at	1.51147	1.05398	6.63006	5.13881e-06	0.0074916	4.29234	FADS1	3992, 100302263
209323_at	-0.826061	-0.384805	-6.61482	5.28464e-06	0.00767959	4.26476	THAP12	5612
226834_at	1.28702	1.5612	6.60682	5.36292e-06	0.00776853	4.25027	CLMP	79827
222812_s_at	1.54729	0.795331	6.60013	5.42931e-06	0.00783972	4.23814	RHOF	54509
202534_x_at	-1.74137	-0.84002	-6.5937	5.49384e-06	0.0079078	4.2265	DHFR	1719
236140_at	1.11595	0.738027	6.58781	5.5537e-06	0.00793713	4.21582	GCLM	2730
235425_at	-1.77882	-0.736304	-6.58548	5.57764e-06	0.00793713	4.21158	SGO2	151246
1555465_at	-0.940562	-0.193195	-6.58486	5.58402e-06	0.00793713	4.21045	MCOLN2	255231
222606_at	-1.19682	-0.604046	-6.57627	5.673e-06	0.00801353	4.19486	ZWILCH	55055
213007_at	-1.69267	-0.455178	-6.56939	5.74546e-06	0.00806858	4.18235	FANCI	55215
218768_at	-0.916098	-0.332082	-6.5692	5.74745e-06	0.00806858	4.18201	NUP107	57122
204318_s_at	-2.15727	-0.916878	-6.56152	5.82943e-06	0.00815848	4.16805	GTSE1	51512
235054_at	-0.898914	-0.346512	-6.54396	6.02142e-06	0.00838424	4.1361	NUDT16	131870
204510_at	-1.53375	-0.344773	-6.54175	6.04604e-06	0.00838424	4.13208	CDC7	8317
211762_s_at	-1.21415	-0.431223	-6.5391	6.07577e-06	0.00839986	4.12724	, KPNA2	146880, 3838
221703_at	-1.21849	-0.362411	-6.52489	6.2375e-06	0.00854553	4.10134	BRIP1	83990
219715_s_at	-0.911392	-0.191387	-6.50461	6.476e-06	0.00884564	4.06434	TDP1	55775
226661_at	-1.95745	-0.596941	-6.50024	6.52871e-06	0.00889034	4.05634	CDCA2	157313
205909_at	-1.82062	-0.757689	-6.49866	6.54782e-06	0.00889034	4.05346	POLE2	5427
227357_at	0.813206	0.476952	6.48355	6.73384e-06	0.0091157	4.02583	TAB3	257397
39402_at	0.66065	0.47092	6.46681	6.94636e-06	0.00937549	3.99519	IL1B	3553
204023_at	-1.29918	-0.272983	-6.46296	6.99625e-06	0.00941489	3.98813	RFC4	5984
222118_at	-1.15037	-0.270796	-6.45933	7.04366e-06	0.00945073	3.98147	CENPN	55839
213008_at	-1.52546	-0.474908	-6.4484	7.18821e-06	0.00956008	3.96143	FANCI	55215
201925_s_at	1.33485	0.765884	6.44296	7.26125e-06	0.00962905	3.95145	CD55	1604
225252_at	1.06484	0.808149	6.43956	7.30736e-06	0.00963656	3.94521	, SRXN1	140809
240353_s_at	-0.913826	-0.588362	-6.43942	7.30928e-06	0.00963656	3.94495	C12orf54	121273
200665_s_at	-1.50888	-0.330461	-6.43568	7.3604e-06	0.0096525	3.93808	SPARC	6678
209217_s_at	0.658251	0.258189	6.43388	7.38503e-06	0.0096525	3.93478	WDR45	11152
219000_s_at	-1.76461	-0.748648	-6.43091	7.42603e-06	0.00967827	3.92932	DSCC1	79075
1554408_a_at	-1.67055	-0.658405	-6.41106	7.70584e-06	0.00997316	3.89283	TK1	7083
204492_at	-1.28261	-0.462466	-6.40869	7.74e-06	0.00997316	3.88846	ARHGAP11A	9824
204970_s_at	1.17208	0.636121	6.40657	7.77068e-06	0.00998441	3.88456	MAFG	4097
238649_at	0.873312	0.520764	6.393	7.9701e-06	0.0101546	3.85956	PITPNC1	26207
202922_at	0.871209	0.507205	6.36222	8.44219e-06	0.0106233	3.80277	GCLC	2729
221521_s_at	-1.56865	-0.621641	-6.36142	8.45479e-06	0.0106233	3.8013	GINS2	51659
203856_at	-1.38603	-0.615322	-6.35144	8.61437e-06	0.0107609	3.78284	VRK1	7443
1559883_s_at	-1.76535	-0.637456	-6.35015	8.63522e-06	0.0107609	3.78046	SAMHD1	25939
206653_at	-1.04938	-0.495487	-6.34564	8.70836e-06	0.0108135	3.77213	POLR3G	10622
219863_at	-1.51428	-0.56453	-6.34441	8.72853e-06	0.0108135	3.76985	HERC5	51191
212023_s_at	-2.06852	-0.866891	-6.34318	8.74874e-06	0.0108135	3.76757	MKI67	4288
235276_at	-1.49017	-0.874593	-6.33236	8.92794e-06	0.0109627	3.74756	EPSTI1	94240
205339_at	-1.44168	-0.432331	-6.33176	8.93799e-06	0.0109627	3.74644	STIL	6491
229610_at	-2.3158	-0.801519	-6.32822	8.99754e-06	0.0110014	3.73989	CKAP2L	150468
1568812_at	0.858918	0.726719	6.32468	9.0575e-06	0.011045	3.73333		100507140
218330_s_at	-1.50754	-0.643255	-6.32177	9.10715e-06	0.0110759	3.72794	NAV2	89797
204237_at	1.29152	0.734821	6.31183	9.27868e-06	0.0112544	3.70952	GULP1	51454
204820_s_at	-1.39077	-0.180893	-6.31001	9.31055e-06	0.011263	3.70613	BTN3A3, BTN3A2	10384, 11118
213293_s_at	-1.80195	-0.9426	-6.2975	9.532e-06	0.0114396	3.68293	TRIM22	10346
221922_at	-0.915372	-0.143724	-6.26598	1.0115e-05	0.0121026	3.62432	GPSM2	29899
226961_at	1.19608	0.526651	6.26467	1.01398e-05	0.0121026	3.6219	PRR15	222171
241916_at	-0.830776	-0.426853	-6.25924	1.02442e-05	0.0121498	3.61179
202748_at	-1.4412	-0.804269	-6.25718	1.0284e-05	0.0121498	3.60796	GBP2	2634
203991_s_at	-0.986909	-0.412696	-6.24891	1.04458e-05	0.0123089	3.59255	KDM6A	7403
219209_at	-0.974866	-0.568912	-6.23686	1.06861e-05	0.0125549	3.57008	IFIH1	64135
219544_at	-1.13375	-0.303152	-6.23001	1.08254e-05	0.0126254	3.5573	BORA	79866
219855_at	-0.576266	-0.126665	-6.21856	1.10622e-05	0.0128685	3.53593	NUDT11	55190
229830_at	-0.908696	0.0876614	-6.19331	1.16038e-05	0.0134299	3.48873
200648_s_at	-0.823708	-0.447571	-6.18216	1.18517e-05	0.0136475	3.46784	GLUL	2752
240557_at	1.12556	0.446234	6.1808	1.18824e-05	0.0136482	3.46529	TSC22D2	9819
213599_at	-2.19122	-0.691943	-6.17838	1.1937e-05	0.0136764	3.46076	OIP5	11339
204886_at	-1.85592	-0.745752	-6.17497	1.20144e-05	0.0137305	3.45438	PLK4	10733
203209_at	-1.08825	-0.324579	-6.16514	1.22407e-05	0.0139192	3.43595	RFC5	5985
238469_at	-0.718887	-0.371211	-6.15581	1.24595e-05	0.0140975	3.41844	OGFRL1	79627
228824_s_at	0.746306	0.708492	6.14201	1.27908e-05	0.0143297	3.39253	, PTGR1	22949
205395_s_at	-1.19878	-0.322084	-6.1399	1.2842e-05	0.0143518	3.38858	MRE11A	4361
203595_s_at	-1.12646	-0.674017	-6.13837	1.28796e-05	0.0143585	3.38569	IFIT5	24138
213186_at	-1.03511	-0.668609	-6.13183	1.30407e-05	0.0144938	3.37341	DZIP3	9666
216574_s_at	-0.707775	-0.321386	-6.13017	1.3082e-05	0.0144938	3.37028	RPEL1, RPE	729020, 6120
216228_s_at	-1.28719	-0.589887	-6.12931	1.31035e-05	0.0144938	3.36866	WDHD1	11169
201476_s_at	-1.01418	-0.41678	-6.12611	1.31836e-05	0.0144938	3.36264	RRM1	6240
227875_at	-2.05823	-0.587288	-6.124	1.32366e-05	0.0145076	3.35868	KLHL13	90293
1553114_a_at	0.749025	0.114505	6.1192	1.33582e-05	0.0145707	3.34965	PTK6	5753
201614_s_at	-1.01655	-0.457806	-6.11492	1.34676e-05	0.0146032	3.34158	RUVBL1	8607
202094_at	-1.97506	-0.900007	-6.11427	1.34843e-05	0.0146032	3.34036	BIRC5	332
38241_at	-1.62839	-0.318711	-6.10252	1.37896e-05	0.0148279	3.31824	BTN3A3	10384
204887_s_at	-1.93346	-0.792048	-6.08749	1.41908e-05	0.0151692	3.28991	PLK4	10733
201843_s_at	-1.11049	-0.553509	-6.08663	1.42143e-05	0.0151692	3.28828	EFEMP1	2202
205543_at	-1.75831	-0.649187	-6.08505	1.4257e-05	0.0151692	3.28531	HSPA4L	22824
223919_at	-1.20283	-0.324234	-6.08444	1.42738e-05	0.0151692	3.28414	TP53AIP1	63970
236279_at	0.645438	0.187182	6.07775	1.44572e-05	0.015322	3.27153
204235_s_at	1.16006	0.713869	6.07553	1.45187e-05	0.015322	3.26734	GULP1	51454
212021_s_at	-2.0715	-0.747161	-6.06426	1.4835e-05	0.0155119	3.24604	MKI67	4288
210959_s_at	-0.646507	-0.301789	-6.05259	1.51699e-05	0.0157895	3.22398	SRD5A1	6715
221685_s_at	-1.08607	-0.492152	-6.0486	1.52861e-05	0.0158741	3.21644	SPDL1	54908
203964_at	-1.18134	-0.723663	-6.03994	1.55418e-05	0.0160446	3.20005	NMI	9111
230110_at	-0.671126	-0.202696	-6.00979	1.64668e-05	0.0168312	3.14291	MCOLN2	255231
242961_x_at	-1.08347	-0.494769	-6.00845	1.65091e-05	0.0168366	3.14038	DDX58	23586
226701_at	-2.03408	-1.43379	-6.00629	1.65776e-05	0.0168412	3.13629	GJA5	2702
209637_s_at	0.940456	0.35304	6.00253	1.6698e-05	0.0169155	3.12914	RGS12	6002
207469_s_at	1.30119	1.02941	5.99745	1.68616e-05	0.0170433	3.1195	PIR	8544
203022_at	-1.26912	-0.596933	-5.99026	1.70962e-05	0.0172039	3.10584	RNASEH2A	10535
229814_at	1.04411	0.502474	5.98688	1.72077e-05	0.0172042	3.09942	TNFAIP8	25816
202842_s_at	0.842963	0.374393	5.98681	1.72099e-05	0.0172042	3.09929	DNAJB9	4189
1569030_s_at	-0.492529	-0.244836	-5.98217	1.73641e-05	0.0172824	3.09047	NUB1	51667
217626_at	1.47378	1.02637	5.97381	1.76457e-05	0.0175243	3.07457	AKR1C1	1645
223035_s_at	-0.922426	-0.421134	-5.96743	1.78636e-05	0.0177021	3.06244	FARSB	10056
203641_s_at	-0.894746	-0.336349	-5.95742	1.82114e-05	0.0180075	3.04338	COBLL1	22837
220083_x_at	-0.902469	-0.40626	-5.95368	1.83431e-05	0.0180984	3.03626	UCHL5	51377
208897_s_at	-0.661687	-0.337231	-5.95134	1.84261e-05	0.0181408	3.0318	DDX18	8886
218883_s_at	-1.29282	-0.706537	-5.9353	1.9005e-05	0.0186301	3.00122	CENPU	79682
210416_s_at	-0.717273	-0.198176	-5.93225	1.91171e-05	0.0186997	2.9954	CHEK2	11200
235610_at	-0.894301	-0.168446	-5.92719	1.93047e-05	0.0187622	2.98575	ALKBH8	91801
244324_at	-0.757384	-0.272896	-5.90825	2.0024e-05	0.019234	2.94959	C18orf54	162681
226275_at	1.31852	0.750317	5.90774	2.00439e-05	0.019234	2.94861	MXD1	4084
204802_at	1.24253	0.829757	5.90358	2.02059e-05	0.019308	2.94065	RRAD	6236
226384_at	0.634731	0.3926	5.90203	2.02663e-05	0.0193251	2.9377	PLPP5	84513
212097_at	-1.08228	-0.554465	-5.89956	2.03636e-05	0.0193773	2.93296	CAV1	857
226978_at	0.613313	0.56236	5.89625	2.04945e-05	0.0194611	2.92663	PPARA	5465
1553984_s_at	-0.90079	-0.30197	-5.89092	2.07069e-05	0.0195904	2.91643	DTYMK	1841
233506_at	0.787286	0.0876844	5.88888	2.07889e-05	0.0195904	2.91253	BZW1	9689
208146_s_at	-1.22358	-0.478839	-5.86599	2.17314e-05	0.0202551	2.86869	CPVL	54504
228597_at	-1.05551	-0.437962	-5.84513	2.26288e-05	0.0210054	2.82868	MIS18A	54069
203712_at	-0.76368	-0.299926	-5.8395	2.28776e-05	0.02115	2.81787	PUM3	9933
225272_at	0.491825	0.29176	5.83529	2.30653e-05	0.021266	2.80978	SAT2	112483
206553_at	-0.945929	-0.621977	-5.8346	2.30964e-05	0.021266	2.80845
212789_at	-1.19556	-0.320409	-5.83117	2.32507e-05	0.0213648	2.80187	NCAPD3	23310
202600_s_at	1.06293	0.633027	5.82688	2.34455e-05	0.0214759	2.79362	NRIP1	8204
1553400_a_at	0.728248	0.454852	5.82197	2.36706e-05	0.0216144	2.78417	CRHR1-IT1	147081, 401884
219494_at	-1.31708	-0.31602	-5.81835	2.38375e-05	0.0216849	2.77722	, RAD54B	25788
205220_at	1.62459	0.597619	5.81684	2.39078e-05	0.0217054	2.77431	HCAR3, HCAR2	8843, 338442
218400_at	-1.5598	-0.690412	-5.814	2.40403e-05	0.0217823	2.76885	OAS3	4940
220885_s_at	-1.04974	-0.293621	-5.80691	2.43742e-05	0.0220409	2.75521	CENPJ	55835
201013_s_at	-1.077	-0.447571	-5.79024	2.51785e-05	0.0226371	2.7231	PAICS	10606
1552680_a_at	-2.06601	-0.869257	-5.79015	2.51829e-05	0.0226371	2.72293	CASC5	57082
1554885_a_at	-0.750657	-0.347034	-5.77518	2.59287e-05	0.0232158	2.69407	PRIM2	5558
205027_s_at	1.57263	0.572551	5.76469	2.64652e-05	0.0236033	2.67382	MAP3K8	1326
226333_at	1.55062	0.895796	5.734	2.81007e-05	0.0247705	2.61452	IL6R	3570
226863_at	2.28134	1.04567	5.72886	2.83846e-05	0.0249241	2.60457	FAM110C	642273
204083_s_at	-1.01343	-0.288625	-5.71825	2.89808e-05	0.0253366	2.58402	TPM2	7169
205067_at	0.587655	0.485336	5.71753	2.90215e-05	0.0253366	2.58263	IL1B	3553
207291_at	-0.956043	-0.197281	-5.71425	2.92083e-05	0.0254022	2.57628	PRRG4	79056
201110_s_at	-2.47365	-1.03713	-5.713	2.92799e-05	0.0254144	2.57386	THBS1	7057
219094_at	-0.695875	-0.253541	-5.7106	2.94182e-05	0.0254144	2.5692	ARMC8	25852
214361_s_at	0.754177	0.28537	5.708	2.95681e-05	0.0254716	2.56417	RGS12	6002
226242_at	-0.89181	-0.389839	-5.69889	3.01009e-05	0.0258327	2.54651	C1orf131	128061
209975_at	0.608933	0.237473	5.69729	3.01954e-05	0.025865	2.54341	CYP2E1	1571
237105_at	-0.613691	-0.275972	-5.67423	3.15934e-05	0.0267104	2.49865
236487_at	-0.947943	-0.559323	-5.66977	3.18712e-05	0.0268455	2.48999	SCLT1	132320
224320_s_at	-1.23525	-0.374165	-5.65846	3.25879e-05	0.0272474	2.46799	MCM8	84515
227566_at	-1.19105	-0.486749	-5.64305	3.35907e-05	0.0279318	2.43801	NTM	50863
205593_s_at	1.22181	0.434311	5.63251	3.42951e-05	0.0282192	2.41749	PDE9A	5152
201897_s_at	-1.25601	-0.438334	-5.63244	3.42995e-05	0.0282192	2.41736	, CKS1B, CKS1BP3	1163
205393_s_at	-1.04323	-0.535099	-5.63231	3.43086e-05	0.0282192	2.4171	CHEK1	1111
201695_s_at	0.646956	0.0720281	5.62848	3.4568e-05	0.0282791	2.40965	PNP	4860
214085_x_at	-1.27461	-0.565419	-5.62757	3.46302e-05	0.0282791	2.40787	GLIPR1	11010
202503_s_at	-2.1607	-0.968806	-5.62011	3.51431e-05	0.0285443	2.39333	KIAA0101	9768
213403_at	0.631072	0.725967	5.61322	3.56236e-05	0.0288601	2.37989	MFSD9	84804
204646_at	-0.93357	-0.361555	-5.61186	3.57191e-05	0.0288601	2.37725	DPYD	1806
223556_at	-1.53126	-0.507966	-5.61068	3.58028e-05	0.0288739	2.37493	HELLS	3070
227801_at	-0.980944	-0.62301	-5.60232	3.63979e-05	0.0290958	2.35863	TRIM59	286827
225081_s_at	-1.13849	-0.170275	-5.59959	3.65944e-05	0.0291486	2.3533	CDCA7L	55536
208955_at	-0.960718	-0.496827	-5.5994	3.66083e-05	0.0291486	2.35292	DUT	1854
1563445_x_at	0.736979	0.286563	5.59552	3.68897e-05	0.0292321	2.34535	CTSLP8
202188_at	-0.678501	-0.295409	-5.5912	3.72054e-05	0.029431	2.33692	NUP93	9688
1555996_s_at	-0.731358	-0.441835	-5.58379	3.77541e-05	0.0297615	2.32244	EIF4A2, SNORA4, SNORA63	1974, 100302143, 619568
225842_at	1.29327	0.995431	5.58244	3.78552e-05	0.0297895	2.31979	PHLDA1, NAP1L1	22822, 4673
242294_at	0.906373	0.573459	5.57984	3.80501e-05	0.0298397	2.31471	FBXO45	200933
203234_at	1.27545	0.530141	5.57551	3.83773e-05	0.0299929	2.30624	UPP1	7378
204221_x_at	-1.19318	-0.502329	-5.57284	3.858e-05	0.0300996	2.30103	GLIPR1	11010
223422_s_at	-0.868603	-0.318527	-5.56582	3.91193e-05	0.0304681	2.2873	ARHGAP24	83478
201109_s_at	-2.62312	-1.13616	-5.56051	3.95325e-05	0.0307372	2.27691	THBS1	7057
227420_at	-0.682175	-0.055624	-5.55871	3.96734e-05	0.0307942	2.27339	TNFAIP8L1	126282
201088_at	-0.883418	-0.376683	-5.55466	3.99929e-05	0.0309149	2.26545	, KPNA2	146880, 3838
226349_at	-0.541888	-0.327534	-5.55342	4.00908e-05	0.0309149	2.26303	C12orf45	121053
205763_s_at	-0.798388	-0.346813	-5.54459	4.07983e-05	0.0313463	2.24573	DDX18	8886
212914_at	0.716049	0.320437	5.53863	4.12825e-05	0.0315584	2.23406	CBX7	23492
212859_x_at	-0.75938	-0.156719	-5.53158	4.1864e-05	0.0319334	2.22022	MT1E	4493
212461_at	-0.454977	-0.299163	-5.52896	4.2082e-05	0.0319334	2.21509	AZIN1	51582
232238_at	-1.63573	-0.837255	-5.52446	4.24592e-05	0.0320223	2.20626	ASPM	259266
227350_at	-1.51075	-0.350178	-5.52353	4.25374e-05	0.0320223	2.20444	HELLS	3070
226603_at	-1.25327	-0.795233	-5.5224	4.26329e-05	0.0320223	2.20222	SAMD9L	219285
208963_x_at	1.31972	0.956298	5.52072	4.27751e-05	0.0320223	2.19893	FADS1	3992, 100302263
236641_at	-1.64816	-0.698539	-5.51954	4.28749e-05	0.0320223	2.19662	KIF14	9928
225414_at	0.55181	0.399076	5.51655	4.31305e-05	0.0321604	2.19074	RNF149	284996
222456_s_at	0.804154	0.244642	5.51421	4.33312e-05	0.0322224	2.18615	LIMA1	51474
225540_at	0.674378	0.332838	5.51233	4.34928e-05	0.0322224	2.18247	MAP2	4133
225904_at	-0.901204	-0.295994	-5.51171	4.35469e-05	0.0322224	2.18124	CCSAP	126731
231772_x_at	-1.31626	-0.497543	-5.51053	4.36489e-05	0.0322299	2.17892	CENPH	64946
215942_s_at	-1.34358	-0.465936	-5.50693	4.3962e-05	0.0323249	2.17185	GTSE1	51512
1554462_a_at	0.898453	0.362812	5.50331	4.42786e-05	0.0324317	2.16475	DNAJB9	4189
222713_s_at	-0.541452	-0.222722	-5.4831	4.60935e-05	0.0337067	2.12502	FANCF	2188
1565149_at	-0.598079	0.0466969	-5.47972	4.64042e-05	0.0338251	2.11837	DYNC2H1	79659
219502_at	-1.81774	-0.628939	-5.47378	4.69555e-05	0.0340632	2.10669	NEIL3	55247
238811_at	0.907994	0.235427	5.46979	4.73298e-05	0.0342801	2.09883	ATP11B	23200
211337_s_at	-0.707991	-0.0297489	-5.46671	4.76213e-05	0.0343724	2.09276	TUBGCP4	27229
230406_at	0.838622	0.431128	5.46605	4.7684e-05	0.0343724	2.09146	ASS1	445
218871_x_at	0.788735	0.481176	5.45773	4.84805e-05	0.0348361	2.07507	CSGALNACT2	55454
208511_at	-0.931523	-0.260834	-5.4555	4.86957e-05	0.0349356	2.07069	PTTG3P	26255
218995_s_at	-1.01082	-0.89302	-5.44792	4.94367e-05	0.0354113	2.05575	EDN1	1906
209449_at	-0.68819	-0.17591	-5.4461	4.96169e-05	0.0354845	2.05215	LSM2	57819
218308_at	-1.58728	-0.556579	-5.43342	5.08868e-05	0.0362786	2.02715	TACC3	10460
218710_at	-0.839712	-0.384369	-5.43069	5.11648e-05	0.0363942	2.02176	TTC27	55622
202487_s_at	-0.597561	-0.169062	-5.43026	5.12089e-05	0.0363942	2.02091	H2AFV,	94239
223125_s_at	-0.607674	-0.19518	-5.42271	5.19859e-05	0.036774	2.00601	C1orf21	81563
204422_s_at	1.74168	0.898247	5.41701	5.25814e-05	0.0370799	1.99475	FGF2	2247
205677_s_at	-1.19694	-0.0140179	-5.41015	5.33064e-05	0.0373595	1.9812	, DLEU1
207590_s_at	-1.19788	-0.510323	-5.40598	5.37527e-05	0.0375224	1.97295	CENPI	2491
1555812_a_at	-1.19225	-0.664435	-5.40428	5.3935e-05	0.0375224	1.9696	ARHGDIB	397
201463_s_at	0.461013	0.211205	5.40116	5.42724e-05	0.0376307	1.96343	TALDO1	6888
206677_at	-0.866576	-0.267446	-5.39445	5.50054e-05	0.038023	1.95016	KRT31	3881
218888_s_at	-1.17271	-0.0536812	-5.39357	5.51024e-05	0.0380323	1.94842	NETO2	81831
221802_s_at	-0.502568	-0.266538	-5.39013	5.54833e-05	0.0382371	1.94161	SHTN1	57698
212622_at	0.616663	0.354038	5.38901	5.56069e-05	0.0382412	1.9394	TMEM41B	440026
227517_s_at	-1.03951	-0.451093	-5.38637	5.59013e-05	0.0382931	1.93418	GAS5	60674
225310_at	-0.788271	-0.35388	-5.37576	5.71013e-05	0.0388228	1.91317	RBMX	27316
206550_s_at	-0.701531	-0.353159	-5.37488	5.72016e-05	0.0388329	1.91144	NUP155	9631
205073_at	-0.756064	-0.152898	-5.36621	5.82037e-05	0.0393371	1.89426	CYP2J2	1573
214729_at	-1.12846	-0.519841	-5.36172	5.87291e-05	0.0395745	1.88537	TWISTNB	221830
230193_at	-0.574728	-0.131425	-5.35949	5.89931e-05	0.039635	1.88093	WDR66	144406
205680_at	2.67363	0.45308	5.35341	5.97153e-05	0.0400611	1.86889	MMP10	4319
204435_at	0.747914	0.423109	5.35155	5.99393e-05	0.0401521	1.86519	NUP58	9818
228575_at	-0.921416	0.0650739	-5.35043	6.00734e-05	0.0401828	1.86298	IL20RB	53833
229674_at	-0.898429	-0.505978	-5.34751	6.04265e-05	0.0403596	1.85718	SERTAD4	56256
204803_s_at	1.28192	0.922252	5.344	6.08526e-05	0.0405252	1.85023	RRAD	6236
1555330_at	0.790899	0.327114	5.33314	6.21933e-05	0.041117	1.82868	GCLC	2729
202284_s_at	0.649162	0.247873	5.3305	6.25235e-05	0.0412754	1.82344	CDKN1A	1026
223700_at	-2.09014	-0.804227	-5.32825	6.28075e-05	0.041315	1.81895	MND1	84057
230482_at	-0.866679	-0.377852	-5.3269	6.29779e-05	0.041315	1.81627	ST6GALNAC5	81849
201144_s_at	-0.50732	-0.202239	-5.32402	6.33422e-05	0.0413158	1.81057	EIF2S1	1965
210038_at	-0.670578	-0.313603	-5.32332	6.34325e-05	0.0413158	1.80916	PRKCQ	5588
202747_s_at	-0.843755	-0.431562	-5.32284	6.3493e-05	0.0413158	1.80822	ITM2A	9452
205739_x_at	-1.07061	-0.409448	-5.32039	6.38061e-05	0.0414601	1.80335	ZNF107	51427
205459_s_at	0.428699	0.190159	5.31402	6.46277e-05	0.041839	1.7907	NPAS2	4862
1557100_s_at	0.596124	0.278845	5.31373	6.46651e-05	0.041839	1.79012	HECTD1	25831
201563_at	-0.638658	-0.343055	-5.29667	6.69223e-05	0.0428122	1.75619	SORD, SORD2P	6652
204835_at	-1.07628	-0.511643	-5.2952	6.71209e-05	0.0428587	1.75325	POLA1	5422
203145_at	-1.78225	-0.601214	-5.29473	6.71833e-05	0.0428587	1.75234	SPAG5	10615
224783_at	0.773299	0.502208	5.28829	6.80601e-05	0.0433572	1.73951	UBALD2	283991
218365_s_at	-0.563583	-0.453043	-5.2868	6.8264e-05	0.04341	1.73655	DARS2	55157
204521_at	-1.50432	-0.377114	-5.28065	6.91142e-05	0.0436396	1.72431	FAM216A	29902
244030_at	-0.608838	-0.422829	-5.28022	6.9175e-05	0.0436396	1.72344	STYX	6815
227295_at	-0.679733	-0.126721	-5.27393	7.00567e-05	0.0438148	1.71091	IKBIP	121457
218894_s_at	-0.669671	-0.501214	-5.25973	7.20905e-05	0.0443711	1.68261	MAGOHB	55110
222859_s_at	0.514669	0.190212	5.25849	7.22703e-05	0.0444216	1.68014	DAPP1	27071
242037_at	0.657588	0.515993	5.25435	7.28767e-05	0.0446736	1.67188	ASPH	444
205433_at	-1.02414	-0.439346	-5.24889	7.36832e-05	0.0450466	1.66099	BCHE	590
214938_x_at	-0.639264	-0.29734	-5.24322	7.45312e-05	0.0454429	1.64967	HMGB1, , HMGB1P5	3146
217202_s_at	-0.65273	-0.450188	-5.23934	7.51171e-05	0.0457327	1.64193	, GLULP4, SBF2, GLUL	81846, 2752
204679_at	1.1729	0.629308	5.23744	7.54059e-05	0.045792	1.63814	KCNK1	3775
1559822_s_at	0.483203	0.289513	5.22866	7.67544e-05	0.0464004	1.6206	MTDH	92140
213017_at	0.795919	0.598038	5.22766	7.6909e-05	0.0464004	1.61861	ABHD3	171586
1557218_s_at	-0.86131	-0.226364	-5.22629	7.71217e-05	0.0464004	1.61588	FANCB	2187
226622_at	0.889972	0.446797	5.22629	7.71217e-05	0.0464004	1.61588	LINC00969, MUC20	200958
217649_at	0.60441	0.318746	5.2188	7.82984e-05	0.0470461	1.60091
225541_at	-0.8492	-0.313816	-5.20723	8.01513e-05	0.0478434	1.57777	RPL22L1	200916
225943_at	-0.558484	-0.231814	-5.20411	8.06579e-05	0.0480403	1.57154	NLN	57486
204315_s_at	-1.70639	-0.674858	-5.19507	8.21478e-05	0.0485888	1.55344	GTSE1	51512
223154_at	-0.75628	-0.319435	-5.18909	8.31482e-05	0.0488656	1.54147	MRPL1	65008
203148_s_at	-1.09222	-0.482318	-5.18778	8.33677e-05	0.0488656	1.53886	TRIM14	9830
209846_s_at	-0.783835	-0.0627806	-5.16416	8.74552e-05	0.0505449	1.49153	BTN3A2	11118
201577_at	-0.657931	-0.346945	-5.1604	8.8124e-05	0.050611	1.48399	NME1-NME2, NME1	654364, 4830
204678_s_at	1.17971	0.675423	5.15914	8.83484e-05	0.050611	1.48148	KCNK1	3775
213112_s_at	1.40476	0.988059	5.15202	8.96347e-05	0.0512188	1.46718	SQSTM1	8878
1555841_at	0.683749	0.456311	5.15059	8.98947e-05	0.0512387	1.46432	MSANTD3	91283
205633_s_at	0.574314	0.219111	5.14849	9.02787e-05	0.0512648	1.4601	ALAS1	211
203882_at	-0.822531	-0.411204	-5.1338	9.30102e-05	0.0524293	1.43063	IRF9,	10379
238743_at	-0.882782	-0.353298	-5.13242	9.32717e-05	0.0525055	1.42785	EIF2AK2	5610
227931_at	0.453881	0.382127	5.12952	9.38227e-05	0.0527504	1.42203	INO80D	54891
217529_at	0.702936	0.368825	5.12512	9.46657e-05	0.0531142	1.41318	ORAI2	80228
201641_at	-1.09327	-0.589757	-5.11932	9.57884e-05	0.0533783	1.40152	BST2	684
222734_at	-0.558153	-0.35369	-5.11691	9.62581e-05	0.0534826	1.39669	WARS2	10352
228846_at	1.66732	1.074	5.11441	9.67494e-05	0.0536096	1.39165	MXD1	4084
202843_at	0.985098	0.390786	5.11007	9.76052e-05	0.0539436	1.38295	DNAJB9	4189
205394_at	-1.01265	-0.467684	-5.10456	9.87054e-05	0.0542222	1.37186	CHEK1	1111
201631_s_at	0.617036	0.430595	5.08144	0.000103462	0.0559316	1.32533	IER3	8870
1568592_at	-0.829802	-0.479173	-5.07996	0.000103774	0.0559316	1.32235	TRIM69	140691
203821_at	1.47125	1.11261	5.07991	0.000103785	0.0559316	1.32225	HBEGF	1839
221729_at	-1.71041	-0.652729	-5.06932	0.000106049	0.0568825	1.30091	COL5A2	1290
241360_at	-0.892385	-0.427371	-5.06391	0.000107224	0.0573151	1.29001	CCDC15	80071
203542_s_at	0.884671	0.510166	5.06387	0.000107234	0.0573151	1.28993	KLF9	687
221477_s_at	0.547588	-0.106286	5.05968	0.000108154	0.0577178	1.28148	SOD2	6648, 100129518
222774_s_at	-0.912118	0.128447	-5.05928	0.000108241	0.0577178	1.28068	NETO2	81831
203228_at	-0.51755	-0.126487	-5.03364	0.000114057	0.0596653	1.22894	PAFAH1B3	5050
214775_at	0.542006	0.217789	5.03331	0.000114134	0.0596653	1.22827	N4BP3	23138
1557985_s_at	-0.640259	-0.189539	-5.02656	0.000115718	0.0602224	1.21464	CEP78	84131
204840_s_at	-0.697501	-0.212765	-5.01929	0.000117448	0.0607095	1.19998	EEA1	8411
222853_at	-0.799863	-0.31002	-5.01871	0.000117589	0.0607095	1.19879	FLRT3	23767
204215_at	-0.524805	0.229136	-5.01643	0.000118137	0.0607856	1.1942	TMEM243	79161
206082_at	-1.17877	-0.657306	-5.01497	0.00011849	0.0608982	1.19125	HCP5	10866
219038_at	-0.556805	-0.221734	-5.01073	0.000119522	0.061221	1.18268	MORC4	79710
214661_s_at	-0.618333	-0.0315035	-5.00631	0.000120608	0.0615909	1.17373	NOP14	8602
226474_at	-0.798317	-0.404212	-5.00614	0.00012065	0.0615909	1.17339	NLRC5	84166
219555_s_at	-1.25402	-0.30457	-5.00537	0.000120841	0.061619	1.17183	CENPN	55839
215913_s_at	1.08337	0.613356	4.98725	0.000125405	0.0629584	1.13518	GULP1	51454
202274_at	-1.31564	-1.19012	-4.98207	0.000126742	0.0632802	1.1247	ACTG2	72
203596_s_at	-1.04181	-0.473619	-4.9814	0.000126916	0.0632979	1.12334	IFIT5	24138
201091_s_at	-0.479032	-0.142016	-4.96917	0.000130136	0.0643265	1.09858	CBX3	11335
222705_s_at	-0.704422	-0.415332	-4.96281	0.000131844	0.0648315	1.08569	SLC25A15	10166
210347_s_at	-0.582378	-0.150151	-4.96011	0.000132575	0.0651203	1.08023	BCL11A	53335
208643_s_at	-0.553176	-0.312452	-4.95447	0.000134117	0.0657324	1.0688	XRCC5	7520
1560727_at	-0.468834	-0.188728	-4.95397	0.000134254	0.0657324	1.06779	HEATR4	399671
1558906_a_at	-0.702777	0.12747	-4.94236	0.000137491	0.0666488	1.04424	OSER1-AS1	100505783
200783_s_at	-0.885894	-0.379737	-4.94158	0.000137712	0.0666488	1.04266	STMN1	3925, 100500808
228914_at	0.780812	0.61058	4.93794	0.000138744	0.0667806	1.03528
212667_at	-1.06572	-0.207278	-4.93506	0.000139566	0.0669633	1.02944	SPARC	6678
1560208_at	0.75104	0.08318	4.92813	0.000141567	0.0674963	1.01537
38037_at	1.60011	1.2147	4.92591	0.000142214	0.0676628	1.01087	HBEGF	1839
220651_s_at	-1.63884	-0.848398	-4.92154	0.000143496	0.0679883	1.002	MCM10	55388
223570_at	-1.045	-0.572573	-4.91669	0.000144934	0.0684558	0.992147	MCM10	55388
232001_at	-0.820265	-0.347134	-4.90286	0.000149112	0.0695623	0.964066	PRKCQ-AS1
202338_at	-1.1349	-0.547742	-4.89838	0.000150494	0.0699203	0.954948	TK1	7083
243524_at	0.558424	0.350438	4.89773	0.000150695	0.0699421	0.953632
211546_x_at	-0.655485	-0.208518	-4.88178	0.000155722	0.0714008	0.921207	SNCA	6622
204011_at	2.16858	0.988533	4.87718	0.000157205	0.0719361	0.911844	SPRY2	10253
219030_at	-0.57033	-0.296793	-4.86555	0.000161015	0.0730186	0.888182	TPRKB	51002
232116_at	1.02144	0.441072	4.85373	0.000164987	0.0743747	0.864111	GRHL3	57822
224945_at	0.509187	0.297743	4.8526	0.000165373	0.0744748	0.861805	BTBD7	55727
240419_at	-0.955545	-0.292915	-4.85111	0.000165879	0.0745551	0.858785	SLC6A15	55117
210334_x_at	-1.39229	-0.718214	-4.84121	0.000169304	0.0757203	0.838597	BIRC5	332
220122_at	1.81012	0.991974	4.83922	0.000169999	0.0758819	0.834551	MCTP1	79772
1554132_a_at	0.521345	0.243599	4.83398	0.000171847	0.0764817	0.82387	CCSER2	54462
210827_s_at	1.41682	0.716079	4.83106	0.000172886	0.0768689	0.817915	ELF3,	1999
225856_at	-0.523438	0.0449444	-4.82636	0.000174571	0.0775424	0.808333	CLOCK	9575
218014_at	-0.498869	-0.268608	-4.81799	0.000177614	0.0785107	0.791265	NUP85	79902
202242_at	1.3059	0.995392	4.80818	0.000181251	0.079731	0.771244	, TSPAN7	7102
211077_s_at	0.772286	0.405236	4.80437	0.000182685	0.0801291	0.763464	TLK1	9874
228037_at	0.690613	0.377646	4.80141	0.000183804	0.0804386	0.757433	RARA-AS1	101929693
227354_at	1.36649	0.696122	4.80108	0.000183932	0.0804386	0.756746	PAG1	55824
224918_x_at	0.618333	0.405545	4.79475	0.000186353	0.0810348	0.743829	MGST1	4257
202126_at	-0.522396	0.0295262	-4.7941	0.000186604	0.0810664	0.742501	PRPF4B	8899
224829_at	0.916643	0.507955	4.79348	0.000186844	0.0810934	0.741229	CPEB4	80315
237159_x_at	-0.707948	-0.451353	-4.78789	0.000189015	0.0816881	0.729823	AP1S3	130340
36711_at	1.12879	0.581162	4.78675	0.00018946	0.0817606	0.727499	MAFF	23764
1555058_a_at	0.575169	0.177397	4.78547	0.000189965	0.0818698	0.724874	LPGAT1	9926
237323_at	0.857758	0.43688	4.77935	0.000192386	0.0824753	0.712368	HKDC1	80201
235046_at	0.843269	0.0553855	4.77311	0.000194884	0.083149	0.699628	INPP4B	8821
223625_at	-0.545163	-0.259822	-4.77224	0.000195237	0.083149	0.697841	FAM126A	84668
229490_s_at	-1.23203	-0.586926	-4.7624	0.000199256	0.0843865	0.677722
218511_s_at	-0.746324	-0.365833	-4.76138	0.000199677	0.0844862	0.675636	PNPO	55163
1555278_a_at	-0.413382	-0.170654	-4.75466	0.000202474	0.0851154	0.661901	CKAP5	9793
201738_at	0.53171	0.331766	4.74286	0.000207488	0.0865038	0.637748	EIF1B	10289
225224_at	1.31445	0.551458	4.74233	0.000207716	0.0865194	0.636666	NOL4L	140688
203505_at	1.01353	0.595078	4.73047	0.000212884	0.0881875	0.612402	ABCA1	19
204818_at	2.10248	1.17988	4.72912	0.000213484	0.0883557	0.609623	HSD17B2	3294
218574_s_at	-0.871514	-0.441369	-4.7252	0.000215227	0.0889832	0.601598	LMCD1	29995
208962_s_at	1.56262	1.10586	4.72196	0.000216676	0.08919	0.59497	FADS1	3992, 100302263
221912_s_at	-0.825058	0.0683	-4.7214	0.00021693	0.0892137	0.593815	CCDC28B	79140
225295_at	-0.421345	-0.0879242	-4.71856	0.000218209	0.089588	0.588011	SLC39A10	57181
219998_at	-0.738793	-0.48941	-4.71679	0.000219017	0.0896256	0.584365	LGALSL	29094
242127_at	-0.972981	-0.173434	-4.7054	0.000224253	0.0913171	0.561043
223515_s_at	-0.775064	-0.453357	-4.70462	0.000224616	0.0913831	0.559445	COQ3	51805
213469_at	-0.661502	-0.00768974	-4.70285	0.000225445	0.0915567	0.555808	PGAP1	80055
1559067_a_at	0.864946	0.448159	4.69466	0.000229315	0.0924675	0.539012
238623_at	0.871765	0.329241	4.69219	0.000230492	0.0927777	0.533959
202696_at	0.426428	0.2703	4.69032	0.000231389	0.0929745	0.530122	OXSR1	9943
214639_s_at	-0.645767	0.0237896	-4.68423	0.000234337	0.0938165	0.517631	HOXA1	3198
226748_at	-0.645473	-0.00941106	-4.68386	0.000234516	0.0938165	0.516874	LYSMD2	256586
219661_at	-0.737555	-0.437162	-4.67911	0.000236846	0.0946506	0.507117	RANBP17	64901
219459_at	-0.765971	-0.388828	-4.65733	0.00024782	0.0973407	0.462423	POLR3B	55703
217755_at	-0.715425	-0.49249	-4.64841	0.000252467	0.0985598	0.444092	HN1	51155
206245_s_at	-0.969041	-0.556841	-4.64562	0.000253939	0.0987211	0.438356	IVNS1ABP	10625
204920_at	-0.735585	-0.366951	-4.63481	0.000259719	0.100538	0.41615	CPS1	1373
201323_at	-0.524834	-0.289587	-4.63172	0.000261394	0.100844	0.409808	EBNA1BP2	10969, 102465439
212736_at	0.595412	0.110122	4.62654	0.000264235	0.10151	0.399143	C16orf45	89927
210015_s_at	1.11259	0.550903	4.62405	0.00026561	0.101818	0.39402	MAP2	4133
209992_at	0.911129	0.431046	4.62013	0.000267785	0.102343	0.385975	PFKFB2	5208
201278_at	1.09993	0.698998	4.61999	0.000267862	0.102343	0.385691	DAB2	1601
224824_at	-0.594221	-0.525736	-4.61978	0.000267981	0.102343	0.385254	COX20P1, COX20	116228
201058_s_at	-0.826603	-0.649576	-4.61742	0.000269302	0.102675	0.380403	MYL9	10398
238075_at	-0.876088	-0.276643	-4.61286	0.000271878	0.103249	0.371013	CHEK1	1111
226929_at	0.866634	0.420947	4.61273	0.000271949	0.103249	0.370754	MTHFR	4524
201272_at	0.540419	0.493682	4.59448	0.000282503	0.106283	0.333197	AKR1B1	231
218797_s_at	0.480509	0.223772	4.58827	0.000286191	0.107492	0.320407	SIRT7	51547
241721_at	0.495454	0.463575	4.58434	0.000288544	0.108119	0.312331
239035_at	0.94036	0.451261	4.58315	0.000289265	0.108119	0.309868	MTHFR	4524
226555_at	0.493442	0.415313	4.58058	0.000290817	0.108348	0.30459	INO80D	54891
1552701_a_at	-0.718464	-0.684666	-4.58014	0.000291087	0.108348	0.303674	CARD16	114769
213019_at	-0.81546	-0.392367	-4.57944	0.000291511	0.108417	0.302239	RANBP6	26953
230036_at	-1.23963	-0.908295	-4.57612	0.000293541	0.108904	0.295395	SAMD9L	219285
205547_s_at	-1.99125	-1.12663	-4.57032	0.000297119	0.109762	0.283447	TAGLN	6876
209481_at	0.892842	0.609116	4.56964	0.000297542	0.109762	0.282044	SNRK	54861
228653_at	0.559783	0.702923	4.56794	0.000298597	0.109795	0.278555	SAMD5	389432
210788_s_at	0.402129	0.212995	4.56336	0.000301474	0.110406	0.269101	DHRS7	51635
203359_s_at	-0.672094	-0.416213	-4.55776	0.000305017	0.111256	0.257578	, MYCBP	26292
203545_at	-0.4962	-0.297603	-4.555	0.000306783	0.111355	0.251885	ALG8	79053
220907_at	0.698108	0.133929	4.54864	0.000310892	0.112408	0.238766	ADGRF1	266977
220949_s_at	-0.597647	-0.519797	-4.54689	0.000312032	0.112552	0.235159	C7orf49	78996
230194_at	-0.632549	-0.144639	-4.54607	0.000312564	0.112552	0.23348	LRPPRC	10128
243000_at	-0.612526	-0.305109	-4.54326	0.000314412	0.112748	0.227667	CDK6	1021
213393_at	0.676322	0.424064	4.54218	0.00031512	0.112748	0.225449	MFSD9	84804
239324_at	0.381054	0.207655	4.53154	0.000322215	0.11389	0.203496
206011_at	-0.675274	-0.280783	-4.5305	0.000322911	0.11389	0.20137	CASP1	834
216674_at	-0.780306	-0.563085	-4.52871	0.000324129	0.113921	0.197659	HES2	54626
241734_at	-0.551263	-0.26412	-4.52563	0.000326222	0.114316	0.191313	SRFBP1	153443
201280_s_at	1.11846	0.717724	4.52418	0.000327212	0.114484	0.188328	DAB2	1601
205167_s_at	-1.34313	-0.659103	-4.52327	0.000327834	0.114484	0.186454	CDC25C	995
1557701_s_at	-0.870814	-0.46355	-4.51588	0.000332947	0.115869	0.171199	POLH	5429
224856_at	-0.698725	-0.507443	-4.51166	0.000335902	0.116274	0.16249	FKBP5	2289
31637_s_at	0.516045	0.482676	4.51051	0.000336713	0.116378	0.160112	NR1D1	9572
223358_s_at	0.721063	0.526787	4.50157	0.000343077	0.117853	0.141658	PDE7A	5150
228879_at	-0.530004	-0.206909	-4.49505	0.000347797	0.119033	0.128191	SNORD104
223322_at	0.592617	0.262694	4.49354	0.000348901	0.119142	0.125068	RASSF5	83593
227027_at	0.729184	0.596719	4.49314	0.000349194	0.119153	0.124238	GFPT1	2673
225496_s_at	-0.846868	-0.581394	-4.48821	0.000352817	0.119849	0.114066	SYTL2	54843
1554411_at	-0.637175	-0.440551	-4.48718	0.000353582	0.12002	0.111933	CTNNB1	1499
202606_s_at	0.508288	0.405765	4.48059	0.000358499	0.121323	0.0983224	TLK1	9874
209900_s_at	-0.442175	-0.0998125	-4.4753	0.000362497	0.122225	0.0873952	SLC16A1	6566
1558501_at	-0.567253	-0.103943	-4.47398	0.000363503	0.122292	0.0846624	DNM3	26052
230416_at	0.697856	0.484415	4.46353	0.000371559	0.123812	0.0630654	PDZD8	118987
219454_at	-1.18013	-0.991661	-4.46036	0.000374036	0.124364	0.0565187	EGFL6	25975
231736_x_at	0.696018	0.428733	4.45625	0.000377278	0.124985	0.0480154	MGST1	4257
225240_s_at	-0.650855	-0.127723	-4.45521	0.000378101	0.125075	0.0458701	MSI2	124540
224580_at	0.627079	0.342103	4.45465	0.000378544	0.125131	0.0447159	SLC38A1	81539
221534_at	0.574025	0.459329	4.45287	0.000379963	0.125509	0.0410297	C11orf68	83638
230254_at	-0.855645	-0.499846	-4.44813	0.000383761	0.125979	0.0312304	FAM26E	254228
227531_at	-0.469411	0.0653002	-4.44709	0.000384601	0.125979	0.0290767	CLOCK	9575
206191_at	0.681146	0.707398	4.44627	0.000385264	0.125979	0.0273807	ENTPD3	956
217584_at	0.889697	0.567466	4.44494	0.000386342	0.12615	0.0246282	NPC1	4864
210020_x_at	-1.27127	-0.547873	-4.44334	0.000387644	0.126303	0.0213134	CALML3	810
238520_at	-1.22635	-0.070784	-4.44082	0.000389697	0.126707	0.0161101	TRERF1	55809
207178_s_at	-0.839988	-0.415121	-4.43371	0.000395563	0.128206	0.00139205	FRK	2444
37986_at	0.456863	0.283979	4.43032	0.000398392	0.128431	-0.00562671	EPOR	2057
211450_s_at	-0.656496	-0.0211504	-4.43021	0.000398479	0.128431	-0.00584078	MSH6	2956
235427_at	0.613153	0.417723	4.42972	0.000398889	0.128431	-0.00685425	CFLAR	8837
242218_at	0.903026	-0.169764	4.42389	0.000403808	0.129346	-0.0189278
210993_s_at	-0.588867	-0.274761	-4.42205	0.000405375	0.129642	-0.0227404	SMAD1	4086
202911_at	-0.585444	0.0330808	-4.41964	0.000407426	0.129956	-0.0277119	MSH6	2956
226209_at	-0.561589	-0.312704	-4.41748	0.000409281	0.130274	-0.0321868	NDUFV3	4731
235197_s_at	0.6312	0.406022	4.41305	0.000413108	0.131033	-0.0413526	OSTM1	28962
230847_at	0.505749	0.349928	4.41151	0.000414449	0.131367	-0.0445423
1555724_s_at	-1.77196	-1.11344	-4.40849	0.000417094	0.13165	-0.0508091	TAGLN	6876
210409_at	0.690038	-0.134457	4.40773	0.000417762	0.131683	-0.0523838	MLLT4-AS1	653483
213187_x_at	0.344971	0.227784	4.4024	0.000422471	0.1326	-0.0634224	, FTL, FTLP3	2512
203974_at	-0.42978	-0.187981	-4.40221	0.00042264	0.1326	-0.0638163	PUDP	8226
217999_s_at	0.835338	0.744124	4.39945	0.000425098	0.133165	-0.0695254	PHLDA1, NAP1L1	22822, 4673
205945_at	1.56089	0.87067	4.39795	0.00042644	0.133257	-0.0726301	IL6R	3570
214051_at	-0.700614	-0.443387	-4.39781	0.000426564	0.133257	-0.0729159	TMSB15B,	286527
235198_at	0.564246	0.302389	4.39393	0.000430063	0.133563	-0.0809595	OSTM1	28962
209853_s_at	-0.403907	-0.322979	-4.39318	0.000430743	0.133563	-0.0825159	PSME3	10197
226630_at	-0.892775	-0.29572	-4.39199	0.00043182	0.133705	-0.0849748	MIS18BP1	55320
228825_at	1.23946	1.15652	4.38884	0.000434691	0.134046	-0.0914986	PTGR1	22949
230002_at	-0.712554	0.0153643	-4.38848	0.000435017	0.134056	-0.0922369	GPSM2	29899
218073_s_at	-0.824658	-0.0482515	-4.38598	0.000437316	0.134219	-0.0974265	NDC1	55706
52940_at	0.802829	0.450079	4.38564	0.000437626	0.134224	-0.098125	SIGIRR	59307
223438_s_at	0.602204	0.517992	4.38487	0.000438334	0.13426	-0.0997172	PPARA	5465
208093_s_at	0.430038	0.291817	4.38123	0.000441708	0.13493	-0.107266	NDEL1	81565
202722_s_at	0.726634	0.464699	4.37888	0.0004439	0.135417	-0.112139	GFPT1	2673
232151_at	-1.34107	-0.875222	-4.37281	0.000449606	0.136426	-0.124713	MACC1	346389
1556429_a_at	-0.697564	-0.30271	-4.36694	0.000455193	0.137322	-0.136871	TBC1D31	93594
226886_at	0.78864	0.606925	4.3596	0.000462282	0.138517	-0.152083	GFPT1	2673
222802_at	-1.12303	-0.882773	-4.35861	0.000463249	0.138629	-0.154138	EDN1	1906
205467_at	-0.608391	-0.357512	-4.35822	0.000463636	0.138629	-0.15496	CASP10	843
1556538_at	0.412451	0.05151	4.35052	0.00047121	0.140259	-0.17091	MELTF	4241
237031_at	0.752191	0.422675	4.34962	0.000472105	0.140259	-0.172778
242073_at	-0.539328	-0.269922	-4.34837	0.000473351	0.140405	-0.175372
218973_at	0.780805	0.55466	4.34789	0.000473832	0.140405	-0.17637	EFL1	79631
225238_at	-0.563711	-0.00375451	-4.3416	0.000480154	0.141541	-0.189414	MSI2	124540
229164_s_at	0.459935	0.208303	4.33901	0.000482787	0.142115	-0.194796	ABTB1	80325
208921_s_at	-0.365769	-0.249298	-4.33876	0.000483041	0.142115	-0.195315	SRI	6717
235025_at	-0.703226	-0.368472	-4.33168	0.000490302	0.143601	-0.209996	WDR89	112840
235513_at	0.666199	0.692228	4.32997	0.000492069	0.143838	-0.213536
200987_x_at	-0.39814	-0.323714	-4.32968	0.000492375	0.143838	-0.214148	PSME3	10197
218736_s_at	-1.84915	-1.12796	-4.32639	0.000495803	0.144284	-0.220975	PALMD	54873
208892_s_at	0.654753	0.409346	4.32044	0.000502061	0.145444	-0.233317	DUSP6	1848
218651_s_at	0.726764	0.500377	4.32029	0.000502216	0.145444	-0.23362	LARP6	55323
239217_x_at	0.446349	0.305399	4.31674	0.000505987	0.145804	-0.240981	ABCC3	8714
221514_at	-0.57487	-0.255835	-4.31659	0.000506155	0.145804	-0.241308	UTP14A	10813
228665_at	-0.819948	-0.264955	-4.3156	0.000507213	0.145925	-0.243362	CYYR1	116159
227991_x_at	0.526178	0.39491	4.31559	0.00050722	0.145925	-0.243374	ZBTB43	23099
225752_at	0.589095	0.412345	4.31132	0.000511805	0.14678	-0.252228	NIPA1	123606
222752_s_at	0.474601	0.315786	4.31072	0.000512461	0.146783	-0.253489	TMEM206	55248
204180_s_at	0.683264	0.3914	4.30926	0.000514038	0.14705	-0.256512	ZBTB43	23099
1565162_s_at	0.736416	0.41866	4.30242	0.000521513	0.148071	-0.270713	MGST1	4257
210986_s_at	-0.931274	-0.673322	-4.3005	0.000523624	0.148292	-0.274687	TPM1	7168
201301_s_at	-0.50205	-0.368044	-4.30029	0.00052386	0.148292	-0.275131	ANXA4	307
217998_at	0.840561	0.687342	4.29805	0.000526343	0.148607	-0.279783	PHLDA1, NAP1L1	22822, 4673
204117_at	-0.515962	-0.292778	-4.28979	0.000535604	0.150283	-0.296939	PREP	5550
227070_at	-0.871118	-0.182066	-4.28951	0.000535913	0.150283	-0.297506	GLT8D2	83468
212382_at	-0.773781	-0.369612	-4.28191	0.000544591	0.151595	-0.313305	TCF4	6925
210039_s_at	-0.432645	-0.284886	-4.2698	0.0005587	0.153833	-0.338458	PRKCQ	5588
235924_at	-0.621558	-0.342221	-4.26949	0.000559055	0.153833	-0.339084	FRK	2444
232081_at	0.589589	1.01238	4.25841	0.000572305	0.156272	-0.362116
213489_at	-0.433756	-0.32551	-4.24885	0.000583981	0.158015	-0.381972	MAPRE2	10982
220134_x_at	0.393443	0.295488	4.24557	0.000588053	0.158833	-0.388804	EVA1B	55194
208084_at	-0.772012	-0.505332	-4.24505	0.000588696	0.158912	-0.389878	ITGB6	3694, 100505984
40446_at	0.618386	0.449783	4.24434	0.000589574	0.158961	-0.391343	PHF1	5252
228587_at	0.62107	0.31219	4.24109	0.000593649	0.159705	-0.398114	FAM83G	644815
216508_x_at	-0.67554	-0.42718	-4.24023	0.000594718	0.159779	-0.399883	HMGB1P4
225237_s_at	-0.658777	-0.0944968	-4.23834	0.00059711	0.160064	-0.403829	MSI2	124540
213029_at	-0.818206	0.0724984	-4.23578	0.000600344	0.160351	-0.409139	NFIB	4781
220979_s_at	-0.780215	-0.482197	-4.2308	0.000606705	0.161108	-0.419499	ST6GALNAC5	81849
208003_s_at	0.70615	0.540367	4.22914	0.000608834	0.161394	-0.422941	NFAT5	10725
227776_at	0.533626	0.35734	4.22201	0.000618085	0.163166	-0.437762	ACER3	55331
204963_at	0.540674	0.147106	4.2171	0.000624547	0.163995	-0.447984	SSPN	8082
208941_s_at	-0.425099	-0.242359	-4.2171	0.000624547	0.163995	-0.447984	SEPHS1	22929
209123_at	-0.735168	-0.484586	-4.21151	0.000631977	0.165014	-0.459606	QDPR	5860
223144_s_at	0.799601	0.427813	4.20887	0.000635517	0.165558	-0.465096	AKIRIN2	55122
204181_s_at	0.582167	0.349583	4.20491	0.000640866	0.16657	-0.473331	ZBTB43	23099
238669_at	-0.506938	0.210794	-4.20218	0.000644574	0.167225	-0.479001	PTGS1	5742
1553102_a_at	0.54589	0.123444	4.20073	0.000646565	0.167477	-0.482031	CCDC69	26112
231170_at	0.556706	0.222189	4.19483	0.00065468	0.168662	-0.494286	CDKL5	6792
229391_s_at	0.406912	0.348477	4.19418	0.000655592	0.168662	-0.495652	FAM26F	441168
202746_at	-0.624621	-0.266601	-4.19189	0.000658767	0.169288	-0.500399	ITM2A	9452
223427_s_at	-0.552777	-0.458121	-4.18662	0.000666172	0.170711	-0.51138	EPB41L4B	54566
207827_x_at	-0.456067	-0.1395	-4.18661	0.000666181	0.170711	-0.511394	SNCA	6622
223179_at	0.510704	0.482199	4.18396	0.000669932	0.171532	-0.51691	YPEL3	83719
227752_at	-1.24221	-0.755716	-4.17931	0.000676562	0.172496	-0.526583	SPTLC3	55304
217829_s_at	-0.337327	0.0128632	-4.17259	0.000686262	0.174091	-0.540566	USP39	10713
212036_s_at	-0.376821	-0.0242364	-4.16915	0.000691276	0.174973	-0.547716	PNN	5411
202599_s_at	0.702089	0.506622	4.16842	0.000692352	0.17505	-0.549244	NRIP1	8204
216860_s_at	-0.544536	-0.206764	-4.16414	0.000698652	0.176378	-0.55814	GDF11	10220
226364_at	-0.516318	0.0727379	-4.16263	0.000700894	0.176817	-0.561286	HIP1	3092
209929_s_at	0.458924	0.13001	4.16152	0.000702542	0.17695	-0.563593	IKBKGP1, IKBKG	8517
1555383_a_at	-0.850211	-0.620005	-4.16097	0.000703369	0.17695	-0.564749	POF1B	79983
244514_at	-0.527132	-0.186763	-4.15989	0.000704974	0.176981	-0.566987	IPO11	51194
228373_at	0.512092	0.399632	4.15623	0.000710467	0.177286	-0.574609	C16orf72	29035
212060_at	-0.399017	-0.255425	-4.15407	0.000713729	0.177495	-0.579108	U2SURP	23350
224177_s_at	-0.450339	-0.32146	-4.15359	0.000714448	0.177577	-0.580096	PBDC1	51260
227770_at	-0.425573	0.108172	-4.14967	0.000720414	0.178377	-0.588262	COG8
204825_at	-0.763465	-0.00966071	-4.14499	0.000727606	0.179207	-0.598015	MELK	9833
212055_at	-0.501986	-0.283143	-4.14301	0.000730656	0.179783	-0.602122	TPGS2	25941
233058_at	-0.684175	-0.0620301	-4.13377	0.000745119	0.181919	-0.621366	GPSM2	29899
202659_at	-0.541738	-0.330751	-4.13262	0.000746942	0.182021	-0.623765	, PSMB10	5699
232217_at	-1.10608	-0.731259	-4.13017	0.000750833	0.182467	-0.628865	FAM26E	254228
202021_x_at	0.514745	0.388103	4.1295	0.000751902	0.182534	-0.630263	EIF1	10209
232760_at	-0.433533	-0.102962	-4.12899	0.000752704	0.182595	-0.631308	TEX15	56154
217150_s_at	-0.753285	-0.530038	-4.12787	0.000754494	0.182835	-0.633641
201471_s_at	1.01413	0.690449	4.12706	0.000755795	0.182955	-0.635332	SQSTM1	8878
1555801_s_at	-0.872476	-0.628631	-4.1254	0.000758466	0.1833	-0.638794	ZNF385B	151126
212130_x_at	0.504462	0.376286	4.12502	0.00075908	0.1833	-0.639589	EIF1	10209
209172_s_at	-1.20121	-0.618423	-4.12492	0.000759237	0.1833	-0.639792	CENPF	1063
213164_at	0.406098	0.472541	4.12276	0.000762715	0.18375	-0.644278	SLC5A3	6526
227099_s_at	1.72015	1.02878	4.12021	0.000766852	0.184356	-0.649588	C11orf96	387763
213911_s_at	-0.470573	-0.00356291	-4.11924	0.000768433	0.184639	-0.65161	H2AFZ	3015
224481_s_at	0.423176	0.265159	4.11133	0.000781443	0.185414	-0.668086	HECTD1	25831
232172_at	0.593539	0.424796	4.10328	0.000794913	0.188021	-0.684858	CD99P1	401577
230296_at	1.02647	0.671372	4.10278	0.000795753	0.188024	-0.685895	C16orf52	730094, 102725138
211612_s_at	0.419962	-0.167801	4.09691	0.000805721	0.1892	-0.69811	IL13RA1	3597
230364_at	-0.528939	0.0146572	-4.09421	0.000810366	0.189899	-0.70375	CHPT1	56994
225099_at	0.36879	0.241301	4.08969	0.00081817	0.190941	-0.713154	FBXO45	200933
225062_at	-0.404846	-0.286222	-4.08758	0.000821849	0.191504	-0.717556		389831, 102723360, 102724219, 102724441, 102724843, 102724951
234700_s_at	1.77703	0.538831	4.08588	0.000824817	0.191901	-0.721093	RNASE7	84659
219582_at	-0.442537	-0.439573	-4.08284	0.000830155	0.192873	-0.727422	OGFRL1	79627
219250_s_at	-0.815063	-0.407526	-4.08257	0.000830642	0.192873	-0.727996	FLRT3	23767
205730_s_at	0.446268	0.0936023	4.07809	0.000838581	0.194111	-0.737328	ABLIM3	22885
206116_s_at	-1.02555	-0.742086	-4.07446	0.000845069	0.194987	-0.744888	TPM1	7168
221618_s_at	-0.739877	-0.582517	-4.07287	0.000847928	0.19528	-0.748202	TAF9B	51616
235714_at	-0.566196	-0.218495	-4.0707	0.000851834	0.195882	-0.752709	GANC	2595
244389_at	0.725579	0.404686	4.06824	0.000856298	0.196511	-0.757836	TLK1	9874
223294_at	-0.388456	-0.33058	-4.06276	0.000866337	0.198016	-0.769267	PBDC1	51260
201959_s_at	-0.437663	0.0168756	-4.06152	0.000868617	0.198438	-0.771845	MYCBP2	23077
228082_at	0.481535	0.760625	4.05893	0.000873403	0.199231	-0.777234	CLMP	79827
227940_at	-0.853471	-0.466525	-4.0575	0.000876068	0.199638	-0.780222		339803
51228_at	-0.464332	-0.134058	-4.05666	0.000877632	0.199795	-0.781971	RBM12B	389677
1553589_a_at	-1.0671	-0.511219	-4.05447	0.000881719	0.200224	-0.786527	PDZK1IP1	10158
230180_at	0.658563	-0.144403	4.05114	0.000887993	0.201046	-0.79348	DDX17	10521
210813_s_at	-0.636663	-0.414722	-4.02307	0.000942577	0.208169	-0.851963	XRCC4	7518
224093_at	-1.19666	-0.760102	-4.02296	0.000942793	0.208169	-0.852187	IFNK	56832
204556_s_at	-0.749987	-0.102469	-4.0183	0.000952182	0.20953	-0.8619	DZIP1	22873
223177_at	-0.369935	-0.22588	-4.01284	0.000963298	0.211465	-0.873275	NT5DC1	221294
208893_s_at	0.60503	0.418119	4.01191	0.000965224	0.211683	-0.875233	DUSP6	1848
228121_at	-1.29577	-0.77413	-4.00893	0.000971347	0.212616	-0.881429	TGFB2, TGFB2-OT1	7042, 103611157
220311_at	-0.65107	-0.308075	-4.0073	0.000974725	0.21315	-0.884832	N6AMT1	29104
226807_at	-0.528695	0.0185552	-4.00129	0.000987268	0.215107	-0.897361	ZFP1	162239
218852_at	0.435755	0.106412	3.99877	0.000992571	0.215704	-0.90261	PPP2R3C	55012
200853_at	-0.460793	0.0405762	-3.9886	0.00101428	0.218233	-0.923808	H2AFZ	3015
222754_at	-0.467759	-0.2879	-3.98055	0.0010318	0.22023	-0.940579	TRNT1	51095
219737_s_at	0.477604	-0.12327	3.97482	0.00104447	0.22179	-0.952537	PCDH9	5101
228728_at	-0.666266	-0.381787	-3.97084	0.00105336	0.222949	-0.960835	CPED1	79974
205252_at	-0.462174	-0.0241547	-3.96833	0.00105899	0.223934	-0.966063	ZNF174	7727
204467_s_at	-0.931995	-0.218583	-3.96784	0.00106009	0.223963	-0.96708	SNCA	6622
229812_at	-0.550495	-0.0271198	-3.96386	0.00106911	0.224922	-0.975371	USP48	84196
201061_s_at	-0.465839	0.093192	-3.9622	0.00107291	0.22541	-0.978848	STOM	2040
235086_at	-1.84396	-0.896021	-3.96037	0.0010771	0.225872	-0.982661	THBS1	7057
202082_s_at	0.592645	0.39318	3.95519	0.00108902	0.227471	-0.993444	SEC14L1	6397
204464_s_at	0.880389	0.517272	3.95398	0.00109185	0.227809	-0.995979	EDNRA	1909
229393_at	-0.729907	0.0414615	-3.94854	0.00110455	0.229828	-1.00731	L3MBTL3	84456
239431_at	0.465669	0.245265	3.94415	0.00111494	0.231231	-1.01647	TMED7-TICAM2, TICAM2	100302736, 353376
233874_at	-0.444071	0.108797	-3.94308	0.00111747	0.231458	-1.01869
225710_at	-0.437416	-0.628511	-3.93918	0.00112679	0.231699	-1.02682	GNB4	59345
225612_s_at	0.401232	0.256209	3.93681	0.00113249	0.232661	-1.03176	B3GNT5	84002
229838_at	0.642494	0.384247	3.93519	0.00113642	0.233153	-1.03515	NUCB2	4925, 105376575
239331_at	0.853754	0.603579	3.93328	0.00114104	0.233995	-1.03912
212227_x_at	0.489856	0.367211	3.92983	0.00114946	0.234768	-1.04631	EIF1	10209
209713_s_at	-0.480095	-0.47576	-3.9259	0.00115912	0.236199	-1.05451	SLC35D1	23169
218196_at	0.428686	0.321102	3.91929	0.00117556	0.237773	-1.06829	OSTM1	28962
235315_at	-0.670995	-0.330257	-3.91894	0.00117644	0.237773	-1.06902	TSC22D1	8848
219443_at	-0.507673	-0.235521	-3.91811	0.00117852	0.238033	-1.07075	TASP1	55617
244804_at	0.958816	0.640634	3.91672	0.00118202	0.238633	-1.07365	SQSTM1	8878
233852_at	-0.640149	-0.435652	-3.91299	0.00119145	0.240018	-1.08143
36936_at	-0.369288	-0.340456	-3.9127	0.00119219	0.240046	-1.08203	TSTA3	7264
212206_s_at	-0.722132	-0.0693031	-3.91001	0.00119903	0.24056	-1.08763	H2AFV	94239
203355_s_at	-0.62972	0.0503602	-3.90961	0.00120005	0.24056	-1.08846	PSD3	23362
202906_s_at	-0.374764	-0.285345	-3.90313	0.00121675	0.242522	-1.10198	NBN	4683
200664_s_at	0.67488	0.254019	3.90278	0.00121764	0.242594	-1.1027	DNAJB1	3337
212400_at	0.639857	0.46146	3.89906	0.00122733	0.243499	-1.11046	FAM102A	399665
1555733_s_at	-0.480017	-0.442527	-3.89898	0.00122754	0.243499	-1.11062	AP1S3	130340
1552370_at	-0.698348	-0.654325	-3.89376	0.00124129	0.245064	-1.12152	C4orf33	132321
205251_at	-0.796204	-0.570922	-3.89308	0.00124307	0.245089	-1.12292	PER2	8864
226126_at	-0.66851	-0.44895	-3.89196	0.00124605	0.245112	-1.12526	TBCK	93627
209197_at	0.523406	0.356537	3.89083	0.00124904	0.245403	-1.1276	SYT11	23208
210785_s_at	0.974479	0.29506	3.89078	0.00124917	0.245403	-1.12771	THEMIS2	9473
235830_at	-0.515186	-0.321733	-3.88896	0.00125404	0.245449	-1.13151	NT5DC1	221294
227184_at	0.71493	0.475623	3.88661	0.00126032	0.246556	-1.1364	PTAFR	5724
201952_at	-0.397432	0.039008	-3.88505	0.00126454	0.246962	-1.13967	ALCAM	214
228042_at	0.439907	0.0316448	3.88261	0.00127112	0.248141	-1.14475	ADPRH	141
208832_at	-0.450571	-0.397976	-3.87787	0.00128402	0.25014	-1.15462	ATXN10	25814
214519_s_at	-0.56667	-0.442713	-3.87784	0.00128411	0.25014	-1.15469	RLN2	6019
237262_at	0.482029	0.278527	3.87594	0.00128933	0.250835	-1.15866	GAREM1	64762
200924_s_at	0.860477	0.727656	3.87448	0.00129335	0.251463	-1.1617	SLC3A2	6520
222623_s_at	-0.525033	0.0498844	-3.87236	0.00129919	0.252003	-1.1661	ZNF639	51193
229872_s_at	-0.59153	0.274745	-3.87168	0.0013011	0.25226	-1.16754		100996720
210163_at	-1.19096	-0.650415	-3.87081	0.00130349	0.252352	-1.16933
220206_at	-0.490836	-0.281226	-3.86959	0.0013069	0.252523	-1.17188	ZMYM1	79830
219638_at	-0.700815	-0.536846	-3.86896	0.00130866	0.252756	-1.1732	FBXO22	26263
203409_at	-0.521186	0.117237	-3.86764	0.00131233	0.252856	-1.17594	DDB2	1643
210976_s_at	-0.682615	0.00139017	-3.86622	0.00131631	0.252856	-1.1789	PFKM	5213
226269_at	-0.792777	-0.516953	-3.86585	0.00131736	0.252856	-1.17968	GDAP1	54332
221788_at	0.558566	0.395148	3.86385	0.00132298	0.253551	-1.18385	PGM3	5238
234699_at	1.68	0.454193	3.85767	0.00134054	0.255839	-1.19673	RNASE7	84659
224984_at	0.459786	0.48405	3.85067	0.0013607	0.258419	-1.21132	, NFAT5	10725
202907_s_at	-0.61179	-0.367379	-3.84832	0.00136754	0.258955	-1.21622	NBN	4683
226858_at	0.792974	0.534977	3.84826	0.0013677	0.258955	-1.21634	CSNK1E	1454, 102800317
226267_at	-0.552593	0.0910263	-3.84813	0.00136808	0.258955	-1.21661	JDP2	122953
225978_at	-1.03268	-0.600737	-3.84749	0.00136994	0.259092	-1.21794	RIMKLB	57494
204735_at	0.48338	0.314384	3.84683	0.00137187	0.259349	-1.21931	PDE4A	5141
1555118_at	0.739232	0.47157	3.84332	0.0013822	0.260616	-1.22664	ENTPD3	956
201611_s_at	-0.361452	0.0298559	-3.84016	0.00139154	0.26133	-1.23323	ICMT	23463
221556_at	-0.439387	0.136516	-3.83935	0.00139393	0.261671	-1.2349	CDC14B	8555
230556_at	-0.622371	-0.366424	-3.83745	0.00139958	0.262515	-1.23886	IMMP1L	196294
226541_at	0.465119	0.425864	3.83725	0.0014002	0.262521	-1.23929	FBXO30	84085
235643_at	-0.996154	-0.656159	-3.83685	0.00140138	0.262527	-1.24011	SAMD9L	219285
200666_s_at	0.647055	0.303946	3.83651	0.00140241	0.262612	-1.24083	DNAJB1	3337
209520_s_at	-0.414284	-0.288611	-3.83102	0.00141892	0.264072	-1.25226	NCBP1	4686
213032_at	-0.796347	0.0932427	-3.827	0.00143114	0.264865	-1.26064	NFIB	4781
204730_at	0.581225	-0.1743	3.82648	0.00143274	0.265018	-1.26173	RIMS3	9783
218581_at	0.462391	0.318864	3.8246	0.00143847	0.265862	-1.26563	ABHD4	63874
206522_at	-0.969273	-0.38424	-3.82276	0.00144415	0.266291	-1.26949	MGAM	8972
226319_s_at	-0.393327	-0.242267	-3.81922	0.0014551	0.267306	-1.27686	ALYREF	10189
228641_at	-0.372883	-0.264973	-3.81825	0.00145809	0.26764	-1.27887	CARD8	22900
227742_at	0.681185	0.288312	3.81638	0.00146392	0.268298	-1.28277	CLIC6	54102
214475_x_at	-0.611489	-0.316447	-3.81533	0.00146721	0.268454	-1.28496	CAPN3,	825
223723_at	0.747596	-0.00122139	3.81498	0.00146831	0.268539	-1.28569	MELTF	4241
208368_s_at	-0.788945	-0.633044	-3.81276	0.00147528	0.269489	-1.29031	BRCA2	675
227614_at	1.18713	1.01218	3.80876	0.00148791	0.271083	-1.29864	HKDC1	80201
205796_at	-0.500594	-0.370519	-3.80401	0.00150307	0.272904	-1.30854	TCP11L1	55346
225847_at	0.536081	0.31185	3.7956	0.00153027	0.275888	-1.32605	NCEH1	57552
227111_at	0.376637	0.297059	3.79365	0.00153668	0.276704	-1.33013	ZBTB34	403341
202821_s_at	0.742904	0.272778	3.79279	0.0015395	0.276994	-1.33193	LPP	4026
202886_s_at	-0.34256	-0.320459	-3.78983	0.00154923	0.277844	-1.33808	PPP2R1B	5519
204182_s_at	0.45856	0.271293	3.78278	0.00157272	0.280753	-1.35276	ZBTB43	23099
221586_s_at	-0.405214	0.0841462	-3.77596	0.00159577	0.283307	-1.36697	E2F5	1875
218741_at	-0.840859	-0.468291	-3.77055	0.00161431	0.285262	-1.37824	CENPM	79019
205980_s_at	-0.478236	0.0630625	-3.76903	0.00161955	0.285855	-1.3814	ARHGAP8, PRR5-ARHGAP8	23779, 553158
229019_at	-0.478251	-0.290154	-3.76254	0.00164213	0.288386	-1.39491	ZNF385B	151126
215990_s_at	0.465074	0.282275	3.75756	0.00165968	0.290682	-1.40529	BCL6	604
202582_s_at	0.450111	0.299962	3.75538	0.00166741	0.291588	-1.40982	RANBP9	10048
207571_x_at	0.801285	0.260192	3.75464	0.00167007	0.291941	-1.41138	THEMIS2	9473
213927_at	0.819931	0.466237	3.75074	0.00168403	0.293503	-1.41949	MAP3K9	4293
202218_s_at	0.469625	0.250822	3.74964	0.00168799	0.29383	-1.42178	FADS2	9415
225950_at	0.518544	0.328558	3.74785	0.00169444	0.29484	-1.42551	SAMD8	142891
218004_at	0.344062	0.177926	3.74573	0.00170212	0.295612	-1.42992	BSDC1	55108
222624_s_at	-0.569765	0.0943565	-3.74296	0.00171224	0.296463	-1.4357	ZNF639	51193
212922_s_at	-0.3808	-0.324602	-3.74195	0.0017159	0.296798	-1.43778	SMYD2	56950
218802_at	-0.52492	-0.561273	-3.74154	0.00171743	0.296798	-1.43865	CCDC109B	55013
226341_at	-0.603369	-0.418663	-3.72852	0.00176583	0.301836	-1.46576	OTUD6B-AS1	100506365
225183_at	0.454803	0.473754	3.72243	0.00178893	0.303829	-1.47843	C16orf72	29035
225086_at	-0.527826	-0.347471	-3.72193	0.00179082	0.303937	-1.47946	FAM98B	283742
1554415_at	-0.659797	-0.363888	-3.7212	0.0017936	0.304138	-1.48097	TAF5L	27097
203543_s_at	0.663572	0.395529	3.71906	0.00180185	0.304446	-1.48544	KLF9	687
203264_s_at	-0.48646	-0.267624	-3.71439	0.0018199	0.306811	-1.49516	ARHGEF9	23229
209821_at	-1.27387	-0.437452	-3.71284	0.00182593	0.307372	-1.49838	IL33	90865
212944_at	0.367442	0.46894	3.70996	0.00183717	0.308398	-1.50436	SLC5A3	6526
218646_at	-0.418075	-0.264245	-3.70991	0.00183737	0.308398	-1.50447	HPF1	54969
204804_at	-0.524342	-0.284231	-3.70042	0.00187496	0.311591	-1.52421	TRIM21	6737
222236_s_at	-0.41377	-0.112888	-3.69346	0.00190306	0.313941	-1.5387	ASAP3	55616
233723_at	-0.36208	0.00665718	-3.68376	0.00194286	0.317538	-1.55887
227777_at	-0.40877	-0.046761	-3.68101	0.00195432	0.318758	-1.5646
214279_s_at	0.940757	-0.0643822	3.67746	0.00196916	0.319801	-1.57197	NDRG2	57447, 102465428
229428_at	-0.606284	-0.298044	-3.67033	0.0019994	0.322262	-1.58681	TIMM23B	100652748
204731_at	-0.569067	0.173447	-3.66975	0.00200188	0.322433	-1.58802	TGFBR3	7049
202037_s_at	-0.952237	0.106305	-3.6637	0.00202787	0.325282	-1.60058	SFRP1	6422
202780_at	-0.525341	-0.530905	-3.66053	0.00204167	0.32676	-1.60718	OXCT1	5019
211984_at	0.468462	-0.0563843	3.65435	0.00206875	0.329818	-1.62002	CALM1	801, 805
242786_at	0.628628	0.536903	3.65328	0.00207352	0.330231	-1.62226	SBF2-AS1	283104
240383_at	0.610359	0.557265	3.6513	0.00208231	0.331282	-1.62637	UBE2D3	7323
215085_x_at	0.318695	0.135181	3.64183	0.00212484	0.335835	-1.64605	DLEC1	9940
228754_at	1.28493	1.07618	3.64166	0.00212559	0.335835	-1.6464	SLC6A6	6533
235324_at	-0.561225	-0.282643	-3.63516	0.00215531	0.338515	-1.65991	SRSF3	6428
203661_s_at	0.609214	0.368841	3.63319	0.00216437	0.339551	-1.66399	TMOD1	7111
213892_s_at	-0.304944	-0.209087	-3.62581	0.00219874	0.343793	-1.67932	APRT	353
228145_s_at	0.577764	0.537547	3.62372	0.00220858	0.344537	-1.68366	ZNF398	57541
209825_s_at	-0.47667	-0.416202	-3.61982	0.00222707	0.345844	-1.69177	UCK2	7371, 100500832
202351_at	-0.295951	-0.161151	-3.61903	0.00223082	0.346029	-1.69341	ITGAV	3685
228172_at	-0.516734	-0.421618	-3.61692	0.0022409	0.347281	-1.6978
230444_at	0.656358	0.529563	3.6085	0.00228154	0.350606	-1.71528
209733_at	0.435471	0.379162	3.6022	0.00231243	0.353601	-1.72836
221952_x_at	-0.554296	-0.426404	-3.60126	0.0023171	0.353668	-1.73032	HMGN2P41, TRMT5, HMGN2P3,	57570
46256_at	0.356295	0.225435	3.59926	0.00232701	0.354466	-1.73447	SPSB3	90864
209118_s_at	-0.627433	-0.70728	-3.59881	0.00232922	0.354545	-1.73539	TUBA1A	7846
205505_at	-0.408064	-0.282282	-3.59836	0.00233147	0.354552	-1.73633	GCNT1	2650
209782_s_at	-0.524059	0.14688	-3.59516	0.00234747	0.356271	-1.74298	DBP	1628
227062_at	1.03105	0.627895	3.5936	0.00235529	0.356743	-1.74621	NEAT1	283131, 693197
204871_at	-0.58049	-0.377625	-3.59122	0.00236731	0.357967	-1.75116
214240_at	0.856175	-0.176883	3.58982	0.00237439	0.358919	-1.75406	GAL	51083
208836_at	-0.370354	0.0743481	-3.58932	0.00237692	0.358944	-1.7551	ATP1B3, ATP1B3P1	483
205072_s_at	-0.610151	-0.406368	-3.58478	0.00240005	0.360951	-1.76451	XRCC4	7518
221041_s_at	0.386061	0.325464	3.57782	0.00243596	0.363287	-1.77895	SLC17A5	26503
201662_s_at	0.381954	0.486753	3.57652	0.00244277	0.36382	-1.78166	ACSL3	2181
239897_at	-0.396106	-0.300767	-3.5736	0.00245805	0.365273	-1.78772	BCLAF1	9774
206004_at	0.477418	-0.195464	3.57255	0.00246355	0.365592	-1.78989	TGM3	7053
233488_at	1.32503	0.383072	3.57212	0.0024658	0.365717	-1.79078
213762_x_at	-0.601106	-0.43173	-3.57016	0.00247614	0.366504	-1.79485	RBMX, , RBMXP2	27316
201302_at	-0.534025	-0.427321	-3.56921	0.00248115	0.366886	-1.79681	ANXA4	307
201855_s_at	0.44772	0.342005	3.56876	0.00248356	0.367006	-1.79775	ATMIN	23300
203208_s_at	-0.426873	0.0210275	-3.56565	0.0025001	0.368826	-1.8042	MTFR1	9650
220786_s_at	-0.963098	-0.315058	-3.56195	0.00251991	0.370331	-1.81187	SLC38A4	55089
202626_s_at	0.547203	0.328855	3.56154	0.00252212	0.370536	-1.81272	LYN	4067
227124_at	0.35593	0.358568	3.56128	0.00252352	0.370541	-1.81326	SMIM13	221710
203662_s_at	0.502451	0.389405	3.54907	0.00259016	0.376761	-1.83858	TMOD1	7111
223018_at	-0.323847	0.0428768	-3.54714	0.00260086	0.377535	-1.84258	, NOB1	28987
208753_s_at	-0.393547	0.0306685	-3.54671	0.00260324	0.377535	-1.84347	, NAP1L1	4673
45714_at	-0.541539	0.149329	-3.54667	0.00260346	0.377535	-1.84355	HCFC1R1	54985
217672_x_at	0.401289	0.269244	3.54661	0.0026038	0.377535	-1.84368
202537_s_at	0.351923	-0.0414204	3.54546	0.00261021	0.378065	-1.84606	CHMP2B	25978
202884_s_at	-0.281443	-0.383962	-3.53694	0.00265809	0.381502	-1.86372	PPP2R1B	5519
217889_s_at	-0.761634	0.229299	-3.52293	0.00273878	0.387957	-1.89274	CYBRD1	79901
229390_at	0.430081	0.401479	3.52269	0.00274017	0.388033	-1.89324	FAM26F	441168
228235_at	-1.05204	-0.853403	-3.51935	0.00275976	0.390079	-1.90015	MIR503HG	84848, 494336
207850_at	1.03034	0.285302	3.51854	0.00276455	0.390237	-1.90183	CXCL3	2921
1554097_a_at	0.659522	0.763956	3.51811	0.00276708	0.390263	-1.90272	MIR31HG
212847_at	-0.461139	-0.369112	-3.5148	0.00278673	0.391579	-1.90959
209724_s_at	-0.459848	0.097398	-3.50811	0.00282678	0.395515	-1.92343	ZBTB14	7541
225161_at	-0.458443	-0.307408	-3.50577	0.00284092	0.396452	-1.92827	GFM1	85476
201660_at	0.447306	0.422544	3.49916	0.00288128	0.3998	-1.94195	ACSL3	2181
201998_at	-0.476122	0.0841921	-3.49701	0.00289455	0.401152	-1.94641	ST6GAL1	6480
235117_at	-0.617751	-0.442974	-3.49604	0.00290054	0.401738	-1.94842	CHAC2	494143
227796_at	-0.480117	-0.263658	-3.49442	0.00291059	0.402138	-1.95177	ZFP62	643836
225100_at	0.373989	0.274713	3.49294	0.00291981	0.402934	-1.95484	FBXO45	200933
33736_at	-0.388397	-0.145086	-3.48685	0.00295799	0.406343	-1.96744	STOML1	9399
222879_s_at	-0.641636	-0.431872	-3.48682	0.00295818	0.406343	-1.9675	POLH	5429
228141_at	-0.783023	0.303098	-3.48476	0.0029712	0.407553	-1.97176	GPX8	493869
1554342_s_at	-0.366751	-0.227489	-3.48418	0.00297488	0.407935	-1.97296	HELQ	113510
234488_s_at	-0.513391	0.131272	-3.48261	0.00298488	0.408936	-1.97621	GMCL1, GMCL1P1	64395
227814_at	0.405638	0.255263	3.48206	0.00298838	0.409029	-1.97735	WDR53	348793
227999_at	0.338633	0.214452	3.48167	0.00299086	0.409029	-1.97815	PWWP2B	170394
228234_at	0.524897	0.317584	3.47905	0.00300761	0.410607	-1.98357	TMED7-TICAM2, TICAM2	100302736, 353376
229920_at	0.535615	0.434153	3.47813	0.00301353	0.411004	-1.98547	RBCK1	10616
228105_at	0.366668	0.410801	3.47697	0.00302101	0.411654	-1.98787
215111_s_at	0.508022	0.359805	3.47575	0.00302883	0.412473	-1.99038	TSC22D1	8848
1562529_s_at	0.600051	0.379887	3.4748	0.00303497	0.412766	-1.99235
214440_at	-0.705867	-0.478664	-3.46988	0.00306703	0.414571	-2.00253	NAT1	9
204364_s_at	-0.814756	-0.57332	-3.46917	0.00307166	0.414828	-2.00399	REEP1	65055
226381_at	0.415636	0.362861	3.46431	0.00310369	0.417359	-2.01404
219587_at	-0.415067	-0.36151	-3.45918	0.0031378	0.419718	-2.02464	TTC12	54970
204600_at	0.632808	0.314533	3.45663	0.00315491	0.421317	-2.02991	EPHB3	2049
226822_at	0.474138	0.280282	3.45603	0.00315899	0.421614	-2.03116	STOX2	56977
202234_s_at	-0.363117	0.0439165	-3.45472	0.0031678	0.421799	-2.03385	SLC16A1	6566
223206_s_at	-0.318547	-0.182303	-3.45285	0.00318044	0.423097	-2.03771	NMRAL1	57407
205005_s_at	-0.384253	-0.327266	-3.44949	0.00320332	0.425284	-2.04466	NMT2	9397
243287_s_at	0.524648	0.347004	3.44878	0.00320822	0.425618	-2.04614
209143_s_at	-0.380925	0.0529977	-3.44628	0.00322532	0.427364	-2.05129	CLNS1A	1207
219204_s_at	-0.322945	-0.218328	-3.44119	0.00326051	0.429678	-2.06179	SRR	63826
226271_at	-0.642442	-0.509598	-3.43626	0.00329501	0.432659	-2.07199	GDAP1	54332
215716_s_at	0.370434	0.301506	3.43506	0.00330344	0.433204	-2.07446	ATP2B1	490
212919_at	0.469861	0.391364	3.43499	0.00330393	0.433204	-2.07461	DCP2	167227
200697_at	0.399865	0.358844	3.43181	0.00332642	0.434778	-2.08117	HK1	3098
223878_at	0.548053	-0.0555251	3.42888	0.00334725	0.435644	-2.08722	INPP4B	8821
215125_s_at	1.2564	0.840182	3.42821	0.00335204	0.435644	-2.0886	UGT1A9, UGT1A4, UGT1A10, UGT1A3, UGT1A6, UGT1A8, UGT1A7, UGT1A1, UGT1A5	54600, 54657, 54575, 54659, 54578, 54576, 54577, 54658, 54579
236359_at	-1.16836	0.0147571	-3.42815	0.00335246	0.435644	-2.08872	SCN4B	6330
202657_s_at	0.502509	0.358052	3.42702	0.00336054	0.436227	-2.09106	SERTAD2	9792
1566766_a_at	-1.1238	-0.709777	-3.42337	0.00338682	0.438561	-2.0986	MACC1	346389
244025_at	0.766672	0.553973	3.42138	0.0034012	0.439872	-2.1027	ITPRIP	85450
224469_s_at	0.855523	0.795968	3.41824	0.00342401	0.442068	-2.10917	INF2	64423
232315_at	-0.522411	-0.46166	-3.41393	0.00345562	0.444509	-2.11806	ZNF880	400713
209711_at	-0.557413	-0.33832	-3.40656	0.00351035	0.448757	-2.13326	SLC35D1	23169
203212_s_at	-0.32038	-0.271713	-3.39979	0.00356141	0.452826	-2.14723	MTMR2	8898
227437_at	-0.513096	-0.327694	-3.39942	0.00356416	0.452836	-2.14798	NRAV	100506668
204143_s_at	-0.369243	-0.292972	-3.3986	0.00357041	0.453149	-2.14968	ENOSF1	55556
1553989_a_at	0.806016	-0.268541	3.39816	0.00357379	0.453426	-2.15059	ATP6V1C2	245973
219861_at	-0.355591	-0.214391	-3.39462	0.0036008	0.455407	-2.15787	DNAJC17	55192
210250_x_at	-0.351349	-0.275008	-3.39379	0.00360721	0.455886	-2.15959	ADSL	158
226353_at	0.353905	0.100033	3.39106	0.00362827	0.457785	-2.16522	SPPL2A	84888
224817_at	0.602876	0.430922	3.38854	0.00364779	0.45941	-2.17041	SH3PXD2A	9644
208668_x_at	-0.482514	-0.371122	-3.3865	0.00366364	0.46037	-2.17461	HMGN2P41, RPL12P38, HMGN2P17, HMGN2P3, HMGN2P5, HMGN2, HMGN2P6	3151
203354_s_at	-0.579432	0.0124871	-3.38576	0.00366947	0.460937	-2.17614	PSD3	23362
205828_at	1.15909	1.55938	3.3845	0.00367933	0.461335	-2.17874	MMP3	4314
226631_at	-0.524846	-0.372929	-3.3822	0.00369735	0.462718	-2.18346	METTL10	399818
242079_at	0.460265	0.367089	3.3821	0.00369814	0.462718	-2.18367	RGS12	6002
209875_s_at	1.88628	1.36278	3.38145	0.00370332	0.462888	-2.18502	SPP1	6696
222595_s_at	-0.31946	-0.289514	-3.37854	0.00372631	0.465122	-2.191	DIDO1	11083
204466_s_at	-0.671479	-0.175805	-3.37548	0.00375068	0.467198	-2.19731	SNCA	6622
202282_at	-0.337185	-0.236162	-3.37488	0.00375549	0.467486	-2.19854	, HSD17B10	3028
213813_x_at	-0.716619	-0.550143	-3.37356	0.00376607	0.467902	-2.20126
229578_at	-0.489891	-0.37724	-3.36841	0.00380762	0.47075	-2.21187	JPH2	57158
206500_s_at	-0.570395	-0.27959	-3.3674	0.00381579	0.471376	-2.21394	MIS18BP1	55320
203758_at	-0.559776	-0.5147	-3.36277	0.00385358	0.474113	-2.22347	CTSO	1519
206363_at	-0.71079	-0.084542	-3.35825	0.00389093	0.477416	-2.23278	MAF	4094
206441_s_at	-0.414829	-0.309425	-3.35391	0.00392704	0.480105	-2.24171	COMMD4	54939
202455_at	0.560387	0.396269	3.35384	0.00392761	0.480105	-2.24185	HDAC5	10014
226308_at	-0.490162	-0.0772062	-3.34751	0.00398092	0.482857	-2.25487	HAUS8	93323
217356_s_at	-0.31865	-0.354754	-3.34399	0.00401082	0.484833	-2.2621	PGK1	5230
203744_at	-0.376958	-0.648338	-3.33567	0.00408255	0.491143	-2.27922	HMGB3	3149
217777_s_at	-0.566395	-0.0635329	-3.33494	0.00408883	0.49162	-2.2807	HACD3	51495
226907_at	-0.368926	-0.358267	-3.33258	0.00410947	0.493203	-2.28556	PPP1R14C	81706
242775_at	1.02034	1.19238	3.32342	0.00419033	0.498944	-2.30437
226202_at	0.587834	0.476305	3.31757	0.00424279	0.501906	-2.31638	ZNF398	57541
210904_s_at	0.398184	-0.160862	3.3166	0.00425164	0.50256	-2.31839	IL13RA1	3597
201195_s_at	0.844193	0.757575	3.31381	0.0042769	0.504497	-2.3241	SLC7A5	8140
238962_at	-0.369389	-0.299426	-3.31238	0.0042899	0.50527	-2.32703	ZNF681	148213
210200_at	0.34612	0.0129475	3.30633	0.00434547	0.509601	-2.33945	WWP2	11060
218498_s_at	0.415153	-0.239564	3.29404	0.00446062	0.517842	-2.36467	ERO1A	30001
235678_at	-0.466124	0.0506051	-3.29074	0.00449204	0.520559	-2.37144	GM2A	2760
222931_s_at	-0.961616	-0.540873	-3.28852	0.00451322	0.521352	-2.37597	THNSL1	79896
225258_at	0.517609	0.47998	3.2875	0.0045231	0.521699	-2.37808	FBLIM1	54751
1556715_at	0.391426	0.198101	3.28371	0.00455963	0.523539	-2.38584	PRPSAP1	5635
221227_x_at	-0.510466	-0.337438	-3.28349	0.00456178	0.523539	-2.38629	COQ3	51805
229784_at	-0.521079	-0.41344	-3.28335	0.00456316	0.523539	-2.38658	MIR503HG	84848, 494336
222434_at	-0.544227	-0.0262238	-3.282	0.00457621	0.524303	-2.38934	ENAH	55740
244417_at	0.274936	-0.0539613	3.27273	0.0046673	0.530711	-2.40833
231431_s_at	-0.361484	-0.265759	-3.27163	0.0046783	0.531448	-2.4106	INAFM2
220161_s_at	-0.411419	-0.303869	-3.26974	0.00469705	0.532249	-2.41446	EPB41L4B	54566
208083_s_at	-0.701353	-0.590251	-3.26831	0.0047114	0.532904	-2.41739	ITGB6	3694, 100505984
231618_s_at	0.872129	0.667897	3.26825	0.004712	0.532904	-2.41752	SUN3	256979
228017_s_at	0.471365	0.342632	3.26219	0.00477301	0.537073	-2.42991	NKAIN4	128414
227068_at	-0.375755	-0.479689	-3.2612	0.00478314	0.53785	-2.43195	PGK1	5230
200737_at	-0.31443	-0.425834	-3.25974	0.00479796	0.539067	-2.43493	PGK1	5230
37950_at	-0.44088	-0.330811	-3.25597	0.0048365	0.541441	-2.44264	PREP	5550
204142_at	-0.34226	-0.317545	-3.25262	0.00487104	0.543758	-2.44949	ENOSF1	55556
222825_at	-0.591338	-0.401903	-3.25106	0.00488728	0.544579	-2.4527	OTUD6B	51633
244261_at	0.573922	0.458989	3.25062	0.00489178	0.544947	-2.45358	IFNLR1	163702
210987_x_at	-0.831108	-0.66895	-3.24614	0.00493864	0.547619	-2.46276	TPM1	7168
219182_at	-0.460012	-0.239474	-3.24438	0.00495705	0.548991	-2.46634	TMEM231	79583
228452_at	0.452988	0.256212	3.24337	0.00496772	0.549472	-2.46841	GID4	79018
219571_s_at	-0.435923	-0.173594	-3.24336	0.00496783	0.549472	-2.46843	ZNF12	7559
208319_s_at	-0.321209	-0.477806	-3.23931	0.0050107	0.552409	-2.47671	RBM3	5935
228398_at	-0.774468	-0.559744	-3.23828	0.00502174	0.552523	-2.47883	SENP8	123228
206034_at	0.710704	0.0147208	3.23765	0.00502842	0.553124	-2.4801	SERPINB8	5271
213776_at	0.429112	0.310675	3.23642	0.00504157	0.554034	-2.48262
211932_at	-0.52328	-0.320946	-3.23421	0.00506527	0.554763	-2.48713	HNRNPA3	220988, 100616394
222725_s_at	-1.07765	-0.54611	-3.23051	0.00510529	0.557221	-2.4947	PALMD	54873
218214_at	0.352452	0.288793	3.22704	0.00514303	0.559239	-2.50179	ATG101	60673
238513_at	-0.782179	-0.121153	-3.22078	0.00521182	0.565368	-2.51457	PRRG4	79056
218003_s_at	-0.279438	-0.285756	-3.21413	0.00528588	0.57089	-2.52815	FKBP3	2287
231851_at	-0.623919	0.0999256	-3.21234	0.00530593	0.572441	-2.53179	RAVER2	55225
204174_at	-0.519125	-0.0246841	-3.2107	0.00532442	0.573208	-2.53513	ALOX5AP	241
218374_s_at	-0.418862	-0.293639	-3.20831	0.00535155	0.57539	-2.54002	C12orf4	57102
231890_at	0.372393	0.206838	3.2073	0.00536305	0.575863	-2.54208	SEC22B	9554
221873_at	0.416842	0.384637	3.20711	0.00536514	0.575863	-2.54246	ZNF143	7702
212501_at	0.568429	0.514673	3.20691	0.0053675	0.575863	-2.54288	CEBPB	1051
224160_s_at	-0.375818	-0.28984	-3.20286	0.0054138	0.578009	-2.55114	ACAD9	28976
227165_at	-0.717261	-0.436673	-3.20277	0.00541476	0.578009	-2.55131	SKA3	221150
238557_at	-0.344353	-0.359036	-3.20126	0.00543215	0.579321	-2.55439	CHKB-AS1	100144603
227415_at	0.288416	0.270391	3.19737	0.00547711	0.581525	-2.56232	DGKH	160851
228832_at	-0.262317	-0.125671	-3.1944	0.00551172	0.582897	-2.56837		90024
212901_s_at	-0.487997	-0.386068	-3.19061	0.00555623	0.584874	-2.5761	CSTF2T	23283
211755_s_at	-0.324341	-0.230446	-3.19037	0.00555905	0.585036	-2.57659	ATP5F1	515
203460_s_at	0.3057	0.0969091	3.18752	0.00559273	0.58677	-2.58239	PSEN1	5663
222240_s_at	0.367778	0.257033	3.18097	0.00567101	0.591916	-2.59575	ISYNA1	51477
214252_s_at	-0.328209	-0.248853	-3.18058	0.00567561	0.592141	-2.59652	CLN5,	1203
219630_at	-0.875662	-0.520064	-3.18055	0.00567603	0.592141	-2.5966	PDZK1IP1	10158
228464_at	0.49316	0.228285	3.17781	0.00570906	0.594979	-2.60217	MIR3685	100500802
219288_at	-0.533764	-0.423674	-3.17733	0.00571489	0.594979	-2.60315	C3orf14	57415
228189_at	-0.35705	0.0914838	-3.17719	0.00571655	0.594979	-2.60343	BAG4	9530
218746_at	-0.355476	-0.200213	-3.16975	0.00580748	0.60022	-2.61859	TAPBPL	55080
228250_at	0.573782	0.468066	3.16725	0.00583829	0.601617	-2.62367	FNIP1	96459
206561_s_at	1.63183	1.30431	3.1656	0.00585873	0.60304	-2.62702	AKR1B10	57016
213018_at	0.270296	0.25555	3.16154	0.00590937	0.606742	-2.63528	GATAD1	57798
226015_at	-0.399424	-0.174183	-3.16067	0.00592028	0.607418	-2.63705	ZNF12	7559
226875_at	0.586168	0.403743	3.15984	0.00593066	0.607968	-2.63874	DOCK11	139818
222844_s_at	-0.472796	-0.361901	-3.15843	0.00594835	0.609054	-2.6416	SRR	63826
212314_at	0.349922	0.235308	3.15836	0.0059493	0.609054	-2.64175	SEL1L3	23231
205164_at	-0.316665	-0.336521	-3.15566	0.00598335	0.611714	-2.64723	GCAT	23464
202084_s_at	0.422823	0.289324	3.15484	0.00599383	0.61251	-2.64891	SEC14L1	6397
204053_x_at	0.375177	0.240937	3.1501	0.00605429	0.616473	-2.65854	PTENP1, PTEN	11191, 5728
213532_at	0.333382	0.298403	3.14915	0.00606637	0.616989	-2.66045	ADAM17	6868
241708_at	-0.383762	-0.291017	-3.14344	0.00614022	0.620665	-2.67206	DOCK1	1793
201016_at	-0.315835	-0.301698	-3.13985	0.00618706	0.623576	-2.67935	EIF1AXP1, EIF1AX	1964
238642_at	0.360601	0.264389	3.13501	0.00625078	0.627628	-2.68918	ANKRD13D	338692
221190_s_at	0.328426	0.250448	3.13436	0.00625939	0.6281	-2.6905	C18orf8	29919
230570_at	-0.29876	-0.358193	-3.13268	0.00628166	0.62934	-2.6939	EIF3H	8667
214340_at	0.291745	0.138137	3.13077	0.00630713	0.631332	-2.69778	ALOX12P2	245
235736_at	0.446818	0.269903	3.1291	0.00632942	0.632731	-2.70117	SMKR1	100287482
39650_s_at	0.37135	0.351161	3.12294	0.00641244	0.637388	-2.71366	PCNX2	80003
230664_at	-0.434843	-0.150514	-3.12031	0.00644821	0.640383	-2.71899
201308_s_at	-0.528177	-0.463179	-3.11989	0.00645388	0.640641	-2.71983	SEPT11	55752
243271_at	-0.546079	-0.512	-3.1184	0.00647435	0.641979	-2.72287
223950_s_at	0.298142	0.388677	3.11688	0.00649516	0.643521	-2.72595	FLYWCH1	84256
219043_s_at	-0.46361	-0.490057	-3.11295	0.00654933	0.646129	-2.73391	PDCL3P5, PDCL3, PDCL3P4, PDCL3P6	79031
214649_s_at	-0.271195	-0.186392	-3.1129	0.0065501	0.646129	-2.73402	MTMR2	8898
218334_at	-0.347045	-0.29157	-3.11136	0.0065714	0.647809	-2.73713	THOC7	80145
1552678_a_at	-0.358092	0.0811908	-3.10492	0.00666152	0.654565	-2.75018	USP28	57646
202036_s_at	-0.597345	0.00457616	-3.10117	0.00671442	0.657118	-2.75776	SFRP1	6422
201060_x_at	-0.400809	0.0433839	-3.09233	0.00684102	0.665825	-2.77565	STOM	2040
209045_at	-0.243631	-0.158032	-3.08653	0.00692543	0.671228	-2.78739	XPNPEP1	7511
214804_at	-0.887307	-0.558964	-3.08644	0.00692674	0.671228	-2.78757	CENPI	2491
227921_at	-0.47905	-0.293104	-3.08565	0.00693823	0.672026	-2.78915
218027_at	-0.354316	-0.216279	-3.08139	0.00700105	0.675093	-2.79778	MRPL15	29088
242281_at	-0.709375	-0.551448	-3.08105	0.00700609	0.67515	-2.79847	GLUL	2752
217938_s_at	0.287786	0.271507	3.07975	0.00702532	0.67643	-2.80109	KCMF1	56888
232422_at	-0.4611	-0.353997	-3.07804	0.00705065	0.677926	-2.80454	GGACT	87769
201987_at	0.29071	0.264196	3.07762	0.00705697	0.678114	-2.8054	MED13	9969
1554341_a_at	-0.392698	-0.211729	-3.07617	0.00707852	0.679252	-2.80831	HELQ	113510
223441_at	0.505571	0.382046	3.07305	0.00712544	0.681941	-2.81464	SLC17A5	26503
227176_at	0.355373	0.221827	3.07178	0.00714452	0.681952	-2.81719	SLC2A13	114134
218756_s_at	-0.629647	-0.866679	-3.0717	0.00714564	0.681952	-2.81734	DHRS11	79154
217721_at	-0.356205	-0.326614	-3.06633	0.00722715	0.686418	-2.82819	SEPT7	989
205961_s_at	-0.788023	-0.0267331	-3.06394	0.00726375	0.688314	-2.83303	PSIP1	11168
242343_x_at	0.44488	0.162209	3.06302	0.0072778	0.688713	-2.83487
208453_s_at	-0.283834	-0.249448	-3.06175	0.00729734	0.689543	-2.83744	XPNPEP1	7511
244689_at	0.434296	0.40673	3.05862	0.00734567	0.691609	-2.84375	PPARA	5465
210580_x_at	0.284692	0.344622	3.05646	0.00737929	0.693483	-2.84812	SULT1A4, SLX1B-SULT1A4, SLX1A-SULT1A3, SULT1A3	445329, 105369243, 100526830, 100526831, 6818
202266_at	0.404438	0.310032	3.05626	0.00738239	0.693562	-2.84852	TDP2	51567
213233_s_at	-0.415246	-0.347215	-3.05476	0.00740577	0.69468	-2.85154	KLHL9	55958
1554466_a_at	-0.267468	-0.159588	-3.04976	0.00748421	0.698899	-2.86162	C16orf13	84326
232004_at	-0.488342	0.213668	-3.04738	0.00752191	0.700518	-2.86642	HNRNPR	10236
209688_s_at	0.255441	0.250767	3.04592	0.00754504	0.702097	-2.86935	CCDC93	54520
203219_s_at	-0.261113	-0.21041	-3.04415	0.00757334	0.703866	-2.87293	APRT	353
240259_at	-0.912483	-0.688943	-3.04332	0.00758656	0.704432	-2.8746	FLRT2	23768
202591_s_at	-0.320704	-0.259456	-3.04301	0.00759154	0.704685	-2.87523	SSBP1	6742
209281_s_at	0.296372	0.307665	3.03502	0.00772039	0.710564	-2.89131	ATP2B1	490
203840_at	0.33582	-0.118615	3.0335	0.0077453	0.711704	-2.89439	BLZF1	8548
1555326_a_at	-0.271184	-0.235235	-3.02513	0.00788301	0.720782	-2.91122	ADAM9	8754
227035_x_at	-0.254698	0.143393	-3.02292	0.00791974	0.722624	-2.91566	RP9P, RP9	441212, 6100
219479_at	-0.45449	0.116003	-3.02212	0.00793312	0.723229	-2.91727	KDELC1	79070
205541_s_at	-0.378453	-0.291282	-3.01887	0.00798773	0.725377	-2.92382	GSPT2	23708
1555731_a_at	-0.370924	-0.458599	-3.01746	0.00801133	0.726898	-2.92664	AP1S3	130340
203414_at	0.300976	0.220308	3.01709	0.00801764	0.72718	-2.92739	MMD	23531
226431_at	-0.498864	0.06574	-3.01048	0.00813001	0.732987	-2.94067	FAM117B	150864
217499_x_at	-0.288236	-0.27947	-3.00744	0.00818214	0.736374	-2.94677	OR7E38P, OR7E11P, OR7E162P, OR7E12P, OR7E39P, OR7E66P, OR7E36P, OR7E37P, DAPL1, OR7E28P, OR7E33P, OR7E106P	92196
210758_at	-0.52705	0.127412	-3.00665	0.00819585	0.736879	-2.94837	PSIP1	11168
209403_at	0.417667	0.383569	3.00477	0.00822821	0.738653	-2.95213	TBC1D3, TBC1D3K, TBC1D3L, TBC1D3F, TBC1D3D, TBC1D3I, TBC1D3P2, TBC1D3B, TBC1D3C, TBC1D3H, TBC1D3J, TBC1D3G, TBC1D3E	729873, 101060351, 102723859, 101060376, 84218, 101060389, 102724862, 414059, 414060, 729877, 101060321
201860_s_at	0.964474	0.514265	3.00006	0.00831025	0.743636	-2.9616	PLAT	5327
213998_s_at	0.375379	-0.0250281	2.99798	0.00834672	0.746172	-2.96577	DDX17	10521
221480_at	-0.72258	-0.571115	-2.99441	0.00840954	0.75016	-2.97292	HNRNPD	3184
242228_at	-0.541873	-0.38558	-2.98977	0.00849204	0.754926	-2.98224
226710_at	0.434069	0.481478	2.98865	0.00851212	0.75508	-2.98449	C8orf82	414919
203329_at	-0.343693	0.1409	-2.9884	0.00851662	0.75508	-2.98499	PTPRM	5797
202140_s_at	0.346074	0.271807	2.9877	0.00852911	0.755736	-2.98639	CLK3	1198
224478_s_at	-0.405243	-0.370086	-2.98582	0.00856282	0.757596	-2.99015	C7orf50	84310
1552684_a_at	-0.639016	-0.426462	-2.98236	0.00862548	0.760482	-2.9971	SENP8	123228
35148_at	0.352828	0.308333	2.98182	0.00863525	0.760893	-2.99818
1566901_at	0.46898	0.465584	2.97403	0.00877774	0.768534	-3.01378
237701_at	-0.354342	-0.175306	-2.97138	0.00882667	0.771334	-3.01907	C12orf54	121273
200965_s_at	0.318954	0.286762	2.96998	0.00885272	0.773314	-3.02188	ABLIM1	3983
225582_at	0.597163	0.537608	2.96987	0.00885481	0.773348	-3.02211	ITPRIP	85450
208920_at	-0.598591	-0.621749	-2.96833	0.00888343	0.774657	-3.02518	SRI	6717
225239_at	0.799975	0.57573	2.96396	0.00896533	0.778665	-3.03392	NEAT1	283131, 693197
214974_x_at	1.2686	-0.150043	2.95929	0.00905365	0.783195	-3.04326	CXCL5	6374
219163_at	0.225607	0.0928009	2.95786	0.00908094	0.78416	-3.04613	ZNF562	54811
204459_at	-0.319269	-0.204675	-2.95521	0.00913165	0.787247	-3.05143	CSTF2	1478
224173_s_at	-0.532771	-0.489182	-2.95037	0.0092249	0.792283	-3.0611	, MRPL30	51263
235281_x_at	-0.343153	-0.324716	-2.94919	0.00924771	0.79326	-3.06345	AHNAK	79026
220417_s_at	-0.277886	0.0506969	-2.94569	0.00931588	0.796637	-3.07044	THAP4	51078
243880_at	0.452955	0.287114	2.9386	0.00945545	0.802421	-3.08459	GOSR2	9570
204106_at	0.415031	0.392854	2.93266	0.00957394	0.808371	-3.09644	TESK1	7016
203069_at	0.366217	0.321945	2.93127	0.00960188	0.8094	-3.09921	SV2A	9900
216235_s_at	0.385845	0.282864	2.93008	0.00962592	0.810744	-3.10159	EDNRA	1909
210609_s_at	0.473117	-0.167425	2.92356	0.00975832	0.816602	-3.11458	TP53I3	9540
217810_x_at	-0.404417	-0.0549642	-2.92335	0.00976248	0.816602	-3.11499	LARS	51520
201904_s_at	-0.328361	0.108766	-2.92315	0.00976666	0.816602	-3.1154	CTDSPL	10217
230275_at	0.319123	0.32036	2.92307	0.00976838	0.816602	-3.11556	ARSI	340075
231408_at	0.58932	0.290842	2.92214	0.00978743	0.817178	-3.11741	TMEM92	162461
220470_at	0.274642	0.00690476	2.92	0.00983136	0.819104	-3.12167	BET1L	51272
205745_x_at	0.331425	0.298701	2.91491	0.00993679	0.823986	-3.13181	ADAM17	6868
201418_s_at	-0.429721	-0.365765	-2.91403	0.00995501	0.824654	-3.13355	SOX4	6659

## Sheet: WS_CM
AffyIDs	logFC	AveExpr	t	P.Value	adj.P.Val	B	Gene_Symbol	EntrezID
1562102_at	4.95712	2.29653	27.9199	3.02083e-15	1.37402e-09	23.013
201467_s_at	3.13824	1.19491	25.2423	1.52e-14	3.45686e-09	21.8976	NQO1	1728
201468_s_at	3.51803	1.37364	24.4216	2.57752e-14	3.90793e-09	21.5167	NQO1	1728
210519_s_at	2.8487	1.06142	23.5817	4.50444e-14	5.12209e-09	21.1058	NQO1	1728
204151_x_at	2.6456	1.51993	19.2797	1.09388e-12	9.95097e-08	18.6047	AKR1C1, AKR1C2	1645, 1646
226702_at	-2.64799	-1.38142	-18.8239	1.59297e-12	1.2076e-07	18.2942	CMPK2	129607
202437_s_at	5.88404	3.17904	18.4384	2.20344e-12	1.43176e-07	18.0237	CYP1B1	1545
216594_x_at	3.01295	1.60501	17.9002	3.50259e-12	1.99144e-07	17.6335	AKR1C1, AKR1C2	1645, 1646
201266_at	2.19264	1.04128	17.4812	5.06926e-12	2.56194e-07	17.3191	TXNRD1	7296
209699_x_at	2.89576	1.50736	17.1611	6.76049e-12	3.075e-07	17.0724	AKR1C1, AKR1C2	1645, 1646
203665_at	4.71654	1.42808	16.9242	8.39204e-12	3.4701e-07	16.8861	HMOX1	3162
202435_s_at	4.88443	2.39609	16.0633	1.8847e-11	7.14377e-07	16.1812	CYP1B1	1545
AFFX-HUMISGF3A/M97935_MA_at	-1.80366	-0.805203	-15.9622	2.0779e-11	7.27024e-07	16.0954	STAT1	6772
204972_at	-2.65374	-1.31724	-15.7578	2.5352e-11	7.81885e-07	15.9199	OAS2	4939
211653_x_at	2.75068	1.53109	15.7405	2.5785e-11	7.81885e-07	15.9049	AKR1C1, AKR1C2	1645, 1646
202436_s_at	5.3119	2.96377	15.6681	2.76829e-11	7.8697e-07	15.8421	CYP1B1	1545
203764_at	-5.30865	-1.74898	-15.2218	4.3181e-11	1.14102e-06	15.4468	DLGAP5	9787
203153_at	-4.98389	-2.24248	-15.1775	4.51545e-11	1.14102e-06	15.4069	IFIT1	3434
231897_at	1.73278	0.674218	14.907	5.94943e-11	1.42426e-06	15.1599	, PTGR1	22949
204439_at	-5.18592	-1.82034	-14.7153	7.25236e-11	1.64936e-06	14.9817	IFI44L	10964
228824_s_at	1.77444	0.708492	14.6034	8.14936e-11	1.76511e-06	14.8765	, PTGR1	22949
203925_at	2.03667	0.782511	14.4858	9.22014e-11	1.8879e-06	14.765	GCLM	2730
219454_at	-3.82395	-0.991661	-14.4528	9.54643e-11	1.8879e-06	14.7335	EGFL6	25975
201842_s_at	-1.5101	-0.501847	-14.227	1.21353e-10	2.19086e-06	14.5158	EFEMP1	2202
230314_at	-1.64472	-0.816707	-14.2185	1.22464e-10	2.19086e-06	14.5075
218755_at	-4.63057	-1.49846	-14.1976	1.25234e-10	2.19086e-06	14.4872	KIF20A	10112
214059_at	-2.87968	-1.32105	-14.1116	1.3736e-10	2.19678e-06	14.4031	IFI44	10561
219352_at	-1.90944	-0.863958	-14.0988	1.39269e-10	2.19678e-06	14.3905	HERC6	55008
218986_s_at	-3.1803	-1.46122	-14.0935	1.40061e-10	2.19678e-06	14.3853	DDX60	55601
AFFX-HUMISGF3A/M97935_MB_at	-1.95666	-0.862108	-13.9115	1.7061e-10	2.58672e-06	14.2053	STAT1	6772
224399_at	-1.48136	-0.596715	-13.8227	1.88022e-10	2.75877e-06	14.1164	PDCD1LG2	80380
227764_at	-1.58774	-0.251604	-13.7457	2.04611e-10	2.90834e-06	14.039	LYPD6	130574
205552_s_at	-2.60218	-0.92135	-13.6926	2.16967e-10	2.99051e-06	13.9852	OAS1	4938
201649_at	-1.44081	-0.469723	-13.4217	2.93454e-10	3.92579e-06	13.7075	UBE2L6	9246
241418_at	3.46418	1.27607	13.2377	3.6131e-10	4.69546e-06	13.5155
202869_at	-2.369	-0.847363	-13.1771	3.87142e-10	4.89142e-06	13.4517	OAS1	4938
213294_at	-1.44928	-0.523575	-13.1486	3.99973e-10	4.91594e-06	13.4215	EIF2AK2	5610
214453_s_at	-2.99473	-1.53918	-13.1254	4.10699e-10	4.91594e-06	13.397	IFI44	10561
235570_at	-2.06029	-0.717487	-13.068	4.38672e-10	5.11613e-06	13.3359	RBMS3	27303
235276_at	-3.03662	-0.874593	-12.9039	5.303e-10	6.03015e-06	13.1599	EPSTI1	94240
207528_s_at	3.30966	1.46737	12.7445	6.38777e-10	7.08651e-06	12.9867	SLC7A11	23657
205828_at	4.35489	1.55938	12.7161	6.60449e-10	7.15248e-06	12.9556	MMP3	4314
202831_at	2.3809	1.30977	12.5536	8.00318e-10	8.46566e-06	12.7763	GPX2	2877
204994_at	-2.70216	-1.12084	-12.4422	9.14101e-10	9.44949e-06	12.6519	MX2	4600
202095_s_at	-3.7239	-1.34259	-12.3897	9.73512e-10	9.84001e-06	12.593	BIRC5	332
204502_at	-1.69797	-0.696717	-12.3664	1.00117e-09	9.89956e-06	12.5667	SAMHD1	25939
209642_at	-3.86453	-1.41784	-12.3282	1.04834e-09	1.01455e-05	12.5235	BUB1	699
228617_at	-2.74456	-1.24754	-12.1407	1.31628e-09	1.1926e-05	12.3098	XAF1	54739
238447_at	-2.1634	-0.827797	-12.1396	1.31805e-09	1.1926e-05	12.3085	RBMS3	27303
232596_at	-2.46271	-0.8926	-12.1265	1.33923e-09	1.1926e-05	12.2935	DIAPH3	81624
204279_at	-1.98568	-0.628694	-12.1017	1.38046e-09	1.1926e-05	12.265	PSMB9	5698
AFFX-HUMISGF3A/M97935_3_at	-1.58283	-0.725392	-12.0893	1.40166e-09	1.1926e-05	12.2506	STAT1	6772
228653_at	1.48142	0.702923	12.0887	1.40269e-09	1.1926e-05	12.25	SAMD5	389432
230570_at	-1.15216	-0.358193	-12.0811	1.41587e-09	1.1926e-05	12.2412	EIF3H	8667
202446_s_at	-1.43782	-0.60103	-11.9814	1.60062e-09	1.30196e-05	12.1256	PLSCR1	5359
228607_at	-1.70927	-0.709312	-11.9802	1.60295e-09	1.30196e-05	12.1242	OAS2	4939
235964_x_at	-1.58116	-0.54102	-11.9307	1.70412e-09	1.35986e-05	12.0665	SAMHD1	25939
201292_at	-4.30879	-1.51996	-11.9158	1.73582e-09	1.36127e-05	12.0491	TOP2A	7153
206767_at	-1.66294	-0.623605	-11.9009	1.76839e-09	1.36331e-05	12.0316	RBMS3	27303
234987_at	-1.9929	-0.690947	-11.7616	2.10389e-09	1.59492e-05	11.8674	SAMHD1	25939
201118_at	1.57477	0.729309	11.7439	2.15112e-09	1.60399e-05	11.8464	PGD	5226
217678_at	2.59286	1.57455	11.625	2.49874e-09	1.82908e-05	11.7046	SLC7A11	23657
229097_at	-2.4177	-1.0315	-11.6141	2.53342e-09	1.82908e-05	11.6915	DIAPH3	81624
238780_s_at	-1.1877	0.244204	-11.5682	2.68494e-09	1.89102e-05	11.6365	KCNJ5	3762
209921_at	2.55465	1.56538	11.5552	2.72972e-09	1.89102e-05	11.6208	SLC7A11	23657
200887_s_at	-1.52737	-0.68939	-11.5412	2.77868e-09	1.89102e-05	11.6039	STAT1	6772
1554097_a_at	2.16321	0.763956	11.5393	2.78551e-09	1.89102e-05	11.6016	MIR31HG
201616_s_at	-1.62989	-0.865631	-11.5045	2.91187e-09	1.92365e-05	11.5595	CALD1	800
227609_at	-2.43289	-1.29872	-11.495	2.9473e-09	1.92365e-05	11.548	EPSTI1	94240
219926_at	1.68283	0.638504	11.4915	2.96045e-09	1.92365e-05	11.5438	POPDC3	64208
234986_at	1.77906	0.915364	11.4691	3.04643e-09	1.95164e-05	11.5166	GCLM	2730
219855_at	-1.06053	-0.126665	-11.4443	3.14478e-09	1.98666e-05	11.4864	NUDT11	55190
235529_x_at	-1.47893	-0.51228	-11.3407	3.59275e-09	2.23857e-05	11.3598	SAMHD1	25939
202923_s_at	1.34541	0.582341	11.3282	3.65117e-09	2.24423e-05	11.3444	GCLC	2729
201617_x_at	-1.66988	-0.933718	-11.2701	3.936e-09	2.38013e-05	11.2729	CALD1	800
218542_at	-3.7122	-1.50546	-11.2547	4.01529e-09	2.38013e-05	11.2539	CEP55	55165
242775_at	3.45453	1.19238	11.252	4.02925e-09	2.38013e-05	11.2506
202086_at	-2.44556	-1.15783	-11.2054	4.28087e-09	2.48781e-05	11.1929	MX1	4599
201291_s_at	-4.53031	-1.54735	-11.1983	4.32094e-09	2.48781e-05	11.184	TOP2A	7153
225834_at	-3.47427	-1.15416	-11.0937	4.95412e-09	2.81672e-05	11.0535	FAM72C, FAM72A, FAM72B, FAM72D	554282, 728833, 729533, 653820
203744_at	-1.24959	-0.648338	-11.0575	5.19552e-09	2.9175e-05	11.0081	HMGB3	3149
235609_at	-2.36392	-0.930251	-10.917	6.25594e-09	3.47013e-05	10.8305	BRIP1	83990
240353_s_at	-1.54469	-0.588362	-10.8849	6.52892e-09	3.57791e-05	10.7896	C12orf54	121273
203755_at	-3.77398	-1.21197	-10.8463	6.87415e-09	3.72226e-05	10.7402	BUB1B	701
203418_at	-3.48083	-1.26439	-10.8258	7.06444e-09	3.78029e-05	10.7141	CCNA2	890
219148_at	-3.8107	-1.49594	-10.7821	7.4909e-09	3.96189e-05	10.6579	PBK	55872
201843_s_at	-1.96193	-0.553509	-10.7534	7.78539e-09	4.07032e-05	10.6209	EFEMP1	2202
226936_at	-2.29123	-1.03066	-10.7276	8.06041e-09	4.16621e-05	10.5876	CENPW	387103
1552701_a_at	-1.68085	-0.684666	-10.7153	8.19512e-09	4.18224e-05	10.5717	CARD16	114769
204646_at	-1.78135	-0.361555	-10.708	8.27532e-09	4.18224e-05	10.5624	DPYD	1806
211122_s_at	-3.48487	-1.62402	-10.6946	8.42719e-09	4.21219e-05	10.5449	CXCL11	6373
209969_s_at	-1.64102	-0.796219	-10.6282	9.21884e-09	4.52284e-05	10.4587	STAT1	6772
202954_at	-3.25954	-1.114	-10.6147	9.39001e-09	4.52284e-05	10.441	UBE2C	11065
202430_s_at	-1.3021	-0.57746	-10.6133	9.40692e-09	4.52284e-05	10.4393	PLSCR1	5359
242873_at	-2.1526	-0.731878	-10.6102	9.44644e-09	4.52284e-05	10.4352
204059_s_at	0.942461	0.460561	10.5897	9.7137e-09	4.60236e-05	10.4084	ME1	4199
236140_at	1.79187	0.738027	10.578	9.86963e-09	4.62802e-05	10.3931	GCLM	2730
228825_at	2.98472	1.15652	10.5687	9.99567e-09	4.6393e-05	10.3809	PTGR1	22949
209417_s_at	-1.72166	-0.858322	-10.506	1.08892e-08	4.98045e-05	10.2986	IFI35	3430
215646_s_at	-2.8967	-0.204348	-10.5019	1.09497e-08	4.98045e-05	10.2932	VCAN	1462
205433_at	-2.04352	-0.439346	-10.4734	1.13866e-08	5.12789e-05	10.2556	BCHE	590
225540_at	1.27799	0.332838	10.4462	1.18191e-08	5.27047e-05	10.2197	MAP2	4133
219918_s_at	-3.93091	-1.59877	-10.4327	1.20417e-08	5.27688e-05	10.2017	ASPM	259266
212665_at	1.13395	0.493502	10.4312	1.20655e-08	5.27688e-05	10.1998	TIPARP	25976
213017_at	1.58319	0.598038	10.3985	1.26212e-08	5.46736e-05	10.1564	ABHD3	171586
227566_at	-2.17907	-0.486749	-10.3242	1.39878e-08	6.00219e-05	10.0573	NTM	50863
204822_at	-3.41438	-1.39749	-10.315	1.41679e-08	6.02266e-05	10.045	TTK	7272
208955_at	-1.76306	-0.496827	-10.2757	1.49613e-08	6.27089e-05	9.99243	DUT	1854
204533_at	-3.68767	-1.74399	-10.2726	1.50276e-08	6.27089e-05	9.98817	CXCL10	3627
205483_s_at	-2.20657	-1.07962	-10.262	1.52508e-08	6.30619e-05	9.97393	ISG15	9636
223381_at	-3.66248	-1.17533	-10.2206	1.61557e-08	6.62017e-05	9.91829	NUF2	83540
213226_at	-2.79178	-0.999177	-10.1545	1.77236e-08	7.1978e-05	9.82881	CCNA2	890
219306_at	-2.53815	-0.994059	-10.1234	1.85163e-08	7.4532e-05	9.78651	KIF15	56992
209709_s_at	-3.40399	-1.17544	-10.094	1.92991e-08	7.70016e-05	9.74647	HMMR	3161
225252_at	1.65829	0.808149	10.0284	2.11732e-08	8.35577e-05	9.6568	, SRXN1	140809
209875_s_at	5.59162	1.36278	10.0239	2.13097e-08	8.35577e-05	9.65058	SPP1	6696
201615_x_at	-1.36326	-0.77833	-10.0069	2.18291e-08	8.48626e-05	9.62727	CALD1	800
204033_at	-2.71111	-0.968102	-9.95955	2.33484e-08	8.99998e-05	9.56211	TRIP13	9319
219684_at	-2.24421	-0.725112	-9.937	2.41108e-08	9.16232e-05	9.53098	RTP4	64108
201387_s_at	1.266	0.521247	9.92531	2.45163e-08	9.16232e-05	9.51481	UCHL1	7345
218943_s_at	-1.59122	-0.712172	-9.92419	2.45556e-08	9.16232e-05	9.51326	DDX58	23586
205749_at	4.41232	2.62489	9.92363	2.45753e-08	9.16232e-05	9.51248	CYP1A1	1543
202269_x_at	-2.59831	-1.45863	-9.90626	2.51929e-08	9.31622e-05	9.48843	GBP1, GBP1P1	2633, 400759
226541_at	1.19456	0.425864	9.85516	2.71058e-08	9.83565e-05	9.41746	FBXO30	84085
204352_at	-1.03508	-0.00511749	-9.85232	2.72164e-08	9.83565e-05	9.41351	TRAF5	7188
214710_s_at	-2.86123	-0.982788	-9.85156	2.72463e-08	9.83565e-05	9.41245	CCNB1	891
220295_x_at	-3.24662	-1.00889	-9.8427	2.75951e-08	9.87596e-05	9.40011	DEPDC1	55635
222793_at	-1.86373	-0.697642	-9.83774	2.77922e-08	9.87596e-05	9.39321	DDX58	23586
209821_at	-3.37143	-0.437452	-9.82644	2.82475e-08	9.95995e-05	9.37744	IL33	90865
1555854_at	3.52049	2.28227	9.80516	2.91261e-08	0.00010165	9.34772	AKR1C1, AKR1C2	1645, 1646
207828_s_at	-3.30354	-1.19119	-9.80159	2.92761e-08	0.00010165	9.34273	CENPF	1063
209891_at	-3.38588	-1.20253	-9.709	3.3469e-08	0.000115328	9.21276	SPC25	57405
202870_s_at	-3.86398	-1.20217	-9.69471	3.41707e-08	0.000116861	9.1926	CDC20	991
242037_at	1.21212	0.515993	9.68525	3.46435e-08	0.000117593	9.17925	ASPH	444
225710_at	-1.07289	-0.628511	-9.66204	3.58327e-08	0.000120729	9.14644	GNB4	59345
221436_s_at	-2.53286	-0.825846	-9.62138	3.80211e-08	0.000127161	9.0888	CDCA3	83461
227763_at	-1.34954	-0.0954835	-9.60124	3.91568e-08	0.000130003	9.06018	LYPD6	130574
236641_at	-2.86005	-0.698539	-9.57805	4.05087e-08	0.000133517	9.02716	KIF14	9928
222958_s_at	-3.54943	-1.30382	-9.53403	4.32115e-08	0.000140416	8.96429	DEPDC1	55635
214022_s_at	-1.7771	-0.649911	-9.53391	4.32192e-08	0.000140416	8.96412	IFITM1, IFITM2	8519, 10581
206364_at	-2.77175	-0.719012	-9.51492	4.44432e-08	0.000143368	8.93693	KIF14	9928
202555_s_at	-3.02658	-1.49262	-9.48602	4.63765e-08	0.000148551	8.89546	MYLK	4638
225541_at	-1.54369	-0.313816	-9.46577	4.77837e-08	0.000151988	8.86635	RPL22L1	200916
202705_at	-3.04659	-1.11291	-9.4597	4.8214e-08	0.000152292	8.85761	CCNB2	9133
201601_x_at	-1.9372	-0.69815	-9.4464	4.91715e-08	0.000154246	8.83845	IFITM1	8519
210559_s_at	-3.5843	-1.32512	-9.42027	5.11111e-08	0.000159232	8.80075	CDK1	983
212077_at	-1.073	-0.585667	-9.38549	5.38189e-08	0.000165841	8.75042	CALD1	800
204058_at	0.947862	0.384213	9.38152	5.41373e-08	0.000165841	8.74467	ME1	4199
229450_at	-3.18124	-1.6798	-9.3782	5.44058e-08	0.000165841	8.73984	IFIT3	3437
202800_at	-1.95267	-0.554357	-9.37468	5.46911e-08	0.000165841	8.73474	SLC1A3	6507
204641_at	-3.76394	-1.38282	-9.32438	5.89485e-08	0.000177218	8.66162	NEK2	4751
207165_at	-3.48913	-1.31305	-9.32127	5.92222e-08	0.000177218	8.6571	HMMR	3161
203214_x_at	-3.29505	-1.18375	-9.30197	6.09558e-08	0.000181213	8.62895	CDK1	983
228729_at	-3.28587	-1.01201	-9.28392	6.26247e-08	0.000184966	8.60258	CCNB1	891
241789_at	-1.60733	-0.592182	-9.26611	6.43181e-08	0.000188742	8.57654	RBMS3	27303
228273_at	-2.2057	-0.771332	-9.24799	6.60914e-08	0.000192702	8.54998	PRR11	55771
AFFX-HUMISGF3A/M97935_5_at	-1.31126	-0.695932	-9.23409	6.74859e-08	0.000195504	8.52959	STAT1	6772
228323_at	-3.02658	-1.12625	-9.2299	6.79121e-08	0.000195504	8.52344	CASC5	57082
228728_at	-1.54469	-0.381787	-9.20608	7.03912e-08	0.000201367	8.48842	CPED1	79974
218355_at	-3.08542	-1.06089	-9.2018	7.0847e-08	0.000201404	8.48211	KIF4A	24137
224823_at	-3.16258	-1.58721	-9.1945	7.16301e-08	0.000202366	8.47137	MYLK	4638
243041_s_at	-1.81692	-0.678917	-9.18314	7.28685e-08	0.000204593	8.45462
222608_s_at	-3.30242	-1.6027	-9.15904	7.55701e-08	0.000210877	8.41905	ANLN	54443
218726_at	-2.56384	-0.927531	-9.13933	7.78568e-08	0.000215933	8.3899	HJURP	55355
212355_at	0.933633	0.0104069	9.13054	7.89002e-08	0.000217501	8.37689	KHNYN	23351
1555758_a_at	-2.885	-1.01057	-9.12515	7.95483e-08	0.000217966	8.36889	CDKN3	1033
48106_at	1.21741	0.232859	9.11637	8.06135e-08	0.000219562	8.35588	SLC48A1	55652
202094_at	-2.94141	-0.900007	-9.10581	8.19161e-08	0.000221782	8.34021	BIRC5	332
219209_at	-1.42251	-0.568912	-9.10074	8.25488e-08	0.000222173	8.33268	IFIH1	64135
1554408_a_at	-2.35468	-0.658405	-9.03655	9.10211e-08	0.000243534	8.2371	TK1	7083
221577_x_at	2.11548	0.571661	9.0208	9.32367e-08	0.000248003	8.21356	GDF15	9518
219493_at	-3.49792	-1.3362	-9.01416	9.41878e-08	0.000249077	8.20363	SHCBP1	79801
235545_at	-3.1317	-0.950898	-8.9827	9.88326e-08	0.000258967	8.1565	DEPDC1	55635
204162_at	-3.54495	-1.28706	-8.98116	9.90667e-08	0.000258967	8.15418	NDC80	10403
237329_at	-1.30274	-0.27665	-8.9741	1.00144e-07	0.000260288	8.14359	RBMS3-AS3
206133_at	-2.90105	-1.24033	-8.95239	1.03536e-07	0.000267576	8.11096	XAF1	54739
204492_at	-1.79085	-0.462466	-8.94815	1.04213e-07	0.000267588	8.10458	ARHGAP11A	9824
200737_at	-0.86238	-0.425834	-8.94041	1.05461e-07	0.000267588	8.09293	PGK1	5230
222020_s_at	-2.27076	-0.47408	-8.93891	1.05704e-07	0.000267588	8.09067	NTM	50863
204318_s_at	-2.9374	-0.916878	-8.93437	1.06444e-07	0.000267588	8.08383	GTSE1	51512
204962_s_at	-3.05342	-1.13403	-8.93413	1.06483e-07	0.000267588	8.08348	CENPA	1058
210347_s_at	-1.04531	-0.150151	-8.90294	1.11722e-07	0.000279211	8.03642	BCL11A	53335
210052_s_at	-2.29918	-0.825847	-8.81792	1.2742e-07	0.000315022	7.90752	TPX2	22974
205393_s_at	-1.63327	-0.535099	-8.81784	1.27436e-07	0.000315022	7.90739	CHEK1	1111
231577_s_at	-2.46282	-1.45828	-8.79323	1.32401e-07	0.000325526	7.8699	GBP1	2633
223437_at	0.723242	0.578918	8.78338	1.34445e-07	0.000328774	7.85488	PPARA	5465
239825_at	1.75724	0.328829	8.76672	1.37976e-07	0.000335606	7.82943
1552619_a_at	-3.37741	-1.51262	-8.74298	1.43178e-07	0.000346406	7.79312	ANLN	54443
220049_s_at	-1.19645	-0.51397	-8.72206	1.47935e-07	0.000356022	7.76103	PDCD1LG2	80380
204435_at	1.21021	0.423109	8.65941	1.63191e-07	0.00039067	7.66465	NUP58	9818
209714_s_at	-2.67252	-0.943745	-8.60971	1.76466e-07	0.000420237	7.58781	CDKN3	1033
212022_s_at	-2.56872	-0.716438	-8.60451	1.77919e-07	0.00042149	7.57976	MKI67	4288
229823_at	-1.34525	-0.307776	-8.59151	1.81604e-07	0.000427992	7.55961	RIMS2	9699
201035_s_at	-1.46191	-0.633017	-8.58617	1.83143e-07	0.000429393	7.55131	HADH	3033
1555996_s_at	-1.12302	-0.441835	-8.57409	1.86672e-07	0.000435424	7.53255	EIF4A2, SNORA4, SNORA63	1974, 100302143, 619568
223220_s_at	-1.61273	-0.759502	-8.56296	1.89986e-07	0.000438538	7.51525	PARP9	83666
227357_at	1.07347	0.476952	8.55857	1.91312e-07	0.000438538	7.50841	TAB3	257397
207827_x_at	-0.932229	-0.1395	-8.5577	1.91576e-07	0.000438538	7.50706	SNCA	6622
207469_s_at	1.85645	1.02941	8.55675	1.91864e-07	0.000438538	7.50558	PIR	8544
225183_at	1.0447	0.473754	8.55053	1.93761e-07	0.00044066	7.4959	C16orf72	29035
204803_s_at	2.04906	0.922252	8.542	1.96397e-07	0.000443327	7.48262	RRAD	6236
224093_at	-2.54041	-0.760102	-8.54044	1.96883e-07	0.000443327	7.48019	IFNK	56832
205046_at	-2.36682	-0.852349	-8.52129	2.02955e-07	0.000452671	7.45031	CENPE	1062
227807_at	-1.37089	-0.620428	-8.52108	2.03024e-07	0.000452671	7.44998	PARP9	83666
202922_at	1.16566	0.507205	8.51253	2.058e-07	0.000456623	7.43663	GCLC	2729
204211_x_at	-0.82531	-0.381812	-8.49189	2.12661e-07	0.000469555	7.40436	EIF2AK2	5610
209172_s_at	-2.47123	-0.618423	-8.48611	2.14627e-07	0.000471607	7.39531	CENPF	1063
211804_s_at	-1.12319	-0.296737	-8.48211	2.15998e-07	0.000472338	7.38905	CDK2	1017
212203_x_at	-0.782488	-0.327551	-8.45447	2.25723e-07	0.000491244	7.34571	IFITM3	10410
232278_s_at	-3.5218	-1.23978	-8.44314	2.29845e-07	0.000497831	7.3279	DEPDC1,	55635
223570_at	-1.79359	-0.572573	-8.43876	2.31459e-07	0.00049895	7.32101	MCM10	55388
219211_at	-1.3522	-0.610932	-8.4026	2.45239e-07	0.000525943	7.26408	, USP18	11274
213253_at	-1.39564	-0.516425	-8.39993	2.46293e-07	0.000525943	7.25986	SMC2	10592
204802_at	1.75926	0.829757	8.35872	2.63129e-07	0.000558937	7.19474	RRAD	6236
211569_s_at	-1.81025	-0.760072	-8.35619	2.64201e-07	0.000558937	7.19074	HADH	3033
221534_at	1.0751	0.459329	8.33987	2.71227e-07	0.000571068	7.16488	C11orf68	83638
209464_at	-2.84161	-0.950121	-8.33708	2.72446e-07	0.000571068	7.16046	AURKB	9212
226980_at	-2.12158	-0.58296	-8.33048	2.7536e-07	0.000573615	7.14998	DEPDC1B	55789
1553293_at	-1.191	-0.830425	-8.3265	2.77129e-07	0.000573615	7.14368	MRGPRX3	117195
209408_at	-2.79765	-1.00921	-8.32398	2.78259e-07	0.000573615	7.13966	KIF2C	11004
218009_s_at	-2.61187	-0.848501	-8.32298	2.78706e-07	0.000573615	7.13809	PRC1	9055
203213_at	-3.46201	-1.29757	-8.29447	2.91826e-07	0.000597912	7.09276	CDK1	983
203554_x_at	-1.4943	-0.292515	-8.28856	2.94624e-07	0.000599472	7.08335	PTTG1	9232
204920_at	-1.31527	-0.366951	-8.28731	2.95223e-07	0.000599472	7.08135	CPS1	1373
203626_s_at	-1.83617	-0.650509	-8.25566	3.10736e-07	0.000628168	7.03087	SKP2	6502
239675_at	1.26316	0.457079	8.24744	3.14902e-07	0.000633773	7.01774	LINC00900
215716_s_at	0.887274	0.301506	8.22774	3.25129e-07	0.000651473	6.98623	ATP2B1	490
221731_x_at	-3.11519	-0.180803	-8.21778	3.30428e-07	0.000659187	6.97028	VCAN	1462
204709_s_at	-2.63149	-1.18011	-8.19728	3.4163e-07	0.000678559	6.9374	KIF23	9493
202502_at	-0.83998	-0.301191	-8.19175	3.44721e-07	0.000681721	6.92852	ACADM	34
217933_s_at	-1.0411	-0.616394	-8.18318	3.49564e-07	0.000688305	6.91476	LAP3	51056
218417_s_at	1.41166	0.287927	8.17871	3.52118e-07	0.000690346	6.90757	SLC48A1	55652
208084_at	-1.48527	-0.505332	-8.16704	3.58886e-07	0.000700595	6.88879	ITGB6	3694, 100505984
223307_at	-2.24551	-0.921351	-8.14495	3.72064e-07	0.000723216	6.85321	CDCA3	83461
204747_at	-2.38179	-1.05045	-8.13444	3.78506e-07	0.000732484	6.83627	IFIT3	3437
227777_at	-0.90304	-0.046761	-8.13195	3.80053e-07	0.000732484	6.83225
227165_at	-1.82001	-0.436673	-8.12687	3.83228e-07	0.000735488	6.82404	SKA3	221150
216565_x_at	-0.874344	-0.370041	-8.12352	3.85334e-07	0.000736422	6.81863
218039_at	-2.73105	-0.731938	-8.1102	3.93832e-07	0.000749513	6.7971	NUSAP1	51203
1554768_a_at	-2.64377	-0.806599	-8.10552	3.9686e-07	0.000752129	6.78954	MAD2L1,	4085
207183_at	-1.0647	-0.183446	-8.08708	4.09044e-07	0.000772005	6.75969	GPR19	2842
227295_at	-1.04125	-0.126721	-8.0789	4.14577e-07	0.000779214	6.74642	IKBIP	121457
229908_s_at	1.29205	0.384201	8.05881	4.28492e-07	0.000802053	6.71383	UNKL	64718
235457_at	-1.18414	-0.264772	-8.0476	4.36471e-07	0.000813639	6.69561	MAML2	84441
219978_s_at	-2.72538	-0.731895	-8.00865	4.65421e-07	0.000864065	6.63218	NUSAP1	51203
232238_at	-2.36306	-0.837255	-7.98092	4.87256e-07	0.000900926	6.58688	ASPM	259266
226978_at	0.828721	0.56236	7.96713	4.98506e-07	0.000915911	6.56433	PPARA	5465
201688_s_at	-0.780624	-0.334726	-7.96606	4.99388e-07	0.000915911	6.56258	TPD52	7163
208079_s_at	-2.16241	-0.822835	-7.9018	5.55633e-07	0.00101497	6.45709	AURKA	6790
204620_s_at	-2.99433	-0.147269	-7.8947	5.6224e-07	0.00102294	6.4454	VCAN	1462
208083_s_at	-1.69069	-0.590251	-7.87862	5.77515e-07	0.00104654	6.4189	ITGB6	3694, 100505984
244324_at	-1.00901	-0.272896	-7.87113	5.8478e-07	0.0010555	6.40653	C18orf54	162681
232151_at	-2.41075	-0.875222	-7.86074	5.95015e-07	0.00106973	6.38937	MACC1	346389
205499_at	-0.846256	-0.132535	-7.85115	6.04619e-07	0.0010787	6.37354	SRPX2	27286
208964_s_at	1.78982	1.05398	7.85103	6.04746e-07	0.0010787	6.37333	FADS1	3992, 100302263
200783_s_at	-1.3998	-0.379737	-7.80819	6.49716e-07	0.00115438	6.30238	STMN1	3925, 100500808
238623_at	1.4498	0.329241	7.80339	6.54964e-07	0.00115918	6.29442
213112_s_at	2.12349	0.988059	7.78798	6.72127e-07	0.00118477	6.26882	SQSTM1	8878
220786_s_at	-2.10193	-0.315058	-7.77384	6.88298e-07	0.00120412	6.24529	SLC38A4	55089
229352_at	-1.14388	0.0563726	-7.76342	7.00466e-07	0.00122071	6.22795	SPESP1	246777
205394_at	-1.53915	-0.467684	-7.75852	7.06261e-07	0.00122611	6.2198	CHEK1	1111
204070_at	-1.11057	-0.544689	-7.75138	7.14808e-07	0.00123563	6.20789	RARRES3	5920
1555847_a_at	1.37035	0.352932	7.74942	7.17176e-07	0.00123563	6.20462	MIR24-2	284454, 407013
230165_at	-2.02449	-0.718804	-7.70361	7.74814e-07	0.0013249	6.12809	SGO2	151246
203798_s_at	-2.69786	-0.946414	-7.70125	7.77919e-07	0.00132523	6.12413	VSNL1	7447
213906_at	-1.88018	-0.540502	-7.69463	7.86676e-07	0.00133514	6.11305	MYBL1	4603
216548_x_at	-0.893359	-0.621157	-7.69231	7.89776e-07	0.00133542	6.10915	HMGB3P1
208368_s_at	-1.59074	-0.633044	-7.68763	7.96046e-07	0.00133603	6.10132	BRCA2	675
201762_s_at	-0.719045	-0.428566	-7.68707	7.96812e-07	0.00133603	6.10037	PSME2P2, PSME2,	5721, 102465801
1554466_a_at	-0.674028	-0.159588	-7.68549	7.98947e-07	0.00133603	6.09772	C16orf13	84326
202747_s_at	-1.21693	-0.431562	-7.677	8.10508e-07	0.0013468	6.08349	ITM2A	9452
208146_s_at	-1.60122	-0.478839	-7.67642	8.1131e-07	0.0013468	6.08251	CPVL	54504
206011_at	-1.14353	-0.280783	-7.67212	8.17247e-07	0.00135172	6.07529	CASP1	834
221258_s_at	-2.45599	-0.779747	-7.65947	8.34962e-07	0.00137602	6.05405	KIF18A	81930
209785_s_at	1.3173	0.363995	7.652	8.45606e-07	0.00138564	6.04151	PLA2G4C	8605
226384_at	0.822725	0.3926	7.65009	8.48354e-07	0.00138564	6.03829	PLPP5	84513
213820_s_at	-1.10824	-0.54126	-7.64899	8.49938e-07	0.00138564	6.03645	STARD5	80765
225414_at	0.76471	0.399076	7.64494	8.55807e-07	0.00139022	6.02963	RNF149	284996
210334_x_at	-2.19729	-0.718214	-7.64032	8.62545e-07	0.0013949	6.02186	BIRC5	332
1563445_x_at	1.00609	0.286563	7.63878	8.64817e-07	0.0013949	6.01926	CTSLP8
214696_at	2.2131	0.237933	7.63406	8.71773e-07	0.00139914	6.01132	MIR22HG	84981, 407004
210944_s_at	-0.924724	-0.393416	-7.63283	8.73599e-07	0.00139914	6.00925	CAPN3,	825
206553_at	-1.23604	-0.621977	-7.62405	8.86741e-07	0.0014152	5.99446
202270_at	-2.38826	-1.4977	-7.61259	9.04202e-07	0.00143802	5.97514	GBP1	2633
204315_s_at	-2.49925	-0.674858	-7.60889	9.09914e-07	0.00144207	5.9689	GTSE1	51512
218741_at	-1.69356	-0.468291	-7.59422	9.32948e-07	0.00146894	5.94413	CENPM	79019
220403_s_at	-2.48123	-0.380258	-7.59389	9.33472e-07	0.00146894	5.94357	TP53AIP1	63970
226701_at	-2.57108	-1.43379	-7.59196	9.36559e-07	0.00146894	5.9403	GJA5	2702
212922_s_at	-0.771166	-0.324602	-7.5779	9.59298e-07	0.00149943	5.91653	SMYD2	56950
210416_s_at	-0.91512	-0.198176	-7.56855	9.74732e-07	0.00151434	5.90071	CHEK2	11200
213187_x_at	0.592951	0.227784	7.56703	9.77267e-07	0.00151434	5.89813	, FTL, FTLP3	2512
204444_at	-2.53084	-0.826937	-7.5661	9.78825e-07	0.00151434	5.89656	KIF11	3832
217835_x_at	0.833027	0.265872	7.56114	9.87161e-07	0.00151699	5.88815	C20orf24, TGIF2-C20orf24	55969, 100527943
1568592_at	-1.2347	-0.479173	-7.5587	9.91285e-07	0.00151699	5.88402	TRIM69	140691
241396_at	0.961656	0.300221	7.55779	9.92832e-07	0.00151699	5.88247	NEDD4L	23327
218349_s_at	-1.47935	-0.706855	-7.55717	9.93877e-07	0.00151699	5.88143	ZWILCH	55055
1555278_a_at	-0.656703	-0.170654	-7.5533	1.00049e-06	0.00152197	5.87486	CKAP5	9793
216860_s_at	-0.987379	-0.206764	-7.55062	1.00508e-06	0.00152386	5.87032	GDF11	10220
214340_at	0.703036	0.138137	7.54441	1.01581e-06	0.00153232	5.85979	ALOX12P2	245
214051_at	-1.20175	-0.443387	-7.5435	1.0174e-06	0.00153232	5.85825	TMSB15B,	286527
202274_at	-1.98976	-1.19012	-7.53484	1.0326e-06	0.00154585	5.84355	ACTG2	72
228152_s_at	-1.25935	-0.675258	-7.53298	1.03589e-06	0.00154585	5.84039	DDX60L	91351
228069_at	-1.98532	-0.868109	-7.53259	1.03658e-06	0.00154585	5.83973	MTFR2	113115
230606_at	0.95661	0.133872	7.51144	1.07487e-06	0.00159252	5.80377
1552649_a_at	1.05404	0.357714	7.50903	1.07932e-06	0.00159391	5.79968	, RFFL	117584
214106_s_at	-0.752592	-0.265599	-7.50588	1.08517e-06	0.00159737	5.79431	GMDS	2762
218663_at	-2.83619	-1.09309	-7.4967	1.10242e-06	0.00161753	5.77867	NCAPG	64151
238015_at	-1.43481	-0.337435	-7.49416	1.10723e-06	0.00161936	5.77436	C4orf46	201725
223880_x_at	0.888823	0.274943	7.48714	1.12068e-06	0.00163378	5.76239	C20orf24, TGIF2-C20orf24	55969, 100527943
203038_at	-0.952304	-0.375228	-7.47462	1.14508e-06	0.00166401	5.74103	PTPRK	5796
211546_x_at	-1.00256	-0.208518	-7.46666	1.16086e-06	0.00168142	5.72745	SNCA	6622
244030_at	-0.860741	-0.422829	-7.46487	1.16445e-06	0.00168142	5.72439	STYX	6815
218662_s_at	-2.96891	-1.14076	-7.45381	1.18686e-06	0.00170767	5.70549	NCAPG	64151
203991_s_at	-1.17687	-0.412696	-7.4517	1.19118e-06	0.00170767	5.70189	KDM6A	7403
203083_at	-1.77739	-0.0181223	-7.45038	1.19389e-06	0.00170767	5.69963	THBS2	7058
223700_at	-2.91567	-0.804227	-7.4327	1.23086e-06	0.00175503	5.66938	MND1	84057
210015_s_at	1.78601	0.550903	7.42285	1.25199e-06	0.00177959	5.65249	MAP2	4133
229041_s_at	1.0595	0.0405415	7.41865	1.26112e-06	0.00178615	5.64529	ITGB2-AS1	100505746
201476_s_at	-1.22791	-0.41678	-7.41711	1.26446e-06	0.00178615	5.64266	RRM1	6240
241916_at	-0.98326	-0.426853	-7.40808	1.28436e-06	0.00180863	5.62718
208754_s_at	-0.724533	-0.132766	-7.40501	1.2912e-06	0.00181265	5.62191	NAP1L1	4673
218797_s_at	0.77505	0.223772	7.40077	1.30071e-06	0.00182038	5.61463	SIRT7	51547
213927_at	1.61644	0.466237	7.39433	1.3153e-06	0.00183516	5.60356	MAP3K9	4293
231772_x_at	-1.76428	-0.497543	-7.38618	1.334e-06	0.00185023	5.58955	CENPH	64946
209040_s_at	-1.03515	-0.376827	-7.38607	1.33424e-06	0.00185023	5.58937	PSMB8	5696
223734_at	-1.20767	-0.443693	-7.37774	1.35364e-06	0.00187143	5.57505	MGARP	84709
1568812_at	0.998327	0.726719	7.35123	1.41738e-06	0.00195362	5.52938		100507140
202746_at	-1.09511	-0.266601	-7.34938	1.42195e-06	0.00195399	5.52619	ITM2A	9452
202087_s_at	0.91606	0.424599	7.34489	1.43309e-06	0.00196337	5.51844	CTSL	1514
202712_s_at	-0.984287	-0.344989	-7.34153	1.44147e-06	0.00196892	5.51265	CKMT1A, CKMT1B	548596, 1159
230110_at	-0.819051	-0.202696	-7.33442	1.45942e-06	0.00198747	5.50038	MCOLN2	255231
220651_s_at	-2.43847	-0.848398	-7.32288	1.48901e-06	0.00201883	5.48045	MCM10	55388
240354_at	-0.890776	-0.128574	-7.32199	1.49132e-06	0.00201883	5.47891
1555326_a_at	-0.654214	-0.235235	-7.29793	1.5552e-06	0.00209285	5.43727	ADAM9	8754
226353_at	0.761229	0.100033	7.29396	1.56601e-06	0.00210117	5.4304	SPPL2A	84888
1561723_at	0.725746	0.131905	7.28593	1.58811e-06	0.00212168	5.41648		105374177
218400_at	-1.95445	-0.690412	-7.28502	1.59062e-06	0.00212168	5.41491	OAS3	4940
227420_at	-0.893666	-0.055624	-7.28206	1.59888e-06	0.00212646	5.40977	TNFAIP8L1	126282
201036_s_at	-1.6309	-0.717485	-7.27724	1.61239e-06	0.00213817	5.40142	HADH	3033
218802_at	-1.02042	-0.561273	-7.27338	1.62331e-06	0.0021464	5.39472	CCDC109B	55013
242127_at	-1.50184	-0.173434	-7.263	1.65304e-06	0.00217937	5.3767
204146_at	-2.26634	-1.07657	-7.259	1.66463e-06	0.00218831	5.36976	RAD51AP1	10635
203999_at	-2.0788	-0.255682	-7.2557	1.67427e-06	0.00218981	5.36402	SYT1	6857
205240_at	-0.899842	-0.209787	-7.25532	1.6754e-06	0.00218981	5.36335	GPSM2	29899
1552680_a_at	-2.58733	-0.869257	-7.25117	1.6876e-06	0.00219943	5.35615	CASC5	57082
201288_at	-1.39173	-0.772865	-7.24746	1.69862e-06	0.00220534	5.34969	ARHGDIB	397
202842_s_at	1.02031	0.374393	7.24638	1.70183e-06	0.00220534	5.34781	DNAJB9	4189
232611_at	0.984387	0.27328	7.24151	1.71639e-06	0.00221385	5.33935	GOLGA2P5	55592
205339_at	-1.64869	-0.432331	-7.24094	1.71813e-06	0.00221385	5.33834	STIL	6491
205073_at	-1.01988	-0.152898	-7.23866	1.72501e-06	0.00221643	5.33438	CYP2J2	1573
202351_at	-0.591772	-0.161151	-7.23647	1.73165e-06	0.00221869	5.33056	ITGAV	3685
1554696_s_at	-1.73416	-0.652328	-7.23327	1.74138e-06	0.0022249	5.32499	TYMS	7298
240419_at	-1.42409	-0.292915	-7.22983	1.7519e-06	0.00223207	5.31901	SLC6A15	55117
202503_s_at	-2.77852	-0.968806	-7.22711	1.7603e-06	0.0022337	5.31426	KIAA0101	9768
201662_s_at	0.771725	0.486753	7.22623	1.763e-06	0.0022337	5.31274	ACSL3	2181
231033_at	1.46833	0.537786	7.19563	1.86032e-06	0.00234829	5.25937	DSC2	1824
226452_at	-1.35651	-0.680925	-7.19458	1.86377e-06	0.00234829	5.25753	PDK1	5163
217640_x_at	-1.99274	-0.805532	-7.18198	1.90555e-06	0.0023943	5.2355	SKA1	220134
204970_s_at	1.31139	0.636121	7.16807	1.95279e-06	0.0024469	5.21117	MAFG	4097
219000_s_at	-1.9653	-0.748648	-7.1623	1.97273e-06	0.0024651	5.20108	DSCC1	79075
206245_s_at	-1.48885	-0.556841	-7.13759	2.06066e-06	0.00256791	5.15775	IVNS1ABP	10625
215294_s_at	-1.01716	-0.038975	-7.13282	2.0781e-06	0.00258256	5.14938	SMARCA1	6594
221520_s_at	-1.59018	-0.540184	-7.13117	2.08416e-06	0.00258305	5.14648	CDCA8	55143
1554539_a_at	1.31076	0.800537	7.12339	2.11302e-06	0.00261169	5.13282	RHOF	54509
213007_at	-1.83479	-0.455178	-7.12097	2.12208e-06	0.00261578	5.12856	FANCI	55215
212949_at	-1.98867	-0.852199	-7.10553	2.18085e-06	0.00268097	5.10141	NCAPH	23397
225847_at	1.00245	0.31185	7.09763	2.21157e-06	0.00270308	5.08751	NCEH1	57552
203967_at	-1.98582	-0.665495	-7.09705	2.21386e-06	0.00270308	5.08648	CDC6	990
230664_at	-0.988937	-0.150514	-7.09633	2.21667e-06	0.00270308	5.08522
204821_at	-1.46943	-0.367785	-7.09287	2.23032e-06	0.00271245	5.07912	BTN3A3	10384
227928_at	-1.66219	-0.721555	-7.08468	2.26291e-06	0.00274071	5.0647	PARPBP	55010
202748_at	-1.63164	-0.804269	-7.08401	2.2656e-06	0.00274071	5.06352	GBP2	2634
231618_s_at	1.88857	0.667897	7.07729	2.29275e-06	0.00276619	5.05168	SUN3	256979
222848_at	-1.99304	-0.696093	-7.07569	2.29928e-06	0.00276673	5.04885	CENPK	64105
1554462_a_at	1.15305	0.362812	7.06278	2.35258e-06	0.0028234	5.02607	DNAJB9	4189
202242_at	1.91626	0.995392	7.05544	2.38348e-06	0.00285296	5.0131	, TSPAN7	7102
238569_at	0.937417	-0.14023	7.04315	2.43613e-06	0.0029007	4.99138	GABBR1	2550
230171_at	1.01782	0.0509615	7.02744	2.50522e-06	0.00297518	4.96357		105377348
215942_s_at	-1.71003	-0.465936	-7.00889	2.5894e-06	0.00306423	4.93071	GTSE1	51512
201897_s_at	-1.56237	-0.438334	-7.00627	2.60156e-06	0.00306423	4.92605	, CKS1B, CKS1BP3	1163
202696_at	0.636876	0.2703	7.00506	2.60715e-06	0.00306423	4.92392	OXSR1	9943
229490_s_at	-1.80742	-0.586926	-6.98657	2.69467e-06	0.00315894	4.89108
229578_at	-1.01545	-0.37724	-6.98208	2.71635e-06	0.00316803	4.88311	JPH2	57158
226333_at	1.88813	0.895796	6.98208	2.71636e-06	0.00316803	4.88311	IL6R	3570
226907_at	-0.772285	-0.358267	-6.97619	2.74509e-06	0.0031914	4.87265	PPP1R14C	81706
204237_at	1.42698	0.734821	6.97387	2.75653e-06	0.0031914	4.86851	GULP1	51454
228892_at	-1.16294	-0.478203	-6.96351	2.80807e-06	0.00323353	4.85009	SH3RF2	153769
221922_at	-1.01542	-0.143724	-6.95085	2.87246e-06	0.00329933	4.82753	GPSM2	29899
214804_at	-1.99622	-0.558964	-6.94374	2.9093e-06	0.00333323	4.81486	CENPI	2491
209122_at	1.50102	0.648669	6.9405	2.92625e-06	0.00334246	4.80908	PLIN2	123
218768_at	-0.967723	-0.332082	-6.93939	2.93206e-06	0.00334246	4.80711	NUP107	57122
212382_at	-1.25202	-0.369612	-6.92836	2.99065e-06	0.00339225	4.78742	TCF4	6925
238743_at	-1.19128	-0.353298	-6.92602	3.00324e-06	0.00339806	4.78324	EIF2AK2	5610
203180_at	1.58796	0.607405	6.92243	3.02263e-06	0.00340597	4.77684	ALDH1A3	220
201563_at	-0.834631	-0.343055	-6.92196	3.02521e-06	0.00340597	4.77599	SORD, SORD2P	6652
228172_at	-0.987612	-0.421618	-6.91286	3.07504e-06	0.00344431	4.75974
239897_at	-0.766113	-0.300767	-6.91174	3.08124e-06	0.00344431	4.75774	BCLAF1	9774
1556429_a_at	-1.10404	-0.30271	-6.9116	3.08198e-06	0.00344431	4.7575	TBC1D31	93594
225439_at	-0.58858	-0.341657	-6.90994	3.09123e-06	0.00344618	4.75452	NUDCD1	84955
217356_s_at	-0.6566	-0.354754	-6.89054	3.20098e-06	0.00355223	4.71981	PGK1	5230
203460_s_at	0.660821	0.0969091	6.89036	3.20198e-06	0.00355223	4.7195	PSEN1	5663
233251_at	0.594482	0.238306	6.86783	3.33458e-06	0.0036659	4.67912
201315_x_at	-0.78551	-0.353377	-6.8667	3.3414e-06	0.0036659	4.67709	IFITM2	10581
1557218_s_at	-1.13059	-0.226364	-6.86023	3.3806e-06	0.0036963	4.66548	FANCB	2187
217721_at	-0.796688	-0.326614	-6.85816	3.39327e-06	0.00370126	4.66176	SEPT7	989
1556332_at	1.06055	0.542432	6.85673	3.40204e-06	0.00370195	4.65919
202891_at	0.857698	0.0835805	6.85232	3.42922e-06	0.00371886	4.65127	NIT1	4817
224376_s_at	0.84966	0.288601	6.85117	3.43633e-06	0.00371886	4.64921	C20orf24, TGIF2-C20orf24	55969, 100527943
238831_at	-0.829888	-0.138531	-6.85024	3.44212e-06	0.00371886	4.64753	TMEM33	55161
210567_s_at	-1.94232	-1.01194	-6.84526	3.47317e-06	0.00374352	4.6386	SKP2	6502
218371_s_at	1.14531	0.436813	6.84143	3.49727e-06	0.00376059	4.63172	PSPC1	55269
204092_s_at	-2.10537	-0.733584	-6.83978	3.50774e-06	0.00376294	4.62874	AURKA	6790
223394_at	1.36952	0.0926323	6.8364	3.52922e-06	0.00377708	4.62267	SERTAD1	29950
201471_s_at	1.67796	0.690449	6.82852	3.57982e-06	0.00381575	4.6085	SQSTM1	8878
203821_at	1.97758	1.11261	6.82817	3.58213e-06	0.00381575	4.60786	HBEGF	1839
221729_at	-2.30296	-0.652729	-6.82553	3.59922e-06	0.003825	4.60312	COL5A2	1290
224701_at	-0.998906	-0.478557	-6.8232	3.61444e-06	0.00383222	4.59892	PARP14	54625
227068_at	-0.785994	-0.479689	-6.82168	3.62436e-06	0.0038338	4.59619	PGK1	5230
244514_at	-0.863961	-0.186763	-6.818	3.64857e-06	0.00384606	4.58956	IPO11	51194
228373_at	0.837976	0.399632	6.80117	3.76152e-06	0.00394222	4.55922	C16orf72	29035
223487_x_at	-0.760009	-0.565875	-6.79794	3.7836e-06	0.00395624	4.55339	GNB4	59345
202534_x_at	-1.79048	-0.84002	-6.77966	3.91108e-06	0.00407171	4.52041	DHFR	1719
209773_s_at	-3.39971	-1.44263	-6.77841	3.91999e-06	0.00407171	4.51814	RRM2	6241
217810_x_at	-0.937707	-0.0549642	-6.77828	3.92089e-06	0.00407171	4.51791	LARS	51520
204727_at	-1.54347	-0.452816	-6.77206	3.96543e-06	0.00410859	4.50667	WDHD1	11169
236279_at	0.718888	0.187182	6.76939	3.98467e-06	0.00411913	4.50185
242961_x_at	-1.22027	-0.494769	-6.76711	4.00123e-06	0.00412688	4.49772	DDX58	23586
206500_s_at	-1.1458	-0.27959	-6.76437	4.02118e-06	0.00413105	4.49277	MIS18BP1	55320
206522_at	-1.71491	-0.38424	-6.7635	4.02755e-06	0.00413105	4.49119	MGAM	8972
228665_at	-1.28491	-0.264955	-6.76282	4.03252e-06	0.00413105	4.48997	CYYR1	116159
218995_s_at	-1.25171	-0.89302	-6.74623	4.15604e-06	0.00422901	4.45993	EDN1	1906
205167_s_at	-2.00107	-0.659103	-6.73902	4.2109e-06	0.00426575	4.44687	CDC25C	995
36711_at	1.58614	0.581162	6.72622	4.31021e-06	0.00435665	4.42366	MAFF	23764
202843_at	1.29553	0.390786	6.72041	4.35607e-06	0.00439079	4.41313	DNAJB9	4189
236769_at	0.958292	0.681149	6.71937	4.36438e-06	0.00439079	4.41123
221521_s_at	-1.65665	-0.621641	-6.71829	4.37295e-06	0.00439079	4.40927	GINS2	51659
1566766_a_at	-2.20011	-0.709777	-6.70207	4.50426e-06	0.00450276	4.37981	MACC1	346389
230193_at	-0.718314	-0.131425	-6.69846	4.53407e-06	0.00451142	4.37325	WDR66	144406
210735_s_at	-1.0421	-0.0368266	-6.69838	4.53469e-06	0.00451142	4.37311	CA12	771
212021_s_at	-2.28766	-0.747161	-6.69703	4.54587e-06	0.00451142	4.37066	MKI67	4288
216228_s_at	-1.4062	-0.589887	-6.69598	4.55465e-06	0.00451142	4.36874	WDHD1	11169
210163_at	-2.05719	-0.650415	-6.6862	4.6367e-06	0.00456878	4.35096
204235_s_at	1.27657	0.713869	6.68574	4.64062e-06	0.00456878	4.35012	GULP1	51454
209929_s_at	0.736455	0.13001	6.67817	4.70529e-06	0.00462245	4.33633	IKBKGP1, IKBKG	8517
228597_at	-1.20497	-0.437962	-6.67281	4.75162e-06	0.0046579	4.32658	MIS18A	54069
238075_at	-1.26705	-0.276643	-6.67137	4.76418e-06	0.00466017	4.32395	CHEK1	1111
212023_s_at	-2.17264	-0.866891	-6.66246	4.84252e-06	0.00471652	4.3077	MKI67	4288
205733_at	-1.868	-0.708755	-6.66098	4.85561e-06	0.00471916	4.30501	BLM	641
239217_x_at	0.688615	0.305399	6.65975	4.86657e-06	0.00471973	4.30277	ABCC3	8714
210650_s_at	0.784686	0.0278434	6.65007	4.95367e-06	0.0047838	4.2851	PCLO	27445
218736_s_at	-2.83839	-1.12796	-6.64088	5.03777e-06	0.00484034	4.26833	PALMD	54873
213008_at	-1.57087	-0.474908	-6.64039	5.04236e-06	0.00484034	4.26742	FANCI	55215
202338_at	-1.53846	-0.547742	-6.64019	5.04414e-06	0.00484034	4.26707	TK1	7083
1555812_a_at	-1.46362	-0.664435	-6.63438	5.09824e-06	0.00488195	4.25645	ARHGDIB	397
203362_s_at	-2.54605	-0.966407	-6.62537	5.18322e-06	0.00494297	4.23998	MAD2L1	4085
204128_s_at	-1.82314	-0.669061	-6.62532	5.18369e-06	0.00494297	4.23989	RFC3	5983
201308_s_at	-1.12142	-0.463179	-6.62412	5.1951e-06	0.00494348	4.2377	SEPT11	55752
228846_at	2.15907	1.074	6.62282	5.20754e-06	0.00494497	4.23532	MXD1	4084
228281_at	-2.04776	-0.719798	-6.61739	5.2597e-06	0.00496951	4.22539	DDIAS	220042
230194_at	-0.920676	-0.144639	-6.61682	5.26527e-06	0.00496951	4.22434	LRPPRC	10128
205833_s_at	0.879356	0.082909	6.61603	5.27288e-06	0.00496951	4.2229	, PART1	25859
235425_at	-1.78443	-0.736304	-6.60626	5.36838e-06	0.00503463	4.20502	SGO2	151246
203234_at	1.51005	0.530141	6.60102	5.42036e-06	0.00506949	4.19542	UPP1	7378
201641_at	-1.40953	-0.589757	-6.60027	5.42784e-06	0.00506949	4.19405	BST2	684
201890_at	-2.76266	-1.41878	-6.59114	5.51982e-06	0.00513431	4.17731	RRM2	6241
208832_at	-0.76557	-0.397976	-6.58893	5.54229e-06	0.00513673	4.17326	ATXN10	25814
205739_x_at	-1.32568	-0.409448	-6.58795	5.55227e-06	0.00513673	4.17147	ZNF107	51427
226308_at	-0.964572	-0.0772062	-6.58744	5.55754e-06	0.00513673	4.17052	HAUS8	93323
205745_x_at	0.748486	0.298701	6.58298	5.60333e-06	0.00515924	4.16235	ADAM17	6868
222039_at	-1.79338	-0.950891	-6.57597	5.67616e-06	0.00521574	4.14948	KIF18B	146909
224829_at	1.25264	0.507955	6.55054	5.94875e-06	0.00543329	4.10275	CPEB4	80315
217938_s_at	0.611882	0.271507	6.54808	5.97586e-06	0.00544711	4.09822	KCMF1	56888
210118_s_at	0.686986	0.409566	6.54334	6.02839e-06	0.00548401	4.0895	IL1A	3552
210589_s_at	0.632579	-0.103468	6.53737	6.0952e-06	0.0055227	4.07851	GBAP1, GBA	2630, 2629
234863_x_at	-1.70681	-0.654555	-6.52752	6.20719e-06	0.00561299	4.06037	FBXO5	26271
201562_s_at	-0.842321	-0.310315	-6.51472	6.35598e-06	0.00572477	4.03677	SORD, SORD2P	6652
206482_at	0.850388	0.396029	6.5127	6.37978e-06	0.00573364	4.03305	PTK6	5753
206653_at	-1.07685	-0.495487	-6.51174	6.39104e-06	0.00573364	4.03129	POLR3G	10622
205623_at	1.48385	0.905299	6.50312	6.49394e-06	0.00580306	4.01537	ALDH3A1	218
201463_s_at	0.554552	0.211205	6.49706	6.56727e-06	0.00585708	4.00418	TALDO1	6888
214475_x_at	-1.04085	-0.316447	-6.4943	6.60099e-06	0.00586574	3.99908	CAPN3,	825
202780_at	-0.932009	-0.530905	-6.49415	6.60277e-06	0.00586574	3.99881	OXCT1	5019
212314_at	0.718242	0.235308	6.48277	6.74357e-06	0.00595592	3.97778	SEL1L3	23231
213599_at	-2.29869	-0.691943	-6.48139	6.76084e-06	0.00595961	3.97523	OIP5	11339
217682_at	0.901453	0.0613598	6.47582	6.83117e-06	0.00600995	3.96492	, C16orf72	29035
222606_at	-1.17519	-0.604046	-6.45739	7.06905e-06	0.00617149	3.9308	ZWILCH	55055
211762_s_at	-1.19833	-0.431223	-6.45393	7.11469e-06	0.00619943	3.92439	, KPNA2	146880, 3838
205633_s_at	0.719129	0.219111	6.4467	7.21095e-06	0.0062713	3.91099	ALAS1	211
237701_at	-0.768125	-0.175306	-6.44122	7.28491e-06	0.00632353	3.90082	C12orf54	121273
202600_s_at	1.17476	0.633027	6.43992	7.30243e-06	0.00632667	3.89843	NRIP1	8204
208963_x_at	1.53832	0.956298	6.43518	7.36716e-06	0.00637061	3.88963	FADS1	3992, 100302263
210039_s_at	-0.651137	-0.284886	-6.42611	7.49275e-06	0.00646692	3.87279	PRKCQ	5588
200924_s_at	1.4223	0.727656	6.4042	7.80516e-06	0.00670413	3.83207	SLC3A2	6520
223568_s_at	0.684686	0.160606	6.40264	7.82789e-06	0.00670413	3.82917	WHSC1L1, PLPP5	54904, 84513
225415_at	-1.03175	-0.411791	-6.40175	7.84093e-06	0.00670413	3.82751	DTX3L	151636
203968_s_at	-1.71043	-0.516534	-6.40041	7.8605e-06	0.00670413	3.82503	CDC6	990
219163_at	0.48813	0.0928009	6.39971	7.87076e-06	0.00670413	3.82372	ZNF562	54811
38037_at	2.07773	1.2147	6.39623	7.92216e-06	0.0067082	3.81724	HBEGF	1839
201014_s_at	-1.1361	-0.505834	-6.3958	7.92855e-06	0.0067082	3.81643	PAICS, PAICSP4	10606
217202_s_at	-0.796754	-0.450188	-6.39539	7.93454e-06	0.0067082	3.81568	, GLULP4, SBF2, GLUL	81846, 2752
212789_at	-1.30952	-0.320409	-6.387	8.05995e-06	0.00680158	3.80005	NCAPD3	23310
1554594_at	1.15956	-0.00549127	6.37137	8.29886e-06	0.00697731	3.77093	ARHGAP27	201176
210788_s_at	0.561217	0.212995	6.36869	8.3406e-06	0.0069926	3.76592	DHRS7	51635
218581_at	0.769912	0.318864	6.36823	8.34779e-06	0.0069926	3.76507	ABHD4	63874
201738_at	0.713608	0.331766	6.36539	8.39221e-06	0.00701688	3.75978	EIF1B	10289
204240_s_at	-1.24272	-0.520525	-6.35189	8.60705e-06	0.00713097	3.73457	SMC2	10592
1552370_at	-1.13871	-0.654325	-6.34908	8.65247e-06	0.00715557	3.72933	C4orf33	132321
208643_s_at	-0.707843	-0.312452	-6.33974	8.8053e-06	0.00725557	3.71187	XRCC5	7520
209118_s_at	-1.10502	-0.70728	-6.33816	8.83139e-06	0.00726391	3.70892	TUBA1A	7846
48808_at	-1.69425	-0.727735	-6.32838	8.99494e-06	0.00737177	3.69063	DHFR	1719
205909_at	-1.77253	-0.757689	-6.32702	9.0179e-06	0.0073773	3.68808	POLE2	5427
229610_at	-2.31438	-0.801519	-6.32434	9.06327e-06	0.0074011	3.68308	CKAP2L	150468
228736_at	0.912423	0.377038	6.31748	9.18074e-06	0.0074702	3.67024	HELQ	113510
222808_at	0.635702	-0.0732847	6.31639	9.19965e-06	0.00747223	3.66819	ALG13	79868
209824_s_at	1.03102	0.452836	6.31163	9.28222e-06	0.00751897	3.65928	ARNTL	406
202188_at	-0.76587	-0.295409	-6.31117	9.29027e-06	0.00751897	3.65842	NUP93	9688
225295_at	-0.560696	-0.0879242	-6.27914	9.86718e-06	0.00794349	3.59834	SLC39A10	57181
219502_at	-2.08248	-0.628939	-6.27097	1.00202e-05	0.00805239	3.583	NEIL3	55247
225007_at	-0.807148	-0.260333	-6.26994	1.00396e-05	0.00805377	3.58107	G3BP1	10146
239331_at	1.36	0.603579	6.2656	1.01222e-05	0.00810574	3.5729
203797_at	-2.17691	-0.730342	-6.26338	1.01646e-05	0.00812538	3.56873	VSNL1	7447
226858_at	1.29018	0.534977	6.26116	1.02071e-05	0.00814506	3.56457	CSNK1E	1454, 102800317
230847_at	0.715519	0.349928	6.24128	1.05974e-05	0.00841584	3.52715
213393_at	0.929281	0.424064	6.24105	1.06019e-05	0.00841584	3.52672	MFSD9	84804
202284_s_at	0.755176	0.247873	6.20102	1.14355e-05	0.00898347	3.45124	CDKN1A	1026
226834_at	1.20513	1.5612	6.18642	1.17564e-05	0.00920789	3.42364	CLMP	79827
1552766_at	-0.860316	0.116049	-6.15969	1.23681e-05	0.00958365	3.37305	HS6ST2	90161
227070_at	-1.2493	-0.182066	-6.15173	1.25566e-05	0.00966386	3.35797	GLT8D2	83468
204835_at	-1.24976	-0.511643	-6.1487	1.26291e-05	0.00968686	3.35222	POLA1	5422
223422_s_at	-0.958768	-0.318527	-6.14358	1.27526e-05	0.00975701	3.34252	ARHGAP24	83478
222725_s_at	-2.04927	-0.54611	-6.14313	1.27634e-05	0.00975701	3.34167	PALMD	54873
227904_at	0.639508	-0.0607254	6.14199	1.27912e-05	0.00976186	3.3395	AZI2	64343
202266_at	0.812353	0.310032	6.13879	1.28693e-05	0.00980499	3.33343	TDP2	51567
230490_x_at	-0.811903	-0.369471	-6.13156	1.30474e-05	0.00989098	3.31972	RSU1	6251
225240_s_at	-0.895353	-0.127723	-6.12884	1.31152e-05	0.00991741	3.31455	MSI2	124540
211080_s_at	-2.02593	-0.776322	-6.12841	1.31259e-05	0.00991741	3.31374	NEK2	4751
204887_s_at	-1.94574	-0.792048	-6.12618	1.31818e-05	0.00994316	3.3095	PLK4	10733
209281_s_at	0.597538	0.307665	6.11914	1.33598e-05	0.0100275	3.29612	ATP2B1	490
211042_x_at	-1.37327	-0.691113	-6.11518	1.34608e-05	0.0100867	3.28861	SKP2	6502
242560_at	-1.56903	-0.656202	-6.11019	1.35896e-05	0.0101665	3.27911	FANCD2	2177
222434_at	-1.01142	-0.0262238	-6.09947	1.387e-05	0.0103422	3.25873	ENAH	55740
227521_at	0.633619	0.2297	6.09264	1.40519e-05	0.0104436	3.24574	FBXO33	254170
204948_s_at	-1.34582	-0.599869	-6.09051	1.41092e-05	0.0104691	3.24168	FST	10468
235830_at	-0.806394	-0.321733	-6.08719	1.4199e-05	0.0105185	3.23535	NT5DC1	221294
218014_at	-0.629762	-0.268608	-6.08213	1.43368e-05	0.0106034	3.22572	NUP85	79902
218871_x_at	0.878652	0.481176	6.07992	1.43975e-05	0.010631	3.2215	CSGALNACT2	55454
227981_at	0.681116	-0.104711	6.07674	1.44851e-05	0.010661	3.21545	CYB561D1	284613
221685_s_at	-1.09009	-0.492152	-6.07094	1.46466e-05	0.0107451	3.20439	SPDL1	54908
46270_at	0.774907	0.302254	6.06482	1.48191e-05	0.0108367	3.19271	UBAP1	51271
227931_at	0.536286	0.382127	6.06081	1.4933e-05	0.0108964	3.18507	INO80D	54891
223556_at	-1.65397	-0.507966	-6.06027	1.49486e-05	0.0108964	3.18403	HELLS	3070
223125_s_at	-0.678556	-0.19518	-6.05525	1.50929e-05	0.0109839	3.17445	C1orf21	81563
49485_at	0.549877	0.230184	6.05406	1.51273e-05	0.010984	3.17217	PRDM4	11108
225904_at	-0.989803	-0.295994	-6.05357	1.51413e-05	0.010984	3.17125	CCSAP	126731
201631_s_at	0.734298	0.430595	6.04711	1.53297e-05	0.0110513	3.15891	IER3	8870
225237_s_at	-0.939598	-0.0944968	-6.04504	1.53906e-05	0.0110765	3.15496	MSI2	124540
38241_at	-1.61087	-0.318711	-6.03686	1.56337e-05	0.011216	3.13932	BTN3A3	10384
1556538_at	0.57055	0.05151	6.01816	1.62044e-05	0.0115165	3.10356	MELTF	4241
220885_s_at	-1.08777	-0.293621	-6.01731	1.62309e-05	0.0115173	3.10193	CENPJ	55835
219650_at	-1.42275	-0.529247	-6.00908	1.64892e-05	0.0116672	3.08618	ERCC6L	54821
204886_at	-1.80534	-0.745752	-6.00668	1.65654e-05	0.0116818	3.08158	PLK4	10733
216559_x_at	-0.602706	-0.292819	-5.99413	1.69696e-05	0.0119114	3.05753	HNRNPA1P3
208921_s_at	-0.504671	-0.249298	-5.98641	1.7223e-05	0.0120689	3.04274	SRI	6717
1555292_at	0.817074	0.452569	5.98387	1.73075e-05	0.0120926	3.03786	STRIP2	57464
40446_at	0.871521	0.449783	5.98176	1.73779e-05	0.0121071	3.03381	PHF1	5252
202599_s_at	1.00749	0.506622	5.98165	1.73815e-05	0.0121071	3.0336	NRIP1	8204
210237_at	0.763662	0.384042	5.9777	1.75141e-05	0.0121808	3.02602	ARTN	9048
1557985_s_at	-0.759408	-0.189539	-5.96197	1.80524e-05	0.0124789	2.99582	CEP78	84131
215111_s_at	0.869304	0.359805	5.94755	1.85613e-05	0.0127531	2.96808	TSC22D1	8848
228115_at	1.00905	0.576252	5.94576	1.86253e-05	0.0127778	2.96465	GAREM1	64762
218308_at	-1.73551	-0.556579	-5.94082	1.88034e-05	0.0128035	2.95515	TACC3	10460
228914_at	0.938591	0.61058	5.93575	1.89885e-05	0.0128525	2.94538
204466_s_at	-1.18042	-0.175805	-5.93389	1.90568e-05	0.0128795	2.9418	SNCA	6622
207675_x_at	0.918755	0.360727	5.92596	1.93507e-05	0.0130588	2.92652	ARTN	9048
203874_s_at	-0.789172	-0.00659082	-5.92502	1.93856e-05	0.013063	2.92473	SMARCA1	6594
203145_at	-1.9901	-0.601214	-5.91224	1.98704e-05	0.0133098	2.90009	SPAG5	10615
226234_at	-0.860246	-0.0149999	-5.91006	1.99543e-05	0.0133098	2.89588	GDF11	10220
202606_s_at	0.670287	0.405765	5.90862	2.00097e-05	0.0133256	2.89311	TLK1	9874
204467_s_at	-1.38721	-0.218583	-5.90584	2.01177e-05	0.0133779	2.88775	SNCA	6622
226237_at	-1.39907	0.131811	-5.89737	2.04498e-05	0.0135394	2.87141	COL8A1	1295
203856_at	-1.28649	-0.615322	-5.89526	2.05337e-05	0.0135752	2.86732	VRK1	7443
226664_at	0.676138	0.306218	5.89121	2.0695e-05	0.0136421	2.85952	TBC1D20	128637
228037_at	0.847208	0.377646	5.89012	2.07388e-05	0.0136512	2.85741	RARA-AS1	101929693
228082_at	0.698077	0.760625	5.8842	2.09779e-05	0.0137688	2.84597	CLMP	79827
202589_at	-1.41041	-0.564224	-5.87904	2.11886e-05	0.013884	2.836	TYMS	7298
206102_at	-1.77298	-0.786634	-5.87841	2.12145e-05	0.013884	2.83478	GINS1	9837
203625_x_at	-1.55258	-0.76284	-5.87631	2.13009e-05	0.0139205	2.83072	SKP2	6502
226630_at	-1.1923	-0.29572	-5.86548	2.17527e-05	0.014175	2.80978	MIS18BP1	55320
206082_at	-1.37745	-0.657306	-5.86026	2.19741e-05	0.0142988	2.79968	HCP5	10866
228139_at	0.803931	0.0573929	5.85344	2.22667e-05	0.0143781	2.78648	RIPK3	11035
226446_at	0.601252	0.328408	5.85238	2.23125e-05	0.0143781	2.78443	HES6	55502
205407_at	-1.07252	-0.220809	-5.85191	2.23328e-05	0.0143781	2.78352	RECK	8434
237105_at	-0.632779	-0.275972	-5.85072	2.23847e-05	0.0143781	2.78121
209688_s_at	0.490638	0.250767	5.85044	2.23967e-05	0.0143781	2.78067	CCDC93	54520
201088_at	-0.930371	-0.376683	-5.84989	2.24208e-05	0.0143781	2.7796	, KPNA2	146880, 3838
225062_at	-0.579374	-0.286222	-5.84973	2.24277e-05	0.0143781	2.77929		389831, 102723360, 102724219, 102724441, 102724843, 102724951
200648_s_at	-0.779367	-0.447571	-5.84936	2.24436e-05	0.0143781	2.77859	GLUL	2752
226661_at	-1.75534	-0.596941	-5.82906	2.33463e-05	0.0148726	2.73924	CDCA2	157313
227375_at	0.665653	0.348671	5.82164	2.36854e-05	0.0150465	2.72485	ANKRD13C	81573
244417_at	0.488282	-0.0539613	5.81232	2.41188e-05	0.0152367	2.70676
226710_at	0.843463	0.481478	5.80741	2.43505e-05	0.0153192	2.69722	C8orf82	414919
1554538_at	0.769835	0.482573	5.80433	2.44968e-05	0.0153698	2.69125	RHOF	54509
225300_at	-0.950657	-0.459431	-5.79566	2.49138e-05	0.0156088	2.6744	KNSTRN	90417
1554256_a_at	0.685523	0.370873	5.78261	2.55559e-05	0.0159671	2.64901	PCNX2	80003
224320_s_at	-1.26157	-0.374165	-5.77904	2.57343e-05	0.0160565	2.64207	MCM8	84515
201058_s_at	-1.03329	-0.649576	-5.772	2.60903e-05	0.0162564	2.62836	MYL9	10398
204083_s_at	-1.02184	-0.288625	-5.76568	2.64142e-05	0.0164132	2.61605	TPM2	7169
226926_at	-0.537706	-0.223286	-5.76368	2.65171e-05	0.0164547	2.61217	DMKN	93099
218883_s_at	-1.25519	-0.706537	-5.76256	2.65754e-05	0.0164683	2.60999	CENPU	79682
1553114_a_at	0.703915	0.114505	5.75067	2.71999e-05	0.016764	2.58681	PTK6	5753
225291_at	-0.886182	-0.496855	-5.74931	2.72721e-05	0.0167857	2.58416	PNPT1	87178
204142_at	-0.604852	-0.317545	-5.74813	2.7335e-05	0.0167968	2.58187	ENOSF1	55556
230482_at	-0.935031	-0.377852	-5.74702	2.73946e-05	0.0167968	2.57969	ST6GALNAC5	81849
222748_s_at	0.884592	-0.220192	5.74504	2.75009e-05	0.0168355	2.57583	TXNL4B	54957
224428_s_at	-1.92852	-0.682924	-5.7408	2.77294e-05	0.0169418	2.56757	CDCA7	83879
219377_at	0.81176	0.43852	5.73951	2.77998e-05	0.0169418	2.56504	GAREM1	64762
229231_at	0.592498	0.275603	5.73866	2.78458e-05	0.0169418	2.56339	LRRC37BP1, LRRC37B	114659
206348_s_at	-0.564328	-0.317017	-5.73793	2.78857e-05	0.0169418	2.56196	PDK3	5165
229019_at	-0.72931	-0.290154	-5.7377	2.78981e-05	0.0169418	2.56152	ZNF385B	151126
228286_at	-1.03396	-0.560716	-5.73668	2.79541e-05	0.0169532	2.55952	GEN1	348654
226555_at	0.617602	0.415313	5.73315	2.81478e-05	0.0170453	2.55263	INO80D	54891
225752_at	0.782762	0.412345	5.72869	2.83943e-05	0.0171515	2.54393	NIPA1	123606
235065_at	1.04586	0.56734	5.72446	2.86301e-05	0.0172374	2.53568	GAREM1	64762
225639_at	-0.650129	-0.268501	-5.71897	2.89397e-05	0.0173657	2.52495	SKAP2	8935
204475_at	3.70316	1.81828	5.71522	2.91531e-05	0.0174477	2.51762	MMP1	4312
218809_at	0.570073	0.196381	5.71137	2.93738e-05	0.0175554	2.51009	PANK2	80025
204510_at	-1.33512	-0.344773	-5.69459	3.03561e-05	0.0179085	2.47727	CDC7	8317
205220_at	1.58749	0.597619	5.684	3.09932e-05	0.0182135	2.45655	HCAR3, HCAR2	8843, 338442
237323_at	1.01815	0.43688	5.67303	3.16683e-05	0.018467	2.43505	HKDC1	80201
201418_s_at	-0.836388	-0.365765	-5.67172	3.17494e-05	0.0184827	2.4325	SOX4	6659
219998_at	-0.888051	-0.48941	-5.66972	3.18749e-05	0.0184827	2.42856	LGALSL	29094
220134_x_at	0.525307	0.295488	5.66848	3.19521e-05	0.0184827	2.42615	EVA1B	55194
221618_s_at	-1.02943	-0.582517	-5.66683	3.20564e-05	0.0184827	2.4229	TAF9B	51616
216052_x_at	0.588022	0.34004	5.65303	3.29379e-05	0.0188449	2.39583	ARTN	9048
210594_x_at	0.721146	0.00895427	5.63705	3.39901e-05	0.0193738	2.36446	MPZL1	9019
202722_s_at	0.935141	0.464699	5.63539	3.4101e-05	0.0194127	2.36121	GFPT1	2673
232593_at	0.889646	0.444341	5.6272	3.46554e-05	0.0196057	2.34512	NEURL3	93082
207590_s_at	-1.24601	-0.510323	-5.62318	3.49312e-05	0.0197371	2.33721	CENPI	2491
213532_at	0.594643	0.298403	5.61704	3.53564e-05	0.0199081	2.32514	ADAM17	6868
222456_s_at	0.819121	0.244642	5.61684	3.53706e-05	0.0199081	2.32474	LIMA1	51474
208511_at	-0.958977	-0.260834	-5.61629	3.54089e-05	0.0199081	2.32366	PTTG3P	26255
218574_s_at	-1.0354	-0.441369	-5.61376	3.55861e-05	0.019983	2.31868	LMCD1	29995
223950_s_at	0.536866	0.388677	5.61258	3.56684e-05	0.0200046	2.31637	FLYWCH1	84256
219715_s_at	-0.786248	-0.191387	-5.61146	3.57474e-05	0.0200238	2.31417	TDP1	55775
204728_s_at	-1.12165	-0.436674	-5.61023	3.58347e-05	0.0200238	2.31173	WDHD1	11169
1553984_s_at	-0.856248	-0.30197	-5.59962	3.65921e-05	0.0203719	2.29086	DTYMK	1841
1554885_a_at	-0.727064	-0.347034	-5.59367	3.70247e-05	0.0205386	2.27914	PRIM2	5558
1554154_at	0.624986	0.266762	5.59364	3.7027e-05	0.0205386	2.27908	GDAP2	54834
235513_at	0.859694	0.692228	5.5876	3.74715e-05	0.0206592	2.26717
203209_at	-0.98444	-0.324579	-5.57702	3.82628e-05	0.0209684	2.24632	RFC5	5985
226275_at	1.24326	0.750317	5.57054	3.87564e-05	0.0211878	2.23354	MXD1	4084
209481_at	1.08698	0.609116	5.56325	3.93189e-05	0.0214299	2.21916	SNRK	54861
208897_s_at	-0.61821	-0.337231	-5.5603	3.9549e-05	0.021492	2.21334	DDX18	8886
201690_s_at	-0.594754	-0.264674	-5.54255	4.09637e-05	0.0221055	2.17828	TPD52	7163
219610_at	-0.505631	0.0828226	-5.54095	4.10935e-05	0.0221199	2.17512	ARHGEF28	64283
224935_at	-0.465413	-0.197968	-5.53968	4.11968e-05	0.0221493	2.17262	EIF2S3	1968
201614_s_at	-0.920574	-0.457806	-5.53757	4.13694e-05	0.0222158	2.16845	RUVBL1	8607
212667_at	-1.19416	-0.207278	-5.52987	4.20055e-05	0.0224514	2.15322	SPARC	6678
218624_s_at	0.524398	0.299601	5.52352	4.25384e-05	0.0226539	2.14065	CENPBD1P1,	65996
203882_at	-0.884885	-0.411204	-5.52298	4.25836e-05	0.0226539	2.13959	IRF9,	10379
204521_at	-1.57244	-0.377114	-5.5198	4.28533e-05	0.0227007	2.13329	FAM216A	29902
227259_at	-0.685611	-0.289862	-5.51959	4.28713e-05	0.0227007	2.13287	CD47	961
204026_s_at	-1.71729	-0.943645	-5.51409	4.33418e-05	0.0228375	2.12198	ZWINT	11130
217626_at	1.36026	1.02637	5.51364	4.33805e-05	0.0228375	2.12109	AKR1C1	1645
204143_s_at	-0.598596	-0.292972	-5.50961	4.37282e-05	0.0229673	2.11313	ENOSF1	55556
226016_at	-0.832411	-0.284532	-5.50849	4.38261e-05	0.0229834	2.1109	CD47	961
1555801_s_at	-1.16366	-0.628631	-5.50223	4.43743e-05	0.0231198	2.0985	ZNF385B	151126
219555_s_at	-1.37748	-0.30457	-5.49815	4.47349e-05	0.023281	2.09042	CENPN	55839
224918_x_at	0.707557	0.405545	5.48662	4.57723e-05	0.0237124	2.06756	MGST1	4257
219661_at	-0.863537	-0.437162	-5.47835	4.65309e-05	0.0239689	2.05116	RANBP17	64901
44783_s_at	1.38185	0.749005	5.47242	4.70831e-05	0.0241712	2.03939	HEY1	23462
242898_at	-0.697723	-0.357651	-5.46904	4.74006e-05	0.0243068	2.03269	EIF2AK2	5610
208962_s_at	1.80945	1.10586	5.46784	4.75139e-05	0.0243374	2.03031	FADS1	3992, 100302263
228879_at	-0.644005	-0.206909	-5.46192	4.80778e-05	0.0245433	2.01854	SNORD104
1559883_s_at	-1.51736	-0.637456	-5.45808	4.8446e-05	0.0247036	2.01093	SAMHD1	25939
1555841_at	0.724078	0.456311	5.45438	4.88049e-05	0.0248309	2.00357	MSANTD3	91283
226603_at	-1.23716	-0.795233	-5.45141	4.90948e-05	0.0249227	1.99766	SAMD9L	219285
221802_s_at	-0.508184	-0.266538	-5.45036	4.91976e-05	0.024947	1.99557	SHTN1	57698
219638_at	-0.986856	-0.536846	-5.44809	4.94203e-05	0.025032	1.99107	FBXO22	26263
201644_at	-0.550785	-0.314664	-5.44392	4.98327e-05	0.0252128	1.98278	TSTA3	7264
231406_at	0.58455	0.302025	5.44226	4.99976e-05	0.0252681	1.97948	ORAI2	80228
203641_s_at	-0.815979	-0.336349	-5.43297	5.09322e-05	0.0256811	1.96101	COBLL1	22837
1555058_a_at	0.65295	0.177397	5.43262	5.09685e-05	0.0256811	1.9603	LPGAT1	9926
235588_at	-1.19814	-0.67786	-5.43246	5.09842e-05	0.0256811	1.95999	ESCO2	157570
235088_at	-1.15203	-0.516817	-5.42906	5.13315e-05	0.0257645	1.95322	C4orf46	201725
217999_s_at	1.03078	0.744124	5.42877	5.13613e-05	0.0257645	1.95264	PHLDA1, NAP1L1	22822, 4673
216918_s_at	-1.20104	-0.398848	-5.42246	5.20125e-05	0.0259406	1.94008	DST	667
218875_s_at	-1.60754	-0.625493	-5.40933	5.33937e-05	0.0264266	1.91394	FBXO5	26271
209900_s_at	-0.534075	-0.0998125	-5.40544	5.38108e-05	0.0265752	1.90618	SLC16A1	6566
205945_at	1.91504	0.87067	5.39579	5.48583e-05	0.0268966	1.88695	IL6R	3570
216508_x_at	-0.859528	-0.42718	-5.39509	5.49347e-05	0.0268966	1.88556	HMGB1P4
201013_s_at	-1.00262	-0.447571	-5.39035	5.54581e-05	0.0270075	1.8761	PAICS	10606
219015_s_at	0.697404	-0.0142803	5.38785	5.57368e-05	0.0270726	1.8711	ALG13	79868
204023_at	-1.08294	-0.272983	-5.38723	5.58051e-05	0.0270726	1.86988	RFC4	5984
221703_at	-1.00587	-0.362411	-5.38634	5.59047e-05	0.0270726	1.8681	BRIP1	83990
201518_at	-0.521546	-0.21192	-5.38542	5.60083e-05	0.0270726	1.86626	CBX1	10951
238469_at	-0.628487	-0.371211	-5.38171	5.64248e-05	0.0272161	1.85887	OGFRL1	79627
219961_s_at	-0.49716	-0.152515	-5.37813	5.68308e-05	0.0273829	1.85172	KIZ	55857
222077_s_at	-1.0945	-0.349284	-5.36949	5.78223e-05	0.0276877	1.83447	RACGAP1	29127
36936_at	-0.50664	-0.340456	-5.36798	5.79978e-05	0.0277394	1.83145	TSTA3	7264
209217_s_at	0.548997	0.258189	5.36601	5.82265e-05	0.0277613	1.82752	WDR45	11152
225864_at	0.910018	0.506438	5.35295	5.97703e-05	0.0282897	1.80143	FAM84B	157638
203285_s_at	-0.747278	0.0567853	-5.35235	5.9843e-05	0.0282947	1.80021	HS2ST1	9653
203875_at	-0.745313	0.0448283	-5.35083	6.00251e-05	0.0283513	1.79718	SMARCA1	6594
222859_s_at	0.523254	0.190212	5.3462	6.05848e-05	0.0284973	1.78793	DAPP1	27071
202863_at	-1.15314	-0.546199	-5.34477	6.07593e-05	0.0285498	1.78506	SP100	6672
222028_at	0.594534	0.263738	5.33735	6.16708e-05	0.0288677	1.77021	ZNF45	7596
236640_at	0.517172	0.269567	5.33731	6.16748e-05	0.0288677	1.77015	MIR100HG	399959
219076_s_at	-0.775815	-0.299933	-5.33583	6.18594e-05	0.0288877	1.76717	, PXMP2	5827
1555330_at	0.789745	0.327114	5.32536	6.31727e-05	0.0294406	1.74622	GCLC	2729
226240_at	0.528756	0.256834	5.31531	6.44611e-05	0.029949	1.72609	TADA2B	93624
219544_at	-0.965129	-0.303152	-5.30345	6.6016e-05	0.0304392	1.70232	BORA	79866
210827_s_at	1.55421	0.716079	5.29951	6.65404e-05	0.0305177	1.69443	ELF3,	1999
225395_s_at	0.586941	-0.0434001	5.29798	6.67466e-05	0.0305433	1.69135	FAM120AOS	158293
207700_s_at	0.506015	0.218023	5.28649	6.83072e-05	0.0311317	1.6683	NCOA3	8202
224945_at	0.554575	0.297743	5.28516	6.84905e-05	0.0311528	1.66563	BTBD7	55727
204173_at	-0.609461	0.0312598	-5.28252	6.88544e-05	0.0311979	1.66035	MYL6B	140465
201858_s_at	-1.39613	-0.203555	-5.2823	6.88848e-05	0.0311979	1.65991	SRGN	5552
218418_s_at	0.796908	0.339101	5.27576	6.97987e-05	0.0314959	1.64677	KANK2	25959
205067_at	0.541805	0.485336	5.27143	7.04099e-05	0.0316774	1.63807	IL1B	3553
218585_s_at	-1.97831	-0.744117	-5.25848	7.22711e-05	0.0322278	1.61206	DTL	51514
219863_at	-1.25371	-0.56453	-5.25272	7.31166e-05	0.0324775	1.60047	HERC5	51191
225406_at	-0.420039	-0.0614658	-5.24771	7.38585e-05	0.0327112	1.5904	TWSG1	57045
227919_at	1.03802	0.258922	5.23566	7.56763e-05	0.0331931	1.56616	, UCA1	652995
200853_at	-0.604285	0.0405762	-5.23066	7.64446e-05	0.0333692	1.5561	H2AFZ	3015
206756_at	0.577891	0.371096	5.21976	7.81458e-05	0.0339489	1.53415	CHST7	56548
201272_at	0.613889	0.493682	5.21909	7.82517e-05	0.0339543	1.5328	AKR1B1	231
219494_at	-1.18129	-0.31602	-5.21848	7.83484e-05	0.0339543	1.53157	, RAD54B	25788
202053_s_at	0.722988	0.213341	5.21384	7.90877e-05	0.0341623	1.52221	ALDH3A2	224
203228_at	-0.5358	-0.126487	-5.21113	7.95217e-05	0.034295	1.51676	PAFAH1B3	5050
218214_at	0.569136	0.288793	5.21098	7.95456e-05	0.034295	1.51646	ATG101	60673
232172_at	0.753329	0.424796	5.20794	8.00355e-05	0.0344409	1.51034	CD99P1	401577
208753_s_at	-0.577511	0.0306685	-5.20463	8.05736e-05	0.0346397	1.50366	, NAP1L1	4673
223358_s_at	0.8331	0.526787	5.20102	8.11646e-05	0.0348608	1.49637	PDE7A	5150
230948_at	0.570778	0.311063	5.19745	8.17531e-05	0.0349814	1.48917
225679_at	0.411765	0.209897	5.19514	8.21358e-05	0.0351002	1.48452	NAA30	122830
212919_at	0.710585	0.391364	5.19484	8.2185e-05	0.0351002	1.48392	DCP2	167227
233907_s_at	-0.741517	-0.393587	-5.18811	8.33126e-05	0.0353825	1.47034	SERTAD4	56256
212501_at	0.919213	0.514673	5.18593	8.36818e-05	0.0353876	1.46593	CEBPB	1051
239787_at	-1.34475	-0.401221	-5.18574	8.37137e-05	0.0353876	1.46555	KCTD4	386618
226126_at	-0.890321	-0.44895	-5.18331	8.41261e-05	0.0354761	1.46065	TBCK	93627
218004_at	0.476076	0.177926	5.18294	8.41884e-05	0.0354761	1.45991	BSDC1	55108
213403_at	0.582399	0.725967	5.18028	8.46436e-05	0.0355344	1.45454	MFSD9	84804
204127_at	-1.74653	-0.875612	-5.17527	8.55065e-05	0.0358126	1.44443	RFC3	5983
227350_at	-1.41481	-0.350178	-5.17276	8.5944e-05	0.0359297	1.43935	HELLS	3070
217649_at	0.598928	0.318746	5.17146	8.61694e-05	0.0359908	1.43673
210200_at	0.541179	0.0129475	5.16964	8.64889e-05	0.0360911	1.43305	WWP2	11060
204106_at	0.731418	0.392854	5.16829	8.67261e-05	0.0361238	1.43032	TESK1	7016
230036_at	-1.39979	-0.908295	-5.16735	8.6891e-05	0.0361594	1.42842	SAMD9L	219285
235089_at	0.627482	0.321123	5.15906	8.83628e-05	0.0366378	1.41168	FBXL20	84961
204556_s_at	-0.962555	-0.102469	-5.1572	8.86966e-05	0.0366426	1.40793	DZIP1	22873
227488_at	-0.600961	-0.255837	-5.15541	8.90193e-05	0.0367425	1.40431	MIR503, MIR503HG	574506, 84848, 494336
213379_at	-0.66977	-0.313565	-5.15368	8.93337e-05	0.0368055	1.40079	COQ2	27235
227354_at	1.46518	0.696122	5.1478	9.04048e-05	0.0371123	1.38892	PAG1	55824
202350_s_at	-1.01885	-0.41739	-5.14225	9.1428e-05	0.0374648	1.3777	MATN2	4147
39402_at	0.524606	0.47092	5.13513	9.27596e-05	0.0378272	1.36329	IL1B	3553
232287_at	0.577051	-0.0389587	5.13282	9.31971e-05	0.0378733	1.3586	PGBD3, ERCC6	267004, 2074
232102_at	0.617588	0.248427	5.13168	9.34121e-05	0.0378733	1.35631	METTL6	131965
200965_s_at	0.550617	0.286762	5.12715	9.42765e-05	0.0381848	1.34713	ABLIM1	3983
1559477_s_at	-0.458609	-0.171677	-5.12316	9.50422e-05	0.0383126	1.33907	MEIS1	4211
228029_at	0.694263	0.298074	5.12288	9.50974e-05	0.0383126	1.33849	ZNF721	170960
229674_at	-0.860145	-0.505978	-5.11964	9.57253e-05	0.0384098	1.33193	SERTAD4	56256
206214_at	-0.942012	-0.336133	-5.11873	9.59029e-05	0.0384098	1.33008	PLA2G7	7941
218723_s_at	1.45971	1.1235	5.11792	9.60603e-05	0.0384282	1.32845	RGCC	28984
225310_at	-0.750212	-0.35388	-5.11621	9.63951e-05	0.038522	1.32498	RBMX	27316
203022_at	-1.0826	-0.596933	-5.10991	9.76379e-05	0.0388883	1.31222	RNASEH2A	10535
214938_x_at	-0.622942	-0.29734	-5.10934	9.77503e-05	0.038899	1.31107	HMGB1, , HMGB1P5	3146
206376_at	-0.604909	0.212194	-5.1075	9.81167e-05	0.0390107	1.30734	SLC6A15	55117
226267_at	-0.733193	0.0910263	-5.10579	9.84596e-05	0.0391128	1.30387	JDP2	122953
207345_at	-1.36619	-0.566934	-5.10387	9.88455e-05	0.0391977	1.29997	FST	10468
202582_s_at	0.610243	0.299962	5.0914	0.000101384	0.0399373	1.27471	RANBP9	10048
222752_s_at	0.560539	0.315786	5.09128	0.00010141	0.0399373	1.27445	TMEM206	55248
205763_s_at	-0.732277	-0.346813	-5.08547	0.000102617	0.0403067	1.26266	DDX18	8886
235643_at	-1.31992	-0.656159	-5.08388	0.000102949	0.0403406	1.25945	SAMD9L	219285
216574_s_at	-0.585505	-0.321386	-5.07117	0.000105649	0.040932	1.23366	RPEL1, RPE	729020, 6120
224589_at	-0.982661	-0.372494	-5.06778	0.000106382	0.0411459	1.22677	XIST	7503
227027_at	0.821775	0.596719	5.06367	0.000107277	0.0414218	1.21842	GFPT1	2673
212658_at	0.798758	0.526708	5.06114	0.000107831	0.0415231	1.21328	LHFPL2	10184
212923_s_at	0.647205	0.292262	5.0598	0.000108127	0.0415668	1.21056	PXDC1	221749
203545_at	-0.550762	-0.297603	-5.05587	0.000108997	0.0418372	1.20258	ALG8	79053
244133_at	0.532154	0.11425	5.05345	0.000109536	0.0420085	1.19766	USP49	25862
228641_at	-0.492181	-0.264973	-5.03985	0.00011262	0.0428466	1.17	CARD8	22900
210250_x_at	-0.521625	-0.275008	-5.03854	0.000112921	0.0429022	1.16734	ADSL	158
213716_s_at	0.703659	0.403925	5.03565	0.00011359	0.043091	1.16146	SECTM1	6398
1558906_a_at	0.715946	0.12747	5.03497	0.000113746	0.0431143	1.16009	OSER1-AS1	100505783
231736_x_at	0.785871	0.428733	5.03154	0.000114547	0.0432377	1.15311	MGST1	4257
208972_s_at	-0.662972	-0.332689	-5.02461	0.000116179	0.0436004	1.13902	ATP5G1	516
218756_s_at	-1.02974	-0.866679	-5.02352	0.000116439	0.0436622	1.13678	DHRS11	79154
244631_at	0.692253	0.0827917	5.0178	0.000117808	0.0439959	1.12514
1555383_a_at	-1.02514	-0.620005	-5.01706	0.000117986	0.0439981	1.12364	POF1B	79983
224761_at	0.533496	0.304396	5.01517	0.000118444	0.0440866	1.11979	GNA13	10672
227059_at	-0.721659	0.188742	-5.00815	0.000120154	0.0446503	1.1055	GPC6	10082
218365_s_at	-0.533818	-0.453043	-5.00759	0.000120292	0.0446541	1.10437	DARS2	55157
1565162_s_at	0.855397	0.41866	4.99755	0.000122789	0.0452315	1.0839	MGST1	4257
225687_at	-2.13216	-1.36738	-4.99266	0.000124023	0.0455301	1.07394	FAM83D	81610
203264_s_at	-0.652691	-0.267624	-4.98366	0.00012633	0.0460106	1.05559	ARHGEF9	23229
227752_at	-1.48023	-0.755716	-4.98013	0.000127247	0.0463023	1.04839	SPTLC3	55304
239170_at	-0.541287	-0.168241	-4.97911	0.000127513	0.0463622	1.04631	ACTR3	10096
224984_at	0.594175	0.48405	4.97616	0.000128286	0.0465315	1.0403	, NFAT5	10725
227814_at	0.579285	0.255263	4.97266	0.000129208	0.0467352	1.03316	WDR53	348793
202626_s_at	0.763981	0.328855	4.97247	0.000129258	0.0467352	1.03277	LYN	4067
201577_at	-0.633334	-0.346945	-4.96747	0.00013059	0.0471761	1.02256	NME1-NME2, NME1	654364, 4830
201920_at	1.2799	0.710191	4.96696	0.000130727	0.0471761	1.02152	SLC20A1	6574
229013_at	0.617839	-0.0274515	4.96572	0.000131059	0.0472361	1.019	ZNF280D	54816, 145783
221190_s_at	0.519971	0.250448	4.96238	0.000131959	0.0474853	1.01218	C18orf8	29919
218330_s_at	-1.18247	-0.643255	-4.95861	0.000132983	0.047727	1.00449	NAV2	89797
223418_x_at	0.623746	0.279335	4.95597	0.000133705	0.047924	0.999097	ANKRD13C	81573
234700_s_at	2.15416	0.538831	4.953	0.000134522	0.0480818	0.993031	RNASE7	84659
205227_at	-0.666133	-0.508304	-4.95257	0.000134641	0.0480818	0.992148	IL1RAP	3556
206363_at	-1.04821	-0.084542	-4.95245	0.000134674	0.0480818	0.991908	MAF	4094
200666_s_at	0.835015	0.303946	4.95096	0.000135087	0.0481538	0.988856	DNAJB1	3337
219045_at	1.36098	1.06003	4.94564	0.00013657	0.0485391	0.977988	RHOF	54509
204849_at	-0.579034	0.0469994	-4.94017	0.00013811	0.0490008	0.966827	TCFL5	10732
221942_s_at	-1.05646	-0.684509	-4.92968	0.000141117	0.0497572	0.945385	GUCY1A3	2982
1555724_s_at	-1.98115	-1.11344	-4.92893	0.000141335	0.0497954	0.943848	TAGLN	6876
201091_s_at	-0.474835	-0.142016	-4.92563	0.000142295	0.0499411	0.937107	CBX3	11335
225081_s_at	-1.00079	-0.170275	-4.92235	0.000143259	0.0501625	0.930387	CDCA7L	55536
240383_at	0.822759	0.557265	4.92192	0.000143384	0.0501678	0.929516	UBE2D3	7323
206495_s_at	0.564542	0.283253	4.91672	0.000144923	0.0505895	0.918889	HINFP	25988
220907_at	0.753613	0.133929	4.91029	0.000146852	0.0511929	0.905727	ADGRF1	266977
201061_s_at	-0.577297	0.093192	-4.91021	0.000146877	0.0511929	0.90556	STOM	2040
238084_at	0.659873	0.323865	4.90828	0.000147461	0.0512659	0.901612	PCGF3	10336
229295_at	0.779058	0.328205	4.90622	0.000148088	0.0514179	0.89739	IL17RA	23765
213293_s_at	-1.40337	-0.9426	-4.90452	0.000148604	0.0515578	0.893925	TRIM22	10346
229784_at	-0.777449	-0.41344	-4.89875	0.000150379	0.0520545	0.882106	MIR503HG	84848, 494336
208616_s_at	0.45161	0.251799	4.89578	0.0001513	0.0522937	0.876029	PTP4A2	8073
200047_s_at	0.428811	0.170831	4.89268	0.000152269	0.0525089	0.869677	YY1	7528, 102466730
205547_s_at	-2.12929	-1.12663	-4.88714	0.000154014	0.0529501	0.858336	TAGLN	6876
205031_at	-0.627261	0.211683	-4.88484	0.000154747	0.0531217	0.853612	EFNB3	1949
230571_at	0.605783	0.398459	4.88214	0.000155608	0.0533411	0.848089
213186_at	-0.82379	-0.668609	-4.88002	0.000156289	0.05353	0.843742	DZIP3	9666
211717_at	0.457275	0.101707	4.87357	0.000158378	0.0540825	0.83053	ANKRD40	91369
212206_s_at	-0.899173	-0.0693031	-4.86861	0.000160004	0.0544335	0.820363	H2AFV	94239
228587_at	0.712002	0.31219	4.86203	0.000162188	0.0549442	0.806871	FAM83G	644815
218651_s_at	0.817874	0.500377	4.86191	0.00016223	0.0549442	0.806616	LARP6	55323
202139_at	-0.583374	-0.327047	-4.85837	0.000163416	0.0552225	0.799368	AKR7A2	8574
208920_at	-0.979509	-0.621749	-4.85725	0.000163793	0.0553087	0.797076	SRI	6717
1560208_at	0.740079	0.08318	4.85621	0.000164145	0.0553455	0.794937
214661_s_at	-0.599642	-0.0315035	-4.85498	0.000164563	0.0554044	0.792405	NOP14	8602
224367_at	0.943688	0.62891	4.84157	0.000169176	0.056539	0.764899	BEX2	84707
210087_s_at	0.7835	-0.0298188	4.82561	0.000174842	0.0577117	0.732123	MPZL1	9019
1555465_at	-0.688861	-0.193195	-4.8227	0.000175895	0.0578492	0.726153	MCOLN2	255231
236458_at	0.594349	0.392413	4.82039	0.000176738	0.0580007	0.721396
226214_at	0.388085	0.26633	4.81152	0.000180003	0.0587331	0.703187	GDE1	51573
212635_at	0.53451	0.350047	4.80006	0.000184316	0.0596432	0.67963	TNPO1	3842
1558501_at	-0.60832	-0.103943	-4.79787	0.000185153	0.0597501	0.675128	DNM3	26052
210038_at	-0.604149	-0.313603	-4.79598	0.000185881	0.0599204	0.671223	PRKCQ	5588
202257_s_at	0.426191	-0.0656905	4.79135	0.000187668	0.0602827	0.661709	CD2BP2	10421
226142_at	-1.08281	-0.723226	-4.78414	0.000190489	0.0609736	0.646869	GLIPR1	11010
228721_at	-0.824683	-0.434903	-4.78327	0.000190831	0.0610401	0.645086	KRBOX1,	100506243
223878_at	0.764285	-0.0555251	4.78174	0.000191437	0.061191	0.641931	INPP4B	8821
234699_at	2.08124	0.454193	4.77899	0.000192527	0.0612881	0.636285	RNASE7	84659
221586_s_at	-0.512847	0.0841462	-4.77894	0.000192549	0.0612881	0.636169	E2F5	1875
1554010_at	0.784539	0.485107	4.7782	0.000192843	0.0613386	0.634655
204567_s_at	0.979609	1.03074	4.77668	0.000193449	0.0614885	0.631532	ABCG1	9619
233058_at	-0.790075	-0.0620301	-4.77361	0.000194682	0.0617078	0.625215	GPSM2	29899
204880_at	-0.614843	-0.344055	-4.76586	0.000197833	0.0625322	0.609249	MGMT	4255
222041_at	0.525423	-0.0761741	4.7642	0.000198513	0.0627036	0.605837	OVCA2, DPH1	124641, 1801
1553589_a_at	-1.25324	-0.511219	-4.76171	0.000199539	0.0629633	0.600711	PDZK1IP1	10158
203420_at	0.420847	0.132973	4.75266	0.000203315	0.0639541	0.582066	FAM8A1	51439
227124_at	0.474779	0.358568	4.75044	0.000204254	0.0641605	0.577488	SMIM13	221710
200664_s_at	0.820518	0.254019	4.745	0.000206568	0.0646643	0.566285	DNAJB1	3337
213558_at	0.698055	-0.0140879	4.73039	0.000212922	0.0661073	0.536164	PCLO	27445
222812_s_at	1.10767	0.795331	4.72487	0.000215375	0.0665682	0.524779	RHOF	54509
205525_at	-0.982465	-0.41643	-4.71685	0.00021899	0.0674388	0.508231	CALD1	800
208093_s_at	0.462763	0.291817	4.71463	0.000219998	0.0677035	0.503664	NDEL1	81565
230002_at	-0.764955	0.0153643	-4.71121	0.000221565	0.0679596	0.496609	GPSM2	29899
235232_at	0.454105	0.259623	4.71119	0.000221577	0.0679596	0.496553	GMEB1	10691
222734_at	-0.512807	-0.35369	-4.7012	0.000226219	0.0688262	0.475949	WARS2	10352
226886_at	0.8495	0.606925	4.69604	0.000228656	0.0694747	0.465299	GFPT1	2673
202487_s_at	-0.516606	-0.169062	-4.69459	0.000229345	0.0695595	0.462305	H2AFV,	94239
219735_s_at	0.452604	-0.0866578	4.69458	0.000229351	0.0695595	0.46228	TFCP2L1	29842
221927_s_at	0.415551	-0.0990709	4.69449	0.000229393	0.0695595	0.462097	ABHD11	83451
221984_s_at	0.780491	0.342294	4.69031	0.000231394	0.0699331	0.453466	FAM134A	79137
205642_at	-0.975834	-0.50903	-4.68585	0.00023355	0.0703975	0.44425	CNTRL	11064
218852_at	0.510244	0.106412	4.68233	0.000235267	0.070681	0.436969	PPP2R3C	55012
201998_at	-0.637059	0.0841921	-4.67905	0.000236873	0.0709255	0.430209	ST6GAL1	6480
236487_at	-0.781756	-0.559323	-4.67579	0.000238488	0.07122	0.423457	SCLT1	132320
228235_at	-1.39715	-0.853403	-4.67383	0.000239462	0.0713756	0.419405	MIR503HG	84848, 494336
52940_at	0.855286	0.450079	4.6722	0.000240273	0.0714799	0.416046	SIGIRR	59307
205569_at	-1.30423	-0.83747	-4.65995	0.000246473	0.0725934	0.390734	LAMP3	27074
1552332_at	0.426805	0.154413	4.65535	0.000248846	0.0730912	0.38121	TRIOBP	11078
206034_at	1.02181	0.0147208	4.65491	0.000249075	0.0730912	0.380298	SERPINB8	5271
227184_at	0.85576	0.475623	4.65222	0.000250472	0.0733825	0.374741	PTAFR	5724
1570125_at	0.695811	-0.107341	4.65207	0.000250552	0.0733825	0.374425	GHET1	102723099
208937_s_at	1.24036	0.54877	4.6454	0.000254054	0.0741579	0.360634	ID1	3397
209159_s_at	1.2356	0.799101	4.64517	0.000254177	0.0741579	0.360151	NDRG4	65009
225601_at	-0.895459	-0.476389	-4.64453	0.000254514	0.0742087	0.358834	HMGB3	3149
227006_at	-1.02085	0.15227	-4.6425	0.000255591	0.0743319	0.354642	PPP1R14A	94274
205395_s_at	-0.906121	-0.322084	-4.64097	0.000256407	0.0744264	0.351476	MRE11A	4361
206020_at	0.654326	-0.113206	4.63922	0.000257342	0.0745552	0.347857	SOCS6	9306
218973_at	0.832598	0.55466	4.6363	0.000258916	0.0747256	0.3418	EFL1	79631
206116_s_at	-1.1638	-0.742086	-4.62371	0.000265798	0.0761021	0.315741	TPM1	7168
200665_s_at	-1.0837	-0.330461	-4.62217	0.000266651	0.0761962	0.312559	SPARC	6678
223919_at	-0.913553	-0.324234	-4.62113	0.000267229	0.0763016	0.310411	TP53AIP1	63970
201857_at	0.481205	0.317033	4.61301	0.00027179	0.077018	0.293601	ZFR	51663
240310_at	0.490175	0.314465	4.61293	0.00027184	0.077018	0.293418	TOR1AIP1	26092
231227_at	0.790894	0.547572	4.61275	0.000271939	0.077018	0.293056
205730_s_at	0.504636	0.0936023	4.61146	0.000272669	0.0771287	0.290394	ABLIM3	22885
222802_at	-1.18728	-0.882773	-4.60798	0.000274658	0.0775982	0.283175	EDN1	1906
231698_at	-0.97708	-0.317302	-4.60766	0.00027484	0.0775982	0.282515
207291_at	-0.76981	-0.197281	-4.60114	0.000278606	0.0784726	0.269001	PRRG4	79056
244804_at	1.12635	0.640634	4.6011	0.000278627	0.0784726	0.268924	SQSTM1	8878
215417_at	0.427421	-0.0914536	4.59722	0.000280892	0.0790124	0.260887	EXOC6B	23233
1554121_at	0.563409	-0.101866	4.59133	0.000284366	0.0796449	0.24868	HSD17B12	51144
223488_s_at	-0.696976	-0.416634	-4.58496	0.000288174	0.0804184	0.235469	GNB4	59345
1555118_at	0.88129	0.47157	4.58188	0.000290032	0.0806584	0.22909	ENTPD3	956
204820_s_at	-1.00953	-0.180893	-4.58029	0.000290999	0.0806584	0.225783	BTN3A3, BTN3A2	10384, 11118
203595_s_at	-0.839856	-0.674017	-4.57659	0.000293256	0.081037	0.218114	IFIT5	24138
213469_at	-0.643374	-0.00768974	-4.57398	0.000294858	0.0812822	0.212704	PGAP1	80055
224987_at	0.419864	-0.0979987	4.57184	0.000296178	0.0815391	0.208267	C6orf89	221477
1554341_a_at	0.583601	-0.211729	4.5716	0.000296328	0.0815391	0.207767	HELQ	113510
213813_x_at	-0.970729	-0.550143	-4.56981	0.000297437	0.0817454	0.204058
230254_at	-0.878679	-0.499846	-4.56787	0.000298642	0.0818788	0.200042	FAM26E	254228
209449_at	-0.576434	-0.17591	-4.5617	0.00030252	0.0821988	0.187235	LSM2	57819
219222_at	0.616531	-0.0905971	4.55863	0.000304465	0.0825893	0.180873	RBKS	64080
206969_at	0.879577	0.563994	4.55118	0.000309245	0.0832798	0.165409	KRT34	3885
226961_at	0.868854	0.526651	4.55078	0.000309506	0.0833007	0.164572	PRR15	222171
235124_at	0.70064	-0.20407	4.54856	0.000310946	0.0834909	0.159962	EIF3J-AS1
205961_s_at	-1.16913	-0.0267331	-4.54572	0.000312794	0.0838385	0.154082	PSIP1	11168
204508_s_at	-1.17187	0.120621	-4.52967	0.000323477	0.0860427	0.12075	CA12	771
236359_at	-1.54269	0.0147571	-4.52651	0.00032562	0.0863098	0.114198	SCN4B	6330
205687_at	0.457391	0.288666	4.51453	0.000333893	0.0881433	0.0892978	UBFD1	56061
227272_at	0.564168	-0.0435177	4.50384	0.000341452	0.0894028	0.0670876	C15orf52, RNA5SP392	388115
209846_s_at	-0.683556	-0.0627806	-4.50348	0.000341704	0.0894028	0.066354	BTN3A2	11118
211921_x_at	-0.636311	-0.268857	-4.5026	0.000342339	0.0894898	0.0645126	PTMA, PTMAP5, PTMAP2	5757, 728026, 100302285
210705_s_at	-0.725472	-0.431626	-4.50178	0.000342926	0.0895668	0.0628138	TRIM5	85363
227614_at	1.40297	1.01218	4.50127	0.000343291	0.0895668	0.0617564	HKDC1	80201
224971_at	-0.509678	-0.29156	-4.4927	0.000349515	0.0907917	0.043931	MRPL30	51263
222236_s_at	-0.503223	-0.112888	-4.49195	0.000350061	0.0908004	0.0423809	ASAP3	55616
201195_s_at	1.14426	0.757575	4.4917	0.000350246	0.0908004	0.0418576	SLC7A5	8140
243524_at	0.511748	0.350438	4.48835	0.000352712	0.0910557	0.0348988
209093_s_at	0.444809	-0.10872	4.47575	0.000362154	0.0930406	0.00869092	GBAP1, GBA	2630, 2629
209337_at	-1.22551	-0.0579744	-4.47549	0.000362351	0.0930406	0.00815374	PSIP1	11168
202817_s_at	-0.432137	-0.276971	-4.47042	0.000366226	0.0937408	-0.00239871	SS18	6760
218634_at	0.552976	0.273755	4.46637	0.000369355	0.0943823	-0.0108357	PHLDA3	23612
201848_s_at	-1.02896	-0.462421	-4.46521	0.000370255	0.0945592	-0.0132504	BNIP3, BNIP3P1	664
240119_at	-0.670657	-0.436367	-4.46491	0.000370482	0.0945642	-0.013859	TEPP	374739
226924_at	0.666641	-0.067941	4.46294	0.000372017	0.0948495	-0.0179594	LINC00909	400657
202854_at	-0.643799	-0.476152	-4.46203	0.000372733	0.0949273	-0.0198667	HPRT1	3251
227291_s_at	-0.484583	-0.226374	-4.45704	0.000376656	0.0958173	-0.0302484	BOLA3	388962
1555731_a_at	-0.547637	-0.458599	-4.45503	0.000378249	0.0959833	-0.0344346	AP1S3	130340
203148_s_at	-0.937919	-0.482318	-4.45488	0.000378363	0.0959833	-0.0347346	TRIM14	9830
217166_at	-0.363515	-0.232147	-4.45436	0.000378776	0.0960299	-0.0358154	PTMAP1
219364_at	-0.494229	-0.219457	-4.45258	0.000380194	0.096233	-0.0395213	DHX58	79132
1555733_s_at	-0.548107	-0.442527	-4.45205	0.000380623	0.0962879	-0.0406385	AP1S3	130340
221873_at	0.578557	0.384637	4.45132	0.0003812	0.0963269	-0.0421424	ZNF143	7702
213573_at	-0.467331	0.0959487	-4.44484	0.000386426	0.0970543	-0.0556435	KPNB1	3837
203642_s_at	-0.628065	-0.273792	-4.44426	0.000386895	0.0971185	-0.0568469	COBLL1	22837
200070_at	0.376635	-0.0748287	4.43747	0.000392452	0.0981299	-0.0709868	CNPPD1	27013
213911_s_at	-0.506899	-0.00356291	-4.43723	0.00039265	0.0981299	-0.0714874	H2AFZ	3015
219221_at	0.440795	0.262933	4.42238	0.000405087	0.100301	-0.102401	ZBTB38	253461
218325_s_at	0.588134	-0.247188	4.41956	0.000407495	0.100624	-0.108279	DIDO1	11083
235745_at	0.7303	0.386546	4.40953	0.00041618	0.102379	-0.129183	ERN1	2081
201337_s_at	-0.588495	-0.351001	-4.40633	0.00041899	0.102931	-0.135853	VAMP3	9341
219630_at	-1.21005	-0.520064	-4.39512	0.000428988	0.104624	-0.159224	PDZK1IP1	10158
212622_at	0.502686	0.354038	4.39297	0.00043093	0.104929	-0.163702	TMEM41B	440026
238520_at	-1.21211	-0.070784	-4.38924	0.000434328	0.105531	-0.171483	TRERF1	55809
219644_at	-0.624664	-0.279455	-4.38473	0.000438467	0.106156	-0.180883	CEP83	51134
204748_at	1.0197	0.956403	4.38436	0.000438804	0.106165	-0.181645	PTGS2	5743
226847_at	-1.16745	-0.644779	-4.38191	0.000441074	0.106544	-0.186757	FST	10468
221746_at	0.476467	0.202527	4.37958	0.000443248	0.106955	-0.19163	UBL4A	8266
216988_s_at	0.420438	0.21008	4.37741	0.000445272	0.107216	-0.196143	PTP4A2	8073
213762_x_at	-0.736849	-0.43173	-4.37638	0.000446239	0.107374	-0.198292	RBMX, , RBMXP2	27316
219078_at	0.467197	-0.120105	4.37402	0.000448461	0.107585	-0.203215	GPATCH2	55105
205780_at	0.579165	0.322862	4.36496	0.000457096	0.10891	-0.222109	BIK	638
236346_at	0.906624	0.742369	4.35938	0.000462502	0.10982	-0.233757
210986_s_at	-0.943364	-0.673322	-4.35633	0.000465479	0.110272	-0.240113	TPM1	7168
235825_at	0.535491	-0.00100994	4.3519	0.000469848	0.111076	-0.249367
242363_at	-0.699725	-0.424142	-4.35057	0.000471166	0.111329	-0.252142
203019_x_at	-0.544649	0.137682	-4.34404	0.000477692	0.112346	-0.265767	SSX2IP	117178
219566_at	0.531502	0.271231	4.34378	0.000477955	0.112347	-0.266313	PLEKHF1	79156
207057_at	-0.75386	-0.0344396	-4.33391	0.000488003	0.113888	-0.286918	SLC16A7	9194
230657_at	1.06689	0.610719	4.33277	0.000489175	0.114103	-0.289294	TMEM165	55858
201780_s_at	0.40243	0.214739	4.33142	0.00049057	0.114266	-0.292113	RNF13	11342
220083_x_at	-0.656259	-0.40626	-4.32941	0.000492649	0.114444	-0.296301	UCHL5	51377
202684_s_at	0.846782	-0.0526546	4.32792	0.0004942	0.114628	-0.299415	RNMT	8731
229164_s_at	0.457646	0.208303	4.31741	0.000505275	0.116662	-0.321359	ABTB1	80325
233655_s_at	-0.583456	0.151117	-4.31428	0.000508624	0.117152	-0.3279	HAUS6	54801
210987_x_at	-1.10399	-0.66895	-4.31195	0.000511127	0.117535	-0.33276	TPM1	7168
221081_s_at	0.460275	0.475906	4.31092	0.000512246	0.117733	-0.334926	DENND2D	79961
209188_x_at	0.382012	-0.0323558	4.29674	0.000527803	0.120645	-0.364543	DR1	1810
235635_at	-0.786945	0.218393	-4.29291	0.00053208	0.12125	-0.372532	ARHGAP5	394
233488_at	1.59208	0.383072	4.29207	0.00053303	0.121345	-0.3743
33736_at	0.477335	-0.145086	4.28529	0.000540718	0.122543	-0.388472	STOML1	9399
218788_s_at	-0.485734	0.0458922	-4.28176	0.000544756	0.123152	-0.395837	SMYD3	64754
218997_at	-0.456183	-0.243331	-4.2814	0.000545177	0.12318	-0.3966	POLR1E	64425
230703_at	0.471074	0.114086	4.27731	0.000549908	0.124008	-0.405152
218922_s_at	-0.381231	0.124579	-4.27351	0.000554336	0.12476	-0.41309	CERS4	79603
223144_s_at	0.811826	0.427813	4.27322	0.000554678	0.124775	-0.413699	AKIRIN2	55122
202037_s_at	-1.10777	0.106305	-4.26212	0.000567837	0.126591	-0.4369	SFRP1	6422
204069_at	-0.529465	-0.114231	-4.25483	0.000576644	0.128069	-0.452128	MEIS1	4211
226679_at	0.690682	0.434798	4.2541	0.000577545	0.128207	-0.453673	SLC26A11	284129
228092_at	0.619612	-0.280116	4.24304	0.000591199	0.13041	-0.476787	CREM	1390
200738_s_at	-0.379247	-0.257374	-4.23689	0.00059894	0.131671	-0.489655	PGK1	5230
53912_at	0.397124	-0.196596	4.23495	0.000601403	0.131945	-0.493716	SNX11	29916
204858_s_at	-0.515302	-0.277479	-4.23387	0.000602772	0.132093	-0.495964	TYMP, SCO2	1890, 9997
211352_s_at	0.462004	0.205742	4.23194	0.000605248	0.132201	-0.500018	NCOA3	8202
209221_s_at	0.519286	0.348065	4.22985	0.000607918	0.132619	-0.504373	OSBPL2	9885
236077_at	-0.856174	-0.390591	-4.22896	0.000609068	0.132742	-0.506241	GANC	2595
228482_at	0.683635	0.371147	4.21169	0.000631737	0.136118	-0.542379	TVP23C-CDRT4, CDRT4	100533496, 284040
220685_at	-0.569223	0.106752	-4.20693	0.000638123	0.136732	-0.552323	FAM120C	54954
200772_x_at	-0.598369	-0.236773	-4.20322	0.000643153	0.137341	-0.560087	, PTMA, PTMAP5, PTMAP2	5757, 728026, 100302285
228320_x_at	0.604625	0.356926	4.20228	0.000644447	0.137424	-0.562074	BICDL1	92558
206247_at	0.759127	0.31287	4.19893	0.000649025	0.137626	-0.569072	MICB	4277
218613_at	-0.819547	-0.0146787	-4.19743	0.000651087	0.137935	-0.572209	PSD3	23362
210020_x_at	-1.20056	-0.547873	-4.1962	0.000652791	0.138052	-0.574791	CALML3	810
202884_s_at	-0.333779	-0.383962	-4.19465	0.000654936	0.138327	-0.578034	PPP2R1B	5519
211077_s_at	0.674261	0.405236	4.19455	0.000655069	0.138327	-0.578236	TLK1	9874
208003_s_at	0.700165	0.540367	4.1933	0.000656811	0.138567	-0.580861	NFAT5	10725
217925_s_at	0.439743	0.229881	4.19284	0.000657451	0.138569	-0.581823	C6orf106	64771
200650_s_at	-0.385475	-0.208301	-4.18499	0.000668467	0.139642	-0.598249	LDHA,	3939
219885_at	-0.830737	-0.642444	-4.17908	0.000676885	0.140584	-0.610618	SLFN12	55106
225238_at	-0.542574	-0.00375451	-4.17881	0.000677283	0.140603	-0.611199	MSI2	124540
1564031_a_at	0.400112	0.259693	4.17814	0.000678232	0.140736	-0.612583	RELL2	285613
212944_at	0.413768	0.46894	4.17771	0.000678859	0.140802	-0.613496	SLC5A3	6526
217998_at	0.815075	0.687342	4.16773	0.000693364	0.14298	-0.634389	PHLDA1, NAP1L1	22822, 4673
211450_s_at	-0.617039	-0.0211504	-4.16394	0.000698946	0.143658	-0.642312	MSH6	2956
205172_x_at	-0.409681	-0.274485	-4.15625	0.000710435	0.145193	-0.658421	CLTB	1212
203355_s_at	-0.669388	0.0503602	-4.1559	0.000710971	0.145211	-0.659167	PSD3	23362
228762_at	-0.584733	-0.421421	-4.15529	0.000711881	0.145238	-0.660431	LFNG	3955
242907_at	-0.575921	-0.379763	-4.15522	0.000711995	0.145238	-0.660589	GBP2	2634
203219_s_at	-0.356295	-0.21041	-4.15382	0.00071411	0.145485	-0.663519	APRT	353
203284_s_at	-0.447734	-0.0362755	-4.15068	0.000718873	0.145809	-0.670087	HS2ST1	9653
204455_at	-0.824199	-0.30245	-4.14441	0.000728497	0.146943	-0.683225	DST	667
1554411_at	-0.588164	-0.440551	-4.14203	0.000732178	0.147358	-0.688204	CTNNB1	1499
214240_at	-0.987282	-0.176883	-4.13953	0.000736075	0.147954	-0.693448	GAL	51083
204222_s_at	-0.931142	-0.798312	-4.13943	0.000736224	0.147954	-0.693648	GLIPR1	11010
213970_at	-0.549362	-0.326363	-4.13821	0.000738134	0.148033	-0.696207	RABL3	285282
217742_s_at	0.46791	0.276034	4.13674	0.000740442	0.14843	-0.69929	WAC	51322
223441_at	0.678956	0.382046	4.12695	0.000755977	0.150747	-0.719797	SLC17A5	26503
209323_at	-0.515181	-0.384805	-4.12539	0.000758472	0.151113	-0.723052	THAP12	5612
219540_at	0.557878	0.272289	4.12158	0.000764638	0.152074	-0.731047	ZNF267	10308
230494_at	1.2312	0.914821	4.11938	0.000768215	0.152586	-0.735656	SLC20A1	6574
205788_s_at	0.348904	0.247669	4.11659	0.000772776	0.153097	-0.741501	ZC3H11B, ZC3H11A	441155, 9877
242786_at	0.707976	0.536903	4.11441	0.000776356	0.153465	-0.746066	SBF2-AS1	283104
226431_at	-0.681765	0.06574	-4.11423	0.000776657	0.153465	-0.746448	FAM117B	150864
1560222_at	0.56749	0.492741	4.1142	0.000776693	0.153465	-0.746494
218125_s_at	-0.602671	0.0187713	-4.11179	0.00078068	0.153919	-0.751549	CCDC25	55246
244689_at	0.583768	0.40673	4.11131	0.000781477	0.154009	-0.752557	PPARA	5465
224856_at	-0.636617	-0.507443	-4.11063	0.000782608	0.154165	-0.753985	FKBP5	2289
216623_x_at	-1.37062	0.50276	-4.10883	0.000785601	0.154421	-0.757754	TOX3	27324
243271_at	-0.719317	-0.512	-4.10768	0.000787527	0.154666	-0.760171
205406_s_at	-0.610888	-0.469925	-4.10617	0.000790047	0.15496	-0.763326	SPA17	53340
235324_at	-0.633579	-0.282643	-4.10381	0.000794021	0.155404	-0.76828	SRSF3	6428
57540_at	0.790848	-0.170931	4.10127	0.000798307	0.155841	-0.773594	RBKS	64080
215913_s_at	0.888668	0.613356	4.09095	0.000815989	0.158071	-0.79522	GULP1	51454
214519_s_at	-0.59726	-0.442713	-4.08718	0.000822552	0.158802	-0.803126	RLN2	6019
212859_x_at	-0.560417	-0.156719	-4.08227	0.000831172	0.160126	-0.813415	MT1E	4493
209679_s_at	-0.372354	-0.287041	-4.07621	0.000841937	0.161789	-0.826115	SMAGP	57228
216674_at	-0.701697	-0.563085	-4.07247	0.000848638	0.162758	-0.833938	HES2	54626
213528_at	0.500871	-0.272817	4.07094	0.000851398	0.162987	-0.837142	METTL18	92342
222118_at	-0.723972	-0.270796	-4.0651	0.000862029	0.163991	-0.849386	CENPN	55839
211612_s_at	0.4167	-0.167801	4.06509	0.000862052	0.163991	-0.849412	IL13RA1	3597
225842_at	0.940278	0.995431	4.05874	0.000873768	0.165804	-0.862731	PHLDA1, NAP1L1	22822, 4673
219268_at	0.366639	0.367203	4.05646	0.000878005	0.166261	-0.867503	ETNK2	55224
203065_s_at	-0.834669	-0.649833	-4.05351	0.000883522	0.16682	-0.873682	CAV1	857
208892_s_at	0.613105	0.409346	4.04562	0.000898463	0.169035	-0.890224	DUSP6	1848
232760_at	-0.424731	-0.102962	-4.04516	0.000899339	0.169035	-0.891185	TEX15	56154
235337_at	-0.627406	-0.655579	-4.04452	0.000900568	0.1691	-0.892532	SERTAD4	56256
1553974_at	-0.681526	-0.358243	-4.04317	0.000903161	0.169398	-0.895368	C22orf39	128977
201611_s_at	-0.380305	0.0298559	-4.04047	0.000908359	0.169678	-0.901028	ICMT	23463
204181_s_at	0.559197	0.349583	4.039	0.0009112	0.170019	-0.904108	ZBTB43	23099
224150_s_at	-0.534215	0.203064	-4.03358	0.000921757	0.171336	-0.915468	CEP70	80321
212621_at	-0.556834	0.12175	-4.02352	0.000941678	0.173749	-0.936552	NEMP1	23306
212735_at	0.652028	0.365131	4.02336	0.000941993	0.173749	-0.936882	RUBCN	9711, 100126321
228135_at	0.400523	0.187156	4.01554	0.000957789	0.175594	-0.953277	C1orf52	148423
227385_at	0.606473	-0.132313	4.0076	0.000974103	0.177296	-0.969927	PLPP6	403313
223469_at	0.709631	0.377508	4.0074	0.000974515	0.177296	-0.970345	PGPEP1	54858
215867_x_at	-0.942869	0.177755	-4.00465	0.000980238	0.177988	-0.976116	CA12	771
214164_x_at	-0.949947	0.15693	-4.00147	0.00098689	0.178839	-0.982782	CA12	771
225372_at	0.921408	0.540305	4.00019	0.000989587	0.179017	-0.985472	C10orf54	64115
223179_at	0.487585	0.482199	3.99456	0.00100151	0.179769	-0.997277	YPEL3	83719
204422_s_at	1.28328	0.898247	3.99128	0.00100852	0.180672	-1.00415	FGF2	2247
210976_s_at	-0.704658	0.00139017	-3.99107	0.00100896	0.180678	-1.00458	PFKM	5213
231880_at	1.08422	0.806638	3.98824	0.00101507	0.181344	-1.01053	STRIP2	57464
228250_at	0.722134	0.468066	3.98614	0.0010196	0.182011	-1.01492	FNIP1	96459
218037_at	0.551683	0.359614	3.98409	0.00102407	0.182593	-1.01923	FAM134A	79137
1554287_at	0.744199	-0.0860026	3.98194	0.00102875	0.183135	-1.02372	TRIM4	89122
203919_at	-0.60428	0.0494375	-3.96601	0.00106424	0.187842	-1.05713	TCEA2	6919
213892_s_at	-0.3334	-0.209087	-3.96415	0.00106845	0.188219	-1.06102	APRT	353
203359_s_at	-0.583583	-0.416213	-3.95753	0.00108362	0.189947	-1.0749	, MYCBP	26292
230361_at	0.685427	-0.150947	3.9575	0.00108368	0.189947	-1.07497	MROH1	727957
232217_at	-1.05683	-0.731259	-3.94625	0.00110996	0.193064	-1.09856	FAM26E	254228
227875_at	-1.32603	-0.587288	-3.94543	0.0011119	0.193328	-1.10028	KLHL13	90293
212552_at	0.826444	0.46923	3.94341	0.00111669	0.193939	-1.10451	HPCAL1	3241
213489_at	-0.402482	-0.32551	-3.94251	0.00111884	0.194237	-1.1064	MAPRE2	10982
238649_at	0.536755	0.520764	3.92927	0.00115084	0.198204	-1.13417	PITPNC1	26207
226468_at	0.35686	0.117162	3.92204	0.00116869	0.200618	-1.14932	RNF115	27246
218511_s_at	-0.614134	-0.365833	-3.91803	0.00117872	0.201783	-1.15773	PNPO	55163
228014_at	-0.32667	-0.337929	-3.91538	0.00118538	0.202543	-1.16328	PTRH1	138428
220672_at	1.07123	0.574144	3.90555	0.00121049	0.205614	-1.1839	PPP4R4	57718
220422_at	0.293934	-0.0609696	3.90235	0.00121875	0.206615	-1.1906	UBQLN3	50613
239358_at	0.726004	0.654972	3.90106	0.0012221	0.206925	-1.1933
206284_x_at	-0.402906	-0.263835	-3.89466	0.0012389	0.208924	-1.20673	CLTB	1212
230364_at	-0.503097	0.0146572	-3.89417	0.00124018	0.208926	-1.20774	CHPT1	56994
1555950_a_at	0.579963	0.547884	3.88908	0.00125372	0.210193	-1.21843	CD55	1604
226258_at	0.66676	0.375071	3.88413	0.001267	0.211618	-1.22879	AMN1	196394
214430_at	0.723981	0.510909	3.88401	0.00126734	0.211618	-1.22905	GLA	2717
218537_at	-0.460263	0.146173	-3.88084	0.00127593	0.21274	-1.2357	HCFC1R1	54985
241721_at	0.419089	0.463575	3.87775	0.00128435	0.21344	-1.24217
217828_at	0.322727	0.290303	3.86666	0.00131509	0.216987	-1.26542	SLTM	79811
201888_s_at	0.525985	-0.12556	3.86602	0.00131688	0.217124	-1.26676	IL13RA1	3597
217978_s_at	0.306572	0.173543	3.86164	0.00132923	0.218424	-1.27594	UBE2Q1	55585
237262_at	0.479844	0.278527	3.85836	0.00133855	0.21948	-1.28281	GAREM1	64762
223013_at	0.319291	0.169536	3.85769	0.00134048	0.219638	-1.28422	TBL1XR1	79718
218003_s_at	-0.335294	-0.285756	-3.8566	0.00134361	0.219913	-1.28652	FKBP3	2287
228822_s_at	0.407279	-0.100537	3.85561	0.00134643	0.219977	-1.28858	USP16	10600
221650_s_at	0.380775	0.111817	3.85432	0.00135013	0.220346	-1.29128	MED18	54797
202729_s_at	-0.826011	0.0403811	-3.85255	0.00135525	0.22078	-1.295	LTBP1	4052
221988_at	0.475063	0.458466	3.84865	0.00136656	0.221834	-1.30317	SMIM7	79086
225698_at	0.627773	0.519944	3.84776	0.00136916	0.222177	-1.30504	EPB41L4A-AS1
234106_s_at	0.595608	0.306261	3.84351	0.00138163	0.223164	-1.31394	FLYWCH1	84256
235610_at	0.578646	-0.168446	3.83511	0.0014066	0.225915	-1.33155	ALKBH8	91801
202949_s_at	0.566979	0.35274	3.83405	0.00140978	0.226222	-1.33376	FHL2	2274
229090_at	0.483682	-0.188356	3.83374	0.00141071	0.226222	-1.33442	ZEB1-AS1
242218_at	0.782543	-0.169764	3.83365	0.001411	0.226222	-1.33462
224841_x_at	0.526777	0.34443	3.83089	0.00141932	0.227316	-1.34039	GAS5	60674
236429_at	1.23137	1.01452	3.82982	0.00142257	0.227756	-1.34264
209531_at	-0.636073	-0.374863	-3.82325	0.00144264	0.229837	-1.35641	GSTZ1	2954
227525_at	0.575859	0.414847	3.82302	0.00144334	0.229867	-1.35688	GLCCI1	113263
207950_s_at	-0.64412	-0.297153	-3.81454	0.00146968	0.232192	-1.37464	ANK3	288
212704_at	-0.321146	0.0656814	-3.80877	0.0014879	0.233933	-1.38675	ZCCHC11	23318
227541_at	0.565391	-0.0745032	3.80489	0.00150026	0.235307	-1.39487	WDR20	91833
227801_at	-0.664719	-0.62301	-3.79631	0.00152797	0.238338	-1.41284	TRIM59	286827
221041_s_at	0.409264	0.325464	3.79287	0.00153924	0.239229	-1.42006	SLC17A5	26503
217777_s_at	-0.643928	-0.0635329	-3.79146	0.00154386	0.239584	-1.423	HACD3	51495
229549_at	-0.437697	0.260395	-3.79055	0.00154688	0.239808	-1.42492	CALU	813
241353_s_at	0.34375	0.292591	3.78398	0.00156871	0.241955	-1.43868
204840_s_at	-0.525373	-0.212765	-3.78064	0.00157991	0.243188	-1.44566	EEA1	8411
211987_at	-0.309753	-0.188603	-3.77794	0.00158904	0.24385	-1.45132	TOP2B	7155, 100616477
222472_at	0.381921	0.241621	3.77464	0.0016003	0.245082	-1.45824	AFTPH	54812
214838_at	0.515175	-0.113877	3.77362	0.00160378	0.245449	-1.46038	SFT2D2	375035
241360_at	-0.663398	-0.427371	-3.76451	0.00163526	0.24907	-1.47945	CCDC15	80071
226319_s_at	-0.387357	-0.242267	-3.76124	0.0016467	0.250333	-1.48629	ALYREF	10189
224524_s_at	0.348301	0.178838	3.76007	0.00165083	0.250711	-1.48875	GPR75-ASB3, ASB3	100302652, 51130
219093_at	-0.433687	0.0837172	-3.75508	0.00166851	0.252519	-1.4992	PID1	55022
1554342_s_at	0.395016	-0.227489	3.7527	0.00167699	0.253498	-1.50417	HELQ	113510
215930_s_at	0.494647	0.374833	3.74662	0.00169891	0.256215	-1.51691	, CTAGE5	4253
237031_at	0.647469	0.422675	3.74406	0.00170821	0.257192	-1.52227
37950_at	-0.506302	-0.330811	-3.73913	0.00172629	0.25863	-1.5326	PREP	5550
210871_x_at	-0.481799	0.13698	-3.7386	0.00172824	0.258837	-1.5337	SSX2IP	117178
224741_x_at	0.497468	0.34702	3.73735	0.00173285	0.259356	-1.53631	GAS5	60674
1554274_a_at	0.635154	0.381098	3.73306	0.00174879	0.261049	-1.5453	SSH1	54434
206550_s_at	-0.487221	-0.353159	-3.73292	0.00174933	0.261049	-1.54559	NUP155	9631
225750_at	-0.579581	-0.246843	-3.73107	0.00175623	0.261822	-1.54946	ERO1A	30001
204180_s_at	0.591136	0.3914	3.72822	0.00176696	0.262537	-1.55543	ZBTB43	23099
1568868_at	-0.781545	-0.154204	-3.72816	0.00176719	0.262537	-1.55556	CYP27C1	339761
202259_s_at	-0.530664	-0.284425	-3.7238	0.00178371	0.263843	-1.56468	N4BP2L2	10443
1553982_a_at	-0.943898	-0.774035	-3.72246	0.00178882	0.264172	-1.56748	RAB7B	338382
223438_s_at	0.511001	0.517992	3.72078	0.00179521	0.264598	-1.57098	PPARA	5465
234998_at	-0.810941	-0.502251	-3.71458	0.00181915	0.266829	-1.58396	RAB11A	8766
214259_s_at	-0.442688	-0.308094	-3.70912	0.00184047	0.268757	-1.59538	AKR7A2	8574
219730_at	0.446209	0.238345	3.70885	0.00184155	0.268815	-1.59596	MED18	54797
223773_s_at	0.809267	0.42187	3.70561	0.00185433	0.269469	-1.60274	SNHG12	85028
203192_at	0.494834	0.174557	3.70125	0.00187166	0.271467	-1.61185	ABCB6, ATG9A	10058, 79065
218073_s_at	-0.695819	-0.0482515	-3.70075	0.00187367	0.271672	-1.6129	NDC1	55706
204117_at	-0.444882	-0.292778	-3.69881	0.00188142	0.272448	-1.61695	PREP	5550
212130_x_at	0.452276	0.376286	3.69828	0.00188356	0.27254	-1.61806	EIF1	10209
227235_at	-0.909859	-0.503891	-3.69773	0.00188578	0.272559	-1.61921
236079_at	-0.413741	0.163431	-3.69661	0.0018903	0.272865	-1.62156
204552_at	-0.367013	0.0468413	-3.69622	0.00189188	0.272915	-1.62238	INPP4A	3631
225721_at	-0.349136	-0.24521	-3.69279	0.00190578	0.274316	-1.62955	SYNPO2	171024
224173_s_at	-0.665346	-0.489182	-3.68454	0.00193965	0.277344	-1.64681	, MRPL30	51263
222702_x_at	0.406851	-0.130193	3.68381	0.00194264	0.277515	-1.64832	CRIPT	9419
223035_s_at	-0.568521	-0.421134	-3.67792	0.00196724	0.279886	-1.66064	FARSB	10056
239406_at	0.490609	-0.18622	3.67278	0.00198893	0.281738	-1.67138	ZSCAN9	7746
241482_at	0.526115	0.360399	3.67027	0.00199964	0.282464	-1.67664	EPHA1	2041
203026_at	0.289507	0.185383	3.66848	0.0020073	0.282931	-1.68038	ZBTB5	9925
208453_s_at	-0.339814	-0.249448	-3.66561	0.00201964	0.283719	-1.68639	XPNPEP1	7511
203505_at	0.784307	0.595078	3.66062	0.00204126	0.285481	-1.69681	ABCA1	19
206809_s_at	-0.535559	-0.272222	-3.65438	0.00206866	0.28801	-1.70986	HNRNPA3	220988, 100616394
219880_at	0.439395	0.31911	3.65349	0.00207257	0.288248	-1.71171
227111_at	0.362663	0.297059	3.65289	0.00207522	0.288391	-1.71296	ZBTB34	403341
226513_at	0.367376	0.208768	3.65249	0.00207702	0.288391	-1.71381	ASB7	140460
219756_s_at	-0.873864	-0.589206	-3.65247	0.00207711	0.288391	-1.71385	POF1B	79983
220140_s_at	0.371994	-0.112716	3.65153	0.00208126	0.288615	-1.7158	SNX11	29916
205164_at	-0.365461	-0.336521	-3.64193	0.00212436	0.292896	-1.73587	GCAT	23464
212227_x_at	0.453249	0.367211	3.63616	0.00215071	0.295632	-1.74793	EIF1	10209
224783_at	0.531571	0.502208	3.63521	0.00215508	0.295875	-1.74991	UBALD2	283991
243069_at	0.402236	-0.129684	3.63468	0.0021575	0.296049	-1.75101
223723_at	0.711355	-0.00122139	3.63004	0.00217897	0.298081	-1.7607	MELTF	4241
231733_at	-1.06288	-0.615642	-3.62636	0.00219619	0.29962	-1.7684	CARD18	59082
202021_x_at	0.451994	0.388103	3.62608	0.0021975	0.299623	-1.76898	EIF1	10209
223843_at	-0.467907	0.222969	-3.62541	0.00220065	0.299689	-1.77038	SCARA3	51435
200864_s_at	-0.467749	-0.316199	-3.62327	0.00221072	0.300787	-1.77485	RAB11A	8766
229182_at	0.48479	-0.0461481	3.61672	0.00224182	0.303389	-1.78851	TMEM199	147007, 100616388
231192_at	-0.526987	0.151602	-3.6144	0.00225299	0.304085	-1.79337	LPAR3	23566
210813_s_at	-0.571828	-0.414722	-3.61338	0.00225789	0.304476	-1.7955	XRCC4	7518
226929_at	0.67818	0.420947	3.60967	0.00227586	0.305786	-1.80325	MTHFR	4524
230259_at	-0.599349	-0.359817	-3.60957	0.00227635	0.305786	-1.80346	FUOM	282969
219587_at	-0.432841	-0.36151	-3.60731	0.00228734	0.30672	-1.80817	TTC12	54970
230528_s_at	0.47666	0.400768	3.60588	0.00229435	0.307297	-1.81116	CENPBD1P1	65996
201959_s_at	-0.388163	0.0168756	-3.60216	0.00231263	0.308293	-1.81892	MYCBP2	23077
225161_at	-0.470885	-0.307408	-3.60092	0.00231874	0.308766	-1.8215	GFM1	85476
230444_at	0.65389	0.529563	3.59493	0.0023486	0.311355	-1.83401
238890_at	0.571005	0.581595	3.59468	0.00234988	0.311433	-1.83454	BRWD1	54014
203732_at	0.357001	-0.080799	3.59377	0.00235441	0.311761	-1.83642	TRIP4	9325
203596_s_at	-0.751482	-0.473619	-3.59319	0.00235737	0.311971	-1.83765	IFIT5	24138
1556613_s_at	-0.531697	-0.391945	-3.59206	0.00236302	0.312538	-1.83999	DPY19L4	286148
202082_s_at	0.537636	0.39318	3.58808	0.00238322	0.314751	-1.84831	SEC14L1	6397
216064_s_at	-0.579727	-0.393828	-3.57549	0.00244815	0.320535	-1.87457	AGA	175
214075_at	0.311396	0.148324	3.5723	0.00246483	0.321885	-1.88121	NENF	29937
228899_at	0.635276	-0.17124	3.57113	0.00247102	0.321953	-1.88365
1558846_at	1.21767	1.00012	3.56962	0.00247899	0.322807	-1.8868	PNLIPRP3	119548
203658_at	0.526078	0.216201	3.56596	0.00249846	0.324506	-1.89444	SLC25A20	788
230296_at	0.89049	0.671372	3.55926	0.00253441	0.328006	-1.90839	C16orf52	730094, 102725138
213164_at	0.350372	0.472541	3.55703	0.00254654	0.328499	-1.91306	SLC5A3	6526
211932_at	-0.575296	-0.320946	-3.5557	0.00255376	0.329338	-1.91582	HNRNPA3	220988, 100616394
229488_at	0.436254	0.216957	3.55339	0.0025664	0.330125	-1.92064	OTUD7B	56957
227921_at	-0.551178	-0.293104	-3.55024	0.00258368	0.331524	-1.9272
201952_at	-0.362759	0.039008	-3.5461	0.00260662	0.333694	-1.93582	ALCAM	214
239035_at	0.725572	0.451261	3.53631	0.00266167	0.338929	-1.95622	MTHFR	4524
1557081_at	-0.660705	-0.362015	-3.52683	0.0027161	0.343477	-1.97598	RBM25	58517
224481_s_at	0.362395	0.265159	3.52081	0.00275117	0.346774	-1.9885	HECTD1	25831
200697_at	0.410115	0.358844	3.51977	0.00275729	0.347243	-1.99066	HK1	3098
227517_s_at	-0.679271	-0.451093	-3.51974	0.00275747	0.347243	-1.99073	GAS5	60674
202220_at	0.408324	0.367508	3.51893	0.00276226	0.347406	-1.99242	KIAA0907	22889
212914_at	0.454079	0.320437	3.5123	0.00280163	0.350632	-2.00622	CBX7	23492
212036_s_at	-0.317297	-0.0242364	-3.51057	0.00281197	0.351145	-2.00982	PNN	5411
229393_at	-0.648772	0.0414615	-3.50963	0.00281762	0.351216	-2.01177	L3MBTL3	84456
226863_at	1.39692	1.04567	3.50793	0.0028279	0.35192	-2.01533	FAM110C	642273
228834_at	0.398453	0.39895	3.50772	0.00282911	0.351974	-2.01575
227236_at	-0.853435	-0.757612	-3.50711	0.00283285	0.352247	-2.01703	TSPAN2	10100
223423_at	-0.790941	-0.511869	-3.50685	0.00283442	0.352345	-2.01757	GPR160	26996
227570_at	0.375791	-0.160325	3.50656	0.00283618	0.352467	-2.01818	TMEM86A	144110
219164_s_at	0.447971	0.176375	3.50607	0.00283911	0.35264	-2.01919	ATG2B	55102
233852_at	-0.573416	-0.435652	-3.50507	0.00284515	0.353041	-2.02126
228042_at	0.396722	0.0316448	3.50146	0.00286717	0.354708	-2.02878	ADPRH	141
202659_at	-0.458995	-0.330751	-3.50141	0.00286746	0.354708	-2.02888	, PSMB10	5699
235311_at	-0.467976	0.0913594	-3.49757	0.00289109	0.356951	-2.03688	FKBP14	55033
235678_at	-0.494865	0.0506051	-3.49364	0.00291544	0.359296	-2.04505	GM2A	2760
230492_s_at	0.454528	-0.112805	3.49348	0.0029164	0.359296	-2.04537	, GPCPD1	56261
212586_at	-0.449764	-0.246423	-3.4915	0.00292876	0.36072	-2.0495	CAST	831
203957_at	0.365959	0.113851	3.48803	0.00295055	0.362783	-2.05672	, E2F6, E2F6P1, E2F6P2, E2F6P3	1876
217672_x_at	0.394338	0.269244	3.48518	0.00296853	0.364156	-2.06264
224336_s_at	0.379123	0.184861	3.48333	0.00298027	0.364892	-2.06649	DUSP16	80824
211043_s_at	-0.349043	-0.243502	-3.47577	0.0030287	0.368485	-2.0822	CLTB	1212
214085_x_at	-0.786272	-0.565419	-3.4715	0.00305643	0.370555	-2.09108	GLIPR1	11010
217859_s_at	0.454785	-0.163289	3.46473	0.00310091	0.374619	-2.10515	SLC39A9	55334
224832_at	0.35352	0.260873	3.46072	0.00312753	0.376736	-2.11348	DUSP16	80824
219104_at	-0.653795	-0.462081	-3.45858	0.0031418	0.377467	-2.11792	RNF141	50862
224414_s_at	0.395939	-0.101296	3.45489	0.00316668	0.379641	-2.1256	CARD6	84674
238811_at	0.573073	0.235427	3.45222	0.00318477	0.380707	-2.13114	ATP11B	23200
1557961_s_at	-0.575788	0.184979	-3.45096	0.0031933	0.381325	-2.13375	C8orf88	100127983
202234_s_at	-0.362489	0.0439165	-3.44875	0.00320843	0.382429	-2.13835	SLC16A1	6566
201301_s_at	-0.402541	-0.368044	-3.44795	0.00321389	0.38288	-2.14001	ANXA4	307
230082_at	0.915124	0.600701	3.44521	0.0032327	0.384214	-2.14569	UBE2FP1
212573_at	-0.62468	-0.476983	-3.44397	0.00324125	0.385029	-2.14826	ENDOD1	23052
212055_at	-0.416827	-0.283143	-3.44018	0.00326758	0.387047	-2.15614	TPGS2	25941
201925_s_at	0.712408	0.765884	3.4386	0.00327861	0.387495	-2.15941	CD55	1604
203963_at	-0.877301	0.182263	-3.43854	0.00327905	0.387495	-2.15954	CA12	771
202907_s_at	-0.546564	-0.367379	-3.43802	0.00328262	0.387616	-2.16061	NBN	4683
202084_s_at	0.460665	0.289324	3.43719	0.00328847	0.387966	-2.16234	SEC14L1	6397
205773_at	0.766767	0.442847	3.4355	0.00330032	0.388495	-2.16584	CPEB3	22849
228754_at	1.21161	1.07618	3.43386	0.00331192	0.389056	-2.16925	SLC6A6	6533
202447_at	-0.502333	-0.399409	-3.42507	0.00337456	0.394376	-2.18748	DECR1	1666
232436_at	0.314491	-0.0672377	3.42186	0.0033977	0.396775	-2.19413	ZNF274	10782
205626_s_at	-0.408408	-0.444702	-3.41982	0.00341254	0.397589	-2.19837	CALB1	793
238513_at	-0.830104	-0.121153	-3.41812	0.00342492	0.398624	-2.2019	PRRG4	79056
203759_at	0.396944	0.278993	3.41289	0.00346331	0.40155	-2.21274	ST3GAL4	6484
225612_s_at	0.347626	0.256209	3.41084	0.00347845	0.402644	-2.21698	B3GNT5	84002
228853_at	-0.46803	-0.294121	-3.4026	0.00354007	0.40831	-2.23406	STYX	6815
212060_at	-0.326559	-0.255425	-3.39973	0.00356187	0.409429	-2.24003	U2SURP	23350
1560579_s_at	0.498086	0.378764	3.39287	0.00361431	0.414305	-2.25424	SLC16A1-AS1,	100506392
243982_at	0.705867	-0.1702	3.39203	0.00362076	0.414732	-2.25597
203354_s_at	-0.580358	0.0124871	-3.39116	0.00362744	0.415287	-2.25776	PSD3	23362
222759_at	0.383441	-0.141194	3.38611	0.00366674	0.418474	-2.26824	KMT5B	51111
37892_at	0.453267	0.238192	3.38202	0.00369882	0.420285	-2.2767	COL11A1	1301
212097_at	-0.619746	-0.554465	-3.37827	0.00372849	0.422099	-2.28446	CAV1	857
221788_at	0.488245	0.395148	3.37741	0.0037353	0.42232	-2.28624	PGM3	5238
45288_at	0.389183	0.381162	3.37713	0.00373751	0.422411	-2.28681	ABHD6	57406
238653_at	0.417215	0.331946	3.3767	0.00374093	0.422553	-2.2877	LRIG2	9860
236026_at	0.673491	0.320745	3.37595	0.00374691	0.423107	-2.28925	GPATCH2	55105
209231_s_at	0.34488	-0.337146	3.37391	0.00376326	0.424322	-2.29348	DCTN5	84516
220470_at	0.316843	0.00690476	3.36868	0.00380541	0.427484	-2.3043	BET1L	51272
223217_s_at	-0.512995	-0.234873	-3.36676	0.00382099	0.428705	-2.30827	NFKBIZ	64332
227655_at	-0.445139	0.198891	-3.36528	0.00383304	0.429739	-2.31133	SNHG18
203212_s_at	-0.316889	-0.271713	-3.36274	0.00385387	0.431132	-2.31659	MTMR2	8898
227942_s_at	0.349983	-0.142528	3.36272	0.003854	0.431132	-2.31662	CRIPT	9419
1560727_at	0.317792	-0.188728	3.35797	0.00389318	0.433428	-2.32645	HEATR4	399671
204221_x_at	-0.71815	-0.502329	-3.35418	0.00392474	0.436013	-2.33429	GLIPR1	11010
201060_x_at	-0.43428	0.0433839	-3.35057	0.00395503	0.437591	-2.34175	STOM	2040
202036_s_at	-0.645094	0.00457616	-3.34907	0.00396771	0.43858	-2.34486	SFRP1	6422
224160_s_at	-0.392946	-0.28984	-3.34882	0.00396977	0.438689	-2.34536	ACAD9	28976
209625_at	0.430675	0.233481	3.33529	0.00408583	0.4476	-2.37333	PIGH	5283
228575_at	-0.573811	0.0650739	-3.33197	0.00411474	0.449252	-2.38017	IL20RB	53833
207571_x_at	-0.709877	0.260192	-3.32632	0.00416458	0.453021	-2.39185	THEMIS2	9473
223542_at	-0.707238	-0.521069	-3.32606	0.00416683	0.453021	-2.39238	SLF1	84250
226349_at	-0.324545	-0.327534	-3.32602	0.00416719	0.453021	-2.39246	C12orf45	121053
207850_at	0.973733	0.285302	3.32523	0.00417425	0.453564	-2.3941	CXCL3	2921
206441_s_at	-0.41122	-0.309425	-3.32473	0.00417869	0.453728	-2.39513	COMMD4	54939
221480_at	-0.801647	-0.571115	-3.32207	0.00420239	0.455541	-2.40062	HNRNPD	3184
201302_at	-0.496546	-0.427321	-3.31872	0.00423247	0.458147	-2.40754	ANXA4	307
201109_s_at	-1.56511	-1.13616	-3.31774	0.00424133	0.458887	-2.40957	THBS1	7057
217492_s_at	0.41252	0.248142	3.3171	0.00424707	0.459399	-2.41088	PTENP1, PTEN	11191, 5728
226173_at	0.299175	0.260853	3.31289	0.00428533	0.461986	-2.41957	TBC1D25	4943
223774_at	0.944873	0.579893	3.31173	0.00429591	0.462689	-2.42197	SNORA16A, SNHG12	85028, 692073
227889_at	-0.368771	0.140748	-3.30815	0.0043287	0.464692	-2.42934	LPCAT2	54947
206561_s_at	1.7036	1.30431	3.30481	0.0043596	0.466469	-2.43624	AKR1B10	57016
213246_at	0.454793	0.339079	3.30404	0.00436676	0.467014	-2.43782	TMEM251	26175
1556588_at	0.717814	-0.125983	3.30269	0.00437927	0.468022	-2.4406	ST20-AS1
224817_at	0.58654	0.430922	3.29672	0.00443522	0.47267	-2.4529	SH3PXD2A	9644
220911_s_at	-0.68034	0.10995	-3.29631	0.00443908	0.47292	-2.45375	NYNRIN	57523
222616_s_at	0.336902	-0.0657265	3.29464	0.00445492	0.47373	-2.4572	USP16	10600
212133_at	0.291294	0.229503	3.292	0.00448001	0.474773	-2.46264	NIPA2	81614
228121_at	-1.06385	-0.77413	-3.29141	0.00448558	0.475184	-2.46384	TGFB2, TGFB2-OT1	7042, 103611157
224469_s_at	0.823001	0.795968	3.28831	0.00451531	0.477703	-2.47024	INF2	64423
213574_s_at	-0.422493	0.150029	-3.28812	0.00451711	0.477703	-2.47063	KPNB1	3837
226622_at	0.559776	0.446797	3.28724	0.00452557	0.478153	-2.47244	LINC00969, MUC20	200958
203964_at	-0.642093	-0.723663	-3.28289	0.00456765	0.480828	-2.48141	NMI	9111
1554489_a_at	-0.457274	0.0820755	-3.28256	0.00457082	0.480896	-2.48208	CEP70	80321
222686_s_at	-0.495966	-0.338961	-3.28236	0.00457279	0.480908	-2.4825	CPPED1	55313
218696_at	0.401344	0.385379	3.27978	0.00459789	0.482321	-2.4878	EIF2AK3	9451
239067_s_at	0.553125	0.485815	3.27814	0.00461394	0.483199	-2.49118	PANX2	56666
225086_at	-0.464812	-0.347471	-3.2776	0.00461929	0.483562	-2.4923	FAM98B	283742
205677_s_at	-0.724284	-0.0140179	-3.27376	0.00465714	0.485847	-2.5002	, DLEU1
223345_at	-0.443016	0.0650964	-3.27244	0.00467017	0.486648	-2.50291	HDAC8	55869
218830_at	-0.377807	-0.314724	-3.26587	0.00473584	0.490873	-2.51643	RPL26L1, RPL26P30	51121
235299_at	0.553093	0.417205	3.26212	0.00477378	0.493712	-2.52415	SLC41A2	84102
208718_at	0.321781	0.253518	3.2501	0.00489726	0.502144	-2.54887	DDX17	10521
203069_at	-0.405295	0.321945	-3.24406	0.00496047	0.506116	-2.56128	SV2A	9900
222403_at	-0.575242	-0.359977	-3.24395	0.00496167	0.506124	-2.56151	MTCH2	23788
221565_s_at	0.519291	0.308043	3.24228	0.00497929	0.507126	-2.56494	CALHM2	51063
204825_at	-0.595933	-0.00966071	-3.23543	0.00505224	0.512276	-2.57901	MELK	9833
226842_at	0.295925	0.248005	3.23537	0.00505284	0.512276	-2.57913	FBXL20	84961
232282_at	-0.365765	0.0864975	-3.23317	0.00507651	0.513805	-2.58365	WNK3	65267
224663_s_at	0.365865	-0.235361	3.22879	0.00512395	0.516538	-2.59264	CFL2	1073
209123_at	-0.563254	-0.484586	-3.22668	0.00514697	0.518514	-2.59697	QDPR	5860
227776_at	0.407475	0.35734	3.22392	0.00517719	0.520866	-2.60264	ACER3	55331
217097_s_at	-0.47175	0.120221	-3.2114	0.00531658	0.530664	-2.62831	PHTF2	57157
232095_at	-0.416847	0.0756781	-3.20922	0.00534126	0.53227	-2.63279	SRGAP2C, SRGAP2B	653464, 647135
221531_at	-0.511291	-0.396742	-3.20296	0.00541267	0.537313	-2.64562	, WDR61	80349
219582_at	-0.346519	-0.439573	-3.19698	0.00548166	0.542159	-2.65786	OGFRL1	79627
218386_x_at	0.311988	-0.114371	3.19307	0.00552731	0.545119	-2.66587	USP16	10600
208966_x_at	-0.495239	-0.264493	-3.19171	0.00554334	0.546345	-2.66866	IFI16	3428
225374_at	0.317719	-0.104806	3.19111	0.0055504	0.546922	-2.66989	TMEM199	147007, 100616388
220779_at	-0.529292	0.0923441	-3.18993	0.0055643	0.547461	-2.67231	PADI3	51702
38892_at	0.318863	0.245633	3.18823	0.00558431	0.548718	-2.67577	GLTSCR1L	23506
230472_at	0.618193	0.458426	3.18638	0.00560624	0.549649	-2.67956	IRX1	79192
37117_at	-0.349962	0.0403401	-3.1856	0.00561554	0.549777	-2.68116	ARHGAP8, PRR5-ARHGAP8	23779, 553158
202950_at	-0.339881	-0.236474	-3.18317	0.00564452	0.55178	-2.68613	CRYZ	1429
219525_at	0.483499	0.37588	3.18154	0.00566413	0.553146	-2.68947	SLC47A1	55244
230697_at	-0.348729	-0.221199	-3.17982	0.00568484	0.554531	-2.693	BBS5,	129880
208933_s_at	0.352012	0.260831	3.17448	0.00574957	0.558919	-2.70393	LGALS8	3964
210904_s_at	0.381071	-0.160862	3.17406	0.0057546	0.559259	-2.70477	IL13RA1	3597
205505_at	-0.359777	-0.282282	-3.17255	0.00577304	0.560721	-2.70786	GCNT1	2650
226388_at	-0.458964	0.312885	-3.16998	0.00580453	0.562699	-2.71311	TCEA3	6920
209049_s_at	-0.43112	0.406951	-3.16363	0.0058832	0.566461	-2.72609	ZMYND8	23613
244025_at	0.707815	0.553973	3.15872	0.00594469	0.569969	-2.73612	ITPRIP	85450
243953_at	0.463763	0.266016	3.1563	0.00597533	0.572183	-2.74108	FADS2	9415
204773_at	-0.366244	0.0700374	-3.15506	0.00599099	0.572824	-2.74361	IL11RA	3590
203758_at	-0.525024	-0.5147	-3.15401	0.00600433	0.573391	-2.74575	CTSO	1519
219378_at	0.510012	0.394707	3.14956	0.00606122	0.577368	-2.75484	NAA16	79612
227415_at	0.283461	0.270391	3.14244	0.00615326	0.58357	-2.76937	DGKH	160851
204847_at	0.359787	0.198365	3.14175	0.00616222	0.584054	-2.77078	ZBTB11	27107
1555829_at	-0.59766	-0.460894	-3.14023	0.00618209	0.585693	-2.77388	ESYT2	57488
239682_at	0.411982	-0.0748017	3.13678	0.00622732	0.588508	-2.78091
218888_s_at	-0.680333	-0.0536812	-3.12902	0.00633046	0.595287	-2.79674	NETO2	81831
220751_s_at	-0.583932	-0.326147	-3.12666	0.00636215	0.596663	-2.80154	FAXDC2	10826
210544_s_at	0.536071	0.372861	3.12538	0.00637936	0.597573	-2.80415	ALDH3A2	224
227099_s_at	1.30446	1.02878	3.12453	0.00639093	0.597636	-2.80589	C11orf96	387763
206554_x_at	-0.733123	-0.689915	-3.12388	0.00639971	0.598106	-2.80722	SETMAR	6419
205280_at	0.820549	0.451854	3.12377	0.00640121	0.598106	-2.80744	GLRB	2743
220979_s_at	-0.576011	-0.482197	-3.12348	0.00640511	0.598224	-2.80803	ST6GALNAC5	81849
1570588_at	0.370151	0.151104	3.12297	0.00641195	0.598741	-2.80906
225131_at	0.333992	0.249614	3.11859	0.00647171	0.601633	-2.81799	ZRANB1	54764
229050_s_at	0.37507	0.5315	3.11663	0.00649854	0.603481	-2.82198	, SNHG7	84973
232001_at	-0.520942	-0.347134	-3.11376	0.0065381	0.606041	-2.82782	PRKCQ-AS1
201695_s_at	0.357217	0.0720281	3.10777	0.00662148	0.610846	-2.84002	PNP	4860
202948_at	-0.308569	-0.248857	-3.1045	0.00666741	0.613402	-2.84667	IL1R1	3554
1554997_a_at	0.830781	0.966589	3.09085	0.00686244	0.625641	-2.87442	PTGS2	5743
209980_s_at	-0.537574	0.0564477	-3.0902	0.00687192	0.626264	-2.87575	SHMT1	6470, 102466733
204679_at	0.691606	0.629308	3.08828	0.00689984	0.627802	-2.87965	KCNK1	3775
201559_s_at	-0.400288	-0.439387	-3.08765	0.00690909	0.62814	-2.88093	CLIC4	25932
214657_s_at	0.628535	-0.140868	3.08255	0.00698394	0.633679	-2.8913	, NEAT1	283131, 693197
214913_at	-0.464201	0.0982735	-3.08129	0.00700242	0.63447	-2.89384	ADAMTS3	9508
242343_x_at	0.447416	0.162209	3.08048	0.00701446	0.635055	-2.89549
223165_s_at	0.463572	0.292097	3.07715	0.00706404	0.636918	-2.90226	IP6K2	51447
228145_s_at	0.490599	0.537547	3.07702	0.00706584	0.636918	-2.90251	ZNF398	57541
208893_s_at	0.463284	0.418119	3.072	0.00714118	0.641816	-2.91271	DUSP6	1848
228105_at	0.323619	0.410801	3.06874	0.00719044	0.645081	-2.91931
218602_s_at	-0.403532	0.189369	-3.06774	0.00720571	0.645941	-2.92135	HAUS6P3, HAUS6	54801
225843_at	0.39061	0.178941	3.06195	0.00729428	0.650292	-2.93309	ZFYVE19	84936
202911_at	-0.405535	0.0330808	-3.06147	0.00730165	0.650695	-2.93406	MSH6	2956
228843_at	0.704644	0.645494	3.05199	0.00744914	0.65983	-2.95328	ARL10	285598
219825_at	-1.02489	0.508217	-3.05043	0.00747372	0.660978	-2.95644	CYP26B1	56603
225582_at	0.612809	0.537608	3.04768	0.00751713	0.663913	-2.962	ITPRIP	85450
218412_s_at	0.404206	0.474256	3.04629	0.00753922	0.664574	-2.96482	GTF2IRD1	9569
230416_at	0.475054	0.484415	3.03848	0.00766442	0.672378	-2.98063	PDZD8	118987
219080_s_at	-0.299884	-0.326637	-3.03249	0.00776179	0.678065	-2.99275	CTPS2	56474
214287_s_at	0.342898	-0.0839547	3.03206	0.0077688	0.678109	-2.99362
204519_s_at	0.694879	0.663274	3.0292	0.00781571	0.680767	-2.99939	PLLP	51090
228503_at	0.750357	0.391968	3.02546	0.00787759	0.6838	-3.00696	RPS6KA6	27330
229744_at	-0.329941	-0.358883	-3.02292	0.00791988	0.686399	-3.0121	SSFA2	6744
229920_at	0.465479	0.434153	3.02268	0.00792383	0.686399	-3.01258	RBCK1	10616
233348_at	0.335122	-0.0982151	3.02119	0.00794867	0.68787	-3.01558
217529_at	0.414204	0.368825	3.01997	0.00796923	0.689124	-3.01806	ORAI2	80228
212146_at	0.540501	0.343396	3.01901	0.00798536	0.689601	-3.02	PLEKHM2	23207
1552767_a_at	-0.653374	0.224137	-3.01354	0.00807772	0.695063	-3.03103	HS6ST2	90161
213555_at	0.318049	-0.0988543	3.01133	0.0081155	0.69687	-3.0355	RWDD2A	112611
204484_at	0.35877	0.138711	3.00645	0.00819923	0.702336	-3.04534	PIK3C2B	5287
204678_s_at	0.686394	0.675423	3.00176	0.00828064	0.706914	-3.05481	KCNK1	3775
212400_at	0.492424	0.46146	3.00066	0.00829981	0.707605	-3.05703	FAM102A	399665
223474_at	0.724251	0.560581	2.99973	0.008316	0.707939	-3.0589	IRF2BPL	64207
1554132_a_at	0.323501	0.243599	2.99954	0.00831927	0.708085	-3.05927	CCSER2	54462
201860_s_at	-0.963645	0.514265	-2.99748	0.00835544	0.710101	-3.06343	PLAT	5327
201226_at	-0.28316	-0.206014	-2.99626	0.00837694	0.710655	-3.06589	NDUFB8,	4714
209339_at	-0.443364	0.0691195	-2.99516	0.00839638	0.711585	-3.06811	SIAH2	6478
209825_s_at	-0.39295	-0.416202	-2.98405	0.00859488	0.722886	-3.0905	UCK2	7371, 100500832
214729_at	-0.626031	-0.519841	-2.97451	0.00876896	0.732112	-3.1097	TWISTNB	221830
207016_s_at	0.449483	0.320309	2.97033	0.00884619	0.736258	-3.11809	ALDH1A2	8854
224574_at	-0.461238	-0.37097	-2.96969	0.00885819	0.736587	-3.11939	C17orf49, RNASEK-C17orf49	124944
1557119_a_at	0.465712	-0.187081	2.96546	0.00893723	0.74034	-3.12789	ZNF575	284346
207304_at	0.380641	0.321877	2.95716	0.00909434	0.748019	-3.14457	ZNF45	7596
45714_at	-0.45148	0.149329	-2.95685	0.00910018	0.748364	-3.14518	HCFC1R1	54985
201926_s_at	0.460711	0.512056	2.95263	0.00918109	0.752433	-3.15365	CD55	1604
200729_s_at	-0.232313	-0.1923	-2.952	0.00919322	0.752885	-3.15491	ACTR2	10097
238557_at	-0.317094	-0.359036	-2.94785	0.00927373	0.75716	-3.16325	CHKB-AS1	100144603
235103_at	-0.356407	-0.218383	-2.94598	0.00931019	0.759455	-3.167	MAN2A1	4124
218894_s_at	-0.374839	-0.501214	-2.94406	0.0093478	0.761224	-3.17086	MAGOHB	55110
205625_s_at	-0.712416	-0.335469	-2.94242	0.00937999	0.76337	-3.17414	CALB1	793
203822_s_at	0.248964	0.0770206	2.94113	0.00940547	0.764349	-3.17673	ELF2	1998
240259_at	-0.881743	-0.688943	-2.9408	0.00941199	0.764742	-3.1774	FLRT2	23768
233506_at	0.392906	0.0876844	2.93893	0.00944896	0.767016	-3.18114	BZW1	9689
228628_at	-0.344011	0.140373	-2.93713	0.00948461	0.769025	-3.18474	SRGAP2C, SRGAP2B	653464, 647135
212461_at	-0.241291	-0.299163	-2.93221	0.00958303	0.77339	-3.19461	AZIN1	51582
212847_at	-0.38442	-0.369112	-2.93004	0.00962655	0.775799	-3.19894
222879_s_at	-0.538542	-0.431872	-2.92658	0.00969675	0.780077	-3.20588	POLH	5429
213803_at	-0.407592	0.176422	-2.92065	0.00981803	0.787188	-3.21775	KPNB1	3837
227991_x_at	0.355822	0.39491	2.91837	0.009865	0.790019	-3.22231	ZBTB43	23099
242281_at	-0.671469	-0.551448	-2.91641	0.00990551	0.791968	-3.22622	GLUL	2752
219461_at	0.501752	0.36896	2.91538	0.00992702	0.792763	-3.22829	, PAK6	106821730, 56924
219036_at	-0.54856	0.152522	-2.91468	0.00994158	0.793196	-3.22969	CEP70	80321

## Sheet: STE14
AffyIDs	logFC	AveExpr	t	P.Value	adj.P.Val	B	Gene_Symbol	EntrezID
AFFX-HUMRGE/M10098_5_at	1.75551	0.220195	14.2282	1.21197e-10	5.51262e-05	11.3737	MIR3687-1, MIR3687-2	100500815, 103504728
219730_at	1.16024	0.238345	9.64381	3.67973e-08	0.00836859	7.77235	MED18	54797
233874_at	0.964732	0.108797	8.56623	1.89007e-07	0.0286565	6.57064
227931_at	0.680892	0.382127	7.69507	7.86091e-07	0.089388	5.47089	INO80D	54891
215083_at	0.676262	0.125269	7.23018	1.75082e-06	0.159271	4.83336
221650_s_at	0.633044	0.111817	6.40787	7.75182e-06	0.402399	3.61532	MED18	54797
229061_s_at	0.73643	-0.114172	6.09161	1.40798e-05	0.460563	3.11573	SLC25A13	10165
1560622_at	0.802497	0.10734	6.08804	1.41759e-05	0.460563	3.11
243524_at	0.667211	0.350438	5.85186	2.2335e-05	0.522513	2.72561
230703_at	0.643994	0.114086	5.8474	2.25291e-05	0.522513	2.71826
236079_at	0.610273	0.163431	5.45254	4.89837e-05	0.627792	2.05455
233595_at	0.842991	0.380989	5.44538	4.9688e-05	0.627792	2.04227
213998_s_at	0.656771	-0.0250281	5.24532	7.42156e-05	0.664934	1.69626	DDX17	10521
229274_at	0.593807	0.340676	5.08028	0.000103706	0.748741	1.40625
228105_at	0.530664	0.410801	5.03207	0.000114421	0.760585	1.32079
212914_at	0.608998	0.320437	4.7106	0.000221847	0.937518	0.742804	CBX7	23492
242343_x_at	0.680314	0.162209	4.684	0.000234449	0.971704	0.694389
220678_at	-0.415554	-0.158278	-4.6349	0.00025967	1	0.604793
215085_x_at	-0.404907	0.135181	-4.627	0.000263977	1	0.590359	DLEC1	9940
231930_at	-0.758507	0.242661	-4.62665	0.000264171	1	0.589714	ELMOD1	55531, 643923
214475_x_at	0.728119	-0.316447	4.54303	0.00031456	1	0.436407	CAPN3,	825
217097_s_at	0.656172	0.120221	4.46684	0.00036899	1	0.296056	PHTF2	57157
217166_at	-0.355491	-0.232147	-4.35604	0.000465766	1	0.0909139	PTMAP1
1566901_at	0.684004	0.465584	4.3376	0.000484219	1	0.0566586
202082_s_at	0.645058	0.39318	4.30499	0.000518692	1	-0.00399544	SEC14L1	6397
226555_at	0.463336	0.415313	4.30111	0.000522958	1	-0.0112214	INO80D	54891
208003_s_at	0.7135	0.540367	4.27316	0.000554742	1	-0.0632835	NFAT5	10725
240383_at	0.710517	0.557265	4.25047	0.000581992	1	-0.105611	UBE2D3	7323
213489_at	-0.429621	-0.32551	-4.20835	0.000636214	1	-0.184269	MAPRE2	10982
1569453_a_at	-0.33857	0.146237	-4.12769	0.000754787	1	-0.335288
222544_s_at	0.38948	0.124806	4.10228	0.000796596	1	-0.382955	WHSC1L1	54904
204840_s_at	0.56358	-0.212765	4.05559	0.000879636	1	-0.47066	EEA1	8411
1552335_at	-0.489106	-0.186774	-4.04769	0.000894515	1	-0.485501	CATSPER1	117144
226568_at	-0.424456	0.159893	-4.01289	0.0009632	1	-0.550963	FAM102B	284611
201578_at	-0.431399	0.21802	-3.95461	0.00109038	1	-0.660741	PODXL	5420
227415_at	0.354842	0.270391	3.93377	0.00113986	1	-0.700042	DGKH	160851
219221_at	0.391202	0.262933	3.92483	0.00116178	1	-0.716904	ZBTB38	253461
204210_s_at	0.374984	-0.249896	3.91887	0.00117661	1	-0.728141	PCYT1A	5130
213684_s_at	0.460289	0.120394	3.888	0.00125659	1	-0.786386	PDLIM5	10611
207604_s_at	0.471175	0.369587	3.8375	0.00139944	1	-0.881764	SLC4A7	9497
1554287_at	0.711352	-0.0860026	3.80619	0.00149609	1	-0.940928	TRIM4	89122
1554121_at	-0.465629	-0.101866	-3.7945	0.0015339	1	-0.963044	HSD17B12	51144
230442_at	-0.377063	-0.0430596	-3.74332	0.00171091	1	-1.05982	MTHFSD	64779
228082_at	0.443677	0.760625	3.73982	0.00172374	1	-1.06644	CLMP	79827
215790_at	-0.582237	0.264336	-3.71189	0.00182963	1	-1.11927	AJAP1	55966
234989_at	1.05858	0.761148	3.66367	0.002028	1	-1.2105	NEAT1	283131, 693197
235149_at	0.356956	-0.202803	3.65838	0.00205105	1	-1.22051	PGM2L1	283209
228232_s_at	0.369676	-0.11674	3.59603	0.00234309	1	-1.33848	VSIG2	23584
204038_s_at	-0.326946	0.0384529	-3.58632	0.00239216	1	-1.35685	LPAR1	1902
224580_at	0.500504	0.342103	3.55549	0.0025549	1	-1.41517	SLC38A1	81539
230733_at	0.528294	-0.0118118	3.4891	0.00294379	1	-1.54069
227919_at	-0.67951	0.258922	-3.42739	0.00335792	1	-1.65726	, UCA1	652995
212994_at	0.339843	0.18925	3.4161	0.00343972	1	-1.67857	THOC2	57187
238512_at	0.413243	0.524953	3.40286	0.00353817	1	-1.70355	WNT2B	7482
203402_at	0.500275	0.392859	3.39927	0.00356533	1	-1.71032	KCNAB2	8514
202436_s_at	1.14949	2.96377	3.39056	0.0036321	1	-1.72674	CYP1B1	1545
230892_at	0.584605	-0.212859	3.38512	0.00367442	1	-1.737
239903_at	0.468726	0.581032	3.3659	0.00382799	1	-1.77324	TPBG	7162
223217_s_at	0.512524	-0.234873	3.36367	0.00384625	1	-1.77745	NFKBIZ	64332
1565149_at	0.365419	0.0466969	3.34804	0.00397644	1	-1.8069	DYNC2H1	79659
204352_at	0.350895	-0.00511749	3.33995	0.00404547	1	-1.82213	TRAF5	7188
232122_s_at	-0.370334	-0.00200642	-3.33438	0.00409376	1	-1.83263	VEPH1	79674
206214_at	0.602684	-0.336133	3.27488	0.00464603	1	-1.94455	PLA2G7	7941
244133_at	0.342607	0.11425	3.25348	0.00486219	1	-1.98475	USP49	25862
219163_at	0.247576	0.0928009	3.24589	0.00494126	1	-1.99901	ZNF562	54811
227523_s_at	0.23952	-0.0891166	3.22437	0.00517219	1	-2.03937	PHF20L1	51105
224589_at	0.620518	-0.372494	3.20014	0.00544513	1	-2.08479	XIST	7503
217165_x_at	-0.302423	0.138165	-3.18338	0.00564207	1	-2.11617	MT1F	4494
229041_s_at	-0.454445	0.0405415	-3.18202	0.00565832	1	-2.1187	ITGB2-AS1	100505746
235089_at	0.381753	0.321123	3.13872	0.00620187	1	-2.19966	FBXL20	84961
206553_at	-0.504216	-0.621977	-3.11006	0.00658949	1	-2.25313
239331_at	0.672748	0.603579	3.09938	0.00673992	1	-2.27303
213403_at	0.347005	0.725967	3.08651	0.00692565	1	-2.297	MFSD9	84804
243069_at	-0.337374	-0.129684	-3.04857	0.00750299	1	-2.36754
244386_at	0.480336	0.372186	3.04847	0.0075047	1	-2.36774
224984_at	0.361787	0.48405	3.02993	0.00780371	1	-2.40214	, NFAT5	10725
1555606_a_at	0.492609	0.186957	3.02959	0.00780923	1	-2.40276	GDPD1	284161
214287_s_at	-0.339098	-0.0839547	-2.99846	0.00833833	1	-2.46045
243041_s_at	0.593147	-0.678917	2.9979	0.00834812	1	-2.46149
205105_at	0.2503	-0.0967351	2.98523	0.00857357	1	-2.48492	MAN2A1	4124
233723_at	-0.293251	0.00665718	-2.98351	0.00860461	1	-2.4881
222240_s_at	-0.344397	0.257033	-2.97874	0.00869132	1	-2.49692	ISYNA1	51477
205583_s_at	0.371574	-0.0591093	2.97085	0.00883665	1	-2.5115	ALG13	79868
238780_s_at	0.304366	0.244204	2.96454	0.00895436	1	-2.52313	KCNJ5	3762
226204_at	-0.302011	0.147309	-2.96173	0.00900742	1	-2.52832	C22orf29	79680
230494_at	0.88241	0.914821	2.95237	0.00918609	1	-2.54558	SLC20A1	6574
1555733_s_at	0.361096	-0.442527	2.93304	0.00956637	1	-2.58121	AP1S3	130340
1560724_at	-0.317267	0.288927	-2.92151	0.00980024	1	-2.60242	TOR1AIP1	26092
202600_s_at	0.532455	0.633027	2.91887	0.00985455	1	-2.60727	NRIP1	8204
202437_s_at	0.930412	3.17904	2.91557	0.00992306	1	-2.61336	CYP1B1	1545

## Sheet: STE474
AffyIDs	logFC	AveExpr	t	P.Value	adj.P.Val	B	Gene_Symbol	EntrezID
1562102_at	5.11662	2.29653	28.8182	1.81597e-15	6.97122e-10	24.8476
232081_at	3.86207	1.01238	27.8945	3.06529e-15	6.97122e-10	24.42
223437_at	2.09666	0.578918	25.4629	1.32255e-14	1.38412e-09	23.194	PPARA	5465
226834_at	4.93047	1.5612	25.3102	1.45606e-14	1.38412e-09	23.1118	CLMP	79827
204151_x_at	3.46358	1.51993	25.2407	1.52152e-14	1.38412e-09	23.0742	AKR1C1, AKR1C2	1645, 1646
229050_s_at	2.91804	0.5315	24.2473	2.88961e-14	2.19056e-09	22.5207	, SNHG7	84973
1553293_at	-3.34531	-0.830425	-23.3876	5.13812e-14	3.33866e-09	22.0175	MRGPRX3	117195
216548_x_at	-2.55997	-0.621157	-22.0427	1.31771e-13	6.56676e-09	21.1813	HMGB3P1
1559399_s_at	-2.53812	-0.558611	-21.852	1.51249e-13	6.56676e-09	21.0576	ZCCHC10	54819
203524_s_at	1.76803	0.266403	21.8013	1.56933e-13	6.56676e-09	21.0245	MPST	4357
216594_x_at	3.66682	1.60501	21.7849	1.5881e-13	6.56676e-09	21.0138	AKR1C1, AKR1C2	1645, 1646
213403_at	2.36638	0.725967	21.0483	2.73896e-13	9.93741e-09	20.5214	MFSD9	84804
209699_x_at	3.54355	1.50736	21.0001	2.84021e-13	9.93741e-09	20.4885	AKR1C1, AKR1C2	1645, 1646
203744_at	-2.34778	-0.648338	-20.7752	3.3674e-13	1.09404e-08	20.3336	HMGB3	3149
208319_s_at	-2.03228	-0.477806	-20.4951	4.17341e-13	1.26551e-08	20.1378	RBM3	5935
226978_at	2.098	0.56236	20.1697	5.37299e-13	1.45601e-08	19.9063	PPARA	5465
204215_at	2.1084	0.229136	20.1534	5.44185e-13	1.45601e-08	19.8946	TMEM243	79161
211653_x_at	3.4766	1.53109	19.8945	6.67307e-13	1.68624e-08	19.7071	AKR1C1, AKR1C2	1645, 1646
238512_at	2.39687	0.524953	19.7371	7.56295e-13	1.81052e-08	19.5917	WNT2B	7482
228082_at	2.32895	0.760625	19.6311	8.23242e-13	1.87225e-08	19.5134	CLMP	79827
202437_s_at	6.19198	3.17904	19.4034	9.89196e-13	2.14254e-08	19.3434	CYP1B1	1545
200810_s_at	-2.5251	-0.440014	-19.2394	1.13043e-12	2.33715e-08	19.2197	CIRBP	1153
225710_at	-2.05967	-0.628511	-18.5485	2.00719e-12	3.96942e-08	18.6844	GNB4	59345
224150_s_at	2.42476	0.203064	18.3081	2.46229e-12	4.66653e-08	18.4929	CEP70	80321
228949_at	1.84361	0.286209	18.1637	2.78719e-12	5.01065e-08	18.3765	WLS	79971
219268_at	1.63885	0.367203	18.1321	2.86418e-12	5.01065e-08	18.3509	ETNK2	55224
234986_at	2.80463	0.915364	18.0807	2.99419e-12	5.04409e-08	18.3091	GCLM	2730
229744_at	-1.96791	-0.358883	-18.0299	3.12882e-12	5.05729e-08	18.2677	SSFA2	6744
31637_s_at	2.05883	0.482676	17.9953	3.2244e-12	5.05729e-08	18.2394	NR1D1	9572
201468_s_at	2.57607	1.37364	17.8827	3.55674e-12	5.3281e-08	18.1469	NQO1	1728
205626_s_at	-2.13278	-0.444702	-17.8589	3.63134e-12	5.3281e-08	18.1273	CALB1	793
200811_at	-2.63492	-0.530162	-17.4069	5.41757e-12	7.70054e-08	17.749	CIRBP	1153
201617_x_at	-2.57385	-0.933718	-17.371	5.59444e-12	7.71098e-08	17.7185	CALD1	800
219043_s_at	-2.5522	-0.490057	-17.137	6.91004e-12	8.82494e-08	17.5179	PDCL3P5, PDCL3, PDCL3P4, PDCL3P6	79031
206037_at	2.04184	0.331722	17.1259	6.98014e-12	8.82494e-08	17.5083	KYAT1	883
228014_at	-1.42879	-0.337929	-17.1252	6.98469e-12	8.82494e-08	17.5077	PTRH1	138428
204298_s_at	-2.95787	-0.431939	-17.0368	7.5702e-12	9.3062e-08	17.4311	LOX	4015
218995_s_at	-3.15516	-0.89302	-17.005	7.79291e-12	9.32787e-08	17.4035	EDN1	1906
201266_at	2.10477	1.04128	16.7807	9.57873e-12	1.11715e-07	17.2068	TXNRD1	7296
201615_x_at	-2.27976	-0.77833	-16.7344	9.9987e-12	1.13697e-07	17.1658	CALD1	800
202436_s_at	5.66407	2.96377	16.7069	1.02573e-11	1.13793e-07	17.1414	CYP1B1	1545
243976_at	1.8802	0.253641	16.6627	1.06876e-11	1.15744e-07	17.1021	RNF115	27246
219352_at	-2.25306	-0.863958	-16.6359	1.09576e-11	1.15909e-07	17.0783	HERC6	55008
205079_s_at	1.54059	0.183469	16.5375	1.20135e-11	1.2419e-07	16.9903	MPDZ	8777
222668_at	1.77848	0.353753	16.4851	1.26197e-11	1.27557e-07	16.9432	KCTD15	79047
226964_at	1.75057	0.404064	16.413	1.3506e-11	1.33548e-07	16.8781	TTBK2	146057
223294_at	-1.56427	-0.33058	-16.3603	1.41967e-11	1.3684e-07	16.8303	PBDC1	51260
201616_s_at	-2.31529	-0.865631	-16.3423	1.44407e-11	1.3684e-07	16.814	CALD1	800
223486_at	-1.77695	-0.409424	-16.1666	1.70695e-11	1.57563e-07	16.6535	GTPBP8	29083
202831_at	3.05571	1.30977	16.1117	1.79916e-11	1.57563e-07	16.6029	GPX2	2877
202435_s_at	4.89554	2.39609	16.0999	1.81966e-11	1.57563e-07	16.592	CYP1B1	1545
212944_at	1.59181	0.46894	16.0721	1.86896e-11	1.57563e-07	16.5663	SLC5A3	6526
209231_s_at	-1.64174	-0.337146	-16.0609	1.88915e-11	1.57563e-07	16.556	DCTN5	84516
201662_s_at	1.71459	0.486753	16.055	1.89996e-11	1.57563e-07	16.5505	ACSL3	2181
220949_s_at	-2.1099	-0.519797	-16.0521	1.90524e-11	1.57563e-07	16.5478	C7orf49	78996
1555854_at	5.75303	2.28227	16.0232	1.95904e-11	1.59119e-07	16.521	AKR1C1, AKR1C2	1645, 1646
211612_s_at	-1.6338	-0.167801	-15.9384	2.12625e-11	1.6967e-07	16.4422	IL13RA1	3597
219738_s_at	-1.91126	-0.34058	-15.8833	2.24311e-11	1.7591e-07	16.3907	PCDH9	5101
201467_s_at	1.97032	1.19491	15.8482	2.32091e-11	1.78926e-07	16.3578	NQO1	1728
228653_at	1.93372	0.702923	15.7796	2.48174e-11	1.87497e-07	16.2932	SAMD5	389432
228006_at	1.88994	0.348395	15.7661	2.51453e-11	1.87497e-07	16.2806	PTEN	5728
223438_s_at	2.15987	0.517992	15.7268	2.61326e-11	1.89105e-07	16.2434	PPARA	5465
228824_s_at	1.90995	0.708492	15.7187	2.63418e-11	1.89105e-07	16.2357	, PTGR1	22949
202884_s_at	-1.24788	-0.383962	-15.6823	2.72991e-11	1.89105e-07	16.2013	PPP2R1B	5519
203123_s_at	-1.82477	-0.256301	-15.6782	2.74095e-11	1.89105e-07	16.1974	SLC11A2	4891
210589_s_at	-1.51697	-0.103468	-15.6771	2.74398e-11	1.89105e-07	16.1963	GBAP1, GBA	2630, 2629
230314_at	-1.80983	-0.816707	-15.6459	2.82951e-11	1.92089e-07	16.1667
209713_s_at	-1.90262	-0.47576	-15.5584	3.08485e-11	2.06344e-07	16.0832	SLC35D1	23169
201272_at	1.82731	0.493682	15.5352	3.1563e-11	2.08063e-07	16.061	AKR1B1	231
239903_at	2.15486	0.581032	15.474	3.35419e-11	2.1795e-07	16.0022	TPBG	7162
213164_at	1.51422	0.472541	15.3725	3.7113e-11	2.36847e-07	15.9043	SLC5A3	6526
1562745_at	2.36348	0.544218	15.3624	3.74915e-11	2.36847e-07	15.8945
214453_s_at	-3.49625	-1.53918	-15.3236	3.89784e-11	2.42867e-07	15.8568	IFI44	10561
229309_at	3.36457	0.550839	15.2176	4.33614e-11	2.61931e-07	15.7535	ADRB1	153
239358_at	2.83186	0.654972	15.2166	4.34084e-11	2.61931e-07	15.7525
218458_at	1.5288	0.175711	15.2004	4.4124e-11	2.61931e-07	15.7366	GMCL1	64395
231897_at	1.76632	0.674218	15.1955	4.43416e-11	2.61931e-07	15.7318	, PTGR1	22949
226656_at	1.66633	0.299956	15.1419	4.68139e-11	2.68449e-07	15.6792	CRTAP	10491
218498_s_at	-1.90614	-0.239564	-15.1243	4.76579e-11	2.68449e-07	15.6619	ERO1A	30001
210519_s_at	1.82689	1.06142	15.123	4.77169e-11	2.68449e-07	15.6607	NQO1	1728
213528_at	-1.85904	-0.272817	-15.1097	4.83646e-11	2.68449e-07	15.6476	METTL18	92342
218756_s_at	-3.09505	-0.866679	-15.0991	4.88929e-11	2.68449e-07	15.637	DHRS11	79154
226214_at	1.21693	0.26633	15.0876	4.94658e-11	2.68449e-07	15.6257	GDE1	51573
219737_s_at	-1.81262	-0.12327	-15.0854	4.95763e-11	2.68449e-07	15.6235	PCDH9	5101
232323_s_at	1.61536	0.346875	15.0551	5.11275e-11	2.7055e-07	15.5936	TTC17	55761
204972_at	-2.53491	-1.31724	-15.0522	5.12803e-11	2.7055e-07	15.5907	OAS2	4939
219335_at	-1.67336	-0.290555	-15.0433	5.17488e-11	2.7055e-07	15.5819	ARMCX5	64860
200699_at	1.71968	0.318015	15.0172	5.31418e-11	2.74676e-07	15.5561	KDELR2	11014
1554489_a_at	2.08409	0.0820755	14.9607	5.63041e-11	2.86009e-07	15.4999	CEP70	80321
209782_s_at	2.18006	0.14688	14.9557	5.65921e-11	2.86009e-07	15.4949	DBP	1628
209864_at	1.55733	0.244027	14.8533	6.28688e-11	3.14239e-07	15.3926	FRAT2	23401
226702_at	-2.08609	-1.38142	-14.8295	6.44357e-11	3.1857e-07	15.3687	CMPK2	129607
1554342_s_at	-1.55749	-0.227489	-14.7963	6.66807e-11	3.26125e-07	15.3353	HELQ	113510
212410_at	-1.39863	-0.26474	-14.7282	7.15596e-11	3.42636e-07	15.2665	MICU2	221154
203758_at	-2.44988	-0.5147	-14.7173	7.23744e-11	3.42636e-07	15.2555	CTSO	1519
210944_s_at	-1.77948	-0.393416	-14.6882	7.45979e-11	3.42636e-07	15.226	CAPN3,	825
209291_at	-4.21591	-0.78405	-14.6872	7.46703e-11	3.42636e-07	15.2251	ID4	3400
218412_s_at	1.94873	0.474256	14.6866	7.47203e-11	3.42636e-07	15.2244	GTF2IRD1	9569
200737_at	-1.4161	-0.425834	-14.6809	7.51682e-11	3.42636e-07	15.2186	PGK1	5230
219129_s_at	1.8442	0.324141	14.6788	7.53296e-11	3.42636e-07	15.2165	SAP30L	79685
218225_at	1.50581	0.319061	14.6547	7.72438e-11	3.47864e-07	15.1921	ECSIT	51295
210278_s_at	-1.61164	-0.162874	-14.6317	7.91247e-11	3.52841e-07	15.1686	AP4S1	11154
220149_at	-2.46586	-0.269208	-14.6202	8.00742e-11	3.53608e-07	15.157	C2orf54	79919
222595_s_at	-1.38064	-0.289514	-14.6013	8.16728e-11	3.55388e-07	15.1377	DIDO1	11083
1555759_a_at	-4.00185	-0.723659	-14.597	8.204e-11	3.55388e-07	15.1333	CCL5	6352
232315_at	-2.23124	-0.46166	-14.5811	8.34227e-11	3.57969e-07	15.117	ZNF880	400713
227609_at	-3.07494	-1.29872	-14.5286	8.8142e-11	3.74685e-07	15.0633	EPSTI1	94240
214126_at	1.24764	0.19206	14.5002	9.08144e-11	3.79947e-07	15.0341
213306_at	1.83021	0.200662	14.4977	9.10506e-11	3.79947e-07	15.0316	MPDZ	8777
205067_at	1.48738	0.485336	14.4713	9.3625e-11	3.85924e-07	15.0044	IL1B	3553
218986_s_at	-3.26429	-1.46122	-14.4657	9.41798e-11	3.85924e-07	14.9986	DDX60	55601
235289_at	-1.70933	-0.238698	-14.4169	9.91554e-11	4.02684e-07	14.9483	EIF5A2	56648
218602_s_at	1.89095	0.189369	14.3754	1.03611e-10	4.14191e-07	14.9054	HAUS6P3, HAUS6	54801
209380_s_at	1.99284	0.356104	14.3736	1.0381e-10	4.14191e-07	14.9035	ABCC5	10057
221958_s_at	1.75485	0.21241	14.358	1.05541e-10	4.14335e-07	14.8873	WLS	79971
202274_at	-3.79128	-1.19012	-14.3569	1.05668e-10	4.14335e-07	14.8861	ACTG2	72
228771_at	1.74081	0.280912	14.2703	1.15869e-10	4.45355e-07	14.796	GRK3	157
223179_at	1.74069	0.482199	14.2606	1.17067e-10	4.45355e-07	14.7859	YPEL3	83719
227068_at	-1.64293	-0.479689	-14.2591	1.17261e-10	4.45355e-07	14.7843	PGK1	5230
226628_at	1.83997	0.382889	14.2572	1.17495e-10	4.45355e-07	14.7824	THOC2	57187
235296_at	-1.6419	-0.24101	-14.2314	1.20777e-10	4.5401e-07	14.7554	EIF5A2	56648
45288_at	1.63754	0.381162	14.2098	1.23611e-10	4.60856e-07	14.7327	ABHD6	57406
214369_s_at	1.97666	0.323774	14.2011	1.24763e-10	4.61368e-07	14.7236	RASGRP2	10235
238819_at	-1.71606	-0.233685	-14.1828	1.27238e-10	4.66728e-07	14.7044	ZNF347	84671
238557_at	-1.52421	-0.359036	-14.1698	1.29027e-10	4.67481e-07	14.6907	CHKB-AS1	100144603
203124_s_at	-1.81433	-0.269905	-14.1664	1.29499e-10	4.67481e-07	14.6871	SLC11A2	4891
217499_x_at	-1.35622	-0.27947	-14.1508	1.31686e-10	4.69153e-07	14.6707	OR7E38P, OR7E11P, OR7E162P, OR7E12P, OR7E39P, OR7E66P, OR7E36P, OR7E37P, DAPL1, OR7E28P, OR7E33P, OR7E106P	92196
229549_at	1.63372	0.260395	14.1484	1.32026e-10	4.69153e-07	14.6682	CALU	813
230472_at	2.73227	0.458426	14.0831	1.41647e-10	4.95658e-07	14.5993	IRX1	79192
221081_s_at	1.50363	0.475906	14.0829	1.41664e-10	4.95658e-07	14.5992	DENND2D	79961
206756_at	1.55514	0.371096	14.0467	1.47317e-10	5.11502e-07	14.5608	CHST7	56548
235513_at	2.15915	0.692228	14.0334	1.49454e-10	5.14993e-07	14.5467
218219_s_at	-1.64446	-0.299991	-14.0261	1.50645e-10	5.15194e-07	14.5389	LANCL2	55915
217678_at	3.12434	1.57455	14.0078	1.53656e-10	5.2157e-07	14.5195	SLC7A11	23657
213010_at	-2.05974	-0.175901	-13.9908	1.5652e-10	5.25265e-07	14.5014	PRKCDBP	112464
215446_s_at	-2.89031	-0.438311	-13.9876	1.57055e-10	5.25265e-07	14.4981	LOX	4015
233655_s_at	1.88945	0.151117	13.9713	1.59868e-10	5.30771e-07	14.4807	HAUS6	54801
207367_at	-2.43812	-0.356011	-13.9485	1.63888e-10	5.40176e-07	14.4563	ATP12A	479
209921_at	3.0742	1.56538	13.9053	1.71785e-10	5.62131e-07	14.4101	SLC7A11	23657
202501_at	-2.07996	-0.442541	-13.8877	1.75111e-10	5.6544e-07	14.3913	MAPRE2	10982
201578_at	1.51488	0.21802	13.8868	1.75283e-10	5.6544e-07	14.3903	PODXL	5420
233841_s_at	1.22072	0.194865	13.8616	1.80181e-10	5.71866e-07	14.3633	SUDS3	64426
212706_at	2.33927	0.403989	13.8589	1.80711e-10	5.71866e-07	14.3604	, RASA4, RASA4CP	10156, 102724229
203414_at	1.38235	0.220308	13.8572	1.81046e-10	5.71866e-07	14.3585	MMD	23531
240242_at	-1.57807	-0.253825	-13.8107	1.90508e-10	5.97603e-07	14.3085
236640_at	1.33726	0.269567	13.8008	1.9259e-10	5.99996e-07	14.2978	MIR100HG	399959
39402_at	1.40786	0.47092	13.781	1.96833e-10	6.09041e-07	14.2764	IL1B	3553
206191_at	2.10782	0.707398	13.7591	2.01625e-10	6.19655e-07	14.2528	ENTPD3	956
1556613_s_at	-2.0339	-0.391945	-13.7407	2.0575e-10	6.28086e-07	14.2329	DPY19L4	286148
209285_s_at	1.78989	0.313446	13.712	2.12372e-10	6.38893e-07	14.2017	FAM208A	23272
229296_at	2.05267	0.419438	13.7076	2.134e-10	6.38893e-07	14.197	LINC01503	100506119
230275_at	1.49647	0.32036	13.7072	2.13504e-10	6.38893e-07	14.1965	ARSI	340075
218365_s_at	-1.45789	-0.453043	-13.676	2.20977e-10	6.54061e-07	14.1627	DARS2	55157
222455_s_at	-1.54773	-0.231261	-13.6698	2.22519e-10	6.54061e-07	14.1558	PARVA	55742
213144_at	-1.17162	-0.178679	-13.6674	2.23096e-10	6.54061e-07	14.1533	GOSR2	9570
223843_at	1.76332	0.222969	13.6625	2.24324e-10	6.54061e-07	14.1479	SCARA3	51435
226615_at	1.84311	0.285166	13.6251	2.33814e-10	6.77387e-07	14.1071	XPR1	9213
225601_at	-2.62538	-0.476389	-13.6172	2.35871e-10	6.7864e-07	14.0985	HMGB3	3149
229535_at	1.36342	0.264951	13.612	2.3723e-10	6.7864e-07	14.0929	PTPMT1	114971
212704_at	1.14412	0.0656814	13.5692	2.4881e-10	7.07317e-07	14.046	ZCCHC11	23318
226089_at	-1.89152	-0.324174	-13.5542	2.52998e-10	7.14757e-07	14.0295	RABL3	285282
1559827_at	1.37769	0.231615	13.5388	2.57376e-10	7.19102e-07	14.0126	LINC00960	401074
219080_s_at	-1.33875	-0.326637	-13.5377	2.57698e-10	7.19102e-07	14.0114	CTPS2	56474
226224_at	2.07072	0.402213	13.4853	2.73242e-10	7.53093e-07	13.9537	FOXK2	3607
225698_at	2.19951	0.519944	13.4813	2.74474e-10	7.53093e-07	13.9493	EPB41L4A-AS1
226901_at	-1.58328	-0.164305	-13.4801	2.74847e-10	7.53093e-07	13.9479	C17orf58	284018
221927_s_at	-1.19056	-0.0990709	-13.4498	2.84331e-10	7.74417e-07	13.9145	ABHD11	83451
214140_at	-2.02051	-0.398538	-13.4058	2.98757e-10	8.08331e-07	13.8657	SLC25A16	8034
209093_s_at	-1.33182	-0.10872	-13.4011	3.00337e-10	8.08331e-07	13.8605	GBAP1, GBA	2630, 2629
229390_at	1.635	0.401479	13.3919	3.03457e-10	8.11924e-07	13.8504	FAM26F	441168
208964_s_at	3.04903	1.05398	13.3745	3.09452e-10	8.2312e-07	13.8311	FADS1	3992, 100302263
209486_at	-1.45955	-0.243354	-13.367	3.1209e-10	8.25311e-07	13.8227	UTP3	57050
1568812_at	1.81343	0.726719	13.3533	3.16964e-10	8.29017e-07	13.8074		100507140
217933_s_at	-1.6988	-0.616394	-13.3528	3.17136e-10	8.29017e-07	13.8069	LAP3	51056
218723_s_at	3.80368	1.1235	13.3362	3.2315e-10	8.3991e-07	13.7884	RGCC	28984
221988_at	1.64372	0.458466	13.3164	3.30469e-10	8.54052e-07	13.7663	SMIM7	79086
221046_s_at	-1.71294	-0.398791	-13.304	3.35132e-10	8.6121e-07	13.7524	GTPBP8	29083
205414_s_at	1.98611	0.391783	13.29	3.40474e-10	8.70023e-07	13.7368	ARHGAP44	9912
228115_at	2.25443	0.576252	13.2841	3.42757e-10	8.70964e-07	13.7302	GAREM1	64762
225579_at	-2.36611	-0.49096	-13.2663	3.49768e-10	8.83842e-07	13.7103	PQLC3	130814
204364_s_at	-3.10813	-0.57332	-13.2342	3.62766e-10	9.11623e-07	13.6742	REEP1	65055
238669_at	1.59213	0.210794	13.1977	3.78155e-10	9.43438e-07	13.6332	PTGS1	5742
235749_at	-1.80678	-0.288265	-13.1925	3.80409e-10	9.43438e-07	13.6274	UGGT2	55757
203278_s_at	1.39959	0.174604	13.1862	3.83127e-10	9.43438e-07	13.6203	PHF21A	51317
202815_s_at	2.0818	0.284814	13.1822	3.84875e-10	9.43438e-07	13.6158	HEXIM1	10614
206517_at	2.68284	0.493003	13.1703	3.90161e-10	9.43438e-07	13.6024	CDH16	1014
230240_at	1.52317	0.290922	13.1688	3.90844e-10	9.43438e-07	13.6006
239355_at	1.25584	0.216444	13.1661	3.9202e-10	9.43438e-07	13.5977	GMCL1	64395
223427_s_at	-1.73838	-0.458121	-13.1661	3.9202e-10	9.43438e-07	13.5977	EPB41L4B	54566
226341_at	-2.12766	-0.418663	-13.1478	4.00305e-10	9.58305e-07	13.577	OTUD6B-AS1	100506365
238780_s_at	1.34861	0.244204	13.1355	4.05976e-10	9.66793e-07	13.5631	KCNJ5	3762
209679_s_at	-1.1987	-0.287041	-13.1223	4.12179e-10	9.73877e-07	13.5481	SMAGP	57228
215000_s_at	-1.08878	-0.158046	-13.1159	4.15231e-10	9.73877e-07	13.5408	FEZ2	9637
218675_at	1.59081	0.325229	13.1156	4.15374e-10	9.73877e-07	13.5405	, SLC22A17	51310
225802_at	1.61466	0.218127	13.0705	4.37439e-10	1.02035e-06	13.4893	TOP1MT	116447
219377_at	1.8475	0.43852	13.0627	4.41382e-10	1.0243e-06	13.4805	GAREM1	64762
217356_s_at	-1.24174	-0.354754	-13.0312	4.57668e-10	1.0567e-06	13.4446	PGK1	5230
241355_at	2.1846	0.42068	13.0106	4.68655e-10	1.0766e-06	13.4212	HR	55806
235459_at	1.42085	0.230782	13.0026	4.73013e-10	1.08115e-06	13.412	RNF41	10193
202054_s_at	1.9912	0.429496	12.9934	4.78066e-10	1.08724e-06	13.4015	ALDH3A2	224
213461_at	1.23437	0.121445	12.9677	4.92459e-10	1.1144e-06	13.3722	NUDT21	11051
209122_at	2.80336	0.648669	12.9623	4.95552e-10	1.11585e-06	13.366	PLIN2	123
208617_s_at	1.26102	0.291209	12.9575	4.98313e-10	1.11654e-06	13.3605	PTP4A2	8073
218772_x_at	2.10831	0.310227	12.9466	5.04633e-10	1.12145e-06	13.348	TMEM38B	55151
234710_s_at	1.11931	0.134538	12.9453	5.05435e-10	1.12145e-06	13.3465	PARP6	56965
224177_s_at	-1.40203	-0.32146	-12.9313	5.13662e-10	1.1303e-06	13.3305	PBDC1	51260
230004_at	1.54952	0.25171	12.9301	5.14395e-10	1.1303e-06	13.3291	USP24	23358
230913_at	2.19898	0.876861	12.9077	5.27978e-10	1.15457e-06	13.3033
222735_at	2.17743	0.407909	12.8882	5.40071e-10	1.17536e-06	13.2809	TMEM38B	55151
238813_at	1.61911	0.267849	12.8674	5.53297e-10	1.19713e-06	13.2569	APEX2	27301
222896_at	1.64653	0.296186	12.8642	5.55338e-10	1.19713e-06	13.2533	TMEM38A	79041
222664_at	1.63085	0.38347	12.8576	5.5964e-10	1.19928e-06	13.2456	KCTD15	79047
200987_x_at	-1.18206	-0.323714	-12.8546	5.6161e-10	1.19928e-06	13.2421	PSME3	10197
224824_at	-1.65166	-0.525736	-12.8408	5.70682e-10	1.21296e-06	13.2263	COX20P1, COX20	116228
207222_at	2.128	0.349191	12.8004	5.98297e-10	1.26574e-06	13.1795	PLA2G10	8399
204655_at	-4.24388	-0.818791	-12.7791	6.13395e-10	1.29167e-06	13.1548	CCL5	6352
224852_at	1.4846	0.317752	12.7494	6.35113e-10	1.33125e-06	13.1203	TTC17	55761
232170_at	-3.25759	-0.38911	-12.7431	6.39835e-10	1.33481e-06	13.113	S100A7A	338324
221586_s_at	1.36682	0.0841462	12.7366	6.44722e-10	1.33481e-06	13.1054	E2F5	1875
204210_s_at	-1.21861	-0.249896	-12.7354	6.45618e-10	1.33481e-06	13.104	PCYT1A	5130
222443_s_at	-1.09154	-0.237076	-12.7262	6.5262e-10	1.34318e-06	13.0933	RBM8B, RBM8A	9939
224789_at	1.02484	0.172385	12.7088	6.66172e-10	1.3649e-06	13.073	DCAF12	25853
1554010_at	2.08417	0.485107	12.6935	6.7824e-10	1.38339e-06	13.0552
224849_at	1.28419	0.276101	12.6869	6.83521e-10	1.38794e-06	13.0475	TTC17	55761
223408_s_at	1.53259	0.284031	12.6812	6.88166e-10	1.39116e-06	13.0408
205110_s_at	1.56021	0.269433	12.6757	6.92669e-10	1.39407e-06	13.0343	, FGF13	2258
212910_at	1.60143	0.365325	12.67	6.97267e-10	1.39714e-06	13.0277	THAP11	57215
235497_at	3.03484	0.786547	12.6609	7.04848e-10	1.40614e-06	13.017	LINC01128	643837
210904_s_at	-1.51759	-0.160862	-12.6404	7.22065e-10	1.43419e-06	12.9931	IL13RA1	3597
219078_at	-1.34892	-0.120105	-12.629	7.31934e-10	1.44747e-06	12.9796	GPATCH2	55105
222872_x_at	-1.34025	-0.157038	-12.6228	7.37289e-10	1.45175e-06	12.9724	NABP1	64859
213693_s_at	-1.24624	-0.184567	-12.6041	7.53762e-10	1.47228e-06	12.9505	MUC1	4582
231970_at	-1.17309	-0.155503	-12.5996	7.57805e-10	1.47228e-06	12.9452
212077_at	-1.44042	-0.585667	-12.5992	7.58143e-10	1.47228e-06	12.9447	CALD1	800
241754_at	-1.35108	-0.118548	-12.5964	7.6066e-10	1.47228e-06	12.9414	SCAI	286205
1552307_a_at	1.63514	0.13201	12.5925	7.64221e-10	1.4729e-06	12.9368	TTC39C	125488
227655_at	1.66483	0.198891	12.5862	7.69906e-10	1.4776e-06	12.9294	SNHG18
225272_at	1.05985	0.29176	12.5747	7.8057e-10	1.49154e-06	12.9158	SAT2	112483
209853_s_at	-1.15579	-0.322979	-12.5712	7.8378e-10	1.49154e-06	12.9117	PSME3	10197
209733_at	1.51932	0.379162	12.5677	7.87006e-10	1.49154e-06	12.9076
222748_s_at	-1.93412	-0.220192	-12.5612	7.93113e-10	1.49687e-06	12.9	TXNL4B	54957
227111_at	1.24381	0.297059	12.5282	8.24875e-10	1.55039e-06	12.861	ZBTB34	403341
218603_at	1.21767	0.310624	12.4867	8.6672e-10	1.62233e-06	12.8119	HECA	51696
219735_s_at	-1.20239	-0.0866578	-12.4717	8.82398e-10	1.63978e-06	12.7941	TFCP2L1	29842
217837_s_at	-1.31743	-0.297194	-12.4709	8.83252e-10	1.63978e-06	12.7931	CHMP3	51652
230369_at	2.33978	0.565337	12.4606	8.94158e-10	1.65328e-06	12.7809	GPR161	23432
1553978_at	-1.71372	-0.249193	-12.4512	9.04255e-10	1.66518e-06	12.7698	BORCS8	729991
232662_x_at	2.21837	0.427858	12.4387	9.17959e-10	1.67949e-06	12.7548	FAM213A	84293
201857_at	1.2974	0.317033	12.4373	9.1941e-10	1.67949e-06	12.7532	ZFR	51663
209417_s_at	-2.03745	-0.858322	-12.433	9.2419e-10	1.68146e-06	12.7481	IFI35	3430
235282_at	-1.68032	-0.393163	-12.4216	9.36943e-10	1.69788e-06	12.7345		102724532
224711_at	1.76768	0.341912	12.4064	9.54156e-10	1.71955e-06	12.7164	YY1	7528, 102466730
218631_at	1.61934	0.324343	12.402	9.59185e-10	1.71955e-06	12.7112	AVPI1	60370
218025_s_at	1.3112	0.218678	12.4009	9.60503e-10	1.71955e-06	12.7098	ECI2	10455
215724_at	-2.58892	-0.448129	-12.3964	9.65698e-10	1.71955e-06	12.7044	PLD1	5337
230571_at	1.53794	0.398459	12.3946	9.67805e-10	1.71955e-06	12.7023
225252_at	2.04721	0.808149	12.3804	9.84472e-10	1.73305e-06	12.6853	, SRXN1	140809
203816_at	-1.11583	-0.2624	-12.3803	9.84551e-10	1.73305e-06	12.6852	DGUOK	1716
203925_at	1.74037	0.782511	12.3784	9.86833e-10	1.73305e-06	12.6829	GCLM	2730
203153_at	-4.06058	-2.24248	-12.3658	1.00192e-09	1.75277e-06	12.6678	IFIT1	3434
221452_s_at	-1.24821	-0.210469	-12.356	1.01371e-09	1.7623e-06	12.6562	TMEM14DP, TMEM14B	81853
241721_at	1.33526	0.463575	12.3549	1.01512e-09	1.7623e-06	12.6548
201856_s_at	1.31121	0.277062	12.3328	1.04249e-09	1.80294e-06	12.6284	ZFR	51663
217890_s_at	-1.48282	-0.341561	-12.3098	1.07182e-09	1.84246e-06	12.6008	PARVA	55742
215228_at	2.50606	0.40282	12.3086	1.07344e-09	1.84246e-06	12.5993	NHLH2	4808
226452_at	-2.31764	-0.680925	-12.2922	1.09493e-09	1.87227e-06	12.5796	PDK1	5163
219582_at	-1.32897	-0.439573	-12.2611	1.13686e-09	1.9367e-06	12.5422	OGFRL1	79627
226568_at	1.29622	0.159893	12.2547	1.14572e-09	1.94057e-06	12.5345	FAM102B	284611
241353_s_at	1.11313	0.292591	12.2533	1.14766e-09	1.94057e-06	12.5328
223133_at	-1.15155	-0.228612	-12.2461	1.15768e-09	1.95026e-06	12.5242	TMEM14B	81853
227570_at	-1.31132	-0.160325	-12.2361	1.17188e-09	1.96632e-06	12.512	TMEM86A	144110
213283_s_at	1.1159	0.123376	12.23	1.18054e-09	1.96632e-06	12.5047	SALL2	6297
221552_at	1.60372	0.292092	12.2297	1.18101e-09	1.96632e-06	12.5043	ABHD6	57406
226101_at	1.45128	0.272467	12.2273	1.18451e-09	1.96632e-06	12.5014	PRKCE	5581
202220_at	1.41761	0.367508	12.2169	1.19947e-09	1.97507e-06	12.4889	KIAA0907	22889
227565_at	1.31532	0.415653	12.2129	1.20543e-09	1.97507e-06	12.4839
224399_at	-1.30883	-0.596715	-12.2128	1.20551e-09	1.97507e-06	12.4839	PDCD1LG2	80380
230444_at	2.22121	0.529563	12.2117	1.20715e-09	1.97507e-06	12.4825
207469_s_at	2.64793	1.02941	12.2049	1.21718e-09	1.98435e-06	12.4743	PIR	8544
242294_at	1.97843	0.573459	12.1797	1.25511e-09	2.03887e-06	12.4438	FBXO45	200933
235065_at	2.22412	0.56734	12.1736	1.26445e-09	2.04674e-06	12.4364	GAREM1	64762
226388_at	1.75883	0.312885	12.1479	1.30465e-09	2.10431e-06	12.4052	TCEA3	6920
209587_at	1.82499	0.368718	12.1427	1.31295e-09	2.10865e-06	12.3989	PITX1	5307
1554341_a_at	-1.54983	-0.211729	-12.1405	1.3166e-09	2.10865e-06	12.3961	HELQ	113510
1554539_a_at	2.23277	0.800537	12.1341	1.32686e-09	2.11762e-06	12.3884	RHOF	54509
218894_s_at	-1.54322	-0.501214	-12.1208	1.34867e-09	2.14489e-06	12.3722	MAGOHB	55110
225083_at	-1.79123	-0.323129	-12.116	1.3565e-09	2.14984e-06	12.3664	, GTF3C6	112495
1556886_a_at	-1.94664	-0.393789	-12.1103	1.36607e-09	2.15748e-06	12.3594
1552364_s_at	1.55351	0.271993	12.0894	1.40152e-09	2.19366e-06	12.3339	MSI2	124540
218624_s_at	1.14773	0.299601	12.0891	1.40202e-09	2.19366e-06	12.3335	CENPBD1P1,	65996
223950_s_at	1.15629	0.388677	12.0882	1.40345e-09	2.19366e-06	12.3325	FLYWCH1	84256
209737_at	2.17952	0.461104	12.0673	1.43998e-09	2.24306e-06	12.3069	MAGI2	9863
238890_at	1.91496	0.581595	12.0553	1.4613e-09	2.26849e-06	12.2923	BRWD1	54014
224765_at	1.46405	0.283287	12.0491	1.47258e-09	2.27485e-06	12.2846	MSL1	339287
224505_s_at	1.70469	0.297978	12.0475	1.47539e-09	2.27485e-06	12.2827	PLCD4	84812
207847_s_at	-1.36088	-0.13567	-12.0425	1.48461e-09	2.28132e-06	12.2765	MUC1	4582
232875_at	-1.31104	-0.286174	-12.0378	1.49317e-09	2.28675e-06	12.2708	FOCAD	54914
219639_x_at	0.980985	0.199881	12.0348	1.49856e-09	2.28731e-06	12.2672	PARP6	56965
202923_s_at	1.42865	0.582341	12.029	1.50937e-09	2.2961e-06	12.26	GCLC	2729
203069_at	1.50186	0.321945	12.0212	1.52402e-09	2.31067e-06	12.2504	SV2A	9900
209393_s_at	-1.23844	-0.251209	-12.0079	1.54915e-09	2.34096e-06	12.2341	EIF4E2	9470
209825_s_at	-1.58059	-0.416202	-12.003	1.55857e-09	2.34739e-06	12.2281	UCK2	7371, 100500832
222804_x_at	1.62674	0.385451	11.9627	1.63807e-09	2.45899e-06	12.1785	DCAF10	79269
1861_at	1.15665	0.24645	11.9189	1.72929e-09	2.58738e-06	12.1245	BAD	572
222734_at	-1.29934	-0.35369	-11.9118	1.74455e-09	2.59487e-06	12.1157	WARS2	10352
222774_s_at	2.1473	0.128447	11.9105	1.74735e-09	2.59487e-06	12.1141	NETO2	81831
222802_at	-3.06803	-0.882773	-11.9074	1.7541e-09	2.59487e-06	12.1103	EDN1	1906
227534_at	-1.32612	-0.162654	-11.906	1.75711e-09	2.59487e-06	12.1085	AAED1	195827
224619_at	1.15933	0.23211	11.896	1.77907e-09	2.61402e-06	12.0962	CASC4	113201
218374_s_at	-1.55294	-0.293639	-11.8949	1.78157e-09	2.61402e-06	12.0948	C12orf4	57102
225842_at	2.75022	0.995431	11.8714	1.83432e-09	2.68276e-06	12.0656	PHLDA1, NAP1L1	22822, 4673
219215_s_at	-1.48169	-0.181549	-11.8616	1.85674e-09	2.70684e-06	12.0535	SLC39A4	55630
228105_at	1.25019	0.410801	11.855	1.87207e-09	2.72048e-06	12.0453
227941_at	-1.98858	-0.391348	-11.8518	1.87951e-09	2.72259e-06	12.0414		339803
201058_s_at	-2.12006	-0.649576	-11.8427	1.90111e-09	2.74245e-06	12.03	MYL9	10398
210580_x_at	1.10291	0.344622	11.8409	1.90528e-09	2.74245e-06	12.0278	SULT1A4, SLX1B-SULT1A4, SLX1A-SULT1A3, SULT1A3	445329, 105369243, 100526830, 100526831, 6818
225789_at	1.42248	0.235719	11.8357	1.9178e-09	2.75176e-06	12.0212	AGAP3	116988
228152_s_at	-1.97737	-0.675258	-11.8279	1.93643e-09	2.76975e-06	12.0116	DDX60L	91351
220750_s_at	1.79111	0.312081	11.8242	1.9455e-09	2.774e-06	12.0069	P3H1	64175
242003_at	-1.39027	-0.317834	-11.8158	1.96594e-09	2.79439e-06	11.9965
1405_i_at	-4.84378	-1.03049	-11.8124	1.9743e-09	2.79753e-06	11.9923	CCL5	6352
234488_s_at	1.73468	0.131272	11.7673	2.08889e-09	2.95003e-06	11.936	GMCL1, GMCL1P1	64395
219334_s_at	-1.72267	-0.232301	-11.765	2.09489e-09	2.95003e-06	11.9331	NABP1	64859
213183_s_at	2.38952	0.537757	11.7594	2.10969e-09	2.9617e-06	11.9261
202886_s_at	-1.06263	-0.320459	-11.7562	2.11815e-09	2.96442e-06	11.9221	PPP2R1B	5519
233085_s_at	-1.38907	-0.149804	-11.743	2.15345e-09	2.99648e-06	11.9056	NABP1	64859
222471_s_at	1.98085	0.336073	11.7395	2.16303e-09	2.99648e-06	11.9011	KCMF1	56888
213982_s_at	-1.96407	-0.448675	-11.7392	2.16388e-09	2.99648e-06	11.9007	RABGAP1L	9910
212625_at	1.03701	0.27246	11.7379	2.1674e-09	2.99648e-06	11.8991	STX10	8677
37547_at	1.24172	0.11594	11.7313	2.18544e-09	3.00859e-06	11.8908	BBS9	27241
209364_at	1.07797	0.230065	11.7275	2.19589e-09	3.00859e-06	11.8861	BAD	572
228834_at	1.33215	0.39895	11.7274	2.19601e-09	3.00859e-06	11.886
232812_at	-1.54627	-0.288309	-11.7183	2.22136e-09	3.01596e-06	11.8746
225064_at	1.05865	0.165557	11.717	2.22497e-09	3.01596e-06	11.8729	RABEP1	9135
1554538_at	1.55389	0.482573	11.7159	2.22814e-09	3.01596e-06	11.8715	RHOF	54509
229391_s_at	1.13655	0.348477	11.7147	2.23124e-09	3.01596e-06	11.8701	FAM26F	441168
34726_at	1.5716	0.251606	11.7136	2.23454e-09	3.01596e-06	11.8687	CACNB3	784
204760_s_at	2.48517	0.406259	11.6868	2.31105e-09	3.09794e-06	11.835	NR1D1	9572
213233_s_at	-1.58827	-0.347215	-11.6841	2.31883e-09	3.09794e-06	11.8317	KLHL9	55958
221752_at	2.06859	0.452139	11.6838	2.31985e-09	3.09794e-06	11.8312	SSH1	54434
202576_s_at	-0.955433	-0.242042	-11.6829	2.32253e-09	3.09794e-06	11.8301	, DDX19B, DDX19A	11269, 55308
230528_s_at	1.54397	0.400768	11.68	2.33102e-09	3.10018e-06	11.8264	CENPBD1P1	65996
212461_at	-0.960279	-0.299163	-11.6695	2.36212e-09	3.13238e-06	11.8132	AZIN1	51582
227689_at	2.07313	0.371051	11.6568	2.40011e-09	3.17351e-06	11.7973	ZNF227	7770
214023_x_at	2.34181	0.344464	11.6523	2.4139e-09	3.18249e-06	11.7915	TUBB2B	347733
201118_at	1.56058	0.729309	11.6381	2.45762e-09	3.23077e-06	11.7736	PGD	5226
203964_at	-2.2757	-0.723663	-11.6352	2.46662e-09	3.23325e-06	11.77	NMI	9111
227997_at	1.47902	0.334553	11.6274	2.491e-09	3.24748e-06	11.7601	IL17RD	54756
216568_x_at	-1.2735	-0.380345	-11.6272	2.49175e-09	3.24748e-06	11.7598
36936_at	-1.09685	-0.340456	-11.6214	2.50989e-09	3.26177e-06	11.7526	TSTA3	7264
218370_s_at	1.60877	0.271774	11.6191	2.51718e-09	3.26192e-06	11.7497	S100PBP	64766
200697_at	1.35227	0.358844	11.6057	2.56028e-09	3.30835e-06	11.7327	HK1	3098
225191_at	-1.73569	-0.350183	-11.5979	2.5858e-09	3.33186e-06	11.7228	CIRBP	1153
209049_s_at	1.5796	0.406951	11.5914	2.6072e-09	3.34994e-06	11.7146	ZMYND8	23613
207604_s_at	1.42168	0.369587	11.5789	2.64869e-09	3.39367e-06	11.6988	SLC4A7	9497
227059_at	1.66712	0.188742	11.5694	2.68087e-09	3.42525e-06	11.6867	GPC6	10082
222453_at	3.09135	0.334796	11.5536	2.73533e-09	3.48154e-06	11.6666	CYBRD1	79901
222209_s_at	1.29616	0.305009	11.5522	2.74023e-09	3.48154e-06	11.6648	TMEM135	65084
225604_s_at	-2.70567	-0.643305	-11.5255	2.83507e-09	3.59199e-06	11.6308	GLIPR2	152007
227889_at	1.2824	0.140748	11.504	2.91351e-09	3.67673e-06	11.6035	LPCAT2	54947
202269_x_at	-3.01707	-1.45863	-11.5028	2.91811e-09	3.67673e-06	11.6019	GBP1, GBP1P1	2633, 400759
203840_at	-1.2729	-0.118615	-11.4982	2.9351e-09	3.68792e-06	11.5961	BLZF1	8548
217626_at	2.83519	1.02637	11.4921	2.95823e-09	3.70674e-06	11.5883	AKR1C1	1645
225387_at	1.32986	0.239139	11.4889	2.9702e-09	3.71152e-06	11.5842	TSPAN5	10098
225509_at	2.04218	0.291564	11.4847	2.98632e-09	3.72143e-06	11.5788	SAP30L	79685
208615_s_at	1.09856	0.259319	11.481	3.00038e-09	3.7242e-06	11.5741	PTP4A2	8073
222767_s_at	-1.13579	-0.163699	-11.4798	3.00492e-09	3.7242e-06	11.5726	C12orf49	79794
204519_s_at	2.62555	0.663274	11.4456	3.13943e-09	3.88034e-06	11.5288	PLLP	51090
232914_s_at	-1.58726	-0.492876	-11.4393	3.16469e-09	3.90095e-06	11.5208	SYTL2	54843
237145_at	1.57396	0.16723	11.4154	3.26317e-09	4.01148e-06	11.4901	EIF2AK4	440275
224469_s_at	2.85514	0.795968	11.4077	3.29562e-09	4.03923e-06	11.4802	INF2	64423
220643_s_at	-2.15302	-0.304647	-11.4056	3.30451e-09	4.03923e-06	11.4775	FAIM	55179
208963_x_at	2.72606	0.956298	11.4038	3.31238e-09	4.03923e-06	11.4751	FADS1	3992, 100302263
205092_x_at	2.61309	0.559844	11.3954	3.34841e-09	4.07224e-06	11.4643	ZBTB1	22890
227818_at	1.23788	0.22365	11.3878	3.38101e-09	4.09883e-06	11.4546	SH3BGRL3, CEP85	83442, 64793
218325_s_at	-1.5151	-0.247188	-11.3853	3.39209e-09	4.09883e-06	11.4513	DIDO1	11083
219045_at	3.13277	1.06003	11.3841	3.39731e-09	4.09883e-06	11.4498	RHOF	54509
203223_at	1.63379	0.245489	11.3635	3.48835e-09	4.18854e-06	11.4233	RABEP1	9135
212355_at	-1.16193	0.0104069	-11.3631	3.49008e-09	4.18854e-06	11.4228	KHNYN	23351
230394_at	1.11198	0.202299	11.3574	3.5159e-09	4.20843e-06	11.4155	TCP10L,	140290
202296_s_at	-1.13893	-0.216812	-11.3506	3.54675e-09	4.23421e-06	11.4067	RER1	11079
244689_at	1.60938	0.40673	11.3344	3.62194e-09	4.30886e-06	11.3857	PPARA	5465
1555731_a_at	-1.39312	-0.458599	-11.333	3.62823e-09	4.30886e-06	11.384	AP1S3	130340
221900_at	2.14987	0.583399	11.323	3.67566e-09	4.35041e-06	11.371	COL8A2	1296
224566_at	-1.8239	-0.21029	-11.3216	3.68234e-09	4.35041e-06	11.3691	NEAT1	283131, 693197
243000_at	-1.52572	-0.305109	-11.3167	3.70581e-09	4.36679e-06	11.3628	CDK6	1021
219534_x_at	2.48093	0.577444	11.3142	3.71753e-09	4.36929e-06	11.3596	CDKN1C	1028
231227_at	1.93866	0.547572	11.3069	3.75275e-09	4.39931e-06	11.3502
202780_at	-1.62222	-0.530905	-11.3035	3.76944e-09	4.40542e-06	11.3457	OXCT1	5019
209008_x_at	-1.56707	-0.438949	-11.3018	3.77768e-09	4.40542e-06	11.3435	KRT8P3, KRT8	3856
230416_at	1.76669	0.484415	11.2999	3.78702e-09	4.40542e-06	11.3411	PDZD8	118987
222240_s_at	1.30566	0.257033	11.2928	3.82173e-09	4.42843e-06	11.3319	ISYNA1	51477
210609_s_at	-1.82736	-0.167425	-11.2919	3.82627e-09	4.42843e-06	11.3308	TP53I3	9540
214430_at	2.10426	0.510909	11.2889	3.84116e-09	4.43364e-06	11.3269	GLA	2717
236140_at	1.91198	0.738027	11.2871	3.85026e-09	4.43364e-06	11.3245	GCLM	2730
211975_at	-1.48207	-0.213005	-11.281	3.88093e-09	4.45767e-06	11.3165	ARFGAP2	84364
218802_at	-1.58188	-0.561273	-11.2753	3.90924e-09	4.47887e-06	11.3093	CCDC109B	55013
238569_at	-1.49678	-0.14023	-11.2458	4.06178e-09	4.64195e-06	11.2709	GABBR1	2550
33307_at	-1.64331	-0.391988	-11.2332	4.12921e-09	4.70718e-06	11.2544	RRP7A, RRP7BP	27341, 91695
229342_at	1.93108	0.33003	11.2304	4.14427e-09	4.71253e-06	11.2508	NCBP3	55421
203775_at	-1.86788	-0.339227	-11.2217	4.1913e-09	4.75413e-06	11.2395	SLC25A13	10165
209791_at	-1.30069	-0.192929	-11.2152	4.22673e-09	4.7808e-06	11.231	PADI2	11240
1560724_at	1.21776	0.288927	11.2136	4.23583e-09	4.7808e-06	11.2289	TOR1AIP1	26092
200070_at	-0.949987	-0.0748287	-11.1926	4.35278e-09	4.89146e-06	11.2016	CNPPD1	27013
213694_at	1.19755	0.162767	11.1922	4.35539e-09	4.89146e-06	11.201	RSBN1	54665
201623_s_at	-1.28525	-0.30418	-11.1881	4.37851e-09	4.90532e-06	11.1957	DARS	1615
224443_at	-2.51689	-0.461571	-11.1653	4.51109e-09	5.04143e-06	11.1658	LINC00467
227420_at	1.36987	-0.055624	11.1624	4.52803e-09	5.04796e-06	11.162	TNFAIP8L1	126282
232184_at	-2.40109	-0.412307	-11.1559	4.56643e-09	5.05786e-06	11.1536	ALS2	57679
217828_at	0.931077	0.290303	11.1554	4.56944e-09	5.05786e-06	11.1529	SLTM	79811
202854_at	-1.60929	-0.476152	-11.1536	4.58004e-09	5.05786e-06	11.1506	HPRT1	3251
201660_at	1.42577	0.422544	11.1534	4.58139e-09	5.05786e-06	11.1503	ACSL3	2181
218657_at	1.35249	0.29994	11.1513	4.59398e-09	5.05948e-06	11.1475	RAPGEFL1	51195
229061_s_at	-1.34698	-0.114172	-11.1419	4.65069e-09	5.10957e-06	11.1352	SLC25A13	10165
218696_at	1.36242	0.385379	11.1337	4.70103e-09	5.14149e-06	11.1244	EIF2AK3	9451
228092_at	-1.62583	-0.280116	-11.1335	4.70236e-09	5.14149e-06	11.1242	CREM	1390
201554_x_at	-1.80026	-0.439955	-11.1234	4.76469e-09	5.19715e-06	11.111	GYG1	2992
218321_x_at	-1.1243	-0.273193	-11.1091	4.8549e-09	5.27465e-06	11.0921	STYXL1	51657
213501_at	-2.0501	-0.480829	-11.108	4.86179e-09	5.27465e-06	11.0907	ACOX1	51
1553715_s_at	1.62618	0.248324	11.1067	4.87053e-09	5.27465e-06	11.0889	MCRIP2	84331, 100287175
226364_at	1.37702	0.0727379	11.1017	4.90216e-09	5.2963e-06	11.0824	HIP1	3092
213574_s_at	1.42582	0.150029	11.0967	4.93492e-09	5.31905e-06	11.0758	KPNB1	3837
223946_at	-1.53673	-0.389576	-11.0921	4.96437e-09	5.33815e-06	11.0698	MED23	9439
228843_at	2.56022	0.645494	11.0889	4.98512e-09	5.34781e-06	11.0656	ARL10	285598
203212_s_at	-1.0448	-0.271713	-11.0871	4.99732e-09	5.34829e-06	11.0632	MTMR2	8898
203409_at	1.49209	0.117237	11.0726	5.09339e-09	5.43831e-06	11.0441	DDB2	1643
223358_s_at	1.77259	0.526787	11.0662	5.13623e-09	5.4712e-06	11.0357	PDE7A	5150
203390_s_at	2.34795	0.464114	11.0636	5.154e-09	5.47554e-06	11.0322	KIF3C	3797
200698_at	1.00323	0.195472	11.0619	5.16522e-09	5.47554e-06	11.03	KDELR2	11014
223389_s_at	1.3462	0.205008	11.0603	5.17641e-09	5.47554e-06	11.0278	ZNF581	51545
213995_at	-1.86985	-0.468856	-11.058	5.19201e-09	5.47614e-06	11.0248	ATP5S	27109
218462_at	-1.07701	-0.226011	-11.0567	5.20106e-09	5.47614e-06	11.0231	RPF1	80135
1557073_s_at	1.51379	0.312732	11.0419	5.30347e-09	5.57107e-06	11.0035	TTBK2	146057
230205_at	-1.5426	-0.265303	-11.0352	5.35015e-09	5.60716e-06	10.9947	ZNF561	93134
227426_at	1.01159	0.194809	11.0304	5.38411e-09	5.61728e-06	10.9884	SOS1	6654
225335_at	1.45172	0.223519	11.0298	5.38866e-09	5.61728e-06	10.9875	ZNF496	84838
236514_at	-2.04795	-0.312689	-11.0286	5.39685e-09	5.61728e-06	10.986	ACOT8	10005
238109_at	1.18383	0.211967	11.0246	5.42531e-09	5.634e-06	10.9807
53912_at	-1.03305	-0.196596	-11.0164	5.48422e-09	5.68221e-06	10.9699	SNX11	29916
210650_s_at	-1.29912	0.0278434	-11.0098	5.5326e-09	5.7193e-06	10.9611	PCLO	27445
225375_at	-1.1432	-0.165522	-10.9921	5.66305e-09	5.84088e-06	10.9377	TMEM199	147007, 100616388
203074_at	-1.143	-0.242611	-10.9896	5.68245e-09	5.84763e-06	10.9343	ANXA8L1, ANXA8	643650, 728113, 653145
202242_at	2.98419	0.995392	10.9875	5.69823e-09	5.84807e-06	10.9315	, TSPAN7	7102
240310_at	1.16739	0.314465	10.9861	5.70859e-09	5.84807e-06	10.9297	TOR1AIP1	26092
213558_at	-1.62055	-0.0140879	-10.9817	5.7417e-09	5.86877e-06	10.9239	PCLO	27445
228906_at	1.96645	0.21706	10.98	5.75485e-09	5.86902e-06	10.9216	TET1	80312
217889_s_at	2.37288	0.229299	10.9757	5.78739e-09	5.88692e-06	10.9159	CYBRD1	79901
213630_at	2.01771	0.33908	10.9734	5.80491e-09	5.88692e-06	10.9129	NACAD	23148
227091_at	1.2141	0.146579	10.9726	5.81122e-09	5.88692e-06	10.9118	CCDC146	57639
212872_s_at	-1.21582	-0.385756	-10.9684	5.84375e-09	5.90671e-06	10.9062	MED20	9477
221614_s_at	1.06945	0.191804	10.957	5.93235e-09	5.98297e-06	10.8911	RPH3AL	9501
200738_s_at	-0.980465	-0.257374	-10.9536	5.95938e-09	5.99694e-06	10.8865	PGK1	5230
218404_at	-2.15174	-0.417655	-10.9311	6.14008e-09	6.16513e-06	10.8565	SNX10	29887
202606_s_at	1.23804	0.405765	10.9134	6.28594e-09	6.29768e-06	10.833	TLK1	9874
230370_x_at	-1.2219	-0.29656	-10.9116	6.30132e-09	6.29922e-06	10.8305	STYXL1	51657
1553400_a_at	1.36457	0.454852	10.909	6.32292e-09	6.30695e-06	10.8271	CRHR1-IT1	147081, 401884
219459_at	-1.79263	-0.388828	-10.8997	6.40127e-09	6.37113e-06	10.8147	POLR3B	55703
223032_x_at	-0.943387	-0.172203	-10.8951	6.44096e-09	6.38783e-06	10.8085	PRELID1,	27166
221556_at	1.2468	0.136516	10.8945	6.44614e-09	6.38783e-06	10.8077	CDC14B	8555
230361_at	-1.88659	-0.150947	-10.8927	6.46115e-09	6.38879e-06	10.8054	MROH1	727957
222791_at	1.201	0.285295	10.877	6.59835e-09	6.5103e-06	10.7843	RSBN1	54665
208718_at	1.076	0.253518	10.8679	6.6783e-09	6.57492e-06	10.7722	DDX17	10521
231406_at	1.16535	0.302025	10.8496	6.84362e-09	6.71838e-06	10.7476	ORAI2	80228
201888_s_at	-1.47595	-0.12556	-10.8483	6.85561e-09	6.71838e-06	10.7459	IL13RA1	3597
235099_at	1.45064	0.200778	10.8469	6.86832e-09	6.71838e-06	10.744	CMTM8	152189
217736_s_at	1.09073	0.153474	10.8388	6.9435e-09	6.77734e-06	10.7331	EIF2AK1	27102
232353_s_at	-1.14895	-0.264586	-10.8298	7.02701e-09	6.84416e-06	10.721	STYXL1	51657
201061_s_at	1.27211	0.093192	10.8199	7.12067e-09	6.91552e-06	10.7077	STOM	2040
236778_at	0.991842	0.151137	10.8189	7.13068e-09	6.91552e-06	10.7063
224636_at	0.886618	0.194391	10.8168	7.1504e-09	6.91989e-06	10.7036	ZFP91	80829
228235_at	-3.22762	-0.853403	-10.7972	7.34038e-09	7.08867e-06	10.6772	MIR503HG	84848, 494336
203595_s_at	-1.97983	-0.674017	-10.7886	7.42595e-09	7.15611e-06	10.6656	IFIT5	24138
205031_at	1.38511	0.211683	10.7866	7.44516e-09	7.15945e-06	10.663	EFNB3	1949
208962_s_at	3.56811	1.10586	10.7822	7.48974e-09	7.18713e-06	10.657	FADS1	3992, 100302263
221856_s_at	-1.32	-0.266698	-10.7787	7.52467e-09	7.20544e-06	10.6523	FAM63A	55793
220751_s_at	-2.01272	-0.326147	-10.7771	7.54092e-09	7.20583e-06	10.6501	FAXDC2	10826
203218_at	1.02155	0.128173	10.7705	7.60819e-09	7.25487e-06	10.6412	MAPK9	5601
201559_s_at	-1.39572	-0.439387	-10.766	7.65441e-09	7.28367e-06	10.6351	CLIC4	25932
237333_at	1.90254	0.297417	10.7596	7.72003e-09	7.33078e-06	10.6266	RBBP4	5928
223878_at	-1.71839	-0.0555251	-10.7511	7.80952e-09	7.40031e-06	10.615	INPP4B	8821
225258_at	1.69222	0.47998	10.7478	7.84397e-09	7.4175e-06	10.6105	FBLIM1	54751
1554287_at	-2.00799	-0.0860026	-10.744	7.88379e-09	7.43969e-06	10.6055	TRIM4	89122
227801_at	-1.87918	-0.62301	-10.7323	8.0093e-09	7.54248e-06	10.5896	TRIM59	286827
1555734_x_at	-1.24242	-0.367741	-10.7263	8.07463e-09	7.58829e-06	10.5814	AP1S3	130340
204730_at	-1.62843	-0.1743	-10.7207	8.13523e-09	7.62947e-06	10.5739	RIMS3	9783
226204_at	1.09281	0.147309	10.7169	8.1776e-09	7.65343e-06	10.5687	C22orf29	79680
201644_at	-1.08384	-0.314664	-10.7126	8.22493e-09	7.68193e-06	10.5629	TSTA3	7264
204113_at	1.79886	0.260969	10.7109	8.24313e-09	7.68315e-06	10.5607	CELF1	10658
202591_s_at	-1.12749	-0.259456	-10.6983	8.38507e-09	7.79946e-06	10.5435	SSBP1	6742
222646_s_at	-1.41748	-0.161539	-10.6894	8.486e-09	7.87723e-06	10.5315	ERO1A	30001
201998_at	1.45483	0.0841921	10.6854	8.53244e-09	7.89466e-06	10.526	ST6GAL1	6480
226603_at	-2.42483	-0.795233	-10.6848	8.53949e-09	7.89466e-06	10.5252	SAMD9L	219285
227148_at	1.45593	0.150054	10.6798	8.59641e-09	7.93116e-06	10.5185	PLEKHH2	130271
238935_at	-2.32036	-0.550037	-10.6782	8.61601e-09	7.93315e-06	10.5162	RPS27L	51065
218243_at	1.01031	0.16631	10.6644	8.77766e-09	8.06567e-06	10.4975	RUFY1	80230
217999_s_at	2.02416	0.744124	10.6606	8.8236e-09	8.09153e-06	10.4922	PHLDA1, NAP1L1	22822, 4673
219998_at	-1.66577	-0.48941	-10.635	9.13402e-09	8.35935e-06	10.4575	LGALSL	29094
228754_at	3.7515	1.07618	10.6323	9.16842e-09	8.37398e-06	10.4537	SLC6A6	6533
242218_at	-2.16973	-0.169764	-10.6294	9.20345e-09	8.38912e-06	10.4499
1554360_at	1.28288	0.330919	10.6199	9.32336e-09	8.48143e-06	10.4368	FCHSD2	9873
209589_s_at	1.36095	0.145862	10.608	9.47524e-09	8.60239e-06	10.4206	EPHB2	2048
229843_at	-1.42283	-0.225068	-10.6037	9.53133e-09	8.63608e-06	10.4147	RMDN1	51115
213573_at	1.11393	0.0959487	10.5947	9.64791e-09	8.72433e-06	10.4024	KPNB1	3837
208920_at	-2.13596	-0.621749	-10.5919	9.68434e-09	8.73989e-06	10.3986	SRI	6717
1554053_at	-2.0463	-0.161882	-10.5864	9.75753e-09	8.78851e-06	10.3911	SPTLC1	10558
223487_x_at	-1.1823	-0.565875	-10.5751	9.90828e-09	8.90665e-06	10.3756	GNB4	59345
1560407_at	-1.64574	-0.372647	-10.5706	9.96917e-09	8.94145e-06	10.3695
222437_s_at	-1.32515	-0.334799	-10.5694	9.98631e-09	8.94145e-06	10.3677	CHMP3	51652
207016_s_at	1.59847	0.320309	10.5632	1.0071e-08	8.99955e-06	10.3593	ALDH1A2	8854
232683_s_at	1.16563	0.194117	10.5553	1.01792e-08	9.07843e-06	10.3485	PARP6	56965
1558692_at	2.07606	0.552092	10.5427	1.03557e-08	9.21362e-06	10.3312	GLMP	112770
223217_s_at	-1.60623	-0.234873	-10.5416	1.03713e-08	9.21362e-06	10.3297	NFKBIZ	64332
212785_s_at	-1.28143	-0.292232	-10.539	1.04082e-08	9.22745e-06	10.3261	LARP7	51574
209600_s_at	-1.87524	-0.452534	-10.5377	1.04275e-08	9.22745e-06	10.3243	ACOX1	51
201328_at	1.65487	0.331384	10.5273	1.05761e-08	9.33248e-06	10.31	ETS2	2114
1554256_a_at	1.24791	0.370873	10.5266	1.05872e-08	9.33248e-06	10.309	PCNX2	80003
217818_s_at	-1.20297	-0.220368	-10.5225	1.06463e-08	9.36643e-06	10.3034	ARPC4	10093
224718_at	1.74595	0.327358	10.514	1.07707e-08	9.45761e-06	10.2917	YY1	7528, 102466730
231990_at	-2.33253	-0.39587	-10.5105	1.08222e-08	9.48451e-06	10.2869	USP15	9958, 102465133
222122_s_at	0.937254	0.198424	10.5064	1.08829e-08	9.51937e-06	10.2812	THOC2	57187
219720_s_at	-1.29273	-0.182189	-10.5048	1.0907e-08	9.52212e-06	10.279	GPATCH2L	55668
218556_at	-1.44319	-0.202542	-10.5008	1.09675e-08	9.55658e-06	10.2734	ORMDL2	29095
218093_s_at	1.67726	0.293266	10.4789	1.13006e-08	9.81636e-06	10.2433	ANKRD10	55608
223031_s_at	1.07351	0.160393	10.4777	1.13191e-08	9.81636e-06	10.2417	TRAF7	84231
206770_s_at	-1.37539	-0.296639	-10.4752	1.13579e-08	9.81636e-06	10.2382	SLC35A3	23443
209230_s_at	3.67746	0.791654	10.475	1.13617e-08	9.81636e-06	10.2379	NUPR1	26471
209293_x_at	-1.17303	-0.212401	-10.4742	1.13735e-08	9.81636e-06	10.2369	ID4	3400
203502_at	-2.50729	-0.404382	-10.4719	1.14095e-08	9.82881e-06	10.2337	BPGM	669
201016_at	-1.05316	-0.301698	-10.4699	1.14415e-08	9.83769e-06	10.2309	EIF1AXP1, EIF1AX	1964
202946_s_at	0.884817	0.189663	10.4679	1.14718e-08	9.84516e-06	10.2282	BTBD3	22903
225750_at	-1.62506	-0.246843	-10.4614	1.15758e-08	9.91572e-06	10.2191	ERO1A	30001
226267_at	1.50191	0.0910263	10.459	1.16142e-08	9.92041e-06	10.2158	JDP2	122953
237465_at	-1.37318	-0.088551	-10.4583	1.16249e-08	9.92041e-06	10.2148	USP53	54532
201661_s_at	1.31479	0.359648	10.436	1.19858e-08	1.02092e-05	10.1841	ACSL3	2181
215081_at	1.39801	0.372007	10.432	1.20532e-08	1.02449e-05	10.1784	KIAA1024	23251
236458_at	1.28611	0.392413	10.4308	1.20727e-08	1.02449e-05	10.1768
227907_at	1.31964	0.152081	10.4281	1.21175e-08	1.02637e-05	10.1731	TUBGCP4	27229
200726_at	1.06268	0.0746036	10.424	1.21865e-08	1.0303e-05	10.1673	PPP1CC	5501
223833_at	1.15111	0.304613	10.4172	1.23001e-08	1.03798e-05	10.158	WDR55	54853
205084_at	-0.978714	-0.119765	-10.4138	1.23583e-08	1.04095e-05	10.1533	BCAP29	55973
228628_at	1.21953	0.140373	10.4122	1.23849e-08	1.04127e-05	10.1511	SRGAP2C, SRGAP2B	653464, 647135
224663_s_at	-1.1795	-0.235361	-10.4092	1.24369e-08	1.04225e-05	10.1469	CFL2	1073
215299_x_at	1.08712	0.257404	10.4089	1.24424e-08	1.04225e-05	10.1464	SULT1A2, SULT1A4, SULT1A1, SULT1A3	6799, 445329, 105369243, 6817, 6818
208510_s_at	1.96663	0.376462	10.4066	1.24811e-08	1.04357e-05	10.1433	PPARG	5468
222333_at	-1.05226	-0.0776718	-10.4021	1.25584e-08	1.04649e-05	10.1371	ALS2CL	259173
1557293_at	1.3499	0.358994	10.4019	1.25621e-08	1.04649e-05	10.1368	LINC00969, MIR570	693155
1555894_s_at	1.13153	0.13405	10.39	1.27708e-08	1.06194e-05	10.1202	MTSS1L	92154
227525_at	1.56086	0.414847	10.3622	1.32698e-08	1.10142e-05	10.0816	GLCCI1	113263
210434_x_at	0.903169	0.172936	10.3468	1.3556e-08	1.12312e-05	10.0601	JTB	10899
209029_at	-1.03707	-0.178221	-10.3432	1.36249e-08	1.12536e-05	10.055	COPS7A	50813
235627_at	-1.38833	-0.128047	-10.3427	1.36326e-08	1.12536e-05	10.0544	PFN4	375189
221679_s_at	1.53121	0.169046	10.3378	1.37271e-08	1.13075e-05	10.0475	ABHD6	57406
228274_at	-1.70736	-0.329623	-10.3358	1.37651e-08	1.13075e-05	10.0447	SDSL	113675
223468_s_at	1.18508	0.11817	10.3354	1.37724e-08	1.13075e-05	10.0441	RGMA	56963
212621_at	1.43005	0.12175	10.3331	1.38154e-08	1.13224e-05	10.041	NEMP1	23306
1557038_s_at	-1.63734	-0.284268	-10.3287	1.38999e-08	1.13634e-05	10.0349	UBAC2-AS1	100289373
209233_at	-1.53427	-0.304863	-10.3279	1.39155e-08	1.13634e-05	10.0337	, EMG1	10436
209824_s_at	1.68633	0.452836	10.3232	1.40068e-08	1.14175e-05	10.0271	ARNTL	406
229450_at	-3.50089	-1.6798	-10.3205	1.40588e-08	1.14394e-05	10.0234	IFIT3	3437
202555_s_at	-3.29222	-1.49262	-10.3186	1.40962e-08	1.14493e-05	10.0207	MYLK	4638
220413_at	-2.92422	-0.52178	-10.3141	1.41857e-08	1.15015e-05	10.0144	SLC39A2	29986
224579_at	1.10367	0.350922	10.3067	1.43303e-08	1.15844e-05	10.0041	SLC38A1	81539
228950_s_at	1.5838	0.0782189	10.3063	1.43388e-08	1.15844e-05	10.0035	WLS	79971
218486_at	1.56009	0.371713	10.3048	1.43682e-08	1.15875e-05	10.0015	KLF11	8462
230657_at	2.5354	0.610719	10.2966	1.45339e-08	1.16935e-05	9.98992	TMEM165	55858
1554097_a_at	1.92991	0.763956	10.2948	1.45706e-08	1.16935e-05	9.98737	MIR31HG
219288_at	-1.72907	-0.423674	-10.2926	1.46144e-08	1.16935e-05	9.98435	C3orf14	57415
210611_s_at	-1.38615	-0.263589	-10.292	1.46276e-08	1.16935e-05	9.98344	DTNA	1837
223452_s_at	-1.51803	-0.274987	-10.2919	1.46281e-08	1.16935e-05	9.9834	ATL3	25923
207064_s_at	1.8747	0.321373	10.2823	1.48264e-08	1.18311e-05	9.96984	AOC2	314
224761_at	1.09361	0.304396	10.2805	1.48621e-08	1.18389e-05	9.96742	GNA13	10672
219543_at	-1.57995	-0.419085	-10.2782	1.49101e-08	1.18563e-05	9.96417	PBLD	64081
216623_x_at	3.42707	0.50276	10.2736	1.50052e-08	1.19112e-05	9.95776	TOX3	27324
201904_s_at	1.15381	0.108766	10.2715	1.50493e-08	1.19171e-05	9.9548	CTDSPL	10217
209118_s_at	-1.79044	-0.70728	-10.2695	1.50908e-08	1.19171e-05	9.95203	TUBA1A	7846
1554045_at	-1.70394	-0.278719	-10.2695	1.50913e-08	1.19171e-05	9.95199	ZNF24	7572
200853_at	1.1862	0.0405762	10.2677	1.51304e-08	1.19273e-05	9.94938	H2AFZ	3015
228232_s_at	-1.05539	-0.11674	-10.2663	1.51586e-08	1.19289e-05	9.94751	VSIG2	23584
232297_at	1.29411	0.395858	10.2616	1.52596e-08	1.19876e-05	9.94081
226647_at	1.40538	0.194643	10.2577	1.53418e-08	1.20043e-05	9.9354	TMEM25	84866
224725_at	1.06916	0.194509	10.2572	1.53517e-08	1.20043e-05	9.93475	MIB1	57534
225516_at	-2.62831	-0.43753	-10.2566	1.53652e-08	1.20043e-05	9.93387	SLC7A2	6542
224783_at	1.49966	0.502208	10.2556	1.53864e-08	1.20043e-05	9.93248	UBALD2	283991
205406_s_at	-1.52511	-0.469925	-10.2512	1.54809e-08	1.20573e-05	9.92631	SPA17	53340
213018_at	0.875507	0.25555	10.2404	1.57154e-08	1.2219e-05	9.91115	GATAD1	57798
201611_s_at	0.96375	0.0298559	10.2391	1.5744e-08	1.22195e-05	9.90932	ICMT	23463
224984_at	1.22246	0.48405	10.238	1.57698e-08	1.22195e-05	9.90767	, NFAT5	10725
201906_s_at	1.44419	0.190582	10.2358	1.58175e-08	1.22357e-05	9.90462	CTDSPL	10217
228963_at	1.33881	0.128442	10.234	1.58581e-08	1.22463e-05	9.90204	RSBN1L	222194
229231_at	1.05633	0.275603	10.2311	1.59205e-08	1.22736e-05	9.89808	LRRC37BP1, LRRC37B	114659
226454_at	1.28421	0.201058	10.2287	1.59741e-08	1.22941e-05	9.89469	MARCH9	92979
202911_at	1.3544	0.0330808	10.2247	1.60653e-08	1.23434e-05	9.88895	MSH6	2956
228145_s_at	1.62981	0.537547	10.2221	1.61222e-08	1.23662e-05	9.88539	ZNF398	57541
231577_s_at	-2.86233	-1.45828	-10.2196	1.61793e-08	1.23891e-05	9.88183	GBP1	2633
226269_at	-2.09369	-0.516953	-10.2095	1.64088e-08	1.25323e-05	9.86763	GDAP1	54332
205687_at	1.03433	0.288666	10.209	1.64214e-08	1.25323e-05	9.86685	UBFD1	56061
38037_at	3.31576	1.2147	10.2075	1.64555e-08	1.25373e-05	9.86477	HBEGF	1839
229377_at	1.65071	0.169675	10.1975	1.6688e-08	1.26932e-05	9.85062	GRTP1	79774
240353_s_at	-1.44606	-0.588362	-10.1899	1.68651e-08	1.28064e-05	9.83998	C12orf54	121273
213803_at	1.42152	0.176422	10.186	1.69572e-08	1.28268e-05	9.83449	KPNB1	3837
212810_s_at	1.67587	0.38261	10.1855	1.69696e-08	1.28268e-05	9.83375	SLC1A4	6509
226875_at	1.88942	0.403743	10.1852	1.69765e-08	1.28268e-05	9.83334	DOCK11	139818
201106_at	1.24066	0.223402	10.1691	1.73637e-08	1.30976e-05	9.8106	GPX4	2879
213107_at	1.46596	0.355624	10.1663	1.74335e-08	1.31284e-05	9.80656	TNIK	23043
202272_s_at	-0.981396	-0.12371	-10.1649	1.74675e-08	1.31324e-05	9.80459	FBXO28	23219
240119_at	-1.52447	-0.436367	-10.1492	1.78554e-08	1.34019e-05	9.78244	TEPP	374739
219633_at	-1.49203	-0.254964	-10.146	1.79353e-08	1.34396e-05	9.77794	TTPAL	79183
218003_s_at	-0.881869	-0.285756	-10.1434	1.80032e-08	1.34683e-05	9.77413	FKBP3	2287
203821_at	2.93566	1.11261	10.1362	1.81859e-08	1.3516e-05	9.76395	HBEGF	1839
225623_at	-1.54729	-0.286825	-10.1358	1.81963e-08	1.3516e-05	9.76337	CIPC	85457
244379_at	-0.925687	-0.142506	-10.1355	1.82024e-08	1.3516e-05	9.76303	ANO7P1
242389_at	1.52591	0.347988	10.1351	1.82133e-08	1.3516e-05	9.76243	LUC7L3	51747
228617_at	-2.29116	-1.24754	-10.135	1.82156e-08	1.3516e-05	9.7623	XAF1	54739
1558801_at	1.32906	0.202885	10.1294	1.83605e-08	1.36014e-05	9.75431	NNT-AS1
219785_s_at	1.74071	0.129754	10.1278	1.84023e-08	1.36101e-05	9.75202	, C16orf95	100506581
227991_x_at	1.23354	0.39491	10.1172	1.8678e-08	1.37916e-05	9.73702	ZBTB43	23099
244261_at	1.78583	0.458989	10.1147	1.87427e-08	1.3817e-05	9.73353	IFNLR1	163702
212922_s_at	-1.02908	-0.324602	-10.1123	1.88079e-08	1.38338e-05	9.73003	SMYD2	56950
218586_at	1.07265	0.25092	10.1116	1.88263e-08	1.38338e-05	9.72904	MRGBP	55257
227935_s_at	-1.12658	-0.290123	-10.1084	1.89096e-08	1.38726e-05	9.72459	PCGF5	84333
217826_s_at	-1.05531	-0.125963	-10.1063	1.89654e-08	1.38911e-05	9.72162	UBE2J1	51465
213182_x_at	2.26286	0.404122	10.0971	1.92153e-08	1.40516e-05	9.70841	CDKN1C	1028
204608_at	-1.91671	-0.358091	-10.0947	1.92805e-08	1.40698e-05	9.705	, ASL	435
211759_x_at	-0.833608	-0.201754	-10.0939	1.93022e-08	1.40698e-05	9.70387	TBCB	1155
205171_at	1.57474	0.257716	10.0883	1.94539e-08	1.41577e-05	9.69596	PTPN4	5775
1555733_s_at	-1.24145	-0.442527	-10.0838	1.95793e-08	1.42262e-05	9.68948	AP1S3	130340
202573_at	1.07078	0.180037	10.0775	1.97532e-08	1.43297e-05	9.68057	CSNK1G2	1455
205172_x_at	-0.992751	-0.274485	-10.0715	1.99197e-08	1.44191e-05	9.67209	CLTB	1212
202172_at	1.27774	0.181887	10.0708	1.99399e-08	1.44191e-05	9.67107	VEZF1	7716
202066_at	0.97003	0.202361	10.0634	2.015e-08	1.4548e-05	9.6605	PPFIA1	8500
219727_at	1.35972	0.27112	10.0583	2.02951e-08	1.46011e-05	9.65326	DUOX2	50506
226271_at	-1.88045	-0.509598	-10.058	2.03036e-08	1.46011e-05	9.65284	GDAP1	54332
219880_at	1.20958	0.31911	10.0575	2.03199e-08	1.46011e-05	9.65203
222436_s_at	-1.35259	-0.284138	-10.0543	2.04108e-08	1.46432e-05	9.64753	CHMP3, RNF103-CHMP3	51652, 100526767
213011_s_at	-0.929731	-0.199562	-10.0519	2.04817e-08	1.4671e-05	9.64403	TPI1	7167
222429_at	-1.36813	-0.292893	-10.05	2.05342e-08	1.46828e-05	9.64144	DBNL	28988, 102466985
218740_s_at	-0.960235	-0.121909	-10.0491	2.05627e-08	1.46828e-05	9.64004	CDK5RAP3	80279
219378_at	1.62645	0.394707	10.0441	2.07087e-08	1.47638e-05	9.6329	NAA16	79612
244389_at	1.78996	0.404686	10.0361	2.09425e-08	1.48873e-05	9.62158	TLK1	9874
236769_at	1.43129	0.681149	10.036	2.09474e-08	1.48873e-05	9.62134
228988_at	1.90814	0.266519	10.0339	2.10094e-08	1.49081e-05	9.61836	ZNF711	7552
242073_at	-1.24423	-0.269922	-10.0317	2.10739e-08	1.49306e-05	9.61527
224574_at	-1.55649	-0.37097	-10.0215	2.1381e-08	1.51246e-05	9.60067	C17orf49, RNASEK-C17orf49	124944
205980_s_at	1.27143	0.0630625	10.0203	2.14169e-08	1.51265e-05	9.59897	ARHGAP8, PRR5-ARHGAP8	23779, 553158
210871_x_at	1.29108	0.13698	10.0183	2.1478e-08	1.51461e-05	9.5961	SSX2IP	117178
38892_at	1.00074	0.245633	10.0061	2.18528e-08	1.53866e-05	9.57864	GLTSCR1L	23506
224298_s_at	0.796443	0.120641	9.99662	2.21493e-08	1.55712e-05	9.56504	UBAC2	337867
212901_s_at	-1.52863	-0.386068	-9.99448	2.22168e-08	1.55946e-05	9.56197	CSTF2T	23283
208753_s_at	1.10849	0.0306685	9.98993	2.23608e-08	1.56715e-05	9.55545	, NAP1L1	4673
1569453_a_at	0.819086	0.146237	9.9859	2.24892e-08	1.57372e-05	9.54967
230056_at	1.08398	0.238479	9.98253	2.25975e-08	1.57887e-05	9.54482	BPTF	2186
210320_s_at	-1.02573	-0.210563	-9.97999	2.26789e-08	1.58141e-05	9.54119	DDX52	11056
224565_at	-1.64286	-0.208437	-9.97923	2.27035e-08	1.58141e-05	9.5401	NEAT1	283131, 693197
218394_at	-1.05318	-0.236404	-9.97649	2.27923e-08	1.58517e-05	9.53616	ROGDI	79641
202906_s_at	-0.957353	-0.285345	-9.97072	2.29801e-08	1.59579e-05	9.52788	NBN	4683
217755_at	-1.53375	-0.49249	-9.96537	2.31558e-08	1.60554e-05	9.52019	HN1	51155
212060_at	-0.956605	-0.255425	-9.95897	2.33677e-08	1.61777e-05	9.51099	U2SURP	23350
212266_s_at	-0.943985	-0.171361	-9.95718	2.34274e-08	1.61944e-05	9.50842	SRSF5	6430
235864_at	-1.15945	-0.195726	-9.95559	2.34803e-08	1.62063e-05	9.50614	ATP6V1D	51382
228914_at	1.57351	0.61058	9.95105	2.36328e-08	1.62869e-05	9.4996
239147_at	1.50312	0.204684	9.94403	2.38703e-08	1.64256e-05	9.48951	ARSK	153642
233982_x_at	-1.14335	-0.295677	-9.93111	2.43144e-08	1.6706e-05	9.4709	STYXL1	51657
205447_s_at	1.0222	0.207722	9.92133	2.46561e-08	1.69152e-05	9.45681	MAP3K12	7786
211122_s_at	-3.22973	-1.62402	-9.91157	2.50023e-08	1.71269e-05	9.44273	CXCL11	6373
203355_s_at	1.59392	0.0503602	9.89587	2.557e-08	1.74895e-05	9.42006	PSD3	23362
228141_at	2.22089	0.303098	9.88384	2.6014e-08	1.77664e-05	9.40268	GPX8	493869
239406_at	-1.31965	-0.18622	-9.87913	2.61902e-08	1.786e-05	9.39586	ZSCAN9	7746
224436_s_at	-2.01604	-0.406438	-9.8773	2.62588e-08	1.78799e-05	9.39322	NIPSNAP3A	25934
210683_at	1.21709	0.209121	9.87438	2.63688e-08	1.7928e-05	9.389	NRTN	4902
229656_s_at	1.58942	0.22143	9.86702	2.66487e-08	1.80912e-05	9.37833	EML6	400954
223409_at	1.24667	0.241013	9.86111	2.68755e-08	1.8218e-05	9.36977
227614_at	3.07314	1.01218	9.85978	2.69266e-08	1.82255e-05	9.36786	HKDC1	80201
216052_x_at	1.02483	0.34004	9.85233	2.72162e-08	1.83775e-05	9.35705	ARTN	9048
221675_s_at	1.43432	0.150167	9.85192	2.72321e-08	1.83775e-05	9.35646	CHPT1	56994
213489_at	-1.00548	-0.32551	-9.84915	2.73407e-08	1.84235e-05	9.35244	MAPRE2	10982
213096_at	1.19724	0.0688073	9.84054	2.76807e-08	1.86039e-05	9.33996	TMCC2	9911
227437_at	-1.48526	-0.327694	-9.8403	2.76902e-08	1.86039e-05	9.33961	NRAV	100506668
240172_at	1.53482	0.234967	9.83872	2.77531e-08	1.86187e-05	9.33732	ERGIC2	51290
236364_at	1.31381	0.231987	9.83508	2.78988e-08	1.86889e-05	9.33203
235924_at	-1.43154	-0.342221	-9.83329	2.79707e-08	1.87094e-05	9.32943	FRK	2444
213571_s_at	-1.25128	-0.275935	-9.82694	2.82273e-08	1.88534e-05	9.32021	EIF4E2	9470
226324_s_at	-1.26302	-0.26829	-9.82583	2.82723e-08	1.88558e-05	9.3186	IFT172	26160
209197_at	1.32135	0.356537	9.82252	2.84073e-08	1.8918e-05	9.31379	SYT11	23208
216056_at	1.88641	0.332912	9.8153	2.8704e-08	1.90877e-05	9.30329	CD44	960
212216_at	-1.41893	-0.246749	-9.81357	2.87754e-08	1.91069e-05	9.30078	PREPL	9581
209607_x_at	1.00626	0.342181	9.81257	2.88169e-08	1.91069e-05	9.29932	SULT1A4, SULT1A1, SLX1B-SULT1A4, SLX1A-SULT1A3, SULT1A3	445329, 105369243, 6817, 100526830, 100526831, 6818
230112_at	-1.3951	-0.280248	-9.80569	2.91038e-08	1.9269e-05	9.28932	MARCH4	57574
228452_at	1.36908	0.256212	9.80258	2.92346e-08	1.93199e-05	9.28479	GID4	79018
224394_at	1.02884	0.180727	9.80184	2.92656e-08	1.93199e-05	9.28372	RNF7	9616
203389_at	1.11967	0.212347	9.79519	2.95473e-08	1.94776e-05	9.27404	KIF3C	3797
224987_at	-0.899361	-0.0979987	-9.79301	2.96404e-08	1.95107e-05	9.27086	C6orf89	221477
205164_at	-0.982223	-0.336521	-9.78815	2.9849e-08	1.9611e-05	9.26378	GCAT	23464
219295_s_at	1.66154	0.526965	9.78636	2.9926e-08	1.9611e-05	9.26117	PCOLCE2	26577
226842_at	0.895101	0.248005	9.78621	2.99326e-08	1.9611e-05	9.26095	FBXL20	84961
225137_at	1.42723	0.171755	9.78545	2.99653e-08	1.9611e-05	9.25985	, NFATC3	4775
219861_at	-1.0248	-0.214391	-9.78318	3.00634e-08	1.96469e-05	9.25655	DNAJC17	55192
201301_s_at	-1.14197	-0.368044	-9.78149	3.01367e-08	1.96606e-05	9.25408	ANXA4	307
239084_at	1.09545	0.155136	9.78072	3.01706e-08	1.96606e-05	9.25295	SNAP29	9342
234998_at	-2.13362	-0.502251	-9.77321	3.04993e-08	1.98463e-05	9.242	RAB11A	8766
225616_at	-1.11318	-0.0416074	-9.76797	3.07309e-08	1.99684e-05	9.23436	SPRYD4	283377
1557119_a_at	-1.53361	-0.187081	-9.76539	3.08458e-08	2.00145e-05	9.23059	ZNF575	284346
243880_at	1.50421	0.287114	9.75877	3.1142e-08	2.01663e-05	9.22093	GOSR2	9570
35148_at	1.15465	0.308333	9.75819	3.11684e-08	2.01663e-05	9.22007
243953_at	1.43328	0.266016	9.75471	3.13256e-08	2.02392e-05	9.21499	FADS2	9415
204059_s_at	0.867992	0.460561	9.75296	3.14045e-08	2.02614e-05	9.21245	ME1	4199
222807_at	0.935297	0.147893	9.73897	3.2047e-08	2.06467e-05	9.19198	EMSY	56946
208832_at	-1.13143	-0.397976	-9.73774	3.2104e-08	2.06541e-05	9.19018	ATXN10	25814
239859_x_at	-1.41538	-0.224434	-9.73497	3.22331e-08	2.07078e-05	9.18613	ATP5S	27109
202319_at	1.09024	0.197844	9.72697	3.26084e-08	2.09194e-05	9.17443	SENP6	26054
231035_s_at	1.68981	0.211807	9.71562	3.31494e-08	2.12366e-05	9.1578
214220_s_at	-1.21413	-0.257455	-9.71173	3.33368e-08	2.13266e-05	9.1521	ALMS1	7840
202922_at	1.32894	0.507205	9.7049	3.36688e-08	2.15087e-05	9.14209	GCLC	2729
226701_at	-3.28629	-1.43379	-9.70387	3.37192e-08	2.15107e-05	9.14058	GJA5	2702
204871_at	-1.56767	-0.377625	-9.69841	3.39873e-08	2.16263e-05	9.13257
206376_at	1.14862	0.212194	9.69825	3.39955e-08	2.16263e-05	9.13233	SLC6A15	55117
218633_x_at	1.47749	0.169004	9.69489	3.41615e-08	2.16771e-05	9.1274	ABHD10	55347
221942_s_at	-2.07764	-0.684509	-9.69471	3.41706e-08	2.16771e-05	9.12713	GUCY1A3	2982
218628_at	-1.53576	-0.298893	-9.69154	3.43282e-08	2.17467e-05	9.12248	CCDC53	51019
200631_s_at	-0.834402	-0.0922595	-9.67594	3.51153e-08	2.22144e-05	9.09957	SET	6418
220140_s_at	-0.98496	-0.112716	-9.66848	3.54988e-08	2.24136e-05	9.08859	SNX11	29916
210544_s_at	1.65825	0.372861	9.6679	3.55287e-08	2.24136e-05	9.08774	ALDH3A2	224
202050_s_at	-0.820678	-0.210681	-9.66605	3.56245e-08	2.24429e-05	9.08501	ZMYM4	9202
217150_s_at	-1.76367	-0.530038	-9.66461	3.56992e-08	2.24588e-05	9.0829
1557064_s_at	-1.49511	-0.220653	-9.6598	3.59498e-08	2.25852e-05	9.07582	HGSNAT	138050
218284_at	2.33328	0.424355	9.65806	3.60413e-08	2.26115e-05	9.07326	SMAD3	4088
219828_at	1.70407	0.260394	9.65183	3.63697e-08	2.27861e-05	9.06408	RABL6	55684
236451_at	-1.60748	-0.348852	-9.6461	3.66748e-08	2.29456e-05	9.05564		100996579
222897_s_at	1.49004	0.239935	9.64504	3.67312e-08	2.29493e-05	9.05409	ZFP64	55734
227981_at	-1.08063	-0.104711	-9.6411	3.69429e-08	2.30014e-05	9.04828	CYB561D1	284613
232217_at	-2.58173	-0.731259	-9.64032	3.69848e-08	2.30014e-05	9.04713	FAM26E	254228
218773_s_at	-1.24166	-0.283269	-9.64001	3.70016e-08	2.30014e-05	9.04667	MSRB2	22921
235117_at	-1.70323	-0.442974	-9.6391	3.70508e-08	2.30014e-05	9.04533	CHAC2	494143
225131_at	1.03229	0.249614	9.63879	3.70673e-08	2.30014e-05	9.04488	ZRANB1	54764
222853_at	-1.53547	-0.31002	-9.63423	3.73147e-08	2.31233e-05	9.03815	FLRT3	23767
239292_at	1.36137	0.469724	9.6324	3.74146e-08	2.31537e-05	9.03545
216194_s_at	-0.823806	-0.182876	-9.62828	3.76404e-08	2.32618e-05	9.02936	TBCB	1155
210542_s_at	1.86181	0.265825	9.60891	3.87204e-08	2.38842e-05	9.00076	SLCO3A1	28232
232350_x_at	1.12226	0.160265	9.60834	3.87525e-08	2.38842e-05	8.99992	GPR161	23432
201696_at	1.13284	0.196925	9.59938	3.92632e-08	2.41662e-05	8.98668	SRSF4	6429
242363_at	-1.54343	-0.424142	-9.59631	3.94401e-08	2.42423e-05	8.98214
45714_at	1.46449	0.149329	9.59133	3.97282e-08	2.43864e-05	8.97477	HCFC1R1	54985
209501_at	1.35189	0.196579	9.59014	3.97976e-08	2.43937e-05	8.97301	CDR2	1039, 101060399
212681_at	-2.36182	-0.56884	-9.58901	3.98636e-08	2.43937e-05	8.97134	EPB41L3	23136
223773_s_at	2.094	0.42187	9.58837	3.99011e-08	2.43937e-05	8.97038	SNHG12	85028
201267_s_at	-0.927209	-0.181101	-9.5836	4.01807e-08	2.45317e-05	8.96332	PSMC3	5702
239609_s_at	1.8244	0.405921	9.57659	4.0595e-08	2.47515e-05	8.95295	LPCAT4	254531
203217_s_at	1.47157	0.30306	9.57445	4.07229e-08	2.47962e-05	8.94976	ST3GAL5	8869
227940_at	-2.01337	-0.466525	-9.57178	4.08823e-08	2.486e-05	8.94581		339803
223141_at	0.967305	0.180265	9.57043	4.09631e-08	2.48758e-05	8.94382	UCK1	83549
202257_s_at	-0.850538	-0.0656905	-9.56197	4.14746e-08	2.51529e-05	8.93127	CD2BP2	10421
230948_at	1.04944	0.311063	9.55607	4.18355e-08	2.53213e-05	8.9225
205052_at	1.05081	0.157675	9.55561	4.18637e-08	2.53213e-05	8.92182	AUH	549
203662_s_at	1.35262	0.389405	9.55423	4.1948e-08	2.53386e-05	8.91979	TMOD1	7111
48031_r_at	-1.17248	-0.288403	-9.54919	4.22595e-08	2.54929e-05	8.9123	FAXDC2	10826
205749_at	4.245	2.62489	9.54732	4.23761e-08	2.55294e-05	8.90952	CYP1A1	1543
218537_at	1.13186	0.146173	9.54356	4.26103e-08	2.56366e-05	8.90394	HCFC1R1	54985
232422_at	-1.42835	-0.353997	-9.53482	4.31611e-08	2.59336e-05	8.89095	GGACT	87769
204759_at	1.96109	0.439244	9.5332	4.32642e-08	2.59613e-05	8.88854	RCBTB2	1102
221641_s_at	-0.902023	-0.193356	-9.53096	4.34068e-08	2.60016e-05	8.88521	ACOT9	23597
1569030_s_at	-0.784649	-0.244836	-9.53021	4.34545e-08	2.60016e-05	8.8841	NUB1	51667
208216_at	1.35807	0.138234	9.52945	4.35029e-08	2.60016e-05	8.88297	DLX4	1748
227312_at	1.22685	0.158926	9.51819	4.42297e-08	2.64013e-05	8.86621	SNTB2	6645
244177_at	1.23242	0.134475	9.5126	4.45953e-08	2.65847e-05	8.85788	ING1	3621
218102_at	-1.48726	-0.347726	-9.50808	4.48926e-08	2.67269e-05	8.85116	DERA	51071
202270_at	-2.98015	-1.4977	-9.49925	4.54803e-08	2.70414e-05	8.838	GBP1	2633
210927_x_at	0.847157	0.159076	9.49442	4.58053e-08	2.71852e-05	8.8308	JTB	10899
201624_at	-1.325	-0.301768	-9.49248	4.59365e-08	2.71852e-05	8.8279	DARS	1615
203420_at	0.840529	0.132973	9.49218	4.59573e-08	2.71852e-05	8.82745	FAM8A1	51439
210039_s_at	-0.961805	-0.284886	-9.49212	4.59613e-08	2.71852e-05	8.82736	PRKCQ	5588
207490_at	-0.971231	-0.168815	-9.48604	4.6375e-08	2.7386e-05	8.81829	TUBA4B
234991_at	1.37589	0.313197	9.48536	4.64213e-08	2.7386e-05	8.81728
228031_at	-1.15364	-0.179973	-9.48057	4.67505e-08	2.75445e-05	8.81013	TTPAL	79183
201962_s_at	1.12489	0.149002	9.4748	4.71508e-08	2.77444e-05	8.80151	RNF41	10193
202447_at	-1.38902	-0.399409	-9.47077	4.74321e-08	2.78739e-05	8.79549	DECR1	1666
241482_at	1.35634	0.360399	9.46207	4.80457e-08	2.81678e-05	8.78248	EPHA1	2041
219250_s_at	-1.88902	-0.407526	-9.46192	4.8056e-08	2.81678e-05	8.78226	FLRT3	23767
219825_at	3.17754	0.508217	9.45747	4.83731e-08	2.83171e-05	8.77561	CYP26B1	56603
1558445_at	1.38015	0.230143	9.45563	4.85047e-08	2.83431e-05	8.77286
244417_at	-0.79424	-0.0539613	-9.45434	4.85974e-08	2.83431e-05	8.77093
214252_s_at	-0.975596	-0.248853	-9.45424	4.86044e-08	2.83431e-05	8.77078	CLN5,	1203
238430_x_at	-1.12647	-0.208026	-9.44954	4.89439e-08	2.85046e-05	8.76374	SLFN5	162394
204222_s_at	-2.12468	-0.798312	-9.44537	4.92466e-08	2.86094e-05	8.7575	GLIPR1	11010
242775_at	2.89984	1.19238	9.44533	4.92497e-08	2.86094e-05	8.75743
1564637_a_at	-1.42912	-0.377523	-9.44315	4.94086e-08	2.86651e-05	8.75417	FAM98B	283742
229090_at	-1.19114	-0.188356	-9.44114	4.95556e-08	2.8681e-05	8.75117	ZEB1-AS1
223345_at	1.27811	0.0650964	9.44105	4.95621e-08	2.8681e-05	8.75103	HDAC8	55869
225534_at	-1.53296	-0.285574	-9.43924	4.96949e-08	2.87213e-05	8.74833	SMIM19	114926
221912_s_at	1.64905	0.0683	9.43671	4.9882e-08	2.87928e-05	8.74452	CCDC28B	79140
201302_at	-1.41178	-0.427321	-9.43579	4.995e-08	2.87955e-05	8.74315	ANXA4	307
224367_at	1.83842	0.62891	9.43195	5.02345e-08	2.89229e-05	8.7374	BEX2	84707
239431_at	1.1131	0.245265	9.4278	5.0544e-08	2.90643e-05	8.73118	TMED7-TICAM2, TICAM2	100302736, 353376
202449_s_at	1.73308	0.256138	9.42201	5.09795e-08	2.92777e-05	8.7225	RXRA	6256
207304_at	1.21251	0.321877	9.41985	5.1143e-08	2.93346e-05	8.71926	ZNF45	7596
217785_s_at	-1.05416	-0.151764	-9.41864	5.1235e-08	2.93503e-05	8.71744	YKT6	10652
224232_s_at	-0.965543	-0.170463	-9.41767	5.13087e-08	2.93556e-05	8.71598	PRELID1	27166
222808_at	-0.947726	-0.0732847	-9.41668	5.13843e-08	2.93619e-05	8.71449	ALG13	79868
224935_at	-0.790007	-0.197968	-9.40324	5.24189e-08	2.98858e-05	8.69432	EIF2S3	1968
205401_at	-0.87791	-0.29084	-9.40306	5.24326e-08	2.98858e-05	8.69405	AGPS	8540
212530_at	-1.09691	-0.165345	-9.39885	5.27613e-08	2.99983e-05	8.68773	NEK7	140609
202887_s_at	1.68736	0.279242	9.39885	5.27619e-08	2.99983e-05	8.68772	DDIT4	54541
230036_at	-2.54562	-0.908295	-9.3972	5.2891e-08	3.00342e-05	8.68524	SAMD9L	219285
206117_at	-1.51147	-0.463578	-9.39576	5.30046e-08	3.00611e-05	8.68307	TPM1	7168
203380_x_at	-0.958305	-0.177434	-9.39481	5.30792e-08	3.0066e-05	8.68165	SRSF5	6430
217998_at	1.83542	0.687342	9.38505	5.38546e-08	3.04673e-05	8.66697	PHLDA1, NAP1L1	22822, 4673
204125_at	-1.03176	-0.173314	-9.38059	5.42123e-08	3.06315e-05	8.66027	NDUFAF1	51103
227970_at	1.12061	0.35085	9.37385	5.47583e-08	3.09017e-05	8.65012	GPR157	80045
203320_at	2.43283	0.492915	9.37067	5.50182e-08	3.10099e-05	8.64533	SH2B3	10019
209674_at	-1.6626	-0.310046	-9.36907	5.51497e-08	3.10187e-05	8.64291	CRY1	1407
203282_at	-1.51467	-0.297945	-9.36882	5.51703e-08	3.10187e-05	8.64253	GBE1	2632
227937_at	1.41478	0.370579	9.36695	5.53236e-08	3.10665e-05	8.63972	MYPOP	339344
242726_at	1.17575	0.238734	9.36416	5.5554e-08	3.11266e-05	8.63552	ACSL3	2181
209418_s_at	0.746455	0.0711453	9.36399	5.55676e-08	3.11266e-05	8.63527	THOC5	8563
235299_at	1.58749	0.417205	9.36294	5.56553e-08	3.11374e-05	8.63367	SLC41A2	84102
218237_s_at	0.965296	0.328973	9.35819	5.60497e-08	3.13196e-05	8.62652	SLC38A1	81539
205427_at	1.2604	0.283013	9.35715	5.61372e-08	3.13299e-05	8.62494	ZNF354A	6940
225139_at	1.43749	0.163665	9.35621	5.62157e-08	3.13353e-05	8.62353	NFATC3	4775
218927_s_at	1.42059	0.153977	9.34627	5.70541e-08	3.17637e-05	8.60854	CHST12	55501, 101927181
219479_at	1.40501	0.116003	9.34261	5.73668e-08	3.18574e-05	8.60301	KDELC1	79070
212026_s_at	-1.87164	-0.36246	-9.34219	5.74019e-08	3.18574e-05	8.60239	EXOC7	23265
235096_at	0.9808	0.170203	9.34184	5.74325e-08	3.18574e-05	8.60185	LEO1	123169
212800_at	1.14613	0.146795	9.34069	5.75308e-08	3.18731e-05	8.60012	STX6	10228
211776_s_at	-1.90737	-0.526749	-9.3375	5.78055e-08	3.19376e-05	8.59529	EPB41L3	23136
218027_at	-1.07362	-0.216279	-9.33701	5.78471e-08	3.19376e-05	8.59457	MRPL15	29088
226024_at	-1.19669	-0.344363	-9.33689	5.7858e-08	3.19376e-05	8.59438	COMMD1	150684
212339_at	1.50886	0.220856	9.33538	5.79884e-08	3.19708e-05	8.5921	EPB41L1	2036
228764_s_at	-1.84176	-0.399963	-9.33172	5.83058e-08	3.21069e-05	8.58657	NEDD8-MDP1, , MDP1	145553
227770_at	0.956911	0.108172	9.33063	5.84005e-08	3.21202e-05	8.58493	COG8
201744_s_at	-1.66483	-0.313062	-9.32686	5.87298e-08	3.22495e-05	8.57923	LUM	4060
200822_x_at	-0.903653	-0.211629	-9.32632	5.87774e-08	3.22495e-05	8.57841	TPI1, TPI1P1	7167
1555390_at	-1.14119	-0.334218	-9.32366	5.90113e-08	3.23388e-05	8.57439	NOP9	161424
202446_s_at	-1.11872	-0.60103	-9.32225	5.9136e-08	3.23681e-05	8.57225	PLSCR1	5359
202079_s_at	1.34351	0.198371	9.31655	5.96418e-08	3.26057e-05	8.56363	TRAK1	22906
228121_at	-3.01076	-0.77413	-9.31488	5.97901e-08	3.26476e-05	8.56112	TGFB2, TGFB2-OT1	7042, 103611157
226431_at	1.5433	0.06574	9.31333	5.99292e-08	3.26843e-05	8.55876	FAM117B	150864
224444_s_at	-2.34289	-0.450791	-9.31235	6.00173e-08	3.26856e-05	8.55728	LINC00467
205251_at	-1.90441	-0.570922	-9.3117	6.00753e-08	3.26856e-05	8.5563	PER2	8864
205425_at	1.81075	0.206539	9.30792	6.04152e-08	3.28312e-05	8.55058	HIP1	3092
205625_s_at	-2.25287	-0.335469	-9.3048	6.06984e-08	3.29458e-05	8.54585	CALB1	793
204512_at	1.50078	0.355671	9.29748	6.13661e-08	3.32685e-05	8.53477	HIVEP1	3096
218196_at	1.01679	0.321102	9.29604	6.14981e-08	3.33004e-05	8.53259	OSTM1	28962
37117_at	1.02092	0.0403401	9.29314	6.17661e-08	3.34057e-05	8.52819	ARHGAP8, PRR5-ARHGAP8	23779, 553158
204484_at	1.10809	0.138711	9.2857	6.24581e-08	3.36588e-05	8.51691	PIK3C2B	5287
208502_s_at	1.8674	0.322678	9.28568	6.24598e-08	3.36588e-05	8.51688	PITX1	5307
237262_at	1.15477	0.278527	9.28538	6.24873e-08	3.36588e-05	8.51644	GAREM1	64762
216988_s_at	0.891742	0.21008	9.28442	6.25774e-08	3.36588e-05	8.51498	PTP4A2	8073
213922_at	1.30468	0.301015	9.28414	6.2604e-08	3.36588e-05	8.51455	TTBK2	146057
221753_at	1.65102	0.35879	9.27827	6.31564e-08	3.39157e-05	8.50565	SSH1	54434
229742_at	1.5209	0.197555	9.26834	6.41041e-08	3.4384e-05	8.49056	C15orf61	145853
221004_s_at	0.957853	0.124809	9.2666	6.42713e-08	3.44331e-05	8.48793	ITM2C	81618
212646_at	-0.943351	-0.236934	-9.25825	6.50808e-08	3.48258e-05	8.47525	RFTN1	23180
226480_at	1.20678	0.199098	9.25641	6.52614e-08	3.48814e-05	8.47244
219036_at	1.74173	0.152522	9.25438	6.54606e-08	3.49117e-05	8.46936	CEP70	80321
202732_at	0.913744	0.180936	9.25427	6.54716e-08	3.49117e-05	8.46919	PKIG	11142
228198_s_at	-1.58938	-0.293326	-9.25267	6.56288e-08	3.49357e-05	8.46676	FAHD2CP
235124_at	-1.42518	-0.20407	-9.25225	6.56703e-08	3.49357e-05	8.46612	EIF3J-AS1
217967_s_at	1.87122	0.58042	9.25069	6.58238e-08	3.49764e-05	8.46375	FAM129A	116496
232095_at	1.20138	0.0756781	9.2492	6.59712e-08	3.50128e-05	8.46149	SRGAP2C, SRGAP2B	653464, 647135
203329_at	1.06366	0.1409	9.24844	6.60462e-08	3.50128e-05	8.46034	PTPRM	5797
207713_s_at	1.43078	0.392674	9.24662	6.62276e-08	3.50681e-05	8.45756	RBCK1	10616
209890_at	1.12035	0.20949	9.2452	6.63689e-08	3.51016e-05	8.4554	TSPAN5	10098
224684_at	-0.727448	-0.175916	-9.24443	6.64451e-08	3.51016e-05	8.45424	SNX12	29934
213578_at	1.03677	0.155087	9.24214	6.66746e-08	3.51635e-05	8.45074	BMPR1A	657
208732_at	-1.27982	-0.248154	-9.24172	6.6717e-08	3.51635e-05	8.4501	RAB2A	5862
221527_s_at	1.34192	0.248698	9.23295	6.76021e-08	3.55888e-05	8.43675	PARD3	56288
209143_s_at	1.02036	0.0529977	9.23132	6.77681e-08	3.56349e-05	8.43427	CLNS1A	1207
215108_x_at	3.27258	0.444458	9.22895	6.80098e-08	3.57207e-05	8.43066	TOX3	27324
210038_at	-1.16243	-0.313603	-9.22781	6.81263e-08	3.57407e-05	8.42893	PRKCQ	5588
225861_at	1.52293	0.202258	9.22677	6.82326e-08	3.57552e-05	8.42735	MCRIP2	84331, 100287175
236551_at	-1.9274	-0.4608	-9.22482	6.84334e-08	3.57634e-05	8.42437	ZNF311	282890
218838_s_at	-1.34469	-0.224347	-9.22473	6.8443e-08	3.57634e-05	8.42423	TTC31	64427
213911_s_at	1.05377	-0.00356291	9.22433	6.84841e-08	3.57634e-05	8.42362	H2AFZ	3015
211685_s_at	-2.47623	-0.262604	-9.21673	6.9272e-08	3.61333e-05	8.41203	NCALD	83988
213186_at	-1.5544	-0.668609	-9.20803	7.01845e-08	3.65674e-05	8.39878	DZIP3	9666
209016_s_at	-1.86187	-0.450401	-9.20437	7.05732e-08	3.67278e-05	8.39318	KRT7	3855
230209_at	1.13135	0.167654	9.2	7.10392e-08	3.69281e-05	8.38651
233350_s_at	0.975028	0.219952	9.19699	7.13625e-08	3.70538e-05	8.38191	TEX264	51368
238804_at	2.14785	0.36051	9.19496	7.15809e-08	3.71248e-05	8.37882
211113_s_at	1.81595	0.992553	9.19268	7.18275e-08	3.71838e-05	8.37533	ABCG1	9619
1552370_at	-1.64866	-0.654325	-9.1924	7.18581e-08	3.71838e-05	8.3749	C4orf33	132321
235311_at	1.22968	0.0913594	9.19042	7.20722e-08	3.72522e-05	8.37189	FKBP14	55033
218634_at	1.13738	0.273755	9.18657	7.24925e-08	3.74269e-05	8.366	PHLDA3	23612
233496_s_at	-1.21207	-0.282532	-9.18481	7.26851e-08	3.74838e-05	8.36331	CFL2	1073
225374_at	-0.914218	-0.104806	-9.18223	7.29682e-08	3.75872e-05	8.35937	TMEM199	147007, 100616388
222825_at	-1.66907	-0.401903	-9.1762	7.36354e-08	3.7888e-05	8.35015	OTUD6B	51633
200055_at	-0.881926	-0.195293	-9.17381	7.39022e-08	3.79822e-05	8.34648	TAF10	6881
215417_at	-0.852826	-0.0914536	-9.17276	7.40197e-08	3.79997e-05	8.34487	EXOC6B	23233
229776_at	1.624	0.236256	9.15925	7.55456e-08	3.87337e-05	8.3242	SLCO3A1	28232
226352_at	1.4975	0.429906	9.1586	7.56197e-08	3.87337e-05	8.32321	JMY	133746
238135_at	2.01024	0.462548	9.15582	7.59382e-08	3.88531e-05	8.31895	AGTRAP	57085
206284_x_at	-0.946931	-0.263835	-9.15344	7.62125e-08	3.89496e-05	8.31529	CLTB	1212
202455_at	1.52904	0.396269	9.15111	7.64819e-08	3.90434e-05	8.31172	HDAC5	10014
201804_x_at	-0.806075	-0.180403	-9.14944	7.66755e-08	3.90983e-05	8.30916	TBCB	1155
219390_at	0.833363	0.100619	9.13702	7.81295e-08	3.97952e-05	8.29012	FKBP14	55033
212287_at	0.909592	0.180712	9.13594	7.82573e-08	3.98157e-05	8.28846	SUZ12	23512
220979_s_at	-1.68439	-0.482197	-9.13381	7.85107e-08	3.98999e-05	8.28519	ST6GALNAC5	81849
219973_at	1.41784	0.266691	9.13161	7.87726e-08	3.99783e-05	8.28181	ARSJ	79642
202057_at	1.60753	0.379553	9.13104	7.88406e-08	3.99783e-05	8.28094	KPNA1	3836
213940_s_at	-0.816166	-0.080899	-9.12732	7.92868e-08	4.01598e-05	8.27522	FNBP1	23048
205459_s_at	0.735929	0.190159	9.12234	7.98871e-08	4.04188e-05	8.26758	NPAS2	4862
227415_at	0.822721	0.270391	9.12066	8.00904e-08	4.04767e-05	8.265	DGKH	160851
209059_s_at	-0.916456	-0.16639	-9.11513	8.07649e-08	4.07722e-05	8.2565	EDF1	8721
218231_at	-0.855543	-0.260433	-9.11198	8.11519e-08	4.08875e-05	8.25166	NAGK	55577
203952_at	-0.821298	-0.127428	-9.11181	8.11731e-08	4.08875e-05	8.25139	ATF6	22926
219587_at	-1.09303	-0.36151	-9.10939	8.14718e-08	4.09926e-05	8.24767	TTC12	54970
214475_x_at	-1.4596	-0.316447	-9.10704	8.17636e-08	4.1094e-05	8.24405	CAPN3,	825
217529_at	1.2487	0.368825	9.10432	8.21011e-08	4.12181e-05	8.23987	ORAI2	80228
202937_x_at	-1.50617	-0.409407	-9.09932	8.27272e-08	4.14866e-05	8.23217	RRP7A	27341
241817_at	1.20894	0.341667	9.09741	8.29673e-08	4.1515e-05	8.22924	C3orf62	375341
226706_at	-1.70707	-0.375982	-9.0969	8.30321e-08	4.1515e-05	8.22844	QSOX1	5768
1553989_a_at	-2.15766	-0.268541	-9.09669	8.30577e-08	4.1515e-05	8.22813	ATP6V1C2	245973
200676_s_at	1.53676	0.206162	9.09449	8.33359e-08	4.15699e-05	8.22474	UBE2L3	7332
243271_at	-1.59257	-0.512	-9.09438	8.33502e-08	4.15699e-05	8.22457
218549_s_at	-1.49947	-0.252991	-9.09247	8.35918e-08	4.16447e-05	8.22164	RMDN1	51115
224478_s_at	-1.23365	-0.370086	-9.08953	8.39659e-08	4.17853e-05	8.21711	C7orf50	84310
204858_s_at	-1.10494	-0.277479	-9.07849	8.53883e-08	4.24467e-05	8.20008	TYMP, SCO2	1890, 9997
223157_at	0.762624	0.105801	9.076	8.57115e-08	4.25609e-05	8.19625	NOA1	84273
212138_at	0.887076	0.207642	9.06504	8.7153e-08	4.32295e-05	8.17935	PDS5A	23244
238164_at	-1.75357	-0.415701	-9.06298	8.74272e-08	4.33182e-05	8.17617	USP6NL	9712
222173_s_at	1.08899	0.296409	9.05883	8.79813e-08	4.35453e-05	8.16976	TBC1D2	55357
218795_at	1.17726	0.276646	9.05752	8.81572e-08	4.35849e-05	8.16774	ACP6	51205
205279_s_at	1.85671	0.374335	9.05582	8.83855e-08	4.36504e-05	8.16511	GLRB	2743
223423_at	-2.04107	-0.511869	-9.04964	8.92222e-08	4.40158e-05	8.15556	GPR160	26996
217823_s_at	-1.08657	-0.0964295	-9.04827	8.94091e-08	4.40602e-05	8.15344	UBE2J1	51465
230570_at	-0.862637	-0.358193	-9.04527	8.98188e-08	4.42142e-05	8.14881	EIF3H	8667
222472_at	0.915013	0.241621	9.04333	9.00847e-08	4.42745e-05	8.14581	AFTPH	54812
211758_x_at	-1.12993	-0.1212	-9.04296	9.0136e-08	4.42745e-05	8.14523	TXNDC9	10190
211450_s_at	1.33851	-0.0211504	9.03265	9.15654e-08	4.49281e-05	8.12928	MSH6	2956
229371_at	1.12969	0.323845	9.03095	9.1803e-08	4.49553e-05	8.12666
212400_at	1.48179	0.46146	9.02949	9.20075e-08	4.49553e-05	8.1244	FAM102A	399665
209058_at	-0.848418	-0.16427	-9.02916	9.20547e-08	4.49553e-05	8.12388	EDF1	8721
211275_s_at	-1.47183	-0.337266	-9.02908	9.20646e-08	4.49553e-05	8.12377	GYG1	2992
213435_at	1.27918	0.319918	9.02873	9.21149e-08	4.49553e-05	8.12322	SATB2	23314
223479_s_at	-1.20023	-0.220894	-9.026	9.24996e-08	4.50946e-05	8.11899	CHCHD5	84269
227385_at	-1.36544	-0.132313	-9.02288	9.29405e-08	4.52611e-05	8.11417	PLPP6	403313
203778_at	1.00396	0.233935	9.02172	9.31062e-08	4.52635e-05	8.11237	MANBA	4126
237159_x_at	-1.33393	-0.451353	-9.02145	9.31445e-08	4.52635e-05	8.11195	AP1S3	130340
201952_at	0.922495	0.039008	9.01772	9.36767e-08	4.54735e-05	8.10617	ALCAM	214
235406_x_at	-1.10561	-0.204778	-9.00922	9.49014e-08	4.60189e-05	8.093	TMEM161B-AS1	100505894
212313_at	0.952736	0.169222	9.00791	9.50925e-08	4.60443e-05	8.09096	CHMP7	91782
205042_at	2.13231	0.47766	9.00747	9.51563e-08	4.60443e-05	8.09028	GNE	10020
202948_at	-0.895016	-0.248857	-9.00472	9.55577e-08	4.61895e-05	8.08602	IL1R1	3554
206441_s_at	-1.11273	-0.309425	-8.9965	9.67667e-08	4.66776e-05	8.07327	COMMD4	54939
209045_at	-0.710123	-0.158032	-8.99646	9.67729e-08	4.66776e-05	8.0732	XPNPEP1	7511
228852_at	1.50576	0.26281	8.98923	9.78495e-08	4.71469e-05	8.06199	ENSA	2029
239134_at	-1.43983	-0.192865	-8.98821	9.80032e-08	4.71659e-05	8.06039
221190_s_at	0.941743	0.250448	8.98759	9.80963e-08	4.71659e-05	8.05943	C18orf8	29919
220251_at	2.02246	0.312557	8.98215	9.89171e-08	4.75103e-05	8.05098	DIEXF	27042
202086_at	-1.95952	-1.15783	-8.97841	9.94858e-08	4.77331e-05	8.04517	MX1	4599
222316_at	-1.37548	-0.0673906	-8.97633	9.98032e-08	4.78222e-05	8.04194
221873_at	1.16662	0.384637	8.97581	9.98819e-08	4.78222e-05	8.04114	ZNF143	7702
228825_at	2.53426	1.15652	8.97364	1.00215e-07	4.79312e-05	8.03777	PTGR1	22949
221328_at	-1.67368	-0.276678	-8.96643	1.0133e-07	4.84135e-05	8.02655	CLDN17	26285
228189_at	1.00754	0.0914838	8.9655	1.01474e-07	4.84318e-05	8.0251	BAG4	9530
219307_at	0.939525	0.130085	8.96344	1.01795e-07	4.8534e-05	8.0219	PDSS2	57107
203019_x_at	1.12274	0.137682	8.9548	1.03154e-07	4.91302e-05	8.00846	SSX2IP	117178
226409_at	0.96034	0.239338	8.95369	1.0333e-07	4.91628e-05	8.00672	TBC1D20	128637
225721_at	-0.846418	-0.24521	-8.95251	1.03518e-07	4.9184e-05	8.00489	SYNPO2	171024
214774_x_at	3.56025	0.58199	8.95188	1.03618e-07	4.9184e-05	8.0039	TOX3	27324
222736_s_at	1.52612	0.229092	8.95137	1.03699e-07	4.9184e-05	8.00311	TMEM38B	55151
212130_x_at	1.0945	0.376286	8.94978	1.03953e-07	4.9253e-05	8.00063	EIF1	10209
207769_s_at	0.835464	0.0750463	8.9467	1.04446e-07	4.94352e-05	7.99583	PQBP1	10084
202140_s_at	1.03584	0.271807	8.94253	1.05117e-07	4.96597e-05	7.98934	CLK3	1198
227375_at	1.02248	0.348671	8.94239	1.05139e-07	4.96597e-05	7.98912	ANKRD13C	81573
200892_s_at	-1.48605	-0.320654	-8.94018	1.05497e-07	4.97772e-05	7.98568	TRA2B	6434
218788_s_at	1.01366	0.0458922	8.93547	1.06264e-07	5.0087e-05	7.97833	SMYD3	64754
1554274_a_at	1.51986	0.381098	8.93285	1.06693e-07	5.02371e-05	7.97425	SSH1	54434
238794_at	-1.58251	-0.224768	-8.92973	1.07206e-07	5.04266e-05	7.96938	SFR1	119392
229497_at	1.92241	0.391059	8.921	1.08656e-07	5.10558e-05	7.95575	ANKDD1A	348094
227921_at	-1.38386	-0.293104	-8.91369	1.09886e-07	5.15806e-05	7.94433
218746_at	-0.999042	-0.200213	-8.90836	1.10791e-07	5.19519e-05	7.93601	TAPBPL	55080
224767_at	1.42558	0.36958	8.90642	1.11124e-07	5.20543e-05	7.93297	RPL37	6167
1553288_a_at	1.5465	0.289367	8.90489	1.11386e-07	5.21232e-05	7.93059	NYAP1	222950
209048_s_at	1.69118	0.359019	8.89944	1.12327e-07	5.25093e-05	7.92206	ZMYND8	23613
225318_at	0.915076	0.0832261	8.89529	1.13046e-07	5.27422e-05	7.91558	WHSC1L1	54904
225764_at	1.39554	0.208125	8.89524	1.13057e-07	5.27422e-05	7.91549	ETV6	2120
201535_at	-0.942334	-0.0962497	-8.89398	1.13275e-07	5.27901e-05	7.91352	UBL3	5412
204209_at	-1.14177	-0.255346	-8.89219	1.1359e-07	5.28823e-05	7.91072	PCYT1A	5130
202037_s_at	2.3105	0.106305	8.88959	1.14045e-07	5.30401e-05	7.90666	SFRP1	6422
212994_at	0.884253	0.18925	8.8885	1.14237e-07	5.30751e-05	7.90495	THOC2	57187
224726_at	0.761096	0.190514	8.88751	1.14412e-07	5.31022e-05	7.9034	MIB1	57534
205788_s_at	0.753098	0.247669	8.88553	1.14762e-07	5.32061e-05	7.9003	ZC3H11B, ZC3H11A	441155, 9877
231978_at	1.45725	0.384345	8.88492	1.1487e-07	5.32061e-05	7.89935	TPCN2	219931
225372_at	2.04445	0.540305	8.87573	1.16512e-07	5.39119e-05	7.88495	C10orf54	64115
226679_at	1.44063	0.434798	8.87322	1.16966e-07	5.40474e-05	7.881	SLC26A11	284129
204044_at	2.0415	0.305172	8.87279	1.17043e-07	5.40474e-05	7.88034	QPRT	23475
209300_s_at	-0.957629	-0.131076	-8.86958	1.17624e-07	5.42225e-05	7.87531	NECAP1	25977
221041_s_at	0.95704	0.325464	8.86938	1.1766e-07	5.42225e-05	7.875	SLC17A5	26503
205222_at	-2.07006	-0.56838	-8.86789	1.17931e-07	5.42925e-05	7.87266	EHHADH	1962
235352_at	1.55386	0.266675	8.86689	1.18115e-07	5.43035e-05	7.87108	MR1	3140
220161_s_at	-1.11563	-0.303869	-8.86645	1.18194e-07	5.43035e-05	7.87041	EPB41L4B	54566
202021_x_at	1.10504	0.388103	8.86507	1.18448e-07	5.4365e-05	7.86823	EIF1	10209
221743_at	0.938299	0.199955	8.86025	1.19334e-07	5.47167e-05	7.86067	CELF1	10658
212227_x_at	1.10421	0.367211	8.85845	1.19666e-07	5.48136e-05	7.85785	EIF1	10209
215343_at	1.39786	0.140635	8.8499	1.2126e-07	5.54879e-05	7.84443	CCDC88C	440193
1555383_a_at	-1.80714	-0.620005	-8.84423	1.22329e-07	5.59207e-05	7.83552	POF1B	79983
243982_at	-1.83992	-0.1702	-8.84167	1.22815e-07	5.60244e-05	7.8315
223174_at	-0.905174	-0.138623	-8.84121	1.22902e-07	5.60244e-05	7.83079	BTBD10	84280
227295_at	1.13949	-0.126721	8.84109	1.22925e-07	5.60244e-05	7.83059	IKBIP	121457
230664_at	1.23158	-0.150514	8.83748	1.23615e-07	5.62823e-05	7.82492
204552_at	0.877407	0.0468413	8.83644	1.23815e-07	5.63168e-05	7.82328	INPP4A	3631
243154_at	2.01813	0.587028	8.83512	1.24066e-07	5.63751e-05	7.82122
213112_s_at	2.40798	0.988059	8.83136	1.24793e-07	5.66251e-05	7.81529	SQSTM1	8878
1564031_a_at	0.845683	0.259693	8.83098	1.24866e-07	5.66251e-05	7.8147	RELL2	285613
214585_s_at	-1.40317	-0.310556	-8.82916	1.25218e-07	5.67285e-05	7.81184	VPS52	6293
208700_s_at	1.74474	0.437355	8.82839	1.25369e-07	5.67401e-05	7.81062	TKT	7086
212242_at	-1.04606	-0.26789	-8.82151	1.26712e-07	5.72383e-05	7.79981	TUBA4A	7277
231002_s_at	1.09851	0.190813	8.82147	1.26721e-07	5.72383e-05	7.79974	RABEP1	9135
242228_at	-1.59838	-0.38558	-8.81906	1.27196e-07	5.73957e-05	7.79594
203732_at	-0.875892	-0.080799	-8.81724	1.27555e-07	5.75007e-05	7.79308	TRIP4	9325
227272_at	-1.10418	-0.0435177	-8.81484	1.2803e-07	5.76576e-05	7.78931	C15orf52, RNA5SP392	388115
211630_s_at	-0.888594	-0.155537	-8.81145	1.28707e-07	5.78587e-05	7.78396	GSS	2937
238647_at	-1.00252	-0.0804078	-8.81133	1.28731e-07	5.78587e-05	7.78377	C14orf28	122525
1554122_a_at	-1.66846	-0.237647	-8.80648	1.29704e-07	5.82385e-05	7.77613	HSD17B12	51144
200048_s_at	0.890649	0.186751	8.8038	1.30245e-07	5.84239e-05	7.7719	JTB	10899
201925_s_at	1.82296	0.765884	8.79892	1.31236e-07	5.88103e-05	7.76422	CD55	1604
210732_s_at	-1.32687	-0.203098	-8.79553	1.31929e-07	5.90628e-05	7.75887	LGALS8	3964
227959_at	2.4336	0.540776	8.79271	1.32508e-07	5.92534e-05	7.75443	ANKRD9	122416
203174_s_at	-0.895172	-0.139759	-8.79219	1.32616e-07	5.92534e-05	7.7536	ARFRP1	10139
214527_s_at	0.899248	0.112497	8.7908	1.32901e-07	5.93228e-05	7.75142	PQBP1	10084
210277_at	-1.41455	-0.242497	-8.78564	1.33972e-07	5.97421e-05	7.74328	AP4S1	11154
219222_at	-1.1875	-0.0905971	-8.78036	1.35077e-07	6.01759e-05	7.73494	RBKS	64080
212635_at	0.977641	0.350047	8.77951	1.35257e-07	6.01972e-05	7.73359	TNPO1	3842
231431_s_at	-0.969873	-0.265759	-8.77786	1.35604e-07	6.02926e-05	7.73099	INAFM2
211043_s_at	-0.881153	-0.243502	-8.77454	1.36306e-07	6.05456e-05	7.72575	CLTB	1212
222759_at	-0.993507	-0.141194	-8.7735	1.36528e-07	6.0585e-05	7.7241	KMT5B	51111
219458_s_at	-1.17337	-0.241098	-8.77202	1.36844e-07	6.06658e-05	7.72176	NSUN3	63899
235815_at	1.04567	0.110818	8.77022	1.37226e-07	6.06922e-05	7.71893	TSHZ2	128553
210286_s_at	2.15077	0.286111	8.77005	1.37263e-07	6.06922e-05	7.71865	SLC4A7	9497
240259_at	-2.62948	-0.688943	-8.76986	1.37304e-07	6.06922e-05	7.71835	FLRT2	23768
37986_at	0.904223	0.283979	8.76848	1.376e-07	6.0764e-05	7.71617	EPOR	2057
212215_at	-1.51896	-0.385871	-8.76617	1.38095e-07	6.09194e-05	7.71252	PREPL	9581
207571_x_at	1.87068	0.260192	8.76559	1.38219e-07	6.09194e-05	7.71161	THEMIS2	9473
220738_s_at	1.28837	0.221682	8.7646	1.38433e-07	6.09545e-05	7.71004	RPS6KA6	27330
204142_at	-0.922087	-0.317545	-8.76293	1.38794e-07	6.10544e-05	7.7074	ENOSF1	55556
219451_at	-1.24988	-0.144192	-8.76168	1.39065e-07	6.11146e-05	7.70541	MSRB2	22921
213348_at	2.31546	0.583943	8.76005	1.39418e-07	6.12106e-05	7.70284	CDKN1C	1028
239067_s_at	1.4778	0.485815	8.75831	1.39797e-07	6.12421e-05	7.70009	PANX2	56666
213540_at	-1.44777	-0.316887	-8.7581	1.39843e-07	6.12421e-05	7.69975	HSD17B8	7923
227236_at	-2.13117	-0.757612	-8.75783	1.39901e-07	6.12421e-05	7.69933	TSPAN2	10100
217880_at	0.828517	0.131271	8.75725	1.40029e-07	6.12421e-05	7.69841	CDC27	996
228135_at	0.873344	0.187156	8.75592	1.40318e-07	6.13095e-05	7.69632	C1orf52	148423
223774_at	2.49742	0.579893	8.75332	1.40889e-07	6.15001e-05	7.69219	SNORA16A, SNHG12	85028, 692073
222028_at	0.974869	0.263738	8.75176	1.41232e-07	6.15908e-05	7.68972	ZNF45	7596
1552701_a_at	-1.37267	-0.684666	-8.75063	1.41482e-07	6.16405e-05	7.68793	CARD16	114769
229352_at	1.28923	0.0563726	8.74993	1.41635e-07	6.16482e-05	7.68683	SPESP1	246777
228967_at	1.58939	0.532157	8.74812	1.42035e-07	6.17631e-05	7.68397	EIF1	10209
210570_x_at	0.971382	0.12669	8.7453	1.42663e-07	6.19747e-05	7.67949	MAPK9	5601
1566603_s_at	1.62253	0.34133	8.74445	1.42851e-07	6.19747e-05	7.67816	RPUSD3	285367
213555_at	-0.923531	-0.0988543	-8.7441	1.4293e-07	6.19747e-05	7.6776	RWDD2A	112611
214552_s_at	1.26977	0.165643	8.73676	1.44577e-07	6.26249e-05	7.66597	RABEP1	9135
214871_x_at	-1.13415	-0.257969	-8.73619	1.44705e-07	6.26249e-05	7.66507
219204_s_at	-0.819759	-0.218328	-8.73508	1.44957e-07	6.26742e-05	7.66331	SRR	63826
206569_at	3.53194	0.781696	8.73218	1.45614e-07	6.28987e-05	7.65871	IL24	11009
225414_at	0.873382	0.399076	8.73136	1.45801e-07	6.29197e-05	7.65741	RNF149	284996
203919_at	1.3295	0.0494375	8.72579	1.47075e-07	6.34092e-05	7.64858	TCEA2	6919
212847_at	-1.14448	-0.369112	-8.72325	1.47658e-07	6.36006e-05	7.64456
200864_s_at	-1.12594	-0.316199	-8.72177	1.48002e-07	6.36884e-05	7.6422	RAB11A	8766
223809_at	-1.81821	-0.381131	-8.71937	1.48558e-07	6.38671e-05	7.6384	RGS18	64407
227539_at	1.32876	0.33107	8.71618	1.49301e-07	6.41257e-05	7.63334
222686_s_at	-1.31683	-0.338961	-8.71495	1.49589e-07	6.4163e-05	7.63138	CPPED1	55313
200856_x_at	1.07491	0.209713	8.7146	1.4967e-07	6.4163e-05	7.63083	NCOR1	9611
236026_at	1.73818	0.320745	8.71283	1.50083e-07	6.42798e-05	7.62803	GPATCH2	55105
215867_x_at	2.05094	0.177755	8.71097	1.50522e-07	6.44069e-05	7.62507	CA12	771
225496_s_at	-1.64251	-0.581394	-8.70493	1.51951e-07	6.49574e-05	7.61548	SYTL2	54843
202305_s_at	-0.926767	-0.149588	-8.70377	1.52226e-07	6.50141e-05	7.61364	FEZ2	9637
204662_at	1.05519	0.0785989	8.70249	1.52532e-07	6.50836e-05	7.6116	CCP110	9738
218729_at	-1.85214	-0.408792	-8.70093	1.52905e-07	6.51815e-05	7.60912	LXN	56925
241393_at	-1.64324	-0.350284	-8.69707	1.53832e-07	6.55152e-05	7.60299	, IPP	3652
227904_at	-0.905099	-0.0607254	-8.69278	1.54869e-07	6.5895e-05	7.59617	AZI2	64343
214746_s_at	1.19752	0.117754	8.69009	1.55522e-07	6.60808e-05	7.5919	ZNF467	168544
227328_at	0.862441	0.239071	8.68979	1.55596e-07	6.60808e-05	7.59142	CAMTA1	23261
226209_at	-1.10396	-0.312704	-8.68381	1.5706e-07	6.66405e-05	7.58191	NDUFV3	4731
223515_s_at	-1.43041	-0.453357	-8.68258	1.57364e-07	6.67073e-05	7.57994	COQ3	51805
204994_at	-1.88473	-1.12084	-8.67828	1.58429e-07	6.70959e-05	7.5731	MX2	4600
202207_at	1.9631	0.368772	8.6762	1.58946e-07	6.72525e-05	7.56979	ARL4C	10123
225674_at	-0.802501	-0.12374	-8.67391	1.5952e-07	6.74323e-05	7.56613	BCAP29	55973
215084_s_at	0.679358	0.131214	8.67083	1.60292e-07	6.7696e-05	7.56123	LRRC42	115353
209980_s_at	1.50813	0.0564477	8.66935	1.60665e-07	6.77907e-05	7.55887	SHMT1	6470, 102466733
213970_at	-1.15047	-0.326363	-8.66621	1.61457e-07	6.80465e-05	7.55388	RABL3	285282
242317_at	-1.50225	-0.271254	-8.66576	1.61571e-07	6.80465e-05	7.55316
225439_at	-0.737946	-0.341657	-8.66351	1.62145e-07	6.8225e-05	7.54957	NUDCD1	84955
205770_at	2.18112	0.299392	8.66184	1.62568e-07	6.834e-05	7.54692	GSR	2936
223664_x_at	-1.07584	-0.363057	-8.65599	1.6407e-07	6.89078e-05	7.53758	BCL2L13	23786
224414_s_at	-0.991176	-0.101296	-8.64881	1.65932e-07	6.96252e-05	7.52613	CARD6	84674
50400_at	-1.86083	-0.266047	-8.6482	1.66091e-07	6.9628e-05	7.52515	PAOX	196743
231170_at	1.14728	0.222189	8.64485	1.66967e-07	6.99305e-05	7.51981	CDKL5	6792
203532_x_at	-1.16914	-0.252054	-8.64229	1.67642e-07	7.01488e-05	7.51571	CUL5	8065
214661_s_at	1.06678	-0.0315035	8.63715	1.69003e-07	7.06532e-05	7.50751	NOP14	8602
206831_s_at	-0.800014	-0.135498	-8.63646	1.69186e-07	7.06646e-05	7.50641	ARSD	414
228398_at	-2.06527	-0.559744	-8.6355	1.6944e-07	7.06954e-05	7.50488	SENP8	123228
40284_at	1.98697	0.410024	8.63502	1.6957e-07	7.06954e-05	7.50411	FOXA2	3170
209403_at	1.1999	0.383569	8.63232	1.70291e-07	7.09311e-05	7.4998	TBC1D3, TBC1D3K, TBC1D3L, TBC1D3F, TBC1D3D, TBC1D3I, TBC1D3P2, TBC1D3B, TBC1D3C, TBC1D3H, TBC1D3J, TBC1D3G, TBC1D3E	729873, 101060351, 102723859, 101060376, 84218, 101060389, 102724862, 414059, 414060, 729877, 101060321
225395_s_at	-0.956252	-0.0434001	-8.63153	1.70503e-07	7.09542e-05	7.49854	FAM120AOS	158293
222199_s_at	-0.768378	-0.0788605	-8.63059	1.70756e-07	7.09944e-05	7.49703	BIN3	55909
211717_at	0.80963	0.101707	8.62892	1.71206e-07	7.10649e-05	7.49436	ANKRD40	91369
202704_at	0.945054	0.232049	8.62835	1.71358e-07	7.10649e-05	7.49346	TOB1	10140
203661_s_at	1.44678	0.368841	8.62822	1.71394e-07	7.10649e-05	7.49324	TMOD1	7111
222998_at	1.1866	0.308873	8.62561	1.72099e-07	7.12925e-05	7.48907	MAF1	84232
1554795_a_at	2.01987	0.508273	8.62154	1.73206e-07	7.16857e-05	7.48256	FBLIM1	54751
230575_at	-1.33634	-0.166509	-8.61408	1.75252e-07	7.24666e-05	7.47064	MSRB2	22921
226771_at	2.24786	0.283206	8.61149	1.7597e-07	7.26971e-05	7.46649	ATP8B2	57198
229814_at	1.50174	0.502474	8.6109	1.76135e-07	7.26995e-05	7.46554	TNFAIP8	25816
224823_at	-2.95923	-1.58721	-8.60329	1.7826e-07	7.35097e-05	7.45336	MYLK	4638
228464_at	1.33497	0.228285	8.60225	1.78552e-07	7.35637e-05	7.4517	MIR3685	100500802
213469_at	1.20961	-0.00768974	8.59953	1.79321e-07	7.38135e-05	7.44734	PGAP1	80055
222610_s_at	1.37766	0.223773	8.5959	1.80352e-07	7.41707e-05	7.44152	S100PBP	64766
226867_at	1.14706	0.236409	8.59181	1.8152e-07	7.45524e-05	7.43496	DENND4C	55667
238030_at	-1.74371	-0.29175	-8.5915	1.81608e-07	7.45524e-05	7.43447	ZNF268	10795
228983_at	0.916468	0.290956	8.59012	1.82005e-07	7.4648e-05	7.43225	NCBP3	55421
224780_at	1.35973	0.193804	8.5863	1.83106e-07	7.49094e-05	7.42613	RBM17	84991
201526_at	-0.925377	-0.224964	-8.58628	1.83111e-07	7.49094e-05	7.4261	FSCN3, ARF5	29999, 381
230728_at	1.0819	0.137371	8.58619	1.83136e-07	7.49094e-05	7.42596	FKBP14	55033
214059_at	-1.75169	-1.32105	-8.58396	1.83783e-07	7.50446e-05	7.42238	IFI44	10561
224694_at	2.28387	0.220801	8.58391	1.83797e-07	7.50446e-05	7.4223	ANTXR1	84168
201278_at	2.0435	0.698998	8.58325	1.83989e-07	7.50556e-05	7.42124	DAB2	1601
224336_s_at	0.933921	0.184861	8.58072	1.84725e-07	7.52883e-05	7.41719	DUSP16	80824
225864_at	1.45851	0.506438	8.57933	1.85133e-07	7.53873e-05	7.41495	FAM84B	157638
229500_at	-0.885694	-0.267131	-8.57722	1.8575e-07	7.55133e-05	7.41157	SLC30A9	10463
238710_at	-1.15994	-0.113505	-8.57702	1.8581e-07	7.55133e-05	7.41124	TMEM86A	144110
233198_at	1.28273	0.214248	8.57657	1.85941e-07	7.55133e-05	7.41053	GOLGA2P5	55592
228763_at	-1.89712	-0.382223	-8.57317	1.86943e-07	7.58526e-05	7.40507	NEDD8-MDP1, , MDP1	145553
1554740_a_at	-1.3942	-0.234057	-8.57135	1.87481e-07	7.60032e-05	7.40215	IPP	3652
200959_at	-1.92216	-0.543331	-8.56765	1.88581e-07	7.63811e-05	7.39621	FUS	2521
242103_at	-1.14031	-0.150297	-8.56401	1.89673e-07	7.67548e-05	7.39035	TMEM86A	144110
204012_s_at	-1.46036	-0.23288	-8.56249	1.90128e-07	7.68704e-05	7.38791	LCMT2	9836
223269_at	-1.21975	-0.290649	-8.56029	1.90792e-07	7.70705e-05	7.38437	, POLR3GL	84265
1555971_s_at	-0.950085	-0.0971244	-8.55901	1.91177e-07	7.71152e-05	7.38232	FBXO28	23219
239136_at	1.39616	0.209357	8.5588	1.91242e-07	7.71152e-05	7.38198	UNC5B-AS1	728978
218830_at	-0.990006	-0.314724	-8.5579	1.91515e-07	7.7157e-05	7.38053	RPL26L1, RPL26P30	51121
222682_s_at	-1.50446	-0.24681	-8.55689	1.91822e-07	7.71958e-05	7.3789	FAM114A2	10827
204235_s_at	1.63376	0.713869	8.55646	1.91951e-07	7.71958e-05	7.37822	GULP1	51454
218699_at	1.17061	0.134317	8.55228	1.93226e-07	7.76402e-05	7.3715	RAB29	8934
205780_at	1.13412	0.322862	8.54747	1.94705e-07	7.81651e-05	7.36376	BIK	638
205486_at	1.27296	0.0728826	8.54347	1.9594e-07	7.85404e-05	7.35733	TESK2	10420
227330_x_at	0.906034	0.184303	8.54333	1.95985e-07	7.85404e-05	7.3571	, TEKT4P2, MAFIP	105379554, 100132288, 100233156
212133_at	0.755872	0.229503	8.54233	1.96297e-07	7.85961e-05	7.35548	NIPA2	81614
210758_at	1.4969	0.127412	8.53933	1.9723e-07	7.89003e-05	7.35067	PSIP1	11168
219806_s_at	1.52909	0.169834	8.5335	1.99063e-07	7.95564e-05	7.34127	SMCO4	56935
213523_at	1.21361	0.231486	8.5326	1.99347e-07	7.95564e-05	7.33982	CCNE1	898
210555_s_at	1.75845	0.150173	8.53245	1.99395e-07	7.95564e-05	7.33958	NFATC3	4775
217165_x_at	0.810378	0.138165	8.53025	2.0009e-07	7.97641e-05	7.33604	MT1F	4494
225602_at	-2.25987	-0.460011	-8.52773	2.00891e-07	8.00131e-05	7.33199	GLIPR2	152007
207030_s_at	2.1578	0.219715	8.52599	2.01449e-07	8.0165e-05	7.32917	CSRP2	1466
204365_s_at	-2.69272	-0.321766	-8.52338	2.02283e-07	8.04139e-05	7.32498	REEP1	65055
223592_s_at	0.79933	0.22434	8.52293	2.02428e-07	8.04139e-05	7.32425	RNF135	84282
212561_at	1.41281	0.21935	8.5219	2.02759e-07	8.04754e-05	7.32259	DENND5A	23258
1560579_s_at	1.2507	0.378764	8.51953	2.03522e-07	8.07076e-05	7.31877	SLC16A1-AS1,	100506392
241708_at	-1.03985	-0.291017	-8.51756	2.04161e-07	8.08646e-05	7.31559	DOCK1	1793
210200_at	-0.891616	0.0129475	-8.51721	2.04273e-07	8.08646e-05	7.31503	WWP2	11060
215789_s_at	1.99084	0.309091	8.5159	2.047e-07	8.09563e-05	7.31291	AJAP1	55966
226474_at	-1.35793	-0.404212	-8.5154	2.04861e-07	8.09563e-05	7.31211	NLRC5	84166
238686_at	-1.2232	-0.204107	-8.5127	2.05743e-07	8.11856e-05	7.30775	FBXO3	26273
203192_at	1.13807	0.174557	8.51253	2.05798e-07	8.11856e-05	7.30748	ABCB6, ATG9A	10058, 79065
220585_at	0.996073	0.206321	8.51101	2.06297e-07	8.13118e-05	7.30502	HKDC1	80201
209625_at	1.09867	0.233481	8.50847	2.0713e-07	8.15121e-05	7.30092	PIGH	5283
206924_at	2.5445	0.496292	8.50837	2.07163e-07	8.15121e-05	7.30076	IL11	3589
202657_s_at	1.24706	0.358052	8.50472	2.08368e-07	8.19151e-05	7.29487	SERTAD2	9792
222902_s_at	-1.21608	-0.235099	-8.50209	2.09241e-07	8.20611e-05	7.29063	EXO5	64789
203584_at	-1.03338	-0.230853	-8.50192	2.09298e-07	8.20611e-05	7.29035	EMC2	9694
238653_at	1.05045	0.331946	8.50173	2.0936e-07	8.20611e-05	7.29005	LRIG2	9860
211750_x_at	-0.874323	-0.197853	-8.50143	2.09461e-07	8.20611e-05	7.28956	TUBA1C	84790
204001_at	-0.976984	-0.119792	-8.49991	2.09968e-07	8.21888e-05	7.2871	SNAPC3	6619
225099_at	0.766431	0.241301	8.49932	2.10165e-07	8.21954e-05	7.28615	FBXO45	200933
219072_at	-0.87506	-0.207286	-8.49696	2.10953e-07	8.24325e-05	7.28235	BCL7C	9274
203008_x_at	-1.04367	-0.142964	-8.49635	2.11158e-07	8.2442e-05	7.28136	TXNDC9	10190
221605_s_at	-0.907941	-0.26893	-8.49532	2.11504e-07	8.24506e-05	7.2797	PIPOX	51268
209992_at	1.67533	0.431046	8.49521	2.11543e-07	8.24506e-05	7.27951	PFKFB2	5208
231192_at	1.23815	0.151602	8.49196	2.12639e-07	8.28035e-05	7.27426	LPAR3	23566
228721_at	-1.46401	-0.434903	-8.49145	2.12812e-07	8.28035e-05	7.27343	KRBOX1,	100506243
226140_s_at	1.77838	0.249493	8.48963	2.13428e-07	8.29721e-05	7.2705	OTUD1	220213
204034_at	-0.937055	-0.168588	-8.48593	2.14688e-07	8.33907e-05	7.26452	ETHE1	23474
215790_at	1.33093	0.264336	8.48501	2.15005e-07	8.34424e-05	7.26302	AJAP1	55966
46256_at	0.839801	0.225435	8.48358	2.15492e-07	8.35603e-05	7.26072	SPSB3	90864
204000_at	0.774137	0.183011	8.48208	2.16007e-07	8.36885e-05	7.2583	GNB5	10681
231832_at	-1.2286	-0.0846153	-8.47862	2.17203e-07	8.40804e-05	7.25269	GALNT4, POC1B-GALNT4	8693, 100528030
201169_s_at	1.54443	0.294592	8.47805	2.17398e-07	8.40842e-05	7.25178	BHLHE40	8553
201524_x_at	-0.689295	-0.151438	-8.47516	2.18402e-07	8.43665e-05	7.2471	UBE2N	7334
226234_at	1.23356	-0.0149999	8.4748	2.18525e-07	8.43665e-05	7.24653	GDF11	10220
229748_x_at	0.86135	0.161971	8.47435	2.18684e-07	8.43665e-05	7.24579	, TEKT4P2, MAFIP	105379554, 100132288, 100233156
219094_at	-1.03252	-0.253541	-8.47322	2.19076e-07	8.44462e-05	7.24397	ARMC8	25852
214440_at	-1.72332	-0.478664	-8.47146	2.19693e-07	8.46123e-05	7.24111	NAT1	9
202748_at	-1.9504	-0.804269	-8.46795	2.20926e-07	8.49246e-05	7.23543	GBP2	2634
201779_s_at	0.913173	0.244285	8.46788	2.2095e-07	8.49246e-05	7.23531	RNF13	11342
222812_s_at	1.98507	0.795331	8.46755	2.21064e-07	8.49246e-05	7.23479	RHOF	54509
208616_s_at	0.781009	0.251799	8.46671	2.21364e-07	8.49678e-05	7.23342	PTP4A2	8073
238649_at	1.15646	0.520764	8.46573	2.21707e-07	8.50278e-05	7.23184	PITPNC1	26207
201415_at	-0.908078	-0.120596	-8.46459	2.22111e-07	8.51111e-05	7.22999	GSS	2937
201780_s_at	0.786221	0.214739	8.46223	2.2295e-07	8.52892e-05	7.22616	RNF13	11342
227124_at	0.845744	0.358568	8.46216	2.22974e-07	8.52892e-05	7.22605	SMIM13	221710
226242_at	-1.32416	-0.389839	-8.4617	2.23138e-07	8.52892e-05	7.2253	C1orf131	128061
235114_x_at	-0.934224	-0.18523	-8.45893	2.24126e-07	8.55947e-05	7.22082	HOOK3	84376
228595_at	-1.30581	-0.241227	-8.45826	2.24364e-07	8.56137e-05	7.21974
201853_s_at	1.76256	0.280589	8.45342	2.26103e-07	8.62049e-05	7.2119	CDC25B	994
202561_at	0.949577	0.155565	8.45208	2.26589e-07	8.6318e-05	7.20971	TNKS	8658
239324_at	0.71066	0.207655	8.45124	2.2689e-07	8.63604e-05	7.20836
200609_s_at	-1.29713	-0.23803	-8.44954	2.27508e-07	8.6523e-05	7.2056	WDR1	9948
203620_s_at	1.03413	0.138469	8.4478	2.2814e-07	8.66911e-05	7.20278	FCHSD2	9873
222566_at	1.13403	0.292527	8.44619	2.28728e-07	8.68419e-05	7.20017	KMT5B	51111
227488_at	-0.984386	-0.255837	-8.44466	2.29285e-07	8.69808e-05	7.1977	MIR503, MIR503HG	574506, 84848, 494336
38290_at	1.10653	0.152118	8.44411	2.29489e-07	8.69855e-05	7.1968	RGS14	10636
222148_s_at	1.01241	0.156922	8.43556	2.32645e-07	8.81085e-05	7.18292	RHOT1	55288
57540_at	-1.62608	-0.170931	-8.43273	2.33699e-07	8.83691e-05	7.17833	RBKS	64080
217981_s_at	-0.735873	-0.072906	-8.43267	2.33722e-07	8.83691e-05	7.17823	TIMM10B	26515
203542_s_at	1.47281	0.510166	8.43041	2.34568e-07	8.86153e-05	7.17456	KLF9	687
218386_x_at	-0.823129	-0.114371	-8.42438	2.36839e-07	8.93988e-05	7.16477	USP16	10600
221772_s_at	0.967459	0.19633	8.42323	2.37274e-07	8.94891e-05	7.1629	PPP2R2D	55844
1552684_a_at	-1.80429	-0.426462	-8.42082	2.38189e-07	8.97598e-05	7.15899	SENP8	123228
1555881_s_at	1.10558	0.228824	8.42015	2.38448e-07	8.97828e-05	7.15789	LZTS2	84445
224558_s_at	-1.19065	-0.173079	-8.41958	2.38663e-07	8.97894e-05	7.15697	, MALAT1	378938
213637_at	1.36215	0.284003	8.41543	2.40255e-07	9.02863e-05	7.15022	DDX52	11056
204182_s_at	1.0201	0.271293	8.4151	2.40381e-07	9.02863e-05	7.14969	ZBTB43	23099
228234_at	1.26834	0.317584	8.40661	2.4367e-07	9.14463e-05	7.13588	TMED7-TICAM2, TICAM2	100302736, 353376
218973_at	1.50886	0.55466	8.40203	2.45466e-07	9.19862e-05	7.12842	EFL1	79631
202430_s_at	-1.03074	-0.57746	-8.40144	2.45696e-07	9.19862e-05	7.12746	PLSCR1	5359
226202_at	1.48862	0.476305	8.40139	2.45715e-07	9.19862e-05	7.12738	ZNF398	57541
220672_at	2.30419	0.574144	8.40075	2.45967e-07	9.20047e-05	7.12634	PPP4R4	57718
225407_at	0.81361	0.142564	8.4	2.46264e-07	9.204e-05	7.12512	MBP	4155
228503_at	2.08283	0.391968	8.398	2.47053e-07	9.2259e-05	7.12187	RPS6KA6	27330
200621_at	-1.45509	-0.348918	-8.39533	2.48115e-07	9.25796e-05	7.11751	CSRP1	1465
203554_x_at	1.5129	-0.292515	8.39175	2.4954e-07	9.30352e-05	7.11169	PTTG1	9232
210512_s_at	2.05663	0.62764	8.38947	2.50453e-07	9.3299e-05	7.10798	VEGFA	7422
200729_s_at	-0.660083	-0.1923	-8.38768	2.51176e-07	9.34917e-05	7.10505	ACTR2	10097
212611_at	1.50339	0.309284	8.38667	2.51582e-07	9.35664e-05	7.10341	DTX4	23220
213387_at	1.06111	0.197854	8.38407	2.52633e-07	9.38803e-05	7.09918	ATAD2B	54454
209989_at	-1.84228	-0.333346	-8.38262	2.53221e-07	9.40221e-05	7.09681	ZNF268	10795
227963_at	1.6086	0.360979	8.37664	2.55664e-07	9.48519e-05	7.08706
229903_x_at	-1.39439	-0.205295	-8.37609	2.55889e-07	9.48579e-05	7.08616	RNPC3	55599
227035_x_at	0.705675	0.143393	8.37541	2.56168e-07	9.48841e-05	7.08505	RP9P, RP9	441212, 6100
214164_x_at	1.9881	0.15693	8.37448	2.5655e-07	9.49483e-05	7.08354	CA12	771
231145_at	1.46239	0.207106	8.37363	2.56902e-07	9.50011e-05	7.08215	PAX9	5083
208453_s_at	-0.776116	-0.249448	-8.37204	2.57556e-07	9.51656e-05	7.07956	XPNPEP1	7511
33494_at	1.4649	0.303218	8.36972	2.58519e-07	9.54144e-05	7.07577	ETFDH	2110
215984_s_at	-1.43179	-0.264792	-8.36941	2.58649e-07	9.54144e-05	7.07526	ARFRP1	10139
203375_s_at	-0.78058	-0.133305	-8.36855	2.59006e-07	9.54688e-05	7.07386	TPP2	7174
213359_at	1.15738	0.255663	8.36203	2.61734e-07	9.63332e-05	7.06321	HNRNPD	3184
222500_at	-1.33151	-0.276404	-8.36193	2.61775e-07	9.63332e-05	7.06305	PPIL1	51645
210409_at	-1.30865	-0.134457	-8.35921	2.62922e-07	9.66576e-05	7.05861	MLLT4-AS1	653483
229269_x_at	1.32842	0.176162	8.35829	2.6331e-07	9.66576e-05	7.05711	SSBP4	170463
239719_at	0.909122	0.226612	8.35793	2.63464e-07	9.66576e-05	7.05652	CD109	135228
228155_at	1.86976	0.345366	8.35783	2.63506e-07	9.66576e-05	7.05636	FAM213A	84293
201323_at	-0.946979	-0.289587	-8.3572	2.6377e-07	9.66765e-05	7.05534	EBNA1BP2	10969, 102465439
212834_at	1.26664	0.227938	8.35611	2.64234e-07	9.67684e-05	7.05355	DDX52	11056
201288_at	-1.60422	-0.772865	-8.35399	2.65135e-07	9.70202e-05	7.05009	ARHGDIB	397
224832_at	0.853225	0.260873	8.3525	2.65774e-07	9.71246e-05	7.04765	DUSP16	80824
213223_at	0.85038	0.201227	8.35233	2.65847e-07	9.71246e-05	7.04737	RPL28	6158, 102465483
37996_s_at	1.04719	0.192237	8.34806	2.67679e-07	9.76536e-05	7.04039	DMPK	1760
224587_at	-1.72227	-0.404227	-8.34795	2.67724e-07	9.76536e-05	7.04022	SUB1	10923
226652_at	1.05387	0.217723	8.34188	2.70351e-07	9.85327e-05	7.03029	USP3	9960
242281_at	-1.91911	-0.551448	-8.33532	2.73221e-07	9.94988e-05	7.01956	GLUL	2752
1554047_at	-0.749995	-0.194789	-8.33377	2.73905e-07	9.96683e-05	7.01702	TXNDC9	10190
218548_x_at	0.731186	0.132573	8.32982	2.75651e-07	0.000100223	7.01057	TEX264	51368
200893_at	-1.43294	-0.280795	-8.32621	2.7726e-07	0.000100728	7.00465	TRA2B	6434
233348_at	-0.9232	-0.0982151	-8.32284	2.78769e-07	0.000101195	6.99913
219394_at	1.20202	0.329581	8.32171	2.7928e-07	0.0001013	6.99727	PGS1	9489
223279_s_at	-1.24979	-0.252502	-8.3208	2.79688e-07	0.000101367	6.99579	UACA	55075
233506_at	-1.11122	0.0876844	-8.31189	2.83733e-07	0.000102751	6.9812	BZW1	9689
32088_at	-1.18063	-0.0788095	-8.30739	2.85801e-07	0.000103418	6.97382	BLZF1	8548
244030_at	-0.957793	-0.422829	-8.30657	2.86183e-07	0.000103474	6.97246	STYX	6815
203457_at	-0.666057	-0.116937	-8.30147	2.88547e-07	0.000104178	6.9641
1552470_a_at	-1.13209	-0.306319	-8.30138	2.8859e-07	0.000104178	6.96395	ABHD11	83451
243507_s_at	-1.37676	-0.209422	-8.29929	2.89562e-07	0.000104351	6.96053	C20orf196	149840
211675_s_at	-1.13251	-0.295013	-8.29927	2.89573e-07	0.000104351	6.96049	MDFIC	29969
206992_s_at	-1.16374	-0.270951	-8.29888	2.89757e-07	0.000104351	6.95984	ATP5S	27109
212465_at	0.708125	0.0806572	8.29723	2.90528e-07	0.000104546	6.95714	SETD3	84193
200719_at	-1.00939	-0.249436	-8.29528	2.91444e-07	0.000104754	6.95394	SKP1	6500
222000_at	0.779333	0.0691979	8.29502	2.91567e-07	0.000104754	6.95352	C1orf174	339448
235647_at	-1.1994	-0.120333	-8.29244	2.92787e-07	0.00010511	6.94927	AP4S1	11154
224599_at	1.11854	0.206287	8.29056	2.93675e-07	0.000105285	6.94619	CGGBP1	8545
201920_at	2.13631	0.710191	8.29043	2.9374e-07	0.000105285	6.94597	SLC20A1	6574
220524_at	-0.952469	-0.166698	-8.28851	2.9465e-07	0.000105528	6.94283
212246_at	-1.14617	-0.0903371	-8.28612	2.95789e-07	0.000105853	6.9389	MCFD2	90411
226240_at	0.824068	0.256834	8.28393	2.9684e-07	0.000106146	6.9353	TADA2B	93624
232004_at	1.32719	0.213668	8.282	2.97767e-07	0.000106393	6.93213	HNRNPR	10236
227352_at	-1.29545	-0.305504	-8.27597	3.00684e-07	0.000107351	6.92222	SWSAP1	126074
235746_s_at	1.38759	0.332783	8.2754	3.0096e-07	0.000107366	6.92129	PLA2R1	22925
204053_x_at	0.985302	0.240937	8.27288	3.0219e-07	0.000107655	6.91714	PTENP1, PTEN	11191, 5728
218180_s_at	-1.06219	-0.181288	-8.27277	3.02244e-07	0.000107655	6.91696	EPS8L2	64787
206907_at	1.75844	0.319424	8.27201	3.02617e-07	0.000107703	6.91571	TNFSF9	8744
211937_at	0.771377	0.153388	8.27055	3.03332e-07	0.000107874	6.91331	EIF4B, EIF4BP3, EIF4BP6, EIF4BP7	1975
221881_s_at	-1.39824	-0.293211	-8.26979	3.03706e-07	0.00010788	6.91205	CLIC4, CLIC4P1	25932
217584_at	1.65523	0.567466	8.26955	3.03825e-07	0.00010788	6.91166	NPC1	4864
1557961_s_at	1.37935	0.184979	8.26707	3.05044e-07	0.000108228	6.90759	C8orf88	100127983
202919_at	-1.08317	-0.208807	-8.26645	3.0535e-07	0.000108253	6.90657	MOB4	25843
219695_at	-1.03238	-0.0924756	-8.26568	3.05731e-07	0.000108303	6.9053	SMPD3	55512
206710_s_at	-2.6187	-0.495649	-8.26495	3.06097e-07	0.000108348	6.90408	EPB41L3	23136
201180_s_at	-0.706588	-0.123147	-8.24883	3.14192e-07	0.00011109	6.87755	GNAI3	2773, 406974
209251_x_at	-0.810408	-0.184701	-8.24856	3.14332e-07	0.00011109	6.8771	TUBA1C	84790
238962_at	-0.919432	-0.299426	-8.24472	3.16293e-07	0.000111697	6.87078	ZNF681	148213
48659_at	0.729078	0.101545	8.24224	3.17568e-07	0.000112035	6.86669	MIIP	60672
214358_at	-1.04711	-0.142332	-8.2419	3.17745e-07	0.000112035	6.86612	ACACA	31
225183_at	1.00662	0.473754	8.23891	3.19289e-07	0.000112493	6.8612	C16orf72	29035
227731_at	1.42194	0.256337	8.23742	3.20061e-07	0.000112677	6.85874
226111_s_at	0.958567	0.136787	8.23664	3.20464e-07	0.000112732	6.85746	ZNF385A	25946
205483_s_at	-1.77085	-1.07962	-8.23558	3.21017e-07	0.000112839	6.85571	ISG15	9636
207206_s_at	-1.15194	-0.213781	-8.23458	3.21537e-07	0.000112935	6.85406	ALOX12	239
225092_at	0.972759	0.147987	8.23328	3.22218e-07	0.000113087	6.85191	RABEP1	9135
230277_at	1.50107	0.311049	8.23156	3.2312e-07	0.000113298	6.84907
227764_at	0.950761	-0.251604	8.23116	3.23326e-07	0.000113298	6.84842	LYPD6	130574
204143_s_at	-0.894196	-0.292972	-8.23039	3.23733e-07	0.000113298	6.84714	ENOSF1	55556
232116_at	1.73201	0.441072	8.23023	3.23816e-07	0.000113298	6.84688	GRHL3	57822
208581_x_at	0.653549	0.103544	8.22553	3.26295e-07	0.000114078	6.83913	MT1X	4501
200757_s_at	0.812799	0.192701	8.22037	3.29045e-07	0.000114951	6.8306	CALU	813
1558292_s_at	-2.11108	-0.488211	-8.21955	3.29484e-07	0.000115015	6.82924	PIGW	284098
220206_at	-1.04236	-0.281226	-8.21765	3.30498e-07	0.000115281	6.82612	ZMYM1	79830
229838_at	1.34118	0.384247	8.21453	3.32181e-07	0.000115779	6.82096	NUCB2	4925, 105376575
218646_at	-0.925329	-0.264245	-8.21119	3.33987e-07	0.00011632	6.81544	HPF1	54969
232425_at	1.02247	0.154613	8.21031	3.34464e-07	0.000116384	6.81399	SNX25	83891
1557081_at	-1.53802	-0.362015	-8.20991	3.34685e-07	0.000116384	6.81332	RBM25	58517
223564_s_at	1.25437	0.297934	8.20874	3.3532e-07	0.000116459	6.81139	GNB1L	54584
227027_at	1.33216	0.596719	8.20858	3.3541e-07	0.000116459	6.81112	GFPT1	2673
235071_at	-1.33394	-0.391658	-8.20667	3.36452e-07	0.000116731	6.80797	WDR92,	116143
201192_s_at	-0.869297	-0.195158	-8.20401	3.37912e-07	0.000117148	6.80357	PITPNA	5306
209123_at	-1.43143	-0.484586	-8.20016	3.40032e-07	0.000117792	6.79721	QDPR	5860
220254_at	0.940531	0.180865	8.19971	3.40285e-07	0.000117792	6.79645	LRP12	29967
202326_at	1.68058	0.264229	8.19767	3.41411e-07	0.000118041	6.79309	EHMT2	10919
204567_s_at	1.68115	1.03074	8.19747	3.41524e-07	0.000118041	6.79276	ABCG1	9619
220049_s_at	-1.12435	-0.51397	-8.19647	3.42079e-07	0.000118143	6.79111	PDCD1LG2	80380
228482_at	1.32948	0.371147	8.19056	3.45388e-07	0.000119195	6.78132	TVP23C-CDRT4, CDRT4	100533496, 284040
217104_at	1.18673	0.272014	8.18984	3.45792e-07	0.000119244	6.78013	ST20	400410
208933_s_at	0.907705	0.260831	8.18576	3.48097e-07	0.000119948	6.77337	LGALS8	3964
217938_s_at	0.764617	0.271507	8.18257	3.49909e-07	0.000120481	6.7681	KCMF1	56888
230082_at	2.17156	0.600701	8.17538	3.54038e-07	0.000121785	6.75617	UBE2FP1
222976_s_at	-0.822439	-0.123098	-8.17504	3.54231e-07	0.000121785	6.75562	TPM3P8, TPM3	7170
201631_s_at	0.99221	0.430595	8.17108	3.56528e-07	0.000122482	6.74904	IER3	8870
225086_at	-1.15786	-0.347471	-8.16461	3.60309e-07	0.000123688	6.73832	FAM98B	283742
200713_s_at	-0.711439	-0.16482	-8.16348	3.60976e-07	0.000123823	6.73644	MAPRE1	22919
226822_at	1.11944	0.280282	8.15969	3.63211e-07	0.000124496	6.73016	STOX2	56977
203512_at	0.836977	0.131259	8.15721	3.64687e-07	0.000124908	6.72604	TRAPPC3	27095
226583_at	1.45748	0.295522	8.15567	3.65605e-07	0.000125128	6.72348	C12orf76	400073
211672_s_at	-1.20185	-0.259225	-8.1545	3.66302e-07	0.000125212	6.72154	ARPC4-TTLL3, ARPC4	100526693, 10093
222490_at	1.33096	0.163266	8.15434	3.66401e-07	0.000125212	6.72127	POLR3E	55718, 101060521
205327_s_at	-0.806768	-0.124716	-8.15373	3.66767e-07	0.000125243	6.72026	ACVR2A	92
225403_at	-0.999402	-0.15544	-8.15241	3.67554e-07	0.000125417	6.71808	RPP25L	138716
227235_at	-2.00561	-0.503891	-8.15093	3.68444e-07	0.000125627	6.71562
224473_x_at	1.02656	0.21647	8.14996	3.69029e-07	0.000125732	6.714	LZTS2	84445
226280_at	0.916867	0.197728	8.14796	3.70235e-07	0.000126049	6.71069	BNIP2	663
206371_at	2.32418	0.671738	8.14452	3.72326e-07	0.000126666	6.70496	FOLR3	2352
203038_at	-1.03753	-0.375228	-8.14359	3.72888e-07	0.000126762	6.70343	PTPRK	5796
229872_s_at	1.24392	0.274745	8.14171	3.74035e-07	0.000127057	6.7003		100996720
228571_at	0.856688	0.189781	8.13743	3.76663e-07	0.000127838	6.69318	RBAK	57786
238498_at	1.25606	0.207939	8.13659	3.77178e-07	0.000127838	6.6918
201855_s_at	1.02078	0.342005	8.13659	3.77179e-07	0.000127838	6.69179	ATMIN	23300
226558_at	-1.88763	-0.255398	-8.13182	3.80132e-07	0.000128744	6.68386
219716_at	-1.23528	-0.265827	-8.12688	3.83219e-07	0.000129692	6.67564	APOL6	80830
222041_at	-0.896083	-0.0761741	-8.1251	3.84335e-07	0.000129973	6.67268	OVCA2, DPH1	124641, 1801
230179_at	0.935475	0.0984656	8.12343	3.8539e-07	0.000130233	6.6699	GFOD1	54438
241014_at	1.94827	0.270802	8.12261	3.85903e-07	0.00013031	6.66854	FLG-AS1	339400
218992_at	-1.52462	-0.269535	-8.12057	3.87199e-07	0.000130649	6.66513	PLGRKT	55848
211547_s_at	-1.28734	-0.332279	-8.12012	3.8748e-07	0.000130649	6.66439	PAFAH1B1	5048
229428_at	-1.34082	-0.298044	-8.11707	3.89421e-07	0.000131206	6.65931	TIMM23B	100652748
226707_at	-1.71877	-0.219779	-8.11472	3.90925e-07	0.000131615	6.65539	NAPRT	93100
203098_at	0.846985	0.259999	8.11415	3.9129e-07	0.00013164	6.65444	CDYL	9425
214104_at	0.897644	0.177117	8.11268	3.92233e-07	0.00013186	6.652	GPR161	23432
1554616_at	-0.997761	-0.171277	-8.11135	3.93091e-07	0.000132051	6.64978	SERPINB8	5271
232287_at	-0.911502	-0.0389587	-8.10774	3.95422e-07	0.000132736	6.64376	PGBD3, ERCC6	267004, 2074
225978_at	-2.17592	-0.600737	-8.10689	3.95971e-07	0.000132814	6.64235	RIMKLB	57494
202674_s_at	-1.00492	-0.170043	-8.10648	3.96239e-07	0.000132814	6.64166	LMO7	4008
221551_x_at	1.79359	0.387909	8.09585	4.03202e-07	0.000135048	6.62395	ST6GALNAC4	27090
210986_s_at	-1.75275	-0.673322	-8.09397	4.04445e-07	0.000135365	6.62082	TPM1	7168
213820_s_at	-1.17257	-0.54126	-8.09301	4.05086e-07	0.00013548	6.61921	STARD5	80765
213425_at	2.19167	0.592488	8.09095	4.06456e-07	0.000135838	6.61578	WNT5A	7474
215294_s_at	1.15346	-0.038975	8.08867	4.07977e-07	0.000136247	6.61198	SMARCA1	6594
209171_at	-0.996566	-0.22007	-8.08813	4.0834e-07	0.000136263	6.61107	ITPA	3704
223013_at	0.669399	0.169536	8.08771	4.08627e-07	0.000136263	6.61036	TBL1XR1	79718
204039_at	1.42602	0.403468	8.08051	4.13484e-07	0.000137782	6.59834	CEBPA	1050
228365_at	1.2661	0.36982	8.07795	4.15225e-07	0.000138118	6.59407	CPNE8	144402
1554121_at	-0.991254	-0.101866	-8.07792	4.15248e-07	0.000138118	6.59401	HSD17B12	51144
1558631_at	1.07203	0.150575	8.07769	4.15402e-07	0.000138118	6.59363	PPARA	5465
228139_at	-1.1093	0.0573929	-8.07685	4.15976e-07	0.000138208	6.59223	RIPK3	11035
218705_s_at	-0.773004	-0.179035	-8.07422	4.17773e-07	0.000138703	6.58785	SNX24	28966
1555041_a_at	-1.52227	-0.368162	-8.0727	4.1882e-07	0.000138896	6.5853	NAGA	4668
221992_at	1.13244	0.357801	8.0722	4.19166e-07	0.000138896	6.58446	NPIPB6, NPIPB15	728741, 440348
227804_at	-1.47208	-0.32441	-8.07205	4.1927e-07	0.000138896	6.58421	TLCD1	116238
209780_at	1.21957	0.182267	8.07073	4.20179e-07	0.000138939	6.58201	PHTF2	57157
202659_at	-1.05794	-0.330751	-8.07039	4.20414e-07	0.000138939	6.58144	, PSMB10	5699
55616_at	-0.788138	-0.112274	-8.07031	4.2047e-07	0.000138939	6.5813	PGAP3	93210
242224_at	1.49482	0.312972	8.07009	4.20622e-07	0.000138939	6.58094	GPATCH2	55105
1552767_a_at	1.74955	0.224137	8.06944	4.21072e-07	0.000138987	6.57985	HS6ST2	90161
205541_s_at	-1.0112	-0.291282	-8.06621	4.23309e-07	0.000139624	6.57446	GSPT2	23708
225154_at	-0.657247	-0.177492	-8.06508	4.24102e-07	0.000139717	6.57256	SYAP1	94056
223591_at	0.854518	0.200384	8.06493	4.24206e-07	0.000139717	6.57231	RNF135	84282
1554894_a_at	-1.36168	-0.337383	-8.06287	4.25643e-07	0.000140089	6.56887	PCBD2	84105
203963_at	2.05536	0.182263	8.05587	4.30573e-07	0.000141609	6.55715	CA12	771
220761_s_at	0.695417	0.11201	8.05195	4.33355e-07	0.000142421	6.55061	TAOK3	51347
211077_s_at	1.29404	0.405236	8.05015	4.34643e-07	0.000142741	6.54759	TLK1	9874
209975_at	0.860152	0.237473	8.04775	4.36366e-07	0.000143204	6.54356	CYP2E1	1571
1558293_at	-1.5404	-0.331036	-8.04724	4.36729e-07	0.000143219	6.54272
203615_x_at	0.904992	0.228335	8.0464	4.37337e-07	0.000143316	6.5413	SULT1A4, SULT1A1, SLX1B-SULT1A4, SLX1A-SULT1A3, SULT1A3	445329, 105369243, 6817, 100526830, 100526831, 6818
217721_at	-0.934342	-0.326614	-8.04313	4.39693e-07	0.000143984	6.53584	SEPT7	989
210588_x_at	-0.854307	-0.221395	-8.04204	4.40485e-07	0.000144041	6.53401	HNRNPH3	3189
213047_x_at	-0.83996	-0.103284	-8.04202	4.405e-07	0.000144041	6.53397	SET	6418
238174_at	0.829182	0.216909	8.04011	4.41888e-07	0.000144361	6.53077
223322_at	1.06031	0.262694	8.0398	4.42115e-07	0.000144361	6.53025	RASSF5	83593
234978_at	0.85906	0.134766	8.03917	4.4257e-07	0.000144406	6.5292	SLC36A4	120103
212985_at	1.39501	0.250044	8.0386	4.42989e-07	0.000144439	6.52824	APBB2	323
229828_at	0.808979	0.168017	8.03674	4.44347e-07	0.000144736	6.52513	CDC73	79577
226685_at	0.949868	0.126757	8.03648	4.44536e-07	0.000144736	6.5247	SNTB2	6645
201060_x_at	1.03999	0.0433839	8.02378	4.53945e-07	0.000147512	6.5034	STOM	2040
223327_x_at	0.792119	0.133198	8.02363	4.54054e-07	0.000147512	6.50315
223474_at	1.93712	0.560581	8.02325	4.54339e-07	0.000147512	6.50251	IRF2BPL	64207
202126_at	0.874262	0.0295262	8.02323	4.54358e-07	0.000147512	6.50247	PRPF4B	8899
200715_x_at	0.916348	0.161279	8.02024	4.56604e-07	0.000148016	6.49746	SNORD35A, RPL13A	26816, 23521
221227_x_at	-1.24686	-0.337438	-8.02022	4.56619e-07	0.000148016	6.49742	COQ3	51805
224435_at	1.86303	0.259203	8.01986	4.56888e-07	0.000148016	6.49682	FAM213A	84293
236270_at	0.943485	0.181338	8.01927	4.57337e-07	0.000148056	6.49582	NFATC4	4776
211094_s_at	1.38347	0.196874	8.01465	4.60837e-07	0.000149009	6.48807	NF1	4763
224064_s_at	-1.03178	-0.17899	-8.01452	4.60935e-07	0.000149009	6.48785	DHDDS	79947
230259_at	-1.33005	-0.359817	-8.01019	4.64238e-07	0.00014997	6.48059	FUOM	282969
214838_at	-1.09316	-0.113877	-8.00733	4.66437e-07	0.000150467	6.47578	SFT2D2	375035
241418_at	2.09413	1.27607	8.00233	4.70302e-07	0.000151606	6.46739
212217_at	-1.48871	-0.411696	-8.00097	4.71361e-07	0.00015184	6.4651	PREPL	9581
222487_s_at	-1.08934	-0.265854	-8.00048	4.71747e-07	0.000151857	6.46427
208534_s_at	0.926417	0.152166	7.99854	4.73262e-07	0.000152236	6.46101	RASA4B, , RASA4DP, RASA4, RASA4CP	100271927, 10156, 102724229
205280_at	2.10052	0.451854	7.99652	4.74844e-07	0.000152637	6.45761	GLRB	2743
225514_at	-1.22052	-0.298219	-7.99566	4.75515e-07	0.000152745	6.45618	NOP9, LTB4R2	161424, 56413
223824_at	-0.991585	-0.103991	-7.99502	4.76022e-07	0.0001528	6.45509	RNLS	55328
219461_at	1.37571	0.36896	7.99343	4.77271e-07	0.000153093	6.45243	, PAK6	106821730, 56924
213293_s_at	-2.28695	-0.9426	-7.99247	4.78032e-07	0.000153229	6.45081	TRIM22	10346
221208_s_at	1.30797	0.289557	7.99024	4.79795e-07	0.000153686	6.44706	MSANTD2	79684
202694_at	0.940461	0.321539	7.98902	4.8077e-07	0.00015389	6.445	STK17A	9263
223018_at	0.72929	0.0428768	7.988	4.81575e-07	0.000154039	6.4433	, NOB1	28987
202234_s_at	0.839166	0.0439165	7.98388	4.8487e-07	0.000154938	6.43636	SLC16A1	6566
1554415_at	-1.41556	-0.363888	-7.98364	4.85067e-07	0.000154938	6.43595	TAF5L	27097
219565_at	-1.19035	-0.0862849	-7.9828	4.85742e-07	0.000155045	6.43453	CYP20A1	57404
226722_at	2.39055	0.385823	7.98143	4.86841e-07	0.000155287	6.43223	FAM20C	56975
226015_at	-1.0084	-0.174183	-7.9795	4.884e-07	0.000155675	6.42898	ZNF12	7559
223007_s_at	1.17321	0.234703	7.97748	4.90033e-07	0.000156086	6.42559	TMEM245	23731
230030_at	1.92019	0.159458	7.97619	4.91086e-07	0.000156312	6.4234	HS6ST2	90161
202907_s_at	-1.26795	-0.367379	-7.97574	4.91452e-07	0.000156319	6.42265	NBN	4683
222942_s_at	-0.792754	-0.0849097	-7.97488	4.92144e-07	0.000156425	6.42121	TIAM2	26230
221742_at	0.918848	0.206208	7.97439	4.92551e-07	0.000156425	6.42037	CELF1	10658
219374_s_at	-0.647722	-0.18789	-7.97377	4.9305e-07	0.000156425	6.41934	, ALG9	79796
217966_s_at	1.79852	0.636606	7.97303	4.93654e-07	0.000156425	6.4181	FAM129A	116496
228607_at	-1.13754	-0.709312	-7.97302	4.93664e-07	0.000156425	6.41808	OAS2	4939
203804_s_at	0.795632	0.0522163	7.9728	4.93849e-07	0.000156425	6.4177	LUC7L3	51747
212480_at	-0.753461	-0.116031	-7.97066	4.95599e-07	0.00015687	6.4141	SPECC1L	23384
209535_s_at	1.41319	0.311323	7.96931	4.96709e-07	0.000157051	6.41182
208699_x_at	1.78672	0.436692	7.96912	4.96862e-07	0.000157051	6.41151	TKT	7086
202022_at	-1.31269	-0.342462	-7.96861	4.97285e-07	0.000157076	6.41064	ALDOC	230
202109_at	1.43303	0.352326	7.96624	4.99239e-07	0.00015743	6.40665	ARFIP2	23647
204825_at	1.46728	-0.00966071	7.96614	4.99323e-07	0.00015743	6.40648	MELK	9833
205677_s_at	1.76239	-0.0140179	7.96599	4.99445e-07	0.00015743	6.40623	, DLEU1
208093_s_at	0.781632	0.291817	7.96328	5.01697e-07	0.00015803	6.40166	NDEL1	81565
238642_at	0.915675	0.264389	7.96075	5.03807e-07	0.000158585	6.39739	ANKRD13D	338692
238077_at	1.09694	0.245872	7.95935	5.0497e-07	0.000158842	6.39504	KCTD6	200845
241374_at	1.18498	0.328931	7.9585	5.05682e-07	0.000158939	6.39361	TMEM39A	55254
242414_at	2.11261	0.294733	7.95815	5.05978e-07	0.000158939	6.39301	QPRT	23475
201019_s_at	-0.851946	-0.205155	-7.95533	5.08354e-07	0.000159575	6.38825	EIF1AXP1, EIF1AX	1964
219525_at	1.20861	0.37588	7.95293	5.10379e-07	0.0001601	6.3842	SLC47A1	55244
222702_x_at	-0.878146	-0.130193	-7.95113	5.11899e-07	0.000160466	6.38118	CRIPT	9419
226179_at	1.39897	0.170313	7.94756	5.14943e-07	0.000161309	6.37515	SLC25A37	51312
209569_x_at	-1.14029	-0.286602	-7.94709	5.15349e-07	0.000161325	6.37435		27065
218334_at	-0.886362	-0.29157	-7.94649	5.15863e-07	0.000161375	6.37333	THOC7	80145
217742_s_at	0.898727	0.276034	7.94555	5.16667e-07	0.000161515	6.37175	WAC	51322
219571_s_at	-1.0676	-0.173594	-7.94316	5.18713e-07	0.000161965	6.36773	ZNF12	7559
221565_s_at	1.27218	0.308043	7.94304	5.18817e-07	0.000161965	6.36752	CALHM2	51063
212146_at	1.42157	0.343396	7.94026	5.21224e-07	0.000162605	6.36281	PLEKHM2	23207
40446_at	1.15634	0.449783	7.93666	5.24348e-07	0.000163467	6.35673	PHF1	5252
200703_at	-1.09891	-0.256867	-7.93545	5.25399e-07	0.000163683	6.3547	DYNLL1	8655
219104_at	-1.49994	-0.462081	-7.93473	5.26024e-07	0.000163765	6.35349	RNF141	50862
219578_s_at	-1.06409	-0.189361	-7.9339	5.26754e-07	0.000163881	6.35208	CPEB1	64506
220407_s_at	-2.53917	-0.552713	-7.93252	5.27965e-07	0.000164145	6.34974	TGFB2	7042
226710_at	1.15165	0.481478	7.92933	5.30769e-07	0.000164904	6.34435	C8orf82	414919
209530_at	1.03441	0.185188	7.92699	5.32835e-07	0.000165433	6.3404	CACNB3	784
229572_at	1.48755	0.396988	7.92622	5.33515e-07	0.000165459	6.3391	ATP6V0A2	23545
1555480_a_at	1.90885	0.516207	7.92608	5.33645e-07	0.000165459	6.33886	FBLIM1	54751
222616_s_at	-0.81028	-0.0657265	-7.92391	5.35572e-07	0.00016586	6.33519	USP16	10600
210118_s_at	0.831921	0.409566	7.9238	5.35668e-07	0.00016586	6.33501	IL1A	3552
200720_s_at	-0.800736	-0.252009	-7.91769	5.4114e-07	0.000167317	6.32467	ACTR1A	10121
222273_at	1.398	0.188976	7.91731	5.41479e-07	0.000167317	6.32403	PAPOLG	64895
215125_s_at	2.9007	0.840182	7.91483	5.43721e-07	0.000167668	6.31983	UGT1A9, UGT1A4, UGT1A10, UGT1A3, UGT1A6, UGT1A8, UGT1A7, UGT1A1, UGT1A5	54600, 54657, 54575, 54659, 54578, 54576, 54577, 54658, 54579
218037_at	1.09548	0.359614	7.91123	5.4698e-07	0.000168459	6.31375	FAM134A	79137
215286_s_at	1.61978	0.106416	7.91118	5.47027e-07	0.000168459	6.31366	PHTF2	57157
225104_at	1.40257	0.304024	7.90612	5.51657e-07	0.00016977	6.30508	ZNF598	90850
215411_s_at	0.834385	0.113643	7.90503	5.52659e-07	0.000169907	6.30324	TRAF3IP2	10758
225406_at	0.632707	-0.0614658	7.90465	5.53009e-07	0.000169907	6.30259	TWSG1	57045
200882_s_at	-0.7644	-0.186366	-7.90441	5.53222e-07	0.000169907	6.3022	PSMD4, PIPSL	5710
220746_s_at	1.03796	0.198548	7.90326	5.54289e-07	0.00017012	6.30024	UIMC1	51720
209724_s_at	1.03537	0.097398	7.8987	5.58512e-07	0.0001713	6.29252	ZBTB14	7541
205227_at	-1.06136	-0.508304	-7.89098	5.65738e-07	0.0001734	6.27944	IL1RAP	3556
214343_s_at	-1.24781	-0.196256	-7.88771	5.68834e-07	0.000174231	6.27389	ATXN7L1	222255
223155_at	-1.13333	-0.285817	-7.88519	5.71225e-07	0.000174846	6.26962	HDHD2	84064
200650_s_at	-0.726119	-0.208301	-7.88326	5.73064e-07	0.000175291	6.26635	LDHA,	3939
1554794_a_at	-1.04751	-0.259809	-7.88194	5.74325e-07	0.000175558	6.26411	UBE3C	9690
212823_s_at	1.31702	0.16035	7.88095	5.75278e-07	0.000175732	6.26243	PLEKHG3	26030
47553_at	0.835355	0.225853	7.87961	5.76565e-07	0.000176006	6.26015	WHRN	25861
244386_at	1.24139	0.372186	7.87852	5.77614e-07	0.000176208	6.2583
230697_at	-0.863951	-0.221199	-7.87777	5.78338e-07	0.000176311	6.25703	BBS5,	129880
230494_at	2.35388	0.914821	7.87565	5.80389e-07	0.000176718	6.25343	SLC20A1	6574
204040_at	0.774861	-0.000631538	7.87559	5.80448e-07	0.000176718	6.25332	RNF144A	9781
206495_s_at	0.904128	0.283253	7.87426	5.81736e-07	0.00017693	6.25107	HINFP	25988
201195_s_at	2.00592	0.757575	7.87406	5.81924e-07	0.00017693	6.25074	SLC7A5	8140
225148_at	0.768926	0.171191	7.87293	5.83024e-07	0.000177015	6.24882	RPS19BP1	91582
238597_at	1.22801	0.356907	7.8726	5.83349e-07	0.000177015	6.24825
205005_s_at	-0.87695	-0.327266	-7.87249	5.8345e-07	0.000177015	6.24808	NMT2	9397
211711_s_at	1.04988	0.250046	7.87217	5.83761e-07	0.000177015	6.24753	, PTENP1, PTEN	11191, 5728
219764_at	2.72155	0.855083	7.87113	5.8478e-07	0.000177206	6.24576	FZD10	11211
203285_s_at	1.09888	0.0567853	7.87066	5.85242e-07	0.000177228	6.24496	HS2ST1	9653
1555841_at	1.04471	0.456311	7.86969	5.86187e-07	0.000177396	6.24331	MSANTD3	91283
1555829_at	-1.49753	-0.460894	-7.86835	5.87495e-07	0.000177643	6.24105	ESYT2	57488
217829_s_at	0.636082	0.0128632	7.86806	5.87784e-07	0.000177643	6.24055	USP39	10713
206116_s_at	-1.97996	-0.742086	-7.86628	5.89535e-07	0.000178054	6.23752	TPM1	7168
204072_s_at	-2.30158	-0.246902	-7.86127	5.9449e-07	0.000179329	6.229	FRY	10129
209339_at	1.16367	0.0691195	7.86121	5.94544e-07	0.000179329	6.22891	SIAH2	6478
205961_s_at	2.02125	-0.0267331	7.85887	5.96876e-07	0.000179913	6.22493	PSIP1	11168
228017_s_at	1.13546	0.342632	7.85823	5.97512e-07	0.000179985	6.22384	NKAIN4	128414
213279_at	-1.07254	-0.148845	-7.85767	5.98073e-07	0.000180035	6.22289	DHRS1	115817
205105_at	-0.658781	-0.0967351	-7.85703	5.98711e-07	0.000180108	6.22181	MAN2A1	4124
202729_s_at	1.68393	0.0403811	7.85392	6.01832e-07	0.000180927	6.21651	LTBP1	4052
213117_at	-1.30235	-0.329003	-7.85009	6.05696e-07	0.000181968	6.21	KLHL9	55958
211985_s_at	-1.04228	-0.0856814	-7.84783	6.07986e-07	0.000182535	6.20616	CALM1	801, 805
235337_at	-1.217	-0.655579	-7.84527	6.106e-07	0.000183079	6.2018	SERTAD4	56256
209909_s_at	-4.1734	-0.962616	-7.84412	6.11769e-07	0.000183308	6.19985	TGFB2	7042
208668_x_at	-1.11727	-0.371122	-7.84148	6.14482e-07	0.000184	6.19535	HMGN2P41, RPL12P38, HMGN2P17, HMGN2P3, HMGN2P5, HMGN2, HMGN2P6	3151
225446_at	-1.25969	-0.294524	-7.84019	6.15806e-07	0.000184275	6.19316	BRWD1	54014
204658_at	-1.67641	-0.382681	-7.8389	6.17138e-07	0.0001845	6.19096	TRA2A	29896
204600_at	1.43503	0.314533	7.83868	6.17369e-07	0.0001845	6.19058	EPHB3	2049
203848_at	1.02797	0.275061	7.83651	6.19607e-07	0.000184721	6.1869	AKAP8	10270
1570588_at	0.928763	0.151104	7.836	6.20138e-07	0.000184721	6.18603
240824_at	1.42764	0.430053	7.82461	6.32077e-07	0.000187908	6.16662
204880_at	-1.00925	-0.344055	-7.82301	6.33771e-07	0.000188254	6.1639	MGMT	4255
212923_s_at	1.00061	0.292262	7.82273	6.3407e-07	0.000188254	6.16342	PXDC1	221749
201567_s_at	0.812435	0.225332	7.82177	6.35092e-07	0.000188435	6.16178	GOLGA4	2803
225950_at	1.08174	0.328558	7.81842	6.38663e-07	0.000189371	6.15608	SAMD8	142891
217940_s_at	-1.12136	-0.163133	-7.81774	6.39392e-07	0.000189463	6.15492	NAXD	55739
212066_s_at	0.710376	0.220668	7.81661	6.40611e-07	0.000189701	6.15298	USP34	9736
239258_at	0.929024	0.305838	7.81424	6.43156e-07	0.000190207	6.14894
224918_x_at	1.00767	0.405545	7.8138	6.43635e-07	0.000190225	6.14818	MGST1	4257
227742_at	1.3946	0.288312	7.81335	6.44115e-07	0.000190243	6.14743	CLIC6	54102
202949_s_at	1.15538	0.35274	7.81295	6.44555e-07	0.00019025	6.14673	FHL2	2274
217834_s_at	-0.768983	-0.219919	-7.80724	6.50755e-07	0.000191478	6.13699	SYNCRIP	10492
212570_at	-1.58656	-0.4293	-7.80717	6.50822e-07	0.000191478	6.13688	ENDOD1	23052
1570270_at	-0.66642	-0.120804	-7.8062	6.51889e-07	0.000191584	6.13522		101926942
225299_at	-1.76287	-0.315255	-7.80607	6.52024e-07	0.000191584	6.13501	MYO5B	4645
241734_at	-0.950729	-0.26412	-7.80508	6.53112e-07	0.00019178	6.13331	SRFBP1	153443
212647_at	-0.78454	-0.174001	-7.80154	6.57007e-07	0.000192675	6.12726	RRAS	6237
226626_at	0.881499	0.116077	7.7966	6.62475e-07	0.000193974	6.11883	THOC2	57187
208836_at	0.804276	0.0743481	7.79469	6.64595e-07	0.000194399	6.11558	ATP1B3, ATP1B3P1	483
211984_at	-0.998873	-0.0563843	-7.79195	6.67662e-07	0.00019517	6.11089	CALM1	801, 805
224580_at	1.09651	0.342103	7.78938	6.70556e-07	0.00019589	6.10649	SLC38A1	81539
227551_at	0.933256	0.246187	7.785	6.75507e-07	0.000197084	6.099	ABHD17B	51104
224631_at	0.894682	0.247782	7.78322	6.77522e-07	0.000197545	6.09597	ZFP91, ZFP91-CNTF	80829
201337_s_at	-1.03894	-0.351001	-7.77903	6.82317e-07	0.000198815	6.08879	VAMP3	9341
216064_s_at	-1.26109	-0.393828	-7.77779	6.83736e-07	0.000199101	6.08668	AGA	175
231097_at	-0.83972	-0.193886	-7.77621	6.8556e-07	0.000199505	6.08397
1552303_a_at	-0.913855	-0.150536	-7.76866	6.94316e-07	0.000201704	6.07105	TMEM106A	113277
202821_s_at	1.52165	0.272778	7.76855	6.94447e-07	0.000201704	6.07086	LPP	4026
228565_at	1.14087	0.111606	7.76739	6.95802e-07	0.000201839	6.06888		84451
226748_at	1.07033	-0.00941106	7.76682	6.96475e-07	0.000201896	6.06789	LYSMD2	256586
227006_at	1.70779	0.15227	7.76646	6.96886e-07	0.000201896	6.06729	PPP1R14A	94274
217964_at	-1.20224	-0.356196	-7.76287	7.01111e-07	0.000202759	6.06114	TTC19	54902
205623_at	1.77127	0.905299	7.76281	7.01186e-07	0.000202759	6.06103	ALDH3A1	218
209652_s_at	2.0663	0.537407	7.7628	7.01199e-07	0.000202759	6.06102	PGF	5228
205583_s_at	-0.970655	-0.0591093	-7.76068	7.03703e-07	0.000203224	6.05739	ALG13	79868
210110_x_at	-0.855724	-0.202572	-7.76007	7.04427e-07	0.000203277	6.05634	HNRNPH3	3189
1554780_a_at	0.773147	0.00182128	7.75977	7.04779e-07	0.000203277	6.05583	PHTF2	57157
209031_at	1.36342	0.463343	7.75787	7.07036e-07	0.000203563	6.05258	CADM1	23705
206034_at	-1.70257	0.0147208	-7.75616	7.0908e-07	0.000203873	6.04964	SERPINB8	5271
227062_at	2.22518	0.627895	7.75558	7.09768e-07	0.000203873	6.04865	NEAT1	283131, 693197
232593_at	1.22614	0.444341	7.75557	7.09784e-07	0.000203873	6.04863	NEURL3	93082
215990_s_at	0.959887	0.282275	7.7554	7.09983e-07	0.000203873	6.04835	BCL6	604
200813_s_at	-1.05563	-0.275168	-7.7538	7.11898e-07	0.000204178	6.0456	PAFAH1B1	5048
218111_s_at	-0.89684	-0.0580864	-7.75376	7.11944e-07	0.000204178	6.04554	CMAS	55907
219767_s_at	-1.05741	-0.273582	-7.74958	7.1698e-07	0.000205365	6.03836	CRYZL1	9946
212177_at	0.929422	0.0989584	7.74958	7.16986e-07	0.000205365	6.03836	PNISR	25957
219809_at	0.99691	0.252292	7.74385	7.23939e-07	0.000207226	6.02854	WDR55	54853
241709_s_at	-0.792444	0.00329738	-7.74029	7.28297e-07	0.00020788	6.02243	DOCK1	1793
219848_s_at	-1.35319	-0.00795297	-7.73982	7.28872e-07	0.00020788	6.02162	ZNF432	9668
219182_at	-1.0974	-0.239474	-7.73974	7.28965e-07	0.00020788	6.02149	TMEM231	79583
205487_s_at	-1.72981	-0.433958	-7.73792	7.31209e-07	0.000208389	6.01837	VGLL1	51442
225843_at	0.986395	0.178941	7.73224	7.38245e-07	0.000210192	6.00862	ZFYVE19	84936
222844_s_at	-1.15739	-0.361901	-7.73176	7.38843e-07	0.000210192	6.0078	SRR	63826
200039_s_at	-0.736111	-0.13882	-7.7317	7.38921e-07	0.000210192	6.00769	PSMB2	5690
201758_at	-0.736102	-0.0717972	-7.72507	7.47234e-07	0.000212291	5.9963	TSG101	7251
201226_at	-0.729902	-0.206014	-7.72346	7.49265e-07	0.000212602	5.99354	NDUFB8,	4714
209531_at	-1.28475	-0.374863	-7.72225	7.50803e-07	0.000212906	5.99145	GSTZ1	2954
1556588_at	-1.67803	-0.125983	-7.72068	7.52787e-07	0.000213336	5.98877	ST20-AS1
219926_at	1.13056	0.638504	7.72025	7.53333e-07	0.000213358	5.98803	POPDC3	64208
226308_at	1.12992	-0.0772062	7.71664	7.57944e-07	0.00021453	5.98182	HAUS8	93323
217202_s_at	-0.961074	-0.450188	-7.71436	7.60873e-07	0.000215225	5.97789	, GLULP4, SBF2, GLUL	81846, 2752
212097_at	-1.41492	-0.554465	-7.7128	7.62881e-07	0.000215659	5.97521	CAV1	857
1554594_at	-1.4035	-0.00549127	-7.71174	7.64244e-07	0.000215776	5.97339	ARHGAP27	201176
221710_x_at	0.955323	0.230041	7.71006	7.66423e-07	0.000216257	5.9705	EVA1B	55194
1553313_s_at	1.62118	0.443794	7.70759	7.6962e-07	0.000217024	5.96626	SLC5A3	6526
218871_x_at	1.11376	0.481176	7.70676	7.70704e-07	0.00021711	5.96483	CSGALNACT2	55454
215501_s_at	1.44585	0.3092	7.70643	7.71137e-07	0.00021711	5.96426	DUSP10	11221
204849_at	0.903154	0.0469994	7.70548	7.72371e-07	0.000217261	5.96263	TCFL5	10732
221690_s_at	-1.39389	-0.443539	-7.70333	7.75185e-07	0.000217918	5.95893	NLRP2	55655
220757_s_at	0.712481	0.18526	7.6929	7.88984e-07	0.000221524	5.94097	UBXN6	80700
212184_s_at	0.85273	0.18047	7.68742	7.9634e-07	0.000223432	5.93152	TAB2	23118
204847_at	0.880311	0.198365	7.6871	7.96765e-07	0.000223432	5.93098	ZBTB11	27107
223469_at	1.36066	0.377508	7.68386	8.01147e-07	0.000224384	5.9254	PGPEP1	54858
219631_at	0.731963	0.185576	7.68209	8.03552e-07	0.000224781	5.92235	LRP12	29967
203091_at	-0.755355	-0.250349	-7.67907	8.07675e-07	0.000225657	5.91714	FUBP1	8880
225030_at	0.82649	0.104738	7.67866	8.08229e-07	0.000225673	5.91644	BOD1	91272
209520_s_at	-0.830167	-0.288611	-7.67683	8.10746e-07	0.000226237	5.91328	NCBP1	4686
217814_at	0.883316	0.0754462	7.67543	8.12664e-07	0.000226621	5.91087	CCDC47	57003
1556715_at	0.914889	0.198101	7.6751	8.13118e-07	0.000226621	5.9103	PRPSAP1	5635
232150_at	1.38984	0.456258	7.67359	8.15205e-07	0.000226924	5.90769
206561_s_at	3.95495	1.30431	7.67222	8.17107e-07	0.000227315	5.90532	AKR1B10	57016
201860_s_at	2.46621	0.514265	7.67132	8.18347e-07	0.000227521	5.90378	PLAT	5327
237052_x_at	0.861465	0.0211546	7.67004	8.20126e-07	0.000227876	5.90157	GIGYF2	26058
220685_at	1.03774	0.106752	7.6696	8.20744e-07	0.000227909	5.9008	FAM120C	54954
228476_at	-0.965573	-0.173088	-7.66891	8.21703e-07	0.000228036	5.89961	CCDC191	57577
222623_s_at	1.03971	0.0498844	7.66832	8.22528e-07	0.000228125	5.89859	ZNF639	51193
214639_s_at	1.05709	0.0237896	7.66789	8.23127e-07	0.000228152	5.89785	HOXA1	3198
223177_at	-0.706604	-0.22588	-7.66483	8.27399e-07	0.000229057	5.89258	NT5DC1	221294
228665_at	1.45619	-0.264955	7.66428	8.28176e-07	0.000229133	5.89163	CYYR1	116159
205153_s_at	-1.21448	-0.223306	-7.66189	8.31533e-07	0.000229922	5.88751	CD40	958
238615_at	-1.71127	-0.283132	-7.66024	8.33865e-07	0.000230427	5.88466	ERLIN2	11160
225386_s_at	-0.795614	-0.124375	-7.65813	8.36864e-07	0.000230841	5.881	HNRNPLL	92906
214583_at	-1.45661	-0.215804	-7.65811	8.36888e-07	0.000230841	5.88097	RSC1A1, DDI2	6248, 84301
222494_at	1.54218	0.0855069	7.65556	8.40517e-07	0.000231561	5.87657	FOXN3	1112
211987_at	-0.627603	-0.188603	-7.65463	8.41847e-07	0.000231647	5.87496	TOP2B	7155, 100616477
230364_at	0.988701	0.0146572	7.65295	8.44249e-07	0.000232168	5.87206	CHPT1	56994
213646_x_at	-0.921511	-0.26758	-7.6445	8.56445e-07	0.000234699	5.85746	TUBA1B, TUBA1A	10376, 7846
212573_at	-1.38651	-0.476983	-7.64408	8.57066e-07	0.000234699	5.85672	ENDOD1	23052
225192_at	0.61246	0.179023	7.64301	8.58615e-07	0.000234982	5.85489	CACUL1	143384
219015_s_at	-0.989227	-0.0142803	-7.64235	8.59582e-07	0.000235105	5.85374	ALG13	79868
212501_at	1.35424	0.514673	7.64021	8.6271e-07	0.000235677	5.85004	CEBPB	1051
207022_s_at	-0.833115	-0.153453	-7.63326	8.72957e-07	0.000237814	5.83802	LDHC	3948
219538_at	-1.49896	-0.324684	-7.63187	8.75026e-07	0.000237985	5.83561	WDR5B	54554
219163_at	-0.582095	0.0928009	-7.63166	8.75344e-07	0.000237985	5.83524	ZNF562	54811
226538_at	-0.713852	-0.112068	-7.62759	8.81421e-07	0.000239351	5.8282	MAN2A1	4124
201136_at	-0.869779	-0.257325	-7.62636	8.83271e-07	0.000239612	5.82607	PLP2	5355
220253_s_at	0.928019	0.155396	7.62625	8.83437e-07	0.000239612	5.82588	LRP12	29967
239668_at	1.18153	0.319099	7.62307	8.88215e-07	0.000240765	5.82039	KRR1,	11103
201387_s_at	0.972011	0.521247	7.62046	8.92168e-07	0.000241496	5.81586	UCHL1	7345
1556064_at	-1.95817	-0.205885	-7.62024	8.92507e-07	0.000241496	5.81548	PPARA	5465
223165_s_at	1.14778	0.292097	7.61883	8.94655e-07	0.000241934	5.81303	IP6K2	51447
214974_x_at	-3.2647	-0.150043	-7.61562	8.99554e-07	0.000242681	5.80747	CXCL5	6374
217492_s_at	0.946995	0.248142	7.61486	9.00719e-07	0.000242837	5.80616	PTENP1, PTEN	11191, 5728
232172_at	1.10144	0.424796	7.61455	9.012e-07	0.000242837	5.80561	CD99P1	401577
236384_at	0.888568	0.224846	7.61139	9.06056e-07	0.000243811	5.80014	NCBP3	55421
210910_s_at	1.33919	0.283175	7.61096	9.06716e-07	0.000243811	5.7994	ZP3, POMZP3	7784, 22932
203543_s_at	1.35796	0.395529	7.61081	9.06958e-07	0.000243811	5.79913	KLF9	687
223418_x_at	0.957771	0.279335	7.60997	9.08249e-07	0.000243972	5.79768	ANKRD13C	81573
226924_at	-1.13668	-0.067941	-7.60972	9.08629e-07	0.000243972	5.79725	LINC00909	400657
229397_s_at	1.04672	0.0846773	7.60862	9.10334e-07	0.000244285	5.79535
222770_s_at	-1.19241	-0.238838	-7.60434	9.17002e-07	0.000245785	5.78792	GUF1	60558
203759_at	0.883911	0.278993	7.59979	9.24136e-07	0.000247137	5.78003	ST3GAL4	6484
223488_s_at	-1.15526	-0.416634	-7.59974	9.2422e-07	0.000247137	5.77994	GNB4	59345
230362_at	-0.820009	-0.23084	-7.59661	9.29156e-07	0.000247729	5.77451	INPP5F	22876
203875_at	1.05776	0.0448283	7.59396	9.33365e-07	0.000248611	5.76991	SMARCA1	6594
225238_at	0.985977	-0.00375451	7.59381	9.33605e-07	0.000248611	5.76965	MSI2	124540
1558290_a_at	1.64659	0.438837	7.5935	9.34106e-07	0.000248611	5.76911	PVT1	100302185
228497_at	1.25967	0.397935	7.59253	9.35639e-07	0.000248874	5.76744	SLC22A15	55356
221514_at	-1.01083	-0.255835	-7.59014	9.3947e-07	0.000249601	5.76328	UTP14A	10813
216674_at	-1.30754	-0.563085	-7.58863	9.41884e-07	0.000250096	5.76066	HES2	54626
209711_at	-1.24129	-0.33832	-7.58602	9.46095e-07	0.000251068	5.75612	SLC35D1	23169
229590_at	0.847564	0.174476	7.58299	9.51004e-07	0.000252076	5.75085	RPL13	6137
222544_s_at	0.719582	0.124806	7.57915	9.57248e-07	0.000253583	5.74419	WHSC1L1	54904
1555950_a_at	1.12975	0.547884	7.57583	9.62697e-07	0.000254878	5.73841	CD55	1604
228320_x_at	1.08931	0.356926	7.57097	9.70724e-07	0.000256705	5.72996	BICDL1	92558
215930_s_at	0.999362	0.374833	7.5695	9.73158e-07	0.00025705	5.72741	, CTAGE5	4253
230254_at	-1.45576	-0.499846	-7.56788	9.75861e-07	0.000257349	5.72459	FAM26E	254228
212180_at	0.941569	0.294754	7.56766	9.76214e-07	0.000257349	5.72422	CRKL	1399
206554_x_at	-1.77591	-0.689915	-7.56724	9.76925e-07	0.000257349	5.72348	SETMAR	6419
AFFX-HUMISGF3A/M97935_MB_at	-1.06422	-0.862108	-7.56644	9.78253e-07	0.000257349	5.7221	STAT1	6772
213353_at	-0.915319	-0.013631	-7.56492	9.80796e-07	0.000257869	5.71945	ABCA5	23461
227942_s_at	-0.787276	-0.142528	-7.56435	9.81756e-07	0.000257972	5.71846	CRIPT	9419
222713_s_at	-0.746849	-0.222722	-7.56308	9.83888e-07	0.000258383	5.71625	FANCF	2188
218922_s_at	0.67444	0.124579	7.56031	9.88562e-07	0.000259461	5.71142	CERS4	79603
239682_at	-0.992917	-0.0748017	-7.55995	9.89166e-07	0.00025947	5.7108
205505_at	-0.856505	-0.282282	-7.55276	1.0014e-06	0.000261773	5.69829	GCNT1	2650
236027_at	-1.18615	-0.0706414	-7.55049	1.00531e-06	0.000262583	5.69432	SFR1	119392
221480_at	-1.82148	-0.571115	-7.5483	1.00907e-06	0.000263324	5.69052	HNRNPD	3184
222624_s_at	1.14805	0.0943565	7.54188	1.02022e-06	0.000265929	5.67933	ZNF639	51193
235635_at	1.38217	0.218393	7.53999	1.02352e-06	0.000266484	5.67604	ARHGAP5	394
201926_s_at	1.17641	0.512056	7.53946	1.02445e-06	0.000266574	5.67512	CD55	1604
226381_at	0.904235	0.362861	7.53675	1.02923e-06	0.000267662	5.67039
219164_s_at	0.962724	0.176375	7.53481	1.03265e-06	0.000268169	5.66701	ATG2B	55102
234106_s_at	1.16755	0.306261	7.53431	1.03353e-06	0.000268169	5.66614	FLYWCH1	84256
1552766_at	1.05144	0.116049	7.52812	1.04455e-06	0.000270719	5.65534	HS6ST2	90161
219540_at	1.01877	0.272289	7.52662	1.04725e-06	0.00027111	5.65271	ZNF267	10308
219885_at	-1.4961	-0.642444	-7.52623	1.04795e-06	0.000271136	5.65203	SLFN12	55106
219638_at	-1.36289	-0.536846	-7.52402	1.05192e-06	0.000271854	5.64818	FBXO22	26263
203065_s_at	-1.54876	-0.649833	-7.52145	1.05657e-06	0.000272901	5.64369	CAV1	857
229182_at	-1.0073	-0.0461481	-7.51486	1.06857e-06	0.000275531	5.6322	TMEM199	147007, 100616388
201280_s_at	1.85517	0.717724	7.50417	1.08837e-06	0.000279843	5.6135	DAB2	1601
221219_s_at	-0.805392	-0.179146	-7.5027	1.09111e-06	0.000280389	5.61094	KLHDC4	54758, 105371397
219038_at	-0.833571	-0.221734	-7.50138	1.09359e-06	0.000280569	5.60863	MORC4	79710
204802_at	1.57786	0.829757	7.49685	1.10213e-06	0.000282423	5.60071	RRAD	6236
202463_s_at	0.707688	0.0242628	7.48874	1.11761e-06	0.000285425	5.58651	MBD3	53615
235372_at	0.903826	0.00656695	7.48524	1.12435e-06	0.000286986	5.58039	FCRLA	84824
202950_at	-0.799171	-0.236474	-7.48467	1.12545e-06	0.000287104	5.5794	CRYZ	1429
204731_at	1.16013	0.173447	7.48136	1.13187e-06	0.000288259	5.5736	TGFBR3	7049
227541_at	-1.11164	-0.0745032	-7.48093	1.13271e-06	0.000288278	5.57284	WDR20	91833
204773_at	0.86836	0.0700374	7.48061	1.13333e-06	0.000288278	5.57229	IL11RA	3590
221006_s_at	1.05169	0.286842	7.47764	1.13913e-06	0.000289459	5.56709	SNX27	81609
205773_at	1.66862	0.442847	7.47626	1.14185e-06	0.000289988	5.56466	CPEB3	22849
231890_at	0.86793	0.206838	7.4752	1.14392e-06	0.000290352	5.56282	SEC22B	9554
223692_at	-1.09848	-0.348006	-7.47425	1.14581e-06	0.000290669	5.56114	NMNAT1	64802
241421_at	0.828568	0.150177	7.46953	1.15514e-06	0.000292423	5.55288
225594_at	1.05073	0.276065	7.46946	1.1553e-06	0.000292423	5.55275	CREBZF	58487
226349_at	-0.728757	-0.327534	-7.4685	1.1572e-06	0.000292741	5.55107	C12orf45	121053
217925_s_at	0.782768	0.229881	7.4635	1.16721e-06	0.00029473	5.5423	C6orf106	64771
204459_at	-0.806302	-0.204675	-7.46328	1.16765e-06	0.00029473	5.54192	CSTF2	1478
220678_at	-0.668734	-0.158278	-7.45875	1.17678e-06	0.000296852	5.53398
214240_at	-1.77877	-0.176883	-7.4581	1.1781e-06	0.000296852	5.53284	GAL	51083
214649_s_at	-0.649589	-0.186392	-7.45626	1.18185e-06	0.000297323	5.52961	MTMR2	8898
213684_s_at	-0.882616	0.120394	-7.45534	1.18372e-06	0.000297596	5.528	PDLIM5	10611
202139_at	-0.894983	-0.327047	-7.45346	1.18756e-06	0.000298107	5.5247	AKR7A2	8574
1554411_at	-1.05833	-0.440551	-7.45308	1.18836e-06	0.000298107	5.52402	CTNNB1	1499
235736_at	1.06422	0.269903	7.45281	1.18889e-06	0.000298107	5.52356	SMKR1	100287482
226446_at	0.76469	0.328408	7.44323	1.2087e-06	0.000302239	5.50674	HES6	55502
225745_at	0.708591	0.113802	7.43936	1.21681e-06	0.000303933	5.49993	LRP6	4040
237367_x_at	-0.684659	-0.0877587	-7.43634	1.22316e-06	0.000305025	5.49463	CFLAR	8837
1555606_a_at	1.20914	0.186957	7.43633	1.22319e-06	0.000305025	5.4946	GDPD1	284161
218214_at	0.811742	0.288793	7.43227	1.23178e-06	0.00030683	5.48748	ATG101	60673
227796_at	-1.02045	-0.263658	-7.42712	1.24279e-06	0.00030911	5.47842	ZFP62	643836
243069_at	-0.821921	-0.129684	-7.42704	1.24297e-06	0.00030911	5.47827
204038_s_at	0.676906	0.0384529	7.42508	1.24717e-06	0.000309985	5.47484	LPAR1	1902
203874_s_at	0.988746	-0.00659082	7.42341	1.25078e-06	0.000310713	5.47189	SMARCA1	6594
203853_s_at	0.818001	0.214084	7.42036	1.25738e-06	0.000311889	5.46654	GAB2	9846
238520_at	2.04914	-0.070784	7.42027	1.25757e-06	0.000311889	5.46638	TRERF1	55809
218073_s_at	1.39508	-0.0482515	7.41981	1.25859e-06	0.000311971	5.46556	NDC1	55706
225237_s_at	1.15289	-0.0944968	7.41727	1.26412e-06	0.000313	5.46109	MSI2	124540
233852_at	-1.21304	-0.435652	-7.41483	1.26947e-06	0.000313813	5.45679
204058_at	0.748108	0.384213	7.40445	1.29245e-06	0.000318629	5.43852	ME1	4199
203957_at	0.776716	0.113851	7.40304	1.29562e-06	0.000319065	5.43602	, E2F6, E2F6P1, E2F6P2, E2F6P3	1876
230482_at	-1.20374	-0.377852	-7.39861	1.30559e-06	0.000320825	5.42822	ST6GALNAC5	81849
204803_s_at	1.77435	0.922252	7.3968	1.30969e-06	0.000321485	5.42503	RRAD	6236
206118_at	1.20868	0.227391	7.39645	1.31049e-06	0.000321506	5.42441	STAT4	6775
230733_at	-1.11947	-0.0118118	-7.39348	1.31723e-06	0.000322812	5.41919
226625_at	1.03832	0.187561	7.38764	1.33063e-06	0.00032522	5.40888	TGFBR3	7049
234989_at	2.13419	0.761148	7.38627	1.33378e-06	0.000325816	5.40647	NEAT1	283131, 693197
226664_at	0.847509	0.306218	7.38437	1.33818e-06	0.000326363	5.40312	TBC1D20	128637
1552678_a_at	0.850373	0.0811908	7.37335	1.364e-06	0.000330854	5.38366	USP28	57646
227776_at	0.931857	0.35734	7.37279	1.36532e-06	0.000330854	5.38267	ACER3	55331
220193_at	-0.955224	0.0125995	-7.371	1.36956e-06	0.000331705	5.37952	SH3D21	79729
224741_x_at	0.980874	0.34702	7.36906	1.37419e-06	0.000332472	5.37608	GAS5	60674
229830_at	1.08087	0.0876614	7.36676	1.37968e-06	0.000333446	5.37202
208941_s_at	-0.742163	-0.242359	-7.36246	1.39001e-06	0.000335586	5.36442	SEPHS1	22929
219756_s_at	-1.76044	-0.589206	-7.35807	1.40064e-06	0.000337973	5.35667	POF1B	79983
213379_at	-0.955709	-0.313565	-7.35389	1.41084e-06	0.000340073	5.34928	COQ2	27235
1560208_at	-1.11994	0.08318	-7.34878	1.42343e-06	0.000342927	5.34023
237031_at	1.26967	0.422675	7.34197	1.44037e-06	0.000346457	5.32818
212160_at	1.17791	0.386897	7.33306	1.46287e-06	0.000351497	5.3124	, XPOT	11260
1555724_s_at	-2.9458	-1.11344	-7.32892	1.47346e-06	0.000353561	5.30505	TAGLN	6876
228042_at	-0.830365	0.0316448	-7.32879	1.47379e-06	0.000353561	5.30482	ADPRH	141
222754_at	-0.860786	-0.2879	-7.32516	1.48313e-06	0.000355614	5.29839	TRNT1	51095
212665_at	0.795719	0.493502	7.31982	1.49698e-06	0.000358369	5.28893	TIPARP	25976
242079_at	0.995938	0.367089	7.31832	1.50089e-06	0.000359114	5.28627	RGS12	6002
231851_at	1.42134	0.0999256	7.31801	1.5017e-06	0.000359119	5.28572	RAVER2	55225
231733_at	-2.14226	-0.615642	-7.30899	1.5255e-06	0.000364237	5.26971	CARD18	59082
204678_s_at	1.67042	0.675423	7.30512	1.5358e-06	0.000366312	5.26286	KCNK1	3775
213029_at	1.41075	0.0724984	7.30334	1.54058e-06	0.000366949	5.25969	NFIB	4781
220311_at	-1.18658	-0.308075	-7.30333	1.54062e-06	0.000366949	5.25966	N6AMT1	29104
211337_s_at	0.945687	-0.0297489	7.30206	1.54403e-06	0.00036747	5.25742	TUBGCP4	27229
1562529_s_at	1.26041	0.379887	7.29884	1.55272e-06	0.0003688	5.2517
222403_at	-1.29397	-0.359977	-7.29704	1.55762e-06	0.00036977	5.24849	MTCH2	23788
204638_at	1.22748	0.376944	7.29494	1.56334e-06	0.000370548	5.24476	ACP5	54
225612_s_at	0.743259	0.256209	7.29272	1.56939e-06	0.000371595	5.24083	B3GNT5	84002
222405_at	1.03062	0.0592544	7.28756	1.58359e-06	0.000374129	5.23165	HACD3	51495
51228_at	-0.8333	-0.134058	-7.28017	1.60416e-06	0.000378253	5.21851	RBM12B	389677
202282_at	-0.727329	-0.236162	-7.27983	1.60512e-06	0.000378283	5.2179	, HSD17B10	3028
226926_at	-0.679081	-0.223286	-7.27909	1.60719e-06	0.000378575	5.21659	DMKN	93099
228694_at	1.36593	0.225701	7.27573	1.61665e-06	0.000380607	5.21061	AQR	9716
212586_at	-0.937162	-0.246423	-7.27515	1.61829e-06	0.000380794	5.20958	CAST	831
235103_at	-0.87965	-0.218383	-7.27099	1.6301e-06	0.000383376	5.20217	MAN2A1	4124
219610_at	0.663474	0.0828226	7.27067	1.63101e-06	0.000383392	5.2016	ARHGEF28	64283
233907_s_at	-1.03796	-0.393587	-7.26222	1.65528e-06	0.000388183	5.18656	SERTAD4	56256
221952_x_at	-1.11747	-0.426404	-7.26018	1.6612e-06	0.00038908	5.18293	HMGN2P41, TRMT5, HMGN2P3,	57570
207057_at	1.26216	-0.0344396	7.25611	1.67307e-06	0.000391266	5.17568	SLC16A7	9194
208893_s_at	1.09409	0.418119	7.25485	1.67677e-06	0.000391809	5.17343	DUSP6	1848
204287_at	0.766901	0.195612	7.25054	1.68948e-06	0.000393475	5.16574	SYNGR1	9145
1554390_s_at	-1.07528	-0.195244	-7.24834	1.69598e-06	0.000394384	5.16183	ACTR2	10097
230492_s_at	-0.942382	-0.112805	-7.24311	1.7116e-06	0.000397812	5.15249	, GPCPD1	56261
213762_x_at	-1.21929	-0.43173	-7.24177	1.71562e-06	0.00039818	5.1501	RBMX, , RBMXP2	27316
235054_at	-0.994761	-0.346512	-7.24171	1.71581e-06	0.00039818	5.14999	NUDT16	131870
228899_at	-1.28807	-0.17124	-7.24076	1.71866e-06	0.000398639	5.1483
239170_at	-0.786492	-0.168241	-7.23466	1.73715e-06	0.000402106	5.1374	ACTR3	10096
219443_at	-0.937099	-0.235521	-7.23233	1.74424e-06	0.000403543	5.13325	TASP1	55617
229202_at	1.09483	0.467437	7.23193	1.74547e-06	0.000403622	5.13254	PCNX2	80003
222931_s_at	-2.11429	-0.540873	-7.23043	1.75005e-06	0.000404468	5.12986	THNSL1	79896
215646_s_at	1.99281	-0.204348	7.22491	1.76708e-06	0.000406757	5.12001	VCAN	1462
203658_at	1.06482	0.216201	7.21777	1.78938e-06	0.000411267	5.10723	SLC25A20	788
232413_at	-0.809108	-0.211597	-7.21607	1.7947e-06	0.000412282	5.10421
204237_at	1.47591	0.734821	7.21299	1.80444e-06	0.000413891	5.0987	GULP1	51454
223625_at	-0.823914	-0.259822	-7.21236	1.80644e-06	0.000414142	5.09757	FAM126A	84668
1553974_at	-1.21507	-0.358243	-7.20841	1.81901e-06	0.000416603	5.09051	C22orf39	128977
1559822_s_at	0.665936	0.289513	7.20599	1.82678e-06	0.000417541	5.08617	MTDH	92140
228029_at	0.976442	0.298074	7.20504	1.82983e-06	0.000418028	5.08447	ZNF721	170960
235315_at	-1.23304	-0.330257	-7.20157	1.841e-06	0.000419947	5.07827	TSC22D1	8848
235825_at	-0.886001	-0.00100994	-7.20046	1.8446e-06	0.000420347	5.07628
202218_s_at	0.901657	0.250822	7.19913	1.84893e-06	0.000421122	5.07389	FADS2	9415
228063_s_at	-2.61104	-0.738427	-7.19681	1.85648e-06	0.000422476	5.06974	NAP1L5	266812
243287_s_at	1.09477	0.347004	7.19645	1.85765e-06	0.000422476	5.0691
220417_s_at	0.67873	0.0506969	7.19477	1.86314e-06	0.000423276	5.06609	THAP4	51078
213246_at	0.990308	0.339079	7.19452	1.86396e-06	0.000423276	5.06564	TMEM251	26175
210813_s_at	-1.13812	-0.414722	-7.19178	1.87297e-06	0.000425109	5.06073	XRCC4	7518
205072_s_at	-1.22311	-0.406368	-7.18606	1.89192e-06	0.000428128	5.05048	XRCC4	7518
204037_at	0.721866	0.176654	7.18091	1.90913e-06	0.000431378	5.04126	LPAR1	1902
218125_s_at	1.05126	0.0187713	7.17237	1.93807e-06	0.000437049	5.02594	CCDC25	55246
214913_at	1.07975	0.0982735	7.16721	1.95574e-06	0.000440597	5.0167	ADAMTS3	9508
227999_at	0.696813	0.214452	7.16431	1.96577e-06	0.000442418	5.01149	PWWP2B	170394
228373_at	0.881604	0.399632	7.15525	1.99741e-06	0.00044843	4.99522	C16orf72	29035
228822_s_at	-0.755073	-0.100537	-7.14809	2.02283e-06	0.00045235	4.98235	USP16	10600
203822_s_at	0.604804	0.0770206	7.14482	2.03453e-06	0.000454297	4.97647	ELF2	1998
213180_s_at	-0.517725	-0.00392416	-7.13206	2.0809e-06	0.000463968	4.95352	GOSR2	9570
209221_s_at	0.875318	0.348065	7.12992	2.08877e-06	0.00046519	4.94968	OSBPL2	9885
226037_s_at	-1.03281	-0.340454	-7.12979	2.08924e-06	0.00046519	4.94945	TAF9B	51616
207675_x_at	1.10539	0.360727	7.12974	2.08945e-06	0.00046519	4.94934	ARTN	9048
225100_at	0.76321	0.274713	7.12813	2.0954e-06	0.000466058	4.94645	FBXO45	200933
226807_at	0.940615	0.0185552	7.11879	2.13028e-06	0.000473121	4.92964	ZFP1	162239
217859_s_at	-0.933788	-0.163289	-7.11396	2.14857e-06	0.000476022	4.92093	SLC39A9	55334
224841_x_at	0.978047	0.34443	7.11267	2.15347e-06	0.000476412	4.91861	GAS5	60674
224524_s_at	0.65864	0.178838	7.11032	2.16245e-06	0.000478165	4.91437	GPR75-ASB3, ASB3	100302652, 51130
228575_at	1.22276	0.0650739	7.10029	2.20119e-06	0.000485081	4.89629	IL20RB	53833
214279_s_at	-1.81431	-0.0643822	-7.09222	2.23287e-06	0.000489926	4.88173	NDRG2	57447, 102465428
225161_at	-0.927384	-0.307408	-7.09183	2.23441e-06	0.000490027	4.88103	GFM1	85476
207178_s_at	-1.34352	-0.415121	-7.09151	2.23567e-06	0.000490067	4.88046	FRK	2444
204181_s_at	0.980793	0.349583	7.08412	2.26514e-06	0.000495149	4.86712	ZBTB43	23099
209846_s_at	1.07525	-0.0627806	7.08407	2.26538e-06	0.000495149	4.86701	BTN3A2	11118
202036_s_at	1.3641	0.00457616	7.08189	2.27415e-06	0.000496828	4.86307	SFRP1	6422
206214_at	-1.30254	-0.336133	-7.07778	2.29078e-06	0.000499816	4.85566	PLA2G7	7941
226513_at	0.711881	0.208768	7.07758	2.29158e-06	0.000499816	4.8553	ASB7	140460
214259_s_at	-0.844699	-0.308094	-7.07742	2.29223e-06	0.000499816	4.85501	AKR7A2	8574
239035_at	1.45158	0.451261	7.07476	2.30308e-06	0.000501685	4.8502	MTHFR	4524
225239_at	1.90941	0.57573	7.07451	2.30411e-06	0.000501685	4.84975	NEAT1	283131, 693197
229488_at	0.867876	0.216957	7.06904	2.32657e-06	0.000506332	4.83987	OTUD7B	56957
210379_s_at	1.28205	0.317935	7.06451	2.34537e-06	0.000509449	4.83167	TLK1	9874
225582_at	1.42025	0.537608	7.06334	2.35025e-06	0.000510265	4.82955	ITPRIP	85450
219093_at	0.815619	0.0837172	7.06204	2.3557e-06	0.000511117	4.82719	PID1	55022
230892_at	-1.21939	-0.212859	-7.0608	2.3609e-06	0.000511451	4.82495
206363_at	1.49307	-0.084542	7.05423	2.38859e-06	0.000515392	4.81307	MAF	4094
203882_at	-1.13002	-0.411204	-7.05297	2.39394e-06	0.000515813	4.81079	IRF9,	10379
226173_at	0.636428	0.260853	7.04741	2.41773e-06	0.000519462	4.80072	TBC1D25	4943
223206_s_at	-0.649562	-0.182303	-7.04085	2.44612e-06	0.000524571	4.78883	NMRAL1	57407
230286_at	-1.22036	-0.305131	-7.03778	2.45951e-06	0.000526697	4.78327	SLC6A11	6538
204804_at	-0.997196	-0.284231	-7.03748	2.46082e-06	0.000526729	4.78273	TRIM21	6737
220911_s_at	1.45213	0.10995	7.03569	2.46866e-06	0.00052816	4.77949	NYNRIN	57523
200648_s_at	-0.937146	-0.447571	-7.03354	2.47813e-06	0.000529936	4.77559	GLUL	2752
202537_s_at	-0.698012	-0.0414204	-7.03215	2.4843e-06	0.000531005	4.77306	CHMP2B	25978
228010_at	1.3321	0.530389	7.02379	2.52153e-06	0.000537195	4.75791	PPP2R2C	5522
211755_s_at	-0.713161	-0.230446	-7.015	2.56136e-06	0.000544153	4.74194	ATP5F1	515
223220_s_at	-1.31996	-0.759502	-7.00849	2.59126e-06	0.00054871	4.73013	PARP9	83666
219566_at	0.856666	0.271231	7.00123	2.62501e-06	0.000554052	4.71694	PLEKHF1	79156
201987_at	0.661114	0.264196	6.99892	2.63588e-06	0.00055583	4.71274	MED13	9969
238084_at	0.940539	0.323865	6.99593	2.64996e-06	0.000557766	4.70731	PCGF3	10336
235309_at	0.979405	0.219461	6.99368	2.66066e-06	0.000558983	4.7032	RPS15A	6210
202684_s_at	-1.3682	-0.0526546	-6.99291	2.66433e-06	0.000559247	4.7018	RNMT	8731
AFFX-HUMISGF3A/M97935_3_at	-0.915568	-0.725392	-6.9929	2.66438e-06	0.000559247	4.70178	STAT1	6772
230002_at	1.13444	0.0153643	6.98677	2.69368e-06	0.000564096	4.69064	GPSM2	29899
228832_at	-0.573692	-0.125671	-6.98623	2.69627e-06	0.000564379	4.68966		90024
228853_at	-0.960582	-0.294121	-6.98349	2.70952e-06	0.000565332	4.68467	STYX	6815
202084_s_at	0.935877	0.289324	6.98292	2.7123e-06	0.000565652	4.68363	SEC14L1	6397
207291_at	1.16773	-0.197281	6.9795	2.72893e-06	0.000568121	4.6774	PRRG4	79056
235197_s_at	0.997796	0.406022	6.97613	2.74542e-06	0.000570466	4.67127	OSTM1	28962
224046_s_at	1.36006	0.306422	6.96582	2.79652e-06	0.000579057	4.65248	PDE7A	5150
1555996_s_at	-0.912363	-0.441835	-6.96573	2.79695e-06	0.000579057	4.65233	EIF4A2, SNORA4, SNORA63	1974, 100302143, 619568
244025_at	1.55875	0.553973	6.95614	2.84535e-06	0.000586407	4.63485	ITPRIP	85450
203974_at	-0.679051	-0.187981	-6.95547	2.84877e-06	0.000586582	4.63363	PUDP	8226
232436_at	-0.63891	-0.0672377	-6.95174	2.86789e-06	0.000589451	4.62682	ZNF274	10782
239043_at	1.53521	0.22646	6.9482	2.88614e-06	0.000592453	4.62036	ZNF404	342908
227523_s_at	-0.516101	-0.0891166	-6.94764	2.88901e-06	0.000592453	4.61934	PHF20L1	51105
218651_s_at	1.16856	0.500377	6.94659	2.89445e-06	0.000593034	4.61743	LARP6	55323
204735_at	0.872185	0.314384	6.94102	2.9235e-06	0.000597639	4.60726	PDE4A	5141
217978_s_at	0.550734	0.173543	6.93716	2.94382e-06	0.000600984	4.6002	UBE2Q1	55585
218418_s_at	1.04763	0.339101	6.93559	2.95208e-06	0.000602085	4.59735	KANK2	25959
210087_s_at	-1.12588	-0.0298188	-6.93435	2.9587e-06	0.00060267	4.59506	MPZL1	9019
218710_at	-1.07201	-0.384369	-6.93301	2.96577e-06	0.000603299	4.59263	TTC27	55622
212552_at	1.4526	0.46923	6.93112	2.9759e-06	0.000605088	4.58916	HPCAL1	3241
230442_at	-0.697391	-0.0430596	-6.92341	3.01734e-06	0.000611874	4.57508	MTHFSD	64779
224160_s_at	-0.811986	-0.28984	-6.92003	3.03571e-06	0.00061505	4.5689	ACAD9	28976
212735_at	1.12122	0.365131	6.91851	3.04401e-06	0.000616457	4.56611	RUBCN	9711, 100126321
201738_at	0.774934	0.331766	6.91241	3.07751e-06	0.000621933	4.55497	EIF1B	10289
205467_at	-0.964821	-0.357512	-6.9115	3.08255e-06	0.000622322	4.5533	CASP10	843
213019_at	-1.23021	-0.392367	-6.9086	3.09865e-06	0.000624499	4.548	RANBP6	26953
218613_at	1.34833	-0.0146787	6.90566	3.1151e-06	0.000626847	4.5426	PSD3	23362
203208_s_at	0.826209	0.0210275	6.90128	3.1397e-06	0.000630834	4.53459	MTFR1	9650
210785_s_at	1.72789	0.29506	6.89893	3.153e-06	0.00063316	4.53029	THEMIS2	9473
206972_s_at	0.864238	0.0282195	6.89655	3.16655e-06	0.000634494	4.52592	GPR161	23432
226258_at	1.18211	0.375071	6.88627	3.22567e-06	0.000644069	4.50708	AMN1	196394
230556_at	-1.11671	-0.366424	-6.88548	3.23023e-06	0.000644483	4.50564	IMMP1L	196294
225679_at	0.545737	0.209897	6.88542	3.23057e-06	0.000644483	4.50553	NAA30	122830
222705_s_at	-0.976777	-0.415332	-6.88161	3.25284e-06	0.000648073	4.49853	SLC25A15	10166
236172_at	1.373	0.328136	6.881	3.25642e-06	0.000648501	4.49742	LTB4R	1241
224817_at	1.22269	0.430922	6.87226	3.30808e-06	0.000656776	4.48138	SH3PXD2A	9644
208003_s_at	1.14678	0.540367	6.86809	3.33302e-06	0.000661069	4.47373	NFAT5	10725
226468_at	0.6249	0.117162	6.86792	3.33406e-06	0.000661069	4.47342	RNF115	27246
222879_s_at	-1.26346	-0.431872	-6.86597	3.3458e-06	0.00066253	4.46984	POLH	5429
229022_at	0.769661	0.133427	6.86559	3.34807e-06	0.000662692	4.46915	ZFX	7543
235086_at	-3.19218	-0.896021	-6.85599	3.40654e-06	0.000672217	4.45151	THBS1	7057
201762_s_at	-0.640819	-0.428566	-6.85078	3.43877e-06	0.000676678	4.44192	PSME2P2, PSME2,	5721, 102465801
204106_at	0.969474	0.392854	6.85042	3.44098e-06	0.000676678	4.44127	TESK1	7016
219030_at	-0.802381	-0.296793	-6.8452	3.47355e-06	0.000680715	4.43167	TPRKB	51002
200965_s_at	0.734779	0.286762	6.84199	3.49373e-06	0.000683265	4.42577	ABLIM1	3983
210987_x_at	-1.75165	-0.66895	-6.84159	3.49628e-06	0.000683265	4.42503	TPM1	7168
236487_at	-1.14337	-0.559323	-6.83865	3.51491e-06	0.000685571	4.41962	SCLT1	132320
227777_at	0.75844	-0.046761	6.82982	3.57144e-06	0.000694065	4.40337
214075_at	0.59532	0.148324	6.82947	3.57372e-06	0.000694065	4.40272	NENF	29937
202259_s_at	-0.972164	-0.284425	-6.82191	3.62289e-06	0.000701517	4.3888	N4BP2L2	10443
235678_at	0.965489	0.0506051	6.81614	3.66089e-06	0.000705733	4.37817	GM2A	2760
227919_at	1.35109	0.258922	6.81476	3.67003e-06	0.000706735	4.37563	, UCA1	652995
235643_at	-1.76665	-0.656159	-6.80456	3.73843e-06	0.000717779	4.35683	SAMD9L	219285
228736_at	0.981677	0.377038	6.79699	3.79009e-06	0.000726166	4.34285	HELQ	113510
213032_at	1.41376	0.0932427	6.79408	3.81012e-06	0.000728775	4.33748	NFIB	4781
204508_s_at	1.75721	0.120621	6.7922	3.82312e-06	0.000730648	4.33401	CA12	771
209481_at	1.32638	0.609116	6.78854	3.84861e-06	0.0007349	4.32724	SNRK	54861
201688_s_at	-0.665211	-0.334726	-6.78831	3.85022e-06	0.0007349	4.32682	TPD52	7163
226631_at	-1.05246	-0.372929	-6.78227	3.89259e-06	0.000742054	4.31567	METTL10	399818
221531_at	-1.08231	-0.396742	-6.78008	3.9081e-06	0.000744698	4.31162	, WDR61	80349
229784_at	-1.07536	-0.41344	-6.77593	3.93769e-06	0.000749394	4.30394	MIR503HG	84848, 494336
229812_at	0.939509	-0.0271198	6.76498	4.01677e-06	0.000760943	4.28369	USP48	84196
227259_at	-0.839698	-0.289862	-6.76008	4.05269e-06	0.000766469	4.27462	CD47	961
228846_at	2.20291	1.074	6.75729	4.07326e-06	0.00076908	4.26947	MXD1	4084
205525_at	-1.4073	-0.41643	-6.75649	4.07921e-06	0.000769885	4.26798	CALD1	800
204963_at	-0.865223	0.147106	-6.74849	4.13899e-06	0.00077894	4.25316	SSPN	8082
201695_s_at	-0.77569	0.0720281	-6.74846	4.13918e-06	0.00077894	4.25312	PNP	4860
208892_s_at	1.02169	0.409346	6.74172	4.19027e-06	0.000786794	4.24062	DUSP6	1848
235232_at	0.649813	0.259623	6.74158	4.19129e-06	0.000786794	4.24037	GMEB1	10691
218581_at	0.81488	0.318864	6.74017	4.20206e-06	0.000787051	4.23776	ABHD4	63874
213813_x_at	-1.43168	-0.550143	-6.73977	4.20514e-06	0.00078712	4.23701
230406_at	1.0333	0.431128	6.73496	4.24217e-06	0.000792745	4.22809	ASS1	445
213776_at	0.891523	0.310675	6.72399	4.32779e-06	0.000805436	4.20774
209188_x_at	-0.597739	-0.0323558	-6.72316	4.33432e-06	0.000806322	4.2062	DR1	1810
213998_s_at	-0.840703	-0.0250281	-6.71429	4.40493e-06	0.000816538	4.18974	DDX17	10521
201848_s_at	-1.54575	-0.462421	-6.70787	4.45681e-06	0.000824054	4.17782	BNIP3, BNIP3P1	664
218809_at	0.669378	0.196381	6.70627	4.46986e-06	0.000825	4.17484	PANK2	80025
AFFX-HUMISGF3A/M97935_MA_at	-0.757764	-0.805203	-6.70613	4.47099e-06	0.000825	4.17458	STAT1	6772
203402_at	0.986772	0.392859	6.70492	4.48093e-06	0.000826162	4.17232	KCNAB2	8514
206247_at	1.21206	0.31287	6.70423	4.48656e-06	0.000826865	4.17104	MICB	4277
221477_s_at	-0.725062	-0.106286	-6.69953	4.52518e-06	0.000832535	4.16231	SOD2	6648, 100129518
210976_s_at	1.18273	0.00139017	6.69882	4.53109e-06	0.000832535	4.16098	PFKM	5213
221922_at	0.975682	-0.143724	6.67882	4.69974e-06	0.000857125	4.12377	GPSM2	29899
210993_s_at	-0.888494	-0.274761	-6.67207	4.75812e-06	0.000864791	4.11119	SMAD1	4086
236077_at	-1.35078	-0.390591	-6.67201	4.75865e-06	0.000864791	4.11108	GANC	2595
218883_s_at	-1.45168	-0.706537	-6.66466	4.82305e-06	0.000874483	4.09739	CENPU	79682
211932_at	-1.0783	-0.320946	-6.66458	4.82376e-06	0.000874483	4.09724	HNRNPA3	220988, 100616394
212055_at	-0.806679	-0.283143	-6.65772	4.88475e-06	0.000882726	4.08444	TPGS2	25941
217672_x_at	0.752818	0.269244	6.65344	4.92319e-06	0.000888795	4.07646
227531_at	0.701955	0.0653002	6.65017	4.95278e-06	0.000892429	4.07036	CLOCK	9575
1566901_at	1.04843	0.465584	6.64863	4.96676e-06	0.000893287	4.06749
226142_at	-1.50374	-0.723226	-6.64392	5.00978e-06	0.000899246	4.05871	GLIPR1	11010
204556_s_at	1.23876	-0.102469	6.63704	5.07337e-06	0.00090851	4.04586	DZIP1	22873
226936_at	-1.41682	-1.03066	-6.63356	5.1059e-06	0.000913155	4.03935	CENPW	387103
214657_s_at	-1.35114	-0.140868	-6.62643	5.17315e-06	0.00092166	4.02603	, NEAT1	283131, 693197
203026_at	0.522725	0.185383	6.6237	5.19917e-06	0.000924486	4.02092	ZBTB5	9925
221984_s_at	1.10153	0.342294	6.61958	5.23864e-06	0.000929686	4.01322	FAM134A	79137
204533_at	-2.37571	-1.74399	-6.6179	5.25482e-06	0.000932195	4.01008	CXCL10	3627
230296_at	1.65534	0.671372	6.61636	5.26972e-06	0.000934108	4.00719	C16orf52	730094, 102725138
226319_s_at	-0.681319	-0.242267	-6.61562	5.27686e-06	0.00093501	4.00582	ALYREF	10189
204011_at	2.9414	0.988533	6.61528	5.28017e-06	0.000935233	4.00518	SPRY2	10253
203264_s_at	-0.866079	-0.267624	-6.61299	5.3024e-06	0.000937345	4.0009	ARHGEF9	23229
221746_at	0.719221	0.202527	6.61091	5.3227e-06	0.000940567	3.99701	UBL4A	8266
212736_at	0.849981	0.110122	6.60462	5.38462e-06	0.000950033	3.98523	C16orf45	89927
221788_at	0.954678	0.395148	6.60393	5.39144e-06	0.00095013	3.98394	PGM3	5238
207850_at	-1.93192	0.285302	-6.59735	5.45709e-06	0.000956881	3.97161	CXCL3	2921
205547_s_at	-2.86954	-1.12663	-6.58618	5.57046e-06	0.000971889	3.95068	TAGLN	6876
203284_s_at	0.709464	-0.0362755	6.57702	5.6652e-06	0.000984641	3.9335	HS2ST1	9653
217682_at	-0.915379	0.0613598	-6.57585	5.67738e-06	0.000985549	3.93132	, C16orf72	29035
209337_at	1.79848	-0.0579744	6.56796	5.76059e-06	0.000997031	3.9165	PSIP1	11168
223154_at	-0.956777	-0.319435	-6.56476	5.7947e-06	0.00100217	3.91049	MRPL1	65008
200887_s_at	-0.868094	-0.68939	-6.55958	5.85032e-06	0.00101102	3.90076	STAT1	6772
227184_at	1.20567	0.475623	6.55445	5.90592e-06	0.00101792	3.89113	PTAFR	5724
229920_at	1.00917	0.434153	6.55324	5.9192e-06	0.00101944	3.88884	RBCK1	10616
202053_s_at	0.908653	0.213341	6.55276	5.9244e-06	0.00101995	3.88795	ALDH3A2	224
235025_at	-1.0637	-0.368472	-6.55209	5.93171e-06	0.00102031	3.88669	WDR89	112840
206020_at	-0.923882	-0.113206	-6.55039	5.95033e-06	0.00102209	3.8835	SOCS6	9306
233058_at	1.08195	-0.0620301	6.53709	6.09839e-06	0.0010428	3.85847	GPSM2	29899
1570125_at	-0.976341	-0.107341	-6.52764	6.20583e-06	0.00105799	3.84069	GHET1	102723099
230180_at	-1.06028	-0.144403	-6.52231	6.26726e-06	0.00106454	3.83066	DDX17	10521
218371_s_at	1.0906	0.436813	6.51462	6.35711e-06	0.00107571	3.81617	PSPC1	55269
235609_at	-1.41022	-0.930251	-6.51266	6.38025e-06	0.00107863	3.81247	BRIP1	83990
211352_s_at	0.71064	0.205742	6.50943	6.41843e-06	0.00108367	3.80639	NCOA3	8202
204679_at	1.45762	0.629308	6.50884	6.42555e-06	0.0010838	3.80526	KCNK1	3775
236359_at	2.21728	0.0147571	6.50584	6.4613e-06	0.00108849	3.79961	SCN4B	6330
233595_at	1.00489	0.380989	6.49115	6.63958e-06	0.00111316	3.7719
200924_s_at	1.44118	0.727656	6.48922	6.66344e-06	0.00111634	3.76825	SLC3A2	6520
205252_at	0.755665	-0.0241547	6.48831	6.67471e-06	0.00111781	3.76653	ZNF174	7727
231698_at	-1.3729	-0.317302	-6.47425	6.85105e-06	0.00114104	3.73998
210237_at	0.827062	0.384042	6.47397	6.8546e-06	0.00114122	3.73945	ARTN	9048
235198_at	0.831161	0.302389	6.47247	6.87378e-06	0.00114357	3.73661	OSTM1	28962
208937_s_at	1.7259	0.54877	6.46386	6.98457e-06	0.00115693	3.72033	ID1	3397
209344_at	-0.902588	-0.279559	-6.46345	6.9899e-06	0.00115713	3.71955	TPM4,	7171
235745_at	1.07044	0.386546	6.4633	6.99185e-06	0.00115713	3.71927	ERN1	2081
225639_at	-0.734697	-0.268501	-6.46289	6.99711e-06	0.00115732	3.7185	SKAP2	8935
213017_at	0.983656	0.598038	6.46073	7.02532e-06	0.00116072	3.7144	ABHD3	171586
203219_s_at	-0.553319	-0.21041	-6.45079	7.15632e-06	0.0011768	3.69559	APRT	353
223723_at	-1.26393	-0.00122139	-6.44982	7.16919e-06	0.00117849	3.69376	MELTF	4241
203596_s_at	-1.34845	-0.473619	-6.44755	7.19957e-06	0.00118263	3.68946	IFIT5	24138
213532_at	0.682503	0.298403	6.44697	7.20729e-06	0.00118274	3.68837	ADAM17	6868
224173_s_at	-1.16417	-0.489182	-6.44692	7.20799e-06	0.00118274	3.68827	, MRPL30	51263
232102_at	0.775626	0.248427	6.44486	7.23574e-06	0.00118685	3.68436	METTL6	131965
231408_at	1.29971	0.290842	6.44458	7.23944e-06	0.00118685	3.68384	TMEM92	162461
238513_at	1.5634	-0.121153	6.43761	7.33399e-06	0.00119779	3.67062	PRRG4	79056
215913_s_at	1.39833	0.613356	6.43715	7.34019e-06	0.00119837	3.66976	GULP1	51454
219364_at	-0.714195	-0.219457	-6.43429	7.37945e-06	0.00120349	3.66433	DHX58	79132
1564307_a_at	-0.994204	-0.253233	-6.42782	7.46888e-06	0.00121416	3.65207	A2ML1	144568
217777_s_at	1.0912	-0.0635329	6.425	7.50823e-06	0.00121898	3.64672	HACD3	51495
1560222_at	0.885798	0.492741	6.42188	7.55197e-06	0.00122416	3.64081
226416_at	0.531749	0.0924259	6.42059	7.57019e-06	0.0012259	3.63835	ERI1	90459
206004_at	-0.857443	-0.195464	-6.41629	7.63104e-06	0.00123346	3.6302	TGM3	7053
225752_at	0.876395	0.412345	6.41395	7.66447e-06	0.0012367	3.62575	NIPA1	123606
242037_at	0.802477	0.515993	6.41205	7.69163e-06	0.00123929	3.62215	ASPH	444
1557701_s_at	-1.23522	-0.46355	-6.40564	7.78423e-06	0.00125078	3.60997	POLH	5429
227517_s_at	-1.23621	-0.451093	-6.40559	7.78494e-06	0.00125078	3.60987	GAS5	60674
[truncated: 416 more rows]

## Sheet: NIC14
AffyIDs	logFC	AveExpr	t	P.Value	adj.P.Val	B	Gene_Symbol	EntrezID
235149_at	-0.840198	-0.202803	-8.61104	1.76097e-07	0.0800973	1.63449	PGM2L1	283209
241754_at	0.642067	-0.118548	5.98613	1.72326e-05	1	0.114149	SCAI	286205
220422_at	-0.388214	-0.0609696	-5.15405	8.92659e-05	1	-0.569558	UBQLN3	50613
215085_x_at	0.365781	0.135181	4.1799	0.000675715	1	-1.51143	DLEC1	9940
37986_at	0.43019	0.283979	4.17166	0.000687612	1	-1.52002	EPOR	2057
206972_s_at	-0.519138	0.0282195	-4.14268	0.00073117	1	-1.55028	GPR161	23432
235281_x_at	-0.469976	-0.324716	-4.03915	0.000910898	1	-1.65933	AHNAK	79026
214287_s_at	-0.45573	-0.0839547	-4.02977	0.000929252	1	-1.66929
1552470_a_at	-0.540845	-0.306319	-3.96589	0.00106451	1	-1.73737	ABHD11	83451
239292_at	0.530486	0.469724	3.75347	0.00167423	1	-1.96736
230442_at	0.375278	-0.0430596	3.7256	0.00177684	1	-1.99792	MTHFSD	64779
218657_at	0.446332	0.29994	3.68003	0.00195842	1	-2.04808	RAPGEFL1	51195
1560222_at	0.507402	0.492741	3.67858	0.00196447	1	-2.04967
238780_s_at	0.376672	0.244204	3.66881	0.0020059	1	-2.06046	KCNJ5	3762
238174_at	0.368256	0.216909	3.57077	0.00247291	1	-2.16917
235372_at	-0.429872	0.00656695	-3.56008	0.00253002	1	-2.18108	FCRLA	84824
222434_at	0.579081	-0.0262238	3.4922	0.00292442	1	-2.25693	ENAH	55740
207022_s_at	0.380602	-0.153453	3.4872	0.00295577	1	-2.26253	LDHC	3948
204735_at	0.435359	0.314384	3.46468	0.00310126	1	-2.2878	PDE4A	5141
219737_s_at	0.412783	-0.12327	3.43535	0.00330137	1	-2.32075	PCDH9	5101
234710_s_at	-0.294799	0.134538	-3.40946	0.00348871	1	-2.34989	PARP6	56965
239883_s_at	0.395833	0.203907	3.38263	0.00369401	1	-2.38016
230490_x_at	-0.441244	-0.369471	-3.33232	0.00411177	1	-2.43702	RSU1	6251
219295_s_at	-0.562332	0.526965	-3.31211	0.00429244	1	-2.45991	PCOLCE2	26577
1569453_a_at	0.270885	0.146237	3.30251	0.004381	1	-2.47079
209122_at	-0.664273	0.648669	-3.0715	0.00714877	1	-2.73392	PLIN2	123
53912_at	-0.278292	-0.196596	-2.96772	0.00889485	1	-2.85262	SNX11	29916
213403_at	0.333074	0.725967	2.9626	0.00899098	1	-2.85848	MFSD9	84804

## Sheet: NIC474
AffyIDs	logFC	AveExpr	t	P.Value	adj.P.Val	B	Gene_Symbol	EntrezID
230913_at	2.12032	0.876861	12.446	9.09954e-10	0.000413891	10.7389
232081_at	1.62843	1.01238	11.7616	2.10373e-09	0.000478439	10.1766
226834_at	1.85875	1.5612	9.54177	4.27225e-08	0.00647741	7.99623	CLMP	79827
211113_s_at	1.809	0.992553	9.1575	7.57457e-08	0.00861321	7.55537	ABCG1	9619
204174_at	1.41684	-0.0246841	8.76292	1.38797e-07	0.0126263	7.08081	ALOX5AP	241
238780_s_at	0.870252	0.244204	8.4763	2.18004e-07	0.0146612	6.7217	KCNJ5	3762
204567_s_at	1.73391	1.03074	8.45473	2.25632e-07	0.0146612	6.69416	ABCG1	9619
37892_at	1.09588	0.238192	8.17685	3.53189e-07	0.0200809	6.33311	COL11A1	1301
209049_s_at	1.05245	0.406951	7.72303	7.49811e-07	0.0378945	5.71731	ZMYND8	23613
223487_x_at	-0.855423	-0.565875	-7.65137	8.46519e-07	0.0385038	5.61705	GNB4	59345
233723_at	0.744783	0.00665718	7.57735	9.60197e-07	0.039704	5.5126
230193_at	0.791977	-0.131425	7.38539	1.33583e-06	0.0459182	5.23754	WDR66	144406
239292_at	1.0435	0.469724	7.38333	1.34059e-06	0.0459182	5.23457
207342_at	1.46093	0.265044	7.34013	1.44499e-06	0.0459182	5.17181	CNGB1	1258
204638_at	1.23056	0.376944	7.31322	1.51429e-06	0.0459182	5.13255	ACP5	54
216235_s_at	0.955735	0.282864	7.25777	1.66822e-06	0.0471817	5.05131	EDNRA	1909
235149_at	-0.705066	-0.202803	-7.2261	1.76342e-06	0.0471817	5.00466	PGM2L1	283209
213245_at	1.38095	0.234029	7.13388	2.0742e-06	0.0524137	4.86791	ADCY1	107
221081_s_at	0.74677	0.475906	6.99422	2.65809e-06	0.0636331	4.65807	DENND2D	79961
201141_at	1.17469	0.0951375	6.93374	2.96194e-06	0.0673617	4.56618	GPNMB	10457
232122_s_at	0.75659	-0.00200642	6.81211	3.68767e-06	0.0753162	4.37954	VEPH1	79674
227176_at	0.783318	0.221827	6.77086	3.97405e-06	0.0753162	4.31567	SLC2A13	114134
206969_at	1.28859	0.563994	6.66754	4.79768e-06	0.0872886	4.15442	KRT34	3885
204464_s_at	1.46991	0.517272	6.6016	5.41461e-06	0.0895877	4.05057	EDNRA	1909
206376_at	0.780681	0.212194	6.59162	5.51493e-06	0.0895877	4.03479	SLC6A15	55117
235281_x_at	-0.746875	-0.324716	-6.41893	7.5936e-06	0.115411	3.75905	AHNAK	79026
205828_at	2.19785	1.55938	6.41763	7.61204e-06	0.115411	3.75695	MMP3	4314
220779_at	1.06042	0.0923441	6.3909	8.00138e-06	0.1174	3.71381	PADI3	51702
1555292_at	0.862253	0.452569	6.31474	9.22815e-06	0.131169	3.59024	STRIP2	57464
206191_at	0.962479	0.707398	6.28271	9.80106e-06	0.13418	3.53798	ENTPD3	956
1569203_at	0.593483	0.138698	6.21642	1.1107e-05	0.13418	3.42928	CXCL2	2920
228082_at	0.736959	0.760625	6.21194	1.12016e-05	0.13418	3.4219	CLMP	79827
227565_at	0.668983	0.415653	6.21155	1.12099e-05	0.13418	3.42126
210959_s_at	-0.639205	-0.301789	-5.98423	1.72956e-05	0.188488	3.04273	SRD5A1	6715
235334_at	1.46536	0.553365	5.96873	1.78191e-05	0.188488	3.01662	ST6GALNAC3	256435
203505_at	1.25577	0.595078	5.86111	2.19377e-05	0.21692	2.83417	ABCA1	19
204748_at	1.359	0.956403	5.84325	2.27116e-05	0.219794	2.8037	PTGS2	5743
223769_x_at	0.811869	0.182576	5.80033	2.46886e-05	0.233949	2.73028	HYI	81888
216568_x_at	-0.62443	-0.380345	-5.70108	2.99721e-05	0.264531	2.55939
242127_at	1.17365	-0.173434	5.67584	3.14935e-05	0.265185	2.51568
211421_s_at	0.910349	0.29001	5.61698	3.53609e-05	0.282173	2.41334	RET	5979
236172_at	1.11855	0.328136	5.6058	3.61486e-05	0.283485	2.39385	LTB4R	1241
201858_s_at	1.45898	-0.203555	5.52012	4.28262e-05	0.320755	2.24376	SRGN	5552
209048_s_at	1.04858	0.359019	5.51788	4.30167e-05	0.320755	2.23983	ZMYND8	23613
209821_at	1.87511	-0.437452	5.46524	4.7761e-05	0.339438	2.14703	IL33	90865
211094_s_at	-0.939902	0.196874	-5.44498	4.97278e-05	0.346654	2.11121	NF1	4763
219610_at	0.495575	0.0828226	5.43075	5.11586e-05	0.346654	2.08602	ARHGEF28	64283
236769_at	0.774501	0.681149	5.43066	5.11681e-05	0.346654	2.08585
219221_at	0.53981	0.262933	5.41578	5.27107e-05	0.347469	2.05947	ZBTB38	253461
232297_at	0.677751	0.395858	5.37418	5.72816e-05	0.35691	1.98554
213010_at	0.786489	-0.175901	5.34222	6.10704e-05	0.371356	1.92856	PRKCDBP	112464
214287_s_at	-0.603693	-0.0839547	-5.33812	6.15755e-05	0.371356	1.92123
1554997_a_at	1.4257	0.966589	5.30422	6.59141e-05	0.379505	1.86061	PTGS2	5743
220422_at	-0.395617	-0.0609696	-5.25233	7.31731e-05	0.410897	1.7675	UBQLN3	50613
223809_at	1.08558	-0.381131	5.20597	8.03554e-05	0.431268	1.68396	RGS18	64407
222664_at	0.657587	0.38347	5.18441	8.39383e-05	0.431268	1.64502	KCTD15	79047
203435_s_at	0.925558	0.292893	5.18179	8.43859e-05	0.431268	1.64027	MME	4311
232914_s_at	-0.717254	-0.492876	-5.16924	8.65586e-05	0.437456	1.61757	SYTL2	54843
206371_at	1.4667	0.671738	5.13968	9.19067e-05	0.446064	1.564	FOLR3	2352
217166_at	-0.418597	-0.232147	-5.12932	9.38613e-05	0.446064	1.54519	PTMAP1
1555733_s_at	-0.630298	-0.442527	-5.11965	9.57234e-05	0.446064	1.52762	AP1S3	130340
236079_at	0.572941	0.163431	5.11899	9.58513e-05	0.446064	1.52643
222668_at	0.549538	0.353753	5.09377	0.000100897	0.458928	1.48055	KCTD15	79047
229296_at	0.761191	0.419438	5.08319	0.000103094	0.46428	1.46127	LINC01503	100506119
1552307_a_at	-0.656326	0.13201	-5.0545	0.000109303	0.482682	1.40893	TTC39C	125488
239903_at	0.698577	0.581032	5.01646	0.000118131	0.500656	1.33937	TPBG	7162
213684_s_at	0.590481	0.120394	4.98772	0.000125285	0.5088	1.28668	PDLIM5	10611
205401_at	-0.463807	-0.29084	-4.96772	0.000130523	0.520773	1.24996	AGPS	8540
204151_x_at	0.677935	1.51993	4.94042	0.000138038	0.541263	1.19975	AKR1C1, AKR1C2	1645, 1646
207850_at	1.44547	0.285302	4.93618	0.000139247	0.541335	1.19193	CXCL3	2921
39650_s_at	0.584387	0.351161	4.91451	0.000145584	0.55335	1.152	PCNX2	80003
226237_at	1.15653	0.131811	4.87499	0.000157914	0.588745	1.07901	COL8A1	1295
AFFX-HUMISGF3A/M97935_5_at	-0.68608	-0.695932	-4.83148	0.000172735	0.620266	0.998406	STAT1	6772
239883_s_at	0.565305	0.203907	4.83087	0.000172955	0.620266	0.997263
224399_at	0.517606	-0.596715	4.82983	0.000173326	0.620266	0.995338	PDCD1LG2	80380
209008_x_at	-0.666362	-0.438949	-4.80585	0.000182125	0.621819	0.950823	KRT8P3, KRT8	3856
235197_s_at	0.686463	0.406022	4.79943	0.000184557	0.621819	0.938893	OSTM1	28962
210580_x_at	0.446611	0.344622	4.79483	0.000186322	0.623149	0.930335	SULT1A4, SLX1B-SULT1A4, SLX1A-SULT1A3, SULT1A3	445329, 105369243, 100526830, 100526831, 6818
203083_at	1.13977	-0.0181223	4.77764	0.000193067	0.62726	0.898349	THBS2	7058
239787_at	1.23279	-0.401221	4.75399	0.000202757	0.654067	0.854294	KCTD4	386618
224856_at	-0.734408	-0.507443	-4.74207	0.000207829	0.661053	0.832058	FKBP5	2289
1568812_at	0.641743	0.726719	4.7255	0.00021509	0.6794	0.801144		100507140
206522_at	1.19726	-0.38424	4.72191	0.000216698	0.679758	0.794439	MGAM	8972
220122_at	1.76126	0.991974	4.7086	0.000222769	0.687696	0.769563	MCTP1	79772
219973_at	0.73076	0.266691	4.70645	0.000223765	0.687696	0.765546	ARSJ	79642
1555118_at	0.904502	0.47157	4.70256	0.00022558	0.688623	0.758269	ENTPD3	956
240354_at	0.570955	-0.128574	4.69314	0.000230041	0.69617	0.740634
222456_s_at	-0.681702	0.244642	-4.67454	0.000239108	0.704736	0.705812	LIMA1	51474
221618_s_at	-0.848794	-0.582517	-4.67244	0.000240155	0.704736	0.701875	TAF9B	51616
226907_at	-0.513106	-0.358267	-4.63498	0.000259625	0.738062	0.631627	PPP1R14C	81706
229202_at	0.69998	0.467437	4.62374	0.000265779	0.746231	0.610506	PCNX2	80003
[truncated: 193 more rows]
