# Supplementary material for: AKR1C1 as a Biomarker for Differentiating the Biological Effects of Combustible from Non-Combustible Tobacco Products
Source: Preprints.org preprint supplement (doi:10.20944/preprints201701.0111.v1), 2017-01-25
Supplement: Supplementary file 8 [file Sup_Table5_SigGenes_101B.xlsx]

## Sheet: TPM
AffyIDs	logFC	AveExpr	t	P.Value	adj.P.Val	B	Gene_Symbol	EntrezID
204279_at	-1.95495	-0.455621	-22.4423	3.18923e-11	1.45062e-05	15.0919	PSMB9	5698
205207_at	-2.05445	-0.93021	-20.1507	1.13619e-10	1.58987e-05	14.1579	IL6	3569
205828_at	3.40359	1.02831	19.8452	1.35981e-10	1.58987e-05	14.0209	MMP3	4314
209469_at	-2.07814	-0.540752	-19.7294	1.45657e-10	1.58987e-05	13.9682	GPM6A	2823
204475_at	4.23549	1.70345	19.4257	1.74769e-10	1.58987e-05	13.8275	MMP1	4312
204820_s_at	-1.37519	-0.206421	-17.7645	4.97741e-10	3.77328e-05	12.9973	BTN3A3, BTN3A2	10384, 11118
243056_at	1.32857	0.360741	17.3961	6.35613e-10	4.13011e-05	12.798	C12orf60	144608
207574_s_at	1.55935	0.744	16.1747	1.48158e-09	8.42366e-05	12.0937	GADD45B	4616
1555852_at	-1.85783	-0.359853	-15.8544	1.86776e-09	9.43941e-05	11.8971	PSMB8-AS1	100507463
226333_at	1.62582	0.630648	15.6593	2.15551e-09	9.80428e-05	11.7748	IL6R	3570
200665_s_at	-1.28632	-0.356838	-15.4535	2.51142e-09	9.89717e-05	11.6436	SPARC	6678
243024_at	1.57086	0.461569	15.4015	2.61111e-09	9.89717e-05	11.6101	ZNF394	84124
205969_at	1.69876	0.0479445	14.968	3.62869e-09	0.000126962	11.325	AADAC	13
237732_at	2.33034	0.621241	14.7288	4.36788e-09	0.000141909	11.1631	PRR9	574414
210004_at	-2.60189	-0.234778	-14.5683	4.95366e-09	0.000150211	11.0527	OLR1	4973
209040_s_at	-1.08545	-0.269773	-14.4236	5.55512e-09	0.000157921	10.9518	PSMB8	5696
209470_s_at	-2.16815	-0.589415	-14.3119	6.07287e-09	0.000162485	10.8731	GPM6A	2823
217833_at	-1.2007	-0.406475	-13.9083	8.42554e-09	0.000208625	10.5823	SYNCRIP	10492
235250_at	1.15334	0.462202	13.826	9.01665e-09	0.000208625	10.5217	FLCN	201163
209305_s_at	1.5716	0.573751	13.7927	9.26825e-09	0.000208625	10.4971	GADD45B	4616
204614_at	2.586	-0.0244334	13.7462	9.63207e-09	0.000208625	10.4626	SERPINB2	5055
223930_at	1.06991	0.455528	13.6682	1.02787e-08	0.000212511	10.4044
209442_x_at	-1.31128	-0.274279	-13.5536	1.13137e-08	0.000223741	10.3182	ANK3	288
232593_at	-1.14353	0.221597	-13.4773	1.20649e-08	0.000228654	10.2603	NEURL3	93082
203074_at	-1.37725	-0.288051	-13.348	1.34643e-08	0.000244968	10.1612	ANXA8L1, ANXA8	643650, 728113, 653145
226016_at	-1.58817	-0.534265	-13.2908	1.41379e-08	0.000246512	10.1171	CD47	961
227314_at	1.91764	0.726299	13.2506	1.46331e-08	0.000246512	10.0859	ITGA2	3673
227998_at	1.15765	0.31526	13.0653	1.71716e-08	0.000278945	9.94078	S100A16	140576
206385_s_at	-1.70977	-0.441481	-12.9107	1.96513e-08	0.000304338	9.81793	ANK3	288
204743_at	1.08489	0.302548	12.8866	2.00729e-08	0.000304338	9.79856	TAGLN3	29114
201510_at	-1.45176	-0.271214	-12.8158	2.13638e-08	0.000311306	9.74163	ELF3,	1999
205032_at	1.66278	0.543936	12.7877	2.19013e-08	0.000311306	9.71891	ITGA2	3673
212613_at	-0.985301	-0.0828684	-12.7109	2.34451e-08	0.00032315	9.65656	BTN3A2	11118
225007_at	-0.974845	-0.463667	-12.6156	2.55275e-08	0.000331984	9.57852	G3BP1	10146
1558044_s_at	-1.0621	-0.123644	-12.6148	2.55457e-08	0.000331984	9.57787	EXOSC6	118460
1569157_s_at	1.44725	0.717636	12.4167	3.05417e-08	0.000385885	9.41355	ZNF846	162993
206411_s_at	1.06302	0.191945	12.3618	3.21047e-08	0.000391779	9.36752	ABL2	27
1562102_at	2.13163	1.39996	12.3167	3.34533e-08	0.000391779	9.32953
213423_x_at	1.50226	0.793745	12.303	3.38762e-08	0.000391779	9.31793	TUSC3	7991
230012_at	1.17239	0.383589	12.2845	3.44536e-08	0.000391779	9.30231	LINC00324	284029
228996_at	1.06723	0.272987	12.1681	3.8347e-08	0.000425416	9.20324	RC3H1	149041
242397_at	-2.5147	-0.445663	-12.1008	4.08133e-08	0.000441997	9.14545
215043_s_at	1.36862	0.396622	11.9776	4.57798e-08	0.000484253	9.03878
206157_at	-2.28107	-0.81263	-11.895	4.94745e-08	0.000503135	8.96654	PTX3	5806
201232_s_at	0.884809	0.173331	11.8754	5.03957e-08	0.000503135	8.94935	PSMD13	5719
209447_at	-1.3144	-0.17109	-11.8652	5.08834e-08	0.000503135	8.94038	SYNE1	23345
205945_at	1.6365	0.568609	11.8078	5.37231e-08	0.000516043	8.88973	IL6R	3570
228728_at	-1.17961	-0.216502	-11.7872	5.4781e-08	0.000516043	8.87153	CPED1	79974
214430_at	1.21548	0.449213	11.7717	5.55924e-08	0.000516043	8.8578	GLA	2717
226811_at	1.37404	0.639744	11.7224	5.82686e-08	0.000521345	8.81387	FAM46C	54855
219677_at	1.29229	0.435513	11.719	5.8456e-08	0.000521345	8.81087	SPSB1	80176
204925_at	1.25859	0.541045	11.6903	6.008e-08	0.000525525	8.78525	CTNS	1497
239587_at	-1.94929	-0.377838	-11.6684	6.13517e-08	0.000526523	8.76565	TLR3	7098
201010_s_at	-1.79456	-0.534738	-11.6401	6.30365e-08	0.000530964	8.7403	TXNIP	10628
237654_at	1.48665	0.434468	11.6113	6.48099e-08	0.000535086	8.71432	PPP1R36	145376
201695_s_at	1.38816	0.230491	11.5942	6.58787e-08	0.000535086	8.69899	PNP	4860
1555653_at	-1.07461	-0.164934	-11.5519	6.86261e-08	0.000547623	8.66069	MT-ND5	4540
207247_s_at	1.13268	0.438091	11.4884	7.29765e-08	0.000572297	8.60301	ZFX, ZFY	7543, 7544
229842_at	-1.63706	-0.181935	-11.4622	7.48527e-08	0.000572756	8.57917	ELF3	1999
1554557_at	1.17109	0.224672	11.4526	7.55535e-08	0.000572756	8.57041	ATP11B	23200
235681_at	-1.04073	0.277134	-11.3503	8.34917e-08	0.000600255	8.47645
211030_s_at	1.25098	0.254528	11.3357	8.46937e-08	0.000600255	8.46299	SLC6A6	6533
201325_s_at	1.13744	0.10175	11.3243	8.56531e-08	0.000600255	8.45238	EMP1	2012
232908_at	1.13853	0.348363	11.3054	8.72535e-08	0.000600255	8.43494	ATAD2B	54454
209387_s_at	1.60963	0.173982	11.3034	8.74298e-08	0.000600255	8.43304	TM4SF1	4071
201814_at	-0.793991	-0.0914137	-11.2742	8.99794e-08	0.000600255	8.40595	TBC1D5	9779
238725_at	-1.3976	-0.253596	-11.2708	9.02826e-08	0.000600255	8.40278	IRF1	3659
211414_at	1.03574	0.258152	11.2652	9.0784e-08	0.000600255	8.39755	GLS	2744
203083_at	-1.20934	-0.179303	-11.2621	9.10581e-08	0.000600255	8.39471	THBS2	7058
202481_at	-1.20984	0.015036	-11.0844	1.08631e-07	0.000705863	8.22803	DHRS3	9249
204017_at	-1.19112	-0.170283	-11.0138	1.16601e-07	0.000746982	8.161	KDELR3	11015
212169_at	-0.807188	-0.127968	-10.9871	1.19773e-07	0.000756648	8.13556	FKBP9P1, FKBP9	360132, 11328
1552627_a_at	0.829479	0.291948	10.9673	1.22188e-07	0.000761329	8.11664	ARHGAP5,	394
219572_at	-0.982025	-0.152318	-10.9212	1.28018e-07	0.000786877	8.07242	CADPS2	93664
237817_at	1.0841	0.138954	10.8972	1.31161e-07	0.000795442	8.04941	SSR3	6747
1554556_a_at	1.04829	0.226227	10.8286	1.40637e-07	0.000841694	7.98313	ATP11B	23200
209158_s_at	0.861809	0.210193	10.8137	1.42793e-07	0.000843497	7.96867	CYTH2	9266
220617_s_at	-0.947589	-0.256749	-10.7525	1.52019e-07	0.000876964	7.90911	ZNF532	55205
216316_x_at	1.23829	0.257465	10.7506	1.52315e-07	0.000876964	7.90726	, GK	2710
219045_at	0.983342	0.540278	10.7103	1.58749e-07	0.000890974	7.86786	RHOF	54509
241359_at	-1.01899	-0.0241407	-10.6901	1.62082e-07	0.000890974	7.84806	TLCD2	727910
223353_at	0.882974	0.311074	10.6848	1.62982e-07	0.000890974	7.84278	MOB2	81532
205579_at	1.06022	0.126201	10.6773	1.64239e-07	0.000890974	7.83546	HRH1	3269
225399_at	-0.86525	-0.252604	-10.6542	1.68194e-07	0.000890974	7.81277	TSEN15	116461
219474_at	1.18635	0.0472298	10.6489	1.69133e-07	0.000890974	7.80747	C3orf52	79669
201013_s_at	-0.826179	-0.428657	-10.643	1.70156e-07	0.000890974	7.80171	PAICS	10606
1553449_at	2.01318	0.56842	10.6409	1.70527e-07	0.000890974	7.79964
227259_at	-0.926351	-0.278446	-10.6234	1.73638e-07	0.000890974	7.78239	CD47	961
213186_at	-1.08433	-0.495603	-10.6191	1.74419e-07	0.000890974	7.77811	DZIP3	9666
211368_s_at	-1.09986	-0.0414286	-10.5966	1.7853e-07	0.000890974	7.75588	CASP1	834
205633_s_at	0.983481	0.375516	10.5911	1.79557e-07	0.000890974	7.7504	ALAS1	211
229296_at	-1.5548	-0.0188434	-10.5876	1.80213e-07	0.000890974	7.74692	LINC01503	100506119
209457_at	1.96448	0.526954	10.5751	1.82569e-07	0.000892915	7.73452	DUSP5	1847
241027_at	1.11488	0.282431	10.5643	1.84638e-07	0.00089343	7.72376
210015_s_at	1.06904	0.557197	10.5252	1.92301e-07	0.000916006	7.68491	MAP2	4133
204821_at	-1.32653	-0.283384	-10.5201	1.93332e-07	0.000916006	7.6798	BTN3A3	10384
202263_at	1.14313	0.343583	10.4948	1.98513e-07	0.000930857	7.65452	CYB5R1	51706
244455_at	-1.14461	-0.222912	-10.4798	2.01652e-07	0.000935927	7.63951	KCNT2	343450
230043_at	-1.54963	0.24633	-10.4697	2.03807e-07	0.000936376	7.62934
233647_s_at	0.943901	0.279892	10.4541	2.07153e-07	0.000942233	7.61376	CDADC1	81602
205603_s_at	-0.886846	-0.335577	-10.4396	2.10348e-07	0.000947292	7.59911	DIAPH2	1730
226324_s_at	-0.794836	-0.15711	-10.4284	2.12839e-07	0.000949113	7.58784	IFT172	26160
219720_s_at	0.742096	0.179162	10.4142	2.16027e-07	0.000953976	7.57361	GPATCH2L	55668
209714_s_at	-1.10462	-0.512812	-10.3878	2.22121e-07	0.000971457	7.54696	CDKN3	1033
1553670_at	1.36415	0.367874	10.3783	2.24369e-07	0.00097194	7.53732	INTS4	92105
227565_at	-0.94472	-0.0680226	-10.3384	2.34029e-07	0.00100422	7.49691
217167_x_at	1.35362	0.313722	10.3209	2.38408e-07	0.00100681	7.47913	GK,	2710
218861_at	0.751988	0.121538	10.307	2.4196e-07	0.00100681	7.46495	RNF25	64320
1556134_a_at	0.966739	-0.00969153	10.3035	2.42848e-07	0.00100681	7.46143	B3GNT5	84002
223388_s_at	0.911599	0.250757	10.301	2.43486e-07	0.00100681	7.45891	ZFYVE1	53349
1555781_at	1.00765	0.300036	10.2834	2.481e-07	0.00100777	7.4409	PQLC2	54896
238063_at	1.01729	0.08066	10.2832	2.48149e-07	0.00100777	7.44071	TMEM154	201799
209304_x_at	1.37537	0.639865	10.2151	2.66827e-07	0.00107403	7.37102	GADD45B	4616
206448_at	1.62163	0.843129	10.1857	2.75364e-07	0.00109868	7.34076	ZNF365	22891
218966_at	-0.893048	-0.272663	-10.1742	2.78785e-07	0.00110265	7.32889	MYO5C	55930
238199_x_at	-1.95616	-0.707839	-10.1568	2.84026e-07	0.0011137	7.31098
223124_s_at	0.771774	0.101896	10.1167	2.96546e-07	0.00113357	7.26947	PITHD1	57095
242963_at	1.36202	0.182619	10.1088	2.9911e-07	0.00113357	7.26119	SGMS2	166929
228039_at	-0.869678	-0.2961	-10.0873	3.06125e-07	0.00113357	7.23887	DDX46	9879
211208_s_at	-0.707412	-0.0576201	-10.0852	3.06796e-07	0.00113357	7.23676	CASK	8573
217974_at	-0.840524	-0.236958	-10.0846	3.07019e-07	0.00113357	7.23606	TM7SF3	51768
219938_s_at	-1.1187	-0.159262	-10.0808	3.0828e-07	0.00113357	7.23211	PSTPIP2	9050
229514_at	0.784976	0.0744248	10.0795	3.08701e-07	0.00113357	7.2308	GPATCH2L	55668
209546_s_at	-0.919765	-0.0886814	-10.0785	3.09031e-07	0.00113357	7.22977	APOL1	8542
220009_at	1.34886	0.49556	10.0548	3.17066e-07	0.00115374	7.20504	LONRF3	79836
201324_at	1.19944	0.0944264	10.0336	3.24449e-07	0.00117123	7.18287	EMP1	2012
36566_at	1.40854	0.55213	10.0242	3.27761e-07	0.00117311	7.17307	CTNS	1497
225198_at	-0.779403	-0.28652	-10.0176	3.30128e-07	0.00117311	7.16614	VAPA	9218
1569582_at	1.52955	0.398841	9.99785	3.37281e-07	0.00118289	7.14547	AADACP1	201651
1552575_a_at	0.863994	0.250605	9.99568	3.3808e-07	0.00118289	7.14319	C6orf141	135398
1557609_s_at	1.15243	0.270553	9.96525	3.49474e-07	0.00121342	7.11122	TBC1D12	23232
202083_s_at	1.1477	0.522626	9.9452	3.57203e-07	0.00122636	7.0901	SEC14L1	6397
223825_at	0.851693	0.320222	9.94165	3.58594e-07	0.00122636	7.08635	RIC1	57589
216804_s_at	1.00905	-0.0127285	9.92804	3.63971e-07	0.00123546	7.07199	PDLIM5	10611
204181_s_at	0.743982	0.264709	9.88473	3.8166e-07	0.00126987	7.02615	ZBTB43	23099
226805_at	-0.786977	-0.13938	-9.87705	3.84892e-07	0.00126987	7.01801	FITM2	128486
205830_at	-0.852803	-0.0792458	-9.87172	3.87152e-07	0.00126987	7.01235	CLGN	1047
1555758_a_at	-1.07402	-0.498175	-9.87126	3.87347e-07	0.00126987	7.01186	CDKN3	1033
206271_at	-1.21533	-0.262122	-9.86957	3.88067e-07	0.00126987	7.01007	TLR3	7098
215977_x_at	1.44572	0.221193	9.86271	3.91005e-07	0.00127034	7.00278	GK,	2710
220740_s_at	1.06846	0.223361	9.80471	4.16818e-07	0.0013446	6.94096	SLC12A6	9990
1560446_at	0.859418	0.165695	9.77559	4.30465e-07	0.00137885	6.90979
209970_x_at	-1.06067	-0.048785	-9.7613	4.37335e-07	0.00138132	6.89447	CASP1	834
217657_at	1.17045	0.310587	9.75923	4.38339e-07	0.00138132	6.89225	WBP1LP2
1564064_a_at	0.753622	0.239167	9.75383	4.40971e-07	0.00138132	6.88645	ATP11B	23200
226267_at	-0.886653	-0.0275392	-9.74892	4.43383e-07	0.00138132	6.88117	JDP2	122953
205352_at	1.04883	0.437586	9.73248	4.51551e-07	0.00139719	6.86349	SERPINI1	5274
209846_s_at	-1.10498	-0.102103	-9.72045	4.57632e-07	0.00140644	6.85053	BTN3A2	11118
205873_at	1.04889	0.241806	9.69343	4.71613e-07	0.00142536	6.82138	PIGL	9487
235453_at	0.941963	0.0232686	9.69185	4.72443e-07	0.00142536	6.81967	TOR1AIP2	163590
229275_at	0.993734	0.283295	9.69044	4.73188e-07	0.00142536	6.81815	IGFN1	91156
225750_at	-0.835769	-0.444648	-9.67136	4.83368e-07	0.00144205	6.79751	ERO1A	30001
230031_at	-0.950591	-0.439309	-9.66821	4.85072e-07	0.00144205	6.7941	HSPA5	3309
201233_at	0.788245	0.0853549	9.59493	5.26587e-07	0.00155531	6.71444	PSMD13	5719
206884_s_at	-1.42681	-0.651004	-9.58498	5.32507e-07	0.00155896	6.70359	SCEL	8796
223013_at	-0.717858	-0.0860697	-9.58137	5.34677e-07	0.00155896	6.69964	TBL1XR1	79718
227176_at	-0.905574	0.0688248	-9.55853	5.48607e-07	0.00158938	6.67467	SLC2A13	114134
225509_at	-1.08002	0.017292	-9.54274	5.58463e-07	0.0016077	6.65737	SAP30L	79685
222890_at	-1.04554	-0.272692	-9.5318	5.6541e-07	0.00161746	6.64536	CCDC113	29070
206011_at	-0.899628	0.158411	-9.52303	5.71037e-07	0.00161867	6.63574	CASP1	834
222787_s_at	-1.11245	-0.214777	-9.51857	5.73929e-07	0.00161867	6.63083	TMEM106B	54664
1552656_s_at	0.803285	0.0905961	9.50627	5.81972e-07	0.00161867	6.61731	UHMK1	127933
224698_at	-0.816513	-0.130584	-9.50581	5.82276e-07	0.00161867	6.6168	ESYT2	57488
203608_at	-1.44819	-0.528305	-9.50376	5.83626e-07	0.00161867	6.61455	ALDH5A1	7915
205698_s_at	-1.07752	-0.0191637	-9.48305	5.97485e-07	0.00164706	6.59173	MAP2K6	5608
219856_at	1.16227	0.175846	9.46776	6.07943e-07	0.00166579	6.57486	C1orf116	79098
1569156_at	1.49577	0.645325	9.45187	6.19027e-07	0.00168601	6.55729	ZNF846	162993
225959_s_at	-0.738936	-0.0919013	-9.44104	6.26699e-07	0.00168935	6.5453	ZNRF1	84937
219716_at	-1.15802	-0.349816	-9.43865	6.28404e-07	0.00168935	6.54266	APOL6	80830
225276_at	-0.889044	-0.15475	-9.43316	6.32348e-07	0.00168935	6.53657	GSPT1	2935
1554780_a_at	0.978803	0.36137	9.42933	6.3511e-07	0.00168935	6.53233	PHTF2	57157
227943_at	-1.1581	0.0393792	-9.37856	6.7301e-07	0.00177975	6.4759
228865_at	1.20608	0.331417	9.37068	6.79108e-07	0.00178234	6.46712	C1orf116	79098
225716_at	-0.683631	-0.491227	-9.36506	6.83496e-07	0.00178234	6.46085	BRI3BP	140707
234303_s_at	-1.5079	-0.0983914	-9.36219	6.85742e-07	0.00178234	6.45765	GPR85	54329
228575_at	-1.32223	-0.222652	-9.3522	6.93643e-07	0.00179263	6.44649	IL20RB	53833
225108_at	-1.0116	-0.535329	-9.30997	7.28119e-07	0.00186645	6.39922	AGPS	8540
219759_at	-0.99006	-0.241196	-9.30723	7.30415e-07	0.00186645	6.39615	ERAP2	64167
218442_at	0.751074	0.0947448	9.29563	7.40232e-07	0.00188097	6.38313	MROH7-TTC4, TTC4	7268
1567107_s_at	1.12467	-0.00269637	9.27581	7.57342e-07	0.00191376	6.36084	TPM4	7171
225415_at	-0.763484	-0.135845	-9.26574	7.66202e-07	0.00192545	6.3495	DTX3L	151636
211366_x_at	-1.06215	-0.0590438	-9.25833	7.72789e-07	0.00193133	6.34115	CASP1	834
212481_s_at	1.0313	-0.023131	9.25277	7.77771e-07	0.00193218	6.33488	TPM4,	7171
212097_at	-0.741245	-0.333914	-9.2485	7.81626e-07	0.00193218	6.33005	CAV1	857
241815_at	1.04014	0.224386	9.22977	7.98752e-07	0.00195381	6.3089	ZNF431	170959
204646_at	-1.0242	-0.00573185	-9.22954	7.98968e-07	0.00195381	6.30864	DPYD	1806
205590_at	-0.896517	-0.0350367	-9.22294	8.051e-07	0.00195828	6.30117	RASGRP1	10125
230123_at	0.986705	0.299094	9.21529	8.12267e-07	0.0019651	6.29252	NECAP2	55707
203845_at	0.988215	0.277255	9.20806	8.19108e-07	0.0019651	6.28433	KAT2B	8850
1552648_a_at	0.87247	-0.0571413	9.20622	8.20863e-07	0.0019651	6.28224	TNFRSF10A	8797
225827_at	0.835927	0.107338	9.18659	8.39798e-07	0.00199916	6.25997	AGO2	27161
219774_at	0.928952	0.211395	9.18241	8.43883e-07	0.00199916	6.25523	CCDC93	54520
236302_at	-0.825658	0.195773	-9.16187	8.64306e-07	0.00203693	6.23187	PPM1E	22843
204759_at	0.776555	0.178387	9.13635	8.90408e-07	0.00208763	6.2028	RCBTB2	1102
213293_s_at	-2.36707	-0.587876	-9.112	9.16111e-07	0.00212974	6.17498	TRIM22	10346
1569253_at	0.864529	-0.0600026	9.11049	9.17731e-07	0.00212974	6.17325	INTS4	92105
218739_at	1.05584	0.156512	9.1043	9.24402e-07	0.00213433	6.16617	ABHD5	51099
240261_at	0.803339	0.265003	9.09801	9.31236e-07	0.00213746	6.15897	TOM1L1	10040
207347_at	0.876553	0.340053	9.09442	9.35158e-07	0.00213746	6.15486	ERCC6	2074
207156_at	-1.21154	0.015885	-9.07214	9.59913e-07	0.00218308	6.1293	HIST1H2AG	8969
235670_at	0.890693	0.276641	9.04966	9.85612e-07	0.00222536	6.10345
202241_at	1.67608	0.66577	9.04735	9.88293e-07	0.00222536	6.10079	TRIB1	10221
1564063_a_at	0.9064	0.0584632	8.99836	1.04703e-06	0.00234467	6.04426	ATP11B	23200
224617_at	-0.702588	-0.251767	-8.99469	1.05159e-06	0.00234467	6.04001	PTBP3	9991
220012_at	0.768943	0.500183	8.96848	1.08469e-06	0.00240669	6.00965	ERO1B	56605
220620_at	1.46964	0.279484	8.96073	1.0947e-06	0.00241711	6.00065	CRCT1	54544
217730_at	0.737735	0.248237	8.94388	1.11679e-06	0.00245397	5.98107	TMBIM1	64114, 102465256
220248_x_at	0.649359	0.191762	8.93941	1.12272e-06	0.00245514	5.97588	NSFL1C	55968
1553992_s_at	-0.658946	-0.0170697	-8.9247	1.14251e-06	0.00247147	5.95875	NBR2	10230
1554364_at	1.11546	0.148809	8.92413	1.14329e-06	0.00247147	5.95808	PPP2R5C	5527
202270_at	-0.97598	-0.3054	-8.92073	1.14791e-06	0.00247147	5.95413	GBP1	2633
1554216_at	1.05128	0.204497	8.9178	1.15193e-06	0.00247147	5.9507	VPS50	55610
223527_s_at	0.942819	0.197749	8.9015	1.17449e-06	0.00250805	5.93168	CDADC1	81602
201009_s_at	-1.99645	-0.617505	-8.89494	1.1837e-06	0.0025159	5.92402	TXNIP	10628
227117_at	-0.8779	-0.200746	-8.89028	1.19029e-06	0.00251814	5.91858	XPOT	11260
226970_at	0.659534	0.188542	8.8848	1.1981e-06	0.00252166	5.91216	FBXO33	254170
210827_s_at	-1.51504	-0.0151685	-8.88135	1.20304e-06	0.00252166	5.90813	ELF3,	1999
202461_at	0.639409	0.199787	8.87286	1.21528e-06	0.00253564	5.89819	EIF2B2	8892
219952_s_at	0.889061	0.344083	8.86874	1.22128e-06	0.00253651	5.89336	MCOLN1	57192
209064_x_at	-0.919666	-0.332507	-8.84651	1.25417e-06	0.00259298	5.86729	PAIP1,	10605
203665_at	1.96353	0.931548	8.84138	1.26188e-06	0.00259465	5.86127	HMOX1	3162
1569241_a_at	1.30694	0.1421	8.83829	1.26656e-06	0.00259465	5.85763	ZNF93	81931
218644_at	1.25465	0.180919	8.83447	1.27237e-06	0.00259465	5.85314	PLEK2	26499
210559_s_at	-0.905957	-0.564405	-8.82975	1.27958e-06	0.00259465	5.84759	CDK1	983
1559672_a_at	-1.07046	-0.231592	-8.8272	1.28349e-06	0.00259465	5.84459	CCDC171	203238
215034_s_at	1.75129	0.147867	8.80379	1.32005e-06	0.00265673	5.81702	TM4SF1	4071
240771_at	-0.878062	-0.11656	-8.7915	1.33969e-06	0.00267503	5.80251	C1orf101	257044
225914_s_at	0.996345	0.266991	8.78852	1.3445e-06	0.00267503	5.79899	CAB39L	81617
228264_at	-0.759868	-0.0930864	-8.78711	1.34678e-06	0.00267503	5.79733	ACCS	84680
206751_s_at	0.959514	0.134681	8.77505	1.36645e-06	0.00269287	5.78308	PCYT1B	9468
205687_at	0.699654	0.33773	8.7739	1.36836e-06	0.00269287	5.78171	UBFD1	56061
213124_at	0.870203	0.115233	8.77077	1.37353e-06	0.00269287	5.77801	ZNF473	25888
239825_at	1.4335	0.665709	8.73755	1.42965e-06	0.00279088	5.73865
212614_at	0.879093	0.418509	8.71549	1.46829e-06	0.00285406	5.71243	ARID5B	84159
239302_s_at	-1.33704	-0.48115	-8.6976	1.50044e-06	0.00289184	5.69113
230100_x_at	-1.03399	-0.419142	-8.68502	1.52351e-06	0.00291992	5.67613	PAK1	5058
209770_at	-0.768678	0.0263006	-8.68227	1.5286e-06	0.00291992	5.67285	BTN3A1	11119
200887_s_at	-0.880145	-0.297405	-8.67921	1.53427e-06	0.00291992	5.6692	STAT1	6772
204793_at	-0.809984	-0.244218	-8.65799	1.57434e-06	0.00295187	5.64384	GPRASP1	9737
241312_at	-1.17197	-0.423248	-8.65659	1.57702e-06	0.00295187	5.64216	LINC00911	100996280
202042_at	0.609077	0.0784432	8.6457	1.59805e-06	0.00296682	5.62913	HARS	3035
204171_at	0.773161	0.0841022	8.63784	1.61342e-06	0.00297885	5.61971	RPS6KB1	6198
241371_at	0.905497	0.104241	8.6345	1.62001e-06	0.00297885	5.61569	TNFRSF10A	8797
206504_at	-0.777951	-0.302244	-8.63239	1.62418e-06	0.00297885	5.61316	CYP24A1	1591
208051_s_at	-1.00961	-0.33488	-8.62383	1.64122e-06	0.00299801	5.60289	PAIP1	10605
202014_at	0.945889	0.309024	8.61193	1.6652e-06	0.00302966	5.5886	PPP1R15A	23645
212361_s_at	-0.9307	-0.368364	-8.6004	1.68883e-06	0.00305762	5.57473	ATP2A2	488
229011_at	0.714543	0.263148	8.59789	1.69402e-06	0.00305762	5.57171	EMP1	2012
201660_at	-0.723577	-0.176066	-8.59081	1.70875e-06	0.00307202	5.56318	ACSL3	2181
231907_at	0.930605	0.126908	8.58076	1.72987e-06	0.00307526	5.55108	ABL2	27
1560814_a_at	1.06119	0.44392	8.57764	1.7365e-06	0.00307526	5.54731	C15orf57	90416
235456_at	-0.967383	0.571156	-8.57725	1.73733e-06	0.00307526	5.54684
202509_s_at	-1.0845	-0.215782	-8.56127	1.77167e-06	0.00311468	5.52756	TNFAIP2	7127
223709_s_at	-1.40991	0.050409	-8.55919	1.77619e-06	0.00311468	5.52505	WNT10A	80326
201491_at	0.711306	0.150225	8.55364	1.78834e-06	0.00311468	5.51833	AHSA1	10598
239648_at	0.89908	0.164855	8.55254	1.79074e-06	0.00311468	5.51701	DCUN1D3	123879
1557055_s_at	0.678674	0.00401447	8.5462	1.80473e-06	0.00311468	5.50934	LINC01128	643837
214960_at	0.854796	-0.0347867	8.54203	1.814e-06	0.00311468	5.50429	API5	8539
201084_s_at	-0.730902	-0.287677	-8.54174	1.81465e-06	0.00311468	5.50394	BCLAF1	9774
213762_x_at	-0.866053	-0.379148	-8.52292	1.85712e-06	0.00315564	5.48114	RBMX, , RBMXP2	27316
221577_x_at	-1.3345	0.736524	-8.49387	1.92477e-06	0.00321457	5.44585	GDF15	9518
215672_s_at	0.940096	0.429365	8.48594	1.94369e-06	0.00322658	5.43621	AHCYL2	23382
227291_s_at	-0.664744	-0.368741	-8.48094	1.95571e-06	0.00323474	5.43012	BOLA3	388962
204469_at	1.32941	-0.0842838	8.47572	1.96835e-06	0.00323485	5.42377	PTPRZ1	5803
238719_at	-0.725113	-0.264191	-8.47504	1.97e-06	0.00323485	5.42294	PPP2CA	5515
213294_at	-0.623647	-0.242541	-8.44018	2.05682e-06	0.00334122	5.38039	EIF2AK2	5610
222810_s_at	0.623054	-0.0227865	8.41883	2.11201e-06	0.00339896	5.35426	RASAL2	9462
227462_at	-0.873392	-0.188961	-8.41777	2.11478e-06	0.00339896	5.35296	ERAP2	64167
203242_s_at	1.07703	-0.0244574	8.41105	2.1325e-06	0.00341537	5.34472	PDLIM5	10611
215286_s_at	1.10029	0.404266	8.40662	2.14427e-06	0.00342217	5.33929	PHTF2	57157
236585_at	0.757116	0.00892443	8.39326	2.18019e-06	0.00346732	5.32289
219210_s_at	0.649633	0.0544804	8.37888	2.21956e-06	0.0034933	5.30521	RAB8B	51762
211925_s_at	-0.87084	-0.181897	-8.37049	2.24291e-06	0.00351787	5.29488	PLCB1	23236
203068_at	0.990457	0.463169	8.34508	2.31515e-06	0.00358804	5.26356	KLHL21	9903
222812_s_at	1.20256	0.538201	8.34368	2.3192e-06	0.00358804	5.26183	RHOF	54509
224484_s_at	0.739684	0.00586018	8.33775	2.33645e-06	0.00360248	5.25451	BRMS1L	84312
207231_at	-1.0047	-0.510484	-8.33209	2.35305e-06	0.00361582	5.24751	DZIP3	9666
240126_x_at	1.12425	0.441758	8.31884	2.3924e-06	0.0036639	5.23112
228080_at	0.863752	0.473493	8.30549	2.43274e-06	0.00371318	5.21459	LAYN	143903
209824_s_at	0.720868	0.352054	8.28834	2.48565e-06	0.0037321	5.19332	ARNTL	406
219991_at	-0.948901	-0.00346993	-8.28759	2.48799e-06	0.0037321	5.19239	SLC2A9	56606
224492_s_at	0.741776	0.00428315	8.28741	2.48856e-06	0.0037321	5.19216	ZNF627	199692
220673_s_at	1.33929	0.51122	8.25323	2.59783e-06	0.00385283	5.14966	PPP4R4	57718
204985_s_at	-1.20356	-0.0703113	-8.23883	2.6454e-06	0.00390667	5.13171	TRAPPC6A	79090
38241_at	-1.3712	-0.208637	-8.21474	2.72707e-06	0.00398016	5.10162	BTN3A3	10384
46167_at	0.758332	0.0716509	8.21441	2.7282e-06	0.00398016	5.10121	MROH7-TTC4, TTC4	7268
228411_at	-1.01473	-0.148215	-8.21404	2.72949e-06	0.00398016	5.10074	PARD3B	117583
220672_at	1.09368	0.411065	8.21385	2.73016e-06	0.00398016	5.1005	PPP4R4	57718
232530_at	-1.23321	0.0524808	-8.20903	2.74684e-06	0.00399168	5.09447	PLD1	5337
228923_at	0.834436	0.449448	8.20132	2.77374e-06	0.00401389	5.08482	S100A6	6277
228959_at	-0.744273	-0.162722	-8.19416	2.799e-06	0.00401449	5.07585
212442_s_at	-0.714377	-0.317678	-8.192	2.80667e-06	0.00401449	5.07314	CERS6	253782
244829_at	-0.674538	0.376306	-8.18305	2.83866e-06	0.00404753	5.06192	LINC00518
224797_at	1.04158	-0.208557	8.17601	2.86411e-06	0.00405237	5.05308	ARRDC3	57561
226478_at	-0.681799	-0.280095	-8.16407	2.90779e-06	0.00408211	5.03809
226169_at	-0.75154	-0.0818849	-8.15348	2.94716e-06	0.00410561	5.02477	SBF2	81846
206636_at	0.691157	0.109277	8.14934	2.96272e-06	0.00410561	5.01955	RASA2	5922
212980_at	-1.00577	-0.46449	-8.14862	2.96541e-06	0.00410561	5.01865	AHSA2	130872
211822_s_at	0.730844	0.268134	8.1475	2.96966e-06	0.00410561	5.01724	NLRP1	22861
239010_at	1.10425	0.615152	8.13016	3.03589e-06	0.00413434	4.99539
227689_at	0.733912	0.365203	8.11939	3.0778e-06	0.00415657	4.9818	ZNF227	7770
226860_at	-0.798479	-0.404618	-8.10874	3.11987e-06	0.00418401	4.96835	TMEM19	55266
223742_at	0.758239	0.0868564	8.10686	3.12735e-06	0.00418401	4.96597	MRPL4	51073
239348_at	-0.708918	-0.403056	-8.09845	3.16112e-06	0.00418401	4.95533
219207_at	0.683233	-0.00336644	8.09311	3.18275e-06	0.00418401	4.94857	EDC3	80153
221696_s_at	0.618767	0.0262696	8.04767	3.3733e-06	0.00435892	4.89092	STYK1	55359
1557275_a_at	-1.1273	-0.0169077	-8.03761	3.4171e-06	0.00439057	4.87812	TLCD2	727910
231775_at	0.897445	0.0641245	8.03147	3.44415e-06	0.00440047	4.8703	TNFRSF10A	8797
201898_s_at	0.583163	0.0190644	8.02044	3.49333e-06	0.00443836	4.85624	UBE2A	7319
204193_at	0.627273	0.290573	8.01546	3.51575e-06	0.00444548	4.84989	CHKB-CPT1B, CHKB	1120
1553338_at	0.875689	0.111424	8.01486	3.51848e-06	0.00444548	4.84912	SDE2	163859
236042_at	-0.748555	-0.284176	-8.00409	3.56754e-06	0.00447022	4.83538
228885_at	-1.1046	-0.0180445	-7.9999	3.58684e-06	0.00448205	4.83003	MAMDC2	256691
201490_s_at	0.830435	0.0224795	7.98881	3.63848e-06	0.00452173	4.81584	PPIF	10105
224428_s_at	-0.961237	-0.823346	-7.98064	3.67701e-06	0.00454553	4.80539	CDCA7	83879
215359_x_at	0.764434	-0.00247198	7.97749	3.69198e-06	0.00454553	4.80135	ZNF44	51710
226134_s_at	-0.788517	-0.305266	-7.97631	3.69759e-06	0.00454553	4.79985	MSI2	124540
211367_s_at	-0.989475	-0.0242113	-7.9734	3.71149e-06	0.00455032	4.79612	CASP1	834
225710_at	-0.641889	-0.558725	-7.96784	3.73825e-06	0.0045708	4.78899	GNB4	59345
235753_at	-0.705048	-0.120836	-7.95427	3.80438e-06	0.00462678	4.77158	HOXA7	3204
203065_s_at	-0.710027	-0.369683	-7.94559	3.84731e-06	0.00464928	4.76044	CAV1	857
227696_at	-1.00265	-0.0942727	-7.93031	3.92422e-06	0.00467883	4.74078	EXOSC6	118460
242028_at	0.93037	0.220455	7.92927	3.92947e-06	0.00467883	4.73946	ZNF709,	163051
225332_at	-0.611122	-0.108934	-7.91751	3.98984e-06	0.00471038	4.72431	OIP5-AS1
239468_at	-0.925259	-0.0459512	-7.91603	3.99753e-06	0.00471038	4.7224	MKX	283078
208934_s_at	0.900767	0.031963	7.91211	4.01789e-06	0.00471038	4.71736	LGALS8	3964
218581_at	0.869139	0.534469	7.91037	4.02698e-06	0.00471038	4.71511	ABHD4	63874
225520_at	-0.606857	-0.327308	-7.90768	4.04106e-06	0.004713	4.71164	MTHFD1L	25902
225093_at	-0.874264	-0.15918	-7.89601	4.1028e-06	0.00477277	4.69658	UTRN	7402
210987_x_at	-0.563975	-0.32654	-7.88966	4.13679e-06	0.00480004	4.68838	TPM1	7168
212551_at	-0.669886	-0.330634	-7.88153	4.18077e-06	0.00483872	4.67787	CAP2	10486
212554_at	-0.635164	-0.322538	-7.87099	4.23857e-06	0.00489317	4.66423	CAP2	10486
225075_at	0.792886	0.0630504	7.85543	4.32539e-06	0.00493786	4.64408	PDRG1	81572
206907_at	0.784277	0.602719	7.85509	4.3273e-06	0.00493786	4.64364	TNFSF9	8744
202195_s_at	0.662916	0.250828	7.85434	4.33156e-06	0.00493786	4.64266	TMED5	50999
216944_s_at	1.02579	0.420311	7.84501	4.38462e-06	0.00497341	4.63056	ITPR1	3708
202780_at	-0.94502	-0.602744	-7.82346	4.50984e-06	0.00507746	4.60256	OXCT1	5019
226886_at	-0.926389	-0.135791	-7.81137	4.58175e-06	0.00513301	4.58683	GFPT1	2673
1558626_at	-1.04592	-0.0356576	-7.80934	4.59396e-06	0.00513404	4.58418
229991_s_at	-0.649281	-0.123214	-7.78474	4.74452e-06	0.00527637	4.55211
218593_at	0.540961	0.0134603	7.77671	4.79484e-06	0.00528976	4.54161	RBM28	55131
242837_at	-0.857503	-0.42355	-7.73531	5.06326e-06	0.00548337	4.48741
1555785_a_at	0.719939	0.0327432	7.67136	5.50997e-06	0.0058307	4.40322	XRN1	54464
201798_s_at	-0.644813	-0.0644868	-7.66869	5.52953e-06	0.0058307	4.39969	MYOF	26509
207528_s_at	1.54526	0.927738	7.66582	5.55063e-06	0.0058307	4.3959	SLC7A11	23657
227606_s_at	0.561655	-0.00803235	7.65904	5.60084e-06	0.00585639	4.38693	STAMBPL1	57559
201129_at	-0.839457	-0.443143	-7.65514	5.62988e-06	0.00585982	4.38178	SRSF7	6432
33494_at	0.606356	0.450776	7.64024	5.74241e-06	0.00594972	4.36206	ETFDH	2110
224935_at	-0.546483	-0.286846	-7.62271	5.87793e-06	0.00606251	4.33882	EIF2S3	1968
219067_s_at	-0.542919	-0.273369	-7.61962	5.90222e-06	0.00607379	4.33471	NSMCE4A	54780
206417_at	0.7802	0.369008	7.6085	5.99033e-06	0.0061229	4.31994	CNGA1	1259
1554785_at	0.708726	0.0302715	7.60119	6.04906e-06	0.00615527	4.31021	CCDC82	79780
205530_at	0.675719	0.485282	7.59595	6.09147e-06	0.00615764	4.30325	ETFDH	2110
207723_s_at	-1.15612	0.0679872	-7.59413	6.10626e-06	0.00615837	4.30083	KLRC3,	3823
230405_at	-0.778341	-0.0552757	-7.58252	6.20174e-06	0.00621333	4.28536	C5orf56
224970_at	-0.809761	-0.109615	-7.57917	6.22956e-06	0.00622748	4.2809	NFIA	4774
225348_at	-0.662507	-0.557293	-7.57202	6.28945e-06	0.00626868	4.27136	SRSF10	10772
1554594_at	0.936572	-0.208323	7.57096	6.29834e-06	0.00626868	4.26995	ARHGAP27	201176
225113_at	-0.658985	-0.298751	-7.55831	6.4059e-06	0.00633416	4.25307	AGPS	8540
57703_at	0.717039	0.072003	7.52687	6.6818e-06	0.00649403	4.21101	SENP5	205564
219353_at	-0.781889	-0.446244	-7.51337	6.80412e-06	0.00658478	4.19291	NHLRC2	374354
244025_at	0.757235	0.340145	7.49139	7.00849e-06	0.00669876	4.16338	ITPRIP	85450
204182_s_at	0.597131	0.253526	7.4912	7.01027e-06	0.00669876	4.16313	ZBTB43	23099
205921_s_at	0.646277	0.337126	7.48734	7.04689e-06	0.00671964	4.15793	SLC6A6	6533
1552546_a_at	1.33281	-0.20157	7.48	7.11694e-06	0.00674402	4.14806	LETM2	137994
220651_s_at	0.778265	-0.223047	7.46993	7.21436e-06	0.0067856	4.13449	MCM10	55388
229566_at	-0.959539	0.202936	-7.46126	7.29926e-06	0.0067856	4.12281	WFDC21P
201456_s_at	-0.594524	-0.320991	-7.45065	7.40477e-06	0.00681791	4.10848	BUB3	9184
201014_s_at	-0.594946	-0.420475	-7.41797	7.73991e-06	0.0070303	4.06428	PAICS, PAICSP4	10606
203212_s_at	-0.558837	-0.331962	-7.4132	7.79015e-06	0.00704441	4.05782	MTMR2	8898
223302_s_at	0.572567	0.00974151	7.3879	8.06249e-06	0.00718858	4.02349	ZNF655	79027
225274_at	-0.538717	0.0500508	-7.38346	8.1114e-06	0.00719192	4.01745	PCYOX1	51449
228289_at	-0.713455	-0.359294	-7.3562	8.41824e-06	0.00740623	3.98035	BRD7	29117
225060_at	-0.577508	0.0368287	-7.35089	8.4795e-06	0.00743253	3.97311	LRP11	84918
225574_at	-0.52872	-0.280898	-7.3413	8.59124e-06	0.00745594	3.96002	RWDD4	201965
221428_s_at	-0.709827	-0.110303	-7.32658	8.76579e-06	0.00749456	3.93992	TBL1XR1,	79718
204671_s_at	-0.894628	-0.434471	-7.30709	9.00289e-06	0.00765411	3.91324	ANKRD6	22881
231897_at	0.708417	0.504871	7.28895	9.22964e-06	0.00780314	3.88837	, PTGR1	22949
229517_at	-0.733814	-0.0901081	-7.28718	9.25198e-06	0.00780751	3.88595	PTPDC1	138639
229790_at	0.643978	0.00357913	7.26578	9.52814e-06	0.00793337	3.85653	TERF2	7014
226810_at	-0.706221	-0.330968	-7.23754	9.90592e-06	0.00816248	3.81764	OGFRL1	79627
1568733_at	0.777591	0.2922	7.23577	9.93004e-06	0.00816756	3.8152	C10orf76	79591
209875_s_at	1.46665	1.0883	7.22198	1.01209e-05	0.00824182	3.79616	SPP1	6696
212148_at	-1.28999	-0.045067	-7.2214	1.0129e-05	0.00824182	3.79535	PBX1	5087
226419_s_at	-0.593888	-0.303973	-7.19788	1.04637e-05	0.00843862	3.76283
222941_at	-0.856437	-0.265064	-7.19392	1.05212e-05	0.00846999	3.75734	USP46	64854
236691_at	-0.622055	-0.463308	-7.16653	1.09282e-05	0.00874352	3.71935
230492_s_at	0.739717	-0.448727	7.1659	1.09379e-05	0.00874352	3.71846	, GPCPD1	56261
201649_at	-0.576275	0.0341201	-7.16106	1.10116e-05	0.008787	3.71174	UBE2L6	9246
1563272_at	0.703051	0.298783	7.15745	1.10669e-05	0.00879422	3.70672	TBC1D8B	54885
223254_s_at	-0.618491	-0.415235	-7.15543	1.10979e-05	0.00879422	3.70391	G2E3	55632
207485_x_at	-0.651699	-0.124074	-7.14867	1.12027e-05	0.00884256	3.6945	BTN3A1	11119
223682_s_at	0.745182	0.114324	7.13812	1.13682e-05	0.00891184	3.67982	EIF1AD	84285
230815_at	0.506765	0.336783	7.1311	1.14799e-05	0.00894854	3.67003	, KIF27	55582
228141_at	-0.590322	-0.22823	-7.1305	1.14894e-05	0.00894854	3.6692	GPX8	493869
233713_at	-0.668913	-0.280211	-7.12529	1.15732e-05	0.00897083	3.66193
218126_at	0.567482	0.0145182	7.1009	1.19734e-05	0.00913771	3.62787	RMDN3	55177
226440_at	0.559222	0.355165	7.07403	1.24316e-05	0.00933317	3.59025	DUSP22	56940
227541_at	0.59754	-0.0525387	7.05774	1.27185e-05	0.00948239	3.56739	WDR20	91833
204589_at	-0.770463	0.0149992	-7.05484	1.27703e-05	0.00948571	3.56332	NUAK1	9891
225329_at	-0.568522	-0.324985	-7.0466	1.29187e-05	0.00957009	3.55174	MCRIP1	348262
205015_s_at	1.07099	-0.194511	7.01707	1.34659e-05	0.00981559	3.51015	TGFA	7039
221232_s_at	-0.8026	-0.111397	-7.01388	1.35264e-05	0.00984396	3.50566	ANKRD2	26287
213206_at	0.782483	0.364945	7.00853	1.36287e-05	0.00989479	3.4981
1558322_a_at	1.22308	0.697807	7.00251	1.37447e-05	0.00989479	3.48961	PAQR9	344838
203171_s_at	0.561897	-0.0147221	6.99254	1.39392e-05	0.0100002	3.47552	RRP8	23378
229864_at	0.663482	-0.0806686	6.99143	1.3961e-05	0.0100002	3.47395	ELP6	54859
239536_at	1.12271	0.499495	6.98988	1.39916e-05	0.0100063	3.47176	C1orf56	54964
208920_at	-0.725465	-0.461239	-6.98096	1.41688e-05	0.0100855	3.45914	SRI	6717
224701_at	-0.638081	-0.0638722	-6.96854	1.44195e-05	0.0102001	3.44155	PARP14	54625
220334_at	0.686658	0.464216	6.95047	1.47926e-05	0.0104107	3.41592	RGS17	26575
203710_at	0.697756	0.4249	6.94752	1.48544e-05	0.0104107	3.41174	ITPR1	3708
236777_at	0.545915	0.393216	6.9433	1.49436e-05	0.010441	3.40574
238383_at	-0.920084	-0.649376	-6.93748	1.50673e-05	0.0105113	3.39747	C6orf58	352999
208319_s_at	-0.629483	-0.60857	-6.91518	1.55513e-05	0.0107828	3.36575	RBM3	5935
236423_at	0.72178	0.392603	6.89587	1.59839e-05	0.0110155	3.33822
227991_x_at	0.619438	0.231533	6.88687	1.619e-05	0.0110904	3.32536	ZBTB43	23099
209755_at	-1.03229	-0.156905	-6.87981	1.63536e-05	0.0111409	3.31527	NMNAT2	23057
201458_s_at	-0.579922	-0.3126	-6.87946	1.63618e-05	0.0111409	3.31477	BUB3	9184
210587_at	-1.45649	0.0851707	-6.86586	1.66818e-05	0.0113349	3.29532	INHBE	83729
236380_at	0.681274	-0.0217971	6.84935	1.70796e-05	0.0115091	3.27167	RPP14	11102
243918_at	0.977346	0.74908	6.83663	1.73929e-05	0.0115979	3.25342	KLHL24	54800
216918_s_at	-0.642082	-0.159504	-6.83086	1.7537e-05	0.0116618	3.24513	DST	667
205437_at	0.544862	0.32	6.82857	1.75946e-05	0.0116801	3.24184	ZNF211	10520
213097_s_at	0.529655	-0.00341974	6.82449	1.76977e-05	0.0117002	3.23598	DNAJC2	27000
206785_s_at	-1.34409	0.184218	-6.82236	1.77519e-05	0.011719	3.23291	KLRC1, KLRC2	3821, 3822
209653_at	0.683207	-0.0946704	6.81494	1.79414e-05	0.011827	3.22224	, KPNA4	3840
223839_s_at	-0.80186	0.092309	-6.81294	1.79929e-05	0.0118438	3.21936
212037_at	-0.604632	-0.349112	-6.79946	1.83442e-05	0.0119882	3.19995	PNN	5411
218677_at	0.845205	0.595592	6.78542	1.87176e-05	0.0121624	3.17971	S100A14	57402
200987_x_at	0.474339	-0.132646	6.73689	2.00723e-05	0.0127869	3.10951	PSME3	10197
203214_x_at	-0.809854	-0.560327	-6.70938	2.08862e-05	0.013075	3.06957	CDK1	983
238825_at	0.78846	-0.0148002	6.7085	2.09126e-05	0.013075	3.0683	ACRC	93953
228742_at	0.612349	0.466986	6.70663	2.09693e-05	0.013075	3.06557
1557779_at	-1.14422	0.00272764	-6.70613	2.09844e-05	0.013075	3.06485	LINC01468	101928687
225747_at	0.680149	0.444259	6.7022	2.11043e-05	0.013127	3.05913	COQ10A	93058
205580_s_at	0.649721	-0.0979086	6.69921	2.11958e-05	0.0131526	3.05478	HRH1	3269
226636_at	-0.983896	0.0194428	-6.69445	2.13424e-05	0.0132076	3.04785	PLD1	5337
233085_s_at	0.673987	-0.0450893	6.65516	2.25948e-05	0.0137212	2.99053	NABP1	64859
242023_at	0.771735	0.415216	6.62351	2.366e-05	0.014123	2.94421	ABHD4	63874
201118_at	0.767719	0.487704	6.61505	2.39538e-05	0.0142051	2.9318	PGD	5226
202061_s_at	-0.624296	-0.0331286	-6.61292	2.40284e-05	0.0142195	2.92867	SEL1L	6400
202831_at	0.639455	0.707622	6.59348	2.47205e-05	0.0145015	2.90011	GPX2	2877
223898_at	0.634893	-0.0253515	6.54214	2.66522e-05	0.0153646	2.82442	ZNF670	93474
216548_x_at	-0.52844	-0.38759	-6.53755	2.68325e-05	0.0154295	2.81763	HMGB3P1
222962_s_at	0.673317	-0.13149	6.51159	2.78772e-05	0.0158536	2.77919	MCM10	55388
1553995_a_at	0.79911	-0.0621209	6.50875	2.7994e-05	0.0158964	2.77499	NT5E	4907
1554794_a_at	0.825933	-0.181611	6.47394	2.94694e-05	0.0164669	2.72329	UBE3C	9690
208937_s_at	-0.955046	0.423148	-6.44679	3.06774e-05	0.0168521	2.68284	ID1	3397
222016_s_at	-1.753	0.367442	-6.44511	3.07542e-05	0.0168691	2.68032	ZSCAN31	64288
231714_s_at	0.447476	-0.034356	6.42236	3.18095e-05	0.0172655	2.64635	AP4B1	10717
206034_at	0.703595	-0.146648	6.39865	3.2951e-05	0.0176951	2.61084	SERPINB8	5271
238431_at	-0.499801	-0.37882	-6.35526	3.51532e-05	0.0183035	2.54568	ARL5A	26225
213916_at	0.645026	0.00727647	6.35434	3.52014e-05	0.0183035	2.5443	ZNF625-ZNF20, ZNF20	7568
229287_at	-0.611056	0.132472	-6.35264	3.52911e-05	0.0183035	2.54173	PCNX1	22990
219882_at	0.558201	0.341192	6.35247	3.52999e-05	0.0183035	2.54148	TTLL7	79739
212527_at	0.493753	-0.0198225	6.34439	3.57289e-05	0.0184464	2.52931	DESI1	27351
202903_at	-0.551408	-0.372819	-6.34285	3.58114e-05	0.018468	2.52699	LSM5	23658
211572_s_at	0.610744	0.0025969	6.32096	3.70044e-05	0.0189329	2.49397	SLC23A2	9962
205566_at	0.823267	-0.0459421	6.31916	3.71045e-05	0.0189628	2.49125	ABHD2	11057
213075_at	-0.699219	0.28774	-6.31754	3.71946e-05	0.0189876	2.4888	OLFML2A	169611
210009_s_at	0.724148	-0.0482242	6.30268	3.80331e-05	0.0192857	2.46634	, GOSR2	9570
207855_s_at	0.534979	-0.0385849	6.29704	3.83566e-05	0.0193634	2.4578	CLCC1	23155
232752_at	-0.888197	-0.501028	-6.28983	3.87744e-05	0.0194878	2.44688	LOXL1-AS1	100287616
213664_at	-0.56918	0.112787	-6.2821	3.9228e-05	0.0196075	2.43516	SLC1A1	6505
202458_at	-0.780521	-0.0267566	-6.25098	4.11103e-05	0.0203029	2.38792	PRSS23	11098
1553994_at	0.904804	-0.0922772	6.2473	4.13393e-05	0.0203718	2.38232	NT5E	4907
206116_s_at	-0.518202	-0.342224	-6.24573	4.14371e-05	0.0203978	2.37994	TPM1	7168
218120_s_at	0.592876	-0.0380276	6.22855	4.25261e-05	0.0207292	2.35379	HMOX2	3163
1555882_at	-0.593815	0.00106237	-6.22265	4.29076e-05	0.0208732	2.34478	SPIN3	169981
212151_at	-0.678135	0.0362903	-6.21957	4.31076e-05	0.0209257	2.3401	PBX1	5087
228989_at	-0.657797	0.0530612	-6.2173	4.32557e-05	0.0209529	2.33664	TYMSOS
219257_s_at	0.716911	0.488117	6.1967	4.46268e-05	0.0213893	2.30517	SPHK1	8877
241908_at	0.548102	0.387542	6.18194	4.56369e-05	0.0217132	2.2826	BROX	148362
233011_at	0.628777	-0.222635	6.16844	4.65825e-05	0.0220249	2.26192
228824_s_at	0.648597	0.425229	6.16301	4.69681e-05	0.0220924	2.25361	, PTGR1	22949
201193_at	-0.804031	0.0798497	-6.14762	4.80814e-05	0.0224766	2.22998	IDH1	3417
203968_s_at	0.609399	-0.129053	6.13612	4.8931e-05	0.0228035	2.21231	CDC6	990
223255_at	-0.516361	-0.364111	-6.13449	4.90528e-05	0.0228368	2.20981	G2E3	55632
227471_at	-0.484375	0.00410725	-6.11211	5.07564e-05	0.0234259	2.17537	HACE1	57531
219895_at	-1.0223	0.0618948	-6.09982	5.17188e-05	0.0237379	2.15642	TMEM255A	55026
205796_at	0.582965	-0.105125	6.0825	5.31083e-05	0.0241724	2.12967	TCP11L1	55346
219409_at	0.49328	-0.0454327	6.08238	5.3118e-05	0.0241724	2.12949	SNIP1	79753
224826_at	0.617658	-0.159649	6.08145	5.31933e-05	0.0241724	2.12806	GPCPD1	56261
235956_at	-0.544333	0.0607745	-6.06988	5.41449e-05	0.024457	2.11017	CEP126	57562
227293_at	-0.49614	-0.351715	-6.06228	5.47802e-05	0.0246718	2.0984
1552658_a_at	1.38647	-0.035374	6.04188	5.65235e-05	0.0252055	2.06679	NAV3	89795
209368_at	-0.655369	0.0441616	-6.02513	5.79987e-05	0.0256123	2.04079	EPHX2	2053
225955_at	0.450334	0.259472	6.01545	5.88692e-05	0.0258961	2.02575	METRNL	284207
213626_at	-0.548466	-0.00892364	-6.00743	5.96015e-05	0.0261766	2.01327	CBR4	84869
229871_at	-0.504932	-0.340473	-6.00306	6.00052e-05	0.0262269	2.00646	SAMD4B	55095
207517_at	1.04088	-0.191151	5.99576	6.06846e-05	0.0263632	1.9951	LAMC2	3918
212173_at	-0.592167	-0.660407	-5.98101	6.20829e-05	0.0267916	1.9721	AK2	204
218875_s_at	-0.634448	-0.587349	-5.97613	6.25528e-05	0.026841	1.96449	FBXO5	26271
209853_s_at	0.457606	-0.151505	5.97371	6.27877e-05	0.0268916	1.96071	PSME3	10197
232184_at	0.714915	-0.116075	5.95089	6.50457e-05	0.0275218	1.92504	ALS2	57679
226622_at	-1.53344	0.127382	-5.93883	6.62739e-05	0.0277571	1.90616	LINC00969, MUC20	200958
223078_s_at	0.573097	-0.198911	5.91254	6.90359e-05	0.0281944	1.86494	TMOD3	29766
204337_at	0.456715	-0.113904	5.90809	6.95156e-05	0.0283071	1.85794	RGS4	5999
217403_s_at	0.539652	0.300363	5.9017	7.02098e-05	0.0284878	1.84791	ZNF227	7770
224280_s_at	0.44019	0.403031	5.87442	7.32597e-05	0.0291743	1.80497	MTFR1L	56181
235512_at	0.666967	-0.0988965	5.85417	7.56132e-05	0.0297	1.77304	CDKL1	8814
228783_at	0.529576	0.365279	5.83755	7.76059e-05	0.0302476	1.74677	BVES	11149
218295_s_at	0.594639	-0.0932003	5.83489	7.7929e-05	0.030324	1.74257	, NUP50	10762
202352_s_at	0.436158	-0.10462	5.81175	8.08078e-05	0.0310696	1.70594	PSMD12	5718
229869_at	-0.598182	0.0167744	-5.80596	8.15456e-05	0.0312476	1.69676
209355_s_at	-0.781147	0.164242	-5.79189	8.33686e-05	0.0317855	1.67443	PLPP3	8613
219334_s_at	0.77587	0.0129003	5.7746	8.56675e-05	0.0323367	1.64695	NABP1	64859
203919_at	-0.611741	0.0963891	-5.73125	9.17308e-05	0.0338055	1.57786	TCEA2	6919
204546_at	0.548939	0.43862	5.72409	9.27742e-05	0.0340034	1.56644	KIAA0513	9764
1553956_at	-0.508838	-0.321699	-5.71894	9.3534e-05	0.0341443	1.5582	TMEM237	65062
230240_at	0.774085	0.548028	5.71135	9.46646e-05	0.034364	1.54606
232105_at	0.780857	0.723142	5.70893	9.50281e-05	0.0344409	1.54219	BLACAT1
229759_s_at	-0.531344	-0.375316	-5.69892	9.65471e-05	0.0347562	1.52616	VEPH1	79674
224983_at	-0.466646	0.0768858	-5.68821	9.82005e-05	0.0351427	1.50901	SCARB2	950
1552738_a_at	0.58242	-0.13724	5.68172	9.92174e-05	0.0353693	1.4986	ST7L	54879
1557116_at	-0.663988	0.023122	-5.67386	0.000100463	0.0357553	1.48599	APOL6	80830
231810_at	-0.536287	-0.387141	-5.65414	0.000103664	0.0366081	1.4543	BRI3BP	140707
202619_s_at	-0.60329	-0.504365	-5.65069	0.000104234	0.0367525	1.44876	PLOD2	5352
214942_at	0.717337	-0.0530421	5.62565	0.000108477	0.0377541	1.40844	RBM34	23029
203612_at	0.489387	-0.0669491	5.6256	0.000108486	0.0377541	1.40835	BYSL	705
224966_s_at	0.424656	-0.0827947	5.61412	0.000110492	0.0382473	1.38984	DUS3L	56931
220495_s_at	0.442663	-0.0157574	5.59921	0.000113156	0.0387858	1.36576	TXNDC15	79770
225877_at	-0.506191	0.0765877	-5.59483	0.000113952	0.0389412	1.35868	TYSND1	219743
212096_s_at	-1.03602	0.178216	-5.58513	0.000115735	0.039409	1.34299	MTUS1	57509
207375_s_at	-0.500774	0.102432	-5.56958	0.000118654	0.0401517	1.31781	IL15RA	3601
201041_s_at	0.765892	0.343015	5.5604	0.000120413	0.0404503	1.30294	DUSP1	1843
238975_at	-0.583428	-0.0123534	-5.55662	0.000121147	0.0406369	1.29679	MMAB	326625
214959_s_at	0.591403	-0.106938	5.54435	0.000123558	0.041152	1.27687	API5P1, API5	8539
206814_at	0.668883	-0.0622812	5.54238	0.000123949	0.0412422	1.27368	NGF	4803
1553192_at	0.546889	-0.148085	5.53473	0.000125484	0.0416072	1.26124	ZNF441	126068
223459_s_at	0.589489	0.411321	5.53418	0.000125595	0.0416072	1.26035	C1orf56	54964
224629_at	-0.418096	0.037031	-5.51077	0.000130417	0.0424321	1.22227	LMAN1	3998
226281_at	-0.62174	0.358732	-5.49608	0.000133544	0.0432526	1.19832	DNER	92737
233168_s_at	0.53138	0.343431	5.46141	0.000141241	0.0446133	1.14168		83642
204748_at	1.0867	-0.286551	5.44464	0.000145128	0.0453063	1.11423	PTGS2	5743
223493_at	-0.680194	-0.48289	-5.42909	0.000148836	0.0458444	1.08873	FBXO4	26272
201870_at	0.460175	-0.104273	5.42172	0.000150626	0.046105	1.07665	TOMM34	10953
222455_s_at	-0.435619	-0.313035	-5.4195	0.000151171	0.0461883	1.073	PARVA	55742
219534_x_at	0.611957	0.400439	5.41945	0.000151183	0.0461883	1.07291	CDKN1C	1028
218156_s_at	0.55663	-0.159506	5.41206	0.000153011	0.0465841	1.06077	TSR1	55720
216594_x_at	1.16552	1.34704	5.41059	0.000153375	0.0466015	1.05836	AKR1C1, AKR1C2	1645, 1646
214866_at	0.646868	-0.0779551	5.38637	0.000159541	0.0478991	1.01852	PLAUR	5329
207338_s_at	0.547361	-0.0553935	5.38489	0.000159926	0.047983	1.01608	ZNF200	7752
1570153_at	-0.617045	-0.352058	-5.36693	0.00016468	0.048925	0.986473	CCDC169	728591
242916_at	-0.430354	-0.286165	-5.35806	0.00016708	0.0493789	0.971841	CNTRL	11064
228466_at	-0.523739	-0.340642	-5.35117	0.000168972	0.0496812	0.960457	GABPB2	126626
243931_at	0.465498	-0.200891	5.35061	0.000169127	0.0496945	0.959535
205203_at	-0.702584	0.0832818	-5.34147	0.000171672	0.0501506	0.944437	PLD1	5337
239086_at	-0.467428	-0.321381	-5.33767	0.000172744	0.0503023	0.938143
223599_at	-0.467715	0.036984	-5.33337	0.000173961	0.050463	0.931043	TRIM6	117854
227067_x_at	0.753518	-0.140827	5.32357	0.000176776	0.0509797	0.914818	NBPF26, NBPF19, NOTCH2, NBPF14, NOTCH2NL,	101060226, 4853, 25832, 100996763, 388677
202342_s_at	0.489497	0.444522	5.32327	0.000176863	0.0509797	0.914317	TRIM2	23321
201038_s_at	-0.498999	-0.359445	-5.32259	0.000177059	0.0510038	0.913198	ANP32A	8125
201930_at	-0.520793	-0.397086	-5.31129	0.00018037	0.0517937	0.894466	MCM6	4175
210180_s_at	0.43715	-0.262836	5.30882	0.000181102	0.0517981	0.890375	TRA2B	6434
204151_x_at	1.0808	1.45411	5.30846	0.000181207	0.0517981	0.889787	AKR1C1, AKR1C2	1645, 1646
202620_s_at	-0.54506	-0.431164	-5.29165	0.000186276	0.0527568	0.861895	PLOD2	5352
235766_x_at	-0.577397	-0.439428	-5.28962	0.000186898	0.0529	0.858526	RAB27A	5873
226932_at	-0.707712	0.208063	-5.23247	0.000205341	0.056575	0.763387	SSPN	8082
221676_s_at	0.741091	-0.204858	5.2239	0.000208268	0.0571033	0.74908	CORO1C	23603
225239_at	-0.747504	0.509517	-5.21896	0.000209973	0.0573948	0.740837	NEAT1	283131, 693197
206081_at	-0.531804	-0.43259	-5.21268	0.000212163	0.0576015	0.730347	SLC24A1	9187
229872_s_at	-0.401294	0.339946	-5.2097	0.000213212	0.0577099	0.725361		100996720
236400_at	-0.622798	0.257754	-5.20763	0.000213945	0.057821	0.721891	IDH1-AS1	100507475
218235_s_at	0.502821	-0.0562365	5.20362	0.000215367	0.0580671	0.715198	UTP11	51118
219518_s_at	0.404195	0.50198	5.19698	0.000217749	0.0585359	0.704077	ELL3,	80237
1554997_a_at	1.11729	-0.317316	5.19118	0.000219849	0.0587533	0.694373	PTGS2	5743
213096_at	0.394529	0.38436	5.19017	0.000220218	0.0587983	0.692677	TMCC2	9911
214022_s_at	-0.958111	0.0164512	-5.18911	0.000220604	0.0588512	0.690909	IFITM1, IFITM2	8519, 10581
233506_at	0.533402	-0.0499562	5.16536	0.000229467	0.0607523	0.651091	BZW1	9689
203138_at	0.416361	-0.108236	5.16478	0.000229687	0.0607749	0.650118	HAT1	8520
217286_s_at	-0.371142	0.0851469	-5.15442	0.000233675	0.0614449	0.632719	NDRG3	57446
243764_at	0.493531	0.352479	5.1514	0.000234849	0.061568	0.627654	VSIG1	340547
201739_at	0.833283	-0.369966	5.15136	0.000234864	0.061568	0.627588	SGK1	6446
231487_at	0.538379	0.377539	5.14902	0.00023578	0.0616699	0.623655	COX8C	341947
221987_s_at	0.474337	-0.161954	5.14462	0.00023751	0.0618828	0.616265	TSR1	55720
1555037_a_at	-0.750607	0.128093	-5.13704	0.000240523	0.0625151	0.603521	IDH1	3417
216740_at	-0.500838	0.0441365	-5.13545	0.000241163	0.0625397	0.600836
203106_s_at	-0.516608	0.0623938	-5.13284	0.000242213	0.0625967	0.596443	VPS41	27072
226474_at	-0.513377	0.0140171	-5.12873	0.000243874	0.0629187	0.589535	NLRC5	84166
218719_s_at	0.5003	-0.141025	5.10005	0.000255815	0.0650767	0.541213	GINS3	64785
208673_s_at	-0.713435	-0.69773	-5.0838	0.000262856	0.0659095	0.513768	SRSF3	6428
209713_s_at	0.550525	-0.121698	5.08108	0.000264053	0.0660732	0.509179	SLC35D1	23169
226439_s_at	-0.726859	0.146614	-5.07001	0.000268989	0.0668547	0.490457	NBEA	26960
223692_at	0.547173	-0.0982618	5.0546	0.000276019	0.0679774	0.464382	NMNAT1	64802
217808_s_at	0.379823	-0.134134	5.04352	0.000281189	0.0689107	0.445625	MAPKAP1	79109
231941_s_at	-1.54203	0.174434	-5.0299	0.000287688	0.0701633	0.422529	MUC20, MUC20P1	200958
45288_at	0.450227	0.452299	5.00375	0.000300615	0.0723844	0.378109	ABHD6	57406
241754_at	0.392338	-0.143453	4.98944	0.000307945	0.0734881	0.353762	SCAI	286205
222583_s_at	0.462549	-0.141623	4.96502	0.000320887	0.0758038	0.312161	NUP50,	10762
202084_s_at	0.590291	0.404324	4.95525	0.000326225	0.0763605	0.295489	SEC14L1	6397
209699_x_at	1.07105	1.4355	4.9526	0.000327686	0.0766311	0.290972	AKR1C1, AKR1C2	1645, 1646
204125_at	0.586239	-0.036144	4.94454	0.000332184	0.0770142	0.277196	NDUFAF1	51103
224856_at	0.508764	-0.218304	4.9332	0.000338615	0.0782218	0.25782	FKBP5	2289
226597_at	-0.480538	0.116125	-4.93077	0.000340006	0.0784816	0.253678	REEP6	92840
234863_x_at	-0.62515	-0.57865	-4.93004	0.00034043	0.0784816	0.252419	FBXO5	26271
233002_at	-0.628653	0.133731	-4.90683	0.000354081	0.080325	0.212694	PPP4R4	57718
202250_s_at	0.404122	0.320641	4.90499	0.000355185	0.0804158	0.20955	DCAF8	50717
202691_at	-0.380472	-0.375895	-4.90183	0.000357094	0.0807667	0.204133	SNRPD1	6632
212331_at	-0.388157	0.245017	-4.8976	0.00035967	0.0810436	0.196871	RBL2	5934
210594_x_at	0.36201	-0.113978	4.89457	0.000361519	0.081123	0.191691	MPZL1	9019
236331_at	-0.507566	0.140874	-4.89077	0.000363864	0.0814883	0.185159
227082_at	-0.738186	0.163507	-4.88834	0.000365364	0.0816679	0.181003	MIR568, ZBTB20	693153, 26137
201001_s_at	0.491732	-0.0741257	4.87228	0.000375474	0.0833092	0.153425	UBE2V1, TMEM189-UBE2V1	7335, 387522
212432_at	0.417776	-0.0763057	4.86847	0.000377916	0.0836441	0.146876	GRPEL1	80273
238802_at	-0.413235	0.250397	-4.86699	0.000378867	0.0836945	0.144339	TYSND1	219743
226066_at	0.410928	0.397215	4.86266	0.000381669	0.0841092	0.136895	MITF	4286
1554885_a_at	0.662232	-0.20601	4.85461	0.000386936	0.0846955	0.123049	PRIM2	5558
226512_at	-0.471899	0.0791779	-4.85138	0.000389065	0.0849978	0.117507	ZMYM2	7750
210310_s_at	0.550711	-0.193696	4.8448	0.000393452	0.0855046	0.106178	FGF5	2250
235158_at	0.550551	-0.127156	4.83515	0.000399982	0.086387	0.0895525	TMEM209	84928
215224_at	0.453761	-0.127845	4.83408	0.000400711	0.0865035	0.0877116	, RPL23	9349
1569076_a_at	0.599969	0.548863	4.82329	0.000408156	0.0875703	0.0691184
224663_s_at	0.371128	-0.238883	4.82174	0.000409237	0.0877194	0.0664476	CFL2	1073
223217_s_at	-0.888183	-0.797801	-4.79094	0.000431353	0.0905401	0.0132872	NFKBIZ	64332
228401_at	-0.543425	-0.406288	-4.77772	0.000441228	0.0921874	-0.00957187	ATAD2	29028
239231_at	0.550603	-0.15544	4.75628	0.000457753	0.0945972	-0.0467019	ZNF101	94039
1555854_at	1.6006	1.49818	4.75418	0.000459406	0.0948956	-0.0503405	AKR1C1, AKR1C2	1645, 1646
213532_at	0.41193	0.317606	4.73926	0.000471323	0.0965243	-0.0761993	ADAM17	6868
211653_x_at	1.14125	1.3869	4.73649	0.000473575	0.0968414	-0.0810116	AKR1C1, AKR1C2	1645, 1646
218203_at	0.43525	-0.0802789	4.73107	0.000478007	0.097193	-0.0904181	ALG5	29880
1554445_at	0.459133	-0.190495	4.72564	0.000482489	0.0978774	-0.0998402	ZNF85	7639
204603_at	0.492566	-0.149854	4.72543	0.000482664	0.0978774	-0.100207	EXO1	9156
200769_s_at	0.5316	-0.147094	4.70534	0.00049965	0.100117	-0.135125	MAT2A	4144
204199_at	-0.662495	0.330958	-4.69726	0.000506651	0.101192	-0.149173	RALGPS1	9649
204849_at	-0.354456	0.187167	-4.68977	0.000513239	0.101969	-0.162213	TCFL5	10732
229053_at	-0.549574	0.39492	-4.68302	0.00051925	0.102642	-0.173968	SYT17	51760
207850_at	-0.893354	-0.820539	-4.65609	0.00054397	0.105918	-0.220911	CXCL3	2921
215493_x_at	0.37067	-0.0849104	4.63472	0.000564467	0.108646	-0.258241	BTN2A1	11120
225171_at	-0.44734	-0.480528	-4.63192	0.000567213	0.10887	-0.263138	ARHGAP18	93663
212976_at	0.537175	0.287643	4.6257	0.000573356	0.109637	-0.274007	LRRC8B	23507
210761_s_at	0.771646	0.599428	4.62376	0.000575292	0.109899	-0.277408	GRB7	2886
208672_s_at	-0.484706	-0.465684	-4.62297	0.000576073	0.109987	-0.278777	SRSF3	6428
209333_at	0.731583	0.592898	4.61821	0.000580853	0.110637	-0.287116	ULK1	8408
242414_at	-0.431224	0.231574	-4.61617	0.000582904	0.110981	-0.290672	QPRT	23475
223315_at	-0.701275	0.251382	-4.61257	0.000586556	0.111489	-0.296975	NTN4	59277
204162_at	-0.66292	-0.532006	-4.61035	0.000588827	0.111734	-0.300874	NDC80	10403
222666_s_at	0.403475	-0.0727713	4.60404	0.000595308	0.112138	-0.311919	RCL1	10171
233496_s_at	0.500049	-0.272828	4.59324	0.000606579	0.113728	-0.330842	CFL2	1073
224840_at	0.413144	-0.245909	4.56202	0.000640418	0.11822	-0.385606	FKBP5	2289
230588_s_at	0.416339	0.30867	4.56163	0.00064086	0.11824	-0.386303
236451_at	-0.55665	-0.426722	-4.55743	0.000645561	0.118735	-0.393675		100996579
219390_at	0.385809	0.312567	4.55688	0.000646183	0.118802	-0.394647	FKBP14	55033
242900_at	-0.645924	-0.547258	-4.53169	0.000675199	0.1226	-0.438948	ALG10B	144245
203345_s_at	0.379269	-0.0764094	4.52638	0.000681487	0.123397	-0.448296	MTF2	22823
203640_at	-0.805179	0.275878	-4.52303	0.00068548	0.123726	-0.454188	MBNL2	10150
208716_s_at	0.390963	-0.0581902	4.52103	0.000687881	0.123914	-0.457714	TMCO1	54499
209189_at	0.723161	-0.270823	4.51466	0.000695576	0.124658	-0.468932	FOS	2353
238021_s_at	-0.541049	0.102434	-4.50959	0.000701759	0.125322	-0.477856	CRNDE	101927480
229954_at	-0.473728	-0.313516	-4.50843	0.000703191	0.125479	-0.479911	CHDH	55349
223482_at	0.38764	0.31608	4.5035	0.000709272	0.125922	-0.488593	TMEM120A	83862
238929_at	-0.444084	-0.3336	-4.50083	0.000712594	0.126295	-0.493304	SRSF8	10929
212095_s_at	-0.766143	0.0465644	-4.4987	0.000715261	0.126575	-0.497072	MTUS1	57509
1556182_x_at	-0.452468	0.189626	-4.49587	0.000718807	0.127019	-0.502057	ANKRD65	441869
221646_s_at	-0.64903	0.299855	-4.47886	0.000740536	0.129551	-0.532082	ZDHHC11, ZDHHC11B	79844
228009_x_at	0.317958	-0.0652106	4.47605	0.000744187	0.12989	-0.53704	ZNRD1,	30834
212230_at	-0.493166	0.204935	-4.4455	0.000785153	0.13399	-0.591054	PLPP3	8613
237075_at	0.550176	0.505138	4.44406	0.000787146	0.134105	-0.593608
208763_s_at	-0.447812	0.213998	-4.43457	0.000800379	0.135688	-0.610411	TSC22D3	1831
223469_at	0.557478	0.497745	4.43172	0.000804392	0.136089	-0.61545	PGPEP1	54858
203860_at	-0.344413	0.0429789	-4.42956	0.000807453	0.136328	-0.619278	PCCA	5095
203664_s_at	0.444051	-0.192547	4.42723	0.000810777	0.136687	-0.623418	, POLR2D	5433
223758_s_at	0.455847	-0.121589	4.42251	0.000817531	0.137519	-0.631777	GTF2H2, GTF2H2C, GTF2H2B	2966, 728340
239085_at	-0.497995	0.216041	-4.41332	0.00083086	0.139093	-0.648074	JDP2	122953
202488_s_at	-0.572637	0.186441	-4.41001	0.000835704	0.139397	-0.653931	FXYD3	5349, 102466205
224397_s_at	0.421016	0.495692	4.40462	0.000843684	0.13991	-0.663505	TMTC1	83857
221898_at	-0.506139	0.0852827	-4.39537	0.000857542	0.141338	-0.679919	PDPN	10630
212177_at	-0.383805	0.122273	-4.39199	0.000862661	0.14191	-0.685915	PNISR	25957
205938_at	-0.616474	0.134843	-4.37787	0.000884409	0.144541	-0.710996	PPM1E	22843
210790_s_at	0.368347	-0.143685	4.37174	0.000894036	0.145492	-0.721902	SAR1A	56681
220399_at	0.372047	0.370409	4.35576	0.000919624	0.148426	-0.750323	LINC00115,	79854
213455_at	-0.382758	0.193879	-4.34246	0.000941493	0.151	-0.773989	FAM114A1	92689
224780_at	-0.383273	0.0878894	-4.33758	0.000949653	0.151774	-0.782679	RBM17	84991
242074_at	-0.3579	-0.314984	-4.33526	0.000953572	0.152083	-0.786826
1554080_at	0.379238	-0.237958	4.33083	0.000961074	0.152901	-0.794717	CNOT9	9125
230406_at	-0.486953	0.400594	-4.32405	0.00097267	0.153854	-0.806792	ASS1	445
229797_at	-0.446655	0.204451	-4.32175	0.000976655	0.154139	-0.810908	MCOLN3	55283
1554572_a_at	0.460455	-0.143603	4.29885	0.0010171	0.157303	-0.851758	SUV39H2	79723
208956_x_at	-0.371295	-0.301371	-4.29819	0.0010183	0.157341	-0.852943	DUT	1854
202708_s_at	-0.518633	0.439958	-4.28045	0.00105086	0.160289	-0.884619	HIST2H2BE	8349
210951_x_at	0.350732	-0.15942	4.27623	0.00105877	0.161064	-0.892169	RAB27A	5873
231786_at	-0.40956	0.352201	-4.27139	0.00106791	0.162181	-0.900818	HOXA13	3209
211354_s_at	0.576356	-0.199262	4.25629	0.00109697	0.164843	-0.927831	LEPR	3953
223376_s_at	-0.306479	0.157705	-4.25142	0.00110652	0.165667	-0.936551	BRI3	25798
225310_at	-0.399849	-0.455123	-4.24785	0.00111357	0.166256	-0.942943	RBMX	27316
212400_at	0.364384	0.323988	4.24424	0.00112076	0.166781	-0.949416	FAM102A	399665
202351_at	-0.492031	0.121205	-4.23115	0.00114718	0.169378	-0.972856	ITGAV	3685
207233_s_at	0.388656	0.265355	4.23108	0.00114733	0.169378	-0.972985	MITF	4286
238686_at	0.400493	-0.194986	4.22688	0.00115595	0.1701	-0.980511	FBXO3	26273
203217_s_at	-0.327243	0.23023	-4.20884	0.00119373	0.174363	-1.01286	ST3GAL5	8869
37547_at	-0.580663	0.224901	-4.20404	0.00120401	0.175375	-1.02148	BBS9	27241
210550_s_at	-0.713576	0.130072	-4.19718	0.00121885	0.17684	-1.0338	RASGRF1	5923
202918_s_at	0.404238	-0.129697	4.18984	0.00123493	0.178532	-1.04698	MOB4, HSPE1-MOB4	25843, 100529241
226322_at	-0.439057	0.447254	-4.18882	0.00123719	0.178532	-1.04881	TMTC1	83857
203231_s_at	-0.57151	0.179537	-4.18116	0.00125423	0.179842	-1.06257	ATXN1	6310
210087_s_at	0.320985	-0.18183	4.18108	0.00125441	0.179842	-1.06271	MPZL1	9019
203947_at	0.41327	-0.380161	4.17254	0.00127371	0.181442	-1.07806	CSTF3	1479
219517_at	0.362123	0.499991	4.16992	0.00127969	0.181952	-1.08277	ELL3,	80237
244804_at	-0.524928	0.316835	-4.14452	0.00133923	0.187603	-1.12848	SQSTM1	8878
220122_at	0.483057	0.376639	4.13542	0.00136125	0.189928	-1.14486	MCTP1	79772
216228_s_at	0.458602	-0.225511	4.13181	0.00137008	0.190574	-1.15136	WDHD1	11169
230893_at	-0.50167	0.128528	-4.10979	0.00142528	0.195637	-1.19104	DNAJC21	134218
205383_s_at	-0.362018	0.0954588	-4.10969	0.00142555	0.195637	-1.19123	ZBTB20	26137
226258_at	0.442409	0.810646	4.10519	0.00143712	0.196889	-1.19935	AMN1	196394
209932_s_at	-0.389079	-0.318966	-4.08281	0.00149609	0.202287	-1.23973	DUT	1854
212984_at	-0.395258	0.100821	-4.0785	0.00150774	0.20356	-1.24752	ATF2	1386
230426_at	-0.435543	-0.4109	-4.06769	0.00153736	0.205992	-1.26705	DLD	1738
238681_at	0.579869	0.484676	4.06481	0.00154534	0.206764	-1.27225	GDPD1	284161
221899_at	-0.402863	0.118366	-4.05054	0.00158557	0.210325	-1.29805	N4BP2L2	10443
225484_at	-0.380478	-0.314786	-4.04047	0.00161462	0.212926	-1.31627	CEP41	95681
226629_at	0.408862	-0.107491	4.03842	0.0016206	0.213228	-1.31998	SLC43A2	124935
205486_at	0.374707	0.330149	4.03156	0.00164076	0.215034	-1.33239	TESK2	10420
218523_at	-0.422137	0.154682	-4.03098	0.00164249	0.215174	-1.33344	LHPP	64077
212335_at	0.327619	0.301858	4.02779	0.00165196	0.216041	-1.33921	GNS	2799
220346_at	0.384134	-0.312108	4.02337	0.00166518	0.217208	-1.34721	MTHFD2L	441024
228528_at	0.518575	-0.178508	4.01749	0.00168295	0.218567	-1.35786	C1orf132	407025, 407026
205345_at	-0.384964	-0.392269	-4.01387	0.00169399	0.219401	-1.36442	BARD1	580
45633_at	0.467037	-0.166106	4.01318	0.0016961	0.219509	-1.36567	GINS3	64785
227598_at	-0.372424	-0.235605	-4.0131	0.00169634	0.219509	-1.36581	ZBED6CL	113763
223639_s_at	0.322366	-0.0968519	4.0104	0.00170463	0.220217	-1.3707	ZNRD1	30834
200867_at	0.299956	0.237887	4.00714	0.00171471	0.221132	-1.37661	RNF114	55905
215165_x_at	0.344965	-0.191158	4.00328	0.00172669	0.221947	-1.3836	UMPS	7372
213040_s_at	0.804735	0.702325	3.99323	0.00175835	0.225164	-1.40182	NPTXR	23467
1560498_at	-0.898603	0.366401	-3.9805	0.00179929	0.228668	-1.4249
204510_at	-0.327034	-0.289428	-3.97948	0.0018026	0.228954	-1.42675	CDC7	8317
229050_s_at	0.372011	0.301764	3.95566	0.00188206	0.235762	-1.46999	, SNHG7	84973
208078_s_at	0.417156	0.488838	3.95512	0.00188388	0.23586	-1.47096	SIK1,	150094, 102724428
219155_at	0.394963	0.352096	3.95068	0.0018991	0.237059	-1.47902	PITPNC1	26207
213051_at	-0.512733	-0.412345	-3.94411	0.00192186	0.238862	-1.49096	ZC3HAV1	56829
243880_at	0.438123	0.439696	3.93408	0.00195714	0.24164	-1.50919	GOSR2	9570
204044_at	-0.40553	0.325254	-3.92951	0.0019734	0.242972	-1.51748	QPRT	23475
219294_at	0.425139	-0.1965	3.91824	0.00201419	0.245617	-1.53798	CENPQ	55166
222514_at	0.333912	0.329918	3.91568	0.00202356	0.246364	-1.54263	RRAGC,	64121
228382_at	0.379777	-0.161556	3.9152	0.00202534	0.246448	-1.54351	OTULIN	90268
212122_at	-0.447804	0.154414	-3.90903	0.00204817	0.248098	-1.55474	RHOQ	23433
213156_at	-0.601529	0.236222	-3.90659	0.00205727	0.248934	-1.55917	MIR568, ZBTB20	693153, 26137
206108_s_at	-0.450622	-0.471162	-3.88893	0.00212433	0.254062	-1.5913	SRSF6,	6431
224368_s_at	-0.301414	0.0956234	-3.88456	0.0021413	0.255433	-1.59926	NDRG3	57446
210092_at	0.357836	-0.104322	3.88327	0.00214633	0.255698	-1.60161	MAGOH, LRP8	4116, 7804
218238_at	0.348137	-0.102067	3.87657	0.00217265	0.257955	-1.61382	GTPBP4	23560
216508_x_at	-0.311462	-0.282625	-3.87008	0.00219845	0.259302	-1.62563	HMGB1P4
235130_at	-0.376353	-0.385844	-3.86648	0.0022129	0.260431	-1.63219	MIR103A2	406896
205018_s_at	-0.712672	0.0936074	-3.853	0.00226786	0.263975	-1.65675	MBNL2	10150
202819_s_at	0.436126	-0.178505	3.85062	0.00227774	0.264766	-1.6611	TCEB3	6924
239503_at	-0.432463	0.123605	-3.83148	0.00235861	0.270843	-1.696	CASC10	399726
232158_x_at	0.414845	-0.176165	3.82298	0.00239544	0.273828	-1.7115	NIPAL1	152519
229519_at	0.348089	-0.138973	3.80924	0.00245627	0.27875	-1.73658	FXR1	8087
229526_at	-0.411947	0.163786	-3.80389	0.00248035	0.280545	-1.74633	AQP11	282679
232166_at	-0.371155	0.11196	-3.79884	0.00250332	0.281979	-1.75555	CEP126	57562
219048_at	-0.45829	0.150435	-3.79822	0.00250619	0.282232	-1.75669	PIGN	23556
225582_at	0.579199	0.55516	3.79522	0.00251994	0.283135	-1.76216	ITPRIP	85450
202257_s_at	0.287463	-0.0978018	3.78812	0.00255283	0.285576	-1.77513	CD2BP2	10421
235205_at	0.361086	0.459677	3.78282	0.0025777	0.287298	-1.78482
221565_s_at	0.32849	0.351834	3.78147	0.00258405	0.287864	-1.78728	CALHM2	51063
206245_s_at	0.343727	-0.126806	3.77454	0.002617	0.289972	-1.79994	IVNS1ABP	10625
227169_at	-0.319646	0.219403	-3.7613	0.00268114	0.29471	-1.82413	DNAJC18	202052
1553510_s_at	0.266037	-0.225001	3.74711	0.0027517	0.300145	-1.85008	CNOT9	9125
202585_s_at	0.316626	-0.168849	3.72341	0.00287379	0.308395	-1.89343	NFX1	4799
1552306_at	0.398666	-0.229166	3.71267	0.00293093	0.312052	-1.91309	ALG10	84920
210663_s_at	-0.347285	0.265518	-3.68852	0.00306373	0.321238	-1.95731	KYNU	8942
219212_at	0.320438	-0.212555	3.68518	0.00308255	0.322793	-1.96342	HSPA14	51182
238953_at	-0.440556	-0.508534	-3.67187	0.00315884	0.328035	-1.98781	SP2-AS1
205992_s_at	-0.430358	0.325525	-3.65893	0.00323486	0.333342	-2.01152	IL15	3600
202520_s_at	-0.275826	-0.306421	-3.65773	0.00324195	0.333953	-2.0137	MLH1	4292
210187_at	0.37782	-0.117407	3.64892	0.00329491	0.336858	-2.02986	FKBP1A	2280, 102465524
227088_at	-0.353802	0.284382	-3.6461	0.00331207	0.338005	-2.03504	PDE5A	8654
236834_at	-0.428562	-0.356236	-3.638	0.00336175	0.341772	-2.04988	SCFD2	152579
210114_at	-0.263128	0.17742	-3.59761	0.00362125	0.35979	-2.12395	INVS	27130
238804_at	-0.613525	0.665303	-3.58199	0.003727	0.366772	-2.15261
208863_s_at	-0.382319	-0.398115	-3.57964	0.0037432	0.367968	-2.15693	SRSF1	6426
226656_at	-0.372856	0.18203	-3.56819	0.00382309	0.372835	-2.17794	CRTAP	10491
220688_s_at	0.378392	-0.214521	3.56301	0.0038598	0.375695	-2.18745	MRTO4	51154
204235_s_at	-1.08822	0.341091	-3.55358	0.00392753	0.379436	-2.20476	GULP1	51454
225755_at	-0.307266	0.114875	-3.54553	0.00398633	0.38334	-2.21954	KLHDC8B	200942
220865_s_at	0.408928	-0.221668	3.5413	0.00401756	0.38528	-2.2273	PDSS1	23590
235117_at	0.352819	-0.147194	3.52943	0.00410665	0.390857	-2.24911	CHAC2	494143
225073_at	0.294711	-0.123409	3.52731	0.00412273	0.391628	-2.253	PPHLN1	51535
238151_at	0.333809	0.322154	3.52464	0.00414311	0.392669	-2.2579
224413_s_at	0.339715	-0.151111	3.51925	0.00418457	0.394907	-2.2678	TM2D2	83877
223518_at	0.415153	-0.192316	3.51373	0.0042275	0.397271	-2.27794	DFFA	1676
219472_at	0.336392	-0.164187	3.50015	0.00433496	0.403714	-2.30288	CENPO	79172
229587_at	-0.267828	-0.20009	-3.49979	0.00433782	0.40372	-2.30354	UBA2	10054
223179_at	0.472814	0.506997	3.49111	0.00440801	0.407922	-2.31949	YPEL3	83719
1553158_at	0.33863	0.32665	3.48645	0.00444619	0.409547	-2.32805	CEP19, RNU6-646P	84984
202899_s_at	-0.343808	-0.538242	-3.48047	0.00449566	0.41235	-2.33904	SRSF3	6428
228155_at	-0.596969	0.314254	-3.47923	0.00450598	0.41313	-2.34132	FAM213A	84293
211984_at	-0.44494	-0.570501	-3.46549	0.00462202	0.42044	-2.36656	CALM1	801, 805
209514_s_at	0.320755	-0.155026	3.46453	0.00463027	0.420752	-2.36833	RAB27A	5873
202706_s_at	0.316274	-0.186358	3.46093	0.00466121	0.422424	-2.37494	UMPS	7372
201111_at	-0.280923	-0.290284	-3.45184	0.00474032	0.426618	-2.39164	CSE1L	1434
227962_at	0.305807	0.371824	3.44796	0.0047745	0.428804	-2.39878	ACOX1	51
232004_at	0.29662	0.268047	3.44735	0.00477989	0.428991	-2.39989	HNRNPR	10236
235394_at	0.316247	-0.228269	3.44099	0.0048365	0.432535	-2.41157	PLAA	9373
241689_at	0.308139	0.378273	3.44025	0.00484321	0.432795	-2.41295	METTL14	57721
201413_at	-0.288409	0.146015	-3.4393	0.00485172	0.433224	-2.41469	HSD17B4	3295
1562019_at	-0.702477	0.344958	-3.43675	0.00487469	0.434413	-2.41938	NT5DC4	284958
203347_s_at	0.320344	-0.151691	3.43106	0.0049263	0.437213	-2.42982	MTF2	22823
222286_at	0.270684	0.29684	3.42425	0.0049889	0.441281	-2.44234	SNAPC3	6619
212686_at	-0.392001	0.332839	-3.41879	0.00503961	0.444409	-2.45237	PPM1H	57460
203355_s_at	0.429983	0.407252	3.40193	0.00519962	0.454096	-2.48336	PSD3	23362
229500_at	0.259433	-0.128534	3.39467	0.00527019	0.457731	-2.49672	SLC30A9	10463
1554667_s_at	0.283488	-0.106854	3.38407	0.00537484	0.464159	-2.51619	METTL8	79828
57715_at	0.324112	0.358173	3.37942	0.00542142	0.466677	-2.52474	CALHM2	51063
235923_at	0.298423	-0.134087	3.37904	0.00542523	0.466677	-2.52544	VTI1A	143187
244743_x_at	0.540978	-0.386506	3.36535	0.00556482	0.475377	-2.55059	ZNF138	7697
209715_at	0.406101	-0.185285	3.36431	0.00557556	0.475626	-2.5525	CBX5	23468, 100616400
1555606_a_at	0.381205	0.466773	3.35255	0.00569859	0.482681	-2.57411	GDPD1	284161
229181_s_at	0.34835	-0.258981	3.35144	0.00571043	0.482917	-2.57616	HAUS2	55142
204400_at	-0.280456	0.272803	-3.34804	0.0057466	0.485031	-2.58241	EFS	10278
219238_at	-0.272473	0.125845	-3.34466	0.00578278	0.48673	-2.58862	PIGV	55650
203285_s_at	-0.421022	0.128073	-3.33551	0.00588186	0.492246	-2.60542	HS2ST1	9653
208378_x_at	0.492559	-0.283254	3.33078	0.00593381	0.495499	-2.61412	FGF5	2250
202341_s_at	0.377054	0.385349	3.325	0.00599781	0.499468	-2.62473	TRIM2	23321
226446_at	0.341712	0.328876	3.32409	0.00600801	0.499951	-2.62641	HES6	55502
223384_s_at	0.335374	0.449493	3.32236	0.00602732	0.50083	-2.62958	TRIM4	89122
208662_s_at	-0.335294	0.125313	-3.31338	0.0061288	0.506201	-2.64609	TTC3	7267
203816_at	-0.292822	-0.294738	-3.30764	0.0061945	0.509873	-2.65663	DGUOK	1716
217925_s_at	0.26118	0.258573	3.30141	0.00626659	0.513903	-2.66807	C6orf106	64771
238927_at	0.361684	-0.0606581	3.29754	0.00631185	0.515984	-2.67518
229533_x_at	0.276517	-0.168738	3.29249	0.00637144	0.519112	-2.68446	ZNF680	340252
238767_at	-0.355235	0.137222	-3.28194	0.0064977	0.525697	-2.70384
211712_s_at	-0.431493	0.24444	-3.28044	0.00651582	0.526508	-2.7066	ANXA9	8416
203856_at	0.240455	-0.237824	3.27977	0.00652397	0.526979	-2.70783	VRK1	7443
222443_s_at	0.230497	-0.147166	3.27924	0.00653032	0.527303	-2.70879	RBM8B, RBM8A	9939
229312_s_at	0.315501	0.281733	3.27043	0.0066383	0.533072	-2.72498	GKAP1	80318
204872_at	-0.314444	0.159869	-3.26526	0.00670236	0.536623	-2.73446	, TLE4	7091
236692_at	-0.287199	-0.36602	-3.2459	0.00694826	0.54954	-2.77002
206857_s_at	0.343197	0.403418	3.21309	0.00738586	0.571955	-2.83024	FKBP1B, MFSD2B	2281, 388931
1554114_s_at	0.499046	-0.259475	3.21188	0.00740248	0.572815	-2.83245	SSH2	85464
1556181_at	-0.310705	0.166868	-3.21082	0.0074171	0.573751	-2.8344	ANKRD65	441869
227062_at	-0.64406	0.374079	-3.20733	0.00746549	0.576786	-2.84081	NEAT1	283131, 693197
230748_at	0.626109	-0.713842	3.20339	0.00752039	0.579246	-2.84803	SLC16A6	9120
224523_s_at	-0.302683	-0.353575	-3.19842	0.00759031	0.582206	-2.85714	CMSS1	84319
224714_at	0.267456	-0.189763	3.1983	0.00759207	0.582236	-2.85737	NIFK	84365
205642_at	-0.350402	-0.356111	-3.18609	0.0077666	0.590333	-2.87975	CNTRL	11064
220298_s_at	-0.297094	0.119125	-3.17976	0.00785874	0.595359	-2.89136	SPATA6	54558
50965_at	-0.407691	0.336001	-3.17696	0.00789986	0.597877	-2.8965	RAB26	25837
201471_s_at	-0.292894	0.40504	-3.16748	0.00804055	0.603841	-2.91387	SQSTM1	8878
209520_s_at	0.23271	-0.184876	3.1601	0.00815189	0.61045	-2.9274	NCBP1	4686
204519_s_at	0.280018	0.402786	3.15958	0.00815985	0.610756	-2.92836	PLLP	51090
221552_at	0.24343	0.341409	3.15932	0.00816376	0.610836	-2.92883	ABHD6	57406
225019_at	-0.302784	0.160046	-3.15484	0.00823215	0.613996	-2.93704	CAMK2D	817
1554390_s_at	0.314945	-0.211771	3.15369	0.00824981	0.614746	-2.93915	ACTR2	10097
206068_s_at	-0.291657	-0.255905	-3.15204	0.00827524	0.615709	-2.94217	ACADL	33
228702_at	0.401452	0.485009	3.14525	0.00838058	0.620324	-2.95461	LINC-PINT	378805
234295_at	0.299391	-0.123422	3.14134	0.00844187	0.623304	-2.96178	DBR1	51163
201202_at	-0.257285	-0.274545	-3.13771	0.00849914	0.625835	-2.96842	PCNA	5111
226964_at	-0.374849	0.184315	-3.13676	0.00851424	0.626446	-2.97017	TTBK2	146057
219001_s_at	-0.340858	0.168183	-3.13234	0.00858477	0.629373	-2.97827	DCAF10	79269
236172_at	-0.321449	0.214525	-3.12221	0.00874834	0.636714	-2.99682	LTB4R	1241
230060_at	-0.390239	-0.442898	-3.12065	0.00877379	0.637499	-2.99967	CDCA7	83879
235990_at	-0.330571	0.254667	-3.1195	0.00879262	0.63837	-3.00178
222837_s_at	0.274083	-0.162605	3.11327	0.00889536	0.642534	-3.01319	NAA15	80155
209343_at	-0.249017	0.416768	-3.11042	0.00894269	0.645031	-3.0184	EFHD1	80303
235133_at	-0.25953	0.101196	-3.10428	0.00904558	0.649543	-3.02963	ZDHHC14	79683
209019_s_at	0.297164	0.328772	3.08017	0.00946135	0.669698	-3.07373	PINK1	65018, 102464833
202627_s_at	0.308973	0.283442	3.07118	0.00962138	0.677412	-3.09018	SERPINE1	5054
226631_at	-0.305436	-0.365505	-3.05822	0.00985666	0.688242	-3.11387	METTL10	399818
244427_at	-0.429322	-0.508312	-3.05481	0.00991942	0.690737	-3.12009
206173_x_at	0.255524	-0.213665	3.05173	0.00997657	0.693221	-3.12572	GABPB1	2553, 55056

## Sheet: WS_CM
AffyIDs	logFC	AveExpr	t	P.Value	adj.P.Val	B	Gene_Symbol	EntrezID
202831_at	0.999353	0.707622	10.3044	2.42614e-07	0.110352	3.92529	GPX2	2877
213023_at	-0.624206	-0.224739	-7.80562	4.6164e-06	1	2.57249	UTRN	7402
1562102_at	1.11445	1.39996	6.43934	3.10182e-05	1	1.50391
227169_at	0.449182	0.219403	5.28556	0.000188149	1	0.359886	DNAJC18	202052
239348_at	-0.437859	-0.403056	-5.00196	0.000301521	1	0.0410901
209921_at	0.717152	0.750169	4.92706	0.000342148	1	-0.0456282	SLC7A11	23657
204151_x_at	0.994096	1.45411	4.88259	0.000368951	1	-0.0976198	AKR1C1, AKR1C2	1645, 1646
205828_at	0.829718	1.02831	4.8378	0.000398178	1	-0.15036	MMP3	4314
209699_x_at	1.00516	1.4355	4.64793	0.000551709	1	-0.378053	AKR1C1, AKR1C2	1645, 1646
209875_s_at	0.943879	1.0883	4.6478	0.000551833	1	-0.378211	SPP1	6696
204475_at	1.00272	1.70345	4.59888	0.000600665	1	-0.437951	MMP1	4312
229991_s_at	-0.377591	-0.123214	-4.52724	0.000680464	1	-0.526229
210663_s_at	0.421198	0.265518	4.47355	0.000747463	1	-0.592994	KYNU	8942
235681_at	0.405163	0.277134	4.41877	0.000822921	1	-0.661635
232593_at	-0.368355	0.221597	-4.34132	0.000943393	1	-0.7596	NEURL3	93082
216594_x_at	0.931149	1.34704	4.32259	0.000975198	1	-0.783454	AKR1C1, AKR1C2	1645, 1646
217678_at	0.699585	0.770008	4.21549	0.00117967	1	-0.920978	SLC7A11	23657
244361_at	0.307108	-0.115819	4.19959	0.00121362	1	-0.941561	DPF2	5977
208161_s_at	0.691549	0.496233	4.05311	0.00157824	1	-1.13313	ABCC3	8714
205603_s_at	-0.343686	-0.335577	-4.04571	0.00159942	1	-1.1429	DIAPH2	1730
235394_at	-0.366493	-0.228269	-3.98771	0.00177599	1	-1.21978	PLAA	9373
226811_at	-0.461082	0.639744	-3.93362	0.00195877	1	-1.29194	FAM46C	54855
207183_at	-0.39183	-0.455118	-3.92515	0.0019891	1	-1.30328	GPR19	2842
204820_s_at	-0.302575	-0.206421	-3.90861	0.00204972	1	-1.32546	BTN3A3, BTN3A2	10384, 11118
209755_at	-0.581254	-0.156905	-3.87383	0.0021835	1	-1.37222	NMNAT2	23057
201016_at	-0.362653	-0.30859	-3.85225	0.00227096	1	-1.40131	EIF1AXP1, EIF1AX	1964
207485_x_at	-0.3492	-0.124074	-3.83046	0.00236296	1	-1.43076	BTN3A1	11119
226016_at	-0.45245	-0.534265	-3.78638	0.00256098	1	-1.49055	CD47	961
225716_at	-0.276223	-0.491227	-3.78398	0.00257226	1	-1.49382	BRI3BP	140707
211653_x_at	0.911354	1.3869	3.78237	0.00257983	1	-1.49601	AKR1C1, AKR1C2	1645, 1646
235753_at	0.334442	-0.120836	3.77314	0.00262374	1	-1.50857	HOXA7	3204
231786_at	0.35658	0.352201	3.71885	0.00289789	1	-1.58266	HOXA13	3209
227998_at	0.324792	0.31526	3.66561	0.00319539	1	-1.65571	S100A16	140576
209641_s_at	0.432224	0.414728	3.63085	0.00340627	1	-1.70358	ABCC3	8714
213294_at	-0.267268	-0.242541	-3.61709	0.00349361	1	-1.72257	EIF2AK2	5610
232004_at	-0.310498	0.268047	-3.60865	0.00354838	1	-1.73425	HNRNPR	10236
224701_at	-0.329213	-0.0638722	-3.59537	0.00363624	1	-1.75261	PARP14	54625
202270_at	-0.392158	-0.3054	-3.58444	0.00371025	1	-1.76775	GBP1	2633
216918_s_at	-0.333986	-0.159504	-3.55315	0.00393069	1	-1.81115	DST	667
225710_at	-0.286064	-0.558725	-3.55094	0.00394671	1	-1.81421	GNB4	59345
244427_at	-0.496134	-0.508312	-3.53022	0.00410066	1	-1.84302
203665_at	0.783801	0.931548	3.52929	0.00410767	1	-1.8443	HMOX1	3162
204279_at	-0.307083	-0.455621	-3.52524	0.00413854	1	-1.84994	PSMB9	5698
222930_s_at	0.275876	-0.165668	3.50439	0.00430109	1	-1.87898	AGMAT	79814
216228_s_at	-0.38651	-0.225511	-3.48229	0.00448054	1	-1.90982	WDHD1	11169
231897_at	0.337509	0.504871	3.47265	0.00456122	1	-1.9233	, PTGR1	22949
207528_s_at	0.698869	0.927738	3.467	0.00460914	1	-1.93119	SLC7A11	23657
227539_at	-0.297505	0.0617239	-3.46291	0.00464418	1	-1.93691
206884_s_at	-0.49921	-0.651004	-3.35358	0.00568771	1	-2.09037	SCEL	8796
236777_at	0.262335	0.393216	3.33654	0.00587065	1	-2.1144
204646_at	-0.369777	-0.00573185	-3.33224	0.00591772	1	-2.12046	DPYD	1806
1552921_a_at	-0.278437	-0.369411	-3.29882	0.00629692	1	-2.16765	FIGNL1	63979
201118_at	0.382386	0.487704	3.29483	0.00634379	1	-2.17329	PGD	5226
206385_s_at	-0.427994	-0.441481	-3.23185	0.0071323	1	-2.26246	ANK3	288
219067_s_at	-0.230245	-0.273369	-3.23137	0.00713864	1	-2.26314	NSMCE4A	54780
226122_at	-0.279575	0.117501	-3.2166	0.00733768	1	-2.2841	PLEKHG1	57480
242837_at	-0.355703	-0.42355	-3.2087	0.00744641	1	-2.29531
219720_s_at	0.22838	0.179162	3.20498	0.00749823	1	-2.3006	GPATCH2L	55668
202458_at	-0.396736	-0.0267566	-3.17735	0.00789406	1	-2.33984	PRSS23	11098
222740_at	-0.280671	-0.272372	-3.16659	0.00805391	1	-2.35514	ATAD2	29028
230112_at	0.338804	-0.0902993	3.15235	0.00827045	1	-2.3754	MARCH4	57574
1569156_at	0.497878	0.645325	3.14613	0.00836694	1	-2.38426	ZNF846	162993
214022_s_at	-0.579863	0.0164512	-3.14053	0.00845473	1	-2.39224	IFITM1, IFITM2	8519, 10581
242074_at	-0.258685	-0.314984	-3.13345	0.00856689	1	-2.4023
224484_s_at	-0.277127	0.00586018	-3.12379	0.00872254	1	-2.41606	BRMS1L	84312
1555852_at	-0.366011	-0.359853	-3.12349	0.00872752	1	-2.4165	PSMB8-AS1	100507463
227293_at	-0.253544	-0.351715	-3.09803	0.00915165	1	-2.45278
219895_at	-0.51848	0.0618948	-3.09365	0.00922659	1	-2.45902	TMEM255A	55026
221646_s_at	0.44825	0.299855	3.09331	0.00923256	1	-2.45951	ZDHHC11, ZDHHC11B	79844
1555854_at	1.03967	1.49818	3.08806	0.00932336	1	-2.467	AKR1C1, AKR1C2	1645, 1646
210559_s_at	-0.314259	-0.564405	-3.06287	0.00977147	1	-2.50292	CDK1	983
206504_at	-0.276024	-0.302244	-3.06285	0.00977191	1	-2.50296	CYP24A1	1591

## Sheet: STE14
AffyIDs	logFC	AveExpr	t	P.Value	adj.P.Val	B	Gene_Symbol	EntrezID
202437_s_at	0.89178	0.584399	5.79306	8.32151e-05	1	-2.32501	CYP1B1	1545
204337_at	-0.355196	-0.113904	-4.59483	0.000604898	1	-2.73505	RGS4	5999
213849_s_at	0.428951	0.239147	4.52447	0.000683761	1	-2.76371	PPP2R2B	5521
211822_s_at	0.389994	0.268134	4.34768	0.000932855	1	-2.83819	NLRP1	22861
213413_at	0.579484	0.517404	4.241	0.00112724	1	-2.88485	STON1	11037
229197_at	-0.323661	-0.232104	-4.15212	0.00132113	1	-2.92473	ING5	84289
1557584_at	-0.390846	-0.426475	-4.03031	0.00164446	1	-2.98088	, RN7SL832P
213023_at	-0.299918	-0.224739	-3.75044	0.00273499	1	-3.11644	UTRN	7402
205519_at	-0.333302	-0.541908	-3.66562	0.00319533	1	-3.15932	WDR76	79968
229846_s_at	-0.293364	-0.208742	-3.64418	0.00332374	1	-3.17028	MAPKAP1	79109
242150_at	-0.345046	-0.377622	-3.63699	0.00336799	1	-3.17397
240771_at	0.352523	-0.11656	3.52959	0.0041054	1	-3.22979	C1orf101	257044
243764_at	0.329702	0.352479	3.44138	0.00483306	1	-3.27659	VSIG1	340547
218523_at	0.35661	0.154682	3.40525	0.00516771	1	-3.296	LHPP	64077
222963_s_at	-0.319946	0.162797	-3.32758	0.00596919	1	-3.33822	IL1RAPL1	11141
205992_s_at	0.388543	0.325525	3.30342	0.00624329	1	-3.35147	IL15	3600
236331_at	0.341549	0.140874	3.29108	0.00638821	1	-3.35827
1557644_at	-0.332763	0.213558	-3.28596	0.00644921	1	-3.36109	RUNDC3A-AS1
207247_s_at	0.319147	0.438091	3.23699	0.0070644	1	-3.38824	ZFX, ZFY	7543, 7544
203498_at	0.593926	0.445623	3.189	0.00772464	1	-3.41507	RCAN2	10231
229053_at	0.363132	0.39492	3.09432	0.00921519	1	-3.46867	SYT17	51760
209824_s_at	0.267174	0.352054	3.07189	0.00960865	1	-3.48149	ARNTL	406
1555731_a_at	-0.317106	-0.322836	-3.07059	0.0096319	1	-3.48223	AP1S3	130340
222941_at	0.364177	-0.265064	3.05902	0.00984197	1	-3.48886	USP46	64854
235456_at	0.34441	0.571156	3.05369	0.00994015	1	-3.49192

## Sheet: STE474
AffyIDs	logFC	AveExpr	t	P.Value	adj.P.Val	B	Gene_Symbol	EntrezID
205681_at	-4.43875	-1.07791	-32.9562	3.29114e-13	1.49697e-07	19.3784	BCL2A1	597
213112_s_at	3.22712	0.834407	30.2539	9.15169e-13	2.08132e-07	18.664	SQSTM1	8878
207332_s_at	2.31369	0.529179	28.7967	1.64954e-12	2.50097e-07	18.2334	TFRC	7037
232593_at	2.37072	0.221597	27.9406	2.36389e-12	2.68803e-07	17.9639	NEURL3	93082
221577_x_at	4.24936	0.736524	27.0465	3.48233e-12	3.16787e-07	17.6683	GDF15	9518
207038_at	-3.41603	-0.792374	-26.2739	4.91653e-12	3.72712e-07	17.4004	SLC16A6P1, SLC16A6	9120
244829_at	2.0745	0.376306	25.1665	8.20269e-12	4.46166e-07	16.9952	LINC00518
208691_at	1.89004	0.457787	25.019	8.7961e-12	4.46166e-07	16.9392	TFRC	7037
235456_at	2.82089	0.571156	25.0113	8.8282e-12	4.46166e-07	16.9363
209343_at	1.92498	0.416768	24.0446	1.40937e-11	6.41048e-07	16.557	EFHD1	80303
226258_at	2.56049	0.810646	23.7592	1.6237e-11	6.71396e-07	16.4408	AMN1	196394
230492_s_at	-2.37263	-0.448727	-22.9845	2.4046e-11	9.11441e-07	16.1151	, GPCPD1	56261
1555427_s_at	-1.91709	-0.46855	-22.1045	3.81563e-11	1.33503e-06	15.726	SYNCRIP	10492
208506_at	-1.81103	-0.459867	-21.8688	4.33084e-11	1.40705e-06	15.6182	HIST1H3F	8968
229428_at	-1.59572	-0.500111	-21.2223	6.17147e-11	1.87139e-06	15.3141	TIMM23B	100652748
229872_s_at	1.59526	0.339946	20.7101	8.23132e-11	2.23272e-06	15.0642		100996720
201471_s_at	1.91281	0.40504	20.686	8.34483e-11	2.23272e-06	15.0522	SQSTM1	8878
209911_x_at	3.02546	0.846434	20.4936	9.31589e-11	2.35407e-06	14.9561	HIST1H2BE, HIST1H2BD	8344, 3017
218093_s_at	1.78171	0.383494	20.33	1.02375e-10	2.45079e-06	14.8734	ANKRD10	55608
203947_at	-1.95888	-0.380161	-19.7777	1.41537e-10	3.2189e-06	14.5877	CSTF3	1479
225239_at	2.77138	0.509517	19.3494	1.83038e-10	3.9645e-06	14.359	NEAT1	283131, 693197
209025_s_at	-1.81357	-0.433822	-19.2312	1.96677e-10	4.06629e-06	14.2948	SYNCRIP	10492
215629_s_at	-2.41958	-0.636675	-19.1052	2.12442e-10	4.20127e-06	14.2257	DLEU2, DLEU2L	406948
218894_s_at	-1.6674	-0.439241	-18.9332	2.3621e-10	4.47665e-06	14.1305	MAGOHB	55110
236302_at	1.69493	0.195773	18.8077	2.55357e-10	4.64595e-06	14.0604	PPM1E	22843
204446_s_at	1.71715	0.387436	18.5454	3.01015e-10	5.26601e-06	13.9118	ALOX5	240
209231_s_at	-1.51174	-0.351081	-17.8776	4.62207e-10	7.69687e-06	13.5216	DCTN5	84516
224428_s_at	-2.14872	-0.823346	-17.8396	4.73812e-10	7.69687e-06	13.4989	CDCA7	83879
208937_s_at	2.62067	0.423148	17.6901	5.22732e-10	7.98191e-06	13.4088	ID1	3397
212173_at	-1.74555	-0.660407	-17.6305	5.43743e-10	7.98191e-06	13.3726	AK2	204
226322_at	1.84289	0.447254	17.5821	5.61456e-10	7.98191e-06	13.3432	TMTC1	83857
204926_at	-2.08373	-0.521232	-17.5819	5.61552e-10	7.98191e-06	13.343	INHBA	3624
238804_at	2.99597	0.665303	17.4916	5.96272e-10	8.19077e-06	13.2878
235681_at	1.6002	0.277134	17.452	6.12262e-10	8.19077e-06	13.2635
230748_at	-3.38847	-0.713842	-17.3366	6.61494e-10	8.59656e-06	13.1921	SLC16A6	9120
220346_at	-1.64757	-0.312108	-17.2565	6.98182e-10	8.8213e-06	13.1423	MTHFD2L	441024
230043_at	2.53973	0.24633	17.159	7.45822e-10	9.16854e-06	13.0813
227020_at	1.68548	0.438455	17.0991	7.76801e-10	9.22277e-06	13.0436	YPEL2	388403
213075_at	1.88961	0.28774	17.0729	7.90787e-10	9.22277e-06	13.027	OLFML2A	169611
208319_s_at	-1.53754	-0.60857	-16.8906	8.95992e-10	1.00365e-05	12.9111	RBM3	5935
215071_s_at	3.08816	0.828751	16.8766	9.04689e-10	1.00365e-05	12.9021	HIST1H2AC	8334
204658_at	-1.6239	-0.501076	-16.7979	9.55206e-10	1.03446e-05	12.8516	TRA2A	29896
1555756_a_at	2.54179	0.608457	16.6892	1.03006e-09	1.07645e-05	12.7813	CLEC7A	64581
227517_s_at	-1.45124	-0.339081	-16.6737	1.04131e-09	1.07645e-05	12.7712	GAS5	60674
219518_s_at	1.29313	0.50198	16.6265	1.07616e-09	1.08776e-05	12.7405	ELL3,	80237
204151_x_at	3.36814	1.45411	16.5429	1.14104e-09	1.11642e-05	12.6858	AKR1C1, AKR1C2	1645, 1646
207469_s_at	1.67684	0.602413	16.5273	1.15361e-09	1.11642e-05	12.6756	PIR	8544
202708_s_at	1.9977	0.439958	16.4877	1.18618e-09	1.12402e-05	12.6496	HIST2H2BE	8349
212331_at	1.29904	0.245017	16.3907	1.2703e-09	1.17917e-05	12.5855	RBL2	5934
219880_at	1.36665	0.368907	16.3022	1.35259e-09	1.19005e-05	12.5266
206102_at	-1.37625	-0.450839	-16.2955	1.35913e-09	1.19005e-05	12.5221	GINS1	9837
206011_at	1.53731	0.158411	16.2732	1.38084e-09	1.19005e-05	12.5073	CASP1	834
205207_at	-1.65852	-0.93021	-16.2673	1.38668e-09	1.19005e-05	12.5033	IL6	3569
205519_at	-1.47302	-0.541908	-16.2	1.45493e-09	1.2255e-05	12.4582	WDR76	79968
202899_s_at	-1.58709	-0.538242	-16.0666	1.60133e-09	1.32429e-05	12.3681	SRSF3	6428
226140_s_at	1.77852	0.365856	16.0367	1.63626e-09	1.32902e-05	12.3478	OTUD1	220213
230406_at	1.79901	0.400594	15.9749	1.71109e-09	1.35186e-05	12.3057	ASS1	445
212686_at	1.83052	0.332839	15.9647	1.72382e-09	1.35186e-05	12.2987	PPM1H	57460
219517_at	1.38209	0.499991	15.915	1.78714e-09	1.37776e-05	12.2647	ELL3,	80237
226281_at	1.7934	0.358732	15.8534	1.86921e-09	1.41701e-05	12.2223	DNER	92737
200811_at	-1.44535	-0.401522	-15.7794	1.97314e-09	1.47128e-05	12.1712	CIRBP	1153
220840_s_at	-1.44009	-0.488007	-15.7257	2.05249e-09	1.50576e-05	12.1339	C1orf112	55732
225348_at	-1.37025	-0.557293	-15.661	2.1527e-09	1.55421e-05	12.0888	SRSF10	10772
224280_s_at	1.16681	0.403031	15.5714	2.30039e-09	1.62264e-05	12.026	MTFR1L	56181
204614_at	-2.92733	-0.0244334	-15.5606	2.31883e-09	1.62264e-05	12.0184	SERPINB2	5055
229053_at	1.8069	0.39492	15.3969	2.62009e-09	1.80567e-05	11.9025	SYT17	51760
204044_at	1.58244	0.325254	15.3336	2.74769e-09	1.86535e-05	11.8573	QPRT	23475
207183_at	-1.52169	-0.455118	-15.2435	2.94107e-09	1.96726e-05	11.7925	GPR19	2842
225710_at	-1.22299	-0.558725	-15.1811	3.08339e-09	2.00491e-05	11.7475	GNB4	59345
210180_s_at	-1.25	-0.262836	-15.1802	3.08551e-09	2.00491e-05	11.7469	TRA2B	6434
209699_x_at	3.27654	1.4355	15.1509	3.15508e-09	2.00694e-05	11.7256	AKR1C1, AKR1C2	1645, 1646
200892_s_at	-1.29417	-0.326132	-15.1291	3.20789e-09	2.00694e-05	11.7098	TRA2B	6434
209891_at	-1.62598	-0.472318	-15.1142	3.24441e-09	2.00694e-05	11.699	SPC25	57405
202533_s_at	-1.59196	-0.448537	-15.1059	3.26512e-09	2.00694e-05	11.6929	DHFR, DHFRP1	1719
228010_at	1.5889	0.396801	15.0551	3.39415e-09	2.05349e-05	11.6559	PPP2R2C	5522
221521_s_at	-1.25428	-0.37909	-15.0383	3.43828e-09	2.05349e-05	11.6436	GINS2	51659
228248_at	1.19654	0.290807	15.0239	3.4763e-09	2.05349e-05	11.6331	RICTOR	253260
205051_s_at	1.32154	0.291232	14.9131	3.78547e-09	2.1442e-05	11.5516	KIT	3815
214141_x_at	-1.07511	-0.309801	-14.9052	3.8087e-09	2.1442e-05	11.5458	SRSF7	6432
200987_x_at	-1.04939	-0.132646	-14.9041	3.81186e-09	2.1442e-05	11.545	PSME3	10197
201272_at	1.37474	0.477809	14.8968	3.83349e-09	2.1442e-05	11.5396	AKR1B1	231
229566_at	1.90995	0.202936	14.8516	3.9701e-09	2.1442e-05	11.506	WFDC21P
203140_at	1.89204	0.59877	14.843	3.99647e-09	2.1442e-05	11.4997	BCL6	604
200748_s_at	1.27121	0.351771	14.8308	4.03459e-09	2.1442e-05	11.4906	FTH1P20, FTH1P2, FTH1P11, FTH1, FTH1P16	2495
224663_s_at	-1.14134	-0.238883	-14.8284	4.04195e-09	2.1442e-05	11.4889	CFL2	1073
204199_at	2.09083	0.330958	14.8245	4.05412e-09	2.1442e-05	11.486	RALGPS1	9649
213096_at	1.11696	0.38436	14.6941	4.48787e-09	2.34632e-05	11.3885	TMCC2	9911
243774_at	1.51147	0.28454	14.67	4.57329e-09	2.36381e-05	11.3704	LINC00969, MUC20	200958
223834_at	-1.78061	-0.326275	-14.6429	4.67125e-09	2.38732e-05	11.3501	CD274	29126
227176_at	1.38446	0.0688248	14.6133	4.78124e-09	2.41638e-05	11.3277	SLC2A13	114134
234989_at	2.74469	0.4948	14.4681	5.36188e-09	2.6716e-05	11.2175	NEAT1	283131, 693197
213375_s_at	2.42923	0.716562	14.4583	5.40372e-09	2.6716e-05	11.21	N4BP2L1	90634
224797_at	-1.83902	-0.208557	-14.4356	5.50241e-09	2.69114e-05	11.1926	ARRDC3	57561
1554711_at	1.4562	0.390014	14.3974	5.67204e-09	2.74459e-05	11.1634	CALHM3	119395
209921_at	2.07685	0.750169	14.2686	6.28729e-09	3.01028e-05	11.0641	SLC7A11	23657
201170_s_at	1.57006	0.431758	14.2457	6.40425e-09	3.01306e-05	11.0463	BHLHE40	8553
226312_at	1.27793	0.408002	14.2391	6.43845e-09	3.01306e-05	11.0411	RICTOR	253260
211984_at	-1.82686	-0.570501	-14.2288	6.49184e-09	3.01306e-05	11.0332	CALM1	801, 805
204400_at	1.18967	0.272803	14.202	6.63353e-09	3.04773e-05	11.0123	EFS	10278
225699_at	-1.42535	-0.281017	-14.1768	6.77005e-09	3.07935e-05	10.9926	SNHG15
231786_at	1.35634	0.352201	14.1456	6.94299e-09	3.12674e-05	10.9683	HOXA13	3209
218175_at	1.43178	0.381963	14.1221	7.07624e-09	3.15551e-05	10.9499	CCDC92	80212
222963_s_at	1.35095	0.162797	14.0505	7.50043e-09	3.31219e-05	10.8936	IL1RAPL1	11141
228653_at	1.21431	0.333076	13.9326	8.25916e-09	3.61218e-05	10.8002	SAMD5	389432
208673_s_at	-1.94893	-0.69773	-13.8877	8.56951e-09	3.71222e-05	10.7644	SRSF3	6428
220651_s_at	-1.4452	-0.223047	-13.8713	8.68553e-09	3.72698e-05	10.7514	MCM10	55388
205521_at	-1.24176	-0.323149	-13.856	8.79588e-09	3.73906e-05	10.7392	EXOG	9941
226511_at	1.27677	0.22898	13.7573	9.54393e-09	4.0058e-05	10.6599	DCAF10	79269
218537_at	2.12008	0.39473	13.7503	9.59952e-09	4.0058e-05	10.6543	HCFC1R1	54985
229287_at	1.31874	0.132472	13.7098	9.92826e-09	4.10532e-05	10.6215	PCNX1	22990
242414_at	1.27808	0.231574	13.6816	1.01639e-08	4.16491e-05	10.5987	QPRT	23475
209853_s_at	-1.04666	-0.151505	-13.6634	1.03198e-08	4.19102e-05	10.5839	PSME3	10197
238953_at	-1.6351	-0.508534	-13.6279	1.06304e-08	4.27896e-05	10.5551	SP2-AS1
211985_s_at	-1.99274	-0.643435	-13.6129	1.07644e-08	4.29488e-05	10.5429	CALM1	801, 805
208078_s_at	1.43149	0.488838	13.5722	1.11389e-08	4.40565e-05	10.5096	SIK1,	150094, 102724428
1554080_at	-1.18664	-0.237958	-13.5512	1.13367e-08	4.44525e-05	10.4924	CNOT9	9125
206037_at	1.68966	0.438639	13.5194	1.16444e-08	4.52686e-05	10.4663	KYAT1	883
218995_s_at	-1.9931	-0.42101	-13.4901	1.19357e-08	4.5812e-05	10.4423	EDN1	1906
210683_at	1.38756	0.444542	13.467	1.21707e-08	4.5812e-05	10.4232	NRTN	4902
226663_at	1.6003	0.295032	13.4543	1.23027e-08	4.5812e-05	10.4127	ANKRD10-IT1
205530_at	1.19617	0.485282	13.4465	1.23839e-08	4.5812e-05	10.4063	ETFDH	2110
219305_x_at	1.28997	0.39852	13.4413	1.24384e-08	4.5812e-05	10.402	FBXO2	26232
216594_x_at	2.89444	1.34704	13.4366	1.24881e-08	4.5812e-05	10.3981	AKR1C1, AKR1C2	1645, 1646
205031_at	1.4171	0.383561	13.4365	1.24892e-08	4.5812e-05	10.3981	EFNB3	1949
51146_at	1.11807	0.232796	13.4058	1.2819e-08	4.64335e-05	10.3726	PIGV	55650
202690_s_at	-1.1059	-0.32575	-13.4017	1.28628e-08	4.64335e-05	10.3693	SNRPD1	6632
205139_s_at	1.47048	0.386711	13.3711	1.32017e-08	4.69517e-05	10.3439	UST	10090
226066_at	1.12987	0.397215	13.3702	1.32128e-08	4.69517e-05	10.3431	MITF	4286
223384_s_at	1.34697	0.449493	13.3436	1.35146e-08	4.76518e-05	10.321	TRIM4	89122
224984_at	1.27962	0.218733	13.3199	1.37906e-08	4.80788e-05	10.3013	, NFAT5	10725
203126_at	1.39377	0.362649	13.3152	1.38471e-08	4.80788e-05	10.2973	IMPA2	3613
231166_at	1.18277	0.212276	13.2847	1.42121e-08	4.88236e-05	10.2719	GPR155	151556
207574_s_at	1.28023	0.744	13.2795	1.42763e-08	4.88236e-05	10.2675	GADD45B	4616
33494_at	1.05274	0.450776	13.2648	1.44566e-08	4.90714e-05	10.2552	ETFDH	2110
243704_at	-1.38504	-0.377182	-13.1643	1.57618e-08	5.31054e-05	10.1706	GPATCH2	55105
206214_at	1.21328	0.262141	13.1221	1.63464e-08	5.46702e-05	10.135	PLA2G7	7941
202342_s_at	1.20525	0.444522	13.107	1.65609e-08	5.49833e-05	10.1222	TRIM2	23321
202691_at	-1.01642	-0.375895	-13.0951	1.67324e-08	5.51499e-05	10.1121	SNRPD1	6632
45288_at	1.17591	0.452299	13.0689	1.7118e-08	5.60149e-05	10.0898	ABHD6	57406
214211_at	2.33322	0.551361	13.0497	1.74053e-08	5.6364e-05	10.0735	FTH1	2495
229797_at	1.34812	0.204451	13.0442	1.7489e-08	5.6364e-05	10.0688	MCOLN3	55283
33307_at	-1.07165	-0.234461	-13.0372	1.75964e-08	5.6364e-05	10.0628	RRP7A, RRP7BP	27341, 91695
1553510_s_at	-0.924998	-0.225001	-13.0285	1.77289e-08	5.63913e-05	10.0554	CNOT9	9125
213183_s_at	1.84381	0.646491	12.9962	1.82356e-08	5.75607e-05	10.0278
223251_s_at	1.17632	0.21779	12.9866	1.83895e-08	5.75607e-05	10.0195	ANKRD10	55608
205739_x_at	-2.02233	-0.496438	-12.9812	1.84762e-08	5.75607e-05	10.0149	ZNF107	51427
236656_s_at	1.04883	0.253491	12.9598	1.88252e-08	5.81284e-05	9.99657
211653_x_at	3.12023	1.3869	12.9498	1.89898e-08	5.81284e-05	9.98803	AKR1C1, AKR1C2	1645, 1646
224840_at	-1.17189	-0.245909	-12.9403	1.91489e-08	5.81284e-05	9.97984	FKBP5	2289
205061_s_at	-1.06004	-0.242148	-12.9391	1.91696e-08	5.81284e-05	9.97878	EXOSC9	5393
226189_at	2.44742	0.55596	12.9038	1.97713e-08	5.8953e-05	9.94844	ITGB8	3696
224826_at	-1.30959	-0.159649	-12.8942	1.99385e-08	5.8953e-05	9.94017	GPCPD1	56261
241754_at	-1.01389	-0.143453	-12.8938	1.99455e-08	5.8953e-05	9.93982	SCAI	286205
213348_at	1.30354	0.434723	12.8867	2.007e-08	5.8953e-05	9.93371	CDKN1C	1028
236175_at	1.86597	0.457122	12.8856	2.00896e-08	5.8953e-05	9.93275	TRIM55	84675
206907_at	1.28284	0.602719	12.8485	2.07566e-08	6.02482e-05	9.90067	TNFSF9	8744
1555385_at	1.58115	0.390003	12.8404	2.09061e-08	6.02482e-05	9.89362	B4GALNT1	2583
224966_s_at	-0.971162	-0.0827947	-12.8392	2.09283e-08	6.02482e-05	9.89257	DUS3L	56931
205909_at	-1.29917	-0.322925	-12.8205	2.1275e-08	6.08611e-05	9.87642	POLE2	5427
223078_s_at	-1.24074	-0.198911	-12.8005	2.16555e-08	6.11574e-05	9.859	TMOD3	29766
226060_at	-0.95714	-0.234936	-12.7976	2.17112e-08	6.11574e-05	9.85647	RFT1	91869
201694_s_at	-4.04226	-0.907087	-12.7939	2.1782e-08	6.11574e-05	9.85327	EGR1	1958
230766_at	-1.22145	-0.359541	-12.7654	2.23379e-08	6.21181e-05	9.82849
217678_at	2.1179	0.770008	12.7618	2.24096e-08	6.21181e-05	9.82534	SLC7A11	23657
229181_s_at	-1.32582	-0.258981	-12.7556	2.25339e-08	6.21181e-05	9.8199	HAUS2	55142
201739_at	-2.05988	-0.369966	-12.7342	2.29651e-08	6.25743e-05	9.80125	SGK1	6446
50965_at	1.63409	0.336001	12.7338	2.29745e-08	6.25743e-05	9.80085	RAB26	25837
235783_at	-1.43213	-0.261924	-12.6648	2.44298e-08	6.48396e-05	9.74039	MRTO4	51154
226560_at	1.34116	0.37384	12.658	2.4577e-08	6.48396e-05	9.73447	SGPP2	130367
32209_at	1.09342	0.33784	12.6573	2.45932e-08	6.48396e-05	9.73383	SSSCA1, FAM89B	10534, 23625
1554271_a_at	-1.31929	-0.397781	-12.651	2.47319e-08	6.48396e-05	9.72829	CENPL	91687
210087_s_at	-0.970971	-0.18183	-12.6477	2.48057e-08	6.48396e-05	9.72535	MPZL1	9019
220012_at	1.08435	0.500183	12.6472	2.48165e-08	6.48396e-05	9.72492	ERO1B	56605
219258_at	-1.62015	-0.364264	-12.6414	2.49448e-08	6.48396e-05	9.71985	TIPIN	54962
215983_s_at	-1.59813	-0.357322	-12.6413	2.49466e-08	6.48396e-05	9.71977	UBXN8	7993
231035_s_at	1.72149	0.339589	12.6184	2.5464e-08	6.5592e-05	9.69955
227458_at	-2.67155	-0.611445	-12.6157	2.55245e-08	6.5592e-05	9.69721	CD274	29126
203313_s_at	1.01673	0.296386	12.5966	2.59643e-08	6.63474e-05	9.68038	TGIF1	7050
1552739_s_at	-1.47972	-0.357501	-12.5851	2.62342e-08	6.66626e-05	9.67019	ST7L	54879
206554_x_at	-1.62065	-0.397782	-12.5488	2.71043e-08	6.84908e-05	9.63802	SETMAR	6419
206079_at	-1.25422	-0.456777	-12.5411	2.72931e-08	6.85124e-05	9.63117	CHML	1122
207850_at	-2.40529	-0.820539	-12.5362	2.74141e-08	6.85124e-05	9.62681	CXCL3	2921
227443_at	3.27169	0.966823	12.5181	2.78635e-08	6.90858e-05	9.61078	LURAP1L	286343
204201_s_at	1.28741	0.281147	12.5148	2.79473e-08	6.90858e-05	9.60781	PTPN13	5783
221290_s_at	-1.0993	-0.256442	-12.4982	2.83692e-08	6.94549e-05	9.59303	MUM1	84939
220865_s_at	-1.44307	-0.221668	-12.4969	2.8402e-08	6.94549e-05	9.59189	PDSS1	23590
201323_at	-1.06675	-0.264637	-12.4826	2.87704e-08	6.97752e-05	9.57918	EBNA1BP2	10969, 102465439
213924_at	1.38953	0.263	12.476	2.89429e-08	6.97752e-05	9.57328	GNAL	2774
230927_at	-1.30082	-0.450574	-12.4741	2.89932e-08	6.97752e-05	9.57156
243880_at	1.38746	0.439696	12.4585	2.94041e-08	7.00728e-05	9.55767	GOSR2	9570
235205_at	1.18914	0.459677	12.4577	2.9425e-08	7.00728e-05	9.55697
206785_s_at	2.45288	0.184218	12.4504	2.96212e-08	7.01728e-05	9.55041	KLRC1, KLRC2	3821, 3822
222443_s_at	-0.87423	-0.147166	-12.4375	2.99685e-08	7.06113e-05	9.5389	RBM8B, RBM8A	9939
231332_at	1.97018	0.586048	12.4321	3.01168e-08	7.06113e-05	9.53403
226811_at	1.45635	0.639744	12.4246	3.03235e-08	7.07312e-05	9.52728	FAM46C	54855
239533_at	1.3056	0.354601	12.4188	3.04815e-08	7.0737e-05	9.52214	GPR155	151556
216870_x_at	-1.8977	-0.54719	-12.3844	3.14492e-08	7.26123e-05	9.49127	DLEU2, DLEU2L	406948
205015_s_at	-1.88855	-0.194511	-12.3737	3.17585e-08	7.29561e-05	9.4816	TGFA	7039
45714_at	2.56819	0.53107	12.3667	3.19598e-08	7.30496e-05	9.47536	HCFC1R1	54985
233496_s_at	-1.34428	-0.272828	-12.348	3.25114e-08	7.38579e-05	9.45845	CFL2	1073
205141_at	1.37054	0.39764	12.3437	3.26382e-08	7.38579e-05	9.4546	ANG	283
222804_x_at	1.14817	0.364231	12.3274	3.31272e-08	7.45932e-05	9.4399	DCAF10	79269
215165_x_at	-1.06123	-0.191158	-12.3155	3.34913e-08	7.49049e-05	9.4291	UMPS	7372
228238_at	-1.17327	-0.334867	-12.301	3.39377e-08	7.49049e-05	9.416	GAS5	60674
227088_at	1.1934	0.284382	12.2986	3.40117e-08	7.49049e-05	9.41385	PDE5A	8654
229385_s_at	1.69948	0.431881	12.2893	3.43039e-08	7.49049e-05	9.40539	TINCR
218282_at	1.17295	0.287812	12.2798	3.46024e-08	7.49049e-05	9.39682	EDEM2	55741
205158_at	1.22485	0.394458	12.2761	3.47192e-08	7.49049e-05	9.39349	RNASE4, , ANG	6038, 283
205969_at	-1.39295	0.0479445	-12.2735	3.48017e-08	7.49049e-05	9.39114	AADAC	13
205992_s_at	1.44335	0.325525	12.2714	3.4869e-08	7.49049e-05	9.38923	IL15	3600
219020_at	0.970706	0.269866	12.2712	3.4876e-08	7.49049e-05	9.38903	HS1BP3	64342
244804_at	1.55408	0.316835	12.2701	3.49124e-08	7.49049e-05	9.388	SQSTM1	8878
239210_at	1.24857	0.21743	12.2558	3.53715e-08	7.55337e-05	9.37507
225171_at	-1.18296	-0.480528	-12.2488	3.56017e-08	7.56699e-05	9.36866	ARHGAP18	93663
208546_x_at	-1.7161	-0.411863	-12.2382	3.5949e-08	7.60527e-05	9.35905	HIST1H2BH	8345
204608_at	-1.03082	-0.238678	-12.2309	3.61927e-08	7.62138e-05	9.35236	, ASL	435
203856_at	-0.895305	-0.237824	-12.2118	3.68331e-08	7.70485e-05	9.335	VRK1	7443
217809_at	-0.899121	-0.251716	-12.209	3.69279e-08	7.70485e-05	9.33246	BZW2	28969
1558164_s_at	1.41319	0.353291	12.2002	3.72283e-08	7.73206e-05	9.32444	PEX13	5194
230934_at	1.0471	0.34666	12.1849	3.77583e-08	7.80037e-05	9.31044	STK32C	282974
230728_at	1.16051	0.295174	12.1808	3.79001e-08	7.80037e-05	9.30673	FKBP14	55033
208672_s_at	-1.27553	-0.465684	-12.1656	3.84356e-08	7.85253e-05	9.29283	SRSF3	6428
208216_at	2.22219	0.534004	12.1638	3.84988e-08	7.85253e-05	9.29121	DLX4	1748
229001_at	1.09123	0.242987	12.1367	3.9476e-08	8.01589e-05	9.26638	PPP1R3E	90673
225540_at	1.51075	0.568976	12.1243	3.99349e-08	8.07303e-05	9.25493	MAP2	4133
231991_at	1.22474	0.341662	12.1082	4.05326e-08	8.1576e-05	9.24021	CCM2L	140706
236691_at	-1.04902	-0.463308	-12.0855	4.13974e-08	8.23292e-05	9.21928
243918_at	1.72771	0.74908	12.0855	4.13978e-08	8.23292e-05	9.21927	KLHL24	54800
232105_at	1.6525	0.723142	12.0816	4.15475e-08	8.23292e-05	9.21569	BLACAT1
229828_at	1.00034	0.146711	12.0795	4.16308e-08	8.23292e-05	9.21371	CDC73	79577
204849_at	0.912187	0.187167	12.0691	4.20352e-08	8.24682e-05	9.20412	TCFL5	10732
223217_s_at	-2.23732	-0.797801	-12.0683	4.20637e-08	8.24682e-05	9.20345	NFKBIZ	64332
243931_at	-1.04633	-0.200891	-12.0269	4.37184e-08	8.52284e-05	9.16519
219037_at	-1.15895	-0.231116	-12.0197	4.40138e-08	8.52284e-05	9.15851	RRP15	51018
209024_s_at	-0.943636	-0.249708	-12.017	4.41253e-08	8.52284e-05	9.156	, SYNCRIP	10492
214126_at	1.12465	0.309818	12.0147	4.42211e-08	8.52284e-05	9.15385
202706_s_at	-1.09745	-0.186358	-12.0092	4.44462e-08	8.53008e-05	9.14881	UMPS	7372
210512_s_at	1.27009	0.27909	11.9961	4.49954e-08	8.58722e-05	9.13663	VEGFA	7422
206118_at	1.91848	0.494601	11.9922	4.51608e-08	8.58722e-05	9.13298	STAT4	6775
233011_at	-1.22206	-0.222635	-11.9886	4.53103e-08	8.58722e-05	9.1297
213594_x_at	-1.01576	-0.328091	-11.974	4.59356e-08	8.62812e-05	9.1161	SRSF10	10772
235556_at	1.09185	0.247359	11.9684	4.61756e-08	8.62812e-05	9.11093	CREBRF	153222
227962_at	1.06137	0.371824	11.9669	4.62401e-08	8.62812e-05	9.10955	ACOX1	51
219960_s_at	-0.828052	-0.196391	-11.9659	4.62849e-08	8.62812e-05	9.10858	UCHL5	51377
230624_at	1.43789	0.315202	11.9589	4.65901e-08	8.64956e-05	9.10206	SLC25A27	9481
1568812_at	1.58558	0.512773	11.9488	4.7033e-08	8.68174e-05	9.09267		100507140
225310_at	-1.1245	-0.455123	-11.9463	4.71452e-08	8.68174e-05	9.0903	RBMX	27316
219638_at	-0.978625	-0.177616	-11.9404	4.7404e-08	8.6942e-05	9.08487	FBXO22	26263
224397_s_at	1.14046	0.495692	11.9313	4.78107e-08	8.73358e-05	9.07638	TMTC1	83857
203217_s_at	0.926462	0.23023	11.9157	4.85175e-08	8.82725e-05	9.06181	ST3GAL5	8869
223376_s_at	0.856369	0.157705	11.8794	5.02069e-08	9.09823e-05	9.02781	BRI3	25798
34408_at	1.29811	0.431469	11.8702	5.06448e-08	9.10643e-05	9.01918	RTN2	6253
226271_at	-0.905675	-0.248183	-11.87	5.06526e-08	9.10643e-05	9.01903	GDAP1	54332
208763_s_at	1.19474	0.213998	11.8312	5.25431e-08	9.34942e-05	8.98261	TSC22D3	1831
218875_s_at	-1.25572	-0.587349	-11.8282	5.26967e-08	9.34942e-05	8.97971	FBXO5	26271
201016_at	-1.11336	-0.30859	-11.8266	5.27737e-08	9.34942e-05	8.97826	EIF1AXP1, EIF1AX	1964
204469_at	-1.85483	-0.0842838	-11.8256	5.28264e-08	9.34942e-05	8.97727	PTPRZ1	5803
1554594_at	-1.45929	-0.208323	-11.7964	5.43041e-08	9.57369e-05	8.94984	ARHGAP27	201176
1555606_a_at	1.34009	0.466773	11.7856	5.48651e-08	9.63525e-05	8.93962	GDPD1	284161
1552301_a_at	1.39469	0.454931	11.7688	5.57497e-08	9.75294e-05	8.92371	CORO6	84940
1553400_a_at	1.37751	0.453858	11.7554	5.64636e-08	9.82776e-05	8.91105	CRHR1-IT1	147081, 401884
221552_at	0.905264	0.341409	11.7488	5.68181e-08	9.82776e-05	8.90482	ABHD6	57406
222896_at	1.23807	0.313685	11.7487	5.68255e-08	9.82776e-05	8.90469	TMEM38A	79041
225716_at	-0.855356	-0.491227	-11.7175	5.85385e-08	0.000100669	8.87514	BRI3BP	140707
205441_at	1.02722	0.242434	11.7155	5.86512e-08	0.000100669	8.87322	OCEL1	79629
219212_at	-1.01761	-0.212555	-11.7029	5.93601e-08	0.000101143	8.86127	HSPA14	51182
232810_at	-1.0778	-0.333771	-11.7027	5.93718e-08	0.000101143	8.86107	AIG1	51390
1555216_a_at	1.22495	0.294131	11.6939	5.9873e-08	0.000101419	8.8527	TBX2-AS1	103689912
230679_at	1.38035	0.409188	11.6898	6.01088e-08	0.000101419	8.84879	DCAF10	79269
236935_at	1.56423	0.311349	11.6882	6.0203e-08	0.000101419	8.84723	PTPN4	5775
205024_s_at	-1.26351	-0.321148	-11.6807	6.06363e-08	0.000101772	8.84009	RAD51	5888
203827_at	1.3062	0.372779	11.6693	6.13001e-08	0.000102508	8.82925	WIPI1	55062
238802_at	0.989319	0.250397	11.652	6.23239e-08	0.000103581	8.81275	TYSND1	219743
223035_s_at	-0.935839	-0.218848	-11.6508	6.23971e-08	0.000103581	8.81158	FARSB	10056
221868_at	0.892735	0.274459	11.6464	6.26576e-08	0.00010361	8.80743	PAIP2B	400961
203640_at	2.07264	0.275878	11.6429	6.28703e-08	0.00010361	8.80406	MBNL2	10150
236692_at	-1.02759	-0.36602	-11.6137	6.46581e-08	0.000106172	8.77612
235459_at	1.52475	0.442454	11.6056	6.51658e-08	0.000106621	8.76833	RNF41	10193
226936_at	-0.931746	-0.310948	-11.5657	6.77158e-08	0.000110165	8.73007	CENPW	387103
219990_at	-1.31349	-0.428414	-11.5642	6.78167e-08	0.000110165	8.72859	E2F8	79733
236668_at	1.23011	0.349023	11.5524	6.85892e-08	0.000110691	8.7173
206173_x_at	-0.966877	-0.213665	-11.5475	6.89195e-08	0.000110691	8.71251	GABPB1	2553, 55056
238686_at	-1.094	-0.194986	-11.5463	6.89966e-08	0.000110691	8.71139	FBXO3	26273
208926_at	1.56221	0.395972	11.5445	6.91137e-08	0.000110691	8.7097	NEU1	4758
206034_at	-1.26754	-0.146648	-11.5273	7.02736e-08	0.000112154	8.69311	SERPINB8	5271
37547_at	1.58956	0.224901	11.5085	7.15628e-08	0.000113731	8.67497	BBS9	27241
212230_at	1.27627	0.204935	11.5046	7.18371e-08	0.000113731	8.67116	PLPP3	8613
203775_at	-1.30845	-0.366074	-11.5021	7.20122e-08	0.000113731	8.66873	SLC25A13	10165
225173_at	-1.31696	-0.485266	-11.491	7.2788e-08	0.000114559	8.65804	ARHGAP18	93663
222705_s_at	-1.02709	-0.233216	-11.4861	7.3138e-08	0.000114713	8.65325	SLC25A15	10166
235916_at	1.31395	0.408614	11.4783	7.36929e-08	0.000115038	8.64571	YPEL4	219539
216548_x_at	-0.927593	-0.38759	-11.4756	7.3883e-08	0.000115038	8.64314	HMGB3P1
203390_s_at	1.37072	0.470692	11.4726	7.41038e-08	0.000115038	8.64016	KIF3C	3797
209240_at	0.919592	0.229173	11.4524	7.55729e-08	0.000116798	8.62057	OGT	8473
231944_at	1.10906	0.312681	11.45	7.57512e-08	0.000116798	8.61822	ERO1B	56605
223315_at	1.73676	0.251382	11.4234	7.77363e-08	0.000119453	8.5924	NTN4	59277
229264_at	1.34088	0.305821	11.4098	7.87742e-08	0.000119755	8.57915
202923_s_at	0.891546	0.292881	11.4074	7.8957e-08	0.000119755	8.57684	GCLC	2729
219366_at	-0.946192	-0.197677	-11.4057	7.90923e-08	0.000119755	8.57513	AVEN	57099
200875_s_at	-1.15152	-0.271126	-11.4044	7.91863e-08	0.000119755	8.57394	NOP56	10528, 100302138
235737_at	2.03352	0.519487	11.4036	7.92492e-08	0.000119755	8.57315	TSLP	85480
218983_at	1.60088	0.324598	11.3858	8.06437e-08	0.000121274	8.55573	C1RL	51279
1552738_a_at	-1.16694	-0.13724	-11.384	8.07871e-08	0.000121274	8.55396	ST7L	54879
203657_s_at	0.932415	0.218055	11.3663	8.2193e-08	0.000122574	8.53672	CTSF	8722
200753_x_at	-1.49295	-0.440356	-11.3633	8.24383e-08	0.000122574	8.53375	SRSF2	6427, 693221
226998_at	-0.96751	-0.292278	-11.363	8.2462e-08	0.000122574	8.53346	NAA15	80155
53720_at	1.1573	0.276461	11.3551	8.3102e-08	0.000123123	8.52574	C19orf66	55337
227062_at	2.27815	0.374079	11.3448	8.39413e-08	0.000123963	8.5157	NEAT1	283131, 693197
204459_at	-0.78888	-0.153731	-11.337	8.45932e-08	0.000124521	8.50796	CSTF2	1478
204748_at	-2.26102	-0.286551	-11.3283	8.53155e-08	0.000125179	8.49947	PTGS2	5743
200615_s_at	-0.946945	-0.278413	-11.3231	8.57504e-08	0.000125413	8.49439	AP2B1	163
220688_s_at	-1.20173	-0.214521	-11.3156	8.63815e-08	0.000125931	8.48706	MRTO4	51154
221085_at	1.72695	0.679886	11.2819	8.92945e-08	0.0001294	8.4539	TNFSF15	9966
200810_s_at	-1.48622	-0.387239	-11.2815	8.93297e-08	0.0001294	8.45351	CIRBP	1153
226931_at	1.92324	0.442897	11.2078	9.60782e-08	0.000138301	8.38067	TMTC1	83857
222514_at	0.955491	0.329918	11.2047	9.63705e-08	0.000138301	8.37763	RRAGC,	64121
232158_x_at	-1.21497	-0.176165	-11.1965	9.71639e-08	0.000138301	8.36942	NIPAL1	152519
212779_at	0.898569	0.197566	11.1963	9.7184e-08	0.000138301	8.36921	KIAA1109	84162
202903_at	-0.973314	-0.372819	-11.196	9.72048e-08	0.000138301	8.369	LSM5	23658
1554794_a_at	-1.42825	-0.181611	-11.1951	9.72992e-08	0.000138301	8.36803	UBE3C	9690
242710_at	1.13718	0.311561	11.1823	9.85426e-08	0.000139632	8.35532
216212_s_at	-0.832543	-0.296751	-11.1671	1.00034e-07	0.000140703	8.34029	DKC1	1736, 100847052
219534_x_at	1.26097	0.400439	11.1671	1.00042e-07	0.000140703	8.3402	CDKN1C	1028
223096_at	-1.08166	-0.303407	-11.1646	1.00282e-07	0.000140703	8.3378	NOP58	51602
235990_at	1.1827	0.254667	11.1608	1.0067e-07	0.000140703	8.33394
229720_at	1.04138	0.300573	11.159	1.00845e-07	0.000140703	8.33221	BAG1	573
227545_at	-1.17624	-0.414305	-11.1549	1.01258e-07	0.00014083	8.32811	BARD1	580
219263_at	2.92885	0.802434	11.1497	1.01784e-07	0.00014083	8.32292	RNF128	79589
1557321_a_at	1.4234	0.249061	11.1489	1.01865e-07	0.00014083	8.32213	CAPN14	440854
212956_at	1.25588	0.268824	11.1401	1.02764e-07	0.000141294	8.31333	TBC1D9	23158
200754_x_at	-1.34739	-0.421575	-11.1395	1.02822e-07	0.000141294	8.31277	SRSF2	6427, 693221
228243_at	1.05605	0.219493	11.1354	1.03247e-07	0.000141452	8.30863
232004_at	0.954831	0.268047	11.0972	1.07255e-07	0.000146501	8.27049	HNRNPR	10236
212646_at	-1.20101	-0.350958	-11.0888	1.08153e-07	0.000147286	8.26214	RFTN1	23180
212174_at	-1.38859	-0.426185	-11.0852	1.08541e-07	0.000147372	8.25855	AK2	204
201577_at	-0.935117	-0.246769	-11.0806	1.09048e-07	0.000147391	8.25388	NME1-NME2, NME1	654364, 4830
224368_s_at	0.859663	0.0956234	11.0792	1.09203e-07	0.000147391	8.25246	NDRG3	57446
202481_at	1.20612	0.015036	11.0503	1.12401e-07	0.000151259	8.22353	DHRS3	9249
221698_s_at	2.10144	0.515649	11.0373	1.13878e-07	0.00015278	8.21045	CLEC7A	64581
204519_s_at	0.977933	0.402786	11.0345	1.14203e-07	0.00015278	8.20759	PLLP	51090
217906_at	0.830928	0.254629	11.0292	1.14806e-07	0.000152929	8.20232	KLHDC2	23588
235512_at	-1.25638	-0.0988965	-11.0277	1.14987e-07	0.000152929	8.20074	CDKL1	8814
201959_s_at	0.860267	0.149929	11.0166	1.16271e-07	0.000154185	8.18961	MYCBP2	23077
217808_s_at	-0.829422	-0.134134	-11.0136	1.16624e-07	0.000154204	8.18657	MAPKAP1	79109
224714_at	-0.920717	-0.189763	-11.0101	1.1703e-07	0.000154293	8.18308	NIFK	84365
212096_s_at	2.03677	0.178216	10.9802	1.20613e-07	0.000158557	8.15284	MTUS1	57509
204552_at	1.21263	0.246784	10.9692	1.21956e-07	0.000159679	8.14174	INPP4A	3631
223413_s_at	-0.938498	-0.190009	-10.9675	1.22169e-07	0.000159679	8.13999	LYAR	55646
221963_x_at	-1.33589	-0.293176	-10.9623	1.22809e-07	0.000160056	8.13475	ZNF587B	100293516
1570124_at	0.937591	0.338988	10.9578	1.23363e-07	0.000160319	8.13023	SLC29A4	222962
203124_s_at	1.13029	0.235176	10.9498	1.24364e-07	0.000161025	8.12213	SLC11A2	4891
210563_x_at	-1.28391	-0.363325	-10.9451	1.24962e-07	0.000161025	8.11731	CFLAR	8837
226656_at	1.14357	0.18203	10.9439	1.25115e-07	0.000161025	8.11608	CRTAP	10491
235634_at	1.34605	0.443196	10.941	1.25477e-07	0.000161025	8.11319	PURG	29942
227412_at	1.30622	0.312537	10.9364	1.26057e-07	0.000161025	8.10856	PPP1R3E	90673
40837_at	1.18098	0.284765	10.9347	1.2628e-07	0.000161025	8.10679	TLE2	7089
206857_s_at	1.16787	0.403418	10.9339	1.26385e-07	0.000161025	8.10596	FKBP1B, MFSD2B	2281, 388931
219461_at	1.74599	0.439503	10.9286	1.27058e-07	0.000161431	8.10062	, PAK6	106821730, 56924
236400_at	1.30496	0.257754	10.9116	1.29263e-07	0.000163343	8.08336	IDH1-AS1	100507475
205345_at	-1.0465	-0.392269	-10.9115	1.29281e-07	0.000163343	8.08322	BARD1	580
213164_at	1.05193	0.14282	10.9036	1.30313e-07	0.000164191	8.07524	SLC5A3	6526
203662_s_at	1.35219	0.447963	10.8804	1.33421e-07	0.000167374	8.05158	TMOD1	7111
230494_at	1.91593	0.395592	10.8792	1.33576e-07	0.000167374	8.05042	SLC20A1	6574
218564_at	-0.939275	-0.258655	-10.8756	1.34068e-07	0.00016753	8.04672	RFWD3	55159
210867_at	1.19278	0.236121	10.8483	1.37847e-07	0.00017178	8.01882	CNOT4	4850
202854_at	-0.838582	-0.261826	-10.8443	1.38403e-07	0.000172001	8.01478	HPRT1	3251
214240_at	-1.20956	-0.209787	-10.8388	1.3919e-07	0.000172508	8.00908	GAL	51083
230822_at	1.2862	0.365618	10.8337	1.39905e-07	0.000172923	8.00393	TMEM61	199964
217371_s_at	1.41019	0.30858	10.8227	1.41491e-07	0.000174183	7.99261	IL15	3600
220399_at	0.924301	0.370409	10.8213	1.41691e-07	0.000174183	7.9912	LINC00115,	79854
210253_at	0.882302	0.276725	10.815	1.42608e-07	0.000174838	7.98472	HTATIP2	10553
204781_s_at	-1.00386	-0.318665	-10.8112	1.4316e-07	0.000175013	7.98083	FAS	355
237075_at	1.33811	0.505138	10.8086	1.43543e-07	0.000175013	7.97815
213365_at	-1.0158	-0.342486	-10.806	1.43925e-07	0.000175013	7.97548	ERI2	112479
210310_s_at	-1.22804	-0.193696	-10.8035	1.4429e-07	0.000175013	7.97294	FGF5	2250
239406_at	-1.19792	-0.224646	-10.7892	1.46413e-07	0.000177116	7.95826	ZSCAN9	7746
210544_s_at	0.884387	0.225489	10.7831	1.47322e-07	0.000177744	7.95204	ALDH3A2	224
202937_x_at	-1.16747	-0.236	-10.7753	1.48506e-07	0.000178521	7.944	RRP7A	27341
241689_at	0.96499	0.378273	10.7737	1.48751e-07	0.000178521	7.94234	METTL14	57721
226267_at	0.979602	-0.0275392	10.7709	1.49177e-07	0.00017856	7.93947	JDP2	122953
219238_at	0.876695	0.125845	10.7616	1.50607e-07	0.000179799	7.92988	PIGV	55650
227230_s_at	1.45031	0.339276	10.755	1.51623e-07	0.000180538	7.92312	KIAA1211	57482
203664_s_at	-1.07813	-0.192547	-10.749	1.52564e-07	0.00018084	7.91691	, POLR2D	5433
238549_at	0.990661	0.222949	10.7483	1.52672e-07	0.00018084	7.9162	CBFA2T2	9139
212175_s_at	-0.956418	-0.279152	-10.7399	1.53994e-07	0.000181933	7.90753	AK2,	204
218782_s_at	-0.886541	-0.295864	-10.7272	1.56014e-07	0.000183842	7.89443	ATAD2	29028
220334_at	1.05732	0.464216	10.7024	1.60046e-07	0.000188105	7.86877	RGS17	26575
223830_s_at	1.27327	0.359366	10.6985	1.60683e-07	0.000188367	7.86478	TRIM5	85363
213836_s_at	1.1917	0.400214	10.6913	1.6188e-07	0.000189061	7.85731	WIPI1	55062
236984_at	-1.35462	-0.334276	-10.69	1.62106e-07	0.000189061	7.85591	C4orf26	152816
238767_at	1.15604	0.137222	10.6804	1.63715e-07	0.000190014	7.84598
226372_at	1.76747	0.460788	10.6801	1.63759e-07	0.000190014	7.84571	CHST11	50515
212613_at	0.82669	-0.0828684	10.6648	1.66376e-07	0.000191804	7.82976	BTN3A2	11118
239086_at	-0.933857	-0.321381	-10.6639	1.6652e-07	0.000191804	7.82889
228742_at	0.973646	0.466986	10.6637	1.66567e-07	0.000191804	7.82861
234192_s_at	1.20972	0.282797	10.6523	1.6853e-07	0.000193199	7.81682	GKAP1	80318
203622_s_at	-1.01611	-0.234887	-10.6515	1.68671e-07	0.000193199	7.81598	PNO1	56902
229981_at	-1.29152	-0.439675	-10.6493	1.69052e-07	0.000193199	7.81371	SNX5	27131
217540_at	1.14295	0.321811	10.6449	1.69829e-07	0.0001936	7.80909	NXPE3	91775
212122_at	1.21751	0.154414	10.628	1.7282e-07	0.000195786	7.79153	RHOQ	23433
1558871_at	0.99517	0.312026	10.6269	1.73022e-07	0.000195786	7.79035
201890_at	-1.49723	-0.462195	-10.6268	1.73038e-07	0.000195786	7.79026	RRM2	6241
1562102_at	1.83859	1.39996	10.6235	1.73633e-07	0.000195972	7.7868
218938_at	0.847035	0.277728	10.6175	1.74712e-07	0.000196701	7.78057	FBXL15	79176
214023_x_at	1.9295	0.469077	10.6002	1.77874e-07	0.000199768	7.76252	TUBB2B	347733
1552546_a_at	-1.88704	-0.20157	-10.5904	1.79688e-07	0.000200831	7.7523	LETM2	137994
202922_at	0.937366	0.281135	10.5897	1.79818e-07	0.000200831	7.75158	GCLC	2729
1554522_at	1.32545	0.372568	10.5876	1.80223e-07	0.000200831	7.74931	CNNM2	54805
1554445_at	-1.02847	-0.190495	-10.5856	1.8059e-07	0.000200831	7.74726	ZNF85	7639
223839_s_at	1.24561	0.092309	10.5833	1.81029e-07	0.000200831	7.74482
219078_at	-1.50185	-0.34898	-10.5682	1.83891e-07	0.000203509	7.72903	GPATCH2	55105
201693_s_at	-3.33117	-0.842682	-10.5653	1.84448e-07	0.000203631	7.72598	EGR1	1958
202352_s_at	-0.792713	-0.10462	-10.5628	1.8492e-07	0.000203657	7.72341	PSMD12	5718
223181_at	-0.896428	-0.212126	-10.5591	1.85636e-07	0.000203953	7.71952	TIMM21	29090
223459_s_at	1.12375	0.411321	10.5499	1.8742e-07	0.000205416	7.70989	C1orf56	54964
212484_at	1.08259	0.274701	10.5342	1.90503e-07	0.000208293	7.69345	SSSCA1, FAM89B	10534, 23625
226425_at	1.43603	0.25337	10.5291	1.91533e-07	0.000208918	7.68802	CLIP4	79745
209504_s_at	1.56102	0.453739	10.5266	1.92037e-07	0.000208939	7.68538	PLEKHB1	58473
212335_at	0.856048	0.301858	10.5244	1.92472e-07	0.000208939	7.6831	GNS	2799
223469_at	1.32347	0.497745	10.5211	1.9314e-07	0.000209165	7.67961	PGPEP1	54858
1557584_at	-1.01983	-0.426475	-10.5162	1.94121e-07	0.00020943	7.6745	, RN7SL832P
204546_at	1.00842	0.43862	10.5153	1.94305e-07	0.00020943	7.67355	KIAA0513	9764
229537_at	0.815038	0.198291	10.4894	1.99646e-07	0.000214677	7.64623	LMO4	8543
205593_s_at	0.913319	0.213926	10.4801	2.01596e-07	0.000216263	7.63644	PDE9A	5152
201202_at	-0.858915	-0.274545	-10.4749	2.02696e-07	0.000216932	7.63095	PCNA	5111
224523_s_at	-0.989598	-0.353575	-10.457	2.06535e-07	0.000220521	7.61205	CMSS1	84319
210203_at	0.944177	0.185481	10.4475	2.08607e-07	0.000222212	7.60198	CNOT4	4850
220663_at	1.46449	0.419935	10.4435	2.09477e-07	0.00022227	7.59779	IL1RAPL1	11141
205996_s_at	-1.37858	-0.401765	-10.4414	2.09937e-07	0.00022227	7.59558	AK2	204
224447_s_at	1.03606	0.230278	10.4406	2.10128e-07	0.00022227	7.59466	MIEN1	84299
226597_at	1.01532	0.116125	10.4182	2.15132e-07	0.000227036	7.57093	REEP6	92840
224856_at	-1.07415	-0.218304	-10.4155	2.15745e-07	0.000227155	7.56807	FKBP5	2289
226310_at	1.24251	0.336542	10.4124	2.1643e-07	0.000227351	7.56487	RICTOR	253260
204565_at	0.919777	0.210882	10.4031	2.18568e-07	0.000229068	7.55496	ACOT13	55856
1554997_a_at	-2.2355	-0.317316	-10.3866	2.22407e-07	0.000232313	7.5374	PTGS2	5743
204394_at	1.71562	0.383425	10.3854	2.22686e-07	0.000232313	7.53613	SLC43A1	8501
218350_s_at	-0.894877	-0.274593	-10.3657	2.27374e-07	0.00023666	7.51512	GMNN	51053
219562_at	2.20247	0.504681	10.3596	2.28835e-07	0.000237638	7.50866	RAB26	25837
229533_x_at	-0.869676	-0.168738	-10.3552	2.29896e-07	0.000238196	7.50399	ZNF680	340252
200699_at	0.9347	0.163421	10.3398	2.33689e-07	0.000241099	7.48748	KDELR2	11014
210299_s_at	1.17449	0.305547	10.3395	2.33759e-07	0.000241099	7.48718	FHL1	2273
220083_x_at	-1.13306	-0.303465	-10.3261	2.37109e-07	0.00024356	7.47282	UCHL5	51377
212177_at	0.90233	0.122273	10.3256	2.37215e-07	0.00024356	7.47237	PNISR	25957
1562019_at	2.11003	0.344958	10.323	2.37884e-07	0.000243697	7.46953	NT5DC4	284958
210594_x_at	-0.76279	-0.113978	-10.3133	2.40329e-07	0.000245648	7.45921	MPZL1	9019
222455_s_at	-0.828641	-0.313035	-10.3091	2.41424e-07	0.000246214	7.45462	PARVA	55742
212334_at	0.841169	0.161728	10.3063	2.42131e-07	0.000246382	7.45167	GNS	2799
244743_x_at	-1.65308	-0.386506	-10.2836	2.4805e-07	0.000251842	7.42729	ZNF138	7697
222483_at	-0.981891	-0.364114	-10.2789	2.49286e-07	0.000252378	7.42228	EFHD2	79180
225509_at	1.16311	0.017292	10.2769	2.49819e-07	0.000252378	7.42012	SAP30L	79685
236657_at	0.956516	0.326436	10.2748	2.50379e-07	0.000252378	7.41786
200904_at	0.932806	0.288192	10.2712	2.51332e-07	0.000252378	7.41402	HLA-E	3133
202370_s_at	-0.804008	-0.300455	-10.2711	2.51352e-07	0.000252378	7.41394	CBFB	865
214071_at	1.53101	0.296558	10.2625	2.53678e-07	0.000252985	7.40464	GNAL	2774
37408_at	1.05747	0.289092	10.2624	2.53709e-07	0.000252985	7.40452	MRC2	9902
226882_x_at	-1.09785	-0.318736	-10.2589	2.54641e-07	0.000252985	7.40082	WDR4	10785
205394_at	-0.799843	-0.224687	-10.2578	2.54936e-07	0.000252985	7.39965	CHEK1	1111
202341_s_at	1.163	0.385349	10.2557	2.55506e-07	0.000252985	7.39739	TRIM2	23321
219390_at	0.868243	0.312567	10.255	2.55704e-07	0.000252985	7.39661	FKBP14	55033
202619_s_at	-1.09481	-0.504365	-10.2545	2.55851e-07	0.000252985	7.39603	PLOD2	5352
203928_x_at	1.11296	0.359557	10.2405	2.59685e-07	0.00025574	7.38101	MAPT	4137
230815_at	0.72766	0.336783	10.2395	2.5997e-07	0.00025574	7.3799	, KIF27	55582
208920_at	-1.06396	-0.461239	-10.2382	2.60323e-07	0.00025574	7.37853	SRI	6717
203816_at	-0.905315	-0.294738	-10.2262	2.63689e-07	0.000258488	7.36556	DGUOK	1716
202780_at	-1.23499	-0.602744	-10.224	2.64309e-07	0.000258538	7.36319	OXCT1	5019
222016_s_at	2.7771	0.367442	10.2104	2.68186e-07	0.000261769	7.34847	ZSCAN31	64288
207723_s_at	1.55383	0.0679872	10.2065	2.69291e-07	0.000262221	7.34432	KLRC3,	3823
205938_at	1.43699	0.134843	10.2048	2.69803e-07	0.000262221	7.3424	PPM1E	22843
205667_at	-0.842789	-0.229674	-10.1964	2.7224e-07	0.000263846	7.33332	WRN	7486
230795_at	1.3476	0.3095	10.195	2.72635e-07	0.000263846	7.33185
236172_at	1.04939	0.214525	10.1926	2.73336e-07	0.000263962	7.32926	LTB4R	1241
1552921_a_at	-0.859506	-0.369411	-10.1831	2.76134e-07	0.0002661	7.31897	FIGNL1	63979
226374_at	0.762102	0.106388	10.1657	2.81327e-07	0.000270531	7.30014	CXADR	1525
204820_s_at	0.78634	-0.206421	10.1578	2.83728e-07	0.000272264	7.29155	BTN3A3, BTN3A2	10384, 11118
201014_s_at	-0.812948	-0.420475	-10.1361	2.90433e-07	0.000277914	7.26795	PAICS, PAICSP4	10606
225291_at	-0.737819	-0.284409	-10.1348	2.90838e-07	0.000277914	7.26654	PNPT1	87178
210111_s_at	0.851652	0.209438	10.1252	2.93861e-07	0.000280214	7.25609	KLHDC10	23008
214177_s_at	1.13804	0.264676	10.1229	2.94572e-07	0.000280304	7.25365	PBXIP1	57326
238909_at	-1.06019	-0.185812	-10.111	2.9838e-07	0.000283335	7.24066
226440_at	0.798639	0.355165	10.1026	3.01098e-07	0.000285321	7.23149	DUSP22	56940
1562020_s_at	1.56231	0.240958	10.098	3.02602e-07	0.00028615	7.22645	NT5DC4	284958
209753_s_at	-1.18672	-0.292264	-10.0931	3.0419e-07	0.000287054	7.22116	TMPO	7112
225019_at	0.968458	0.160046	10.0908	3.04955e-07	0.000287181	7.21862	CAMK2D	817
214855_s_at	0.929356	0.186423	10.0858	3.06595e-07	0.000288129	7.2132	RALGAPA1, RALGAPA1P1	253959
213397_x_at	1.32796	0.427255	10.0798	3.08593e-07	0.000289131	7.20663	RNASE4,	6038
204363_at	-0.920972	-0.275888	-10.0788	3.08933e-07	0.000289131	7.20551	F3	2152
222902_s_at	-0.919242	-0.194516	-10.0742	3.10493e-07	0.000289995	7.20042	EXO5	64789
235923_at	-0.88913	-0.134087	-10.0676	3.12703e-07	0.00029146	7.19325	VTI1A	143187
224164_at	-1.05827	-0.271242	-10.0522	3.17959e-07	0.000295753	7.17639	TPM3	7170
1557292_a_at	0.969764	0.143648	10.0486	3.19204e-07	0.000296305	7.17244	MCOLN3	55283
211949_s_at	-0.959508	-0.228917	-10.0446	3.20586e-07	0.000296982	7.16806	NOLC1	9221
223146_at	-0.890872	-0.219538	-10.0412	3.21776e-07	0.000297478	7.16432	WDR33	55339
224473_x_at	0.884055	0.290834	10.0377	3.23004e-07	0.000297562	7.16046	LZTS2	84445
212164_at	0.860604	0.233312	10.0355	3.23751e-07	0.000297562	7.15812	TMEM183A	92703, 653659
215331_at	0.980266	0.320929	10.0353	3.23829e-07	0.000297562	7.15788	MYH15	22989
35148_at	1.14299	0.408799	10.0187	3.29708e-07	0.000302353	7.13968
205590_at	0.973187	-0.0350367	10.0117	3.32247e-07	0.000304069	7.13191	RASGRP1	10125
223227_at	1.06851	0.191577	9.99936	3.36729e-07	0.000307551	7.11836	BBS2	583
204646_at	1.10901	-0.00573185	9.99378	3.38778e-07	0.000308454	7.11222	DPYD	1806
201925_s_at	0.828208	0.200203	9.99298	3.39074e-07	0.000308454	7.11133	CD55	1604
225582_at	1.52307	0.55516	9.97998	3.43905e-07	0.000312225	7.09701	ITPRIP	85450
226459_at	0.865038	0.219431	9.9748	3.45854e-07	0.000313161	7.09129	PIK3AP1	118788
225161_at	-1.04466	-0.297969	-9.97358	3.46313e-07	0.000313161	7.08995	GFM1	85476
206675_s_at	1.2829	0.461167	9.96558	3.49345e-07	0.000315276	7.08113	SKIL	6498
216652_s_at	-0.83134	-0.19679	-9.96197	3.50724e-07	0.000315894	7.07714	DR1	1810
226122_at	0.865608	0.117501	9.9591	3.51826e-07	0.00031626	7.07396	PLEKHG1	57480
219294_at	-1.07949	-0.1965	-9.94897	3.55738e-07	0.000319145	7.06277	CENPQ	55166
217624_at	-1.13973	-0.244858	-9.93571	3.60927e-07	0.000322631	7.04811	PDAP1	11333
214960_at	-0.99421	-0.0347867	-9.9352	3.61132e-07	0.000322631	7.04753	API5	8539
201870_at	-0.842983	-0.104273	-9.93193	3.62425e-07	0.000322631	7.04391	TOMM34	10953
203432_at	-0.869608	-0.330816	-9.93184	3.6246e-07	0.000322631	7.04381	TMPO	7112
1552648_a_at	-0.940965	-0.0571413	-9.92897	3.63597e-07	0.000323011	7.04064	TNFRSF10A	8797
209380_s_at	0.871433	0.290081	9.92265	3.6612e-07	0.000324618	7.03364	ABCC5	10057
1559382_at	-1.43982	-0.290138	-9.91655	3.68576e-07	0.00032616	7.02687	SMIM7	79086
211712_s_at	1.30403	0.24444	9.91393	3.69632e-07	0.000326459	7.02397	ANXA9	8416
223542_at	-0.928836	-0.193998	-9.9118	3.70496e-07	0.000326588	7.02161	SLF1	84250
217721_at	-1.50065	-0.469107	-9.90912	3.71585e-07	0.000326675	7.01863	SEPT7	989
227404_s_at	-4.14748	-0.957151	-9.90803	3.72031e-07	0.000326675	7.01742
221814_at	1.34184	0.200356	9.90101	3.74903e-07	0.000328563	7.00963	ADGRA2	25960
210951_x_at	-0.811847	-0.15942	-9.89829	3.76024e-07	0.000328911	7.00661	RAB27A	5873
224983_at	0.811647	0.0768858	9.89361	3.77957e-07	0.000329514	7.00142	SCARB2	950
222962_s_at	-1.02298	-0.13149	-9.89312	3.78162e-07	0.000329514	7.00086	MCM10	55388
212481_s_at	-1.1016	-0.023131	-9.88348	3.82185e-07	0.000332078	6.99015	TPM4,	7171
227370_at	0.924154	0.20017	9.88257	3.82565e-07	0.000332078	6.98914	FAM171B	165215
218839_at	1.88268	0.398969	9.878	3.84491e-07	0.000332541	6.98405	HEY1	23462
229312_s_at	0.95284	0.281733	9.87697	3.84926e-07	0.000332541	6.98291	GKAP1	80318
234312_s_at	1.0356	0.353629	9.87514	3.857e-07	0.000332541	6.98087	ACSS2	55902
213664_at	0.894654	0.112787	9.87438	3.86022e-07	0.000332541	6.98003	SLC1A1	6505
212984_at	0.956548	0.100821	9.8702	3.87797e-07	0.000333438	6.97538	ATF2	1386
206777_s_at	-0.821671	-0.165392	-9.86197	3.91326e-07	0.000335837	6.9662	CRYBB2, CRYBB2P1	1415, 1416
227087_at	1.44543	0.236075	9.85243	3.95454e-07	0.000337228	6.95557	INPP4A	3631
230762_at	-0.992432	-0.263232	-9.84913	3.96893e-07	0.000337228	6.95189
228760_at	-1.64445	-0.51838	-9.84861	3.9712e-07	0.000337228	6.95131	SRSF8	10929
201576_s_at	0.925044	0.230149	9.84723	3.97721e-07	0.000337228	6.94977	GLB1	2720
204695_at	-1.30956	-0.355141	-9.84711	3.97775e-07	0.000337228	6.94964	CDC25A	993
223254_s_at	-0.851079	-0.415235	-9.84628	3.9814e-07	0.000337228	6.94871	G2E3	55632
230951_at	0.88548	0.200989	9.84418	3.99062e-07	0.000337228	6.94636
227943_at	1.21548	0.0393792	9.84321	3.99489e-07	0.000337228	6.94528
230060_at	-1.23076	-0.442898	-9.84208	3.99985e-07	0.000337228	6.94402	CDCA7	83879
242273_at	-1.62641	-0.428955	-9.84123	4.0036e-07	0.000337228	6.94307	LLPH	84298
227541_at	-0.832598	-0.0525387	-9.8341	4.03518e-07	0.00033926	6.93511	WDR20	91833
201192_s_at	-0.823585	-0.230626	-9.83148	4.04684e-07	0.000339613	6.93219	PITPNA	5306
235086_at	-1.15551	-0.206564	-9.82562	4.07306e-07	0.000340754	6.92564	THBS1	7057
229095_s_at	1.32846	0.268913	9.8251	4.07543e-07	0.000340754	6.92505		440895, 100507334
223518_at	-1.16066	-0.192316	-9.82343	4.08292e-07	0.000340754	6.92319	DFFA	1676
218088_s_at	0.97765	0.334116	9.81962	4.10015e-07	0.000341177	6.91892	RRAGC,	64121
228069_at	-1.13186	-0.391615	-9.81899	4.10299e-07	0.000341177	6.91822	MTFR2	113115
208626_s_at	0.843129	0.273613	9.81444	4.12364e-07	0.000342268	6.91313	VAT1	10493
209110_s_at	0.774142	0.281203	9.80538	4.16513e-07	0.000344866	6.90299	RGL2	5863
223179_at	1.32783	0.506997	9.8043	4.17009e-07	0.000344866	6.90178	YPEL3	83719
210587_at	2.07621	0.0851707	9.78717	4.2498e-07	0.000350819	6.88258	INHBE	83729
210004_at	1.74757	-0.234778	9.78485	4.26073e-07	0.000351084	6.87998	OLR1	4973
204027_s_at	-1.09529	-0.190019	-9.78069	4.28042e-07	0.000352069	6.87531	METTL1	4234
1557128_at	-1.40294	-0.39602	-9.76873	4.33747e-07	0.000355798	6.86188	FAM111B	374393
210114_at	0.714354	0.17742	9.76697	4.34595e-07	0.000355798	6.8599	INVS	27130
228702_at	1.24645	0.485009	9.7656	4.35257e-07	0.000355798	6.85836	LINC-PINT	378805
214746_s_at	0.761482	0.180859	9.76187	4.37058e-07	0.000355798	6.85417	ZNF467	168544
203359_s_at	-0.878778	-0.188998	-9.76152	4.3723e-07	0.000355798	6.85377	, MYCBP	26292
241453_at	0.863349	0.266995	9.75905	4.38426e-07	0.000355798	6.851	PTK2	5747
244260_at	1.82035	0.41119	9.75408	4.4085e-07	0.000355798	6.84541
202831_at	0.945815	0.707622	9.75238	4.41681e-07	0.000355798	6.8435	GPX2	2877
214882_s_at	-1.23983	-0.408132	-9.75151	4.42108e-07	0.000355798	6.84252	SRSF2	6427, 693221
204917_s_at	1.2407	0.310344	9.75081	4.42452e-07	0.000355798	6.84173	MLLT3	4300
221676_s_at	-1.38322	-0.204858	-9.75024	4.42732e-07	0.000355798	6.84109	CORO1C	23603
204131_s_at	1.05686	0.296457	9.74962	4.43036e-07	0.000355798	6.84039	FOXO3	2309
227193_at	0.816565	0.18125	9.74916	4.43265e-07	0.000355798	6.83987	SLC30A4	7782
218710_at	-0.834098	-0.274962	-9.74697	4.44343e-07	0.000355798	6.83741	TTC27	55622
209817_at	-0.80904	-0.327813	-9.74653	4.44559e-07	0.000355798	6.83691	PPP3CB	5532
203347_s_at	-0.90989	-0.151691	-9.74545	4.45092e-07	0.000355798	6.8357	MTF2	22823
219045_at	0.894606	0.540278	9.74382	4.45901e-07	0.00035582	6.83386	RHOF	54509
201567_s_at	0.837842	0.204384	9.72751	4.54054e-07	0.00036115	6.81548	GOLGA4	2803
211628_x_at	0.857706	0.274678	9.72728	4.54168e-07	0.00036115	6.81522	FTH1P5
217010_s_at	-1.10296	-0.503977	-9.7246	4.55527e-07	0.000361512	6.81219
210645_s_at	0.901428	0.208393	9.72324	4.56213e-07	0.000361512	6.81067	TTC3	7267
202520_s_at	-0.731615	-0.306421	-9.70195	4.67154e-07	0.000369537	6.78663	MLH1	4292
211686_s_at	-0.827764	-0.249177	-9.68806	4.74444e-07	0.000374653	6.77092	MAK16	84549
204028_s_at	0.751593	0.163109	9.67786	4.79876e-07	0.000378266	6.75937	RABGAP1	2844, 23637
218408_at	-1.05801	-0.323097	-9.67635	4.80682e-07	0.000378266	6.75766	TIMM10	26519
218651_s_at	1.28506	0.401889	9.67105	4.83538e-07	0.000379856	6.75165	LARP6	55323
1554161_at	1.09658	0.284075	9.66514	4.86739e-07	0.000381463	6.74495	SLC25A27	9481
239503_at	1.09055	0.123605	9.66192	4.88495e-07	0.000381463	6.7413	CASC10	399726
217834_s_at	-0.880891	-0.208251	-9.66154	4.88703e-07	0.000381463	6.74087	SYNCRIP	10492
1554390_s_at	-0.964812	-0.211771	-9.66111	4.88939e-07	0.000381463	6.74038	ACTR2	10097
222930_s_at	-0.759893	-0.165668	-9.65275	4.93531e-07	0.000384387	6.73089	AGMAT	79814
212400_at	0.828508	0.323988	9.65021	4.94935e-07	0.000384821	6.72801	FAM102A	399665
208264_s_at	-0.723799	-0.150545	-9.64694	4.9675e-07	0.000385574	6.72429	EIF3J	8669
217954_s_at	0.702262	0.151353	9.6435	4.98663e-07	0.000386399	6.72039	PHF3	23469
226722_at	1.82024	0.394636	9.63568	5.03049e-07	0.000388835	6.7115	FAM20C	56975
227296_at	1.24497	0.450365	9.63485	5.03517e-07	0.000388835	6.71056	MFSD3	113655
241762_at	2.07782	0.346861	9.63033	5.06074e-07	0.000390147	6.70542	FBXO32	114907
223154_at	-1.03857	-0.24081	-9.62427	5.09523e-07	0.000392142	6.69852	MRPL1	65008
205383_s_at	0.847641	0.0954588	9.62258	5.10491e-07	0.000392223	6.69659	ZBTB20	26137
227157_at	-0.850146	-0.342443	-9.61945	5.12287e-07	0.000392832	6.69303	PRIMPOL	201973
227291_s_at	-0.753882	-0.368741	-9.61819	5.13011e-07	0.000392832	6.6916	BOLA3	388962
234863_x_at	-1.21898	-0.57865	-9.61305	5.15977e-07	0.00039444	6.68574	FBXO5	26271
201169_s_at	1.64035	0.451312	9.60993	5.17788e-07	0.000395159	6.68219	BHLHE40	8553
212899_at	0.838477	0.175611	9.6063	5.19905e-07	0.00039611	6.67804	CDK19	23097
221987_s_at	-0.885195	-0.161954	-9.60076	5.23145e-07	0.000397913	6.67173	TSR1	55720
219000_s_at	-1.10638	-0.297363	-9.59663	5.25582e-07	0.000399099	6.66702	DSCC1	79075
205010_at	-0.813359	-0.239723	-9.58338	5.33467e-07	0.000404146	6.65189	GNL3L	54552
241720_at	-0.918884	-0.202796	-9.58249	5.34006e-07	0.000404146	6.65087	ZNF326	284695
232184_at	-1.15086	-0.116075	-9.57967	5.35697e-07	0.00040422	6.64766	ALS2	57679
207046_at	1.07473	0.213464	9.57824	5.36562e-07	0.00040422	6.64602	HIST2H4A, HIST2H4B	8370, 554313
217850_at	-0.776812	-0.18056	-9.57605	5.37888e-07	0.00040422	6.64351	GNL3	26354
228783_at	0.868684	0.365279	9.57554	5.38194e-07	0.00040422	6.64294	BVES	11149
204780_s_at	-0.721965	-0.251171	-9.57404	5.39107e-07	0.00040422	6.64122	FAS	355
226747_at	1.0069	0.20386	9.5735	5.39436e-07	0.00040422	6.6406	TXNDC16	57544
202054_s_at	1.0808	0.341226	9.55809	5.48879e-07	0.000410619	6.62297	ALDH3A2	224
201060_x_at	1.01051	0.300444	9.55532	5.50597e-07	0.000411229	6.6198	STOM	2040
219257_s_at	1.105	0.488117	9.55121	5.53156e-07	0.000412462	6.61509	SPHK1	8877
201644_at	-0.784268	-0.195337	-9.54218	5.5882e-07	0.000416004	6.60474	TSTA3	7264
209567_at	-0.802647	-0.186508	-9.53989	5.60265e-07	0.000416398	6.60211	RRS1, ADHFE1	23212, 137872
212027_at	-0.726954	-0.177271	-9.53466	5.63588e-07	0.000418184	6.59611	RBM25	58517
234685_x_at	-1.24871	-0.34367	-9.53291	5.64699e-07	0.000418326	6.59411	KRTAP4-9	100132386
206108_s_at	-1.10408	-0.471162	-9.52838	5.67599e-07	0.000419791	6.5889	SRSF6,	6431
214321_at	1.98344	0.489227	9.51916	5.73547e-07	0.000423469	6.57831	NOV	4856
208863_s_at	-1.01654	-0.398115	-9.51779	5.74434e-07	0.000423469	6.57674	SRSF1	6426
202257_s_at	-0.721498	-0.0978018	-9.50776	5.80991e-07	0.000426732	6.56521	CD2BP2	10421
201479_at	-0.743298	-0.216874	-9.50676	5.81648e-07	0.000426732	6.56406	DKC1	1736, 100847052
230356_at	2.21206	0.474632	9.50672	5.81675e-07	0.000426732	6.56401	NKX1-2	390010
214755_at	2.36066	0.60522	9.50092	5.85507e-07	0.000428852	6.55734	UAP1L1	91373
1557630_s_at	-0.932866	-0.238502	-9.49397	5.90132e-07	0.000431331	6.54935
229871_at	-0.79848	-0.340473	-9.49299	5.90789e-07	0.000431331	6.54821	SAMD4B	55095
226792_s_at	0.931505	0.276582	9.48954	5.93108e-07	0.00043233	6.54423	KIFC2	90990
227260_at	1.4084	0.24022	9.48583	5.95606e-07	0.00043318	6.53996
1556182_x_at	0.954575	0.189626	9.48498	5.96178e-07	0.00043318	6.53899	ANKRD65	441869
239817_at	-1.25215	-0.395515	-9.48156	5.985e-07	0.000434173	6.53504
209440_at	-0.719411	-0.288732	-9.47978	5.99705e-07	0.000434355	6.53299	PRPS1	5631
239752_at	1.20305	0.275256	9.47552	6.02613e-07	0.000435767	6.52807	CECR2	27443
205130_at	-0.748077	-0.093454	-9.47386	6.03751e-07	0.000435795	6.52616	MOK	5891
222118_at	-1.15213	-0.400586	-9.47267	6.04567e-07	0.000435795	6.52478	CENPN	55839
204872_at	0.911809	0.159869	9.46845	6.07471e-07	0.000436694	6.51991	, TLE4	7091
222837_s_at	-0.833515	-0.162605	-9.46776	6.07946e-07	0.000436694	6.51912	NAA15	80155
209189_at	-1.51638	-0.270823	-9.46667	6.08695e-07	0.000436694	6.51787	FOS	2353
241908_at	0.838583	0.387542	9.45822	6.14569e-07	0.000440163	6.50811	BROX	148362
203968_s_at	-0.939202	-0.129053	-9.45694	6.15466e-07	0.000440163	6.50662	CDC6	990
230426_at	-1.01146	-0.4109	-9.44639	6.22892e-07	0.000444775	6.49443	DLD	1738
213423_x_at	1.15212	0.793745	9.43546	6.30691e-07	0.000448525	6.48178	TUSC3	7991
239231_at	-1.09223	-0.15544	-9.43499	6.31032e-07	0.000448525	6.48123	ZNF101	94039
222469_s_at	0.88926	0.22352	9.43489	6.31103e-07	0.000448525	6.48112	TOLLIP	54472
231810_at	-0.894728	-0.387141	-9.43322	6.32306e-07	0.000448679	6.47918	BRI3BP	140707
218370_s_at	0.851916	0.159928	9.42874	6.35536e-07	0.000449321	6.474	S100PBP	64766
228415_at	-0.822387	-0.203148	-9.42872	6.35552e-07	0.000449321	6.47397	AP1S2	8905
214232_at	-0.971384	-0.204962	-9.42786	6.36174e-07	0.000449321	6.47298	ABCF2	10061
223417_at	-0.913707	-0.286624	-9.42216	6.40323e-07	0.00045155	6.46637	RAD18	56852
202713_s_at	-0.697803	-0.13931	-9.41318	6.46914e-07	0.000455492	6.45596	KIAA0391,	9692
209938_at	-0.772431	-0.224758	-9.40653	6.51842e-07	0.000458252	6.44824	TADA2A	6871
1568699_at	0.924194	0.366573	9.40388	6.53812e-07	0.000458928	6.44517	IFT43	112752
217168_s_at	1.20645	0.310242	9.39381	6.61381e-07	0.000462116	6.43347	HERPUD1	9709
205203_at	1.23536	0.0832818	9.392	6.62749e-07	0.000462116	6.43137	PLD1	5337
36936_at	-0.775495	-0.206805	-9.39134	6.63247e-07	0.000462116	6.4306	TSTA3	7264
227038_at	-0.895991	-0.186659	-9.39126	6.63308e-07	0.000462116	6.43051	SGMS2	166929
221685_s_at	-0.882487	-0.331837	-9.39088	6.63601e-07	0.000462116	6.43006	SPDL1	54908
204341_at	0.976551	0.233874	9.38976	6.6445e-07	0.000462116	6.42876	TRIM16, TRIM16L	10626, 147166
223758_s_at	-0.966763	-0.121589	-9.37928	6.7246e-07	0.000465733	6.41657	GTF2H2, GTF2H2C, GTF2H2B	2966, 728340
206448_at	1.49306	0.843129	9.37815	6.7333e-07	0.000465733	6.41526	ZNF365	22891
225060_at	0.736722	0.0368287	9.37746	6.73856e-07	0.000465733	6.41446	LRP11	84918
204141_at	-1.03153	-0.264515	-9.37272	6.77521e-07	0.000465733	6.40894	TUBB2A	7280
1555772_a_at	-1.6207	-0.450114	-9.3726	6.77621e-07	0.000465733	6.40879	CDC25A	993
227686_at	-0.722347	-0.143703	-9.37178	6.78255e-07	0.000465733	6.40784	OXNAD1	92106
235226_at	1.59576	0.347845	9.37148	6.78491e-07	0.000465733	6.40749	CDK19	23097
219001_s_at	1.01976	0.168183	9.37118	6.78721e-07	0.000465733	6.40714	DCAF10	79269
235394_at	-0.861246	-0.228269	-9.37099	6.78865e-07	0.000465733	6.40693	PLAA	9373
230193_at	-0.958893	-0.198886	-9.35322	6.92828e-07	0.000474596	6.38622	WDR66	144406
226158_at	2.00919	0.571752	9.34896	6.96226e-07	0.000475839	6.38124	KLHL24	54800
242150_at	-0.886886	-0.377622	-9.34832	6.96735e-07	0.000475839	6.3805
203919_at	0.997091	0.0963891	9.34149	7.02212e-07	0.000478861	6.37253	TCEA2	6919
239085_at	1.0539	0.216041	9.33986	7.03528e-07	0.00047904	6.37063	JDP2	122953
231233_at	1.03266	0.338495	9.33268	7.09353e-07	0.000482284	6.36224	PCAT6	100506696
235133_at	0.780075	0.101196	9.33062	7.11037e-07	0.000482707	6.35982	ZDHHC14	79683
206081_at	-0.951117	-0.43259	-9.32274	7.17502e-07	0.00048519	6.35061	SLC24A1	9187
1553679_s_at	-0.915853	-0.330446	-9.32254	7.17665e-07	0.00048519	6.35038	VKORC1L1	154807
227169_at	0.792214	0.219403	9.32205	7.18073e-07	0.00048519	6.3498	DNAJC18	202052
202482_x_at	-0.739802	-0.259827	-9.32097	7.18961e-07	0.00048519	6.34855	RANBP1	5902
57715_at	0.893624	0.358173	9.31753	7.21807e-07	0.00048639	6.34453	CALHM2	51063
202627_s_at	0.936348	0.283442	9.30726	7.30386e-07	0.000491442	6.3325	SERPINE1	5054
226249_at	0.9338	0.227656	9.29833	7.37942e-07	0.000495793	6.32203	SNX30	401548
232369_at	1.71453	0.236412	9.29516	7.4064e-07	0.00049612	6.31831
214507_s_at	-0.825419	-0.187985	-9.29485	7.40903e-07	0.00049612	6.31795	EXOSC2	23404
209713_s_at	-1.00698	-0.121698	-9.29391	7.41702e-07	0.00049612	6.31686	SLC35D1	23169
210250_x_at	-0.76518	-0.221983	-9.28595	7.48538e-07	0.000499958	6.30752	ADSL	158
201143_s_at	-0.6959	-0.236342	-9.28355	7.50615e-07	0.000500561	6.3047	EIF2S1	1965
241359_at	0.884718	-0.0241407	9.28149	7.52398e-07	0.000500561	6.30228	TLCD2	727910
229296_at	1.3626	-0.0188434	9.27882	7.54722e-07	0.000500561	6.29914	LINC01503	100506119
228528_at	-1.19769	-0.178508	-9.27869	7.54835e-07	0.000500561	6.29899	C1orf132	407025, 407026
233852_at	-0.904743	-0.246586	-9.27851	7.54994e-07	0.000500561	6.29878
210213_s_at	-0.786109	-0.127639	-9.2773	7.56044e-07	0.000500561	6.29736	EIF6,	3692
225470_at	-0.824981	-0.258316	-9.27129	7.61304e-07	0.00050302	6.2903	NUP35	129401
209355_s_at	1.25031	0.164242	9.27054	7.6197e-07	0.00050302	6.28941	PLPP3	8613
217286_s_at	0.666964	0.0851469	9.26279	7.68818e-07	0.000506239	6.28031	NDRG3	57446
223540_at	1.15734	0.0869094	9.2625	7.69071e-07	0.000506239	6.27997	NECTIN4	81607
235956_at	0.83043	0.0607745	9.26015	7.71165e-07	0.000506883	6.2772	CEP126	57562
204237_at	2.63162	0.445399	9.25715	7.73847e-07	0.000507912	6.27367	GULP1	51454
235117_at	-0.924639	-0.147194	-9.24963	7.80602e-07	0.000511607	6.26482	CHAC2	494143
1555764_s_at	-0.879646	-0.267328	-9.24806	7.82017e-07	0.000511797	6.26298	TIMM10	26519
220526_s_at	-0.809673	-0.191352	-9.2457	7.84154e-07	0.000512458	6.2602	MRPL20	55052
222858_s_at	-1.68572	-0.432137	-9.24248	7.87087e-07	0.000513637	6.2564	DAPP1	27071
203355_s_at	1.16738	0.407252	9.23611	7.92908e-07	0.000516695	6.24889	PSD3	23362
222802_at	-2.38458	-0.52691	-9.23096	7.97649e-07	0.000519041	6.24282	EDN1	1906
229050_s_at	0.867367	0.301764	9.22287	8.05158e-07	0.000523178	6.23328	, SNHG7	84973
206653_at	-1.29989	-0.394576	-9.21377	8.13705e-07	0.000527978	6.22253	POLR3G	10622
221970_s_at	-0.703026	-0.149	-9.20636	8.20732e-07	0.000531386	6.21377	NOL11	25926
1558527_at	1.01685	0.239282	9.20468	8.2233e-07	0.000531386	6.21179	PAXIP1-AS2	100132707
1558021_at	-1.1146	-0.172377	-9.20454	8.22462e-07	0.000531386	6.21163	RABEPK	10244
233970_s_at	-0.774395	-0.138411	-9.19247	8.34071e-07	0.000538122	6.19735	TRMT6	51605
238977_at	-1.02303	-0.324418	-9.18719	8.39205e-07	0.000540667	6.1911	MCM6	4175
205036_at	-0.800433	-0.224417	-9.18538	8.40976e-07	0.000541042	6.18895	LSM6	11157
225747_at	0.931533	0.444259	9.17934	8.46901e-07	0.000544084	6.1818	COQ10A	93058
225274_at	0.669614	0.0500508	9.17749	8.48732e-07	0.000544491	6.1796	PCYOX1	51449
238856_s_at	-1.0389	-0.380027	-9.17598	8.5022e-07	0.000544678	6.17782	MIR103A2	406896
1558163_at	1.40971	0.376502	9.17391	8.52275e-07	0.000545174	6.17536	PEX13	5194
200743_s_at	1.38418	0.346179	9.17278	8.53392e-07	0.000545174	6.17402	TAF10, TPP1	6881, 1200
209520_s_at	-0.674786	-0.184876	-9.16331	8.62856e-07	0.000550447	6.16279	NCBP1	4686
209849_s_at	-0.80499	-0.236569	-9.15952	8.66675e-07	0.000552084	6.15829	RAD51C	5889
200867_at	0.685426	0.237887	9.15665	8.69574e-07	0.000552084	6.15489	RNF114	55905
226631_at	-0.914466	-0.365505	-9.15621	8.70025e-07	0.000552084	6.15436	METTL10	399818
235625_at	1.20118	0.294605	9.15549	8.70757e-07	0.000552084	6.1535	VPS41	27072
202585_s_at	-0.778489	-0.168849	-9.15476	8.71491e-07	0.000552084	6.15264	NFX1	4799
210015_s_at	0.929141	0.557197	9.14791	8.78487e-07	0.000555742	6.1445	MAP2	4133
221899_at	0.909297	0.118366	9.14242	8.84126e-07	0.000558162	6.13798	N4BP2L2	10443
219496_at	-0.798008	-0.202864	-9.14061	8.85995e-07	0.000558162	6.13583	SOWAHC	65124
204812_at	-0.793138	-0.216931	-9.13826	8.88433e-07	0.000558162	6.13303	ZW10	9183
201649_at	0.7353	0.0341201	9.13717	8.89558e-07	0.000558162	6.13174	UBE2L6	9246
232065_x_at	-0.884655	-0.263657	-9.13715	8.89579e-07	0.000558162	6.13171	CENPL	91687
48825_at	0.874638	0.289462	9.13706	8.89676e-07	0.000558162	6.1316	ING4	51147
202883_s_at	-0.791186	-0.22429	-9.1317	8.95257e-07	0.00056089	6.12523	PPP2R1B	5519
210987_x_at	-0.652662	-0.32654	-9.13034	8.96683e-07	0.00056101	6.12361	TPM1	7168
235443_at	1.13449	0.242663	9.12847	8.98646e-07	0.000561467	6.12138	CKMT2-AS1	100131067
218677_at	1.13683	0.595592	9.12663	9.00579e-07	0.000561903	6.11919	S100A14	57402
201539_s_at	0.905121	0.229569	9.11966	9.07942e-07	0.000565721	6.11089	FHL1	2273
205862_at	1.49101	0.2183	9.11824	9.09454e-07	0.000565888	6.1092	GREB1	9687
222844_s_at	-0.675128	-0.167058	-9.10713	9.21347e-07	0.000572504	6.09596	SRR	63826
225803_at	1.85783	0.433744	9.10023	9.28821e-07	0.000575891	6.08772	FBXO32	114907
229969_at	-1.01347	-0.333488	-9.09976	9.2933e-07	0.000575891	6.08716	SEC63	11231
208662_s_at	0.920657	0.125313	9.09794	9.31317e-07	0.000576338	6.08498	TTC3	7267
218558_s_at	-0.821592	-0.159636	-9.08717	9.43145e-07	0.000582864	6.07212	MRPL39	54148
1553158_at	0.882342	0.32665	9.08437	9.46242e-07	0.000583687	6.06878	CEP19, RNU6-646P	84984
201880_at	0.723866	0.161259	9.08365	9.47044e-07	0.000583687	6.06792	ARIH1	25820, 693215
1567080_s_at	-0.94564	-0.331599	-9.07647	9.55049e-07	0.000587352	6.05934	, CLN6	54982
201930_at	-0.889932	-0.397086	-9.07593	9.55659e-07	0.000587352	6.05868	MCM6	4175
224852_at	0.995554	0.343814	9.07486	9.56863e-07	0.000587352	6.0574	TTC17	55761
209514_s_at	-0.839849	-0.155026	-9.07134	9.6082e-07	0.000588986	6.05319	RAB27A	5873
1569157_s_at	1.05661	0.717636	9.06517	9.67809e-07	0.000591545	6.04581	ZNF846	162993
239010_at	1.23107	0.615152	9.06393	9.69222e-07	0.000591545	6.04432
237383_at	1.08768	0.156997	9.06358	9.69611e-07	0.000591545	6.04391
201873_s_at	-0.823067	-0.249048	-9.06307	9.70197e-07	0.000591545	6.04329	ABCE1	6059
226571_s_at	1.10293	0.240004	9.05794	9.7606e-07	0.000594323	6.03715
223194_s_at	1.21306	0.325537	9.05474	9.79739e-07	0.000595453	6.03332	SLC22A23	63027
243840_at	-1.02114	-0.246734	-9.05293	9.81824e-07	0.000595453	6.03115
223520_s_at	-1.11535	-0.259427	-9.05292	9.81843e-07	0.000595453	6.03113	KIF13A	63971
234944_s_at	-1.12892	-0.37164	-9.05106	9.83982e-07	0.000595516	6.02891	MTFR2	113115
219048_at	1.09203	0.150435	9.05056	9.84565e-07	0.000595516	6.0283	PIGN	23556
239944_at	-1.17442	-0.341111	-9.04825	9.87242e-07	0.000596342	6.02554
202351_at	1.05199	0.121205	9.04642	9.89366e-07	0.000596832	6.02334	ITGAV	3685
218374_s_at	-1.4026	-0.348608	-9.04496	9.91077e-07	0.000597073	6.02158	C12orf4	57102
221696_s_at	-0.695028	0.0262696	-9.03952	9.97433e-07	0.000599715	6.01506	STYK1	55359
227850_x_at	1.15072	0.295893	9.03896	9.98099e-07	0.000599715	6.01438	CDC42EP5	148170
224452_s_at	0.672798	0.150052	9.03349	1.00454e-06	0.00060279	6.00782	FAM220A	84792
213187_x_at	0.695566	0.264938	9.02989	1.00881e-06	0.000604552	6.0035	, FTL, FTLP3	2512
225755_at	0.782338	0.114875	9.02737	1.01181e-06	0.000605553	6.00047	KLHDC8B	200942
218851_s_at	1.13578	0.336998	9.02622	1.01318e-06	0.000605578	5.99909	WDR33	55339
232530_at	1.35493	0.0524808	9.01924	1.02155e-06	0.000609688	5.9907	PLD1	5337
203794_at	0.942265	0.235879	9.01825	1.02274e-06	0.000609688	5.98951	CDC42BPA	8476
1552774_a_at	0.76028	0.0803844	9.01363	1.02833e-06	0.000612038	5.98396	SLC25A27	9481
210092_at	-0.83051	-0.104322	-9.01277	1.02937e-06	0.000612038	5.98292	MAGOH, LRP8	4116, 7804
208368_s_at	-0.928207	-0.335969	-9.01159	1.03081e-06	0.000612094	5.9815	BRCA2	675
204603_at	-0.939198	-0.149854	-9.0102	1.0325e-06	0.000612297	5.97983	EXO1	9156
201626_at	1.3164	0.249719	9.00883	1.03417e-06	0.000612488	5.97818	INSIG1	3638
229810_at	0.910146	0.219617	9.00643	1.03711e-06	0.00061343	5.97528	RSPH3	83861
203860_at	0.699996	0.0429789	9.00279	1.04158e-06	0.000615271	5.9709	PCCA	5095
208897_s_at	-0.854627	-0.218655	-8.99532	1.05081e-06	0.000619919	5.9619	DDX18	8886
1555310_a_at	1.46526	0.352227	8.99387	1.0526e-06	0.000619985	5.96016	, PAK6	106821730, 56924
226932_at	1.21634	0.208063	8.99303	1.05364e-06	0.000619985	5.95915	SSPN	8082
236270_at	1.01168	0.202872	8.9875	1.06056e-06	0.000622754	5.95248	NFATC4	4776
223570_at	-0.918059	-0.215905	-8.9863	1.06206e-06	0.000622754	5.95104	MCM10	55388
235425_at	-0.970082	-0.34732	-8.98599	1.06246e-06	0.000622754	5.95065	SGO2	151246
210298_x_at	0.876904	0.176829	8.98265	1.06666e-06	0.000624238	5.94663	FHL1	2273
204859_s_at	-0.923495	-0.341037	-8.9818	1.06773e-06	0.000624238	5.9456	APAF1	317
202250_s_at	0.739158	0.320641	8.97146	1.08087e-06	0.000631107	5.93313	DCAF8	50717
223493_at	-1.1231	-0.48289	-8.96424	1.09016e-06	0.000634444	5.9244	FBXO4	26272
238021_s_at	1.07545	0.102434	8.96378	1.09075e-06	0.000634444	5.92384	CRNDE	101927480
222583_s_at	-0.835077	-0.141623	-8.96376	1.09077e-06	0.000634444	5.92382	NUP50,	10762
230112_at	-0.96233	-0.0902993	-8.95387	1.10363e-06	0.000641104	5.91187	MARCH4	57574
240032_at	-0.964107	-0.268864	-8.94493	1.11539e-06	0.00064711	5.90105		105274304
201013_s_at	-0.694084	-0.428657	-8.94135	1.12014e-06	0.000649036	5.89672	PAICS	10606
214866_at	-1.07325	-0.0779551	-8.93683	1.12617e-06	0.000651702	5.89124	PLAUR	5329
212314_at	1.11236	0.320158	8.93386	1.13015e-06	0.000653173	5.88764	SEL1L3	23231
226512_at	0.86856	0.0791779	8.92928	1.13631e-06	0.000655018	5.88209	ZMYM2	7750
218217_at	0.636599	0.150636	8.9291	1.13656e-06	0.000655018	5.88187	SCPEP1	59342
218156_s_at	-0.918218	-0.159506	-8.92774	1.1384e-06	0.000655018	5.88021	TSR1	55720
210652_s_at	0.957108	0.339759	8.92722	1.1391e-06	0.000655018	5.87958	TTC39A	22996
226636_at	1.31015	0.0194428	8.91428	1.15675e-06	0.000664328	5.86389	PLD1	5337
202886_s_at	-0.870738	-0.211901	-8.90267	1.17285e-06	0.00067272	5.84979	PPP2R1B	5519
221598_s_at	-0.742508	-0.193016	-8.89923	1.17766e-06	0.000674632	5.84561	MED27	9442
218997_at	-0.660213	-0.175693	-8.89359	1.18561e-06	0.000678331	5.83874	POLR1E	64425
209340_at	-0.900589	-0.214481	-8.89078	1.18959e-06	0.000679751	5.83533	UAP1	6675
221712_s_at	-0.776337	-0.193867	-8.88901	1.1921e-06	0.000680333	5.83317	WDR74	54663
230831_at	1.01252	0.155686	8.88072	1.20395e-06	0.000682514	5.82308	FRMD5	84978
221908_at	1.24168	0.376988	8.88065	1.20403e-06	0.000682514	5.823	RNFT2	84900
1552664_at	1.28496	0.383898	8.87865	1.20692e-06	0.000682514	5.82056	FLCN	201163
1560738_at	-0.94764	-0.0446803	-8.87827	1.20746e-06	0.000682514	5.8201
223414_s_at	-0.782177	-0.196345	-8.8782	1.20756e-06	0.000682514	5.82002	LYAR	55646
213223_at	0.919784	0.230114	8.87764	1.20838e-06	0.000682514	5.81933	RPL28	6158, 102465483
202620_s_at	-0.914369	-0.431164	-8.87704	1.20924e-06	0.000682514	5.8186	PLOD2	5352
225485_at	-0.864629	-0.307369	-8.87704	1.20924e-06	0.000682514	5.8186	CEP41	95681
235244_at	-1.01428	-0.240884	-8.87536	1.21166e-06	0.000682514	5.81656	CCDC58	131076
212614_at	0.895198	0.418509	8.87516	1.21196e-06	0.000682514	5.81631	ARID5B	84159
231018_at	1.13568	0.310769	8.87483	1.21243e-06	0.000682514	5.81591	PALM3	342979
212031_at	-0.791934	-0.258973	-8.8722	1.21624e-06	0.000683689	5.81271	RBM25	58517
212944_at	0.969958	0.131549	8.87132	1.21752e-06	0.000683689	5.81163	SLC5A3	6526
210187_at	-0.917983	-0.117407	-8.86573	1.22567e-06	0.000686826	5.80482	FKBP1A	2280, 102465524
233223_at	0.87954	0.201543	8.86542	1.22613e-06	0.000686826	5.80444
219895_at	1.48553	0.0618948	8.86382	1.22847e-06	0.000687292	5.80249	TMEM255A	55026
1569076_a_at	1.10242	0.548863	8.86263	1.23022e-06	0.000687425	5.80104
205401_at	-0.873695	-0.303206	-8.86096	1.23268e-06	0.000687727	5.799	AGPS	8540
209007_s_at	0.858147	0.178091	8.85996	1.23415e-06	0.000687727	5.79778	RSRP1	57035
226568_at	0.955145	0.25162	8.85919	1.2353e-06	0.000687727	5.79683	FAM102B	284611
209188_x_at	-0.722645	-0.13702	-8.85769	1.23751e-06	0.000688118	5.795	DR1	1810
209421_at	-0.765327	-0.267346	-8.85525	1.24113e-06	0.000689286	5.79203	MSH2	4436
233506_at	-0.91407	-0.0499562	-8.85168	1.24643e-06	0.000691386	5.78767	BZW1	9689
220298_s_at	0.826709	0.119125	8.84818	1.25166e-06	0.000693444	5.78339	SPATA6	54558
213182_x_at	1.03212	0.325281	8.83893	1.26559e-06	0.000700306	5.7721	CDKN1C	1028
227539_at	0.759098	0.0617239	8.83577	1.27039e-06	0.000701527	5.76823
206155_at	1.7388	0.493254	8.83545	1.27088e-06	0.000701527	5.76784	ABCC2	1244
206068_s_at	-0.817394	-0.255905	-8.83387	1.27328e-06	0.000701998	5.76591	ACADL	33
1556181_at	0.854367	0.166868	8.82903	1.28069e-06	0.000704158	5.75998	ANKRD65	441869
205486_at	0.820521	0.330149	8.82818	1.28199e-06	0.000704158	5.75895	TESK2	10420
224413_s_at	-0.852123	-0.151111	-8.82751	1.28302e-06	0.000704158	5.75813	TM2D2	83877
224780_at	0.779985	0.0878894	8.82727	1.28339e-06	0.000704158	5.75784	RBM17	84991
231203_at	0.832961	0.29115	8.82536	1.28633e-06	0.000704922	5.7555		100505478
206814_at	-1.06484	-0.0622812	-8.82329	1.28953e-06	0.000705824	5.75296	NGF	4803
209641_s_at	1.05015	0.414728	8.82172	1.29196e-06	0.000706104	5.75104	ABCC3	8714
209019_s_at	0.851015	0.328772	8.82095	1.29314e-06	0.000706104	5.7501	PINK1	65018, 102464833
1562988_at	1.05606	0.343115	8.81719	1.29899e-06	0.000708448	5.74549
206245_s_at	-0.802564	-0.126806	-8.81312	1.30535e-06	0.000711062	5.74051	IVNS1ABP	10625
209529_at	1.18384	0.406645	8.81093	1.30878e-06	0.000712077	5.73783	PLPP2	8612
238929_at	-0.869128	-0.3336	-8.80869	1.31231e-06	0.00071268	5.73508	SRSF8	10929
221951_at	0.776859	0.157712	8.80824	1.31302e-06	0.00071268	5.73452	TMEM80	283232
209806_at	0.688475	0.20789	8.80453	1.31887e-06	0.000715003	5.72998
223147_s_at	-0.825787	-0.196583	-8.80314	1.32108e-06	0.000715306	5.72828	WDR33	55339
203231_s_at	1.20315	0.179537	8.8022	1.32258e-06	0.000715306	5.72712	ATXN1	6310
204039_at	0.754362	0.253471	8.79564	1.33303e-06	0.000719249	5.71908	CEBPA	1050
1557129_a_at	-1.83276	-0.590537	-8.7866	1.34761e-06	0.00072449	5.70797	FAM111B	374393
1555731_a_at	-0.907357	-0.322836	-8.78608	1.34845e-06	0.00072449	5.70733	AP1S3	130340
219493_at	-0.963934	-0.307744	-8.78583	1.34885e-06	0.00072449	5.70703	SHCBP1	79801
206335_at	0.773209	0.166621	8.78339	1.35281e-06	0.000725619	5.70403	GALNS	2588
228155_at	1.50602	0.314254	8.7773	1.36276e-06	0.000729644	5.69655	FAM213A	84293
229395_at	1.18775	0.43547	8.77684	1.36353e-06	0.000729644	5.69597	STX4	6810
210827_s_at	1.49652	-0.0151685	8.77276	1.37024e-06	0.000731574	5.69096	ELF3,	1999
1569253_at	-0.831786	-0.0600026	-8.76544	1.38236e-06	0.000737124	5.68196	INTS4	92105
209653_at	-0.877782	-0.0946704	-8.75581	1.3985e-06	0.000744853	5.6701	, KPNA4	3840
205895_s_at	-0.962001	-0.22619	-8.75242	1.40424e-06	0.000747035	5.66592	NOLC1	9221
205642_at	-0.962418	-0.356111	-8.75097	1.40669e-06	0.000747074	5.66413	CNTRL	11064
1556063_s_at	-0.916275	-0.313144	-8.75044	1.4076e-06	0.000747074	5.66348	RPP30	10556
217952_x_at	0.735123	0.140221	8.74861	1.41069e-06	0.000747846	5.66123	PHF3	23469
208663_s_at	0.889918	0.16581	8.74424	1.41816e-06	0.00075093	5.65583	TTC3	7267
207156_at	1.1662	0.015885	8.7326	1.43824e-06	0.00075979	5.64147	HIST1H2AG	8969
205283_at	0.722253	0.233848	8.72962	1.44341e-06	0.000761032	5.6378	FKTN	2218
208134_x_at	1.3135	0.313122	8.72932	1.44393e-06	0.000761032	5.63743	PSG2	5670
213946_s_at	0.859033	0.292165	8.71106	1.47619e-06	0.000775335	5.61486	OBSL1	23363
235130_at	-0.847792	-0.385844	-8.70983	1.47838e-06	0.000775595	5.61334	MIR103A2	406896
201144_s_at	-0.619439	-0.109891	-8.70511	1.48686e-06	0.000779143	5.60749	EIF2S1	1965
210663_s_at	0.819242	0.265518	8.70117	1.49396e-06	0.000781963	5.60263	KYNU	8942
216228_s_at	-0.965362	-0.225511	-8.69751	1.5006e-06	0.000784178	5.59809	WDHD1	11169
202437_s_at	1.33879	0.584399	8.69688	1.50176e-06	0.000784178	5.59731	CYP1B1	1545
201540_at	1.0788	0.368345	8.69463	1.50586e-06	0.000784178	5.59452	FHL1	2273
235431_s_at	0.846254	0.312257	8.6941	1.50682e-06	0.000784178	5.59387	PELI3	246330
233002_at	1.11368	0.133731	8.69264	1.50949e-06	0.000784178	5.59206	PPP4R4	57718
223480_s_at	-0.758452	-0.13215	-8.69249	1.50976e-06	0.000784178	5.59188	MRPL47	57129
228774_at	-1.00121	-0.257752	-8.69222	1.51026e-06	0.000784178	5.59153	CEP78	84131
203498_at	1.61817	0.445623	8.68857	1.51697e-06	0.000784301	5.58701	RCAN2	10231
206401_s_at	1.17109	0.434677	8.68791	1.51818e-06	0.000784301	5.58619	MAPT	4137
227599_at	-1.11081	-0.262322	-8.68745	1.51901e-06	0.000784301	5.58563	MB21D2	151963
207517_at	-1.50797	-0.191151	-8.68638	1.521e-06	0.000784301	5.58429	LAMC2	3918
211354_s_at	-1.1762	-0.199262	-8.68606	1.52158e-06	0.000784301	5.5839	LEPR	3953
203285_s_at	1.09615	0.128073	8.68418	1.52505e-06	0.000784301	5.58158	HS2ST1	9653
201504_s_at	-0.927996	-0.290022	-8.68366	1.52602e-06	0.000784301	5.58093	TSN	7247
229846_s_at	-0.698524	-0.208742	-8.67711	1.5382e-06	0.000788778	5.5728	MAPKAP1	79109
226629_at	-0.877738	-0.107491	-8.6696	1.55228e-06	0.000794275	5.56348	SLC43A2	124935
243092_at	-0.946379	-0.136371	-8.66954	1.55241e-06	0.000794275	5.5634	PAN3-AS1
238431_at	-0.681616	-0.37882	-8.66714	1.55693e-06	0.000795694	5.56043	ARL5A	26225
209305_s_at	0.98727	0.573751	8.66447	1.56198e-06	0.00079738	5.55711	GADD45B	4616
226964_at	1.03511	0.184315	8.6619	1.56688e-06	0.000798982	5.55391	TTBK2	146057
1553994_at	-1.25398	-0.0922772	-8.65819	1.57396e-06	0.000800798	5.5493	NT5E	4907
212411_at	-0.738878	-0.167396	-8.65501	1.58005e-06	0.000803	5.54535	IMP4	92856
204079_at	0.728492	0.260886	8.65283	1.58425e-06	0.000803891	5.54264	TPST2	8459
209875_s_at	1.75709	1.0883	8.65214	1.58558e-06	0.000803891	5.54178	SPP1	6696
201478_s_at	-0.707178	-0.232166	-8.65112	1.58754e-06	0.000803891	5.54052	DKC1	1736, 100847052
229864_at	-0.820659	-0.0806686	-8.64767	1.59422e-06	0.000805586	5.53623	ELP6	54859
215821_x_at	0.797861	0.138708	8.64688	1.59577e-06	0.000805586	5.53524	PSG3	5671
202918_s_at	-0.833978	-0.129697	-8.644	1.60138e-06	0.000806626	5.53165	MOB4, HSPE1-MOB4	25843, 100529241
230134_s_at	-0.812157	-0.2353	-8.63959	1.60999e-06	0.000810068	5.52616	RC3H2	54542
225123_at	1.54333	0.55948	8.63777	1.61356e-06	0.000810468	5.5239	SESN3	143686
207654_x_at	-0.74783	-0.17353	-8.63646	1.61613e-06	0.000810468	5.52227	DR1	1810
208378_x_at	-1.27575	-0.283254	-8.62688	1.63511e-06	0.000818184	5.51033	FGF5	2250
205796_at	-0.826402	-0.105125	-8.62245	1.64397e-06	0.000820811	5.50481	TCP11L1	55346
213455_at	0.759437	0.193879	8.61597	1.65702e-06	0.000826419	5.49672	FAM114A1	92689
240928_at	-0.934526	-0.103062	-8.6134	1.66222e-06	0.000828103	5.49352	FCF1	51077
226622_at	2.22351	0.127382	8.61137	1.66635e-06	0.000829254	5.49098	LINC00969, MUC20	200958
226394_at	-1.17188	-0.372818	-8.60983	1.66949e-06	0.000829907	5.48906	MARCH5	54708
218581_at	0.944728	0.534469	8.59834	1.69309e-06	0.000838887	5.4747	ABHD4	63874
1554114_s_at	-1.33387	-0.259475	-8.58483	1.72128e-06	0.000851001	5.45781	SSH2	85464
227067_x_at	-1.21442	-0.140827	-8.57984	1.73184e-06	0.000855117	5.45156	NBPF26, NBPF19, NOTCH2, NBPF14, NOTCH2NL,	101060226, 4853, 25832, 100996763, 388677
201038_s_at	-0.804301	-0.359445	-8.57911	1.73337e-06	0.000855117	5.45066	ANP32A	8125
219882_at	0.753716	0.341192	8.57749	1.73682e-06	0.000855895	5.44862	TTLL7	79739
1555854_at	2.88701	1.49818	8.5751	1.74191e-06	0.000857471	5.44563	AKR1C1, AKR1C2	1645, 1646
204510_at	-0.704622	-0.289428	-8.57414	1.74396e-06	0.000857542	5.44442	CDC7	8317
209715_at	-1.03487	-0.185285	-8.57327	1.74582e-06	0.000857542	5.44333	CBX5	23468, 100616400
218238_at	-0.769667	-0.102067	-8.57037	1.75203e-06	0.000859662	5.4397	GTPBP4	23560
229526_at	0.927172	0.163786	8.56144	1.77131e-06	0.000866319	5.42851	AQP11	282679
223639_s_at	-0.688017	-0.0968519	-8.55929	1.77599e-06	0.000866746	5.4258	ZNRD1	30834
227293_at	-0.70012	-0.351715	-8.55469	1.78604e-06	0.000869807	5.42003
224150_s_at	0.71545	0.0762186	8.55466	1.78609e-06	0.000869807	5.42001	CEP70	80321
224200_s_at	-0.93247	-0.271412	-8.54677	1.80347e-06	0.00087733	5.4101	RAD18	56852
228080_at	0.888719	0.473493	8.54556	1.80615e-06	0.000877695	5.40858	LAYN	143903
238383_at	-1.13313	-0.649376	-8.54384	1.80998e-06	0.000878617	5.40641	C6orf58	352999
236834_at	-1.00582	-0.356236	-8.53821	1.82253e-06	0.000882129	5.39934	SCFD2	152579
213040_s_at	1.72058	0.702325	8.5378	1.82346e-06	0.000882129	5.39882	NPTXR	23467
228796_at	0.822795	0.268302	8.53712	1.82497e-06	0.000882129	5.39797	CPNE4	131034
202084_s_at	1.01672	0.404324	8.53496	1.82983e-06	0.000882604	5.39525	SEC14L1	6397
225484_at	-0.803582	-0.314786	-8.5336	1.83288e-06	0.000882771	5.39355	CEP41	95681
1569453_a_at	0.891883	0.298418	8.52547	1.85129e-06	0.000887752	5.38332
231897_at	0.828325	0.504871	8.52268	1.85766e-06	0.000889426	5.37981	, PTGR1	22949
221898_at	0.980905	0.0852827	8.51828	1.86774e-06	0.000891434	5.37427	PDPN	10630
222740_at	-0.753745	-0.272372	-8.50392	1.90106e-06	0.00089986	5.35618	ATAD2	29028
218440_at	0.738442	0.130336	8.50385	1.90122e-06	0.00089986	5.35609	MCCC1	56922
201413_at	0.712964	0.146015	8.50214	1.90524e-06	0.000899891	5.35393	HSD17B4	3295
221565_s_at	0.738312	0.351834	8.49922	1.9121e-06	0.000900386	5.35025	CALHM2	51063
207233_s_at	0.780712	0.265355	8.49917	1.91223e-06	0.000900386	5.35018	MITF	4286
225877_at	0.768479	0.0765877	8.49385	1.92481e-06	0.000905375	5.34347	TYSND1	219743
209161_at	-0.919743	-0.150836	-8.48943	1.93532e-06	0.000909376	5.3379	PRPF4	9128
1557349_at	-0.78782	-0.124768	-8.4627	2.00028e-06	0.000934789	5.30411	RERE	473
205613_at	0.781052	0.172289	8.45064	2.03035e-06	0.000946664	5.28883	SYT17	51760
227560_at	-1.03673	-0.369601	-8.44204	2.05209e-06	0.000955361	5.27793	SFXN2	118980
224721_at	-0.620263	-0.157821	-8.44087	2.05507e-06	0.000955648	5.27645	WDR75	84128
224367_at	1.18313	0.237721	8.44015	2.0569e-06	0.000955648	5.27553	BEX2	84707
215259_s_at	1.16182	0.260818	8.43287	2.07554e-06	0.000962339	5.2663	CADM4	199731
216508_x_at	-0.678454	-0.282625	-8.43016	2.08254e-06	0.000964603	5.26285	HMGB1P4
203345_s_at	-0.706138	-0.0764094	-8.4274	2.08968e-06	0.000965905	5.25935	MTF2	22823
234295_at	-0.803147	-0.123422	-8.42697	2.09079e-06	0.000965905	5.2588	DBR1	51163
242916_at	-0.676817	-0.286165	-8.42661	2.09172e-06	0.000965905	5.25835	CNTRL	11064
213051_at	-1.0953	-0.412345	-8.42543	2.09479e-06	0.000966343	5.25684	ZC3HAV1	56829
219472_at	-0.809315	-0.164187	-8.42089	2.10663e-06	0.000967875	5.25108	CENPO	79172
222286_at	0.665038	0.29684	8.41297	2.12743e-06	0.000974481	5.24102	SNAPC3	6619
208956_x_at	-0.726122	-0.301371	-8.40573	2.14666e-06	0.000981309	5.23181	DUT	1854
1554667_s_at	-0.703974	-0.106854	-8.40352	2.15255e-06	0.00098203	5.229	METTL8	79828
204235_s_at	2.57073	0.341091	8.39474	2.17618e-06	0.000990137	5.21782	GULP1	51454
218126_at	-0.670659	0.0145182	-8.39196	2.18372e-06	0.000992267	5.21428	RMDN3	55177
214942_at	-1.06872	-0.0530421	-8.38131	2.21286e-06	0.00100256	5.2007	RBM34	23029
224994_at	0.844343	0.100699	8.37292	2.23613e-06	0.00100903	5.18999	CAMK2D	817
217925_s_at	0.661055	0.258573	8.35599	2.28382e-06	0.00102344	5.16837	C6orf106	64771
229500_at	-0.638411	-0.128534	-8.35357	2.29073e-06	0.00102553	5.16528	SLC30A9	10463
223709_s_at	1.37538	0.050409	8.34954	2.30229e-06	0.00102868	5.16012	WNT10A	80326
223599_at	0.731793	0.036984	8.34467	2.31634e-06	0.00103362	5.15389	TRIM6	117854
228382_at	-0.809012	-0.161556	-8.34028	2.32908e-06	0.00103594	5.14827	OTULIN	90268
1560498_at	1.88267	0.366401	8.33957	2.33114e-06	0.00103594	5.14737
208914_at	0.701005	0.198887	8.33173	2.3541e-06	0.00104261	5.13733	GGA2	23062
235311_at	1.1311	0.43627	8.32821	2.36449e-06	0.00104549	5.13282	FKBP14	55033
229759_s_at	-0.776466	-0.375316	-8.32797	2.36522e-06	0.00104549	5.1325	VEPH1	79674
203106_s_at	0.837519	0.0623938	8.3213	2.38504e-06	0.00105243	5.12395	VPS41	27072
210790_s_at	-0.701016	-0.143685	-8.32003	2.38883e-06	0.00105286	5.12233	SAR1A	56681
210559_s_at	-0.853489	-0.564405	-8.31838	2.39377e-06	0.00105402	5.12021	CDK1	983
223255_at	-0.699634	-0.364111	-8.31181	2.41356e-06	0.00106171	5.11177	G2E3	55632
203612_at	-0.722386	-0.0669491	-8.30396	2.43742e-06	0.0010691	5.1017	BYSL	705
1552306_at	-0.890768	-0.229166	-8.29548	2.46348e-06	0.00107721	5.0908	ALG10	84920
220468_at	-1.17157	-0.0505384	-8.29486	2.46539e-06	0.00107721	5.09	ARL14	80117
235450_at	0.827338	0.165597	8.28892	2.48385e-06	0.0010832	5.08236	FBXL4	26235
1554572_a_at	-0.8873	-0.143603	-8.28391	2.4995e-06	0.0010869	5.07592	SUV39H2	79723
218758_s_at	-0.693598	-0.15845	-8.28009	2.51154e-06	0.00109109	5.071	RRP1	8568
45633_at	-0.962202	-0.166106	-8.26806	2.54981e-06	0.0011014	5.05551	GINS3	64785
229519_at	-0.754684	-0.138973	-8.25872	2.57994e-06	0.0011123	5.04347	FXR1	8087
210550_s_at	1.40332	0.130072	8.25418	2.59474e-06	0.00111763	5.03761	RASGRF1	5923
238825_at	-0.969984	-0.0148002	-8.25298	2.59866e-06	0.00111825	5.03606	ACRC	93953
211368_s_at	0.855408	-0.0414286	8.24148	2.63658e-06	0.00113243	5.02121	CASP1	834
235766_x_at	-0.897226	-0.439428	-8.21962	2.71031e-06	0.0011481	4.99294	RAB27A	5873
205018_s_at	1.52031	0.0936074	8.21945	2.71092e-06	0.0011481	4.99271	MBNL2	10150
236451_at	-1.00265	-0.426722	-8.20893	2.74717e-06	0.00115913	4.97909		100996579
200769_s_at	-0.926818	-0.147094	-8.20352	2.76604e-06	0.00116278	4.97208	MAT2A	4144
228009_x_at	-0.581933	-0.0652106	-8.19217	2.80606e-06	0.00117289	4.95735	ZNRD1,	30834
225108_at	-0.890079	-0.535329	-8.19158	2.80814e-06	0.00117289	4.95659	AGPS	8540
238681_at	1.16599	0.484676	8.17345	2.87342e-06	0.00118924	4.93303	GDPD1	284161
224492_s_at	-0.730405	0.00428315	-8.16037	2.92151e-06	0.00120624	4.91601	ZNF627	199692
238151_at	0.772134	0.322154	8.15284	2.94957e-06	0.00121421	4.90621
230893_at	0.995185	0.128528	8.15279	2.94977e-06	0.00121421	4.90614	DNAJC21	134218
244427_at	-1.14487	-0.508312	-8.14625	2.97437e-06	0.00122175	4.89762
212095_s_at	1.38723	0.0465644	8.14566	2.9766e-06	0.00122175	4.89686	MTUS1	57509
210009_s_at	-0.935829	-0.0482242	-8.14507	2.97883e-06	0.00122175	4.89609	, GOSR2	9570
225511_at	0.701904	0.180365	8.1374	3.00805e-06	0.00122819	4.88608	GPRC5B	51704
1555037_a_at	1.18889	0.128093	8.13661	3.01105e-06	0.00122831	4.88506	IDH1	3417
222666_s_at	-0.712133	-0.0727713	-8.12612	3.05152e-06	0.00123814	4.87136	RCL1	10171
211572_s_at	-0.785157	0.0025969	-8.12607	3.05172e-06	0.00123814	4.87129	SLC23A2	9962
207375_s_at	0.730577	0.102432	8.12544	3.05418e-06	0.00123814	4.87047	IL15RA	3601
218719_s_at	-0.79708	-0.141025	-8.12544	3.05419e-06	0.00123814	4.87046	GINS3	64785
213413_at	1.10773	0.517404	8.10705	3.12662e-06	0.00125663	4.84643	STON1	11037
1558044_s_at	0.682187	-0.123644	8.1025	3.14481e-06	0.00126141	4.84048	EXOSC6	118460
226446_at	0.832629	0.328876	8.09962	3.15641e-06	0.0012627	4.8367	HES6	55502
229869_at	0.834279	0.0167744	8.09752	3.16486e-06	0.00126445	4.83396
1567107_s_at	-0.981762	-0.00269637	-8.09715	3.16635e-06	0.00126445	4.83347	TPM4	7171
225073_at	-0.676103	-0.123409	-8.09208	3.18692e-06	0.00127155	4.82683	PPHLN1	51535
215224_at	-0.759399	-0.127845	-8.09015	3.19478e-06	0.00127357	4.82431	, RPL23	9349
236331_at	0.83907	0.140874	8.08504	3.2157e-06	0.00127967	4.81761
206116_s_at	-0.670682	-0.342224	-8.08354	3.22191e-06	0.00128102	4.81563	TPM1	7168
203138_at	-0.650253	-0.108236	-8.06611	3.29454e-06	0.0013008	4.79276	HAT1	8520
229587_at	-0.616035	-0.20009	-8.04992	3.36357e-06	0.00132003	4.77149	UBA2	10054
236777_at	0.632869	0.393216	8.04923	3.36656e-06	0.00132006	4.77058
205830_at	0.694756	-0.0792458	8.04222	3.39694e-06	0.00132512	4.76136	CLGN	1047
223442_at	0.806495	0.179272	8.03915	3.41035e-06	0.00132921	4.75732	NICN1,	84276
213156_at	1.23425	0.236222	8.01578	3.5143e-06	0.00136257	4.72651	MIR568, ZBTB20	693153, 26137
212432_at	-0.687806	-0.0763057	-8.01521	3.51689e-06	0.00136257	4.72575	GRPEL1	80273
227082_at	1.20962	0.163507	8.01022	3.53953e-06	0.001369	4.71917	MIR568, ZBTB20	693153, 26137
213532_at	0.695573	0.317606	8.00258	3.57451e-06	0.00137552	4.70908	ADAM17	6868
1557644_at	0.810325	0.213558	8.00178	3.57816e-06	0.00137576	4.70803	RUNDC3A-AS1
226333_at	0.829453	0.630648	7.98895	3.6378e-06	0.00139397	4.69106	IL6R	3570
1558322_a_at	1.39302	0.697807	7.97547	3.70159e-06	0.00141129	4.67322	PAQR9	344838
202819_s_at	-0.903176	-0.178505	-7.97427	3.70732e-06	0.00141136	4.67163	TCEB3	6924
231714_s_at	-0.555065	-0.034356	-7.96653	3.74457e-06	0.0014217	4.66137	AP4B1	10717
227598_at	-0.738992	-0.235605	-7.96311	3.76116e-06	0.00142444	4.65683	ZBED6CL	113763
202458_at	0.994178	-0.0267566	7.9621	3.76605e-06	0.00142511	4.6555	PRSS23	11098
236423_at	0.83249	0.392603	7.9536	3.80769e-06	0.00143545	4.64421
203065_s_at	-0.710619	-0.369683	-7.95221	3.81449e-06	0.00143545	4.64238	CAV1	857
215493_x_at	-0.635977	-0.0849104	-7.95202	3.81546e-06	0.00143545	4.64212	BTN2A1	11120
228885_at	1.09641	-0.0180445	7.94065	3.87201e-06	0.00145192	4.62702	MAMDC2	256691
209770_at	0.702765	0.0263006	7.93778	3.88642e-06	0.00145492	4.6232	BTN3A1	11119
228466_at	-0.77627	-0.340642	-7.93134	3.91896e-06	0.0014659	4.61464	GABPB2	126626
223692_at	-0.858444	-0.0982618	-7.93002	3.92569e-06	0.00146721	4.61288	NMNAT1	64802
232166_at	0.773847	0.11196	7.92048	3.97454e-06	0.00147697	4.60019	CEP126	57562
218203_at	-0.728216	-0.0802789	-7.91553	4.00009e-06	0.00148404	4.59361	ALG5	29880
220122_at	0.924384	0.376639	7.91358	4.01027e-06	0.00148543	4.591	MCTP1	79772
221646_s_at	1.14675	0.299855	7.91356	4.01037e-06	0.00148543	4.59097	ZDHHC11, ZDHHC11B	79844
201129_at	-0.867034	-0.443143	-7.90661	4.0467e-06	0.00149767	4.58171	SRSF7	6432
201193_at	1.03274	0.0798497	7.89631	4.10119e-06	0.00151291	4.56798	IDH1	3417
201111_at	-0.642263	-0.290284	-7.89181	4.12526e-06	0.0015181	4.56197	CSE1L	1434
212527_at	-0.611971	-0.0198225	-7.86342	4.28059e-06	0.00155928	4.52401	DESI1	27351
209846_s_at	0.892763	-0.102103	7.85355	4.33601e-06	0.00157526	4.5108	BTN3A2	11118
244361_at	-0.573784	-0.115819	-7.84629	4.37728e-06	0.00158313	4.50107	DPF2	5977
209932_s_at	-0.746382	-0.318966	-7.83218	4.45869e-06	0.00160065	4.48215	DUT	1854
231941_s_at	2.3984	0.174434	7.82328	4.51089e-06	0.0016149	4.47019	MUC20, MUC20P1	200958
219155_at	0.780932	0.352096	7.81141	4.58153e-06	0.00163572	4.45423	PITPNC1	26207
225007_at	-0.603366	-0.463667	-7.80822	4.60069e-06	0.0016404	4.44994	G3BP1	10146
216740_at	0.759932	0.0441365	7.79212	4.69885e-06	0.00165938	4.42826
219207_at	-0.65782	-0.00336644	-7.79208	4.69906e-06	0.00165938	4.42821	EDC3	80153
208161_s_at	1.3294	0.496233	7.79152	4.70253e-06	0.00165938	4.42745	ABCC3	8714
223898_at	-0.753989	-0.0253515	-7.76934	4.84147e-06	0.00169261	4.39754	ZNF670	93474
210761_s_at	1.2966	0.599428	7.76932	4.84162e-06	0.00169261	4.3975	GRB7	2886
209333_at	1.2302	0.592898	7.7658	4.86404e-06	0.00169712	4.39276	ULK1	8408
238927_at	-0.851115	-0.0606581	-7.75977	4.90277e-06	0.0017049	4.38461
208716_s_at	-0.67022	-0.0581902	-7.75031	4.96423e-06	0.0017184	4.37181	TMCO1	54499
229197_at	-0.603678	-0.232104	-7.74436	5.00328e-06	0.0017306	4.36376	ING5	84289
213849_s_at	0.732908	0.239147	7.73053	5.09529e-06	0.00175067	4.34503	PPP2R2B	5521
233085_s_at	-0.780202	-0.0450893	-7.70396	5.27724e-06	0.00179746	4.30897	NABP1	64859
203214_x_at	-0.929897	-0.560327	-7.70389	5.27772e-06	0.00179746	4.30888	CDK1	983
201001_s_at	-0.777488	-0.0741257	-7.70366	5.27934e-06	0.00179746	4.30857	UBE2V1, TMEM189-UBE2V1	7335, 387522
202488_s_at	0.993556	0.186441	7.65161	5.65633e-06	0.00189314	4.23767	FXYD3	5349, 102466205
203068_at	0.907348	0.463169	7.64485	5.70738e-06	0.00190322	4.22843	KLHL21	9903
225520_at	-0.586442	-0.327308	-7.64167	5.73154e-06	0.00190848	4.22409	MTHFD1L	25902
227471_at	0.603677	0.00410725	7.61754	5.91858e-06	0.00195644	4.19108	HACE1	57531
223482_at	0.653886	0.31608	7.59669	6.08548e-06	0.00200259	4.16248	TMEM120A	83862
238063_at	-0.750405	0.08066	-7.5854	6.17794e-06	0.00202306	4.14698	TMEM154	201799
230588_s_at	0.691873	0.30867	7.58053	6.21828e-06	0.00203188	4.14029
229954_at	-0.795863	-0.313516	-7.57417	6.27139e-06	0.00204044	4.13154	CHDH	55349
215359_x_at	-0.725479	-0.00247198	-7.57096	6.2983e-06	0.00204627	4.12714	ZNF44	51710
222810_s_at	-0.558922	-0.0227865	-7.55226	6.45801e-06	0.00209069	4.10139	RASAL2	9462
204589_at	0.824161	0.0149992	7.54654	6.50773e-06	0.00210379	4.0935	NUAK1	9891
204162_at	-1.07699	-0.532006	-7.49005	7.02112e-06	0.00222702	4.0154	NDC80	10403
202083_s_at	0.86326	0.522626	7.48042	7.11293e-06	0.00224362	4.00203	SEC14L1	6397
220495_s_at	-0.590346	-0.0157574	-7.46724	7.24057e-06	0.00227209	3.98374	TXNDC15	79770
218235_s_at	-0.72155	-0.0562365	-7.46721	7.24084e-06	0.00227209	3.9837	UTP11	51118
201041_s_at	1.02781	0.343015	7.46194	7.29257e-06	0.00228444	3.97638	DUSP1	1843
225750_at	-0.642953	-0.444648	-7.44014	7.51085e-06	0.00233354	3.94603	ERO1A	30001
1553956_at	-0.661475	-0.321699	-7.43445	7.56888e-06	0.00234779	3.93811	TMEM237	65062
1556134_a_at	-0.697075	-0.00969153	-7.42942	7.62061e-06	0.00235797	3.93111	B3GNT5	84002
218523_at	0.77759	0.154682	7.42518	7.66455e-06	0.00236996	3.92519	LHPP	64077
212976_at	0.861818	0.287643	7.42125	7.70552e-06	0.00237857	3.9197	LRRC8B	23507
214959_s_at	-0.791498	-0.106938	-7.42021	7.71635e-06	0.00237857	3.91826	API5P1, API5	8539
203171_s_at	-0.595146	-0.0147221	-7.40629	7.86348e-06	0.0024118	3.89882	RRP8	23378
203710_at	0.741236	0.4249	7.38044	8.14472e-06	0.00247802	3.86266	ITPR1	3708
224629_at	0.5599	0.037031	7.37983	8.15154e-06	0.00247802	3.8618	LMAN1	3998
235158_at	-0.840201	-0.127156	-7.37897	8.16114e-06	0.00247802	3.86059	TMEM209	84928
214022_s_at	1.35737	0.0164512	7.35148	8.47269e-06	0.0025404	3.82203	IFITM1, IFITM2	8519, 10581
226474_at	0.735339	0.0140171	7.34618	8.53413e-06	0.00255376	3.8146	NLRC5	84166
204125_at	-0.869619	-0.036144	-7.33465	8.66964e-06	0.00258074	3.79838	NDUFAF1	51103
1553192_at	-0.724631	-0.148085	-7.33354	8.68277e-06	0.00258169	3.79682	ZNF441	126068
217403_s_at	0.670569	0.300363	7.33342	8.68418e-06	0.00258169	3.79666	ZNF227	7770
211367_s_at	0.909613	-0.0242113	7.32986	8.72658e-06	0.00258877	3.79164	CASP1	834
204985_s_at	1.07009	-0.0703113	7.32513	8.78329e-06	0.00259516	3.78498	TRAPPC6A	79090
1557779_at	1.24962	0.00272764	7.3239	8.79797e-06	0.00259516	3.78326	LINC01468	101928687
1555758_a_at	-0.796622	-0.498175	-7.32171	8.82446e-06	0.00259961	3.78016	CDKN3	1033
209304_x_at	0.981382	0.639865	7.2889	9.23025e-06	0.00268266	3.73388	GADD45B	4616
216804_s_at	-0.740646	-0.0127285	-7.28722	9.25159e-06	0.00268372	3.7315	PDLIM5	10611
242074_at	-0.600602	-0.314984	-7.27511	9.40673e-06	0.00271832	3.71438
229991_s_at	0.606379	-0.123214	7.27035	9.46836e-06	0.00272747	3.70766
209970_x_at	0.789893	-0.048785	7.26933	9.48171e-06	0.00272958	3.70621	CASP1	834
236380_at	-0.722883	-0.0217971	-7.26768	9.50329e-06	0.00273406	3.70387	RPP14	11102
225574_at	-0.523037	-0.280898	-7.26239	9.57265e-06	0.0027476	3.69638	RWDD4	201965
1570153_at	-0.834841	-0.352058	-7.26127	9.5874e-06	0.00274783	3.6948	CCDC169	728591
209368_at	0.789351	0.0441616	7.25688	9.64546e-06	0.00275926	3.68858	EPHX2	2053
242900_at	-1.03205	-0.547258	-7.24069	9.86299e-06	0.00280561	3.66562	ALG10B	144245
238975_at	0.759176	-0.0123534	7.23046	1.00031e-05	0.0028366	3.65109	MMAB	326625
228401_at	-0.821996	-0.406288	-7.22688	1.00526e-05	0.00284709	3.64601	ATAD2	29028
209714_s_at	-0.768375	-0.512812	-7.22578	1.00679e-05	0.00284811	3.64445	CDKN3	1033
221232_s_at	0.82583	-0.111397	7.21689	1.01923e-05	0.00286524	3.6318	ANKRD2	26287
207338_s_at	-0.733307	-0.0553935	-7.21422	1.02299e-05	0.00287226	3.62801	ZNF200	7752
229842_at	1.02856	-0.181935	7.20167	1.04089e-05	0.00290315	3.61014	ELF3	1999
212554_at	-0.578735	-0.322538	-7.17171	1.08499e-05	0.00298369	3.56741	CAP2	10486
212551_at	-0.608178	-0.330634	-7.1555	1.10969e-05	0.00302783	3.54424	CAP2	10486
229790_at	-0.634017	0.00357913	-7.15339	1.11294e-05	0.00303253	3.54122	TERF2	7014
226439_s_at	1.02504	0.146614	7.14986	1.11842e-05	0.00304436	3.53616	NBEA	26960
219474_at	-0.794028	0.0472298	-7.12733	1.15403e-05	0.00312445	3.50388	C3orf52	79669
1554885_a_at	-0.969715	-0.20601	-7.10866	1.18445e-05	0.00317838	3.47708	PRIM2	5558
219409_at	-0.576315	-0.0454327	-7.10625	1.18845e-05	0.00318175	3.47361	SNIP1	79753
233168_s_at	0.68926	0.343431	7.08406	1.22585e-05	0.00325497	3.44169		83642
237817_at	-0.701926	0.138954	-7.05565	1.27558e-05	0.00335372	3.40073	SSR3	6747
228824_s_at	0.742169	0.425229	7.05214	1.28187e-05	0.00336617	3.39566	, PTGR1	22949
230031_at	-0.693339	-0.439309	-7.05178	1.28253e-05	0.00336617	3.39512	HSPA5	3309
243764_at	0.67348	0.352479	7.02969	1.32291e-05	0.00344913	3.36319	VSIG1	340547
212097_at	-0.563195	-0.333914	-7.02697	1.32798e-05	0.00345952	3.35924	CAV1	857
205687_at	0.559583	0.33773	7.01736	1.34604e-05	0.00349653	3.34533	UBFD1	56061
205580_s_at	-0.680129	-0.0979086	-7.01274	1.35483e-05	0.00351135	3.33863	HRH1	3269
204925_at	0.753428	0.541045	6.99816	1.38293e-05	0.00356387	3.31747	CTNS	1497
225955_at	0.523316	0.259472	6.99034	1.39825e-05	0.00359115	3.30612	METRNL	284207
201324_at	-0.835271	0.0944264	-6.98721	1.40443e-05	0.00360123	3.30158	EMP1	2012
231487_at	0.730319	0.377539	6.98472	1.40937e-05	0.00360952	3.29795	COX8C	341947
234303_s_at	1.12269	-0.0983914	6.97052	1.43792e-05	0.00365586	3.2773	GPR85	54329
203212_s_at	-0.525377	-0.331962	-6.96934	1.44032e-05	0.00365992	3.27558	MTMR2	8898
218295_s_at	-0.709004	-0.0932003	-6.9571	1.46545e-05	0.00370105	3.25775	, NUP50	10762
218120_s_at	-0.657144	-0.0380276	-6.90373	1.58063e-05	0.0039201	3.17978	HMOX2	3163
213916_at	-0.700037	0.00727647	-6.89627	1.59748e-05	0.00394468	3.16885	ZNF625-ZNF20, ZNF20	7568
208934_s_at	-0.784819	0.031963	-6.89366	1.60344e-05	0.00395511	3.16501	LGALS8	3964
204475_at	1.49895	1.70345	6.87481	1.64705e-05	0.00403097	3.13735	MMP1	4312
233713_at	-0.640309	-0.280211	-6.82059	1.77967e-05	0.00425148	3.05753
227565_at	0.623067	-0.0680226	6.81844	1.78518e-05	0.00426015	3.05434
212151_at	0.741255	0.0362903	6.79848	1.83698e-05	0.00436091	3.02485	PBX1	5087
224701_at	0.622333	-0.0638722	6.79656	1.84207e-05	0.00436842	3.022	PARP14	54625
213186_at	-0.692775	-0.495603	-6.78451	1.8742e-05	0.00442386	3.00417	DZIP3	9666
205437_at	0.539741	0.32	6.7644	1.9292e-05	0.0045255	2.97436	ZNF211	10520
228923_at	0.685508	0.449448	6.73757	2.00526e-05	0.00465796	2.93449	S100A6	6277
1555882_at	0.642836	0.00106237	6.73634	2.0088e-05	0.00465936	2.93267	SPIN3	169981
211208_s_at	0.472253	-0.0576201	6.73269	2.01943e-05	0.00467685	2.92723	CASK	8573
213097_s_at	-0.522195	-0.00341974	-6.72837	2.03207e-05	0.00469896	2.9208	DNAJC2	27000
227689_at	0.608112	0.365203	6.72764	2.03421e-05	0.0047015	2.91972	ZNF227	7770
228989_at	0.711714	0.0530612	6.72691	2.03634e-05	0.00470405	2.91863	TYMSOS
232752_at	-0.94837	-0.501028	-6.71595	2.06887e-05	0.00475744	2.9023	LOXL1-AS1	100287616
219334_s_at	-0.900597	0.0129003	-6.70291	2.10826e-05	0.00482125	2.88285	NABP1	64859
230240_at	0.906215	0.548028	6.68623	2.15981e-05	0.00490213	2.85794
227696_at	0.842884	-0.0942727	6.66664	2.22208e-05	0.00500224	2.82863	EXOSC6	118460
219991_at	0.762969	-0.00346993	6.66368	2.23166e-05	0.00501764	2.82419	SLC2A9	56606
211366_x_at	0.764223	-0.0590438	6.66143	2.23898e-05	0.00502537	2.82082	CASP1	834
231775_at	-0.739786	0.0641245	-6.62054	2.37627e-05	0.0052341	2.75945	TNFRSF10A	8797
201118_at	0.76456	0.487704	6.58783	2.49257e-05	0.00540649	2.71018	PGD	5226
201814_at	0.462816	-0.0914137	6.5717	2.55213e-05	0.00551726	2.68583	TBC1D5	9779
1555852_at	0.764303	-0.359853	6.52246	2.74347e-05	0.00580942	2.61127	PSMB8-AS1	100507463
1552658_a_at	-1.48005	-0.035374	-6.44965	3.05477e-05	0.00629854	2.50041	NAV3	89795
1557275_a_at	0.904104	-0.0169077	6.44622	3.07037e-05	0.00631925	2.49516	TLCD2	727910
207528_s_at	1.29818	0.927738	6.4401	3.09832e-05	0.00634519	2.48581	SLC7A11	23657
205566_at	-0.838798	-0.0459421	-6.43837	3.10629e-05	0.00635477	2.48316	ABHD2	11057
201325_s_at	-0.645573	0.10175	-6.42727	3.15785e-05	0.00643624	2.46618	EMP1	2012
205698_s_at	0.730224	-0.0191637	6.42659	3.16104e-05	0.00643884	2.46514	MAP2K6	5608
202042_at	-0.452337	0.0784432	-6.42082	3.18826e-05	0.00646823	2.45629	HARS	3035
207855_s_at	-0.545047	-0.0385849	-6.41556	3.21326e-05	0.00650803	2.44824	CLCC1	23155
239536_at	1.03045	0.499495	6.41549	3.21361e-05	0.00650803	2.44813	C1orf56	54964
1553992_s_at	0.473111	-0.0170697	6.40776	3.25073e-05	0.00657151	2.43628	NBR2	10230
226886_at	0.759691	-0.135791	6.40577	3.26039e-05	0.00657957	2.43322	GFPT1	2673
235250_at	0.534276	0.462202	6.4048	3.26507e-05	0.00658294	2.43174	FLCN	201163
204182_s_at	0.510213	0.253526	6.40079	3.28462e-05	0.0066165	2.42558	ZBTB43	23099
226419_s_at	-0.524124	-0.303973	-6.35234	3.53069e-05	0.00697926	2.35107
225329_at	-0.511735	-0.324985	-6.34275	3.58166e-05	0.00705005	2.33628	MCRIP1	348262
229514_at	-0.493741	0.0744248	-6.3399	3.597e-05	0.00707345	2.33187	GPATCH2L	55668
204671_s_at	-0.775562	-0.434471	-6.33459	3.62569e-05	0.00711755	2.32368	ANKRD6	22881
201898_s_at	-0.460367	0.0190644	-6.33158	3.64206e-05	0.00714046	2.31903	UBE2A	7319
1557116_at	0.739364	0.023122	6.31796	3.71715e-05	0.0072564	2.29798	APOL6	80830
227606_s_at	-0.456626	-0.00803235	-6.2268	4.2639e-05	0.00802412	2.15643	STAMBPL1	57559
224935_at	-0.445109	-0.286846	-6.20868	4.38242e-05	0.0082098	2.12815	EIF2S3	1968
228289_at	-0.60164	-0.359294	-6.20331	4.41819e-05	0.00824512	2.11976	BRD7	29117
201458_s_at	-0.520358	-0.3126	-6.17286	4.62702e-05	0.00854483	2.07212	BUB3	9184
212037_at	-0.547843	-0.349112	-6.16084	4.71239e-05	0.00866029	2.05326	PNN	5411
202061_s_at	0.579521	-0.0331286	6.13864	4.87432e-05	0.00885415	2.01841	SEL1L	6400
207231_at	-0.738837	-0.510484	-6.12725	4.95973e-05	0.00896631	2.00049	DZIP3	9666
226860_at	-0.60224	-0.404618	-6.11589	5.04645e-05	0.00906544	1.98261	TMEM19	55266
1552627_a_at	0.461444	0.291948	6.10117	5.16125e-05	0.00922068	1.95941	ARHGAP5,	394
46167_at	-0.562942	0.0716509	-6.09791	5.18699e-05	0.00926304	1.95428	MROH7-TTC4, TTC4	7268
203242_s_at	-0.780582	-0.0244574	-6.09596	5.20254e-05	0.00927624	1.95119	PDLIM5	10611
223013_at	0.456581	-0.0860697	6.09407	5.2176e-05	0.00928496	1.94821	TBL1XR1	79718
219210_s_at	-0.471903	0.0544804	-6.08654	5.27806e-05	0.00935953	1.93632	RAB8B	51762
225075_at	-0.609962	0.0630504	-6.04313	5.64147e-05	0.00980517	1.86764	PDRG1	81572
213206_at	0.672318	0.364945	6.0218	5.82968e-05	0.0100707	1.83379
212980_at	-0.74062	-0.46449	-6.0004	6.02519e-05	0.0103378	1.79977	AHSA2	130872
219572_at	0.538478	-0.152318	5.98845	6.13732e-05	0.0104946	1.78075	CADPS2	93664
1558626_at	0.800255	-0.0356576	5.9751	6.26527e-05	0.0106579	1.75947
201510_at	0.671477	-0.271214	5.92765	6.74341e-05	0.0112435	1.68361	ELF3,	1999
244025_at	0.594237	0.340145	5.87884	7.27558e-05	0.0118655	1.60528	ITPRIP	85450
225113_at	-0.509766	-0.298751	-5.84682	7.64876e-05	0.0123282	1.55369	AGPS	8540
1563272_at	0.573541	0.298783	5.83896	7.74341e-05	0.0124631	1.54101	TBC1D8B	54885
204337_at	-0.451296	-0.113904	-5.83799	7.75523e-05	0.0124777	1.53943	RGS4	5999
213626_at	0.532194	-0.00892364	5.8292	7.86268e-05	0.0126016	1.52524	CBR4	84869
1557055_s_at	-0.462738	0.00401447	-5.82703	7.88948e-05	0.012636	1.52174	LINC01128	643837
1553995_a_at	-0.714017	-0.0621209	-5.81566	8.03135e-05	0.0127729	1.50336	NT5E	4907
202195_s_at	0.48193	0.250828	5.70999	9.48678e-05	0.0144412	1.33163	TMED5	50999
221428_s_at	0.548405	-0.110303	5.66045	0.000102628	0.0152202	1.25057	TBL1XR1,	79718
227991_x_at	0.505191	0.231533	5.61669	0.00011004	0.0160473	1.17869	ZBTB43	23099
218593_at	-0.388841	0.0134603	-5.58988	0.000114858	0.0166167	1.13453	RBM28	55131
209755_at	0.83266	-0.156905	5.54935	0.00012257	0.0174017	1.06755	NMNAT2	23057
219353_at	-0.57623	-0.446244	-5.53714	0.000124998	0.017629	1.04734	NHLRC2	374354
242023_at	0.644894	0.415216	5.53489	0.000125452	0.0176455	1.0436	ABHD4	63874
223302_s_at	-0.426614	0.00974151	-5.50466	0.000131709	0.0182646	0.993444	ZNF655	79027
212148_at	0.982893	-0.045067	5.50228	0.000132215	0.0183068	0.989494	PBX1	5087
229517_at	0.553422	-0.0901081	5.49579	0.000133606	0.0184208	0.978715	PTPDC1	138639
204181_s_at	0.412146	0.264709	5.47587	0.000137974	0.0188009	0.945564	ZBTB43	23099
209824_s_at	0.476177	0.352054	5.47494	0.000138182	0.0188179	0.944017	ARNTL	406
219856_at	-0.672066	0.175846	-5.47459	0.00013826	0.0188229	0.943432	C1orf116	79098
57703_at	-0.515988	0.072003	-5.41641	0.000151933	0.0201359	0.846284	SENP5	205564
209546_s_at	0.49412	-0.0886814	5.41443	0.000152421	0.0201653	0.842981	APOL1	8542
228141_at	-0.445911	-0.22823	-5.38615	0.000159598	0.0209141	0.795587	GPX8	493869
206411_s_at	-0.461436	0.191945	-5.36601	0.000164926	0.0214272	0.761765	ABL2	27
218442_at	-0.432254	0.0947448	-5.34977	0.000169358	0.0218593	0.734458	MROH7-TTC4, TTC4	7268
220009_at	0.71239	0.49556	5.31038	0.000180638	0.0229057	0.668067	LONRF3	79836
216918_s_at	0.49809	-0.159504	5.29899	0.000184044	0.0232131	0.648831	DST	667
242963_at	-0.712474	0.182619	-5.28791	0.000187426	0.0235368	0.630086	SGMS2	166929
223930_at	0.412131	0.455528	5.26498	0.000194628	0.0242471	0.591269
226169_at	0.483586	-0.0818849	5.24644	0.000200663	0.0248492	0.559838	SBF2	81846
218644_at	-0.744546	0.180919	-5.24261	0.000201933	0.0249259	0.553343	PLEK2	26499
1560814_a_at	0.645368	0.44392	5.21655	0.00021081	0.0257717	0.509064	C15orf57	90416
225959_s_at	0.408199	-0.0919013	5.21536	0.000211227	0.0257992	0.507033	ZNRF1	84937
201695_s_at	-0.616609	0.230491	-5.15008	0.000235365	0.0278994	0.395693	PNP	4860
204017_at	0.556752	-0.170283	5.14803	0.000236168	0.0279642	0.392192	KDELR3	11015
223682_s_at	-0.535834	0.114324	-5.13277	0.00024224	0.0285225	0.366077	EIF1AD	84285
225415_at	0.422248	-0.135845	5.12446	0.000245615	0.028821	0.351845	DTX3L	151636
205579_at	-0.508455	0.126201	-5.12058	0.000247207	0.0289873	0.345199	HRH1	3269
215672_s_at	0.563994	0.429365	5.09099	0.000259718	0.0300745	0.29442	AHCYL2	23382
201490_s_at	-0.529111	0.0224795	-5.09006	0.000260119	0.0300979	0.292835	PPIF	10105
241371_at	-0.531596	0.104241	-5.06912	0.00026939	0.0308256	0.256821	TNFRSF10A	8797
226810_at	-0.490555	-0.330968	-5.02733	0.000288933	0.0326025	0.184816	OGFRL1	79627
1555785_a_at	-0.47167	0.0327432	-5.02591	0.000289626	0.032624	0.182354	XRN1	54464
207485_x_at	0.457901	-0.124074	5.02285	0.000291119	0.0327267	0.177069	BTN3A1	11119
242028_at	-0.588326	0.220455	-5.01413	0.000295413	0.0330875	0.162016	ZNF709,	163051
224970_at	0.535543	-0.109615	5.01256	0.000296195	0.0331505	0.1593	NFIA	4774
1554780_a_at	0.518754	0.36137	4.99743	0.000303829	0.0337428	0.133143	PHTF2	57157
201233_at	-0.407643	0.0853549	-4.96204	0.000322506	0.0353695	0.0718352	PSMD13	5719
215286_s_at	0.647998	0.404266	4.95095	0.000328602	0.0358852	0.0525938	PHTF2	57157
223742_at	-0.454311	0.0868564	-4.85735	0.000385132	0.0405264	-0.110448	MRPL4	51073
209387_s_at	-0.691692	0.173982	-4.85729	0.000385174	0.0405264	-0.110559	TM4SF1	4071
204193_at	0.378448	0.290573	4.83591	0.000399464	0.0416924	-0.147958	CHKB-CPT1B, CHKB	1120
201798_s_at	0.405221	-0.0644868	4.81925	0.000410978	0.042504	-0.177128	MYOF	26509
227314_at	0.69665	0.726299	4.81375	0.000414855	0.0427689	-0.186766	ITGA2	3673
36566_at	0.668088	0.55213	4.7546	0.000459072	0.0461965	-0.290691	CTNS	1497
1568733_at	0.507769	0.2922	4.72498	0.000483034	0.0478874	-0.34288	C10orf76	79591
206417_at	0.484067	0.369008	4.72062	0.000486678	0.0481751	-0.350587	CNGA1	1259
213124_at	-0.466082	0.115233	-4.69763	0.000506326	0.0496126	-0.391173	ZNF473	25888
201456_s_at	-0.374523	-0.320991	-4.69357	0.000509882	0.0498945	-0.39835	BUB3	9184
204821_at	0.589078	-0.283384	4.67171	0.000529491	0.0512858	-0.437037	BTN3A3	10384
219067_s_at	-0.331157	-0.273369	-4.64763	0.000551991	0.0529576	-0.479692	NSMCE4A	54780
220672_at	0.617787	0.411065	4.63977	0.000559554	0.0535928	-0.493638	PPP4R4	57718
205633_s_at	0.427905	0.375516	4.60812	0.000591107	0.0560717	-0.549846	ALAS1	211
223124_s_at	-0.348961	0.101896	-4.57432	0.000626854	0.0586915	-0.609988	PITHD1	57095
205945_at	0.632646	0.568609	4.5647	0.000637438	0.0594622	-0.627133	IL6R	3570
236042_at	-0.425993	-0.284176	-4.55503	0.000648273	0.0602752	-0.644393
205921_s_at	0.391882	0.337126	4.54008	0.000665378	0.061476	-0.671056	SLC6A6	6533
224698_at	0.389606	-0.130584	4.53577	0.000670409	0.0618277	-0.678766	ESYT2	57488
1560446_at	-0.390127	0.165695	-4.43756	0.000796181	0.0702097	-0.854679
216944_s_at	0.579652	0.420311	4.43303	0.000802539	0.0705515	-0.862812	ITPR1	3708
202241_at	0.821051	0.66577	4.43197	0.000804044	0.0706177	-0.864728	TRIB1	10221
218861_at	-0.319128	0.121538	-4.37406	0.000890375	0.0762586	-0.96897	RNF25	64320
236585_at	-0.387884	0.00892443	-4.30002	0.001015	0.0838946	-1.10276
206636_at	-0.362166	0.109277	-4.27025	0.00107009	0.0873287	-1.15669	RASA2	5922
219952_s_at	0.427547	0.344083	4.26495	0.00108021	0.0878631	-1.16629	MCOLN1	57192
222941_at	-0.507652	-0.265064	-4.26419	0.00108167	0.087942	-1.16768	USP46	64854
244455_at	0.463938	-0.222912	4.24772	0.00111383	0.0898308	-1.19756	KCNT2	343450
230405_at	0.434949	-0.0552757	4.23723	0.00113482	0.091148	-1.2166	C5orf56
222812_s_at	0.610402	0.538201	4.23512	0.0011391	0.0913469	-1.22045	RHOF	54509
212169_at	0.306745	-0.127968	4.17529	0.00126747	0.0991754	-1.32929	FKBP9P1, FKBP9	360132, 11328
204279_at	0.362751	-0.455621	4.1643	0.00129262	0.100814	-1.34932	PSMB9	5698
1555653_at	0.386812	-0.164934	4.15818	0.00130687	0.101733	-1.36048	MT-ND5	4540
203665_at	0.919721	0.931548	4.14131	0.00134696	0.104176	-1.39125	HMOX1	3162
219938_s_at	0.458129	-0.159262	4.12825	0.00137885	0.106133	-1.41508	PSTPIP2	9050
212361_s_at	-0.443204	-0.368364	-4.09555	0.00146222	0.110627	-1.47484	ATP2A2	488
224484_s_at	-0.362545	0.00586018	-4.08663	0.00148586	0.111858	-1.49116	BRMS1L	84312
213762_x_at	-0.410534	-0.379148	-4.04011	0.00161566	0.119086	-1.57634	RBMX, , RBMXP2	27316
215034_s_at	-0.80266	0.147867	-4.035	0.0016306	0.120032	-1.5857	TM4SF1	4071
220673_s_at	0.651025	0.51122	4.01187	0.00170012	0.123786	-1.62813	PPP4R4	57718
242397_at	0.832433	-0.445663	4.00569	0.00171921	0.124758	-1.63948
206751_s_at	-0.436582	0.134681	-3.99267	0.00176011	0.127238	-1.66337	PCYT1B	9468
228575_at	0.561971	-0.222652	3.97484	0.00181781	0.130579	-1.69613	IL20RB	53833
202509_s_at	0.502781	-0.215782	3.96908	0.00183687	0.131471	-1.70672	TNFAIP2	7127
235453_at	-0.382241	0.0232686	-3.93287	0.00196142	0.138339	-1.77331	TOR1AIP2	163590
225332_at	0.30315	-0.108934	3.92752	0.00198054	0.139243	-1.78316	OIP5-AS1
218739_at	-0.45491	0.156512	-3.92262	0.00199823	0.140261	-1.79218	ABHD5	51099
206157_at	-0.752213	-0.81263	-3.92252	0.00199859	0.140265	-1.79236	PTX3	5806
226805_at	0.307421	-0.13938	3.85832	0.00224599	0.153322	-1.91069	FITM2	128486
239302_s_at	-0.592811	-0.48115	-3.85629	0.00225433	0.153753	-1.91444
1554785_at	-0.357464	0.0302715	-3.83385	0.00234843	0.158249	-1.95587	CCDC82	79780
242837_at	-0.422902	-0.42355	-3.81489	0.00243105	0.162325	-1.99088
239468_at	0.436357	-0.0459512	3.73324	0.00282249	0.182023	-2.14188	MKX	283078
38241_at	0.612863	-0.208637	3.67161	0.00316032	0.198326	-2.25605	BTN3A3	10384
225093_at	0.404567	-0.15918	3.65389	0.00326497	0.203517	-2.28892	UTRN	7402
1564063_a_at	-0.367109	0.0584632	-3.6445	0.00332179	0.206315	-2.30632	ATP11B	23200
226134_s_at	-0.358266	-0.305266	-3.62407	0.00344901	0.212155	-2.34421	MSI2	124540
226478_at	-0.302531	-0.280095	-3.6226	0.00345839	0.212454	-2.34695
206884_s_at	-0.531521	-0.651004	-3.57064	0.00380584	0.228942	-2.44338	SCEL	8796
239348_at	-0.309295	-0.403056	-3.53329	0.00407747	0.241331	-2.51274
203083_at	0.374492	-0.179303	3.48748	0.00443773	0.257329	-2.59782	THBS2	7058
211822_s_at	-0.309717	0.268134	-3.45274	0.00473242	0.270147	-2.66237	NLRP1	22861
205352_at	0.369075	0.437586	3.42478	0.00498404	0.280532	-2.71432	SERPINI1	5274
228959_at	0.310479	-0.162722	3.41825	0.0050447	0.283001	-2.72645
214430_at	0.349699	0.449213	3.38679	0.00534775	0.296022	-2.7849	GLA	2717
1553338_at	-0.364693	0.111424	-3.3379	0.0058558	0.317084	-2.87571	SDE2	163859
205873_at	-0.35537	0.241806	-3.28421	0.00647033	0.342729	-2.9754	PIGL	9487
209447_at	0.362362	-0.17109	3.27106	0.00663048	0.348776	-2.9998	SYNE1	23345
1554364_at	-0.408556	0.148809	-3.26859	0.00666097	0.350127	-3.00438	PPP2R5C	5527
203608_at	-0.494481	-0.528305	-3.24503	0.00695943	0.362682	-3.04809	ALDH5A1	7915
238199_x_at	-0.623862	-0.707839	-3.23923	0.00703496	0.365648	-3.05885
1554557_at	-0.330726	0.224672	-3.23432	0.00709959	0.368046	-3.06796	ATP11B	23200
204759_at	-0.273299	0.178387	-3.21543	0.00735367	0.377134	-3.10299	RCBTB2	1102
225276_at	0.298294	-0.15475	3.16503	0.00807736	0.403822	-3.19637	GSPT1	2935
239648_at	-0.329708	0.164855	-3.13637	0.00852049	0.420705	-3.24943	DCUN1D3	123879
228411_at	0.387362	-0.148215	3.13561	0.00853254	0.421117	-3.25083	PARD3B	117583
204171_at	-0.280141	0.0841022	-3.12977	0.00862595	0.424254	-3.26164	RPS6KB1	6198
239587_at	0.515219	-0.377838	3.08409	0.00939262	0.453021	-3.34608	TLR3	7098
