# Supplementary material for: AKR1C1 as a Biomarker for Differentiating the Biological Effects of Combustible from Non-Combustible Tobacco Products
Source: Preprints.org preprint supplement (doi:10.20944/preprints201701.0111.v1), 2017-01-25
Supplement: Supplementary file 10 [file Sup_Table6_GSEA_HGEC.xlsx]

## Sheet: TPM
Name	Size	NES	NOM p-value	FDR q-value	Gene Details
KEGG_CELL_CYCLE	111	-2.48243	0	0	RBL1,CCND2,CDKN2C,TFDP2,ANAPC1,PLK1,ATR,CHEK2,CDK4,PTTG1,MCM6,CDC25A,PCNA,MCM4,CHEK1,DBF4,TP53,MYC,MCM3,MCM5,SKP2,CDC25C,TGFB2,MCM7,CDC7,CCNE2,CCNA2,CCNB1,CDC6,CCNB2,BUB1,MAD2L1,CDC20,BUB1B,TTK
KEGG_DNA_REPLICATION	34	-2.30939	0	0	POLD2,RPA1,POLD3,RPA3,RFC2,POLE3,LIG1,MCM6,PCNA,MCM4,RFC5,FEN1,POLA2,RFC4,RNASEH2A,POLA1,MCM3,MCM5,MCM7,PRIM1,RFC3,POLE2
KEGG_MISMATCH_REPAIR	22	-1.9849	0	0.00166289	MLH1,MSH2,POLD2,RPA1,MSH6,POLD3,RPA3,RFC2,LIG1,PCNA,RFC5,RFC4,EXO1,RFC3
KEGG_BASE_EXCISION_REPAIR	33	-1.97849	0	0.00124717	POLE4,APEX2,POLD1,LIG3,POLE,PARP2,HMGB1,NTHL1,POLD2,UNG,POLD3,APEX1,NEIL2,PARP1,POLE3,LIG1,PCNA,FEN1,POLE2,NEIL3
KEGG_OOCYTE_MEIOSIS	99	-1.93271	0	0.00362937	ANAPC1,PLK1,PRKX,PTTG1,CALML3,SGOL1,CDC25C,AURKA,CCNE2,CCNB1,CCNB2,BUB1,FBXO5,MAD2L1,CDC20
KEGG_LYSINE_DEGRADATION	43	-1.92903	0	0.00325728	GCDH,AASDHPPT,AADAT,SUV39H1,AASS,SETD7,PIPOX,EHHADH,PLOD2,ALDH7A1,WHSC1,ALDH1B1,SUV39H2,HADH,BBOX1,SETMAR
KEGG_PYRIMIDINE_METABOLISM	84	-1.91409	0	0.00401512	POLR2E,NME4,POLR2F,DCK,POLE,POLR3GL,POLR2D,RRM2B,UCK2,NME1,POLD2,POLR3H,POLD3,POLR1C,POLE3,POLR3B,CAD,UMPS,RRM1,POLR1E,POLR3K,POLR3G,PNPT1,DPYD,POLA2,POLR1B,TK1,POLA1,CTPS,TYMS,PRIM1,POLE2,RRM2
KEGG_SPLICEOSOME	96	-1.90122	0	0.00403605	U2AF2,THOC2,DHX8,XAB2,RBM8A,SF3B5,SART1,PQBP1,SF3B1,SNW1,ACIN1,PHF5A,DHX15,AQR,PLRG1,SF3B4,PRPF38A,SF3B14,SNRPB2,CCDC12,SNRPB,PRPF18,SF3B2,SNRPD2,CDC5L,PPIE,DDX42,DDX23,TXNL4A,PRPF8,NHP2L1,HSPA1B,LSM6,CRNKL1,NCBP2,RBM25,PRPF38B,U2AF1,SNRPG,CDC40,ZMAT2,PRPF40A,SNRPD3,RBM17,LSM7,PRPF3,SNRPA1,MAGOH,BCAS2,HSPA8,CTNNBL1,SF3B3,LSM4,THOC4,SNRPC,SNRPF,SNRPA,USP39,CHERP,SNRPE,PPIL1,LSM3,EFTUD2,NCBP1,TRA2A…
KEGG_NUCLEOTIDE_EXCISION_REPAIR	44	-1.88462	0	0.00533007	POLD1,XPC,MNAT1,GTF2H1,POLE,ERCC2,ERCC8,POLD2,RPA1,POLD3,RPA3,DDB2,RFC2,GTF2H2,POLE3,LIG1,XPA,PCNA,RFC5,RFC4,RFC3,POLE2
KEGG_HOMOLOGOUS_RECOMBINATION	26	-1.81669	0.00519031	0.0122212	POLD2,RPA1,POLD3,RPA3,RAD51C,MRE11A,BRCA2,RAD51,RAD54B,BLM
KEGG_P53_SIGNALING_PATHWAY	63	-1.79475	0.0015015	0.0143401	CCND3,CDK6,RRM2B,APAF1,CASP8,CCND1,CCND2,DDB2,ATR,CHEK2,SESN1,CDK4,CHEK1,TP53,SESN3,THBS1,CCNE2,CCNB1,CCNB2,RRM2
KEGG_RNA_POLYMERASE	28	-1.76252	0.00510204	0.0191389	POLR2J2,POLR2B,POLR2H,POLR2K,POLR1A,POLR3F,POLR3C,POLR2E,POLR2F,POLR3GL,POLR2D,POLR3H,POLR1C,POLR3B,POLR1E,POLR3K,POLR3G,POLR1B
KEGG_CYTOSOLIC_DNA_SENSING_PATHWAY	43	-1.67552	0.011041	0.04583	POLR3H,IL18,IRF7,ADAR,CCL5,POLR1C,POLR3B,POLR3K,DDX58,POLR3G,AIM2,CXCL10
KEGG_VALINE_LEUCINE_AND_ISOLEUCINE_DEGRADATION	43	-1.61704	0.0126582	0.0747009	OXCT2,ACADM,IVD,ACAT1,BCAT2,MCCC1,ACAD8,HIBCH,BCKDHB,ACADSB,MCEE,OXCT1,MCCC2,EHHADH,PCCA,ALDH7A1,ALDH1B1,HADH,AOX1
KEGG_PROGESTERONE_MEDIATED_OOCYTE_MATURATION	77	-1.59747	0.0101597	0.0816259	ANAPC1,PLK1,PRKX,MAPK10,CDC25A,PIK3R3,CDC25C,CCNA2,CCNB1,CCNB2,BUB1,MAD2L1
KEGG_AMINOACYL_TRNA_BIOSYNTHESIS	32	-1.49856	0.0493421	0.168126	VARS,LARS,TARSL2,SARS2,LARS2,DARS2,PARS2,NARS2,EARS2,MARS2
KEGG_PURINE_METABOLISM	141	-1.49026	0.0052356	0.168698	POLD1,ADCY8,GMPS,PDE4D,ADCY6,PRUNE,POLR2E,ADSL,NME4,POLR2F,DCK,PDE6B,POLE,PKM2,ATIC,POLR3GL,PRPS2,POLR2D,RRM2B,AK2,AMPD2,IMPDH2,ADCY2,NME1,POLD2,POLR3H,POLD3,GART,POLR1C,PDE5A,POLE3,POLR3B,PRPS1,RRM1,POLR1E,GMPR,GUCY1A3,PAICS,POLR3K,PPAT,POLR3G,PNPT1,POLA2,POLR1B,POLA1,PFAS,PRIM1,POLE2,RRM2
KEGG_COLORECTAL_CANCER	59	-1.48964	0.0271493	0.160097	TGFBR2,MLH1,MSH2,CCND1,JUN,MSH6,MAPK10,TCF7L1,TP53,MYC,PIK3R3,TGFB2,BIRC5
KEGG_METABOLISM_OF_XENOBIOTICS_BY_CYTOCHROME_P450	45	2.41073	0	0	CYP1B1,CYP1A1,ALDH3A1,AKR1C1,AKR1C2,ALDH1A3,UGT1A6,DHDH,CYP2C18,EPHX1,CYP2E1,CYP1A2,UGT1A9,ADH6,CYP2S1,GSTT2,MGST1,GSTO1
KEGG_STEROID_HORMONE_BIOSYNTHESIS	33	2.36029	0	0	CYP1B1,CYP1A1,SULT2B1,HSD17B2,AKR1C1,AKR1C2,UGT1A6,HSD11B1
KEGG_RETINOL_METABOLISM	32	2.02143	0	0.00184659	CYP1A1,DHRS9,UGT1A6,CYP2C18,RDH12,CYP1A2,UGT1A9,ADH6
KEGG_PPAR_SIGNALING_PATHWAY	61	1.88123	0	0.014082	MMP1,GK,ANGPTL4,PPARD,PPARA,ME1,SLC27A6,APOA1,GK2,FADS2,APOC3,CPT1A,ACOX2,PCK2,SORBS1,ACSL6,ACADL
KEGG_PHENYLALANINE_METABOLISM	16	1.86821	0.00691244	0.0157838	ALDH3A1,ALDH1A3,DDC,MAOB,AOC2,ALDH3B2,MAOA
KEGG_HEMATOPOIETIC_CELL_LINEAGE	71	1.77905	0	0.0345894	IL1R2,IL6R,ITGA2,CSF2,ANPEP,CD55,MME,ITGA5,CSF1R,CSF2RA,CD1E,CD14,CD7,IL11,DNTT,IL1A,CSF3,IL6,CD4
KEGG_SPHINGOLIPID_METABOLISM	29	1.73337	0.00493827	0.0501915	SGPP2,GAL3ST1,SPHK1,SMPD3,DEGS2,UGCG,SPTLC2,ARSA,NEU1,NEU3,B4GALT6,CERK,SMPD1
KEGG_NEUROACTIVE_LIGAND_RECEPTOR_INTERACTION	173	1.65409	0	0.091773	PRSS3,PRSS2,EDNRA,GABBR2,ADRB1,P2RX4,SSTR4,VIPR1,ADRA1A,MAS1,CHRNA3,PTAFR,CNR2,NPFFR1,GRM6,MC3R,ADCYAP1R1,CYSLTR2,CTSG,CHRNB1,HRH1,SSTR2,GPR156,MC1R,ADRB3,GIPR,TSHR,GRPR,OPRD1,GNRHR,OPRK1,CHRM4,TRPV1,ADORA2A,P2RY11,PLG,GHRHR,CHRNA10,GRIN2A,CHRND,SSTR5,VIPR2,GH2,GRIN2D,SCTR,NMUR2,GRM2,GRM8,P2RY6,GABBR1,PPYR1,GRIN1,CHRNA6,HTR5A,GABRA3,HTR1E,DRD4,HTR1F,P2RX7,HTR1B,OXTR,PTGER3,LEPR,F2,HRH2,SSTR3,CHRN…
KEGG_TRYPTOPHAN_METABOLISM	36	1.6214	0.0134771	0.108714	CYP1B1,CYP1A1,KYNU,DDC,TDO2,MAOB,CYP1A2
KEGG_DRUG_METABOLISM_CYTOCHROME_P450	47	1.60347	0.0138889	0.115437	ALDH3A1,ALDH1A3,UGT1A6,CYP2C18,MAOB,CYP2E1,CYP1A2,UGT1A9,ADH6,GSTT2,MGST1,GSTO1,GSTM4,CYP3A4,ALDH3B2,CYP3A43,CYP2A13,MAOA,CYP2D6,CYP3A7,GSTM2
KEGG_GLYCINE_SERINE_AND_THREONINE_METABOLISM	30	1.60072	0.02	0.108583	CBS,CTH,MAOB,AGXT2,PHGDH,ALAS1,SDS,PSAT1,GLYCTK,GNMT,AOC2,BHMT,GATM,SHMT2,MAOA
KEGG_ABC_TRANSPORTERS	36	1.55703	0.0248756	0.139292	ABCG1,ABCA12,ABCC3,ABCA1,ABCA4,ABCG2,ABCC2,ABCA8,ABCC12
KEGG_HISTIDINE_METABOLISM	25	1.54026	0.0430108	0.146943	ALDH3A1,ALDH1A3,AMDHD1,HNMT,DDC,MAOB
KEGG_OLFACTORY_TRANSDUCTION	74	1.5261	0.0138408	0.150492	OR5I1,PRKG1,OR1J2,OR1G1,GUCA1C,OR51M1,OR51I2,OR5L2,OR51B2,OR52D1,GUCA1B,OR2F2,OR7C2,OR1F1,CALM2,OR10J1,OR10H3,GUCY2D,OR2H2,PDE1C,OR2J2,OR4D2,OR10H1,OR2C1
KEGG_STARCH_AND_SUCROSE_METABOLISM	29	1.51828	0.0192837	0.147918	UGT1A6,UGDH,HK2,G6PC2,ENPP3,PYGB,UGT1A9
KEGG_AXON_GUIDANCE	118	1.5053	0.00373134	0.153568	SEMA3B,SEMA4B,RAC2,RND1,SEMA4D,EPHA2,EPHB3,SEMA6A,ROBO3,SEMA7A,ABLIM3,SEMA3E,ABLIM2,EPHA8,SEMA6D,PPP3R1,NFAT5,LIMK1,SLIT2,GSK3B,SEMA4G,SEMA5B,PAK4,EFNB3,EFNA2,NFATC3,SLIT3,MAPK3,SLIT1,SEMA5A,PAK6,PPP3CC,ABLIM1,PAK7,NTN4,NGEF,PAK3,SEMA6C,SEMA4C
KEGG_DORSO_VENTRAL_AXIS_FORMATION	21	1.45692	0.0565553	0.204459	NOTCH3,SOS1,SOS2,SPIRE1,NOTCH2,EGFR,MAPK3,ETS1,MAP2K1,CPEB1
KEGG_GLYCOLYSIS_GLUCONEOGENESIS	52	1.43185	0.0331492	0.227711	ALDH3A1,ENO2,ALDH1A3,HK2,G6PC2

## Sheet: WS-CM
Name	Size	NES	NOM p-value	FDR q-value	Gene Details
KEGG_CELL_CYCLE	104	-2.29503	0	0	PLK1,SMC1A,CDC25A,TFDP1,CCNE2,CDK4,PCNA,CDKN2A,PRKDC,DBF4,ESPL1,E2F5,MCM6,CDK2,MCM5,MCM4,CHEK2,TP53,MCM3,PTTG1,MCM2,MCM7,SKP2,TGFB2,CDC7,CHEK1,CDC6,CDC25C,CCNB1,MAD2L1,CCNA2,CCNB2,BUB1,CDC20,BUB1B,TTK
KEGG_DNA_REPLICATION	32	-2.1812	0	0	POLE3,POLD3,RPA1,POLD2,POLD1,POLE,RNASEH2B,RFC2,PCNA,MCM6,MCM5,RPA3,MCM4,FEN1,RFC4,POLA2,RFC5,LIG1,MCM3,RNASEH2A,MCM2,PRIM1,MCM7,POLA1,RFC3,POLE2
KEGG_OOCYTE_MEIOSIS	87	-2.04712	0	0.000695971	PLK1,SMC1A,ADCY8,CCNE2,AR,ESPL1,CDK2,PRKX,CALML3,PTTG1,CALML5,AURKA,FBXO5,CDC25C,CCNB1,MAD2L1,CCNB2,BUB1,CDC20
KEGG_HOMOLOGOUS_RECOMBINATION	25	-1.91039	0	0.0114784	POLD3,XRCC3,RPA1,POLD2,RAD51C,NBN,POLD1,RAD54L,RPA3,MRE11A,RAD54B,RAD51,BRCA2,BLM
KEGG_PYRIMIDINE_METABOLISM	72	-1.82467	0.00322061	0.029687	NME7,CTPS2,POLE3,POLD3,POLR2F,TK2,POLD2,UMPS,NME1,POLR1E,CTPS,DUT,POLD1,POLE,CAD,DHODH,POLR3G,NME4,POLR3K,RRM1,DCK,POLA2,TYMS,PRIM1,POLA1,TK1,POLE2,RRM2,DPYD
KEGG_VALINE_LEUCINE_AND_ISOLEUCINE_DEGRADATION	40	-1.80501	0	0.0325796	ACADSB,ACAT1,MCCC2,MCCC1,IVD,BCKDHB,ALDH1B1,ACADM,EHHADH,ALDH7A1,OXCT1,AOX1,HADH
KEGG_MISMATCH_REPAIR	22	-1.79809	0.0101868	0.0305879	MSH6,MLH1,POLD3,MSH2,RPA1,POLD2,POLD1,RFC2,PCNA,RPA3,RFC4,RFC5,LIG1,RFC3,EXO1
KEGG_PROGESTERONE_MEDIATED_OOCYTE_MATURATION	69	-1.77095	0.00324675	0.0388643	PRKACA,ANAPC1,AKT3,PLK1,CDC25A,ADCY8,PIK3R3,CDK2,PRKX,MAPK10,CDC25C,CCNB1,MAD2L1,CCNA2,CCNB2,BUB1
KEGG_BASE_EXCISION_REPAIR	31	-1.72698	0.0106762	0.056647	PARP3,POLE3,POLD3,XRCC1,POLD2,HMGB1,POLD1,UNG,POLE,APEX1,PCNA,PARP1,FEN1,LIG1,POLE2,NEIL3
KEGG_PURINE_METABOLISM	122	-1.71366	0.00148148	0.0586569	AK2,NME7,POLE3,POLD3,PAPSS2,PDE6A,POLR2F,GUCY2F,GART,POLD2,PDE5A,PDE6G,PKLR,GUCY1B3,NME1,PDE1B,POLR1E,POLD1,POLE,HPRT1,PRPS1L1,POLR3G,NME4,ADCY8,IMPDH2,PRPS2,POLR3K,RRM1,DCK,FHIT,PRPS1,PPAT,PAICS,POLA2,PRIM1,PFAS,POLA1,GUCY1A3,POLE2,RRM2
KEGG_VASCULAR_SMOOTH_MUSCLE_CONTRACTION	94	-1.70807	0.00323625	0.0566103	EDNRA,ITPR2,GUCY1B3,RAMP2,PLA2G4A,PRKACA,MYH11,MYL6B,PRKCA,KCNMA1,ADCY8,KCNMB4,PRKCQ,CALD1,PLCB1,RAMP1,PPP1R12B,PRKX,CALML3,CALML5,PLCB4,MYL9,GUCY1A3,ACTG2,MYLK
KEGG_BETA_ALANINE_METABOLISM	20	-1.66267	0.0156522	0.0791364	ALDH1B1,ACADM,EHHADH,ALDH7A1,DPYD
KEGG_NUCLEOTIDE_EXCISION_REPAIR	42	-1.66155	0.00897666	0.0741043	POLE3,POLD3,GTF2H3,RPA1,POLD2,GTF2H5,ERCC2,POLD1,POLE,RFC2,PCNA,RPA3,RFC4,RFC5,LIG1,RFC3,POLE2
KEGG_LYSINE_DEGRADATION	38	-1.64289	0.0209424	0.0813697	SUV39H1,ACAT1,PLOD2,ALDH1B1,EHHADH,ALDH7A1,WHSC1,SETMAR,AASS,SUV39H2,HADH,BBOX1
KEGG_METABOLISM_OF_XENOBIOTICS_BY_CYTOCHROME_P450	39	2.37097	0	0	CYP1B1,CYP1A1,ALDH3A1,AKR1C2,AKR1C1,EPHX1,GSTM4,ALDH1A3,UGT1A6
KEGG_STEROID_HORMONE_BIOSYNTHESIS	30	2.05376	0	0.00139371	CYP1B1,CYP1A1,AKR1C2,AKR1C1,HSD17B2,UGT1A6
KEGG_PORPHYRIN_AND_CHLOROPHYLL_METABOLISM	22	1.77513	0.00456621	0.0616027	HMOX1,UGT1A6,ALAS1,FECH,UGT2B15,FTH1,BLVRB
KEGG_SYSTEMIC_LUPUS_ERYTHEMATOSUS	85	1.7744	0	0.046202	HIST1H2BJ,HIST1H2BG,HIST1H4H,HIST1H2AE,H2AFJ,HIST1H4D,HIST1H3D,HIST2H2BE,HIST1H3H,HIST3H2A,HIST2H2AA3,HIST1H2AG,HIST1H3A,HIST1H2BN,HIST1H3I,HIST1H4E,HIST1H2BF,HIST1H2BI,HIST1H2AC,C6,HIST1H2BK,HIST1H2BC,HIST1H2BE,HIST1H2BH,HIST1H2BB,HIST1H2AJ,HIST1H3E,HIST1H2BD,HIST1H2AI,CD80,HIST1H2AM,HLA-DPB1
KEGG_ABC_TRANSPORTERS	30	1.74831	0.00223714	0.0475468	ABCG1,ABCC3,ABCC9,ABCG2,ABCB4,ABCB6,ABCC2,ABCA1,ABCC10
KEGG_PHENYLALANINE_METABOLISM	15	1.68433	0.012987	0.0757336	ALDH3A1,ALDH1A3,MAOB,GOT1,DDC,AOC2
KEGG_SPHINGOLIPID_METABOLISM	26	1.64708	0.0206422	0.0916903	PPAP2B,SMPD1,SPTLC2,GLA,NEU1,UGCG,CERK,SPHK2
KEGG_MAPK_SIGNALING_PATHWAY	225	1.60153	0	0.116557	HSPA6,FGF2,FOS,PTPRR,IL1R2,GADD45B,DDIT3,CD14,MAP3K14,HSPA1L,DUSP4,DUSP1,HSPA1B,HSPA1A,PDGFRA,GADD45G,DUSP8,JUND,DUSP5,TGFB1,RELB,IKBKG,DUSP2,RPS6KA6,RAC2,STK4,MAP4K4,SOS1,RASA2,PPP3R1,MAP4K1,PDGFB,ZAK,CACNA2D2,MKNK1,NFKB2,RELA,RAPGEF2,IKBKB,GRB2,PPM1A,RPS6KA3,FGF9,BRAF,TRAF6,IL1A,RPS6KA5,MAP3K8,NF1,RPS6KA2,DUSP6,IL1B,SOS2,FAS
KEGG_TRYPTOPHAN_METABOLISM	31	1.50456	0.0547368	0.216642	CYP1B1,CYP1A1,KYNU,MAOB,ALDH3A2
KEGG_SNARE_INTERACTIONS_IN_VESICULAR_TRANSPORT	31	1.49804	0.0384615	0.203936	STX3,STX1A,STX11,BET1L,VAMP1,STX4,STX18,GOSR2,VAMP4,STX5,SNAP29,STX10,BNIP1,SEC22B,STX6
KEGG_RETINOL_METABOLISM	28	1.49019	0.0457666	0.196733	CYP1A1,DHRS9,DHRS3,UGT1A6
KEGG_HISTIDINE_METABOLISM	21	1.45158	0.0788288	0.231937	ALDH3A1,ALDH1A3,MAOB,ALDH3A2,DDC,HAL

## Sheet: low-STE
Name	Size	NES	NOM p-value	FDR q-value	Gene Details
KEGG_GLYCINE_SERINE_AND_THREONINE_METABOLISM	30	-1.8455	0	0.0272886	GNMT,GATM,ALAS2,DAO,GAMT,PIPOX,SDS,GLDC,AOC3,BHMT,AOC2,MAOB,AGXT
KEGG_OLFACTORY_TRANSDUCTION	74	-1.80153	0	0.0286382	OR5P3,OR10A4,OR7A17,GUCA1C,OR51E2,OR2S2,PRKACA,OR51M1,GUCA1A,OR1Q1,OR13C4,OR2F2,OR8G1,OR51B6,OR2K2,OR51E1,CALML5,OR1I1,OR2C1,OR5L2,OR12D3,OR2F1,OR2J2,OR1G1,OR8G2,OR52D1
KEGG_PHENYLALANINE_METABOLISM	16	-1.73439	0.00689655	0.0474546	ALDH3B1,TAT,IL4I1,AOC3,DDC,AOC2,MAOB,ALDH3B2
KEGG_GLYCOLYSIS_GLUCONEOGENESIS	52	-1.58843	0.00933126	0.232696	ALDH1B1,ALDH3B1,ACSS1,FBP1,GALM,LDHC,ENO2,PKLR,GCK,ALDH3B2,PGK2,G6PC
KEGG_HEMATOPOIETIC_CELL_LINEAGE	71	-1.50019	0.00884956	0.242424	CD14,IL9R,CD3E,EPO,MME,CD19,GP1BA,CD1C,CD5,TPO,ITGAM,CSF3R,CSF1R,EPOR,THPO,CD4,KIT,IL2RA,IL6R,CD8A
KEGG_DRUG_METABOLISM_CYTOCHROME_P450	47	-1.49205	0.0232198	0.236473	GSTM2,CYP2A6,ALDH3B1,GSTA2,AOX1,CYP2C9,GSTM5,CYP2C18,UGT2B15,GSTM4,CYP3A43,MAOB,FMO5,ALDH3B2,FMO2

## Sheet: high-STE
Name	Size	NES	NOM p-value	FDR q-value	Gene Details
KEGG_CYTOSOLIC_DNA_SENSING_PATHWAY	39	-1.92996	0	0.0186283	POLR3F,POLR3C,IFNA6,DDX58,POLR3G,CCL4,IRF7,POLR3B,CXCL10,CCL5
KEGG_PEROXISOME	64	-1.75109	0	0.0942873	ACOX3,PEX16,MPV17,BAAT,GSTK1,ABCD1,EPHX2,DDO,DHRS4,PEX12,ABCD3,DAO,PECR,PEX19,AMACR,PXMP4,SOD2,PEX10,PEX7,CROT,IDH2,PMVK,HMGCL,ACAA1,PEX3,PEX11B,AGPS,PXMP2,PHYH,ACOX1,PAOX,PIPOX,EHHADH
KEGG_RIG_I_LIKE_RECEPTOR_SIGNALING_PATHWAY	54	-1.74351	0.0025641	0.0675864	FADD,DAK,RNF125,DDX3Y,TRADD,MAPK13,TRAF6,PIN1,MAPK11,MAP3K1,IFIH1,MAPK10,TNF,IFNA6,DDX58,CASP8,CASP10,IRF7,ISG15,CXCL10
KEGG_TOLL_LIKE_RECEPTOR_SIGNALING_PATHWAY	82	-1.64978	0	0.135129	IFNAR2,MAPK13,TRAF6,CD40,MAPK11,STAT1,MAPK10,TNF,IFNA6,IFNAR1,PIK3R3,CASP8,CCL4,IRAK4,TLR5,IRF7,TLR3,FOS,CXCL10,CCL5,CXCL11
KEGG_PROTEASOME	39	-1.54934	0.015748	0.237464	PSMA5,PSMD11,PSMA1,PSMB1,PSMB7,PSMA7,SHFM1,PSMA6,POMP,PSMC2,PSMB6,PSMB3,PSMA4,PSMA3,PSMD6,PSMC5,PSMD12,PSMC1,PSMD1,PSMC6,PSME2,PSMD4,PSMB2,PSMC3,PSME3,PSMB10
KEGG_CHEMOKINE_SIGNALING_PATHWAY	137	-1.51949	0	0.247668	PLCB4,NRAS,PIK3R3,CCL4,CXCL1,CXCL2,CCL27,CXCL3,CXCL10,CXCL5,CCL5,CXCL11
KEGG_NOD_LIKE_RECEPTOR_SIGNALING_PATHWAY	44	-1.50966	0.0218447	0.226615	CARD8,MAPK13,TRAF6,MAPK11,MAPK10,TNF,CASP8,CXCL1,CXCL2,CCL5
KEGG_STEROID_HORMONE_BIOSYNTHESIS	30	2.0011	0	0.00508113	CYP1B1,CYP1A1,HSD11B1,UGT1A6,AKR1C2,AKR1C1,HSD17B2,HSD17B6
KEGG_ARACHIDONIC_ACID_METABOLISM	40	1.94625	0	0.00507567	GPX2,PLA2G10,PLA2G4A,PTGS1,CYP2E1,ALOX15B,CBR1,GPX3,CBR3,GPX4,ALOX12B,PTGS2,PLA2G3,AKR1C3,CYP2J2,PLA2G4B,CYP4F2
KEGG_METABOLISM_OF_XENOBIOTICS_BY_CYTOCHROME_P450	39	1.89725	0	0.00945336	CYP1B1,CYP1A1,UGT1A6,AKR1C2,ALDH3A1,AKR1C1,CYP2E1,GSTM4,EPHX1,AKR1C3,GSTM3,ALDH3B2
KEGG_PHENYLALANINE_METABOLISM	15	1.86493	0	0.0122835	AOC2,ALDH3A1,AOC3,ALDH3B2
KEGG_GLYCEROPHOSPHOLIPID_METABOLISM	51	1.76704	0.00163666	0.0367546	PLA2G10,PLA2G4A,ETNK2,PPAP2C,CHPT1,PPAP2B,PGS1,PLA2G3,DGKD,PTDSS2,PLA2G4B,PTDSS1,LPGAT1,DGKE,ETNK1,DGKZ,GPD1L,CDIPT
KEGG_BASAL_CELL_CARCINOMA	43	1.73561	0	0.0446834	FZD10,WNT5A,WNT2B,FZD2,DVL3,FZD3,TCF7L1,DVL1,WNT5B,AXIN1,PTCH1,DVL2,TCF7L2,GLI3,BMP2
KEGG_NOTCH_SIGNALING_PATHWAY	33	1.66846	0.00512821	0.0806495	DTX4,DVL3,NOTCH1,DVL1,DLL3,DTX2,RFNG,NCOR2,ADAM17,CTBP1,DVL2,EP300,HES1,MAML1,CREBBP,CTBP2,NOTCH3
KEGG_LINOLEIC_ACID_METABOLISM	21	1.60443	0.0192308	0.135664	AKR1B10,PLA2G10,PLA2G4A,CYP2E1,PLA2G3,CYP2J2,PLA2G4B
KEGG_GLYCEROLIPID_METABOLISM	31	1.59679	0.0101523	0.128681	GLA,PPAP2C,GK,PPAP2B,AKR1B1,DGKD,ALDH3A2,DGKE,DGKZ,PNLIPRP1,CEL,AGPAT4
KEGG_WNT_SIGNALING_PATHWAY	123	1.58138	0.00157233	0.135828	FZD10,SFRP1,FRAT2,SMAD3,FOSL1,WNT5A,WNT2B,FZD2,NFAT5,LRP5,PRKCA,DVL3,FZD3,CSNK1E,TCF7L1,MAPK9,DVL1,WNT5B,AXIN1,NFATC3,MYC,PORCN,PPP2R5A,TBL1X,RAC2,NFATC4,TBL1XR1,CTBP1,DVL2,TCF7L2,SIAH1,PPP3R1,NFATC1,CCND3,EP300
KEGG_VEGF_SIGNALING_PATHWAY	62	1.57917	0.00489396	0.126467	PLA2G10,PLA2G4A,NFAT5,PRKCA,BAD,PIK3CD,PTGS2,PLA2G3,MAP2K2,SRC,NFATC3,PLA2G4B,RAC2,SHC2,SPHK2,CASP9,NFATC4,PPP3R1,NFATC1,NOS3,MAPKAPK2,RAF1,PLA2G2E,PXN,PIK3CB,PPP3CC,MAP2K1
KEGG_ERBB_SIGNALING_PATHWAY	76	1.54354	0.00782473	0.157532	HBEGF,PAK6,GAB1,NRG2,PRKCA,CDKN1B,BAD,PIK3CD,MAPK9,EGFR,MAP2K2,SRC,MYC,CRKL,CBLB,NCK2,ARAF,PAK2,SHC2,EREG,PAK3,RAF1,SOS1,PIK3CB,ELK1,EIF4EBP1,ERBB2,MAP2K1,AKT3,CAMK2A,STAT5A
KEGG_ABC_TRANSPORTERS	30	1.54298	0.0343643	0.146039	ABCC5,ABCG2,ABCB6,ABCG1,ABCC2,ABCC4,ABCC9,ABCC1
KEGG_COMPLEMENT_AND_COAGULATION_CASCADES	48	1.52182	0.020979	0.162758	PLAT,F2R,CFD,F12,CD55,BDKRB1,SERPING1,C6,C1S
KEGG_AXON_GUIDANCE	99	1.50968	0.00461538	0.167024	PAK6,EFNB3,EPHB3,NFAT5,LIMK1,CDK5,SRGAP3,EPHA1,NRP1,SEMA4D,SEMA3F,EPHA2,NFATC3,EFNA4,NCK2,SEMA4C,EPHB4,SRGAP2,PAK2,RGS3,RAC2,SLIT3,ABLIM1,NFATC4,PLXNA2,DPYSL2,ROBO1,PPP3R1,NFATC1,PLXNA3,PAK3,RND1
KEGG_CELL_CYCLE	104	1.48595	0.0156495	0.18651	CDC7,CDKN1C,TGFB1,SMAD3,CDC25B,E2F5,PTTG1,MCM7,CDC6,CCNE1,CDC14B,CDKN1B,MAD2L1,CDC20,CDC25A,GADD45B,MYC,BUB1B,ZBTB17,TFDP2,GADD45G,TFDP1,MAD1L1,CDKN2D,CHEK2,MCM5,RBL2,CCNB1,E2F3,CCNA1,MCM2,ANAPC2,STAG1,CCND3,CDC27,EP300,ANAPC1
KEGG_ACUTE_MYELOID_LEUKEMIA	54	1.48483	0.0194175	0.177506	CEBPA,RUNX1,PIM2,BAD,PIK3CD,TCF7L1,MAP2K2,MYC,IKBKB,ARAF,TCF7L2,RUNX1T1,CCNA1,PIM1,RAF1,SOS1,KIT,PIK3CB,RELA,EIF4EBP1,MAP2K1,AKT3,CHUK,STAT5A
KEGG_MAPK_SIGNALING_PATHWAY	225	1.48231	0.00286944	0.170315	FGF13,PLA2G10,PLA2G4A,NF1,TGFB1,MAP3K8,ECSIT,CACNB3,CDC25B,CD14,RPS6KA6,FLNC,FGF2,DUSP5,MAP3K12,HSPA2,PRKCA,PDGFA,FGF9,RPS6KA1,DDIT3,IL1B,DAXX,MAPK9,DUSP7,PLA2G3,DUSP10,MAP3K4,MAX,DUSP6,EGFR,MAP2K2,BDNF,MAP3K14,MAP2K5,GADD45B,MYC,CRKL,TGFBR1,RAPGEF2,TNFRSF1A,PLA2G4B,NR4A1,IKBKB,PAK2,RAC2,MAP4K2,GADD45G,TAOK3,MAP3K11,NFATC4,RELB,ATF2,IL1A,GNA12,PPP3R1,PPM1A,RASGRP2,ATF4,MAP4K1,MKNK1,PDGFRA,MAPKAPK…
KEGG_RETINOL_METABOLISM	28	1.46516	0.04363	0.182232	CYP26B1,CYP1A1,UGT1A6
KEGG_GLUTATHIONE_METABOLISM	38	1.45479	0.0580431	0.186494	GPX2,GSR,G6PD,GSTM4,GCLM,PGD,GPX3,GCLC,GPX4
KEGG_JAK_STAT_SIGNALING_PATHWAY	110	1.41096	0.0221169	0.24564	IL24,SPRY2,CSF2,IL6R,IL11,STAT4,IL11RA,IL7,SPRY4,SOCS2,SPRED2,PIK3CD,GHR,IL13RA2,IL15RA,IL22RA1,MYC,PIAS4,IL10RA,CBLB,IL15,IL20RA,TPO,SOCS7,PIM1,PIAS1,CCND3,EP300,SOS1,BCL2L1,SOCS1,PIK3CB,PRL,EPOR,AKT3,LIFR,IFNA14,STAT5A,CTF1,SOCS5,IFNA13,GH2,CREBBP
KEGG_FC_GAMMA_R_MEDIATED_PHAGOCYTOSIS	75	1.4059	0.0241158	0.243586	PLA2G4A,PPAP2C,PPAP2B,WASF3,PRKCA,LIMK1,PIK3CD,VAV3,WASF1,GAB2,HCK,CRKL,PRKCD,PLA2G4B,LYN,RAC2,SPHK2
KEGG_SPHINGOLIPID_METABOLISM	26	1.39668	0.0697674	0.248759	GLA,PPAP2C,PPAP2B,B4GALT6,DEGS1,CERK,NEU1,SPHK2

## Sheet: low-NIC
Name	Size	NES	NOM p-value	FDR q-value	Gene Details

## Sheet: high-NIC
Name	Size	NES	NOM p-value	FDR q-value	Gene Details
KEGG_FATTY_ACID_METABOLISM	33	-1.74945	0.002457	0.209027	ALDH7A1,HADHA,ACAA1,ACOX3,ACSL4,HADH,ACAA2,ACADVL,EHHADH,GCDH,ACSL1,ALDH3A2,ADH6,ACADS,ACADSB,ACOX1,ACADL
KEGG_SYSTEMIC_LUPUS_ERYTHEMATOSUS	85	-1.71818	0.00285714	0.150925	SNRPD1,HIST1H2BK,HIST1H2BL,H2AFV,CD40,HIST1H2BH,HLA-DQB1,SSB,HIST1H4D,HIST1H2BD,H2AFX,HIST1H3G,HIST1H3I,HLA-DRB1,HLA-DRB4,HIST1H3E,HIST1H2AC,H2AFJ,HIST1H2AI,HIST1H2BG,HIST1H3B,C5,HIST1H2BE,HIST1H2AG,HIST1H4C,HIST1H2BF,HLA-DMB,FCGR1A,HIST1H2AE,HIST2H2BE,HIST1H3F,HIST1H2AJ,HIST1H2BM,HIST1H2BJ,HIST1H3D,HIST2H2AA3,HIST1H2BI,C1QB,HIST1H2AM,HIST1H4E,TNF,HIST1H2BC
KEGG_DNA_REPLICATION	32	-1.67198	0.0119048	0.162836	POLD3,RNASEH1,POLD4,FEN1,POLE,MCM2,RNASEH2A,RFC2,MCM3,RFC5,MCM5,RFC3,RPA3,PRIM1,MCM7,MCM6,LIG1,PCNA,POLA1,POLE2
